# Supplementary material for: Comparative Transcriptome Analysis Reveals Novel Candidate Resistance Genes Involved in Defence against Phytophthora cactorum in Strawberry
Source: MDPI journal article supplement (doi:10.3390/ijms241310851), 2023-06-29
Supplement: s1 [file s1]

**Supplementary Table S1.** List of primers used for the present study

| Primer Name <sup>a</sup> | Sequence (5' – 3')                                    | Amplicon size (bp) | Annealing temperature (°C) |
|--------------------------|-------------------------------------------------------|--------------------|----------------------------|
| <b>For PCR</b>           |                                                       |                    |                            |
| FvH4_5g24630-F1          | GTGGCGGTGTTTAGGTGTCT                                  | 411                | 60                         |
| FvH4_5g24630-R1          | TAGAACATTTTTCGCTCACG                                  |                    |                            |
| FvH4_5g24630-F2          | GGTGTCTTCTTCGTGGTGGT                                  | 461                | 60                         |
| FvH4_5g24630-R2          | GATCAACTGCCTTGCCTACA                                  |                    |                            |
| FvH4_4g20050-F           | TCTCTTTCGTCGCTTCCTTC                                  | 800                | 60                         |
| FvH4_4g20050-R           | CCAAACTGGAAAATCCCAAA                                  |                    |                            |
| FvH4_7g05680-F           | GAGGCAACACAACCTGGTTCA                                 | 429                | 55                         |
| FvH4_7g05680-R           | GAACATAATCGCGGAATCCAA                                 |                    |                            |
| FvH4_1g22440-F1          | TCGGGAGTTCTCTTGCTGTT                                  | 582                | 60                         |
| FvH4_1g22440-R1          | TGAAGGTTGCAGAAGACACG                                  |                    |                            |
| FvH4_1g22440-F2          | TTTGGATCTTCCCGATTACG                                  | 482                | 60                         |
| FvH4_1g22440-R2          | CCAACATTCCCCAAAAATTG                                  |                    |                            |
| FvH4_6g53350-F           | TTTCTATGGCTTCCCTGTCTG                                 | 569                | 55                         |
| FvH4_6g53350-R           | AGAACGGAAGTGCCATCATC                                  |                    |                            |
| FvH4_7g20440-F           | CTATGGCGAAAACACGGAAC                                  | 593                | 60                         |
| FvH4_7g20440-R           | AGAGATGCCGGATCTGTGAA                                  |                    |                            |
| FvH4_7g20440-F2          | CTGGTACGCGGAGGGTAGTA                                  | 662                | 60                         |
| FvH4_7g20440-R2          | CTCCTCGACGGTAGACTTGG                                  |                    |                            |
| FvH4_3g14180-F1          | CAAGATGCTGCTCATTGGA                                   | 648                | 60                         |
| FvH4_3g14180-R1          | CAGGGCATGACCTACACCTT                                  |                    |                            |
| FvH4_3g14180-F2          | GGCAGCATAGTTGCAGTGAA                                  | 545                | 60                         |
| FvH4_3g14180-R2          | GCTCTGCCAAAGACACAACA                                  |                    |                            |
| FvH4_5g16110-F1          | CAGAATGTGGTGGGTGAGTG                                  | 643                | 60                         |
| FvH4_5g16110-R1          | TTGGAAGGGACGATTACGAG                                  |                    |                            |
| FvH4_5g16110-F2          | AACCTGCATTGTGGGATAGC                                  | 597                | 60                         |
| FvH4_5g16110-R2          | AAACCAAGCGTTGGTGAAAC                                  |                    |                            |
| FvH4_6g34080-F1          | CGGAAAAGGGCAATCACTCT                                  | 624                | 60                         |
| FvH4_6g34080-R1          | ATCTTCTTGTGTCGGCATGG                                  |                    |                            |
| FvH4_6g34080-F2          | TGGCAAGCGATCCACTTAAT                                  | 441                | 60                         |
| FvH4_6g34080-R2          | GGCAGGCCAATACAGTAACG                                  |                    |                            |
| FvH4_5g16070-F1          | GCAGGAGGTTCAGAAAGGTG                                  | 697                | 60                         |
| FvH4_5g16070-R1          | GTTTTTCAGCAAGGAGCCAAG                                 |                    |                            |
| FvH4_5g16070-F2          | AAGCTGCGCCATATTGAACT                                  | 415                | 60                         |
| FvH4_5g16070-R2          | CAGCAACAAGGTCAGCAAAA                                  |                    |                            |
| FvH4_3g21000-F           | TTTCTAGCGTGACCGTTCT                                   | 501                | 60                         |
| FvH4_3g21000-R           | CTTCTTCCGAGCATTTTTGG                                  |                    |                            |
| FvH4_1g22450-F           | CCGGTACTCTGGTGAAGCAT                                  | 632                | 60                         |
| FvH4_1g22450-R           | GGGGTGAAAAAGAGCAAACA                                  |                    |                            |
| GW_FvH4_1g22450-F        | GGGGACAAGTTTGTACAAAAAAGCAG<br>GCTATGGATCCGTGGGTTGATGT | 1363               | 60                         |
| GW_FvH4_1g22450-R        | GGGGACCACTTTGTACAAGAAAGCTGG<br>GTTTAAACATCCTCTGTCATAA |                    |                            |

| Primer Name <sup>a</sup> | Sequence (5′ – 3′)                                      | Amplicon size (bp) | Annealing temperature (° C) |
|--------------------------|---------------------------------------------------------|--------------------|-----------------------------|
| EF1a-F <sup>b</sup>      | CTGTAACAAGATGGATGCCACC                                  | 803                | 60                          |
| EF1a-R                   | GGCGCATGTCCCTCACAGCAA                                   |                    |                             |
| For RT-PCR               |                                                         |                    |                             |
| GW_FvH4_1g22440-F        | GGGGACAAGTTTGTACAAAAAAGCAG<br>GCTATGATGTCTTTAGCCAAAAC   | 1180               | 60                          |
| GW_FvH4_1g22440-R        | GGGGACCACTTTGTACAAGAAAGCTGG<br>GTCTATCTGCCGGTGGTGCCTT   |                    |                             |
| GW_FvH4_7g20440-F        | GGGGACAAGTTTGTACAAAAAAGCAG<br>GCTATGGCGAAAACACGGAACA    | 1768               | 60                          |
| GW_FvH4_7g20440-R        | GGGGACCACTTTGTACAAGAAAGCTGG<br>GTGTCCTACTTAAGCCAGTCCT   |                    |                             |
| GW_FvH4_5g24630-F        | GGGGACAAGTTTGTACAAAAAAGCAG<br>GCTATGGTGACTGTGTTTGGGCGT  | 292                | 60                          |
| GW_FvH4_5g24630-R        | GGGGACCACTTTGTACAAGAAAGCTGG<br>G TTCAGCCTCCATAGCCACGTAC |                    |                             |
| GW_FvH4_6g34080-F        | GGGGACAAGTTTGTACAAAAAAGCAG<br>GCTATGGAATATCACCAGTTCTA   | 721                | 60                          |
| GW_FvH4_6g34080-R        | GGGGACCACTTTGTACAAGAAAGCTGG<br>GTTTAATCTTCTTGTGTGCGGCAT |                    |                             |
| GW_FvH4_5g16110-F        | GGGGACAAGTTTGTACAAAAAAGCAG<br>GCTATGCTGATTCTCGAAATACT   | 2905               | 60                          |
| GW_FvH4_5g16110-R        | GGGGACCACTTTGTACAAGAAAGCTGG<br>G TTCACGATTGAATTATTCCA   |                    |                             |
| GW_FvH4_5g16070-F        | GGGGACAAGTTTGTACAAAAAAGCAG<br>GCTTTGACCTTGCCCTTCCTTCT   | 3228               | 60                          |
| GW_FvH4_5g16070-R        | GGGGACCACTTTGTACAAGAAAGCTGG<br>G TTCATGTGAACCGAAAAAGAT  |                    |                             |
| GW_FvH4_1g22450-F        | GGGGACAAGTTTGTACAAAAAAGCAG<br>GCTATGGATCCGTGGGTTGATGT   | 1197               | 60                          |
| GW_FvH4_1g22450-R        | GGGGACCACTTTGTACAAGAAAGCTGG<br>GTTTAAACATCCTCTGTCATAA   |                    |                             |
| GW_FvH4_6g18970-F        | GGGGACAAGTTTGTACAAAAAAGCAG<br>GCTATGGAGGCGCCGGGTCCCT    | 2602               | 60                          |
| GW_FvH4_6g18970-R        | GGGGACCACTTTGTACAAGAAAGCTGG<br>G TTCATGTAGCCACCATGCGCG  |                    |                             |

<sup>a</sup>Primer name refers to the *F. vesca* Hawaii v4.a1 gene ID; F and R indicate forward and reverse primers, respectively; GW indicates attB1 or attB2 sequences (in italics) from the Gateway cloning system. <sup>b</sup>*EF1a* gene (*Elongation factor 1 alpha*) primer sequences used in this study were obtained from Clancy *et al.*<sup>1</sup>
