# Supplementary material for: Comparative Transcriptome Analysis Reveals Novel Candidate Resistance Genes Involved in Defence against Phytophthora cactorum in Strawberry
Source: Int J Mol Sci. 2023 Jun 29;24(13):10851. doi: 10.3390/ijms241310851 (PMC10341869; doi:10.3390/ijms241310851)
Supplement: Supplementary file 1 [file ijms-24-10851-s001.zip]

Archive with 6 entries (6 files):
- Supplementary Figures.pdf
- Supplementary Table S1.pdf
- Supplementary_material_S1.xlsx
- Supplementary_material_S2.xlsx
- Supplementary_material_S3.xlsx
- Supplementary_material_S4.xlsx
