# Supplementary material for: Comparative Transcriptome Analysis Reveals Novel Candidate Resistance Genes Involved in Defence against Phytophthora cactorum in Strawberry
Source: Int J Mol Sci. 2023 Jun 29;24(13):10851. doi: 10.3390/ijms241310851 (PMC10341869; doi:10.3390/ijms241310851)
Supplement: Supplementary file 1 [file ijms-24-10851-s001.zip › Supplementary_material_S1.xlsx]

## Sheet: Description
Supplementary Material S1: List of Fragaria vesca transcripts that has a BLAST hit to F. vesca v4.0.a1 genome
Sheet name	Description	Link
F.vesca_transcripts_e-10	List of Fragaria vesca transcripts (Trinity IDs from the de novo transcriptome analysis) that had a BLAST hit to F. vesca v4.0.a1 protein sequences (cutoff expectation (e) value ≤ e-10). Best hits from the reciprocal BLAST (blastx and tblastn) were selected for downstream analysis.	https://www.rosaceae.org/species/fragaria_vesca/genome_v4.0.a1
NCBI Nr	F. vesca transcripts (Trinity IDs) annotated from the NCBI non-redundant (Nr) protein database. The reciprocal BLAST hits F. vesca v4.0.a1 (accession Hawaii4) gene IDs were combined from the sheet (F.vesca_transcripts_e-10).
KEGG_orthologs	F. vesca transcripts (Trinity IDs) with the corresponding F. vesca v4.0.a1 genes that mapped to KEGG Orthologs transcripts. Briefly, the file "Fragaria vesca v4.0.a1 transcripts mapped to KEGG Orthologs transcripts (EXCEL file)" was downloaded from the Genome Database for Rosaceae database and the annotations were added to the corresponding transcripts.	https://www.rosaceae.org/species/fragaria_vesca/genome_v4.0.a1
InterPro domain	F. vesca transcripts (Trinity IDs) with the corresponding F. vesca v4.0.a1 genes and the InterPro Domain annotations. Briefly, the file "InterPro Domains for Fragaria vesca v4.0.a1 transcripts (EXCEL file)" was downloaded from the Genome Database for Rosaceae database and the annotations were added to the corresponding transcripts.	https://www.rosaceae.org/species/fragaria_vesca/genome_v4.0.a1
Final	F. vesca transcripts (Trinity IDs) with the corresponding F. vesca v4.0.a1 genes and annotations (NCBI Nr, KEGG Orthologs, and InterPro Domains).

## Sheet: F.vesca_transcripts_e-10
Trinity_ID	Longest transcript isoforms_ID	F. vesca Hawaii4_ID	pct_identity	e_value	Bit_Score
TRINITY_DN100_c0_g1	TRINITY_DN100_c0_g1_i2	FvH4_5g39450.1	100	0	2660
TRINITY_DN10005_c0_g1	TRINITY_DN10005_c0_g1_i1	FvH4_2g23780.1	100	0	786
TRINITY_DN10006_c0_g1	TRINITY_DN10006_c0_g1_i1	FvH4_2g26690.1	100	0	678
TRINITY_DN10007_c0_g1	TRINITY_DN10007_c0_g1_i1	FvH4_7g31510.1	100	0	1083
TRINITY_DN10018_c0_g1	TRINITY_DN10018_c0_g1_i1	FvH4_4g28360.1	100	0	1325
TRINITY_DN10021_c1_g2	TRINITY_DN10021_c1_g2_i5	FvH4_7g02820.1	100	0	800
TRINITY_DN10022_c0_g1	TRINITY_DN10022_c0_g1_i7	FvH4_6g38330.1	100	0	809
TRINITY_DN10023_c0_g1	TRINITY_DN10023_c0_g1_i1	FvH4_2g12490.1	100	5e-132	385
TRINITY_DN10026_c0_g1	TRINITY_DN10026_c0_g1_i2	FvH4_3g23560.1	100	0	1145
TRINITY_DN10027_c0_g2	TRINITY_DN10027_c0_g2_i2	FvH4_6g29630.1	100	0	613
TRINITY_DN1003_c0_g1	TRINITY_DN1003_c0_g1_i4	FvH4_5g11000.1	100	2e-50	158
TRINITY_DN10030_c0_g1	TRINITY_DN10030_c0_g1_i4	FvH4_5g15250.1	100	1e-126	371
TRINITY_DN10032_c0_g1	TRINITY_DN10032_c0_g1_i2	FvH4_4g30550.1	100	0	900
TRINITY_DN10035_c0_g1	TRINITY_DN10035_c0_g1_i1	FvH4_4g05100.1	100	0	1239
TRINITY_DN10037_c0_g1	TRINITY_DN10037_c0_g1_i1	FvH4_1g11750.1	100	0	1312
TRINITY_DN100380_c0_g1	TRINITY_DN100380_c0_g1_i1	FvH4_3g01180.1	100	1e-66	202
TRINITY_DN100380_c1_g1	TRINITY_DN100380_c1_g1_i1	FvH4_7g07170.1	100	8e-54	172
TRINITY_DN1004_c0_g1	TRINITY_DN1004_c0_g1_i7	FvH4_4g33550.1	100	2e-158	469
TRINITY_DN10046_c0_g1	TRINITY_DN10046_c0_g1_i4	FvH4_2g24570.1	100	0	2011
TRINITY_DN10049_c0_g1	TRINITY_DN10049_c0_g1_i2	FvH4_3g35660.1	100	1e-34	125
TRINITY_DN10054_c0_g1	TRINITY_DN10054_c0_g1_i1	FvH4_4g19930.1	100	0	1627
TRINITY_DN10059_c0_g1	TRINITY_DN10059_c0_g1_i2	FvH4_6g35500.1	100	0	608
TRINITY_DN1006_c0_g1	TRINITY_DN1006_c0_g1_i1	FvH4_3g44330.1	100	0	929
TRINITY_DN1006_c0_g2	TRINITY_DN1006_c0_g2_i1	FvH4_5g02880.1	100	5e-111	320
TRINITY_DN1006_c1_g2	TRINITY_DN1006_c1_g2_i1	FvH4_7g30500.1	100	0	954
TRINITY_DN10063_c0_g2	TRINITY_DN10063_c0_g2_i4	FvH4_5g19150.1	100	0	543
TRINITY_DN10064_c0_g2	TRINITY_DN10064_c0_g2_i1	FvH4_3g21210.1	100	0	1111
TRINITY_DN10075_c0_g2	TRINITY_DN10075_c0_g2_i1	FvH4_6g01060.1	100	0	1513
TRINITY_DN10078_c1_g1	TRINITY_DN10078_c1_g1_i1	FvH4_2g24420.1	100	0	847
TRINITY_DN10086_c0_g1	TRINITY_DN10086_c0_g1_i4	FvH4_7g15840.1	100	8e-144	423
TRINITY_DN10087_c0_g1	TRINITY_DN10087_c0_g1_i4	FvH4_2g38760.1	100	0	1677
TRINITY_DN100888_c0_g1	TRINITY_DN100888_c0_g1_i1	FvH4_6g36290.1	100	1e-21	82.4
TRINITY_DN10091_c0_g1	TRINITY_DN10091_c0_g1_i2	FvH4_4g27760.1	100	8e-167	505
TRINITY_DN10093_c0_g1	TRINITY_DN10093_c0_g1_i2	FvH4_6g17460.1	100	2e-107	328
TRINITY_DN10095_c0_g1	TRINITY_DN10095_c0_g1_i2	FvH4_5g38460.1	100	6e-32	119
TRINITY_DN10096_c0_g1	TRINITY_DN10096_c0_g1_i1	FvH4_5g05970.1	100	6e-126	374
TRINITY_DN1010_c1_g1	TRINITY_DN1010_c1_g1_i3	FvH4_5g07540.1	100	0	1003
TRINITY_DN10103_c1_g2	TRINITY_DN10103_c1_g2_i5	FvH4_2g15650.1	100	0	1538
TRINITY_DN1011_c0_g1	TRINITY_DN1011_c0_g1_i4	FvH4_3g00080.1	100	2e-82	274
TRINITY_DN1012_c0_g1	TRINITY_DN1012_c0_g1_i1	FvH4_7g26960.1	100	0	612
TRINITY_DN10121_c0_g1	TRINITY_DN10121_c0_g1_i1	FvH4_4g05510.1	100	0	520
TRINITY_DN10127_c0_g1	TRINITY_DN10127_c0_g1_i1	FvH4_1g04220.1	100	2e-158	488
TRINITY_DN1013_c0_g2	TRINITY_DN1013_c0_g2_i5	FvH4_7g00100.1	100	6e-50	171
TRINITY_DN10133_c0_g1	TRINITY_DN10133_c0_g1_i1	FvH4_2g35850.1	100	0	1913
TRINITY_DN1014_c0_g3	TRINITY_DN1014_c0_g3_i2	FvH4_4g36790.1	100	0	1362
TRINITY_DN10144_c0_g1	TRINITY_DN10144_c0_g1_i2	FvH4_5g09330.1	100	4e-99	310
TRINITY_DN10146_c1_g1	TRINITY_DN10146_c1_g1_i1	FvH4_5g21650.1	100	0	1400
TRINITY_DN1015_c0_g1	TRINITY_DN1015_c0_g1_i2	FvH4_4g25170.1	100	0	668
TRINITY_DN10151_c0_g1	TRINITY_DN10151_c0_g1_i1	FvH4_4g22440.1	100	0	1890
TRINITY_DN10154_c0_g1	TRINITY_DN10154_c0_g1_i1	FvH4_5g24680.1	100	4e-110	326
TRINITY_DN101552_c0_g1	TRINITY_DN101552_c0_g1_i1	FvH4_5g33850.1	100	4e-50	127
TRINITY_DN10157_c0_g1	TRINITY_DN10157_c0_g1_i1	FvH4_7g09240.1	100	3e-136	393
TRINITY_DN10157_c0_g3	TRINITY_DN10157_c0_g3_i1	FvH4_2g18920.1	100	6e-156	450
TRINITY_DN10158_c0_g1	TRINITY_DN10158_c0_g1_i1	FvH4_4g10680.1	100	4e-94	301
TRINITY_DN10160_c0_g1	TRINITY_DN10160_c0_g1_i1	FvH4_6g09390.1	100	0	850
TRINITY_DN10165_c1_g1	TRINITY_DN10165_c1_g1_i4	FvH4_5g38080.1	100	0	873
TRINITY_DN10170_c0_g1	TRINITY_DN10170_c0_g1_i3	FvH4_5g34680.1	100	0	1940
TRINITY_DN10174_c0_g1	TRINITY_DN10174_c0_g1_i1	FvH4_4g17430.1	100	3e-69	213
TRINITY_DN1018_c1_g2	TRINITY_DN1018_c1_g2_i1	FvH4_1g24950.1	100	4e-59	197
TRINITY_DN10181_c0_g1	TRINITY_DN10181_c0_g1_i3	FvH4_2g29750.1	100	0	1025
TRINITY_DN10181_c0_g3	TRINITY_DN10181_c0_g3_i1	FvH4_7g17440.1	100	0	1077
TRINITY_DN10182_c0_g2	TRINITY_DN10182_c0_g2_i2	FvH4_4g25750.1	100	0	1628
TRINITY_DN10182_c0_g3	TRINITY_DN10182_c0_g3_i4	FvH4_3g37880.1	100	0	845
TRINITY_DN10193_c0_g1	TRINITY_DN10193_c0_g1_i7	FvH4_6g30250.1	100	0	771
TRINITY_DN10195_c0_g1	TRINITY_DN10195_c0_g1_i1	FvH4_5g22120.1	100	4e-41	140
TRINITY_DN10198_c0_g1	TRINITY_DN10198_c0_g1_i1	FvH4_4g28120.1	100	0	873
TRINITY_DN10201_c0_g1	TRINITY_DN10201_c0_g1_i2	FvH4_3g11350.1	100	0	1852
TRINITY_DN10202_c0_g1	TRINITY_DN10202_c0_g1_i2	FvH4_3g09670.1	100	6e-97	290
TRINITY_DN10204_c0_g1	TRINITY_DN10204_c0_g1_i2	FvH4_6g41100.1	100	0	1448
TRINITY_DN10205_c0_g1	TRINITY_DN10205_c0_g1_i1	FvH4_1g26980.1	100	0	563
TRINITY_DN10211_c0_g1	TRINITY_DN10211_c0_g1_i1	FvH4_6g13510.1	100	1e-63	124
TRINITY_DN10219_c0_g1	TRINITY_DN10219_c0_g1_i2	FvH4_6g20590.1	100	1e-120	363
TRINITY_DN10225_c0_g1	TRINITY_DN10225_c0_g1_i2	FvH4_5g34500.1	100	4e-85	283
TRINITY_DN10227_c0_g1	TRINITY_DN10227_c0_g1_i2	FvH4_1g17150.1	100	0	1382
TRINITY_DN10230_c0_g1	TRINITY_DN10230_c0_g1_i1	FvH4_4g22030.1	100	0	816
TRINITY_DN10231_c0_g1	TRINITY_DN10231_c0_g1_i4	FvH4_7g04090.1	100	0	534
TRINITY_DN10236_c0_g1	TRINITY_DN10236_c0_g1_i1	FvH4_2g30100.1	100	0	977
TRINITY_DN1024_c0_g2	TRINITY_DN1024_c0_g2_i1	FvH4_6g21660.1	100	2e-14	69.3
TRINITY_DN10240_c0_g1	TRINITY_DN10240_c0_g1_i1	FvH4_5g36570.1	100	0	525
TRINITY_DN10241_c0_g1	TRINITY_DN10241_c0_g1_i1	FvH4_4g07630.1	100	8e-28	110
TRINITY_DN10245_c0_g1	TRINITY_DN10245_c0_g1_i4	FvH4_2g35140.1	100	0	3776
TRINITY_DN10246_c0_g1	TRINITY_DN10246_c0_g1_i1	FvH4_7g05960.1	100	0	1002
TRINITY_DN10249_c0_g1	TRINITY_DN10249_c0_g1_i1	FvH4_6g35770.1	100	0	3571
TRINITY_DN10250_c0_g2	TRINITY_DN10250_c0_g2_i2	FvH4_1g12250.1	100	0	1030
TRINITY_DN10252_c0_g1	TRINITY_DN10252_c0_g1_i1	FvH4_6g11590.1	100	2e-131	407
TRINITY_DN10257_c0_g1	TRINITY_DN10257_c0_g1_i7	FvH4_5g09850.1	100	5e-166	493
TRINITY_DN10258_c0_g2	TRINITY_DN10258_c0_g2_i1	FvH4_4g36650.1	100	0	740
TRINITY_DN10261_c0_g1	TRINITY_DN10261_c0_g1_i1	FvH4_7g00900.1	100	1e-96	273
TRINITY_DN10266_c0_g1	TRINITY_DN10266_c0_g1_i5	FvH4_2g05630.1	100	0	780
TRINITY_DN10266_c0_g3	TRINITY_DN10266_c0_g3_i1	FvH4_3g22300.1	100	0	1119
TRINITY_DN10266_c1_g1	TRINITY_DN10266_c1_g1_i1	FvH4_6g20480.1	100	0	639
TRINITY_DN10269_c0_g2	TRINITY_DN10269_c0_g2_i1	FvH4_2g07930.1	100	0	647
TRINITY_DN10269_c0_g4	TRINITY_DN10269_c0_g4_i1	FvH4_3g37650.1	100	0	650
TRINITY_DN10281_c0_g1	TRINITY_DN10281_c0_g1_i1	FvH4_5g19030.1	100	0	581
TRINITY_DN10284_c0_g1	TRINITY_DN10284_c0_g1_i1	FvH4_3g16690.1	100	1e-56	181
TRINITY_DN10289_c0_g1	TRINITY_DN10289_c0_g1_i2	FvH4_6g52030.1	100	3e-141	387
TRINITY_DN1029_c0_g3	TRINITY_DN1029_c0_g3_i3	FvH4_3g24900.1	100	9e-138	401
TRINITY_DN1030_c0_g1	TRINITY_DN1030_c0_g1_i1	FvH4_7g03940.1	100	3e-104	320
TRINITY_DN1030_c1_g1	TRINITY_DN1030_c1_g1_i3	FvH4_7g07440.1	100	3e-80	262
TRINITY_DN1030_c1_g3	TRINITY_DN1030_c1_g3_i1	FvH4_1g15280.1	100	8e-25	97.4
TRINITY_DN10316_c0_g1	TRINITY_DN10316_c0_g1_i4	FvH4_6g36430.1	100	0	596
TRINITY_DN10318_c0_g1	TRINITY_DN10318_c0_g1_i1	FvH4_1g11320.1	100	2e-83	181
TRINITY_DN10319_c0_g1	TRINITY_DN10319_c0_g1_i1	FvH4_5g03960.1	100	3e-59	184
TRINITY_DN10323_c0_g1	TRINITY_DN10323_c0_g1_i3	FvH4_3g07430.1	100	0	586
TRINITY_DN10324_c0_g2	TRINITY_DN10324_c0_g2_i1	FvH4_7g18720.1	100	0	1877
TRINITY_DN10328_c0_g1	TRINITY_DN10328_c0_g1_i2	FvH4_3g28750.1	100	9e-84	193
TRINITY_DN10330_c0_g1	TRINITY_DN10330_c0_g1_i3	FvH4_5g37300.1	100	2e-149	432
TRINITY_DN10337_c0_g1	TRINITY_DN10337_c0_g1_i1	FvH4_5g23200.1	100	9e-170	511
TRINITY_DN10338_c0_g1	TRINITY_DN10338_c0_g1_i1	FvH4_7g24030.1	100	5e-124	359
TRINITY_DN10347_c1_g1	TRINITY_DN10347_c1_g1_i1	FvH4_6g21100.1	100	0	642
TRINITY_DN1035_c0_g1	TRINITY_DN1035_c0_g1_i1	FvH4_7g15800.1	100	0	627
TRINITY_DN10351_c0_g1	TRINITY_DN10351_c0_g1_i2	FvH4_7g27700.1	100	9e-51	167
TRINITY_DN10352_c0_g2	TRINITY_DN10352_c0_g2_i1	FvH4_3g45130.1	100	6e-126	377
TRINITY_DN1036_c0_g1	TRINITY_DN1036_c0_g1_i3	FvH4_3g45800.1	100	0	1115
TRINITY_DN1036_c3_g1	TRINITY_DN1036_c3_g1_i1	FvH4_3g04050.1	100	0	1500
TRINITY_DN10367_c0_g1	TRINITY_DN10367_c0_g1_i2	FvH4_6g11930.1	100	5e-179	538
TRINITY_DN10368_c0_g1	TRINITY_DN10368_c0_g1_i1	FvH4_7g09880.1	100	0	1214
TRINITY_DN10372_c0_g1	TRINITY_DN10372_c0_g1_i1	FvH4_6g05010.1	100	5e-21	85.5
TRINITY_DN10374_c1_g3	TRINITY_DN10374_c1_g3_i1	FvH4_2g19540.1	100	0	860
TRINITY_DN10381_c0_g1	TRINITY_DN10381_c0_g1_i1	FvH4_4g13770.1	100	0	592
TRINITY_DN10381_c1_g1	TRINITY_DN10381_c1_g1_i3	FvH4_7g06690.1	100	0	1791
TRINITY_DN10381_c1_g3	TRINITY_DN10381_c1_g3_i1	FvH4_3g19130.1	100	0	721
TRINITY_DN10384_c0_g1	TRINITY_DN10384_c0_g1_i6	FvH4_6g33040.1	100	2e-70	222
TRINITY_DN10388_c0_g1	TRINITY_DN10388_c0_g1_i1	FvH4_4g28090.1	100	0	958
TRINITY_DN1039_c0_g1	TRINITY_DN1039_c0_g1_i4	FvH4_6g26950.1	100	1e-153	469
TRINITY_DN10394_c0_g1	TRINITY_DN10394_c0_g1_i1	FvH4_1g03100.1	100	2e-57	186
TRINITY_DN10395_c0_g2	TRINITY_DN10395_c0_g2_i1	FvH4_5g22130.1	100	0	602
TRINITY_DN10397_c0_g1	TRINITY_DN10397_c0_g1_i2	FvH4_1g26310.1	100	0	639
TRINITY_DN104_c0_g1	TRINITY_DN104_c0_g1_i9	FvH4_7g02370.1	100	1e-174	540
TRINITY_DN10403_c1_g1	TRINITY_DN10403_c1_g1_i3	FvH4_3g17020.1	100	0	617
TRINITY_DN10411_c0_g1	TRINITY_DN10411_c0_g1_i1	FvH4_5g26460.1	100	0	758
TRINITY_DN10415_c0_g1	TRINITY_DN10415_c0_g1_i1	FvH4_5g20480.1	100	3e-105	330
TRINITY_DN104152_c0_g2	TRINITY_DN104152_c0_g2_i1	FvH4_3g38500.1	100	1e-12	62.4
TRINITY_DN10417_c0_g1	TRINITY_DN10417_c0_g1_i1	FvH4_5g19110.1	100	8e-109	327
TRINITY_DN10419_c0_g1	TRINITY_DN10419_c0_g1_i2	FvH4_2g10420.1	100	0	1295
TRINITY_DN1042_c2_g1	TRINITY_DN1042_c2_g1_i1	FvH4_6g29550.1	100	0	1170
TRINITY_DN10429_c0_g1	TRINITY_DN10429_c0_g1_i1	FvH4_1g01260.1	100	5e-130	377
TRINITY_DN10430_c0_g1	TRINITY_DN10430_c0_g1_i2	FvH4_3g00950.1	100	0	685
TRINITY_DN10432_c0_g2	TRINITY_DN10432_c0_g2_i6	FvH4_1g03580.1	100	0	617
TRINITY_DN10434_c0_g1	TRINITY_DN10434_c0_g1_i1	FvH4_4g13670.1	100	0	523
TRINITY_DN10437_c0_g1	TRINITY_DN10437_c0_g1_i2	FvH4_3g15890.1	100	0	1134
TRINITY_DN1044_c2_g1	TRINITY_DN1044_c2_g1_i5	FvH4_3g13940.1	100	0	634
TRINITY_DN10440_c0_g1	TRINITY_DN10440_c0_g1_i1	FvH4_2g20390.1	100	0	1266
TRINITY_DN10441_c0_g4	TRINITY_DN10441_c0_g4_i1	FvH4_5g18960.1	100	3e-39	92.8
TRINITY_DN10444_c0_g1	TRINITY_DN10444_c0_g1_i1	FvH4_5g24350.1	100	0	1122
TRINITY_DN10449_c0_g1	TRINITY_DN10449_c0_g1_i2	FvH4_3g39770.1	100	0	1073
TRINITY_DN1045_c0_g1	TRINITY_DN1045_c0_g1_i2	FvH4_1g23080.1	100	7e-101	312
TRINITY_DN10450_c0_g1	TRINITY_DN10450_c0_g1_i1	FvH4_6g53210.1	100	5e-89	268
TRINITY_DN10455_c0_g1	TRINITY_DN10455_c0_g1_i2	FvH4_6g20830.1	100	1e-137	399
TRINITY_DN10459_c0_g1	TRINITY_DN10459_c0_g1_i2	FvH4_3g06440.1	100	0	645
TRINITY_DN10461_c1_g1	TRINITY_DN10461_c1_g1_i7	FvH4_2g06320.1	100	3e-85	216
TRINITY_DN10463_c0_g1	TRINITY_DN10463_c0_g1_i1	FvH4_7g09080.1	100	0	655
TRINITY_DN10469_c0_g2	TRINITY_DN10469_c0_g2_i1	FvH4_5g20270.1	100	0	1083
TRINITY_DN1047_c0_g1	TRINITY_DN1047_c0_g1_i2	FvH4_4g25870.1	100	0	820
TRINITY_DN10478_c0_g2	TRINITY_DN10478_c0_g2_i1	FvH4_6g01390.1	100	0	751
TRINITY_DN10480_c0_g2	TRINITY_DN10480_c0_g2_i4	FvH4_2g05930.1	100	0	685
TRINITY_DN10480_c0_g3	TRINITY_DN10480_c0_g3_i2	FvH4_7g00050.1	100	1e-117	351
TRINITY_DN10481_c0_g1	TRINITY_DN10481_c0_g1_i1	FvH4_7g29010.1	100	0	622
TRINITY_DN10484_c0_g1	TRINITY_DN10484_c0_g1_i1	FvH4_1g15370.1	100	2e-33	121
TRINITY_DN10486_c0_g1	TRINITY_DN10486_c0_g1_i1	FvH4_1g05110.1	100	2e-94	286
TRINITY_DN10487_c0_g2	TRINITY_DN10487_c0_g2_i1	FvH4_1g17870.1	100	3e-34	123
TRINITY_DN10487_c0_g4	TRINITY_DN10487_c0_g4_i2	FvH4_7g15700.1	100	0	536
TRINITY_DN10487_c0_g5	TRINITY_DN10487_c0_g5_i1	FvH4_7g05630.1	100	2e-21	82.4
TRINITY_DN10490_c1_g1	TRINITY_DN10490_c1_g1_i1	FvH4_3g19680.1	100	0	1958
TRINITY_DN10493_c0_g2	TRINITY_DN10493_c0_g2_i1	FvH4_7g24140.1	100	0	1011
TRINITY_DN10494_c0_g1	TRINITY_DN10494_c0_g1_i3	FvH4_7g18310.1	100	0	563
TRINITY_DN10495_c0_g1	TRINITY_DN10495_c0_g1_i1	FvH4_6g43740.1	100	5e-94	283
TRINITY_DN10497_c0_g1	TRINITY_DN10497_c0_g1_i1	FvH4_6g00070.1	100	5e-115	334
TRINITY_DN10498_c0_g1	TRINITY_DN10498_c0_g1_i1	FvH4_6g02300.1	100	0	1434
TRINITY_DN105_c0_g4	TRINITY_DN105_c0_g4_i2	FvH4_3g04340.1	100	0	339
TRINITY_DN10505_c0_g1	TRINITY_DN10505_c0_g1_i2	FvH4_7g28050.1	100	2e-134	405
TRINITY_DN10518_c0_g1	TRINITY_DN10518_c0_g1_i1	FvH4_1g12100.1	100	0	1241
TRINITY_DN10520_c0_g1	TRINITY_DN10520_c0_g1_i4	FvH4_6g10720.1	100	0	787
TRINITY_DN10521_c0_g1	TRINITY_DN10521_c0_g1_i1	FvH4_4g27710.1	100	0	764
TRINITY_DN10525_c0_g1	TRINITY_DN10525_c0_g1_i1	FvH4_6g33360.1	100	0	1174
TRINITY_DN10527_c0_g1	TRINITY_DN10527_c0_g1_i1	FvH4_3g35990.1	100	0	1143
TRINITY_DN10528_c0_g3	TRINITY_DN10528_c0_g3_i1	FvH4_5g23400.1	100	0	1883
TRINITY_DN10529_c0_g2	TRINITY_DN10529_c0_g2_i1	FvH4_1g11140.1	100	0	1319
TRINITY_DN10530_c0_g2	TRINITY_DN10530_c0_g2_i1	FvH4_5g07600.1	100	5e-126	369
TRINITY_DN10533_c0_g1	TRINITY_DN10533_c0_g1_i1	FvH4_3g07140.1	100	0	1097
TRINITY_DN10535_c0_g1	TRINITY_DN10535_c0_g1_i1	FvH4_6g23950.1	100	4e-16	74.7
TRINITY_DN1054_c0_g1	TRINITY_DN1054_c0_g1_i9	FvH4_6g38590.1	100	0	1264
TRINITY_DN10542_c0_g1	TRINITY_DN10542_c0_g1_i1	FvH4_4g29750.1	100	4e-109	322
TRINITY_DN10546_c0_g1	TRINITY_DN10546_c0_g1_i8	FvH4_6g40690.1	100	5e-63	209
TRINITY_DN10554_c0_g2	TRINITY_DN10554_c0_g2_i2	FvH4_5g15060.1	100	0	1307
TRINITY_DN10560_c1_g1	TRINITY_DN10560_c1_g1_i1	FvH4_6g13730.1	100	0	1281
TRINITY_DN1057_c0_g1	TRINITY_DN1057_c0_g1_i1	FvH4_3g07260.1	100	0	1710
TRINITY_DN1057_c0_g2	TRINITY_DN1057_c0_g2_i2	FvH4_5g22550.1	100	0	1786
TRINITY_DN10571_c0_g1	TRINITY_DN10571_c0_g1_i1	FvH4_5g17800.1	100	1e-89	283
TRINITY_DN10573_c2_g1	TRINITY_DN10573_c2_g1_i1	FvH4_6g02160.1	100	0	704
TRINITY_DN10577_c0_g1	TRINITY_DN10577_c0_g1_i2	FvH4_5g38120.1	100	5e-99	293
TRINITY_DN10579_c0_g1	TRINITY_DN10579_c0_g1_i1	FvH4_6g35090.1	100	0	1008
TRINITY_DN10580_c0_g1	TRINITY_DN10580_c0_g1_i6	FvH4_5g19890.1	100	4e-116	370
TRINITY_DN10584_c0_g1	TRINITY_DN10584_c0_g1_i1	FvH4_2g21330.1	100	0	1456
TRINITY_DN10586_c0_g1	TRINITY_DN10586_c0_g1_i2	FvH4_1g28790.1	100	1e-175	496
TRINITY_DN10587_c0_g1	TRINITY_DN10587_c0_g1_i2	FvH4_6g17920.1	100	2e-37	129
TRINITY_DN10601_c0_g1	TRINITY_DN10601_c0_g1_i3	FvH4_5g32960.1	100	6e-83	267
TRINITY_DN106042_c0_g1	TRINITY_DN106042_c0_g1_i3	FvH4_2g09920.1	100	0	915
TRINITY_DN10609_c0_g1	TRINITY_DN10609_c0_g1_i3	FvH4_5g35450.1	100	2e-125	363
TRINITY_DN1061_c0_g1	TRINITY_DN1061_c0_g1_i5	FvH4_2g30140.1	100	0	2070
TRINITY_DN10625_c0_g1	TRINITY_DN10625_c0_g1_i2	FvH4_5g10020.1	100	0	1153
TRINITY_DN10630_c0_g1	TRINITY_DN10630_c0_g1_i2	FvH4_2g40810.1	100	2e-104	317
TRINITY_DN10631_c0_g1	TRINITY_DN10631_c0_g1_i1	FvH4_6g41260.1	100	5e-154	438
TRINITY_DN10635_c0_g1	TRINITY_DN10635_c0_g1_i2	FvH4_3g22100.1	100	0	920
TRINITY_DN10640_c0_g3	TRINITY_DN10640_c0_g3_i1	FvH4_5g17510.1	100	2e-12	62.8
TRINITY_DN10643_c1_g1	TRINITY_DN10643_c1_g1_i1	FvH4_3g42120.1	100	1e-50	164
TRINITY_DN10644_c0_g1	TRINITY_DN10644_c0_g1_i3	FvH4_2g06010.1	100	0	765
TRINITY_DN10646_c0_g1	TRINITY_DN10646_c0_g1_i4	FvH4_3g36360.1	100	7e-54	182
TRINITY_DN10649_c0_g2	TRINITY_DN10649_c0_g2_i1	FvH4_7g34300.1	100	8e-137	431
TRINITY_DN10649_c1_g1	TRINITY_DN10649_c1_g1_i6	FvH4_4g20230.1	100	2e-126	382
TRINITY_DN10662_c0_g1	TRINITY_DN10662_c0_g1_i2	FvH4_3g41300.1	100	0	1023
TRINITY_DN10663_c0_g1	TRINITY_DN10663_c0_g1_i2	FvH4_6g06250.1	100	0	886
TRINITY_DN10669_c0_g1	TRINITY_DN10669_c0_g1_i1	FvH4_7g25200.1	100	0	679
TRINITY_DN1067_c0_g1	TRINITY_DN1067_c0_g1_i7	FvH4_7g26640.1	100	0	1021
TRINITY_DN10672_c0_g1	TRINITY_DN10672_c0_g1_i2	FvH4_6g31600.1	100	7e-54	180
TRINITY_DN10672_c0_g2	TRINITY_DN10672_c0_g2_i2	FvH4_7g17200.1	100	6e-24	99.8
TRINITY_DN10673_c0_g1	TRINITY_DN10673_c0_g1_i2	FvH4_5g04840.1	100	2e-141	419
TRINITY_DN10675_c0_g1	TRINITY_DN10675_c0_g1_i1	FvH4_6g15660.1	100	0	518
TRINITY_DN10677_c0_g1	TRINITY_DN10677_c0_g1_i1	FvH4_5g31870.1	100	2e-61	196
TRINITY_DN106798_c0_g1	TRINITY_DN106798_c0_g1_i1	FvH4_6g45950.1	100	6e-74	222
TRINITY_DN10685_c0_g2	TRINITY_DN10685_c0_g2_i1	FvH4_5g18660.1	100	4e-19	77.4
TRINITY_DN10693_c0_g1	TRINITY_DN10693_c0_g1_i1	FvH4_3g20040.1	100	0	1715
TRINITY_DN107_c0_g2	TRINITY_DN107_c0_g2_i5	FvH4_3g07760.1	100	2e-136	421
TRINITY_DN107_c3_g1	TRINITY_DN107_c3_g1_i2	FvH4_3g25110.1	100	0	628
TRINITY_DN1070_c0_g2	TRINITY_DN1070_c0_g2_i1	FvH4_4g29700.1	100	0	2330
TRINITY_DN1070_c0_g3	TRINITY_DN1070_c0_g3_i1	FvH4_4g01620.1	100	0	2192
TRINITY_DN10717_c0_g1	TRINITY_DN10717_c0_g1_i1	FvH4_5g03970.1	100	0	671
TRINITY_DN10722_c0_g1	TRINITY_DN10722_c0_g1_i1	FvH4_4g17620.1	100	0	927
TRINITY_DN10725_c0_g1	TRINITY_DN10725_c0_g1_i1	FvH4_7g27970.1	100	0	593
TRINITY_DN10728_c0_g1	TRINITY_DN10728_c0_g1_i1	FvH4_2g35040.1	100	2e-151	439
TRINITY_DN10730_c0_g1	TRINITY_DN10730_c0_g1_i3	FvH4_2g29440.1	100	2e-53	118
TRINITY_DN10731_c0_g1	TRINITY_DN10731_c0_g1_i1	FvH4_5g05470.1	100	0	1943
TRINITY_DN10734_c0_g1	TRINITY_DN10734_c0_g1_i1	FvH4_4g14480.1	100	1e-19	86.7
TRINITY_DN10735_c0_g1	TRINITY_DN10735_c0_g1_i2	FvH4_3g43490.1	100	0	855
TRINITY_DN10739_c0_g1	TRINITY_DN10739_c0_g1_i1	FvH4_3g25450.1	100	0	823
TRINITY_DN10743_c0_g1	TRINITY_DN10743_c0_g1_i1	FvH4_1g15940.1	100	0	1025
TRINITY_DN10757_c0_g1	TRINITY_DN10757_c0_g1_i4	FvH4_6g53930.1	100	2e-121	358
TRINITY_DN10766_c0_g1	TRINITY_DN10766_c0_g1_i2	FvH4_7g19440.1	100	1e-116	348
TRINITY_DN10775_c0_g1	TRINITY_DN10775_c0_g1_i6	FvH4_6g06920.1	100	2e-60	202
TRINITY_DN10776_c0_g1	TRINITY_DN10776_c0_g1_i1	FvH4_5g05510.1	100	0	998
TRINITY_DN10778_c0_g1	TRINITY_DN10778_c0_g1_i2	FvH4_5g32010.1	100	0	1664
TRINITY_DN10779_c0_g2	TRINITY_DN10779_c0_g2_i1	FvH4_4g23830.1	100	1e-125	361
TRINITY_DN1078_c0_g1	TRINITY_DN1078_c0_g1_i9	FvH4_6g15070.1	100	0	596
TRINITY_DN10789_c0_g1	TRINITY_DN10789_c0_g1_i1	FvH4_3g39820.1	100	4e-71	223
TRINITY_DN1079_c0_g1	TRINITY_DN1079_c0_g1_i1	FvH4_5g05290.1	100	0	610
TRINITY_DN10790_c0_g1	TRINITY_DN10790_c0_g1_i3	FvH4_2g15130.1	100	4e-110	328
TRINITY_DN10799_c0_g1	TRINITY_DN10799_c0_g1_i2	FvH4_5g24670.1	100	0	680
TRINITY_DN108_c0_g1	TRINITY_DN108_c0_g1_i4	FvH4_7g06070.1	100	3e-154	471
TRINITY_DN108_c0_g3	TRINITY_DN108_c0_g3_i2	FvH4_2g25230.1	100	0	910
TRINITY_DN10804_c0_g1	TRINITY_DN10804_c0_g1_i1	FvH4_7g14000.1	100	0	1205
TRINITY_DN10816_c0_g1	TRINITY_DN10816_c0_g1_i2	FvH4_6g32430.1	100	0	1288
TRINITY_DN10819_c0_g1	TRINITY_DN10819_c0_g1_i1	FvH4_2g28830.1	100	0	774
TRINITY_DN10822_c0_g2	TRINITY_DN10822_c0_g2_i1	FvH4_2g23740.1	100	0	721
TRINITY_DN10826_c0_g1	TRINITY_DN10826_c0_g1_i1	FvH4_2g30070.1	100	0	809
TRINITY_DN10827_c0_g1	TRINITY_DN10827_c0_g1_i3	FvH4_6g10460.1	100	0	990
TRINITY_DN10829_c0_g1	TRINITY_DN10829_c0_g1_i1	FvH4_4g04740.1	100	7e-157	447
TRINITY_DN10833_c0_g1	TRINITY_DN10833_c0_g1_i2	FvH4_4g05190.1	100	9e-140	423
TRINITY_DN10836_c0_g1	TRINITY_DN10836_c0_g1_i3	FvH4_3g39150.1	100	2e-110	325
TRINITY_DN10838_c0_g1	TRINITY_DN10838_c0_g1_i4	FvH4_2g14910.1	100	0	1163
TRINITY_DN10841_c3_g1	TRINITY_DN10841_c3_g1_i1	FvH4_2g04770.1	100	2e-138	406
TRINITY_DN10845_c0_g1	TRINITY_DN10845_c0_g1_i4	FvH4_1g21250.1	100	0	1011
TRINITY_DN10846_c0_g1	TRINITY_DN10846_c0_g1_i3	FvH4_5g03930.1	100	9e-125	362
TRINITY_DN10847_c0_g1	TRINITY_DN10847_c0_g1_i1	FvH4_4g25940.1	100	3e-151	441
TRINITY_DN10848_c0_g1	TRINITY_DN10848_c0_g1_i2	FvH4_3g07910.1	100	0	1353
TRINITY_DN10852_c0_g1	TRINITY_DN10852_c0_g1_i1	FvH4_2g22890.1	100	3e-129	388
TRINITY_DN10862_c0_g1	TRINITY_DN10862_c0_g1_i3	FvH4_4g13220.1	100	0	1051
TRINITY_DN1087_c0_g2	TRINITY_DN1087_c0_g2_i1	FvH4_3g36720.1	100	0	1304
TRINITY_DN10871_c0_g1	TRINITY_DN10871_c0_g1_i1	FvH4_5g30840.1	100	0	926
TRINITY_DN10871_c0_g2	TRINITY_DN10871_c0_g2_i2	FvH4_4g32990.1	100	0	1139
TRINITY_DN10881_c0_g3	TRINITY_DN10881_c0_g3_i1	FvH4_7g26070.1	100	2e-100	300
TRINITY_DN10887_c0_g1	TRINITY_DN10887_c0_g1_i1	FvH4_6g19700.1	100	0	852
TRINITY_DN10888_c0_g1	TRINITY_DN10888_c0_g1_i2	FvH4_5g00260.1	100	0	899
TRINITY_DN10889_c0_g1	TRINITY_DN10889_c0_g1_i1	FvH4_7g16030.1	100	0	660
TRINITY_DN1089_c0_g1	TRINITY_DN1089_c0_g1_i3	FvH4_6g34360.1	100	1e-106	342
TRINITY_DN10905_c0_g1	TRINITY_DN10905_c0_g1_i1	FvH4_7g34000.1	100	0	1712
TRINITY_DN1091_c0_g1	TRINITY_DN1091_c0_g1_i1	FvH4_5g33590.1	100	0	1697
TRINITY_DN10912_c1_g1	TRINITY_DN10912_c1_g1_i1	FvH4_5g23360.1	100	4e-22	86.7
TRINITY_DN109120_c0_g1	TRINITY_DN109120_c0_g1_i1	FvH4_5g24880.1	100	2e-64	200
TRINITY_DN109152_c0_g1	TRINITY_DN109152_c0_g1_i2	FvH4_4g04060.1	100	2e-32	117
TRINITY_DN10919_c1_g2	TRINITY_DN10919_c1_g2_i1	FvH4_2g13900.1	100	7e-84	254
TRINITY_DN10919_c1_g4	TRINITY_DN10919_c1_g4_i1	FvH4_3g26160.1	100	8e-95	285
TRINITY_DN1092_c0_g2	TRINITY_DN1092_c0_g2_i8	FvH4_1g20910.1	100	0	780
TRINITY_DN10922_c0_g1	TRINITY_DN10922_c0_g1_i1	FvH4_2g14670.1	100	1e-82	256
TRINITY_DN10923_c0_g1	TRINITY_DN10923_c0_g1_i1	FvH4_4g09780.1	100	0	1778
TRINITY_DN10929_c0_g2	TRINITY_DN10929_c0_g2_i2	FvH4_c1g00290.1	100	1e-53	186
TRINITY_DN10930_c0_g1	TRINITY_DN10930_c0_g1_i2	FvH4_5g06640.1	100	0	1140
TRINITY_DN10933_c0_g1	TRINITY_DN10933_c0_g1_i4	FvH4_5g12620.1	100	0	1513
TRINITY_DN10935_c0_g3	TRINITY_DN10935_c0_g3_i1	FvH4_4g14170.1	100	0	705
TRINITY_DN10937_c0_g1	TRINITY_DN10937_c0_g1_i1	FvH4_7g13250.1	100	4e-86	173
TRINITY_DN1094_c0_g3	TRINITY_DN1094_c0_g3_i1	FvH4_3g26300.1	100	0	1760
TRINITY_DN10943_c0_g2	TRINITY_DN10943_c0_g2_i1	FvH4_4g24410.1	100	0	1337
TRINITY_DN10946_c0_g2	TRINITY_DN10946_c0_g2_i2	FvH4_6g05530.1	100	0	740
TRINITY_DN10946_c0_g3	TRINITY_DN10946_c0_g3_i1	FvH4_2g29470.1	100	0	954
TRINITY_DN10948_c0_g1	TRINITY_DN10948_c0_g1_i3	FvH4_6g31160.1	100	0	1338
TRINITY_DN10950_c0_g1	TRINITY_DN10950_c0_g1_i1	FvH4_7g21020.1	100	0	975
TRINITY_DN10954_c0_g2	TRINITY_DN10954_c0_g2_i3	FvH4_6g09820.1	100	3e-175	513
TRINITY_DN1096_c2_g1	TRINITY_DN1096_c2_g1_i1	FvH4_6g14930.1	100	3e-92	286
TRINITY_DN10961_c0_g1	TRINITY_DN10961_c0_g1_i1	FvH4_5g27150.1	100	0	1430
TRINITY_DN10962_c0_g1	TRINITY_DN10962_c0_g1_i4	FvH4_2g29980.1	100	0	675
TRINITY_DN10968_c0_g1	TRINITY_DN10968_c0_g1_i2	FvH4_6g53310.1	100	0	963
TRINITY_DN10969_c0_g1	TRINITY_DN10969_c0_g1_i2	FvH4_6g02330.1	100	6e-113	339
TRINITY_DN1097_c0_g1	TRINITY_DN1097_c0_g1_i1	FvH4_4g18870.1	100	0	722
TRINITY_DN10970_c0_g3	TRINITY_DN10970_c0_g3_i1	FvH4_2g10260.1	100	1e-153	445
TRINITY_DN10971_c0_g1	TRINITY_DN10971_c0_g1_i3	FvH4_4g10650.1	100	6e-95	294
TRINITY_DN10973_c0_g2	TRINITY_DN10973_c0_g2_i1	FvH4_6g20890.1	100	1e-146	426
TRINITY_DN10975_c0_g1	TRINITY_DN10975_c0_g1_i3	FvH4_3g36490.1	100	2e-27	109
TRINITY_DN10976_c0_g1	TRINITY_DN10976_c0_g1_i1	FvH4_2g10690.1	100	0	1449
TRINITY_DN10979_c0_g1	TRINITY_DN10979_c0_g1_i1	FvH4_5g03260.1	100	0	664
TRINITY_DN10979_c0_g2	TRINITY_DN10979_c0_g2_i2	FvH4_6g09230.1	100	2e-174	502
TRINITY_DN10982_c0_g1	TRINITY_DN10982_c0_g1_i1	FvH4_2g07430.1	100	0	923
TRINITY_DN1099_c0_g1	TRINITY_DN1099_c0_g1_i5	FvH4_1g13070.1	100	0	562
TRINITY_DN10990_c0_g1	TRINITY_DN10990_c0_g1_i1	FvH4_6g07750.1	100	8e-23	89.4
TRINITY_DN10996_c0_g1	TRINITY_DN10996_c0_g1_i1	FvH4_7g01760.1	100	0	989
TRINITY_DN11_c0_g2	TRINITY_DN11_c0_g2_i2	FvH4_6g31340.1	100	9e-96	305
TRINITY_DN11_c0_g3	TRINITY_DN11_c0_g3_i3	FvH4_2g19330.1	100	0	715
TRINITY_DN11_c1_g2	TRINITY_DN11_c1_g2_i1	FvH4_3g05550.1	100	0	558
TRINITY_DN11_c3_g2	TRINITY_DN11_c3_g2_i2	FvH4_3g11310.1	100	2e-16	71.6
TRINITY_DN110_c0_g2	TRINITY_DN110_c0_g2_i1	FvH4_6g06350.1	100	0	782
TRINITY_DN110_c0_g3	TRINITY_DN110_c0_g3_i2	FvH4_6g06370.1	100	4e-143	438
TRINITY_DN11000_c0_g1	TRINITY_DN11000_c0_g1_i1	FvH4_6g16640.1	100	0	861
TRINITY_DN11007_c0_g1	TRINITY_DN11007_c0_g1_i2	FvH4_7g33330.1	100	5e-164	470
TRINITY_DN11008_c0_g1	TRINITY_DN11008_c0_g1_i1	FvH4_1g16150.1	100	0	675
TRINITY_DN11009_c0_g1	TRINITY_DN11009_c0_g1_i1	FvH4_3g21540.1	100	1e-80	251
TRINITY_DN11011_c0_g1	TRINITY_DN11011_c0_g1_i1	FvH4_4g14370.1	100	0	782
TRINITY_DN11013_c0_g1	TRINITY_DN11013_c0_g1_i2	FvH4_7g07900.1	100	0	974
TRINITY_DN110206_c0_g1	TRINITY_DN110206_c0_g1_i1	FvH4_7g26450.1	100	0	738
TRINITY_DN11023_c0_g2	TRINITY_DN11023_c0_g2_i1	FvH4_3g18610.1	100	3e-105	335
TRINITY_DN11027_c0_g1	TRINITY_DN11027_c0_g1_i1	FvH4_7g19750.1	100	6e-169	476
TRINITY_DN11030_c0_g1	TRINITY_DN11030_c0_g1_i3	FvH4_1g06670.1	100	0	918
TRINITY_DN11031_c0_g1	TRINITY_DN11031_c0_g1_i1	FvH4_1g07430.1	100	8e-142	421
TRINITY_DN11032_c0_g1	TRINITY_DN11032_c0_g1_i1	FvH4_6g24210.1	100	0	699
TRINITY_DN11034_c0_g1	TRINITY_DN11034_c0_g1_i1	FvH4_7g10680.1	100	1e-133	421
TRINITY_DN11036_c1_g1	TRINITY_DN11036_c1_g1_i1	FvH4_2g04910.1	100	3e-150	427
TRINITY_DN1104_c0_g1	TRINITY_DN1104_c0_g1_i5	FvH4_4g24830.1	100	1e-136	417
TRINITY_DN11041_c0_g1	TRINITY_DN11041_c0_g1_i1	FvH4_6g35110.1	100	0	1067
TRINITY_DN11045_c0_g1	TRINITY_DN11045_c0_g1_i2	FvH4_6g27780.1	100	0	1232
TRINITY_DN11048_c0_g1	TRINITY_DN11048_c0_g1_i1	FvH4_6g02520.1	100	3e-162	462
TRINITY_DN11049_c0_g1	TRINITY_DN11049_c0_g1_i1	FvH4_6g37030.1	100	2e-26	106
TRINITY_DN1105_c0_g1	TRINITY_DN1105_c0_g1_i3	FvH4_6g15730.1	100	9e-32	106
TRINITY_DN11054_c0_g1	TRINITY_DN11054_c0_g1_i1	FvH4_4g24550.1	100	0	912
TRINITY_DN1106_c0_g1	TRINITY_DN1106_c0_g1_i4	FvH4_7g26280.1	100	1e-29	90.1
TRINITY_DN11067_c0_g1	TRINITY_DN11067_c0_g1_i1	FvH4_6g30610.1	100	0	675
TRINITY_DN110675_c0_g1	TRINITY_DN110675_c0_g1_i1	FvH4_4g28750.1	100	4e-31	111
TRINITY_DN11073_c0_g1	TRINITY_DN11073_c0_g1_i3	FvH4_5g25890.1	100	0	1553
TRINITY_DN11074_c0_g1	TRINITY_DN11074_c0_g1_i2	FvH4_6g45640.1	100	0	891
TRINITY_DN11088_c1_g1	TRINITY_DN11088_c1_g1_i1	FvH4_6g20500.1	100	0	650
TRINITY_DN1109_c0_g1	TRINITY_DN1109_c0_g1_i2	FvH4_1g04150.1	100	0	754
TRINITY_DN1109_c2_g1	TRINITY_DN1109_c2_g1_i3	FvH4_6g52710.1	100	0	906
TRINITY_DN11094_c0_g1	TRINITY_DN11094_c0_g1_i1	FvH4_2g36110.1	100	6e-159	465
TRINITY_DN11096_c0_g1	TRINITY_DN11096_c0_g1_i5	FvH4_2g04300.1	100	1e-110	353
TRINITY_DN11097_c0_g1	TRINITY_DN11097_c0_g1_i4	FvH4_6g14970.1	100	4e-172	485
TRINITY_DN111_c0_g2	TRINITY_DN111_c0_g2_i1	FvH4_3g13410.1	100	0	1633
TRINITY_DN1110_c1_g2	TRINITY_DN1110_c1_g2_i1	FvH4_2g25920.1	100	2e-131	381
TRINITY_DN1110_c3_g1	TRINITY_DN1110_c3_g1_i1	FvH4_5g22880.1	100	3e-84	252
TRINITY_DN11100_c0_g1	TRINITY_DN11100_c0_g1_i3	FvH4_4g32790.1	100	3e-84	275
TRINITY_DN11105_c0_g1	TRINITY_DN11105_c0_g1_i1	FvH4_6g21580.1	100	0	823
TRINITY_DN11108_c0_g1	TRINITY_DN11108_c0_g1_i3	FvH4_3g26670.1	100	0	651
TRINITY_DN11114_c0_g1	TRINITY_DN11114_c0_g1_i1	FvH4_5g36850.1	100	0	628
TRINITY_DN11115_c0_g1	TRINITY_DN11115_c0_g1_i2	FvH4_7g06790.1	100	2e-51	172
TRINITY_DN11116_c0_g1	TRINITY_DN11116_c0_g1_i2	FvH4_2g26800.1	100	0	542
TRINITY_DN11119_c0_g1	TRINITY_DN11119_c0_g1_i1	FvH4_6g12700.1	100	0	975
TRINITY_DN11121_c0_g1	TRINITY_DN11121_c0_g1_i1	FvH4_7g02860.1	100	0	529
TRINITY_DN11130_c0_g1	TRINITY_DN11130_c0_g1_i1	FvH4_3g40240.1	100	3e-56	180
TRINITY_DN11133_c0_g1	TRINITY_DN11133_c0_g1_i1	FvH4_6g38270.1	100	0	1016
TRINITY_DN11134_c0_g1	TRINITY_DN11134_c0_g1_i1	FvH4_4g01940.1	100	4e-77	254
TRINITY_DN11138_c0_g1	TRINITY_DN11138_c0_g1_i4	FvH4_2g13640.1	100	7e-130	400
TRINITY_DN11145_c0_g1	TRINITY_DN11145_c0_g1_i1	FvH4_6g38260.1	100	0	664
TRINITY_DN11148_c0_g1	TRINITY_DN11148_c0_g1_i3	FvH4_6g45440.1	100	1e-150	431
TRINITY_DN11151_c0_g1	TRINITY_DN11151_c0_g1_i1	FvH4_7g11280.1	100	7e-112	340
TRINITY_DN11156_c0_g1	TRINITY_DN11156_c0_g1_i1	FvH4_5g22510.1	100	0	646
TRINITY_DN11164_c0_g2	TRINITY_DN11164_c0_g2_i1	FvH4_5g16150.1	100	8e-86	270
TRINITY_DN11166_c0_g1	TRINITY_DN11166_c0_g1_i1	FvH4_7g02030.1	100	0	784
TRINITY_DN11167_c1_g1	TRINITY_DN11167_c1_g1_i7	FvH4_1g15150.1	100	0	547
TRINITY_DN11168_c1_g2	TRINITY_DN11168_c1_g2_i1	FvH4_5g05650.1	100	0	989
TRINITY_DN11172_c0_g1	TRINITY_DN11172_c0_g1_i4	FvH4_7g29130.1	100	0	1530
TRINITY_DN11173_c0_g1	TRINITY_DN11173_c0_g1_i1	FvH4_3g05470.1	100	4e-52	165
TRINITY_DN111737_c0_g1	TRINITY_DN111737_c0_g1_i2	FvH4_2g38220.1	100	0	926
TRINITY_DN11176_c0_g1	TRINITY_DN11176_c0_g1_i2	FvH4_6g08770.1	100	4e-78	255
TRINITY_DN111768_c0_g1	TRINITY_DN111768_c0_g1_i1	FvH4_1g16520.1	100	6e-28	103
TRINITY_DN11178_c0_g1	TRINITY_DN11178_c0_g1_i2	FvH4_7g29150.1	100	1e-122	355
TRINITY_DN1118_c0_g2	TRINITY_DN1118_c0_g2_i1	FvH4_3g01120.1	100	6e-113	344
TRINITY_DN11183_c0_g1	TRINITY_DN11183_c0_g1_i1	FvH4_7g23760.1	100	1e-132	384
TRINITY_DN11187_c0_g1	TRINITY_DN11187_c0_g1_i4	FvH4_6g22550.1	100	0	638
TRINITY_DN11187_c1_g1	TRINITY_DN11187_c1_g1_i1	FvH4_3g08010.1	100	0	906
TRINITY_DN11199_c0_g1	TRINITY_DN11199_c0_g1_i2	FvH4_6g35720.1	100	9e-89	212
TRINITY_DN11204_c0_g1	TRINITY_DN11204_c0_g1_i1	FvH4_6g18530.1	100	2e-52	166
TRINITY_DN11208_c0_g2	TRINITY_DN11208_c0_g2_i1	FvH4_5g06760.1	100	4e-147	428
TRINITY_DN11209_c0_g1	TRINITY_DN11209_c0_g1_i1	FvH4_7g29890.1	100	0	599
TRINITY_DN1121_c0_g1	TRINITY_DN1121_c0_g1_i2	FvH4_2g14020.1	100	2e-102	333
TRINITY_DN11213_c0_g1	TRINITY_DN11213_c0_g1_i2	FvH4_7g11110.1	100	0	650
TRINITY_DN11215_c0_g1	TRINITY_DN11215_c0_g1_i1	FvH4_6g37630.1	100	0	742
TRINITY_DN11216_c0_g1	TRINITY_DN11216_c0_g1_i2	FvH4_5g09480.1	100	0	1039
TRINITY_DN11218_c0_g1	TRINITY_DN11218_c0_g1_i1	FvH4_3g44360.1	100	0	709
TRINITY_DN1122_c0_g1	TRINITY_DN1122_c0_g1_i1	FvH4_3g09030.1	100	4e-87	281
TRINITY_DN11221_c1_g3	TRINITY_DN11221_c1_g3_i1	FvH4_3g40140.1	100	1e-140	400
TRINITY_DN11230_c0_g1	TRINITY_DN11230_c0_g1_i5	FvH4_7g32020.1	100	4e-66	215
TRINITY_DN11234_c0_g1	TRINITY_DN11234_c0_g1_i1	FvH4_4g21490.1	100	1e-135	392
TRINITY_DN1124_c0_g1	TRINITY_DN1124_c0_g1_i3	FvH4_3g42450.1	100	0	720
TRINITY_DN1124_c0_g2	TRINITY_DN1124_c0_g2_i1	FvH4_3g03900.1	100	0	947
TRINITY_DN1124_c0_g4	TRINITY_DN1124_c0_g4_i1	FvH4_3g42360.1	100	0	826
TRINITY_DN11240_c0_g2	TRINITY_DN11240_c0_g2_i1	FvH4_1g11160.1	100	4e-157	444
TRINITY_DN11245_c0_g1	TRINITY_DN11245_c0_g1_i2	FvH4_2g18080.1	100	5e-161	461
TRINITY_DN11248_c0_g1	TRINITY_DN11248_c0_g1_i3	FvH4_2g16050.1	100	0	623
TRINITY_DN1125_c0_g2	TRINITY_DN1125_c0_g2_i2	FvH4_3g13890.1	100	1e-175	512
TRINITY_DN1125_c0_g3	TRINITY_DN1125_c0_g3_i1	FvH4_3g13300.1	100	0	647
TRINITY_DN1125_c1_g1	TRINITY_DN1125_c1_g1_i2	FvH4_1g28690.1	100	3e-84	262
TRINITY_DN1125_c4_g1	TRINITY_DN1125_c4_g1_i1	FvH4_1g17140.1	100	6e-30	111
TRINITY_DN11250_c0_g1	TRINITY_DN11250_c0_g1_i1	FvH4_2g13410.1	100	1e-38	140
TRINITY_DN11251_c0_g1	TRINITY_DN11251_c0_g1_i1	FvH4_4g28190.1	100	5e-77	235
TRINITY_DN11254_c0_g1	TRINITY_DN11254_c0_g1_i1	FvH4_1g23130.1	100	0	2205
TRINITY_DN11259_c0_g1	TRINITY_DN11259_c0_g1_i4	FvH4_6g44850.1	100	7e-14	68.6
TRINITY_DN1126_c0_g1	TRINITY_DN1126_c0_g1_i1	FvH4_1g00330.1	100	0	769
TRINITY_DN11263_c0_g1	TRINITY_DN11263_c0_g1_i1	FvH4_2g25850.1	100	6e-152	436
TRINITY_DN11266_c0_g1	TRINITY_DN11266_c0_g1_i1	FvH4_7g09120.1	100	0	989
TRINITY_DN11267_c0_g3	TRINITY_DN11267_c0_g3_i2	FvH4_6g08030.1	100	3e-97	298
TRINITY_DN11267_c1_g1	TRINITY_DN11267_c1_g1_i1	FvH4_7g24400.1	100	1e-150	459
TRINITY_DN11271_c0_g1	TRINITY_DN11271_c0_g1_i1	FvH4_7g09180.1	100	0	775
TRINITY_DN11273_c0_g1	TRINITY_DN11273_c0_g1_i1	FvH4_2g19750.1	100	0	839
TRINITY_DN11279_c0_g1	TRINITY_DN11279_c0_g1_i1	FvH4_6g07510.1	100	0	1088
TRINITY_DN11284_c0_g1	TRINITY_DN11284_c0_g1_i2	FvH4_2g30040.1	100	0	737
TRINITY_DN1129_c0_g1	TRINITY_DN1129_c0_g1_i5	FvH4_5g14940.1	100	0	660
TRINITY_DN11293_c0_g2	TRINITY_DN11293_c0_g2_i5	FvH4_7g18690.1	100	0	982
TRINITY_DN11298_c0_g1	TRINITY_DN11298_c0_g1_i2	FvH4_4g18580.1	100	6e-156	444
TRINITY_DN113_c0_g1	TRINITY_DN113_c0_g1_i1	FvH4_3g15980.1	100	0	1622
TRINITY_DN113_c0_g2	TRINITY_DN113_c0_g2_i1	FvH4_3g21400.1	100	0	1337
TRINITY_DN113_c1_g1	TRINITY_DN113_c1_g1_i6	FvH4_6g31370.1	100	0	729
TRINITY_DN113_c4_g1	TRINITY_DN113_c4_g1_i1	FvH4_7g26920.1	100	4e-172	496
TRINITY_DN11302_c0_g1	TRINITY_DN11302_c0_g1_i1	FvH4_1g02430.1	100	0	646
TRINITY_DN11305_c0_g2	TRINITY_DN11305_c0_g2_i3	FvH4_1g04570.1	100	0	1412
TRINITY_DN11311_c0_g2	TRINITY_DN11311_c0_g2_i1	FvH4_5g09610.1	100	2e-34	125
TRINITY_DN11312_c0_g2	TRINITY_DN11312_c0_g2_i4	FvH4_3g26230.1	100	1e-16	77.8
TRINITY_DN11313_c0_g2	TRINITY_DN11313_c0_g2_i3	FvH4_3g04990.1	100	0	1188
TRINITY_DN11313_c1_g2	TRINITY_DN11313_c1_g2_i2	FvH4_4g35530.1	100	4e-176	511
TRINITY_DN1133_c0_g13	TRINITY_DN1133_c0_g1_i13	FvH4_3g45920.1	100	2e-180	553
TRINITY_DN1133_c1_g1	TRINITY_DN1133_c1_g1_i5	FvH4_4g11600.1	100	0	657
TRINITY_DN1133_c2_g1	TRINITY_DN1133_c2_g1_i3	FvH4_3g39130.1	100	3e-68	229
TRINITY_DN113313_c1_g1	TRINITY_DN113313_c1_g1_i1	FvH4_6g16340.1	100	2e-119	339
TRINITY_DN11338_c0_g1	TRINITY_DN11338_c0_g1_i1	FvH4_4g25450.1	100	0	991
TRINITY_DN11344_c0_g1	TRINITY_DN11344_c0_g1_i1	FvH4_5g13270.1	100	0	776
TRINITY_DN11345_c0_g1	TRINITY_DN11345_c0_g1_i3	FvH4_3g04650.1	100	0	1573
TRINITY_DN11345_c1_g1	TRINITY_DN11345_c1_g1_i2	FvH4_6g39500.1	100	1e-111	343
TRINITY_DN11352_c0_g1	TRINITY_DN11352_c0_g1_i4	FvH4_6g48970.1	100	5e-44	151
TRINITY_DN11355_c0_g1	TRINITY_DN11355_c0_g1_i1	FvH4_3g37770.1	100	0	728
TRINITY_DN11360_c0_g1	TRINITY_DN11360_c0_g1_i2	FvH4_6g14160.1	100	0	746
TRINITY_DN11367_c0_g1	TRINITY_DN11367_c0_g1_i4	FvH4_6g16440.1	100	2e-79	249
TRINITY_DN11373_c0_g1	TRINITY_DN11373_c0_g1_i4	FvH4_5g10750.1	100	2e-139	422
TRINITY_DN11374_c0_g1	TRINITY_DN11374_c0_g1_i1	FvH4_3g11410.1	100	4e-121	348
TRINITY_DN1138_c0_g3	TRINITY_DN1138_c0_g3_i2	FvH4_2g08450.1	100	4e-82	260
TRINITY_DN11381_c0_g1	TRINITY_DN11381_c0_g1_i1	FvH4_6g01530.1	100	0	1004
TRINITY_DN11384_c0_g1	TRINITY_DN11384_c0_g1_i2	FvH4_2g27460.1	100	1e-106	323
TRINITY_DN11389_c0_g1	TRINITY_DN11389_c0_g1_i1	FvH4_4g14440.1	100	0	707
TRINITY_DN11390_c0_g1	TRINITY_DN11390_c0_g1_i3	FvH4_7g26250.1	100	8e-122	364
TRINITY_DN11394_c0_g1	TRINITY_DN11394_c0_g1_i4	FvH4_3g21450.1	100	0	734
TRINITY_DN11395_c0_g21	TRINITY_DN11395_c0_g2_i11	FvH4_6g22960.1	100	1e-32	123
TRINITY_DN11402_c1_g2	TRINITY_DN11402_c1_g2_i6	FvH4_6g22830.1	100	1e-40	137
TRINITY_DN11403_c0_g2	TRINITY_DN11403_c0_g2_i1	FvH4_7g08760.1	100	6e-85	260
TRINITY_DN11408_c0_g1	TRINITY_DN11408_c0_g1_i3	FvH4_6g45970.1	100	0	815
TRINITY_DN1141_c0_g1	TRINITY_DN1141_c0_g1_i8	FvH4_5g24020.1	100	0	1666
TRINITY_DN1141_c1_g2	TRINITY_DN1141_c1_g2_i1	FvH4_3g13020.1	100	2e-165	486
TRINITY_DN11414_c0_g1	TRINITY_DN11414_c0_g1_i2	FvH4_3g28970.1	100	5e-38	142
TRINITY_DN11414_c0_g2	TRINITY_DN11414_c0_g2_i5	FvH4_7g03530.1	100	5e-127	394
TRINITY_DN11414_c0_g5	TRINITY_DN11414_c0_g5_i1	FvH4_3g25200.1	100	0	731
TRINITY_DN11416_c0_g1	TRINITY_DN11416_c0_g1_i1	FvH4_6g20400.1	100	0	778
TRINITY_DN11418_c0_g1	TRINITY_DN11418_c0_g1_i2	FvH4_3g21040.1	100	0	1311
TRINITY_DN11419_c0_g1	TRINITY_DN11419_c0_g1_i2	FvH4_7g30450.1	100	0	609
TRINITY_DN11421_c0_g1	TRINITY_DN11421_c0_g1_i1	FvH4_6g15970.1	100	0	568
TRINITY_DN11423_c0_g2	TRINITY_DN11423_c0_g2_i1	FvH4_2g21350.1	100	0	690
TRINITY_DN11425_c0_g2	TRINITY_DN11425_c0_g2_i1	FvH4_3g43270.1	100	0	737
TRINITY_DN11426_c0_g1	TRINITY_DN11426_c0_g1_i3	FvH4_5g35970.1	100	0	914
TRINITY_DN1143_c0_g1	TRINITY_DN1143_c0_g1_i5	FvH4_5g02930.1	100	0	1174
TRINITY_DN11437_c1_g1	TRINITY_DN11437_c1_g1_i1	FvH4_5g00970.1	100	0	1712
TRINITY_DN11438_c0_g1	TRINITY_DN11438_c0_g1_i2	FvH4_2g41310.1	100	0	746
TRINITY_DN11445_c0_g1	TRINITY_DN11445_c0_g1_i1	FvH4_3g19330.1	100	0	697
TRINITY_DN11454_c0_g1	TRINITY_DN11454_c0_g1_i1	FvH4_4g15080.1	100	7e-163	475
TRINITY_DN11459_c0_g1	TRINITY_DN11459_c0_g1_i2	FvH4_4g04100.1	100	2e-78	247
TRINITY_DN1146_c0_g1	TRINITY_DN1146_c0_g1_i3	FvH4_1g27060.1	100	0	2256
TRINITY_DN11460_c0_g1	TRINITY_DN11460_c0_g1_i6	FvH4_5g26100.1	100	6e-176	499
TRINITY_DN11465_c0_g1	TRINITY_DN11465_c0_g1_i2	FvH4_7g25380.1	100	0	813
TRINITY_DN11472_c0_g1	TRINITY_DN11472_c0_g1_i2	FvH4_4g07750.1	100	0	642
TRINITY_DN11479_c0_g1	TRINITY_DN11479_c0_g1_i4	FvH4_3g27850.1	100	0	1050
TRINITY_DN1148_c0_g1	TRINITY_DN1148_c0_g1_i2	FvH4_6g25420.1	100	5e-27	107
TRINITY_DN11481_c0_g1	TRINITY_DN11481_c0_g1_i1	FvH4_4g20710.1	100	0	1246
TRINITY_DN11482_c0_g1	TRINITY_DN11482_c0_g1_i5	FvH4_4g12580.1	100	0	875
TRINITY_DN11486_c0_g1	TRINITY_DN11486_c0_g1_i1	FvH4_7g30940.1	100	1e-69	228
TRINITY_DN11487_c0_g1	TRINITY_DN11487_c0_g1_i2	FvH4_6g12130.1	100	0	541
TRINITY_DN11493_c0_g2	TRINITY_DN11493_c0_g2_i3	FvH4_5g29520.1	100	2e-84	264
TRINITY_DN11499_c0_g1	TRINITY_DN11499_c0_g1_i1	FvH4_4g15270.1	100	0	524
TRINITY_DN115_c0_g1	TRINITY_DN115_c0_g1_i2	FvH4_6g05890.1	100	0	764
TRINITY_DN1150_c1_g1	TRINITY_DN1150_c1_g1_i3	FvH4_1g00560.1	100	5e-46	159
TRINITY_DN11504_c1_g2	TRINITY_DN11504_c1_g2_i2	FvH4_7g27000.1	100	3e-115	365
TRINITY_DN11506_c0_g1	TRINITY_DN11506_c0_g1_i1	FvH4_5g12520.1	100	0	904
TRINITY_DN1151_c1_g2	TRINITY_DN1151_c1_g2_i1	FvH4_2g04940.1	100	2e-26	104
TRINITY_DN115119_c0_g1	TRINITY_DN115119_c0_g1_i1	FvH4_6g28140.1	100	4e-78	242
TRINITY_DN11512_c0_g2	TRINITY_DN11512_c0_g2_i2	FvH4_3g00130.1	100	0	1363
TRINITY_DN11523_c0_g1	TRINITY_DN11523_c0_g1_i2	FvH4_5g27870.1	100	0	579
TRINITY_DN11529_c1_g1	TRINITY_DN11529_c1_g1_i2	FvH4_1g27370.1	100	1e-56	196
TRINITY_DN11537_c0_g1	TRINITY_DN11537_c0_g1_i4	FvH4_1g04310.1	100	0	854
TRINITY_DN1155_c0_g2	TRINITY_DN1155_c0_g2_i2	FvH4_3g28720.1	100	0	1384
TRINITY_DN11550_c0_g1	TRINITY_DN11550_c0_g1_i2	FvH4_4g12380.1	100	0	2085
TRINITY_DN11553_c0_g2	TRINITY_DN11553_c0_g2_i1	FvH4_4g07900.1	100	8e-59	193
TRINITY_DN11562_c0_g1	TRINITY_DN11562_c0_g1_i3	FvH4_2g12380.1	100	0	1011
TRINITY_DN11562_c2_g2	TRINITY_DN11562_c2_g2_i1	FvH4_3g12270.1	100	0	1507
TRINITY_DN11566_c0_g1	TRINITY_DN11566_c0_g1_i1	FvH4_6g09780.1	100	4e-162	457
TRINITY_DN11567_c0_g1	TRINITY_DN11567_c0_g1_i1	FvH4_2g02880.1	100	9e-124	362
TRINITY_DN11573_c0_g1	TRINITY_DN11573_c0_g1_i1	FvH4_5g03750.1	100	8e-77	238
TRINITY_DN11582_c0_g1	TRINITY_DN11582_c0_g1_i1	FvH4_2g20150.1	100	0	823
TRINITY_DN11591_c0_g1	TRINITY_DN11591_c0_g1_i4	FvH4_5g20450.1	100	2e-162	498
TRINITY_DN11592_c0_g1	TRINITY_DN11592_c0_g1_i2	FvH4_6g17590.1	100	0	1097
TRINITY_DN11596_c0_g1	TRINITY_DN11596_c0_g1_i1	FvH4_5g01820.1	100	2e-167	474
TRINITY_DN116028_c0_g1	TRINITY_DN116028_c0_g1_i1	FvH4_2g07550.1	100	3e-125	359
TRINITY_DN11607_c0_g2	TRINITY_DN11607_c0_g2_i1	FvH4_3g24280.1	100	0	1256
TRINITY_DN11609_c0_g1	TRINITY_DN11609_c0_g1_i1	FvH4_1g26260.1	100	4e-137	404
TRINITY_DN1161_c0_g18	TRINITY_DN1161_c0_g1_i18	FvH4_2g36260.1	100	0	1493
TRINITY_DN11614_c0_g1	TRINITY_DN11614_c0_g1_i1	FvH4_3g11400.1	100	2e-170	492
TRINITY_DN11620_c0_g1	TRINITY_DN11620_c0_g1_i4	FvH4_2g24070.1	100	0	886
TRINITY_DN11623_c0_g1	TRINITY_DN11623_c0_g1_i5	FvH4_3g40230.1	100	0	741
TRINITY_DN11630_c0_g1	TRINITY_DN11630_c0_g1_i1	FvH4_2g03310.1	100	0	820
TRINITY_DN11631_c0_g1	TRINITY_DN11631_c0_g1_i2	FvH4_5g36400.1	100	5e-35	130
TRINITY_DN11634_c0_g1	TRINITY_DN11634_c0_g1_i6	FvH4_1g03280.1	100	0	576
TRINITY_DN11635_c0_g1	TRINITY_DN11635_c0_g1_i1	FvH4_3g26290.1	100	0	633
TRINITY_DN11637_c0_g1	TRINITY_DN11637_c0_g1_i4	FvH4_6g52040.1	100	0	830
TRINITY_DN11638_c0_g1	TRINITY_DN11638_c0_g1_i1	FvH4_7g02970.1	100	3e-48	149
TRINITY_DN11653_c0_g1	TRINITY_DN11653_c0_g1_i1	FvH4_3g11220.1	100	0	770
TRINITY_DN11656_c0_g1	TRINITY_DN11656_c0_g1_i1	FvH4_2g01440.1	100	0	674
TRINITY_DN11659_c1_g2	TRINITY_DN11659_c1_g2_i1	FvH4_3g25370.1	100	8e-118	343
TRINITY_DN1166_c1_g4	TRINITY_DN1166_c1_g4_i2	FvH4_4g11280.1	100	0	748
TRINITY_DN11660_c0_g1	TRINITY_DN11660_c0_g1_i2	FvH4_3g35690.1	100	0	523
TRINITY_DN11661_c0_g1	TRINITY_DN11661_c0_g1_i1	FvH4_1g18940.1	100	0	1239
TRINITY_DN11662_c0_g2	TRINITY_DN11662_c0_g2_i1	FvH4_3g18210.1	100	0	1142
TRINITY_DN11667_c0_g1	TRINITY_DN11667_c0_g1_i5	FvH4_5g30530.1	100	0	1004
TRINITY_DN1167_c1_g1	TRINITY_DN1167_c1_g1_i3	FvH4_5g27610.1	100	0	1021
TRINITY_DN11673_c0_g1	TRINITY_DN11673_c0_g1_i1	FvH4_6g14280.1	100	2e-15	69.3
TRINITY_DN11677_c0_g1	TRINITY_DN11677_c0_g1_i3	FvH4_5g21130.1	100	0	1545
TRINITY_DN116814_c0_g1	TRINITY_DN116814_c0_g1_i1	FvH4_7g12670.1	100	6e-98	287
TRINITY_DN11687_c0_g1	TRINITY_DN11687_c0_g1_i1	FvH4_2g12890.1	100	3e-89	275
TRINITY_DN116882_c0_g1	TRINITY_DN116882_c0_g1_i1	FvH4_5g01440.1	100	4e-70	216
TRINITY_DN116885_c0_g1	TRINITY_DN116885_c0_g1_i1	FvH4_7g16550.1	100	9e-115	328
TRINITY_DN1169_c0_g3	TRINITY_DN1169_c0_g3_i1	FvH4_3g07390.1	100	6e-90	270
TRINITY_DN1169_c1_g2	TRINITY_DN1169_c1_g2_i3	FvH4_2g39280.1	100	0	667
TRINITY_DN1169_c1_g3	TRINITY_DN1169_c1_g3_i2	FvH4_2g15490.1	100	0	1665
TRINITY_DN11693_c0_g2	TRINITY_DN11693_c0_g2_i1	FvH4_1g30350.1	100	8e-168	513
TRINITY_DN11696_c0_g1	TRINITY_DN11696_c0_g1_i1	FvH4_5g23350.1	100	1e-133	406
TRINITY_DN11698_c0_g1	TRINITY_DN11698_c0_g1_i1	FvH4_4g33500.1	100	0	1248
TRINITY_DN11699_c0_g1	TRINITY_DN11699_c0_g1_i1	FvH4_6g07420.1	100	0	2011
TRINITY_DN117_c0_g1	TRINITY_DN117_c0_g1_i1	FvH4_4g26620.1	100	7e-63	197
TRINITY_DN1171_c0_g1	TRINITY_DN1171_c0_g1_i1	FvH4_7g23560.1	100	4e-81	268
TRINITY_DN11711_c0_g1	TRINITY_DN11711_c0_g1_i1	FvH4_6g10140.1	100	0	620
TRINITY_DN11713_c0_g1	TRINITY_DN11713_c0_g1_i1	FvH4_5g09140.1	100	0	572
TRINITY_DN11719_c0_g1	TRINITY_DN11719_c0_g1_i3	FvH4_6g10520.1	100	8e-96	288
TRINITY_DN117199_c0_g1	TRINITY_DN117199_c0_g1_i2	FvH4_2g01990.1	100	2e-42	158
TRINITY_DN11720_c0_g1	TRINITY_DN11720_c0_g1_i1	FvH4_2g10130.1	100	0	929
TRINITY_DN117217_c0_g1	TRINITY_DN117217_c0_g1_i2	FvH4_3g36870.1	100	0	1462
TRINITY_DN11732_c0_g1	TRINITY_DN11732_c0_g1_i1	FvH4_2g06970.1	100	1e-162	473
TRINITY_DN11732_c0_g3	TRINITY_DN11732_c0_g3_i6	FvH4_4g35310.1	100	0	763
TRINITY_DN11743_c0_g1	TRINITY_DN11743_c0_g1_i2	FvH4_6g28890.1	100	0	1873
TRINITY_DN11744_c0_g1	TRINITY_DN11744_c0_g1_i1	FvH4_5g01500.1	100	0	614
TRINITY_DN11748_c0_g1	TRINITY_DN11748_c0_g1_i3	FvH4_6g48010.1	100	0	551
TRINITY_DN117539_c0_g1	TRINITY_DN117539_c0_g1_i1	FvH4_1g20560.1	100	1e-84	256
TRINITY_DN11756_c0_g1	TRINITY_DN11756_c0_g1_i6	FvH4_7g32250.1	100	0	1947
TRINITY_DN11756_c1_g1	TRINITY_DN11756_c1_g1_i1	FvH4_5g08480.1	100	0	717
TRINITY_DN117590_c0_g1	TRINITY_DN117590_c0_g1_i2	FvH4_6g10060.1	100	0	929
TRINITY_DN11761_c0_g1	TRINITY_DN11761_c0_g1_i4	FvH4_3g38900.1	100	6e-92	278
TRINITY_DN11762_c0_g1	TRINITY_DN11762_c0_g1_i1	FvH4_6g25410.1	100	2e-73	228
TRINITY_DN117663_c0_g1	TRINITY_DN117663_c0_g1_i1	FvH4_4g27740.1	100	8e-79	236
TRINITY_DN1177_c0_g1	TRINITY_DN1177_c0_g1_i7	FvH4_3g36080.1	100	1e-17	82.4
TRINITY_DN11774_c0_g1	TRINITY_DN11774_c0_g1_i6	FvH4_3g24070.1	100	0	908
TRINITY_DN11776_c0_g2	TRINITY_DN11776_c0_g2_i2	FvH4_6g11840.1	100	0	818
TRINITY_DN1178_c0_g1	TRINITY_DN1178_c0_g1_i3	FvH4_3g14550.1	100	0	816
TRINITY_DN11780_c0_g1	TRINITY_DN11780_c0_g1_i1	FvH4_2g16540.1	100	3e-167	471
TRINITY_DN117856_c0_g2	TRINITY_DN117856_c0_g2_i1	FvH4_6g15380.1	100	9e-25	90.9
TRINITY_DN11788_c0_g3	TRINITY_DN11788_c0_g3_i1	FvH4_2g34350.1	100	0	1784
TRINITY_DN117976_c0_g1	TRINITY_DN117976_c0_g1_i1	FvH4_7g27060.1	100	2e-69	211
TRINITY_DN11799_c1_g1	TRINITY_DN11799_c1_g1_i1	FvH4_6g32820.1	100	0	715
TRINITY_DN118_c2_g1	TRINITY_DN118_c2_g1_i2	FvH4_1g18670.1	100	0	1682
TRINITY_DN1180_c0_g1	TRINITY_DN1180_c0_g1_i4	FvH4_1g19860.1	100	0	1030
TRINITY_DN11804_c0_g1	TRINITY_DN11804_c0_g1_i1	FvH4_4g12260.1	100	0	747
TRINITY_DN11807_c0_g1	TRINITY_DN11807_c0_g1_i1	FvH4_3g37180.1	100	2e-173	495
TRINITY_DN1182_c1_g1	TRINITY_DN1182_c1_g1_i1	FvH4_6g01930.1	100	0	1100
TRINITY_DN1182_c2_g1	TRINITY_DN1182_c2_g1_i1	FvH4_3g07530.1	100	0	1036
TRINITY_DN11822_c0_g1	TRINITY_DN11822_c0_g1_i1	FvH4_2g36430.1	100	1e-100	319
TRINITY_DN11824_c0_g1	TRINITY_DN11824_c0_g1_i1	FvH4_6g36460.1	100	0	573
TRINITY_DN11824_c1_g1	TRINITY_DN11824_c1_g1_i2	FvH4_5g08280.1	100	0	1995
TRINITY_DN11826_c0_g1	TRINITY_DN11826_c0_g1_i1	FvH4_3g31890.1	100	0	1914
TRINITY_DN11833_c0_g1	TRINITY_DN11833_c0_g1_i1	FvH4_3g08320.1	100	4e-156	446
TRINITY_DN11835_c0_g1	TRINITY_DN11835_c0_g1_i2	FvH4_5g32260.1	100	0	969
TRINITY_DN11854_c0_g1	TRINITY_DN11854_c0_g1_i7	FvH4_2g35840.1	100	0	778
TRINITY_DN11859_c0_g1	TRINITY_DN11859_c0_g1_i2	FvH4_6g16460.1	100	0	989
TRINITY_DN11861_c0_g2	TRINITY_DN11861_c0_g2_i1	FvH4_4g19170.1	100	1e-93	274
TRINITY_DN1187_c0_g2	TRINITY_DN1187_c0_g2_i2	FvH4_2g12910.1	100	0	1045
TRINITY_DN118700_c0_g1	TRINITY_DN118700_c0_g1_i1	FvH4_7g07090.1	100	7e-28	99.4
TRINITY_DN11871_c0_g1	TRINITY_DN11871_c0_g1_i1	FvH4_3g35670.1	100	2e-163	471
TRINITY_DN11889_c0_g3	TRINITY_DN11889_c0_g3_i1	FvH4_4g01980.1	100	0	1080
TRINITY_DN11891_c0_g2	TRINITY_DN11891_c0_g2_i2	FvH4_6g31920.1	100	3e-151	455
TRINITY_DN11895_c0_g1	TRINITY_DN11895_c0_g1_i1	FvH4_4g36690.1	100	0	800
TRINITY_DN11898_c0_g1	TRINITY_DN11898_c0_g1_i2	FvH4_1g03790.1	100	3e-47	133
TRINITY_DN11901_c0_g1	TRINITY_DN11901_c0_g1_i1	FvH4_2g23360.1	100	0	1018
TRINITY_DN11904_c0_g1	TRINITY_DN11904_c0_g1_i1	FvH4_4g21990.1	100	0	687
TRINITY_DN11905_c0_g1	TRINITY_DN11905_c0_g1_i3	FvH4_7g05720.1	100	3e-129	372
TRINITY_DN119077_c0_g1	TRINITY_DN119077_c0_g1_i1	FvH4_3g19220.1	100	0	879
TRINITY_DN1191_c0_g11	TRINITY_DN1191_c0_g1_i11	FvH4_5g16670.1	100	1e-147	446
TRINITY_DN11910_c0_g1	TRINITY_DN11910_c0_g1_i1	FvH4_1g28570.1	100	1e-61	209
TRINITY_DN11922_c0_g1	TRINITY_DN11922_c0_g1_i1	FvH4_2g32520.1	100	0	551
TRINITY_DN11935_c0_g1	TRINITY_DN11935_c0_g1_i1	FvH4_6g51160.1	100	0	857
TRINITY_DN11947_c0_g1	TRINITY_DN11947_c0_g1_i1	FvH4_3g32680.1	100	4e-98	298
TRINITY_DN1195_c0_g1	TRINITY_DN1195_c0_g1_i1	FvH4_6g10770.1	100	2e-135	391
TRINITY_DN11955_c0_g1	TRINITY_DN11955_c0_g1_i3	FvH4_5g24410.1	100	0	944
TRINITY_DN11964_c1_g2	TRINITY_DN11964_c1_g2_i6	FvH4_2g12660.1	100	0	868
TRINITY_DN11964_c2_g1	TRINITY_DN11964_c2_g1_i1	FvH4_6g18490.1	100	0	722
TRINITY_DN11968_c0_g2	TRINITY_DN11968_c0_g2_i1	FvH4_4g03820.1	100	0	1361
TRINITY_DN11974_c0_g1	TRINITY_DN11974_c0_g1_i5	FvH4_3g36230.1	100	2e-57	186
TRINITY_DN11978_c0_g1	TRINITY_DN11978_c0_g1_i3	FvH4_7g15330.1	100	0	1656
TRINITY_DN11980_c0_g1	TRINITY_DN11980_c0_g1_i1	FvH4_1g12210.1	100	0	971
TRINITY_DN11981_c0_g1	TRINITY_DN11981_c0_g1_i1	FvH4_6g46930.1	100	0	1849
TRINITY_DN1199_c2_g1	TRINITY_DN1199_c2_g1_i1	FvH4_6g23170.1	100	3e-95	309
TRINITY_DN11991_c0_g1	TRINITY_DN11991_c0_g1_i7	FvH4_5g10610.1	100	0	1934
TRINITY_DN11991_c0_g3	TRINITY_DN11991_c0_g3_i1	FvH4_3g13860.1	100	4e-68	219
TRINITY_DN119937_c0_g2	TRINITY_DN119937_c0_g2_i1	FvH4_3g38270.1	100	0	1048
TRINITY_DN11995_c0_g10	TRINITY_DN11995_c0_g1_i10	FvH4_6g10690.1	100	0	1169
TRINITY_DN12_c0_g1	TRINITY_DN12_c0_g1_i1	FvH4_5g02400.1	100	0	1429
TRINITY_DN12_c0_g2	TRINITY_DN12_c0_g2_i1	FvH4_4g04490.1	100	0	1241
TRINITY_DN12_c2_g1	TRINITY_DN12_c2_g1_i2	FvH4_5g37140.1	100	2e-158	491
TRINITY_DN1200_c1_g3	TRINITY_DN1200_c1_g3_i6	FvH4_3g18640.1	100	0	1623
TRINITY_DN120051_c0_g1	TRINITY_DN120051_c0_g1_i1	FvH4_3g20820.1	100	2e-108	313
TRINITY_DN12006_c0_g1	TRINITY_DN12006_c0_g1_i2	FvH4_2g27090.1	100	4e-111	348
TRINITY_DN12008_c0_g1	TRINITY_DN12008_c0_g1_i1	FvH4_6g45210.1	100	3e-97	287
TRINITY_DN120090_c0_g1	TRINITY_DN120090_c0_g1_i1	FvH4_3g03950.1	100	9e-35	119
TRINITY_DN12019_c0_g1	TRINITY_DN12019_c0_g1_i1	FvH4_5g05560.1	100	2e-82	257
TRINITY_DN1202_c0_g1	TRINITY_DN1202_c0_g1_i2	FvH4_3g46070.1	100	1e-46	164
TRINITY_DN12020_c0_g2	TRINITY_DN12020_c0_g2_i2	FvH4_2g08290.1	100	0	806
TRINITY_DN12023_c0_g1	TRINITY_DN12023_c0_g1_i2	FvH4_5g18680.1	100	2e-89	274
TRINITY_DN120315_c0_g1	TRINITY_DN120315_c0_g1_i1	FvH4_4g05670.1	100	1e-106	313
TRINITY_DN12032_c0_g1	TRINITY_DN12032_c0_g1_i1	FvH4_6g32560.1	100	0	572
TRINITY_DN12032_c0_g2	TRINITY_DN12032_c0_g2_i1	FvH4_6g32570.1	100	0	547
TRINITY_DN12032_c1_g1	TRINITY_DN12032_c1_g1_i1	FvH4_2g25180.1	100	3e-116	319
TRINITY_DN12036_c0_g1	TRINITY_DN12036_c0_g1_i2	FvH4_2g04460.1	100	0	539
TRINITY_DN1204_c0_g1	TRINITY_DN1204_c0_g1_i1	FvH4_3g36860.1	100	0	605
TRINITY_DN12047_c0_g1	TRINITY_DN12047_c0_g1_i1	FvH4_2g28800.1	100	0	665
TRINITY_DN1205_c0_g1	TRINITY_DN1205_c0_g1_i1	FvH4_5g21090.1	100	0	906
TRINITY_DN1205_c0_g2	TRINITY_DN1205_c0_g2_i9	FvH4_3g04940.1	100	2e-133	397
TRINITY_DN12056_c0_g2	TRINITY_DN12056_c0_g2_i3	FvH4_1g24050.1	100	0	1279
TRINITY_DN12059_c0_g1	TRINITY_DN12059_c0_g1_i2	FvH4_6g51930.1	100	3e-118	362
TRINITY_DN1206_c0_g2	TRINITY_DN1206_c0_g2_i1	FvH4_4g09340.1	100	0	992
TRINITY_DN1206_c0_g3	TRINITY_DN1206_c0_g3_i1	FvH4_6g27940.1	100	0	1033
TRINITY_DN1206_c1_g2	TRINITY_DN1206_c1_g2_i5	FvH4_7g05310.1	100	0	815
TRINITY_DN12067_c0_g2	TRINITY_DN12067_c0_g2_i1	FvH4_4g17930.1	100	2e-27	107
TRINITY_DN12070_c0_g1	TRINITY_DN12070_c0_g1_i4	FvH4_3g00090.1	100	0	988
TRINITY_DN12072_c0_g1	TRINITY_DN12072_c0_g1_i3	FvH4_2g16500.1	100	0	604
TRINITY_DN1209_c0_g1	TRINITY_DN1209_c0_g1_i4	FvH4_3g19620.1	100	1e-153	464
TRINITY_DN12092_c0_g1	TRINITY_DN12092_c0_g1_i3	FvH4_1g14620.1	100	0	743
TRINITY_DN12092_c0_g3	TRINITY_DN12092_c0_g3_i4	FvH4_1g12790.1	100	0	561
TRINITY_DN12096_c0_g1	TRINITY_DN12096_c0_g1_i6	FvH4_2g16610.1	100	0	858
TRINITY_DN121_c1_g2	TRINITY_DN121_c1_g2_i4	FvH4_2g25990.1	100	0	808
TRINITY_DN12109_c0_g1	TRINITY_DN12109_c0_g1_i2	FvH4_5g16760.1	100	2e-22	89.7
TRINITY_DN12112_c0_g2	TRINITY_DN12112_c0_g2_i1	FvH4_2g04170.1	100	0	686
TRINITY_DN12114_c0_g1	TRINITY_DN12114_c0_g1_i3	FvH4_1g23360.1	100	1e-47	167
TRINITY_DN1212_c0_g2	TRINITY_DN1212_c0_g2_i1	FvH4_3g39980.1	100	0	750
TRINITY_DN1212_c0_g3	TRINITY_DN1212_c0_g3_i2	FvH4_3g39990.1	100	0	699
TRINITY_DN12127_c0_g1	TRINITY_DN12127_c0_g1_i1	FvH4_3g42100.1	100	5e-47	151
TRINITY_DN121278_c0_g1	TRINITY_DN121278_c0_g1_i1	FvH4_3g30190.1	100	2e-27	100
TRINITY_DN12130_c0_g1	TRINITY_DN12130_c0_g1_i1	FvH4_7g13340.1	100	0	1216
TRINITY_DN1214_c0_g1	TRINITY_DN1214_c0_g1_i5	FvH4_5g10190.1	100	0	782
TRINITY_DN12145_c0_g1	TRINITY_DN12145_c0_g1_i2	FvH4_7g07740.1	100	0	3542
TRINITY_DN12145_c0_g2	TRINITY_DN12145_c0_g2_i2	FvH4_6g08760.1	100	0	2222
TRINITY_DN12148_c0_g1	TRINITY_DN12148_c0_g1_i1	FvH4_3g12620.1	100	8e-66	205
TRINITY_DN1215_c0_g1	TRINITY_DN1215_c0_g1_i1	FvH4_1g29580.1	100	0	1447
TRINITY_DN12150_c0_g1	TRINITY_DN12150_c0_g1_i1	FvH4_1g05750.1	100	0	660
TRINITY_DN12164_c0_g1	TRINITY_DN12164_c0_g1_i2	FvH4_7g30250.1	100	1e-176	507
TRINITY_DN1217_c0_g1	TRINITY_DN1217_c0_g1_i1	FvH4_7g26780.1	100	0	699
TRINITY_DN12178_c0_g1	TRINITY_DN12178_c0_g1_i2	FvH4_5g29290.1	100	0	1591
TRINITY_DN12181_c0_g2	TRINITY_DN12181_c0_g2_i1	FvH4_6g07010.1	100	2e-138	409
TRINITY_DN12182_c0_g1	TRINITY_DN12182_c0_g1_i1	FvH4_4g27030.1	100	0	1030
TRINITY_DN12184_c0_g1	TRINITY_DN12184_c0_g1_i1	FvH4_6g16830.1	100	1e-122	354
TRINITY_DN121846_c0_g1	TRINITY_DN121846_c0_g1_i1	FvH4_7g06260.1	100	4e-39	136
TRINITY_DN12185_c0_g1	TRINITY_DN12185_c0_g1_i1	FvH4_6g45500.1	100	1e-67	217
TRINITY_DN12187_c0_g1	TRINITY_DN12187_c0_g1_i2	FvH4_4g21780.1	100	1e-107	323
TRINITY_DN12190_c0_g1	TRINITY_DN12190_c0_g1_i1	FvH4_2g14130.1	100	0	426
TRINITY_DN122_c0_g2	TRINITY_DN122_c0_g2_i1	FvH4_2g32700.1	100	5e-58	181
TRINITY_DN1220_c0_g1	TRINITY_DN1220_c0_g1_i1	FvH4_6g11680.1	100	0	1290
TRINITY_DN1220_c0_g5	TRINITY_DN1220_c0_g5_i1	FvH4_7g11970.1	100	0	1204
TRINITY_DN122084_c0_g1	TRINITY_DN122084_c0_g1_i5	FvH4_5g26560.1	100	0	650
TRINITY_DN12216_c0_g1	TRINITY_DN12216_c0_g1_i1	FvH4_5g36230.1	100	0	742
TRINITY_DN12221_c0_g1	TRINITY_DN12221_c0_g1_i1	FvH4_3g28810.1	100	0	792
TRINITY_DN12222_c0_g1	TRINITY_DN12222_c0_g1_i1	FvH4_5g09730.1	100	3e-114	333
TRINITY_DN122354_c0_g2	TRINITY_DN122354_c0_g2_i1	FvH4_2g19240.1	100	7e-118	341
TRINITY_DN12236_c1_g1	TRINITY_DN12236_c1_g1_i4	FvH4_4g15300.1	100	0	961
TRINITY_DN12241_c0_g1	TRINITY_DN12241_c0_g1_i6	FvH4_6g06770.1	100	1e-72	177
TRINITY_DN1225_c0_g1	TRINITY_DN1225_c0_g1_i1	FvH4_2g03590.1	100	2e-102	307
TRINITY_DN12251_c0_g1	TRINITY_DN12251_c0_g1_i1	FvH4_7g15760.1	100	2e-50	170
TRINITY_DN122535_c1_g1	TRINITY_DN122535_c1_g1_i1	FvH4_2g23790.1	100	4e-73	226
TRINITY_DN12257_c0_g1	TRINITY_DN12257_c0_g1_i3	FvH4_7g06630.1	100	4e-70	233
TRINITY_DN12258_c0_g1	TRINITY_DN12258_c0_g1_i1	FvH4_5g04780.1	100	2e-53	184
TRINITY_DN122664_c0_g1	TRINITY_DN122664_c0_g1_i1	FvH4_4g35490.1	100	0	644
TRINITY_DN12274_c0_g2	TRINITY_DN12274_c0_g2_i2	FvH4_1g00510.1	100	0	560
TRINITY_DN12284_c0_g1	TRINITY_DN12284_c0_g1_i2	FvH4_2g14810.1	100	0	1229
TRINITY_DN12287_c0_g1	TRINITY_DN12287_c0_g1_i2	FvH4_3g20610.1	100	0	956
TRINITY_DN12293_c0_g1	TRINITY_DN12293_c0_g1_i1	FvH4_6g11040.1	100	0	925
TRINITY_DN12293_c0_g2	TRINITY_DN12293_c0_g2_i1	FvH4_1g25720.1	100	0	932
TRINITY_DN123_c0_g1	TRINITY_DN123_c0_g1_i5	FvH4_2g03130.1	100	2e-97	296
TRINITY_DN123065_c0_g1	TRINITY_DN123065_c0_g1_i1	FvH4_2g13510.1	100	1e-119	341
TRINITY_DN12312_c0_g1	TRINITY_DN12312_c0_g1_i1	FvH4_3g44500.1	100	4e-34	120
TRINITY_DN1232_c0_g1	TRINITY_DN1232_c0_g1_i3	FvH4_4g13730.1	100	2e-143	423
TRINITY_DN12330_c0_g1	TRINITY_DN12330_c0_g1_i2	FvH4_4g05910.1	100	3e-101	319
TRINITY_DN12334_c0_g1	TRINITY_DN12334_c0_g1_i1	FvH4_5g10840.1	100	0	956
TRINITY_DN123356_c0_g1	TRINITY_DN123356_c0_g1_i1	FvH4_7g28230.1	100	3e-98	285
TRINITY_DN12340_c0_g1	TRINITY_DN12340_c0_g1_i1	FvH4_4g17960.1	100	2e-179	530
TRINITY_DN12346_c0_g1	TRINITY_DN12346_c0_g1_i2	FvH4_7g00610.1	100	1e-128	396
TRINITY_DN12354_c0_g1	TRINITY_DN12354_c0_g1_i1	FvH4_3g30500.1	100	1e-39	134
TRINITY_DN12358_c0_g1	TRINITY_DN12358_c0_g1_i2	FvH4_6g04560.1	100	2e-67	206
TRINITY_DN123674_c0_g1	TRINITY_DN123674_c0_g1_i1	FvH4_7g29370.1	100	3e-167	471
TRINITY_DN12368_c0_g1	TRINITY_DN12368_c0_g1_i1	FvH4_3g07710.1	100	2e-120	360
TRINITY_DN1237_c0_g3	TRINITY_DN1237_c0_g3_i1	FvH4_5g06910.1	100	0	551
TRINITY_DN12374_c0_g3	TRINITY_DN12374_c0_g3_i2	FvH4_7g27160.1	100	2e-30	111
TRINITY_DN12383_c0_g1	TRINITY_DN12383_c0_g1_i2	FvH4_1g22920.1	100	0	528
TRINITY_DN12385_c0_g2	TRINITY_DN12385_c0_g2_i2	FvH4_7g06430.1	100	0	727
TRINITY_DN12386_c0_g1	TRINITY_DN12386_c0_g1_i1	FvH4_5g08670.1	100	1e-79	245
TRINITY_DN1239_c0_g1	TRINITY_DN1239_c0_g1_i4	FvH4_1g20700.1	100	0	574
TRINITY_DN12393_c0_g1	TRINITY_DN12393_c0_g1_i4	FvH4_1g06970.1	100	0	982
TRINITY_DN12402_c0_g14	TRINITY_DN12402_c0_g1_i14	FvH4_1g12620.1	100	4e-90	290
TRINITY_DN12402_c1_g1	TRINITY_DN12402_c1_g1_i2	FvH4_3g24770.1	100	1e-81	263
TRINITY_DN12407_c0_g1	TRINITY_DN12407_c0_g1_i2	FvH4_6g04840.1	100	0	1181
TRINITY_DN1241_c0_g2	TRINITY_DN1241_c0_g2_i2	FvH4_4g33760.1	100	2e-133	392
TRINITY_DN1241_c0_g3	TRINITY_DN1241_c0_g3_i1	FvH4_6g45220.1	100	0	1034
TRINITY_DN1241_c1_g1	TRINITY_DN1241_c1_g1_i6	FvH4_3g09270.1	100	0	2339
TRINITY_DN1241_c1_g6	TRINITY_DN1241_c1_g6_i1	FvH4_6g41720.1	100	5e-65	212
TRINITY_DN12418_c0_g1	TRINITY_DN12418_c0_g1_i4	FvH4_2g28030.1	100	0	1231
TRINITY_DN12423_c0_g1	TRINITY_DN12423_c0_g1_i8	FvH4_6g18620.1	100	0	1426
TRINITY_DN124230_c0_g1	TRINITY_DN124230_c0_g1_i1	FvH4_7g10490.1	100	1e-78	237
TRINITY_DN12426_c0_g2	TRINITY_DN12426_c0_g2_i1	FvH4_5g08800.1	100	7e-108	316
TRINITY_DN12428_c0_g1	TRINITY_DN12428_c0_g1_i1	FvH4_1g16440.1	100	0	576
TRINITY_DN12429_c0_g1	TRINITY_DN12429_c0_g1_i1	FvH4_1g15930.1	100	1e-111	331
TRINITY_DN1244_c0_g1	TRINITY_DN1244_c0_g1_i4	FvH4_5g19390.1	100	0	1089
TRINITY_DN1245_c0_g1	TRINITY_DN1245_c0_g1_i1	FvH4_6g33500.1	100	5e-73	234
TRINITY_DN12456_c0_g2	TRINITY_DN12456_c0_g2_i3	FvH4_7g16760.1	100	9e-136	267
TRINITY_DN12457_c0_g1	TRINITY_DN12457_c0_g1_i1	FvH4_4g25230.1	100	0	1461
TRINITY_DN12459_c0_g1	TRINITY_DN12459_c0_g1_i1	FvH4_4g00180.1	100	0	721
TRINITY_DN12460_c0_g1	TRINITY_DN12460_c0_g1_i2	FvH4_1g01070.1	100	0	783
TRINITY_DN12460_c1_g1	TRINITY_DN12460_c1_g1_i1	FvH4_6g10160.1	100	0	875
TRINITY_DN12461_c0_g2	TRINITY_DN12461_c0_g2_i2	FvH4_3g13180.1	100	2e-124	384
TRINITY_DN12467_c0_g1	TRINITY_DN12467_c0_g1_i1	FvH4_3g08440.1	100	2e-126	369
TRINITY_DN12470_c0_g1	TRINITY_DN12470_c0_g1_i1	FvH4_5g01840.1	100	6e-158	450
TRINITY_DN1248_c0_g1	TRINITY_DN1248_c0_g1_i1	FvH4_2g39300.1	100	0	951
TRINITY_DN12481_c0_g1	TRINITY_DN12481_c0_g1_i8	FvH4_2g13700.1	100	4e-65	160
TRINITY_DN12484_c0_g1	TRINITY_DN12484_c0_g1_i1	FvH4_1g02870.1	100	3e-85	256
TRINITY_DN12491_c0_g1	TRINITY_DN12491_c0_g1_i2	FvH4_6g44180.1	100	2e-74	224
TRINITY_DN12506_c0_g1	TRINITY_DN12506_c0_g1_i1	FvH4_2g34340.1	100	4e-82	261
TRINITY_DN12518_c0_g2	TRINITY_DN12518_c0_g2_i1	FvH4_5g36390.1	100	6e-177	507
TRINITY_DN12520_c0_g1	TRINITY_DN12520_c0_g1_i1	FvH4_6g44890.1	100	3e-146	412
TRINITY_DN12523_c0_g1	TRINITY_DN12523_c0_g1_i2	FvH4_3g18290.1	100	0	734
TRINITY_DN12535_c0_g2	TRINITY_DN12535_c0_g2_i1	FvH4_5g20070.1	100	2e-21	89.7
TRINITY_DN12538_c0_g1	TRINITY_DN12538_c0_g1_i1	FvH4_2g32360.1	100	0	552
TRINITY_DN12539_c0_g1	TRINITY_DN12539_c0_g1_i1	FvH4_6g27690.1	100	0	942
TRINITY_DN12546_c0_g2	TRINITY_DN12546_c0_g2_i1	FvH4_3g05510.1	100	2e-126	367
TRINITY_DN12548_c1_g1	TRINITY_DN12548_c1_g1_i1	FvH4_6g39330.1	100	0	980
TRINITY_DN12554_c0_g1	TRINITY_DN12554_c0_g1_i1	FvH4_6g13620.1	100	1e-110	320
TRINITY_DN12560_c0_g1	TRINITY_DN12560_c0_g1_i2	FvH4_4g17350.1	100	0	553
TRINITY_DN12572_c0_g1	TRINITY_DN12572_c0_g1_i3	FvH4_4g14070.1	100	0	550
TRINITY_DN12575_c0_g1	TRINITY_DN12575_c0_g1_i1	FvH4_3g20670.1	100	0	660
TRINITY_DN12580_c0_g1	TRINITY_DN12580_c0_g1_i3	FvH4_3g29070.1	100	0	1387
TRINITY_DN1259_c1_g1	TRINITY_DN1259_c1_g1_i2	FvH4_6g26160.1	100	0	1026
TRINITY_DN12591_c0_g1	TRINITY_DN12591_c0_g1_i4	FvH4_7g25810.1	100	1e-21	89
TRINITY_DN12595_c0_g2	TRINITY_DN12595_c0_g2_i1	FvH4_5g29490.1	100	0	951
TRINITY_DN12619_c0_g1	TRINITY_DN12619_c0_g1_i4	FvH4_1g29410.1	100	3e-28	115
TRINITY_DN126249_c0_g1	TRINITY_DN126249_c0_g1_i5	FvH4_4g02220.1	100	1e-52	186
TRINITY_DN12625_c0_g1	TRINITY_DN12625_c0_g1_i4	FvH4_6g30190.1	100	0	525
TRINITY_DN12627_c0_g1	TRINITY_DN12627_c0_g1_i3	FvH4_1g28700.1	100	1e-108	347
TRINITY_DN12628_c0_g1	TRINITY_DN12628_c0_g1_i1	FvH4_2g26340.1	100	0	740
TRINITY_DN12629_c0_g1	TRINITY_DN12629_c0_g1_i1	FvH4_4g07880.1	100	0	1768
TRINITY_DN1263_c0_g3	TRINITY_DN1263_c0_g3_i1	FvH4_2g13840.1	100	0	1006
TRINITY_DN1263_c1_g1	TRINITY_DN1263_c1_g1_i3	FvH4_3g16580.1	100	4e-160	479
TRINITY_DN12631_c0_g1	TRINITY_DN12631_c0_g1_i2	FvH4_7g27460.1	100	4e-97	305
TRINITY_DN12639_c0_g1	TRINITY_DN12639_c0_g1_i5	FvH4_1g30230.1	100	0	894
TRINITY_DN12666_c0_g1	TRINITY_DN12666_c0_g1_i1	FvH4_3g34090.1	100	0	754
TRINITY_DN12667_c0_g1	TRINITY_DN12667_c0_g1_i1	FvH4_1g18570.1	100	5e-53	177
TRINITY_DN12671_c0_g2	TRINITY_DN12671_c0_g2_i1	FvH4_3g29190.1	100	0	2011
TRINITY_DN12675_c1_g3	TRINITY_DN12675_c1_g3_i1	FvH4_2g13960.1	100	2e-130	384
TRINITY_DN12677_c0_g1	TRINITY_DN12677_c0_g1_i1	FvH4_5g12110.1	100	1e-16	72
TRINITY_DN1268_c0_g1	TRINITY_DN1268_c0_g1_i5	FvH4_4g16110.1	100	4e-92	293
TRINITY_DN12686_c0_g1	TRINITY_DN12686_c0_g1_i1	FvH4_2g26030.1	100	0	1253
TRINITY_DN12687_c0_g1	TRINITY_DN12687_c0_g1_i1	FvH4_6g28500.1	100	1e-42	142
TRINITY_DN12688_c0_g3	TRINITY_DN12688_c0_g3_i2	FvH4_3g24520.1	100	0	998
TRINITY_DN12693_c0_g1	TRINITY_DN12693_c0_g1_i1	FvH4_3g32560.1	100	2e-178	498
TRINITY_DN127_c0_g1	TRINITY_DN127_c0_g1_i1	FvH4_2g06560.1	100	0	592
TRINITY_DN1270_c0_g1	TRINITY_DN1270_c0_g1_i1	FvH4_4g06170.1	100	0	1962
TRINITY_DN12700_c0_g1	TRINITY_DN12700_c0_g1_i3	FvH4_6g19420.1	100	7e-102	323
TRINITY_DN12711_c0_g1	TRINITY_DN12711_c0_g1_i3	FvH4_3g26080.1	100	0	1118
TRINITY_DN12713_c0_g1	TRINITY_DN12713_c0_g1_i1	FvH4_3g41570.1	100	1e-99	295
TRINITY_DN127172_c0_g1	TRINITY_DN127172_c0_g1_i1	FvH4_5g35710.1	100	2e-41	142
TRINITY_DN12718_c0_g1	TRINITY_DN12718_c0_g1_i6	FvH4_4g03930.1	100	0	639
TRINITY_DN1272_c0_g3	TRINITY_DN1272_c0_g3_i2	FvH4_1g20840.1	100	0	730
TRINITY_DN12722_c0_g1	TRINITY_DN12722_c0_g1_i3	FvH4_2g10380.1	100	0	579
TRINITY_DN12729_c0_g1	TRINITY_DN12729_c0_g1_i2	FvH4_6g12390.1	100	8e-131	377
TRINITY_DN12731_c0_g1	TRINITY_DN12731_c0_g1_i2	FvH4_1g02850.1	100	0	848
TRINITY_DN12734_c0_g1	TRINITY_DN12734_c0_g1_i1	FvH4_2g41050.1	100	0	892
TRINITY_DN12740_c0_g1	TRINITY_DN12740_c0_g1_i1	FvH4_6g43160.1	100	0	788
TRINITY_DN12743_c0_g1	TRINITY_DN12743_c0_g1_i1	FvH4_1g03160.1	100	2e-35	130
TRINITY_DN1275_c0_g1	TRINITY_DN1275_c0_g1_i1	FvH4_2g36950.1	100	0	545
TRINITY_DN12754_c0_g1	TRINITY_DN12754_c0_g1_i1	FvH4_5g17240.1	100	1e-113	348
TRINITY_DN1276_c0_g2	TRINITY_DN1276_c0_g2_i3	FvH4_3g30900.1	100	0	736
TRINITY_DN12762_c0_g1	TRINITY_DN12762_c0_g1_i3	FvH4_2g13260.1	100	1e-144	429
TRINITY_DN127629_c0_g1	TRINITY_DN127629_c0_g1_i1	FvH4_3g15610.1	100	0	646
TRINITY_DN12767_c0_g1	TRINITY_DN12767_c0_g1_i3	FvH4_2g24150.1	100	3e-118	342
TRINITY_DN127676_c0_g1	TRINITY_DN127676_c0_g1_i2	FvH4_5g06750.1	100	3e-61	189
TRINITY_DN12774_c0_g1	TRINITY_DN12774_c0_g1_i1	FvH4_2g28610.1	100	0	684
TRINITY_DN12775_c0_g1	TRINITY_DN12775_c0_g1_i2	FvH4_4g22790.1	100	2e-79	243
TRINITY_DN12787_c0_g1	TRINITY_DN12787_c0_g1_i3	FvH4_1g28350.1	100	0	520
TRINITY_DN1279_c1_g1	TRINITY_DN1279_c1_g1_i7	FvH4_2g26170.1	100	1e-131	413
TRINITY_DN12793_c0_g1	TRINITY_DN12793_c0_g1_i1	FvH4_3g20720.1	100	0	747
TRINITY_DN12794_c0_g1	TRINITY_DN12794_c0_g1_i1	FvH4_4g21860.1	100	0	1350
TRINITY_DN12796_c0_g1	TRINITY_DN12796_c0_g1_i1	FvH4_4g36980.1	100	0	1164
TRINITY_DN1280_c0_g2	TRINITY_DN1280_c0_g2_i1	FvH4_2g10080.1	100	0	1966
TRINITY_DN12803_c0_g1	TRINITY_DN12803_c0_g1_i1	FvH4_2g17950.1	100	3e-62	199
TRINITY_DN12808_c0_g1	TRINITY_DN12808_c0_g1_i2	FvH4_1g18310.1	100	0	1494
TRINITY_DN1281_c0_g1	TRINITY_DN1281_c0_g1_i3	FvH4_1g11840.1	100	2e-113	350
TRINITY_DN12810_c0_g1	TRINITY_DN12810_c0_g1_i1	FvH4_3g31990.1	100	4e-36	130
TRINITY_DN12816_c0_g1	TRINITY_DN12816_c0_g1_i1	FvH4_6g16260.1	100	0	1454
TRINITY_DN12818_c0_g1	TRINITY_DN12818_c0_g1_i1	FvH4_4g19910.1	100	0	640
TRINITY_DN12823_c0_g1	TRINITY_DN12823_c0_g1_i5	FvH4_3g26200.1	100	0	689
TRINITY_DN12824_c0_g1	TRINITY_DN12824_c0_g1_i2	FvH4_6g21550.1	100	0	780
TRINITY_DN12826_c0_g1	TRINITY_DN12826_c0_g1_i1	FvH4_5g14500.1	100	0	620
TRINITY_DN12831_c0_g2	TRINITY_DN12831_c0_g2_i1	FvH4_6g29660.1	100	4e-154	459
TRINITY_DN12832_c0_g1	TRINITY_DN12832_c0_g1_i1	FvH4_6g49600.1	100	0	959
TRINITY_DN12838_c0_g2	TRINITY_DN12838_c0_g2_i4	FvH4_7g05550.1	100	6e-97	311
TRINITY_DN128396_c0_g1	TRINITY_DN128396_c0_g1_i1	FvH4_1g30520.1	100	7e-24	93.2
TRINITY_DN12841_c0_g1	TRINITY_DN12841_c0_g1_i3	FvH4_2g05610.1	100	0	824
TRINITY_DN12842_c0_g1	TRINITY_DN12842_c0_g1_i2	FvH4_2g16060.1	100	0	993
TRINITY_DN12847_c1_g1	TRINITY_DN12847_c1_g1_i1	FvH4_3g21360.1	100	2e-38	127
TRINITY_DN12863_c1_g2	TRINITY_DN12863_c1_g2_i3	FvH4_4g20800.1	100	2e-67	222
TRINITY_DN12865_c0_g1	TRINITY_DN12865_c0_g1_i6	FvH4_4g12880.1	100	3e-147	451
TRINITY_DN12887_c0_g1	TRINITY_DN12887_c0_g1_i1	FvH4_5g19860.1	100	2e-176	511
TRINITY_DN12892_c0_g1	TRINITY_DN12892_c0_g1_i2	FvH4_6g14500.1	100	0	753
TRINITY_DN12898_c0_g1	TRINITY_DN12898_c0_g1_i1	FvH4_4g18330.1	100	0	585
TRINITY_DN129_c0_g2	TRINITY_DN129_c0_g2_i1	FvH4_2g10730.1	100	6e-61	191
TRINITY_DN12905_c0_g1	TRINITY_DN12905_c0_g1_i2	FvH4_2g26400.1	100	0	551
TRINITY_DN1291_c0_g2	TRINITY_DN1291_c0_g2_i4	FvH4_5g27270.1	100	3e-128	392
TRINITY_DN12920_c0_g1	TRINITY_DN12920_c0_g1_i1	FvH4_2g32830.1	100	9e-99	296
TRINITY_DN12944_c0_g1	TRINITY_DN12944_c0_g1_i2	FvH4_5g18490.1	100	2e-144	430
TRINITY_DN12945_c0_g1	TRINITY_DN12945_c0_g1_i2	FvH4_6g18820.1	100	0	572
TRINITY_DN12951_c0_g1	TRINITY_DN12951_c0_g1_i1	FvH4_2g05120.1	100	0	933
TRINITY_DN12952_c0_g1	TRINITY_DN12952_c0_g1_i3	FvH4_1g05390.1	100	0	985
TRINITY_DN12956_c0_g1	TRINITY_DN12956_c0_g1_i8	FvH4_7g29020.1	100	3e-107	326
TRINITY_DN12957_c0_g1	TRINITY_DN12957_c0_g1_i2	FvH4_6g09310.1	100	0	560
TRINITY_DN12973_c0_g1	TRINITY_DN12973_c0_g1_i1	FvH4_6g22150.1	100	0	771
TRINITY_DN12975_c0_g1	TRINITY_DN12975_c0_g1_i5	FvH4_2g21190.1	100	1e-146	322
TRINITY_DN12979_c0_g1	TRINITY_DN12979_c0_g1_i1	FvH4_4g01000.1	100	0	712
TRINITY_DN1299_c0_g1	TRINITY_DN1299_c0_g1_i1	FvH4_2g26330.1	100	0	1669
TRINITY_DN12999_c0_g1	TRINITY_DN12999_c0_g1_i2	FvH4_5g05440.1	100	3e-133	397
TRINITY_DN13_c1_g1	TRINITY_DN13_c1_g1_i4	FvH4_6g07630.1	100	2e-101	303
TRINITY_DN13_c2_g1	TRINITY_DN13_c2_g1_i3	FvH4_5g39470.1	100	0	1158
TRINITY_DN13_c2_g4	TRINITY_DN13_c2_g4_i5	FvH4_4g23370.1	100	0	723
TRINITY_DN13_c7_g1	TRINITY_DN13_c7_g1_i1	FvH4_6g46250.1	100	6e-36	123
TRINITY_DN130_c0_g1	TRINITY_DN130_c0_g1_i2	FvH4_5g18350.1	100	0	587
TRINITY_DN130_c0_g3	TRINITY_DN130_c0_g3_i3	FvH4_6g08600.1	100	8e-28	107
TRINITY_DN13000_c0_g1	TRINITY_DN13000_c0_g1_i1	FvH4_3g17310.1	100	4e-45	155
TRINITY_DN130106_c0_g1	TRINITY_DN130106_c0_g1_i1	FvH4_4g05150.1	100	6e-17	71.2
TRINITY_DN13017_c0_g1	TRINITY_DN13017_c0_g1_i2	FvH4_5g14530.1	100	5e-63	207
TRINITY_DN1302_c0_g11	TRINITY_DN1302_c0_g1_i11	FvH4_1g09670.1	100	0	2729
TRINITY_DN13020_c0_g1	TRINITY_DN13020_c0_g1_i4	FvH4_5g26800.1	100	0	889
TRINITY_DN13020_c0_g2	TRINITY_DN13020_c0_g2_i1	FvH4_5g21010.1	100	3e-38	127
TRINITY_DN13023_c0_g1	TRINITY_DN13023_c0_g1_i1	FvH4_6g43870.1	100	2e-120	366
TRINITY_DN13024_c0_g1	TRINITY_DN13024_c0_g1_i1	FvH4_7g05010.1	100	1e-116	350
TRINITY_DN1303_c0_g1	TRINITY_DN1303_c0_g1_i1	FvH4_5g18090.1	100	0	1387
TRINITY_DN13033_c0_g1	TRINITY_DN13033_c0_g1_i3	FvH4_6g12760.1	100	1e-119	356
TRINITY_DN130331_c0_g1	TRINITY_DN130331_c0_g1_i1	FvH4_3g32770.1	100	2e-26	107
TRINITY_DN13035_c0_g1	TRINITY_DN13035_c0_g1_i1	FvH4_1g23990.1	100	3e-59	192
TRINITY_DN1305_c0_g1	TRINITY_DN1305_c0_g1_i1	FvH4_5g05670.1	100	0	1175
TRINITY_DN1305_c1_g4	TRINITY_DN1305_c1_g4_i1	FvH4_5g35080.1	100	0	693
TRINITY_DN13050_c0_g1	TRINITY_DN13050_c0_g1_i1	FvH4_2g02970.1	100	0	619
TRINITY_DN13058_c0_g1	TRINITY_DN13058_c0_g1_i1	FvH4_4g30410.1	100	5e-44	145
TRINITY_DN13067_c0_g1	TRINITY_DN13067_c0_g1_i3	FvH4_3g02020.1	100	0	739
TRINITY_DN130673_c1_g1	TRINITY_DN130673_c1_g1_i1	FvH4_2g13870.1	100	1e-15	72
TRINITY_DN13074_c0_g1	TRINITY_DN13074_c0_g1_i2	FvH4_1g10110.1	100	0	1383
TRINITY_DN1308_c0_g1	TRINITY_DN1308_c0_g1_i3	FvH4_6g19560.1	100	0	586
TRINITY_DN1308_c0_g2	TRINITY_DN1308_c0_g2_i1	FvH4_4g28030.1	100	0	697
TRINITY_DN1309_c0_g1	TRINITY_DN1309_c0_g1_i3	FvH4_2g00270.1	100	0	915
TRINITY_DN13093_c0_g1	TRINITY_DN13093_c0_g1_i1	FvH4_6g04380.1	100	0	1661
TRINITY_DN13101_c0_g1	TRINITY_DN13101_c0_g1_i1	FvH4_7g30650.1	100	5e-146	428
TRINITY_DN13133_c0_g1	TRINITY_DN13133_c0_g1_i2	FvH4_3g23340.1	100	9e-147	427
TRINITY_DN13134_c0_g1	TRINITY_DN13134_c0_g1_i1	FvH4_5g09740.1	100	0	620
TRINITY_DN13135_c0_g1	TRINITY_DN13135_c0_g1_i1	FvH4_4g17510.1	100	0	1357
TRINITY_DN1314_c0_g1	TRINITY_DN1314_c0_g1_i1	FvH4_6g11860.1	100	0	909
TRINITY_DN13140_c0_g1	TRINITY_DN13140_c0_g1_i1	FvH4_3g05440.1	100	0	1195
TRINITY_DN13147_c0_g1	TRINITY_DN13147_c0_g1_i3	FvH4_3g28740.1	100	0	1078
TRINITY_DN13148_c0_g1	TRINITY_DN13148_c0_g1_i2	FvH4_5g32720.1	100	0	813
TRINITY_DN13153_c0_g1	TRINITY_DN13153_c0_g1_i1	FvH4_1g06960.1	100	0	890
TRINITY_DN13155_c0_g1	TRINITY_DN13155_c0_g1_i1	FvH4_5g00730.1	100	3e-86	256
TRINITY_DN13156_c0_g1	TRINITY_DN13156_c0_g1_i2	FvH4_2g39450.1	100	0	729
TRINITY_DN13158_c0_g1	TRINITY_DN13158_c0_g1_i1	FvH4_7g29240.1	100	2e-146	412
TRINITY_DN13169_c0_g1	TRINITY_DN13169_c0_g1_i1	FvH4_2g39360.1	100	0	746
TRINITY_DN1317_c1_g2	TRINITY_DN1317_c1_g2_i2	FvH4_4g14430.1	100	0	821
TRINITY_DN1317_c1_g3	TRINITY_DN1317_c1_g3_i2	FvH4_4g11740.1	100	5e-57	193
TRINITY_DN13181_c0_g1	TRINITY_DN13181_c0_g1_i2	FvH4_2g08380.1	100	0	555
TRINITY_DN131826_c0_g1	TRINITY_DN131826_c0_g1_i1	FvH4_1g21550.1	100	1e-31	115
TRINITY_DN13186_c0_g2	TRINITY_DN13186_c0_g2_i1	FvH4_7g11060.1	100	3e-86	284
TRINITY_DN13191_c0_g1	TRINITY_DN13191_c0_g1_i2	FvH4_5g36930.1	100	0	607
TRINITY_DN13194_c0_g1	TRINITY_DN13194_c0_g1_i1	FvH4_7g21880.1	100	6e-102	298
TRINITY_DN13200_c0_g1	TRINITY_DN13200_c0_g1_i2	FvH4_5g09430.1	100	0	543
TRINITY_DN13209_c0_g1	TRINITY_DN13209_c0_g1_i1	FvH4_7g07680.1	100	0	763
TRINITY_DN13213_c0_g1	TRINITY_DN13213_c0_g1_i1	FvH4_6g34150.1	100	2e-82	264
TRINITY_DN13222_c0_g1	TRINITY_DN13222_c0_g1_i2	FvH4_6g02490.1	100	1e-140	417
TRINITY_DN1324_c0_g3	TRINITY_DN1324_c0_g3_i2	FvH4_2g31220.1	100	0	1370
TRINITY_DN13243_c0_g1	TRINITY_DN13243_c0_g1_i1	FvH4_3g04610.1	100	0	572
TRINITY_DN13245_c0_g1	TRINITY_DN13245_c0_g1_i1	FvH4_4g12350.1	100	0	1795
TRINITY_DN13246_c0_g1	TRINITY_DN13246_c0_g1_i1	FvH4_5g00180.1	100	2e-165	475
TRINITY_DN1326_c0_g2	TRINITY_DN1326_c0_g2_i1	FvH4_6g23060.1	100	2e-95	300
TRINITY_DN1326_c1_g1	TRINITY_DN1326_c1_g1_i1	FvH4_4g10190.1	100	0	1243
TRINITY_DN13268_c0_g3	TRINITY_DN13268_c0_g3_i2	FvH4_1g25140.1	100	0	1486
TRINITY_DN1327_c0_g4	TRINITY_DN1327_c0_g4_i1	FvH4_4g01960.1	100	0	900
TRINITY_DN13271_c0_g1	TRINITY_DN13271_c0_g1_i1	FvH4_7g27760.1	100	0	1019
TRINITY_DN13276_c0_g1	TRINITY_DN13276_c0_g1_i1	FvH4_7g27830.1	100	5e-106	311
TRINITY_DN13286_c0_g1	TRINITY_DN13286_c0_g1_i3	FvH4_6g30530.1	100	0	1296
TRINITY_DN13293_c0_g1	TRINITY_DN13293_c0_g1_i1	FvH4_4g27310.1	100	8e-113	335
TRINITY_DN13296_c0_g2	TRINITY_DN13296_c0_g2_i1	FvH4_3g28420.1	100	2e-58	190
TRINITY_DN13297_c0_g2	TRINITY_DN13297_c0_g2_i1	FvH4_3g24610.1	100	0	828
TRINITY_DN1330_c1_g1	TRINITY_DN1330_c1_g1_i6	FvH4_5g12340.1	100	0	2403
TRINITY_DN13303_c0_g1	TRINITY_DN13303_c0_g1_i1	FvH4_6g53400.1	100	3e-34	118
TRINITY_DN13303_c0_g2	TRINITY_DN13303_c0_g2_i2	FvH4_6g53350.1	100	0	657
TRINITY_DN13308_c0_g1	TRINITY_DN13308_c0_g1_i1	FvH4_6g00720.1	100	9e-128	366
TRINITY_DN13311_c0_g1	TRINITY_DN13311_c0_g1_i1	FvH4_2g01760.1	100	0	604
TRINITY_DN13315_c0_g2	TRINITY_DN13315_c0_g2_i2	FvH4_6g37960.1	100	3e-28	72
TRINITY_DN13322_c0_g1	TRINITY_DN13322_c0_g1_i1	FvH4_2g32810.1	100	0	832
TRINITY_DN13324_c0_g1	TRINITY_DN13324_c0_g1_i3	FvH4_6g14720.1	100	0	1764
TRINITY_DN13335_c0_g1	TRINITY_DN13335_c0_g1_i1	FvH4_4g16090.1	100	4e-74	233
TRINITY_DN13347_c0_g2	TRINITY_DN13347_c0_g2_i4	FvH4_6g40480.1	100	2e-78	254
TRINITY_DN13347_c3_g1	TRINITY_DN13347_c3_g1_i1	FvH4_7g03360.1	100	3e-176	514
TRINITY_DN13362_c1_g1	TRINITY_DN13362_c1_g1_i1	FvH4_6g45770.1	100	0	991
TRINITY_DN13366_c0_g1	TRINITY_DN13366_c0_g1_i4	FvH4_2g12500.1	100	0	1126
TRINITY_DN13369_c0_g1	TRINITY_DN13369_c0_g1_i2	FvH4_6g06870.1	100	0	1459
TRINITY_DN1337_c0_g1	TRINITY_DN1337_c0_g1_i2	FvH4_2g17820.1	100	3e-68	210
TRINITY_DN13374_c0_g2	TRINITY_DN13374_c0_g2_i1	FvH4_1g21820.1	100	4e-42	144
TRINITY_DN133813_c4_g1	TRINITY_DN133813_c4_g1_i1	FvH4_6g32890.1	100	9e-46	154
TRINITY_DN133882_c0_g1	TRINITY_DN133882_c0_g1_i1	FvH4_6g46440.1	100	1e-94	283
TRINITY_DN1339_c0_g1	TRINITY_DN1339_c0_g1_i1	FvH4_1g16370.1	100	2e-56	182
TRINITY_DN13393_c0_g2	TRINITY_DN13393_c0_g2_i6	FvH4_6g42640.1	100	0	766
TRINITY_DN13394_c0_g3	TRINITY_DN13394_c0_g3_i1	FvH4_6g17350.1	100	0	1163
TRINITY_DN1341_c0_g1	TRINITY_DN1341_c0_g1_i1	FvH4_7g12020.1	100	0	3556
TRINITY_DN13422_c0_g1	TRINITY_DN13422_c0_g1_i1	FvH4_2g38540.1	100	2e-106	326
TRINITY_DN13423_c0_g1	TRINITY_DN13423_c0_g1_i1	FvH4_2g38330.1	100	7e-180	524
TRINITY_DN13427_c0_g1	TRINITY_DN13427_c0_g1_i2	FvH4_3g20640.1	100	1e-33	120
TRINITY_DN1343_c0_g1	TRINITY_DN1343_c0_g1_i1	FvH4_6g43120.1	100	0	709
TRINITY_DN13430_c0_g1	TRINITY_DN13430_c0_g1_i1	FvH4_4g29630.1	100	4e-162	474
TRINITY_DN134330_c0_g1	TRINITY_DN134330_c0_g1_i1	FvH4_1g30390.1	100	0	875
TRINITY_DN13434_c0_g1	TRINITY_DN13434_c0_g1_i1	FvH4_2g17160.1	100	0	860
TRINITY_DN13436_c0_g1	TRINITY_DN13436_c0_g1_i2	FvH4_2g21280.1	100	0	543
TRINITY_DN13437_c0_g1	TRINITY_DN13437_c0_g1_i1	FvH4_4g22190.1	100	1e-127	376
TRINITY_DN1344_c0_g1	TRINITY_DN1344_c0_g1_i3	FvH4_5g37820.1	100	2e-147	449
TRINITY_DN1344_c0_g2	TRINITY_DN1344_c0_g2_i1	FvH4_4g13570.1	100	3e-78	249
TRINITY_DN1344_c0_g3	TRINITY_DN1344_c0_g3_i1	FvH4_4g13580.1	100	6e-44	151
TRINITY_DN1344_c1_g1	TRINITY_DN1344_c1_g1_i1	FvH4_6g01460.1	100	0	925
TRINITY_DN13448_c0_g1	TRINITY_DN13448_c0_g1_i4	FvH4_4g30090.1	100	0	874
TRINITY_DN1345_c0_g1	TRINITY_DN1345_c0_g1_i7	FvH4_7g01970.1	100	0	657
TRINITY_DN1345_c0_g2	TRINITY_DN1345_c0_g2_i1	FvH4_3g44710.1	100	0	903
TRINITY_DN1345_c2_g1	TRINITY_DN1345_c2_g1_i2	FvH4_3g22230.1	100	0	2162
TRINITY_DN13453_c0_g1	TRINITY_DN13453_c0_g1_i2	FvH4_3g00940.1	100	2e-152	373
TRINITY_DN1346_c0_g1	TRINITY_DN1346_c0_g1_i1	FvH4_7g07910.1	100	1e-49	162
TRINITY_DN1346_c1_g1	TRINITY_DN1346_c1_g1_i4	FvH4_4g04340.1	100	3e-44	158
TRINITY_DN1349_c0_g2	TRINITY_DN1349_c0_g2_i2	FvH4_2g22170.1	100	0	964
TRINITY_DN13492_c0_g1	TRINITY_DN13492_c0_g1_i1	FvH4_2g01180.1	100	0	833
TRINITY_DN13494_c0_g1	TRINITY_DN13494_c0_g1_i2	FvH4_6g26760.1	100	0	869
TRINITY_DN13501_c0_g3	TRINITY_DN13501_c0_g3_i1	FvH4_3g33250.1	100	0	694
TRINITY_DN1351_c0_g1	TRINITY_DN1351_c0_g1_i2	FvH4_4g16310.1	100	0	1011
TRINITY_DN13511_c0_g1	TRINITY_DN13511_c0_g1_i1	FvH4_3g28600.1	100	0	625
TRINITY_DN13513_c0_g1	TRINITY_DN13513_c0_g1_i1	FvH4_6g45240.1	100	0	700
TRINITY_DN13517_c0_g1	TRINITY_DN13517_c0_g1_i3	FvH4_2g10160.1	100	0	595
TRINITY_DN13517_c0_g2	TRINITY_DN13517_c0_g2_i2	FvH4_2g40320.1	100	2e-81	253
TRINITY_DN1352_c0_g1	TRINITY_DN1352_c0_g1_i2	FvH4_6g03310.1	100	0	673
TRINITY_DN1352_c0_g3	TRINITY_DN1352_c0_g3_i2	FvH4_6g17990.1	100	0	953
TRINITY_DN1352_c1_g1	TRINITY_DN1352_c1_g1_i2	FvH4_1g18490.1	100	0	897
TRINITY_DN13537_c0_g1	TRINITY_DN13537_c0_g1_i6	FvH4_4g29670.1	100	0	843
TRINITY_DN1355_c0_g1	TRINITY_DN1355_c0_g1_i5	FvH4_4g23520.1	100	0	564
TRINITY_DN13551_c0_g1	TRINITY_DN13551_c0_g1_i1	FvH4_6g07240.1	100	9e-74	233
TRINITY_DN13555_c1_g1	TRINITY_DN13555_c1_g1_i3	FvH4_3g27650.1	100	0	628
TRINITY_DN13559_c0_g1	TRINITY_DN13559_c0_g1_i1	FvH4_7g17010.1	100	1e-70	235
TRINITY_DN1357_c0_g1	TRINITY_DN1357_c0_g1_i5	FvH4_2g04800.1	100	3e-27	108
TRINITY_DN13574_c0_g1	TRINITY_DN13574_c0_g1_i1	FvH4_6g44790.1	100	8e-153	441
TRINITY_DN13577_c0_g1	TRINITY_DN13577_c0_g1_i2	FvH4_6g14810.1	100	2e-133	403
TRINITY_DN13578_c0_g1	TRINITY_DN13578_c0_g1_i1	FvH4_7g13650.1	100	0	696
TRINITY_DN13579_c0_g1	TRINITY_DN13579_c0_g1_i1	FvH4_1g00520.1	100	0	652
TRINITY_DN13584_c0_g1	TRINITY_DN13584_c0_g1_i3	FvH4_3g39550.1	100	2e-149	424
TRINITY_DN1359_c0_g2	TRINITY_DN1359_c0_g2_i5	FvH4_6g42670.1	100	0	1251
TRINITY_DN13597_c0_g1	TRINITY_DN13597_c0_g1_i1	FvH4_6g53320.1	100	0	1231
TRINITY_DN13600_c0_g1	TRINITY_DN13600_c0_g1_i2	FvH4_2g09670.1	100	0	693
TRINITY_DN13618_c0_g2	TRINITY_DN13618_c0_g2_i1	FvH4_2g38470.1	100	0	528
TRINITY_DN13623_c0_g1	TRINITY_DN13623_c0_g1_i1	FvH4_2g35980.1	100	0	818
TRINITY_DN13624_c0_g1	TRINITY_DN13624_c0_g1_i1	FvH4_6g08900.1	100	9e-56	177
TRINITY_DN13626_c0_g1	TRINITY_DN13626_c0_g1_i2	FvH4_1g03980.1	100	0	813
TRINITY_DN13627_c0_g1	TRINITY_DN13627_c0_g1_i1	FvH4_6g30930.1	100	0	719
TRINITY_DN1363_c1_g1	TRINITY_DN1363_c1_g1_i1	FvH4_2g07960.1	100	0	583
TRINITY_DN136349_c0_g1	TRINITY_DN136349_c0_g1_i2	FvH4_4g16970.1	100	0	655
TRINITY_DN1364_c0_g1	TRINITY_DN1364_c0_g1_i2	FvH4_3g45820.1	100	5e-147	437
TRINITY_DN13645_c0_g1	TRINITY_DN13645_c0_g1_i1	FvH4_2g32170.1	100	0	652
TRINITY_DN13646_c0_g1	TRINITY_DN13646_c0_g1_i1	FvH4_5g03030.1	100	2e-37	129
TRINITY_DN136487_c0_g1	TRINITY_DN136487_c0_g1_i1	FvH4_3g12600.1	100	0	1403
TRINITY_DN1365_c0_g2	TRINITY_DN1365_c0_g2_i2	FvH4_3g42590.1	100	5e-28	110
TRINITY_DN13653_c0_g1	TRINITY_DN13653_c0_g1_i2	FvH4_3g02520.1	100	0	1460
TRINITY_DN13670_c0_g2	TRINITY_DN13670_c0_g2_i3	FvH4_5g00640.1	100	0	721
TRINITY_DN13676_c0_g2	TRINITY_DN13676_c0_g2_i1	FvH4_3g30530.1	100	5e-34	117
TRINITY_DN1369_c1_g1	TRINITY_DN1369_c1_g1_i2	FvH4_3g21410.1	100	0	1174
TRINITY_DN13690_c0_g1	TRINITY_DN13690_c0_g1_i2	FvH4_7g25930.1	100	0	1340
TRINITY_DN13693_c0_g1	TRINITY_DN13693_c0_g1_i1	FvH4_3g09370.1	100	0	963
TRINITY_DN13698_c0_g1	TRINITY_DN13698_c0_g1_i2	FvH4_7g29950.1	100	0	1086
TRINITY_DN137_c1_g3	TRINITY_DN137_c1_g3_i1	FvH4_6g40230.1	100	3e-149	432
TRINITY_DN13710_c0_g1	TRINITY_DN13710_c0_g1_i1	FvH4_7g30540.1	100	0	868
TRINITY_DN1372_c0_g3	TRINITY_DN1372_c0_g3_i1	FvH4_3g29730.1	100	4e-39	139
TRINITY_DN13723_c0_g1	TRINITY_DN13723_c0_g1_i1	FvH4_2g07470.1	100	0	604
TRINITY_DN13725_c0_g1	TRINITY_DN13725_c0_g1_i2	FvH4_6g25110.1	100	0	1078
TRINITY_DN13726_c0_g1	TRINITY_DN13726_c0_g1_i1	FvH4_4g17910.1	100	6e-74	223
TRINITY_DN13734_c0_g1	TRINITY_DN13734_c0_g1_i1	FvH4_1g23460.1	100	0	805
TRINITY_DN13738_c0_g1	TRINITY_DN13738_c0_g1_i1	FvH4_6g26400.1	100	0	2471
TRINITY_DN13748_c0_g1	TRINITY_DN13748_c0_g1_i1	FvH4_2g37950.1	100	0	511
TRINITY_DN1375_c2_g1	TRINITY_DN1375_c2_g1_i2	FvH4_2g12700.1	100	4e-176	508
TRINITY_DN13756_c0_g1	TRINITY_DN13756_c0_g1_i1	FvH4_2g31870.1	100	5e-34	86.7
TRINITY_DN1376_c0_g2	TRINITY_DN1376_c0_g2_i2	FvH4_6g16480.1	100	9e-123	375
TRINITY_DN1376_c0_g3	TRINITY_DN1376_c0_g3_i1	FvH4_1g18500.1	100	0	727
TRINITY_DN1376_c1_g1	TRINITY_DN1376_c1_g1_i1	FvH4_2g00080.1	100	0	631
TRINITY_DN13760_c0_g1	TRINITY_DN13760_c0_g1_i1	FvH4_4g30280.1	100	0	1171
TRINITY_DN1377_c0_g16	TRINITY_DN1377_c0_g1_i16	FvH4_1g17400.1	100	6e-176	539
TRINITY_DN13782_c0_g1	TRINITY_DN13782_c0_g1_i1	FvH4_1g00220.1	100	0	1134
TRINITY_DN13787_c0_g1	TRINITY_DN13787_c0_g1_i2	FvH4_7g13720.1	100	4e-33	120
TRINITY_DN13788_c0_g1	TRINITY_DN13788_c0_g1_i1	FvH4_5g16990.1	100	0	704
TRINITY_DN1379_c1_g1	TRINITY_DN1379_c1_g1_i2	FvH4_5g13550.1	100	0	906
TRINITY_DN1380_c0_g1	TRINITY_DN1380_c0_g1_i2	FvH4_3g28410.1	100	0	724
TRINITY_DN1382_c0_g1	TRINITY_DN1382_c0_g1_i2	FvH4_4g33120.1	100	1e-165	500
TRINITY_DN13820_c0_g1	TRINITY_DN13820_c0_g1_i2	FvH4_6g05440.1	100	2e-93	295
TRINITY_DN13820_c0_g2	TRINITY_DN13820_c0_g2_i2	FvH4_1g20160.1	100	0	619
TRINITY_DN13821_c0_g1	TRINITY_DN13821_c0_g1_i2	FvH4_6g29910.1	100	9e-69	212
TRINITY_DN13824_c0_g2	TRINITY_DN13824_c0_g2_i1	FvH4_2g14710.1	100	2e-54	169
TRINITY_DN1383_c0_g1	TRINITY_DN1383_c0_g1_i2	FvH4_3g16240.1	100	7e-154	448
TRINITY_DN1383_c0_g3	TRINITY_DN1383_c0_g3_i1	FvH4_3g16380.1	100	1e-148	422
TRINITY_DN13832_c0_g1	TRINITY_DN13832_c0_g1_i2	FvH4_5g23090.1	100	0	1098
TRINITY_DN13833_c0_g1	TRINITY_DN13833_c0_g1_i3	FvH4_2g05860.1	100	3e-69	224
TRINITY_DN13835_c0_g1	TRINITY_DN13835_c0_g1_i1	FvH4_6g39240.1	100	0	685
TRINITY_DN13836_c0_g1	TRINITY_DN13836_c0_g1_i1	FvH4_6g26970.1	100	0	586
TRINITY_DN13838_c0_g1	TRINITY_DN13838_c0_g1_i4	FvH4_3g03790.1	100	0	488
TRINITY_DN13841_c0_g1	TRINITY_DN13841_c0_g1_i1	FvH4_4g14500.1	100	2e-114	342
TRINITY_DN13843_c0_g1	TRINITY_DN13843_c0_g1_i2	FvH4_5g28110.1	100	0	517
TRINITY_DN13846_c0_g1	TRINITY_DN13846_c0_g1_i2	FvH4_1g19610.1	100	0	1118
TRINITY_DN13847_c0_g1	TRINITY_DN13847_c0_g1_i1	FvH4_5g38750.1	100	7e-25	101
TRINITY_DN1385_c0_g1	TRINITY_DN1385_c0_g1_i5	FvH4_6g11540.1	100	0	540
TRINITY_DN13857_c0_g1	TRINITY_DN13857_c0_g1_i1	FvH4_6g08630.1	100	0	831
TRINITY_DN13865_c0_g1	TRINITY_DN13865_c0_g1_i1	FvH4_3g34290.1	100	0	2816
TRINITY_DN1387_c0_g3	TRINITY_DN1387_c0_g3_i1	FvH4_2g33690.1	100	7e-84	263
TRINITY_DN1387_c1_g1	TRINITY_DN1387_c1_g1_i1	FvH4_4g18790.1	100	3e-72	241
TRINITY_DN13877_c0_g1	TRINITY_DN13877_c0_g1_i2	FvH4_6g36940.1	100	2e-172	504
TRINITY_DN13882_c0_g1	TRINITY_DN13882_c0_g1_i1	FvH4_6g20940.1	100	2e-88	271
TRINITY_DN13886_c0_g1	TRINITY_DN13886_c0_g1_i1	FvH4_6g27710.1	100	1e-156	451
TRINITY_DN13888_c0_g2	TRINITY_DN13888_c0_g2_i3	FvH4_2g33320.1	100	2e-102	324
TRINITY_DN13890_c0_g1	TRINITY_DN13890_c0_g1_i2	FvH4_2g38110.1	100	0	786
TRINITY_DN13892_c0_g1	TRINITY_DN13892_c0_g1_i1	FvH4_2g13070.1	100	5e-52	179
TRINITY_DN13893_c0_g1	TRINITY_DN13893_c0_g1_i1	FvH4_4g23980.1	100	7e-142	404
TRINITY_DN139_c0_g1	TRINITY_DN139_c0_g1_i5	FvH4_4g32710.1	100	3e-55	182
TRINITY_DN1390_c1_g2	TRINITY_DN1390_c1_g2_i2	FvH4_3g36200.1	100	0	846
TRINITY_DN1390_c3_g1	TRINITY_DN1390_c3_g1_i1	FvH4_6g34320.1	100	7e-153	441
TRINITY_DN13907_c0_g1	TRINITY_DN13907_c0_g1_i2	FvH4_4g31670.1	100	0	648
TRINITY_DN13919_c0_g1	TRINITY_DN13919_c0_g1_i1	FvH4_6g15900.1	100	2e-111	337
TRINITY_DN1392_c0_g1	TRINITY_DN1392_c0_g1_i4	FvH4_1g08510.1	100	0	816
TRINITY_DN13923_c0_g1	TRINITY_DN13923_c0_g1_i1	FvH4_5g00430.1	100	7e-142	405
TRINITY_DN13926_c0_g2	TRINITY_DN13926_c0_g2_i1	FvH4_1g20250.1	100	0	1098
TRINITY_DN1393_c0_g1	TRINITY_DN1393_c0_g1_i2	FvH4_5g00620.1	100	0	817
TRINITY_DN1393_c0_g2	TRINITY_DN1393_c0_g2_i1	FvH4_7g11540.1	100	0	749
TRINITY_DN1393_c1_g1	TRINITY_DN1393_c1_g1_i2	FvH4_3g29040.1	100	4e-172	496
TRINITY_DN13933_c0_g1	TRINITY_DN13933_c0_g1_i1	FvH4_3g00100.1	100	0	1381
TRINITY_DN13938_c0_g1	TRINITY_DN13938_c0_g1_i1	FvH4_2g35390.1	100	1e-125	366
TRINITY_DN1394_c0_g1	TRINITY_DN1394_c0_g1_i1	FvH4_5g24780.1	100	0	615
TRINITY_DN13948_c0_g1	TRINITY_DN13948_c0_g1_i2	FvH4_7g27580.1	100	9e-103	305
TRINITY_DN1395_c0_g1	TRINITY_DN1395_c0_g1_i2	FvH4_1g08440.1	100	0	622
TRINITY_DN13956_c0_g1	TRINITY_DN13956_c0_g1_i1	FvH4_6g27510.1	100	0	1398
TRINITY_DN13959_c0_g1	TRINITY_DN13959_c0_g1_i2	FvH4_7g34030.1	100	0	801
TRINITY_DN13960_c0_g1	TRINITY_DN13960_c0_g1_i1	FvH4_4g29850.1	100	0	749
TRINITY_DN139607_c0_g1	TRINITY_DN139607_c0_g1_i1	FvH4_1g11880.1	100	8e-83	246
TRINITY_DN13965_c0_g1	TRINITY_DN13965_c0_g1_i1	FvH4_2g38240.1	100	0	1674
TRINITY_DN13967_c0_g1	TRINITY_DN13967_c0_g1_i1	FvH4_2g24330.1	100	0	801
TRINITY_DN13971_c0_g1	TRINITY_DN13971_c0_g1_i1	FvH4_2g36340.1	100	0	527
TRINITY_DN13982_c0_g1	TRINITY_DN13982_c0_g1_i1	FvH4_7g14900.1	100	4e-116	347
TRINITY_DN13985_c0_g1	TRINITY_DN13985_c0_g1_i1	FvH4_5g23140.1	100	0	943
TRINITY_DN13988_c0_g1	TRINITY_DN13988_c0_g1_i2	FvH4_3g41580.1	100	0	1932
TRINITY_DN13997_c0_g2	TRINITY_DN13997_c0_g2_i2	FvH4_7g01280.1	100	0	2506
TRINITY_DN139995_c0_g2	TRINITY_DN139995_c0_g2_i1	FvH4_5g03510.1	100	8e-102	302
TRINITY_DN140_c0_g1	TRINITY_DN140_c0_g1_i7	FvH4_5g23450.1	100	0	1852
TRINITY_DN140_c0_g4	TRINITY_DN140_c0_g4_i1	FvH4_5g23470.1	100	0	1848
TRINITY_DN1401_c0_g1	TRINITY_DN1401_c0_g1_i2	FvH4_7g20090.1	100	4e-24	98.6
TRINITY_DN14010_c0_g1	TRINITY_DN14010_c0_g1_i1	FvH4_4g30850.1	100	1e-97	289
TRINITY_DN14011_c1_g12	TRINITY_DN14011_c1_g1_i12	FvH4_1g29200.1	100	0	770
TRINITY_DN14013_c0_g1	TRINITY_DN14013_c0_g1_i1	FvH4_1g26180.1	100	0	545
TRINITY_DN14014_c0_g1	TRINITY_DN14014_c0_g1_i1	FvH4_2g12520.1	100	6e-37	126
TRINITY_DN14020_c0_g1	TRINITY_DN14020_c0_g1_i5	FvH4_6g45190.1	100	0	547
TRINITY_DN14021_c0_g12	TRINITY_DN14021_c0_g1_i12	FvH4_2g32000.1	100	3e-127	291
TRINITY_DN14023_c0_g1	TRINITY_DN14023_c0_g1_i1	FvH4_4g25330.1	100	9e-117	349
TRINITY_DN14027_c0_g1	TRINITY_DN14027_c0_g1_i2	FvH4_6g43790.1	100	0	1011
TRINITY_DN1403_c0_g2	TRINITY_DN1403_c0_g2_i1	FvH4_3g38910.1	100	4e-67	207
TRINITY_DN14033_c0_g3	TRINITY_DN14033_c0_g3_i2	FvH4_3g19260.1	100	1e-165	501
TRINITY_DN140335_c0_g1	TRINITY_DN140335_c0_g1_i1	FvH4_3g08940.1	100	5e-122	346
TRINITY_DN140360_c0_g1	TRINITY_DN140360_c0_g1_i1	FvH4_1g18590.1	100	0	742
TRINITY_DN1404_c0_g2	TRINITY_DN1404_c0_g2_i1	FvH4_6g34640.1	100	0	698
TRINITY_DN1404_c1_g3	TRINITY_DN1404_c1_g3_i2	FvH4_3g34660.1	100	3e-24	94.4
TRINITY_DN14042_c0_g11	TRINITY_DN14042_c0_g1_i21	FvH4_3g39300.1	100	0	1852
TRINITY_DN14044_c1_g1	TRINITY_DN14044_c1_g1_i2	FvH4_5g13970.1	100	4e-12	62.8
TRINITY_DN140596_c0_g1	TRINITY_DN140596_c0_g1_i1	FvH4_2g31140.1	100	0	756
TRINITY_DN14067_c0_g1	TRINITY_DN14067_c0_g1_i1	FvH4_3g31020.1	100	6e-62	192
TRINITY_DN14069_c0_g1	TRINITY_DN14069_c0_g1_i1	FvH4_6g18280.1	100	0	1018
TRINITY_DN14073_c0_g1	TRINITY_DN14073_c0_g1_i3	FvH4_6g46450.1	100	0	1105
TRINITY_DN14077_c0_g1	TRINITY_DN14077_c0_g1_i2	FvH4_3g01310.1	100	0	546
TRINITY_DN14083_c0_g1	TRINITY_DN14083_c0_g1_i1	FvH4_5g22500.1	100	6e-27	101
TRINITY_DN14083_c0_g2	TRINITY_DN14083_c0_g2_i1	FvH4_5g22490.1	100	0	654
TRINITY_DN140839_c0_g1	TRINITY_DN140839_c0_g1_i1	FvH4_5g28720.1	100	0	761
TRINITY_DN14088_c0_g1	TRINITY_DN14088_c0_g1_i3	FvH4_4g05140.1	100	4e-172	489
TRINITY_DN14089_c0_g1	TRINITY_DN14089_c0_g1_i1	FvH4_4g30980.1	100	0	851
TRINITY_DN1409_c0_g1	TRINITY_DN1409_c0_g1_i3	FvH4_7g32170.1	100	1e-179	519
TRINITY_DN1409_c0_g2	TRINITY_DN1409_c0_g2_i2	FvH4_7g17000.1	100	1e-180	525
TRINITY_DN14090_c0_g1	TRINITY_DN14090_c0_g1_i2	FvH4_4g26260.1	100	0	1467
TRINITY_DN14092_c0_g1	TRINITY_DN14092_c0_g1_i1	FvH4_2g15040.1	100	0	605
TRINITY_DN14096_c0_g1	TRINITY_DN14096_c0_g1_i1	FvH4_1g26770.1	100	0	803
TRINITY_DN14097_c0_g1	TRINITY_DN14097_c0_g1_i1	FvH4_2g08410.1	100	7e-55	175
TRINITY_DN1410_c3_g1	TRINITY_DN1410_c3_g1_i2	FvH4_5g19980.1	100	0	1107
TRINITY_DN14103_c0_g1	TRINITY_DN14103_c0_g1_i1	FvH4_4g26440.1	100	0	2271
TRINITY_DN141046_c0_g1	TRINITY_DN141046_c0_g1_i1	FvH4_1g29710.1	100	0	637
TRINITY_DN1411_c0_g11	TRINITY_DN1411_c0_g1_i11	FvH4_4g13490.1	100	0	1811
TRINITY_DN14117_c0_g1	TRINITY_DN14117_c0_g1_i1	FvH4_3g12220.1	100	2e-113	329
TRINITY_DN1412_c0_g2	TRINITY_DN1412_c0_g2_i3	FvH4_5g36080.1	100	2e-22	91.7
TRINITY_DN1412_c2_g1	TRINITY_DN1412_c2_g1_i1	FvH4_2g09720.1	100	0	528
TRINITY_DN1412_c2_g3	TRINITY_DN1412_c2_g3_i3	FvH4_2g00430.1	100	0	1241
TRINITY_DN14129_c0_g2	TRINITY_DN14129_c0_g2_i1	FvH4_6g14670.1	100	0	1168
TRINITY_DN141301_c0_g1	TRINITY_DN141301_c0_g1_i1	FvH4_4g32530.1	100	0	800
TRINITY_DN141336_c0_g1	TRINITY_DN141336_c0_g1_i1	FvH4_6g29930.1	100	6e-114	333
TRINITY_DN1414_c1_g1	TRINITY_DN1414_c1_g1_i3	FvH4_1g28630.1	100	0	2502
TRINITY_DN1414_c1_g2	TRINITY_DN1414_c1_g2_i1	FvH4_4g04860.1	100	2e-176	501
TRINITY_DN14166_c0_g1	TRINITY_DN14166_c0_g1_i4	FvH4_3g04850.1	100	0	722
TRINITY_DN1417_c0_g1	TRINITY_DN1417_c0_g1_i2	FvH4_2g13750.1	100	0	1204
TRINITY_DN141789_c0_g1	TRINITY_DN141789_c0_g1_i1	FvH4_2g10100.1	100	4e-85	255
TRINITY_DN1418_c0_g1	TRINITY_DN1418_c0_g1_i2	FvH4_3g23440.1	100	4e-99	311
TRINITY_DN1418_c0_g2	TRINITY_DN1418_c0_g2_i1	FvH4_5g19800.1	100	0	535
TRINITY_DN14187_c0_g1	TRINITY_DN14187_c0_g1_i1	FvH4_2g32650.1	100	9e-167	473
TRINITY_DN1419_c0_g1	TRINITY_DN1419_c0_g1_i1	FvH4_1g11490.1	100	0	549
TRINITY_DN14191_c0_g1	TRINITY_DN14191_c0_g1_i1	FvH4_5g15030.1	100	0	1729
TRINITY_DN14198_c0_g2	TRINITY_DN14198_c0_g2_i2	FvH4_6g18160.1	100	2e-61	198
TRINITY_DN142_c1_g1	TRINITY_DN142_c1_g1_i6	FvH4_5g06660.1	100	8e-173	523
TRINITY_DN142_c2_g1	TRINITY_DN142_c2_g1_i1	FvH4_5g28900.1	100	0	2201
TRINITY_DN142_c3_g1	TRINITY_DN142_c3_g1_i2	FvH4_4g25390.1	100	0	945
TRINITY_DN14210_c0_g1	TRINITY_DN14210_c0_g1_i3	FvH4_7g15780.1	100	8e-167	488
TRINITY_DN1422_c0_g1	TRINITY_DN1422_c0_g1_i1	FvH4_2g35460.1	100	6e-36	132
TRINITY_DN14222_c0_g1	TRINITY_DN14222_c0_g1_i2	FvH4_4g26790.1	100	3e-120	370
TRINITY_DN14222_c1_g1	TRINITY_DN14222_c1_g1_i2	FvH4_1g03900.1	100	0	798
TRINITY_DN1423_c0_g1	TRINITY_DN1423_c0_g1_i1	FvH4_5g04470.1	100	8e-166	478
TRINITY_DN1423_c0_g2	TRINITY_DN1423_c0_g2_i1	FvH4_1g21210.1	100	0	527
TRINITY_DN1424_c0_g1	TRINITY_DN1424_c0_g1_i2	FvH4_6g28850.1	100	2e-143	414
TRINITY_DN14242_c0_g1	TRINITY_DN14242_c0_g1_i1	FvH4_1g27310.1	100	3e-67	202
TRINITY_DN14258_c0_g1	TRINITY_DN14258_c0_g1_i1	FvH4_2g21340.1	100	2e-150	428
TRINITY_DN142606_c0_g1	TRINITY_DN142606_c0_g1_i1	FvH4_5g36210.1	100	2e-40	136
TRINITY_DN142608_c0_g1	TRINITY_DN142608_c0_g1_i1	FvH4_1g04800.1	100	0	901
TRINITY_DN14269_c0_g1	TRINITY_DN14269_c0_g1_i1	FvH4_4g34260.1	100	0	1141
TRINITY_DN142712_c0_g1	TRINITY_DN142712_c0_g1_i1	FvH4_6g08940.1	100	0	521
TRINITY_DN14272_c0_g1	TRINITY_DN14272_c0_g1_i2	FvH4_1g25000.1	100	0	750
TRINITY_DN14291_c0_g1	TRINITY_DN14291_c0_g1_i2	FvH4_6g31650.1	100	9e-152	454
TRINITY_DN14306_c0_g1	TRINITY_DN14306_c0_g1_i3	FvH4_4g23630.1	100	0	351
TRINITY_DN14309_c0_g2	TRINITY_DN14309_c0_g2_i1	FvH4_1g06870.1	100	0	2032
TRINITY_DN1432_c0_g3	TRINITY_DN1432_c0_g3_i1	FvH4_4g31050.1	100	0	1047
TRINITY_DN14342_c0_g1	TRINITY_DN14342_c0_g1_i1	FvH4_5g26600.1	100	3e-131	385
TRINITY_DN14350_c0_g1	TRINITY_DN14350_c0_g1_i4	FvH4_6g19650.1	100	0	812
TRINITY_DN14351_c0_g1	TRINITY_DN14351_c0_g1_i1	FvH4_4g32840.1	100	0	922
TRINITY_DN14353_c0_g1	TRINITY_DN14353_c0_g1_i1	FvH4_4g15050.1	100	0	969
TRINITY_DN1436_c2_g1	TRINITY_DN1436_c2_g1_i1	FvH4_7g17930.1	100	7e-169	495
TRINITY_DN14361_c0_g2	TRINITY_DN14361_c0_g2_i9	FvH4_7g12570.1	100	0	637
TRINITY_DN14363_c0_g1	TRINITY_DN14363_c0_g1_i3	FvH4_4g11630.1	100	3e-50	168
TRINITY_DN14364_c0_g1	TRINITY_DN14364_c0_g1_i2	FvH4_2g13680.1	100	0	716
TRINITY_DN14368_c0_g1	TRINITY_DN14368_c0_g1_i1	FvH4_3g13280.1	100	1e-33	122
TRINITY_DN1437_c4_g1	TRINITY_DN1437_c4_g1_i1	FvH4_3g25500.1	100	0	799
TRINITY_DN14370_c0_g1	TRINITY_DN14370_c0_g1_i3	FvH4_7g06600.1	100	2e-104	338
TRINITY_DN14371_c0_g1	TRINITY_DN14371_c0_g1_i1	FvH4_1g20240.1	100	1e-108	322
TRINITY_DN14374_c1_g1	TRINITY_DN14374_c1_g1_i3	FvH4_2g03600.1	100	4e-108	330
TRINITY_DN1439_c0_g1	TRINITY_DN1439_c0_g1_i1	FvH4_7g15350.1	100	1e-89	285
TRINITY_DN144_c0_g2	TRINITY_DN144_c0_g2_i1	FvH4_5g30810.1	100	7e-43	150
TRINITY_DN1440_c1_g1	TRINITY_DN1440_c1_g1_i1	FvH4_2g36010.1	100	8e-65	195
TRINITY_DN1440_c2_g1	TRINITY_DN1440_c2_g1_i2	FvH4_4g34970.1	100	1e-123	384
TRINITY_DN14404_c0_g1	TRINITY_DN14404_c0_g1_i2	FvH4_5g24980.1	100	1e-119	349
TRINITY_DN1441_c0_g1	TRINITY_DN1441_c0_g1_i4	FvH4_2g23890.1	100	0	694
TRINITY_DN1441_c1_g1	TRINITY_DN1441_c1_g1_i5	FvH4_7g09060.1	100	4e-30	113
TRINITY_DN1441_c2_g1	TRINITY_DN1441_c2_g1_i3	FvH4_6g25730.1	100	1e-147	449
TRINITY_DN14410_c0_g1	TRINITY_DN14410_c0_g1_i1	FvH4_6g16700.1	100	0	933
TRINITY_DN14416_c0_g1	TRINITY_DN14416_c0_g1_i1	FvH4_4g24000.1	100	0	2378
TRINITY_DN14427_c0_g1	TRINITY_DN14427_c0_g1_i2	FvH4_3g00900.1	100	0	796
TRINITY_DN144473_c0_g1	TRINITY_DN144473_c0_g1_i1	FvH4_3g40630.1	100	9e-96	281
TRINITY_DN1445_c0_g2	TRINITY_DN1445_c0_g2_i2	FvH4_7g12770.1	100	0	905
TRINITY_DN14460_c0_g1	TRINITY_DN14460_c0_g1_i1	FvH4_5g15260.1	100	5e-133	380
TRINITY_DN14469_c0_g1	TRINITY_DN14469_c0_g1_i2	FvH4_5g24890.1	100	0	910
TRINITY_DN1447_c0_g1	TRINITY_DN1447_c0_g1_i1	FvH4_5g12250.1	100	0	739
TRINITY_DN14472_c0_g1	TRINITY_DN14472_c0_g1_i1	FvH4_4g16740.1	100	9e-98	303
TRINITY_DN14477_c0_g1	TRINITY_DN14477_c0_g1_i1	FvH4_3g01610.1	100	0	1366
TRINITY_DN144790_c0_g1	TRINITY_DN144790_c0_g1_i2	FvH4_3g31570.1	100	4e-69	218
TRINITY_DN14480_c0_g1	TRINITY_DN14480_c0_g1_i1	FvH4_5g05770.1	100	0	1556
TRINITY_DN144815_c0_g1	TRINITY_DN144815_c0_g1_i2	FvH4_6g11300.1	100	2e-142	407
TRINITY_DN14488_c0_g1	TRINITY_DN14488_c0_g1_i1	FvH4_6g54150.1	100	7e-67	218
TRINITY_DN1449_c0_g1	TRINITY_DN1449_c0_g1_i3	FvH4_3g14040.1	100	1e-148	448
TRINITY_DN14490_c0_g1	TRINITY_DN14490_c0_g1_i1	FvH4_7g21040.1	100	1e-152	434
TRINITY_DN144907_c0_g1	TRINITY_DN144907_c0_g1_i1	FvH4_3g01660.1	100	3e-69	212
TRINITY_DN14495_c0_g1	TRINITY_DN14495_c0_g1_i1	FvH4_4g07310.1	100	3e-88	272
TRINITY_DN1451_c0_g12	TRINITY_DN1451_c0_g1_i12	FvH4_1g29070.1	100	0	896
TRINITY_DN1451_c2_g1	TRINITY_DN1451_c2_g1_i1	FvH4_5g20320.1	100	0	744
TRINITY_DN14515_c0_g1	TRINITY_DN14515_c0_g1_i4	FvH4_2g18200.1	100	0	879
TRINITY_DN1452_c0_g1	TRINITY_DN1452_c0_g1_i3	FvH4_7g13850.1	100	0	625
TRINITY_DN1452_c0_g3	TRINITY_DN1452_c0_g3_i1	FvH4_1g12330.1	100	0	995
TRINITY_DN14523_c0_g2	TRINITY_DN14523_c0_g2_i3	FvH4_1g10920.1	100	8e-108	339
TRINITY_DN14529_c0_g1	TRINITY_DN14529_c0_g1_i1	FvH4_4g32300.1	100	0	1271
TRINITY_DN145401_c0_g1	TRINITY_DN145401_c0_g1_i1	FvH4_1g29750.1	100	7e-139	394
TRINITY_DN14545_c0_g1	TRINITY_DN14545_c0_g1_i1	FvH4_7g27010.1	100	0	512
TRINITY_DN145485_c0_g2	TRINITY_DN145485_c0_g2_i1	FvH4_6g54470.1	100	0	718
TRINITY_DN1456_c0_g1	TRINITY_DN1456_c0_g1_i3	FvH4_2g22300.1	100	3e-141	427
TRINITY_DN1456_c1_g1	TRINITY_DN1456_c1_g1_i1	FvH4_1g01200.1	100	1e-145	437
TRINITY_DN1456_c1_g20	TRINITY_DN1456_c1_g2_i10	FvH4_1g23090.1	100	1e-14	72.4
TRINITY_DN14564_c0_g1	TRINITY_DN14564_c0_g1_i1	FvH4_4g15150.1	100	0	1070
TRINITY_DN14565_c0_g1	TRINITY_DN14565_c0_g1_i1	FvH4_2g32940.1	100	0	702
TRINITY_DN14576_c0_g1	TRINITY_DN14576_c0_g1_i4	FvH4_5g16140.1	100	1e-10	55.1
TRINITY_DN14588_c0_g1	TRINITY_DN14588_c0_g1_i1	FvH4_7g31070.1	100	4e-64	201
TRINITY_DN14590_c0_g10	TRINITY_DN14590_c0_g1_i10	FvH4_4g31270.1	100	0	1293
TRINITY_DN14594_c0_g2	TRINITY_DN14594_c0_g2_i2	FvH4_1g24320.1	100	0	1172
TRINITY_DN146_c1_g1	TRINITY_DN146_c1_g1_i1	FvH4_3g36640.1	100	0	1803
TRINITY_DN146_c2_g1	TRINITY_DN146_c2_g1_i9	FvH4_3g43470.1	100	0	1093
TRINITY_DN14602_c0_g1	TRINITY_DN14602_c0_g1_i1	FvH4_1g13120.1	100	0	1080
TRINITY_DN1461_c0_g1	TRINITY_DN1461_c0_g1_i5	FvH4_1g23310.1	100	2e-96	302
TRINITY_DN1461_c1_g1	TRINITY_DN1461_c1_g1_i1	FvH4_1g21170.1	100	5e-35	120
TRINITY_DN14622_c0_g1	TRINITY_DN14622_c0_g1_i2	FvH4_6g41190.1	100	2e-70	221
TRINITY_DN1463_c0_g1	TRINITY_DN1463_c0_g1_i7	FvH4_6g13970.1	100	0	547
TRINITY_DN14631_c0_g1	TRINITY_DN14631_c0_g1_i2	FvH4_4g07920.1	100	0	1635
TRINITY_DN14658_c0_g1	TRINITY_DN14658_c0_g1_i2	FvH4_5g15890.1	100	0	764
TRINITY_DN1466_c1_g1	TRINITY_DN1466_c1_g1_i1	FvH4_5g12900.1	100	0	608
TRINITY_DN14661_c0_g1	TRINITY_DN14661_c0_g1_i3	FvH4_2g20860.1	100	0	1107
TRINITY_DN1467_c0_g19	TRINITY_DN1467_c0_g1_i19	FvH4_3g22890.1	100	2e-98	316
TRINITY_DN1467_c1_g1	TRINITY_DN1467_c1_g1_i5	FvH4_6g30920.1	100	0	1431
TRINITY_DN14675_c0_g2	TRINITY_DN14675_c0_g2_i4	FvH4_6g24480.1	100	0	801
TRINITY_DN14691_c0_g1	TRINITY_DN14691_c0_g1_i6	FvH4_4g16500.1	100	0	1447
TRINITY_DN14694_c0_g5	TRINITY_DN14694_c0_g5_i1	FvH4_7g18470.1	100	0	735
TRINITY_DN14694_c1_g2	TRINITY_DN14694_c1_g2_i1	FvH4_7g06750.1	100	0	707
TRINITY_DN14696_c0_g1	TRINITY_DN14696_c0_g1_i1	FvH4_7g23730.1	100	0	811
TRINITY_DN147_c0_g1	TRINITY_DN147_c0_g1_i1	FvH4_2g41410.1	100	9e-171	493
TRINITY_DN147_c0_g2	TRINITY_DN147_c0_g2_i3	FvH4_2g18940.1	100	0	1358
TRINITY_DN147_c0_g3	TRINITY_DN147_c0_g3_i2	FvH4_1g11150.1	100	0	643
TRINITY_DN147_c0_g4	TRINITY_DN147_c0_g4_i1	FvH4_2g19580.1	100	8e-92	275
TRINITY_DN147_c1_g2	TRINITY_DN147_c1_g2_i2	FvH4_1g06040.1	100	9e-159	460
TRINITY_DN1471_c0_g1	TRINITY_DN1471_c0_g1_i2	FvH4_3g01140.1	100	0	767
TRINITY_DN14711_c0_g1	TRINITY_DN14711_c0_g1_i3	FvH4_4g33060.1	100	3e-119	355
TRINITY_DN1472_c0_g1	TRINITY_DN1472_c0_g1_i3	FvH4_3g12780.1	100	0	543
TRINITY_DN14722_c1_g1	TRINITY_DN14722_c1_g1_i1	FvH4_5g21440.1	100	0	704
TRINITY_DN14727_c0_g1	TRINITY_DN14727_c0_g1_i1	FvH4_3g05170.1	100	0	1349
TRINITY_DN14730_c0_g2	TRINITY_DN14730_c0_g2_i2	FvH4_2g40670.1	100	0	978
TRINITY_DN1474_c0_g1	TRINITY_DN1474_c0_g1_i1	FvH4_6g11370.1	100	5e-50	159
TRINITY_DN14743_c0_g5	TRINITY_DN14743_c0_g5_i1	FvH4_2g09010.1	100	8e-18	79.3
TRINITY_DN14746_c0_g1	TRINITY_DN14746_c0_g1_i4	FvH4_6g30290.1	100	2e-136	410
TRINITY_DN14749_c0_g1	TRINITY_DN14749_c0_g1_i3	FvH4_3g11870.1	100	4e-113	351
TRINITY_DN1475_c0_g11	TRINITY_DN1475_c0_g1_i11	FvH4_1g25930.1	100	0	2229
TRINITY_DN14755_c1_g1	TRINITY_DN14755_c1_g1_i1	FvH4_2g06540.1	100	0	599
TRINITY_DN1476_c0_g1	TRINITY_DN1476_c0_g1_i1	FvH4_1g05540.1	100	3e-99	324
TRINITY_DN14764_c0_g1	TRINITY_DN14764_c0_g1_i2	FvH4_4g12450.1	100	0	820
TRINITY_DN14766_c0_g1	TRINITY_DN14766_c0_g1_i1	FvH4_2g27490.1	100	0	712
TRINITY_DN14770_c0_g1	TRINITY_DN14770_c0_g1_i5	FvH4_1g20900.1	100	1e-64	211
TRINITY_DN14772_c0_g1	TRINITY_DN14772_c0_g1_i1	FvH4_1g13640.1	100	0	521
TRINITY_DN14775_c0_g1	TRINITY_DN14775_c0_g1_i6	FvH4_4g01670.1	100	0	1900
TRINITY_DN1478_c0_g2	TRINITY_DN1478_c0_g2_i1	FvH4_1g29960.1	100	0	710
TRINITY_DN14780_c0_g1	TRINITY_DN14780_c0_g1_i4	FvH4_6g54080.1	100	0	854
TRINITY_DN14781_c0_g1	TRINITY_DN14781_c0_g1_i1	FvH4_1g03040.1	100	1e-124	360
TRINITY_DN14784_c0_g1	TRINITY_DN14784_c0_g1_i1	FvH4_5g07620.1	100	8e-24	92.8
TRINITY_DN14787_c0_g1	TRINITY_DN14787_c0_g1_i1	FvH4_7g16690.1	100	3e-56	190
TRINITY_DN14788_c0_g1	TRINITY_DN14788_c0_g1_i1	FvH4_3g32220.1	100	5e-82	254
TRINITY_DN14791_c0_g1	TRINITY_DN14791_c0_g1_i1	FvH4_3g44720.1	100	1e-25	99.8
TRINITY_DN148_c0_g1	TRINITY_DN148_c0_g1_i1	FvH4_4g14110.1	100	0	800
TRINITY_DN148_c0_g2	TRINITY_DN148_c0_g2_i5	FvH4_3g46020.1	100	3e-34	127
TRINITY_DN14800_c0_g1	TRINITY_DN14800_c0_g1_i2	FvH4_6g30150.1	100	1e-76	241
TRINITY_DN14827_c0_g3	TRINITY_DN14827_c0_g3_i1	FvH4_6g31390.1	100	3e-40	145
TRINITY_DN14831_c0_g3	TRINITY_DN14831_c0_g3_i1	FvH4_3g09960.1	100	3e-147	418
TRINITY_DN14844_c0_g1	TRINITY_DN14844_c0_g1_i5	FvH4_5g25900.1	100	0	1174
TRINITY_DN14867_c0_g1	TRINITY_DN14867_c0_g1_i2	FvH4_5g03430.1	100	9e-131	383
TRINITY_DN14869_c0_g1	TRINITY_DN14869_c0_g1_i3	FvH4_6g22040.1	100	0	1045
TRINITY_DN1487_c1_g1	TRINITY_DN1487_c1_g1_i1	FvH4_2g08710.1	100	0	828
TRINITY_DN1487_c2_g1	TRINITY_DN1487_c2_g1_i1	FvH4_2g22100.1	100	4e-53	167
TRINITY_DN14870_c1_g1	TRINITY_DN14870_c1_g1_i1	FvH4_3g32700.1	100	9e-173	518
TRINITY_DN14876_c0_g1	TRINITY_DN14876_c0_g1_i1	FvH4_3g03660.1	100	0	618
TRINITY_DN14876_c1_g1	TRINITY_DN14876_c1_g1_i1	FvH4_4g22530.1	100	0	543
TRINITY_DN1488_c0_g1	TRINITY_DN1488_c0_g1_i2	FvH4_2g06910.1	100	0	716
TRINITY_DN14882_c0_g2	TRINITY_DN14882_c0_g2_i1	FvH4_3g13970.1	100	2e-87	263
TRINITY_DN14894_c0_g1	TRINITY_DN14894_c0_g1_i2	FvH4_6g12520.1	100	0	985
TRINITY_DN14897_c0_g1	TRINITY_DN14897_c0_g1_i2	FvH4_2g38030.1	100	1e-34	130
TRINITY_DN149_c0_g1	TRINITY_DN149_c0_g1_i1	FvH4_1g10850.1	100	0	763
TRINITY_DN14900_c0_g1	TRINITY_DN14900_c0_g1_i1	FvH4_3g18050.1	100	7e-52	170
TRINITY_DN14904_c0_g2	TRINITY_DN14904_c0_g2_i1	FvH4_3g35000.1	100	1e-46	152
TRINITY_DN14904_c0_g3	TRINITY_DN14904_c0_g3_i1	FvH4_3g34990.1	100	0	764
TRINITY_DN14905_c0_g1	TRINITY_DN14905_c0_g1_i4	FvH4_c3g00060.1	100	2e-73	223
TRINITY_DN14906_c0_g1	TRINITY_DN14906_c0_g1_i2	FvH4_2g37780.1	100	0	936
TRINITY_DN14908_c0_g1	TRINITY_DN14908_c0_g1_i3	FvH4_1g17350.1	100	0	667
TRINITY_DN14916_c0_g1	TRINITY_DN14916_c0_g1_i1	FvH4_2g27550.1	100	0	937
TRINITY_DN14926_c0_g2	TRINITY_DN14926_c0_g2_i1	FvH4_6g41240.1	100	0	617
TRINITY_DN1494_c0_g1	TRINITY_DN1494_c0_g1_i3	FvH4_3g06230.1	100	6e-61	201
TRINITY_DN14943_c0_g1	TRINITY_DN14943_c0_g1_i2	FvH4_3g22410.1	100	7e-55	179
TRINITY_DN1495_c0_g2	TRINITY_DN1495_c0_g2_i1	FvH4_6g40200.1	100	0	986
TRINITY_DN149564_c0_g1	TRINITY_DN149564_c0_g1_i1	FvH4_7g30960.1	100	5e-78	230
TRINITY_DN14961_c0_g1	TRINITY_DN14961_c0_g1_i1	FvH4_2g38290.1	100	6e-39	139
TRINITY_DN14970_c0_g1	TRINITY_DN14970_c0_g1_i1	FvH4_5g25940.1	100	0	680
TRINITY_DN149759_c0_g1	TRINITY_DN149759_c0_g1_i2	FvH4_7g28160.1	100	3e-134	398
TRINITY_DN14976_c0_g1	TRINITY_DN14976_c0_g1_i1	FvH4_5g11870.1	100	3e-166	485
TRINITY_DN1498_c2_g1	TRINITY_DN1498_c2_g1_i2	FvH4_1g23740.1	100	0	791
TRINITY_DN1498_c3_g2	TRINITY_DN1498_c3_g2_i1	FvH4_3g35930.1	100	0	886
TRINITY_DN14984_c0_g2	TRINITY_DN14984_c0_g2_i1	FvH4_3g05570.1	100	0	699
TRINITY_DN15_c1_g1	TRINITY_DN15_c1_g1_i2	FvH4_6g50610.1	100	0	955
TRINITY_DN15005_c0_g1	TRINITY_DN15005_c0_g1_i3	FvH4_6g07090.1	100	4e-79	256
TRINITY_DN15007_c0_g1	TRINITY_DN15007_c0_g1_i2	FvH4_1g08950.1	100	0	844
TRINITY_DN150162_c1_g1	TRINITY_DN150162_c1_g1_i1	FvH4_5g25920.1	100	2e-117	345
TRINITY_DN15017_c0_g2	TRINITY_DN15017_c0_g2_i1	FvH4_3g05480.1	100	0	1546
TRINITY_DN15021_c0_g1	TRINITY_DN15021_c0_g1_i1	FvH4_6g36810.1	100	6e-156	455
TRINITY_DN15031_c0_g1	TRINITY_DN15031_c0_g1_i2	FvH4_3g38050.1	100	2e-107	325
TRINITY_DN15033_c0_g1	TRINITY_DN15033_c0_g1_i1	FvH4_6g20390.1	100	0	820
TRINITY_DN1504_c1_g2	TRINITY_DN1504_c1_g2_i1	FvH4_2g13190.1	100	0	710
TRINITY_DN1504_c2_g1	TRINITY_DN1504_c2_g1_i4	FvH4_3g22880.1	100	3e-178	532
TRINITY_DN150422_c0_g1	TRINITY_DN150422_c0_g1_i1	FvH4_7g09300.1	100	2e-28	103
TRINITY_DN15044_c0_g1	TRINITY_DN15044_c0_g1_i1	FvH4_1g11970.1	100	0	534
TRINITY_DN15053_c0_g1	TRINITY_DN15053_c0_g1_i1	FvH4_1g06700.1	100	1e-144	417
TRINITY_DN15065_c0_g1	TRINITY_DN15065_c0_g1_i1	FvH4_2g16940.1	100	0	718
TRINITY_DN15066_c0_g1	TRINITY_DN15066_c0_g1_i8	FvH4_6g08400.1	100	0	790
TRINITY_DN1507_c4_g1	TRINITY_DN1507_c4_g1_i1	FvH4_7g30170.1	100	0	1620
TRINITY_DN15078_c0_g1	TRINITY_DN15078_c0_g1_i2	FvH4_3g43030.1	100	0	655
TRINITY_DN15078_c1_g1	TRINITY_DN15078_c1_g1_i1	FvH4_6g41230.1	100	0	842
TRINITY_DN1508_c2_g1	TRINITY_DN1508_c2_g1_i1	FvH4_3g05500.1	100	1e-122	353
TRINITY_DN15088_c0_g1	TRINITY_DN15088_c0_g1_i1	FvH4_2g14400.1	100	8e-173	487
TRINITY_DN15090_c0_g1	TRINITY_DN15090_c0_g1_i1	FvH4_4g18480.1	100	4e-56	182
TRINITY_DN15095_c0_g1	TRINITY_DN15095_c0_g1_i2	FvH4_2g09630.1	100	0	633
TRINITY_DN15099_c0_g1	TRINITY_DN15099_c0_g1_i1	FvH4_6g29370.1	100	6e-92	286
TRINITY_DN151_c0_g3	TRINITY_DN151_c0_g3_i2	FvH4_4g07200.1	100	0	786
TRINITY_DN151_c0_g4	TRINITY_DN151_c0_g4_i1	FvH4_6g32270.1	100	9e-136	394
TRINITY_DN151_c1_g1	TRINITY_DN151_c1_g1_i1	FvH4_1g28740.1	100	0	922
TRINITY_DN15100_c0_g1	TRINITY_DN15100_c0_g1_i1	FvH4_3g02220.1	100	2e-78	242
TRINITY_DN15102_c0_g1	TRINITY_DN15102_c0_g1_i2	FvH4_5g04630.1	100	1e-142	422
TRINITY_DN1511_c1_g1	TRINITY_DN1511_c1_g1_i1	FvH4_3g05680.1	100	0	756
TRINITY_DN1511_c2_g1	TRINITY_DN1511_c2_g1_i1	FvH4_6g21760.1	100	1e-150	432
TRINITY_DN15114_c1_g1	TRINITY_DN15114_c1_g1_i2	FvH4_5g09000.1	100	5e-158	446
TRINITY_DN15119_c0_g1	TRINITY_DN15119_c0_g1_i1	FvH4_1g06420.1	100	0	710
TRINITY_DN151215_c0_g1	TRINITY_DN151215_c0_g1_i3	FvH4_2g32900.1	100	6e-48	163
TRINITY_DN15124_c0_g1	TRINITY_DN15124_c0_g1_i2	FvH4_6g18310.1	100	2e-70	226
TRINITY_DN1513_c0_g1	TRINITY_DN1513_c0_g1_i2	FvH4_6g46040.1	100	0	972
TRINITY_DN15131_c0_g1	TRINITY_DN15131_c0_g1_i1	FvH4_3g04930.1	100	0	656
TRINITY_DN15149_c0_g1	TRINITY_DN15149_c0_g1_i2	FvH4_2g10030.1	100	7e-29	110
TRINITY_DN1515_c4_g1	TRINITY_DN1515_c4_g1_i1	FvH4_7g15950.1	100	3e-51	168
TRINITY_DN1516_c0_g1	TRINITY_DN1516_c0_g1_i2	FvH4_4g19190.1	100	3e-54	188
TRINITY_DN15163_c0_g1	TRINITY_DN15163_c0_g1_i2	FvH4_5g17940.1	100	0	1905
TRINITY_DN15171_c0_g1	TRINITY_DN15171_c0_g1_i2	FvH4_1g16420.1	100	6e-118	351
TRINITY_DN15176_c0_g1	TRINITY_DN15176_c0_g1_i2	FvH4_5g13720.1	100	5e-82	260
TRINITY_DN15177_c0_g1	TRINITY_DN15177_c0_g1_i1	FvH4_6g12430.1	100	0	966
TRINITY_DN15180_c0_g1	TRINITY_DN15180_c0_g1_i1	FvH4_4g03440.1	100	0	598
TRINITY_DN15182_c0_g1	TRINITY_DN15182_c0_g1_i1	FvH4_1g00300.1	100	0	811
TRINITY_DN15183_c0_g1	TRINITY_DN15183_c0_g1_i1	FvH4_1g20100.1	100	0	739
TRINITY_DN15184_c0_g1	TRINITY_DN15184_c0_g1_i1	FvH4_2g02070.1	100	4e-36	131
TRINITY_DN151864_c0_g1	TRINITY_DN151864_c0_g1_i1	FvH4_4g35860.1	100	3e-170	475
TRINITY_DN15196_c0_g1	TRINITY_DN15196_c0_g1_i2	FvH4_6g09570.1	100	2e-120	355
TRINITY_DN15200_c0_g1	TRINITY_DN15200_c0_g1_i1	FvH4_4g25460.1	100	2e-71	219
TRINITY_DN15211_c0_g2	TRINITY_DN15211_c0_g2_i1	FvH4_4g09720.1	100	3e-45	147
TRINITY_DN1522_c0_g3	TRINITY_DN1522_c0_g3_i1	FvH4_1g13470.1	100	0	1015
TRINITY_DN1522_c1_g1	TRINITY_DN1522_c1_g1_i4	FvH4_7g11620.1	100	2e-161	458
TRINITY_DN15221_c0_g2	TRINITY_DN15221_c0_g2_i1	FvH4_6g21750.1	100	4e-80	247
TRINITY_DN15249_c0_g1	TRINITY_DN15249_c0_g1_i2	FvH4_7g19800.1	100	2e-106	334
TRINITY_DN15257_c0_g2	TRINITY_DN15257_c0_g2_i1	FvH4_2g05450.1	100	0	654
TRINITY_DN15258_c0_g1	TRINITY_DN15258_c0_g1_i8	FvH4_5g28620.1	100	0	775
TRINITY_DN15259_c0_g11	TRINITY_DN15259_c0_g1_i11	FvH4_5g17900.1	100	0	649
TRINITY_DN1526_c0_g1	TRINITY_DN1526_c0_g1_i2	FvH4_5g03210.1	100	3e-124	370
TRINITY_DN15260_c0_g1	TRINITY_DN15260_c0_g1_i4	FvH4_7g17940.1	100	2e-45	118
TRINITY_DN15274_c0_g1	TRINITY_DN15274_c0_g1_i1	FvH4_3g37640.1	100	0	964
TRINITY_DN15279_c0_g1	TRINITY_DN15279_c0_g1_i2	FvH4_4g31510.1	100	8e-144	410
TRINITY_DN15283_c0_g1	TRINITY_DN15283_c0_g1_i1	FvH4_4g21870.1	100	1e-114	332
TRINITY_DN15289_c0_g1	TRINITY_DN15289_c0_g1_i2	FvH4_1g26150.1	100	0	753
TRINITY_DN1529_c0_g1	TRINITY_DN1529_c0_g1_i1	FvH4_2g08850.1	100	0	969
TRINITY_DN153_c0_g19	TRINITY_DN153_c0_g1_i29	FvH4_1g04130.1	100	0	855
TRINITY_DN153_c1_g1	TRINITY_DN153_c1_g1_i1	FvH4_5g15820.1	100	2e-100	326
TRINITY_DN1530_c0_g1	TRINITY_DN1530_c0_g1_i4	FvH4_5g25730.1	100	0	1278
TRINITY_DN1531_c0_g2	TRINITY_DN1531_c0_g2_i4	FvH4_6g06970.1	100	0	683
TRINITY_DN1531_c0_g3	TRINITY_DN1531_c0_g3_i1	FvH4_2g35600.1	100	0	578
TRINITY_DN15321_c0_g1	TRINITY_DN15321_c0_g1_i1	FvH4_1g22910.1	100	0	928
TRINITY_DN15326_c0_g1	TRINITY_DN15326_c0_g1_i1	FvH4_7g10340.1	100	2e-83	259
TRINITY_DN1533_c0_g1	TRINITY_DN1533_c0_g1_i4	FvH4_1g21700.1	100	3e-34	109
TRINITY_DN1533_c0_g2	TRINITY_DN1533_c0_g2_i1	FvH4_5g15570.1	100	0	1211
TRINITY_DN1533_c0_g5	TRINITY_DN1533_c0_g5_i1	FvH4_4g27770.1	100	0	868
TRINITY_DN15333_c0_g1	TRINITY_DN15333_c0_g1_i1	FvH4_4g33190.1	100	0	788
TRINITY_DN15334_c0_g1	TRINITY_DN15334_c0_g1_i1	FvH4_6g51890.1	100	0	804
TRINITY_DN15345_c0_g1	TRINITY_DN15345_c0_g1_i2	FvH4_3g21770.1	100	0	1694
TRINITY_DN15349_c0_g10	TRINITY_DN15349_c0_g1_i10	FvH4_3g19880.1	100	0	608
TRINITY_DN15349_c0_g3	TRINITY_DN15349_c0_g3_i1	FvH4_3g32690.1	100	6e-38	133
TRINITY_DN15358_c0_g1	TRINITY_DN15358_c0_g1_i1	FvH4_2g06140.1	100	2e-123	355
TRINITY_DN1536_c1_g2	TRINITY_DN1536_c1_g2_i4	FvH4_6g16490.1	100	0	937
TRINITY_DN1536_c3_g1	TRINITY_DN1536_c3_g1_i1	FvH4_6g16520.1	100	1e-95	279
TRINITY_DN15363_c0_g2	TRINITY_DN15363_c0_g2_i1	FvH4_2g09490.1	100	0	1142
TRINITY_DN1537_c0_g4	TRINITY_DN1537_c0_g4_i1	FvH4_6g26540.1	100	0	720
TRINITY_DN1537_c0_g5	TRINITY_DN1537_c0_g5_i3	FvH4_2g16810.1	100	0	1280
TRINITY_DN15377_c0_g1	TRINITY_DN15377_c0_g1_i1	FvH4_6g07120.1	100	1e-71	224
TRINITY_DN15378_c0_g1	TRINITY_DN15378_c0_g1_i2	FvH4_6g17390.1	100	0	1020
TRINITY_DN15380_c0_g1	TRINITY_DN15380_c0_g1_i2	FvH4_3g25810.1	100	2e-97	302
TRINITY_DN15380_c0_g4	TRINITY_DN15380_c0_g4_i2	FvH4_4g06050.1	100	0	640
TRINITY_DN15384_c0_g1	TRINITY_DN15384_c0_g1_i1	FvH4_4g18340.1	100	6e-37	136
TRINITY_DN15389_c0_g1	TRINITY_DN15389_c0_g1_i3	FvH4_2g26120.1	100	0	1208
TRINITY_DN15389_c0_g2	TRINITY_DN15389_c0_g2_i1	FvH4_4g18800.1	100	1e-101	305
TRINITY_DN15393_c0_g1	TRINITY_DN15393_c0_g1_i1	FvH4_6g34980.1	100	7e-75	230
TRINITY_DN15396_c1_g1	TRINITY_DN15396_c1_g1_i1	FvH4_5g25020.1	100	3e-113	324
TRINITY_DN15401_c0_g2	TRINITY_DN15401_c0_g2_i1	FvH4_6g10830.1	100	0	634
TRINITY_DN15402_c0_g1	TRINITY_DN15402_c0_g1_i2	FvH4_3g08450.1	100	0	1401
TRINITY_DN15409_c0_g1	TRINITY_DN15409_c0_g1_i1	FvH4_1g30470.1	100	7e-16	70.1
TRINITY_DN15410_c0_g1	TRINITY_DN15410_c0_g1_i1	FvH4_5g00120.1	100	2e-31	120
TRINITY_DN15415_c0_g1	TRINITY_DN15415_c0_g1_i1	FvH4_c1g00730.1	100	1e-47	159
TRINITY_DN15422_c0_g1	TRINITY_DN15422_c0_g1_i1	FvH4_5g39690.1	100	1e-24	100
TRINITY_DN15427_c0_g2	TRINITY_DN15427_c0_g2_i1	FvH4_6g28840.1	100	5e-161	463
TRINITY_DN1543_c0_g21	TRINITY_DN1543_c0_g2_i11	FvH4_7g23620.1	100	7e-34	132
TRINITY_DN15435_c0_g10	TRINITY_DN15435_c0_g1_i10	FvH4_2g08150.1	100	7e-52	172
TRINITY_DN1544_c0_g1	TRINITY_DN1544_c0_g1_i1	FvH4_6g42190.1	100	0	923
TRINITY_DN15444_c0_g1	TRINITY_DN15444_c0_g1_i2	FvH4_7g01500.1	100	0	555
TRINITY_DN15453_c0_g1	TRINITY_DN15453_c0_g1_i2	FvH4_3g12880.1	100	5e-12	59.3
TRINITY_DN1546_c0_g1	TRINITY_DN1546_c0_g1_i1	FvH4_7g11260.1	100	2e-145	417
TRINITY_DN15465_c0_g1	TRINITY_DN15465_c0_g1_i3	FvH4_7g14260.1	100	0	874
TRINITY_DN15480_c0_g1	TRINITY_DN15480_c0_g1_i1	FvH4_6g10740.1	100	8e-134	392
TRINITY_DN15483_c0_g1	TRINITY_DN15483_c0_g1_i3	FvH4_2g14470.1	100	1e-164	494
TRINITY_DN15486_c0_g1	TRINITY_DN15486_c0_g1_i2	FvH4_7g00520.1	100	0	1518
TRINITY_DN15493_c0_g1	TRINITY_DN15493_c0_g1_i1	FvH4_1g05030.1	100	1e-38	135
TRINITY_DN154972_c0_g1	TRINITY_DN154972_c0_g1_i1	FvH4_3g28850.1	100	1e-162	463
TRINITY_DN155_c0_g2	TRINITY_DN155_c0_g2_i2	FvH4_6g31120.1	100	0	1071
TRINITY_DN15506_c0_g1	TRINITY_DN15506_c0_g1_i2	FvH4_7g29490.1	100	3e-89	262
TRINITY_DN15509_c0_g2	TRINITY_DN15509_c0_g2_i1	FvH4_6g31710.1	100	0	821
TRINITY_DN1551_c0_g1	TRINITY_DN1551_c0_g1_i2	FvH4_2g38460.1	100	0	562
TRINITY_DN1551_c1_g1	TRINITY_DN1551_c1_g1_i1	FvH4_6g12860.1	100	0	767
TRINITY_DN1551_c2_g2	TRINITY_DN1551_c2_g2_i1	FvH4_4g01530.1	100	1e-147	419
TRINITY_DN1551_c3_g1	TRINITY_DN1551_c3_g1_i2	FvH4_2g33150.1	100	0	662
TRINITY_DN15512_c0_g1	TRINITY_DN15512_c0_g1_i2	FvH4_2g39660.1	100	9e-53	177
TRINITY_DN1552_c0_g2	TRINITY_DN1552_c0_g2_i1	FvH4_7g32390.1	100	2e-61	193
TRINITY_DN1552_c1_g1	TRINITY_DN1552_c1_g1_i7	FvH4_2g12350.1	100	0	1295
TRINITY_DN15524_c0_g1	TRINITY_DN15524_c0_g1_i1	FvH4_2g23930.1	100	0	546
TRINITY_DN155378_c0_g2	TRINITY_DN155378_c0_g2_i1	FvH4_6g14410.1	100	7e-122	353
TRINITY_DN15540_c0_g1	TRINITY_DN15540_c0_g1_i2	FvH4_3g22630.1	100	0	890
TRINITY_DN15544_c0_g1	TRINITY_DN15544_c0_g1_i1	FvH4_3g20940.1	100	0	679
TRINITY_DN15546_c0_g1	TRINITY_DN15546_c0_g1_i2	FvH4_2g31630.1	100	0	671
TRINITY_DN15559_c0_g1	TRINITY_DN15559_c0_g1_i4	FvH4_6g19720.1	100	4e-177	503
TRINITY_DN1556_c0_g1	TRINITY_DN1556_c0_g1_i7	FvH4_2g39120.1	100	9e-122	384
TRINITY_DN15562_c0_g1	TRINITY_DN15562_c0_g1_i2	FvH4_1g13110.1	100	3e-41	142
TRINITY_DN15568_c0_g1	TRINITY_DN15568_c0_g1_i1	FvH4_4g23670.1	100	5e-62	203
TRINITY_DN1557_c0_g1	TRINITY_DN1557_c0_g1_i9	FvH4_6g03950.1	100	2e-150	474
TRINITY_DN15572_c0_g2	TRINITY_DN15572_c0_g2_i1	FvH4_6g35800.1	100	9e-66	210
TRINITY_DN155728_c0_g1	TRINITY_DN155728_c0_g1_i2	FvH4_3g28270.1	100	0	951
TRINITY_DN15573_c0_g25	TRINITY_DN15573_c0_g2_i15	FvH4_4g12330.1	100	2e-79	258
TRINITY_DN15574_c0_g1	TRINITY_DN15574_c0_g1_i1	FvH4_7g15480.1	100	1e-113	335
TRINITY_DN15575_c0_g1	TRINITY_DN15575_c0_g1_i3	FvH4_5g19120.1	100	0	684
TRINITY_DN15575_c0_g2	TRINITY_DN15575_c0_g2_i2	FvH4_6g04960.1	100	0	717
TRINITY_DN15599_c0_g1	TRINITY_DN15599_c0_g1_i4	FvH4_4g14400.1	100	9e-87	283
TRINITY_DN15604_c0_g1	TRINITY_DN15604_c0_g1_i1	FvH4_2g22290.1	100	6e-89	267
TRINITY_DN156095_c0_g1	TRINITY_DN156095_c0_g1_i2	FvH4_2g15980.1	100	3e-99	295
TRINITY_DN15611_c0_g1	TRINITY_DN15611_c0_g1_i1	FvH4_3g38760.1	100	2e-179	386
TRINITY_DN15614_c1_g1	TRINITY_DN15614_c1_g1_i1	FvH4_2g23060.1	100	8e-153	439
TRINITY_DN156149_c0_g1	TRINITY_DN156149_c0_g1_i1	FvH4_4g16010.1	100	9e-97	287
TRINITY_DN15618_c0_g1	TRINITY_DN15618_c0_g1_i1	FvH4_7g10300.1	100	2e-25	103
TRINITY_DN1562_c1_g12	TRINITY_DN1562_c1_g1_i12	FvH4_7g18450.1	100	0	1095
TRINITY_DN1562_c1_g2	TRINITY_DN1562_c1_g2_i1	FvH4_7g18510.1	100	0	1164
TRINITY_DN1563_c0_g1	TRINITY_DN1563_c0_g1_i6	FvH4_1g25240.1	100	6e-152	444
TRINITY_DN15631_c0_g1	TRINITY_DN15631_c0_g1_i2	FvH4_7g23530.1	100	0	634
TRINITY_DN15632_c0_g1	TRINITY_DN15632_c0_g1_i2	FvH4_3g21190.1	100	0	527
TRINITY_DN15639_c1_g1	TRINITY_DN15639_c1_g1_i1	FvH4_3g27210.1	100	8e-24	89.7
TRINITY_DN15641_c0_g2	TRINITY_DN15641_c0_g2_i1	FvH4_7g33350.1	100	0	1163
TRINITY_DN15642_c0_g10	TRINITY_DN15642_c0_g1_i10	FvH4_5g19190.1	100	0	687
TRINITY_DN156483_c0_g1	TRINITY_DN156483_c0_g1_i1	FvH4_6g10300.1	100	0	607
TRINITY_DN156491_c0_g2	TRINITY_DN156491_c0_g2_i1	FvH4_7g34100.1	100	1e-83	250
TRINITY_DN15653_c0_g1	TRINITY_DN15653_c0_g1_i1	FvH4_3g39470.1	100	9e-78	244
TRINITY_DN15655_c2_g1	TRINITY_DN15655_c2_g1_i1	FvH4_2g32600.1	100	1e-42	145
TRINITY_DN15657_c0_g3	TRINITY_DN15657_c0_g3_i1	FvH4_7g32510.1	100	0	763
TRINITY_DN15662_c0_g1	TRINITY_DN15662_c0_g1_i2	FvH4_3g37010.1	100	0	775
TRINITY_DN15668_c0_g1	TRINITY_DN15668_c0_g1_i3	FvH4_4g04760.1	100	0	634
TRINITY_DN1567_c0_g1	TRINITY_DN1567_c0_g1_i2	FvH4_2g06450.1	100	0	635
TRINITY_DN1567_c1_g2	TRINITY_DN1567_c1_g2_i1	FvH4_2g06480.1	100	0	638
TRINITY_DN15674_c0_g2	TRINITY_DN15674_c0_g2_i1	FvH4_1g03550.1	100	1e-113	354
TRINITY_DN1568_c0_g2	TRINITY_DN1568_c0_g2_i1	FvH4_7g27680.1	100	1e-22	71.2
TRINITY_DN15681_c0_g1	TRINITY_DN15681_c0_g1_i1	FvH4_7g08070.1	100	2e-108	329
TRINITY_DN15683_c0_g1	TRINITY_DN15683_c0_g1_i2	FvH4_6g29420.1	100	5e-103	304
TRINITY_DN15684_c0_g1	TRINITY_DN15684_c0_g1_i1	FvH4_4g24040.1	100	0	632
TRINITY_DN15685_c0_g2	TRINITY_DN15685_c0_g2_i1	FvH4_7g16950.1	100	6e-39	135
TRINITY_DN15688_c0_g1	TRINITY_DN15688_c0_g1_i4	FvH4_4g06880.1	100	0	758
TRINITY_DN15689_c0_g1	TRINITY_DN15689_c0_g1_i1	FvH4_3g22280.1	100	0	674
TRINITY_DN1569_c0_g1	TRINITY_DN1569_c0_g1_i2	FvH4_4g07390.1	100	0	620
TRINITY_DN1569_c0_g2	TRINITY_DN1569_c0_g2_i1	FvH4_7g00990.1	100	2e-39	140
TRINITY_DN1569_c0_g5	TRINITY_DN1569_c0_g5_i1	FvH4_6g23320.1	100	1e-36	128
TRINITY_DN1570_c0_g1	TRINITY_DN1570_c0_g1_i2	FvH4_4g35390.1	100	0	642
TRINITY_DN1570_c0_g2	TRINITY_DN1570_c0_g2_i5	FvH4_5g16000.1	100	0	644
TRINITY_DN157035_c0_g1	TRINITY_DN157035_c0_g1_i2	FvH4_5g15900.1	100	0	640
TRINITY_DN15704_c0_g1	TRINITY_DN15704_c0_g1_i1	FvH4_2g29380.1	100	4e-37	128
TRINITY_DN1571_c0_g2	TRINITY_DN1571_c0_g2_i2	FvH4_1g23270.1	100	0	517
TRINITY_DN15711_c0_g1	TRINITY_DN15711_c0_g1_i1	FvH4_7g09650.1	100	0	647
TRINITY_DN157310_c0_g1	TRINITY_DN157310_c0_g1_i1	FvH4_6g00090.1	100	3e-120	344
TRINITY_DN1574_c0_g1	TRINITY_DN1574_c0_g1_i4	FvH4_3g20140.1	100	9e-106	321
TRINITY_DN1574_c0_g2	TRINITY_DN1574_c0_g2_i3	FvH4_4g08010.1	100	0	1491
TRINITY_DN15741_c0_g3	TRINITY_DN15741_c0_g3_i3	FvH4_4g10230.1	100	7e-49	164
TRINITY_DN157421_c0_g1	TRINITY_DN157421_c0_g1_i1	FvH4_2g37940.1	100	0	775
TRINITY_DN15745_c0_g1	TRINITY_DN15745_c0_g1_i8	FvH4_1g20280.1	100	0	1190
TRINITY_DN157495_c0_g1	TRINITY_DN157495_c0_g1_i1	FvH4_2g31770.1	100	9e-103	301
TRINITY_DN1576_c0_g3	TRINITY_DN1576_c0_g3_i2	FvH4_6g38440.1	100	3e-48	171
TRINITY_DN1577_c0_g1	TRINITY_DN1577_c0_g1_i1	FvH4_6g07200.1	100	0	1183
TRINITY_DN1578_c0_g1	TRINITY_DN1578_c0_g1_i4	FvH4_1g05960.1	100	1e-142	412
TRINITY_DN15792_c1_g1	TRINITY_DN15792_c1_g1_i1	FvH4_3g45570.1	100	3e-59	190
TRINITY_DN15792_c3_g1	TRINITY_DN15792_c3_g1_i1	FvH4_7g12240.1	100	2e-52	166
TRINITY_DN157956_c0_g1	TRINITY_DN157956_c0_g1_i1	FvH4_6g53270.1	100	2e-103	306
TRINITY_DN15799_c0_g1	TRINITY_DN15799_c0_g1_i3	FvH4_3g09060.1	100	0	1086
TRINITY_DN15805_c0_g1	TRINITY_DN15805_c0_g1_i2	FvH4_2g21970.1	100	8e-133	383
TRINITY_DN15820_c0_g1	TRINITY_DN15820_c0_g1_i1	FvH4_7g20130.1	100	1e-119	352
TRINITY_DN15826_c0_g1	TRINITY_DN15826_c0_g1_i1	FvH4_3g15940.1	100	0	1419
TRINITY_DN15829_c0_g1	TRINITY_DN15829_c0_g1_i1	FvH4_2g24220.1	100	1e-99	294
TRINITY_DN1583_c0_g1	TRINITY_DN1583_c0_g1_i4	FvH4_6g49760.1	100	0	1493
TRINITY_DN15838_c0_g1	TRINITY_DN15838_c0_g1_i7	FvH4_4g10580.1	100	0	855
TRINITY_DN15838_c0_g2	TRINITY_DN15838_c0_g2_i1	FvH4_2g35620.1	100	3e-152	447
TRINITY_DN15838_c0_g3	TRINITY_DN15838_c0_g3_i1	FvH4_7g16810.1	100	1e-105	311
TRINITY_DN15850_c0_g1	TRINITY_DN15850_c0_g1_i2	FvH4_2g21690.1	100	0	687
TRINITY_DN158550_c0_g2	TRINITY_DN158550_c0_g2_i1	FvH4_1g09490.1	100	2e-141	407
TRINITY_DN1587_c0_g1	TRINITY_DN1587_c0_g1_i2	FvH4_4g37100.1	100	0	903
TRINITY_DN15876_c0_g1	TRINITY_DN15876_c0_g1_i2	FvH4_7g02340.1	100	3e-44	162
TRINITY_DN15882_c0_g1	TRINITY_DN15882_c0_g1_i4	FvH4_2g32880.1	100	0	1052
TRINITY_DN15890_c0_g1	TRINITY_DN15890_c0_g1_i2	FvH4_5g16680.1	100	3e-147	422
TRINITY_DN15897_c0_g1	TRINITY_DN15897_c0_g1_i1	FvH4_4g35550.1	100	0	1556
TRINITY_DN1591_c0_g2	TRINITY_DN1591_c0_g2_i4	FvH4_6g28790.1	100	3e-136	427
TRINITY_DN15911_c0_g2	TRINITY_DN15911_c0_g2_i1	FvH4_2g23080.1	100	0	824
TRINITY_DN15914_c0_g1	TRINITY_DN15914_c0_g1_i6	FvH4_6g16890.1	100	0	1654
TRINITY_DN159164_c0_g1	TRINITY_DN159164_c0_g1_i1	FvH4_2g25890.1	100	4e-120	343
TRINITY_DN159165_c0_g1	TRINITY_DN159165_c0_g1_i2	FvH4_2g31780.1	100	1e-120	350
TRINITY_DN15925_c0_g1	TRINITY_DN15925_c0_g1_i6	FvH4_3g03210.1	100	9e-91	292
TRINITY_DN15928_c0_g1	TRINITY_DN15928_c0_g1_i1	FvH4_4g20640.1	100	0	609
TRINITY_DN15932_c0_g1	TRINITY_DN15932_c0_g1_i1	FvH4_2g39820.1	100	3e-12	65.9
TRINITY_DN15939_c0_g1	TRINITY_DN15939_c0_g1_i1	FvH4_3g09890.1	100	0	1259
TRINITY_DN1594_c0_g1	TRINITY_DN1594_c0_g1_i2	FvH4_1g03490.1	100	0	620
TRINITY_DN1594_c0_g2	TRINITY_DN1594_c0_g2_i1	FvH4_7g22850.1	100	0	590
TRINITY_DN15940_c0_g1	TRINITY_DN15940_c0_g1_i2	FvH4_4g22160.1	100	0	1317
TRINITY_DN15945_c0_g2	TRINITY_DN15945_c0_g2_i1	FvH4_6g35910.1	100	6e-47	160
TRINITY_DN15948_c0_g1	TRINITY_DN15948_c0_g1_i1	FvH4_7g24880.1	100	0	553
TRINITY_DN1595_c0_g2	TRINITY_DN1595_c0_g2_i3	FvH4_6g48410.1	100	0	756
TRINITY_DN15953_c0_g1	TRINITY_DN15953_c0_g1_i2	FvH4_7g16890.1	100	2e-102	301
TRINITY_DN15961_c0_g1	TRINITY_DN15961_c0_g1_i6	FvH4_1g22740.1	100	2e-124	397
TRINITY_DN159617_c0_g1	TRINITY_DN159617_c0_g1_i1	FvH4_7g29280.1	100	4e-55	179
TRINITY_DN15966_c0_g1	TRINITY_DN15966_c0_g1_i8	FvH4_7g19950.1	100	2e-80	248
TRINITY_DN1599_c0_g1	TRINITY_DN1599_c0_g1_i1	FvH4_1g21020.1	100	0	928
TRINITY_DN15993_c0_g1	TRINITY_DN15993_c0_g1_i1	FvH4_7g03440.1	100	0	1346
TRINITY_DN160_c1_g1	TRINITY_DN160_c1_g1_i1	FvH4_4g01590.1	100	0	659
TRINITY_DN1600_c0_g1	TRINITY_DN1600_c0_g1_i2	FvH4_7g10790.1	100	3e-21	89
TRINITY_DN16010_c0_g2	TRINITY_DN16010_c0_g2_i1	FvH4_7g19040.1	100	6e-25	73.9
TRINITY_DN160147_c0_g1	TRINITY_DN160147_c0_g1_i2	FvH4_2g06280.1	100	2e-47	155
TRINITY_DN160163_c0_g1	TRINITY_DN160163_c0_g1_i1	FvH4_4g07910.1	100	1e-179	516
TRINITY_DN16020_c0_g2	TRINITY_DN16020_c0_g2_i1	FvH4_3g39840.1	100	0	653
TRINITY_DN16022_c0_g1	TRINITY_DN16022_c0_g1_i1	FvH4_6g02920.1	100	7e-52	179
TRINITY_DN1603_c0_g1	TRINITY_DN1603_c0_g1_i2	FvH4_5g15050.1	100	2e-164	483
TRINITY_DN1603_c1_g1	TRINITY_DN1603_c1_g1_i2	FvH4_6g24120.1	100	5e-50	175
TRINITY_DN16039_c0_g1	TRINITY_DN16039_c0_g1_i1	FvH4_2g34280.1	100	5e-138	398
TRINITY_DN16056_c0_g1	TRINITY_DN16056_c0_g1_i1	FvH4_6g44520.1	100	0	539
TRINITY_DN16058_c0_g1	TRINITY_DN16058_c0_g1_i3	FvH4_2g23390.1	100	4e-120	365
TRINITY_DN1606_c0_g1	TRINITY_DN1606_c0_g1_i8	FvH4_5g11560.1	100	5e-65	221
TRINITY_DN16069_c0_g1	TRINITY_DN16069_c0_g1_i1	FvH4_5g22890.1	100	2e-100	308
TRINITY_DN1607_c0_g1	TRINITY_DN1607_c0_g1_i3	FvH4_1g26120.1	100	0	859
TRINITY_DN16075_c0_g1	TRINITY_DN16075_c0_g1_i1	FvH4_3g09800.1	100	6e-22	87
TRINITY_DN16084_c0_g1	TRINITY_DN16084_c0_g1_i1	FvH4_7g23150.1	100	0	859
TRINITY_DN1609_c0_g1	TRINITY_DN1609_c0_g1_i1	FvH4_2g05750.1	100	2e-99	300
TRINITY_DN1609_c0_g3	TRINITY_DN1609_c0_g3_i1	FvH4_4g14990.1	100	3e-99	294
TRINITY_DN1610_c0_g1	TRINITY_DN1610_c0_g1_i2	FvH4_5g36840.1	100	1e-126	382
TRINITY_DN1610_c0_g2	TRINITY_DN1610_c0_g2_i3	FvH4_5g36830.1	100	2e-131	406
TRINITY_DN161189_c0_g1	TRINITY_DN161189_c0_g1_i1	FvH4_2g41030.1	100	0	516
TRINITY_DN1612_c1_g1	TRINITY_DN1612_c1_g1_i2	FvH4_3g05200.1	100	0	706
TRINITY_DN16121_c0_g1	TRINITY_DN16121_c0_g1_i1	FvH4_2g07760.1	100	1e-111	325
TRINITY_DN161236_c0_g1	TRINITY_DN161236_c0_g1_i2	FvH4_3g25570.1	100	6e-106	310
TRINITY_DN16126_c0_g1	TRINITY_DN16126_c0_g1_i1	FvH4_1g07730.1	100	2e-129	394
TRINITY_DN16127_c0_g1	TRINITY_DN16127_c0_g1_i1	FvH4_1g30090.1	100	1e-87	265
TRINITY_DN1613_c0_g3	TRINITY_DN1613_c0_g3_i3	FvH4_1g02780.1	100	0	969
TRINITY_DN16139_c0_g1	TRINITY_DN16139_c0_g1_i3	FvH4_4g30650.1	100	0	960
TRINITY_DN1614_c0_g1	TRINITY_DN1614_c0_g1_i2	FvH4_7g06360.1	100	0	1206
TRINITY_DN16140_c0_g1	TRINITY_DN16140_c0_g1_i1	FvH4_6g01370.1	100	0	734
TRINITY_DN16149_c0_g1	TRINITY_DN16149_c0_g1_i1	FvH4_2g36620.1	100	0	1506
TRINITY_DN16152_c0_g1	TRINITY_DN16152_c0_g1_i1	FvH4_7g16430.1	100	0	823
TRINITY_DN1616_c0_g1	TRINITY_DN1616_c0_g1_i1	FvH4_6g44950.1	100	0	1339
TRINITY_DN16162_c0_g4	TRINITY_DN16162_c0_g4_i1	FvH4_6g18180.1	100	0	1885
TRINITY_DN1617_c0_g2	TRINITY_DN1617_c0_g2_i2	FvH4_3g43780.1	100	0	1310
TRINITY_DN16174_c0_g1	TRINITY_DN16174_c0_g1_i2	FvH4_2g33770.1	100	0	668
TRINITY_DN16182_c0_g1	TRINITY_DN16182_c0_g1_i1	FvH4_4g11300.1	100	9e-174	493
TRINITY_DN1619_c0_g1	TRINITY_DN1619_c0_g1_i1	FvH4_6g15550.1	100	9e-14	66.2
TRINITY_DN16218_c1_g1	TRINITY_DN16218_c1_g1_i2	FvH4_6g21320.1	100	0	759
TRINITY_DN16219_c0_g1	TRINITY_DN16219_c0_g1_i1	FvH4_2g36220.1	100	0	862
TRINITY_DN16219_c1_g3	TRINITY_DN16219_c1_g3_i1	FvH4_2g13060.1	100	2e-110	333
TRINITY_DN16224_c0_g1	TRINITY_DN16224_c0_g1_i1	FvH4_1g18750.1	100	0	624
TRINITY_DN1623_c1_g1	TRINITY_DN1623_c1_g1_i4	FvH4_6g14760.1	100	0	2187
TRINITY_DN16255_c0_g11	TRINITY_DN16255_c0_g1_i11	FvH4_5g32230.1	100	8e-118	366
TRINITY_DN16265_c0_g1	TRINITY_DN16265_c0_g1_i4	FvH4_6g17450.1	100	8e-166	470
TRINITY_DN1627_c0_g1	TRINITY_DN1627_c0_g1_i1	FvH4_3g32230.1	100	7e-108	330
TRINITY_DN1628_c0_g1	TRINITY_DN1628_c0_g1_i2	FvH4_7g10390.1	100	7e-73	243
TRINITY_DN16280_c0_g1	TRINITY_DN16280_c0_g1_i2	FvH4_c6g00050.1	100	0	1549
TRINITY_DN16292_c0_g1	TRINITY_DN16292_c0_g1_i1	FvH4_6g12740.1	100	2e-125	387
TRINITY_DN163_c1_g1	TRINITY_DN163_c1_g1_i2	FvH4_1g30040.1	100	2e-177	527
TRINITY_DN1632_c0_g2	TRINITY_DN1632_c0_g2_i3	FvH4_2g13000.1	100	1e-24	100
TRINITY_DN1633_c0_g1	TRINITY_DN1633_c0_g1_i2	FvH4_1g18910.1	100	4e-56	163
TRINITY_DN16348_c0_g1	TRINITY_DN16348_c0_g1_i2	FvH4_7g02320.1	100	2e-144	431
TRINITY_DN1635_c0_g1	TRINITY_DN1635_c0_g1_i2	FvH4_4g30260.1	100	0	585
TRINITY_DN16350_c0_g1	TRINITY_DN16350_c0_g1_i1	FvH4_6g00110.1	100	0	663
TRINITY_DN16360_c0_g1	TRINITY_DN16360_c0_g1_i1	FvH4_6g09690.1	100	0	769
TRINITY_DN16365_c0_g1	TRINITY_DN16365_c0_g1_i1	FvH4_6g15210.1	100	0	1875
TRINITY_DN16369_c0_g1	TRINITY_DN16369_c0_g1_i1	FvH4_1g14030.1	100	0	673
TRINITY_DN16371_c0_g1	TRINITY_DN16371_c0_g1_i1	FvH4_7g02550.1	100	4e-174	514
TRINITY_DN16373_c0_g1	TRINITY_DN16373_c0_g1_i3	FvH4_6g37160.1	100	0	788
TRINITY_DN16377_c0_g1	TRINITY_DN16377_c0_g1_i1	FvH4_6g45940.1	100	2e-38	137
TRINITY_DN16382_c0_g1	TRINITY_DN16382_c0_g1_i1	FvH4_5g07290.1	100	0	996
TRINITY_DN163882_c0_g1	TRINITY_DN163882_c0_g1_i1	FvH4_2g18760.1	100	1e-171	490
TRINITY_DN16403_c0_g1	TRINITY_DN16403_c0_g1_i1	FvH4_7g11570.1	100	2e-24	99.8
TRINITY_DN16404_c0_g2	TRINITY_DN16404_c0_g2_i2	FvH4_2g09590.1	100	0	762
TRINITY_DN164171_c0_g1	TRINITY_DN164171_c0_g1_i1	FvH4_6g18350.1	100	0	756
TRINITY_DN1643_c0_g1	TRINITY_DN1643_c0_g1_i5	FvH4_3g07480.1	100	0	795
TRINITY_DN16434_c0_g1	TRINITY_DN16434_c0_g1_i1	FvH4_4g27220.1	100	0	507
TRINITY_DN1644_c0_g1	TRINITY_DN1644_c0_g1_i7	FvH4_5g21420.1	100	0	729
TRINITY_DN16440_c0_g1	TRINITY_DN16440_c0_g1_i1	FvH4_5g15920.1	100	8e-127	375
TRINITY_DN16444_c0_g1	TRINITY_DN16444_c0_g1_i1	FvH4_1g30270.1	100	2e-134	397
TRINITY_DN16447_c0_g12	TRINITY_DN16447_c0_g1_i12	FvH4_6g25740.1	100	1e-27	107
TRINITY_DN1645_c1_g1	TRINITY_DN1645_c1_g1_i1	FvH4_6g33340.1	100	0	932
TRINITY_DN16451_c0_g1	TRINITY_DN16451_c0_g1_i1	FvH4_6g41880.1	100	0	728
TRINITY_DN16455_c0_g1	TRINITY_DN16455_c0_g1_i1	FvH4_2g00980.1	100	3e-33	120
TRINITY_DN1647_c0_g1	TRINITY_DN1647_c0_g1_i9	FvH4_7g31820.1	100	0	739
TRINITY_DN16471_c0_g2	TRINITY_DN16471_c0_g2_i2	FvH4_6g25190.1	100	2e-34	123
TRINITY_DN16471_c0_g4	TRINITY_DN16471_c0_g4_i2	FvH4_1g28620.1	100	0	1278
TRINITY_DN16473_c0_g1	TRINITY_DN16473_c0_g1_i1	FvH4_7g17730.1	100	2e-32	111
TRINITY_DN1648_c0_g1	TRINITY_DN1648_c0_g1_i1	FvH4_7g19290.1	100	2e-175	513
TRINITY_DN16487_c0_g1	TRINITY_DN16487_c0_g1_i1	FvH4_3g26130.1	100	5e-116	344
TRINITY_DN16494_c0_g1	TRINITY_DN16494_c0_g1_i1	FvH4_5g26210.1	100	1e-56	179
TRINITY_DN16498_c0_g1	TRINITY_DN16498_c0_g1_i1	FvH4_1g10140.1	100	7e-108	326
TRINITY_DN1650_c0_g4	TRINITY_DN1650_c0_g4_i1	FvH4_5g08330.1	100	0	649
TRINITY_DN16503_c0_g2	TRINITY_DN16503_c0_g2_i1	FvH4_3g09190.1	100	6e-129	376
TRINITY_DN16507_c0_g1	TRINITY_DN16507_c0_g1_i1	FvH4_3g33240.1	100	0	837
TRINITY_DN16508_c0_g1	TRINITY_DN16508_c0_g1_i1	FvH4_2g16240.1	100	0	561
TRINITY_DN16509_c0_g1	TRINITY_DN16509_c0_g1_i2	FvH4_2g34510.1	100	2e-68	209
TRINITY_DN16510_c0_g1	TRINITY_DN16510_c0_g1_i8	FvH4_6g21530.1	100	0	545
TRINITY_DN16511_c0_g1	TRINITY_DN16511_c0_g1_i5	FvH4_1g02170.1	100	0	1342
TRINITY_DN16513_c0_g1	TRINITY_DN16513_c0_g1_i1	FvH4_7g11990.1	100	1e-116	345
TRINITY_DN16517_c0_g2	TRINITY_DN16517_c0_g2_i1	FvH4_6g47010.1	100	1e-50	161
TRINITY_DN165173_c0_g1	TRINITY_DN165173_c0_g1_i1	FvH4_7g33290.1	100	2e-19	82.8
TRINITY_DN16519_c0_g1	TRINITY_DN16519_c0_g1_i2	FvH4_6g46690.1	100	5e-66	210
TRINITY_DN1652_c0_g1	TRINITY_DN1652_c0_g1_i1	FvH4_1g10260.1	100	2e-159	472
TRINITY_DN1652_c0_g4	TRINITY_DN1652_c0_g4_i1	FvH4_5g27230.1	100	0	976
TRINITY_DN16523_c0_g1	TRINITY_DN16523_c0_g1_i1	FvH4_6g05000.1	100	0	1162
TRINITY_DN16528_c0_g1	TRINITY_DN16528_c0_g1_i1	FvH4_3g16940.1	100	2e-86	261
TRINITY_DN1653_c1_g3	TRINITY_DN1653_c1_g3_i1	FvH4_5g34130.1	100	0	1412
TRINITY_DN1653_c2_g1	TRINITY_DN1653_c2_g1_i1	FvH4_2g05720.1	100	0	1118
TRINITY_DN1654_c0_g1	TRINITY_DN1654_c0_g1_i3	FvH4_4g12100.1	100	0	1731
TRINITY_DN1654_c1_g1	TRINITY_DN1654_c1_g1_i1	FvH4_6g16860.1	100	0	1481
TRINITY_DN16576_c0_g1	TRINITY_DN16576_c0_g1_i1	FvH4_2g16250.1	100	2e-54	180
TRINITY_DN1659_c0_g1	TRINITY_DN1659_c0_g1_i5	FvH4_2g11080.1	100	1e-50	177
TRINITY_DN166_c0_g1	TRINITY_DN166_c0_g1_i2	FvH4_4g22780.1	100	0	712
TRINITY_DN166_c0_g2	TRINITY_DN166_c0_g2_i1	FvH4_1g23480.1	100	1e-134	390
TRINITY_DN166_c6_g1	TRINITY_DN166_c6_g1_i1	FvH4_2g25870.1	100	3e-98	300
TRINITY_DN16605_c0_g1	TRINITY_DN16605_c0_g1_i1	FvH4_7g03520.1	100	1e-74	234
TRINITY_DN16612_c0_g1	TRINITY_DN16612_c0_g1_i1	FvH4_2g35530.1	100	1e-152	434
TRINITY_DN16625_c0_g1	TRINITY_DN16625_c0_g1_i1	FvH4_5g09300.1	100	0	893
TRINITY_DN1663_c0_g1	TRINITY_DN1663_c0_g1_i3	FvH4_2g39840.1	100	0	585
TRINITY_DN166302_c0_g1	TRINITY_DN166302_c0_g1_i1	FvH4_4g33220.1	100	0	737
TRINITY_DN16634_c0_g1	TRINITY_DN16634_c0_g1_i1	FvH4_1g13890.1	100	0	542
TRINITY_DN1664_c0_g2	TRINITY_DN1664_c0_g2_i1	FvH4_6g49020.1	100	6e-163	463
TRINITY_DN1665_c0_g3	TRINITY_DN1665_c0_g3_i3	FvH4_4g22340.1	100	9e-52	176
TRINITY_DN166625_c0_g2	TRINITY_DN166625_c0_g2_i1	FvH4_3g23120.1	100	0	547
TRINITY_DN16666_c0_g1	TRINITY_DN16666_c0_g1_i1	FvH4_1g06510.1	100	0	682
TRINITY_DN1667_c0_g1	TRINITY_DN1667_c0_g1_i1	FvH4_3g28990.1	100	0	727
TRINITY_DN16684_c0_g3	TRINITY_DN16684_c0_g3_i7	FvH4_5g27290.1	100	3e-67	227
TRINITY_DN16688_c0_g1	TRINITY_DN16688_c0_g1_i2	FvH4_4g18560.1	100	8e-40	134
TRINITY_DN1669_c0_g2	TRINITY_DN1669_c0_g2_i1	FvH4_3g02890.1	100	8e-172	491
TRINITY_DN16697_c1_g1	TRINITY_DN16697_c1_g1_i1	FvH4_4g15980.1	100	7e-111	325
TRINITY_DN16701_c0_g1	TRINITY_DN16701_c0_g1_i1	FvH4_3g08460.1	100	0	1040
TRINITY_DN16705_c0_g2	TRINITY_DN16705_c0_g2_i1	FvH4_5g11650.1	100	5e-174	506
TRINITY_DN1671_c0_g1	TRINITY_DN1671_c0_g1_i2	FvH4_2g40050.1	100	2e-14	69.7
TRINITY_DN167157_c0_g1	TRINITY_DN167157_c0_g1_i1	FvH4_2g33190.1	100	2e-101	303
TRINITY_DN16717_c0_g2	TRINITY_DN16717_c0_g2_i4	FvH4_3g26690.1	100	8e-107	338
TRINITY_DN1673_c0_g3	TRINITY_DN1673_c0_g3_i1	FvH4_2g23040.1	100	2e-74	227
TRINITY_DN1673_c3_g1	TRINITY_DN1673_c3_g1_i1	FvH4_3g39410.1	100	2e-85	276
TRINITY_DN1673_c4_g1	TRINITY_DN1673_c4_g1_i1	FvH4_3g19800.1	100	2e-107	339
TRINITY_DN16734_c0_g1	TRINITY_DN16734_c0_g1_i1	FvH4_1g07240.1	100	2e-33	129
TRINITY_DN16739_c0_g1	TRINITY_DN16739_c0_g1_i1	FvH4_3g32640.1	100	5e-41	151
TRINITY_DN1674_c0_g1	TRINITY_DN1674_c0_g1_i3	FvH4_4g02510.1	100	2e-123	358
TRINITY_DN16741_c0_g1	TRINITY_DN16741_c0_g1_i4	FvH4_2g00490.1	100	4e-167	489
TRINITY_DN1675_c0_g2	TRINITY_DN1675_c0_g2_i1	FvH4_3g18320.1	100	0	1180
TRINITY_DN16765_c1_g1	TRINITY_DN16765_c1_g1_i1	FvH4_1g03570.1	100	2e-30	116
TRINITY_DN168_c0_g1	TRINITY_DN168_c0_g1_i3	FvH4_6g31430.1	100	3e-163	502
TRINITY_DN16801_c0_g1	TRINITY_DN16801_c0_g1_i2	FvH4_6g51320.1	100	0	771
TRINITY_DN168011_c0_g1	TRINITY_DN168011_c0_g1_i1	FvH4_4g14940.1	100	0	592
TRINITY_DN168022_c0_g1	TRINITY_DN168022_c0_g1_i1	FvH4_5g22150.1	100	9e-18	82.8
TRINITY_DN168039_c0_g1	TRINITY_DN168039_c0_g1_i1	FvH4_6g13070.1	100	1e-48	165
TRINITY_DN16815_c0_g1	TRINITY_DN16815_c0_g1_i1	FvH4_5g28820.1	100	1e-72	222
TRINITY_DN168178_c0_g1	TRINITY_DN168178_c0_g1_i1	FvH4_4g18260.1	100	2e-102	300
TRINITY_DN168183_c0_g1	TRINITY_DN168183_c0_g1_i1	FvH4_1g29880.1	100	5e-117	337
TRINITY_DN16821_c0_g2	TRINITY_DN16821_c0_g2_i2	FvH4_5g23420.1	100	0	1908
TRINITY_DN16821_c0_g4	TRINITY_DN16821_c0_g4_i2	FvH4_5g22710.1	100	0	1862
TRINITY_DN168257_c0_g1	TRINITY_DN168257_c0_g1_i1	FvH4_2g16360.1	100	0	778
TRINITY_DN16829_c0_g1	TRINITY_DN16829_c0_g1_i7	FvH4_3g28330.1	100	0	707
TRINITY_DN1684_c0_g4	TRINITY_DN1684_c0_g4_i1	FvH4_3g38420.1	100	0	1531
TRINITY_DN16842_c0_g3	TRINITY_DN16842_c0_g3_i2	FvH4_6g43140.1	100	0	741
TRINITY_DN168499_c0_g1	TRINITY_DN168499_c0_g1_i1	FvH4_3g36840.1	100	0	536
TRINITY_DN168500_c0_g1	TRINITY_DN168500_c0_g1_i1	FvH4_1g15760.1	100	2e-37	130
TRINITY_DN168559_c0_g1	TRINITY_DN168559_c0_g1_i1	FvH4_6g08340.1	100	6e-34	121
TRINITY_DN168637_c0_g1	TRINITY_DN168637_c0_g1_i1	FvH4_1g24550.1	100	3e-101	291
TRINITY_DN16865_c0_g1	TRINITY_DN16865_c0_g1_i1	FvH4_2g28140.1	100	8e-67	207
TRINITY_DN16865_c0_g2	TRINITY_DN16865_c0_g2_i4	FvH4_5g20660.1	100	1e-19	87
TRINITY_DN16867_c0_g1	TRINITY_DN16867_c0_g1_i1	FvH4_4g35930.1	100	0	1008
TRINITY_DN168677_c0_g1	TRINITY_DN168677_c0_g1_i1	FvH4_6g12780.1	100	0	1040
TRINITY_DN16868_c0_g1	TRINITY_DN16868_c0_g1_i1	FvH4_6g30780.1	100	0	745
TRINITY_DN16869_c0_g1	TRINITY_DN16869_c0_g1_i2	FvH4_4g34710.1	100	0	607
TRINITY_DN168716_c0_g1	TRINITY_DN168716_c0_g1_i1	FvH4_4g12830.1	100	0	967
TRINITY_DN168799_c0_g1	TRINITY_DN168799_c0_g1_i1	FvH4_5g10800.1	100	0	767
TRINITY_DN168800_c0_g1	TRINITY_DN168800_c0_g1_i1	FvH4_2g34960.1	100	2e-157	447
TRINITY_DN16881_c0_g1	TRINITY_DN16881_c0_g1_i1	FvH4_c22g00010.1	100	5e-49	162
TRINITY_DN168915_c0_g1	TRINITY_DN168915_c0_g1_i1	FvH4_6g42650.1	100	0	619
TRINITY_DN169_c1_g1	TRINITY_DN169_c1_g1_i2	FvH4_2g36730.1	100	2e-114	350
TRINITY_DN1690_c0_g1	TRINITY_DN1690_c0_g1_i3	FvH4_7g18230.1	100	1e-51	166
TRINITY_DN1690_c1_g1	TRINITY_DN1690_c1_g1_i5	FvH4_1g14350.1	100	0	3026
TRINITY_DN169026_c0_g1	TRINITY_DN169026_c0_g1_i1	FvH4_6g40150.1	100	0	529
TRINITY_DN16906_c0_g1	TRINITY_DN16906_c0_g1_i1	FvH4_2g33130.1	100	0	632
TRINITY_DN16916_c0_g1	TRINITY_DN16916_c0_g1_i1	FvH4_7g25580.1	100	3e-126	372
TRINITY_DN16921_c0_g1	TRINITY_DN16921_c0_g1_i1	FvH4_5g00760.1	100	0	887
TRINITY_DN169233_c0_g1	TRINITY_DN169233_c0_g1_i1	FvH4_3g23070.1	100	0	852
TRINITY_DN169239_c0_g1	TRINITY_DN169239_c0_g1_i1	FvH4_6g04130.1	100	4e-90	271
TRINITY_DN16924_c0_g1	TRINITY_DN16924_c0_g1_i2	FvH4_7g12100.1	100	2e-104	307
TRINITY_DN1693_c0_g1	TRINITY_DN1693_c0_g1_i2	FvH4_7g14480.1	100	0	1111
TRINITY_DN16931_c0_g1	TRINITY_DN16931_c0_g1_i1	FvH4_6g30860.1	100	1e-112	331
TRINITY_DN16935_c0_g1	TRINITY_DN16935_c0_g1_i2	FvH4_4g03500.1	100	6e-15	73.2
TRINITY_DN169358_c0_g1	TRINITY_DN169358_c0_g1_i1	FvH4_7g04920.1	100	0	1129
TRINITY_DN16937_c0_g1	TRINITY_DN16937_c0_g1_i1	FvH4_4g33390.1	100	0	1287
TRINITY_DN169398_c0_g1	TRINITY_DN169398_c0_g1_i1	FvH4_1g25390.1	100	0	888
TRINITY_DN1695_c0_g1	TRINITY_DN1695_c0_g1_i2	FvH4_7g26210.1	100	0	1193
TRINITY_DN16956_c0_g1	TRINITY_DN16956_c0_g1_i2	FvH4_6g26810.1	100	0	556
TRINITY_DN16963_c0_g1	TRINITY_DN16963_c0_g1_i1	FvH4_7g33050.1	100	1e-55	185
TRINITY_DN1697_c1_g1	TRINITY_DN1697_c1_g1_i2	FvH4_3g39450.1	100	4e-62	211
TRINITY_DN1697_c1_g3	TRINITY_DN1697_c1_g3_i2	FvH4_6g14620.1	100	0	1790
TRINITY_DN16970_c0_g2	TRINITY_DN16970_c0_g2_i4	FvH4_2g17240.1	100	0	948
TRINITY_DN16970_c1_g1	TRINITY_DN16970_c1_g1_i1	FvH4_6g46800.1	100	0	716
TRINITY_DN16971_c0_g1	TRINITY_DN16971_c0_g1_i1	FvH4_5g17470.1	100	8e-128	365
TRINITY_DN16972_c0_g1	TRINITY_DN16972_c0_g1_i1	FvH4_4g22660.1	100	3e-109	356
TRINITY_DN169727_c0_g1	TRINITY_DN169727_c0_g1_i1	FvH4_3g24880.1	100	0	869
TRINITY_DN16977_c0_g2	TRINITY_DN16977_c0_g2_i1	FvH4_6g50270.1	100	2e-105	310
TRINITY_DN16989_c0_g1	TRINITY_DN16989_c0_g1_i2	FvH4_5g21890.1	100	0	866
TRINITY_DN169893_c0_g1	TRINITY_DN169893_c0_g1_i1	FvH4_5g31410.1	100	0	1379
TRINITY_DN1699_c0_g2	TRINITY_DN1699_c0_g2_i8	FvH4_5g13340.1	100	0	1260
TRINITY_DN1699_c2_g1	TRINITY_DN1699_c2_g1_i1	FvH4_2g21310.1	100	4e-89	290
TRINITY_DN1699_c3_g1	TRINITY_DN1699_c3_g1_i3	FvH4_4g07090.1	100	1e-135	405
TRINITY_DN17_c0_g1	TRINITY_DN17_c0_g1_i4	FvH4_2g33870.1	100	0	1557
TRINITY_DN170_c0_g2	TRINITY_DN170_c0_g2_i6	FvH4_3g24980.1	100	0	1533
TRINITY_DN1700_c0_g1	TRINITY_DN1700_c0_g1_i4	FvH4_6g52920.1	100	0	878
TRINITY_DN17012_c0_g2	TRINITY_DN17012_c0_g2_i1	FvH4_4g10790.1	100	5e-152	439
TRINITY_DN17016_c0_g1	TRINITY_DN17016_c0_g1_i4	FvH4_3g00120.1	100	0	1038
TRINITY_DN170198_c0_g1	TRINITY_DN170198_c0_g1_i1	FvH4_1g20110.1	100	0	644
TRINITY_DN17030_c0_g1	TRINITY_DN17030_c0_g1_i1	FvH4_6g33260.1	100	0	1492
TRINITY_DN170542_c0_g1	TRINITY_DN170542_c0_g1_i1	FvH4_2g26490.1	100	0	1550
TRINITY_DN170558_c0_g1	TRINITY_DN170558_c0_g1_i1	FvH4_7g08000.1	100	0	849
TRINITY_DN170586_c0_g1	TRINITY_DN170586_c0_g1_i1	FvH4_7g05260.1	100	1e-85	254
TRINITY_DN17059_c0_g1	TRINITY_DN17059_c0_g1_i1	FvH4_7g23510.1	100	0	1326
TRINITY_DN17066_c0_g1	TRINITY_DN17066_c0_g1_i1	FvH4_3g24410.1	100	0	958
TRINITY_DN17066_c0_g3	TRINITY_DN17066_c0_g3_i2	FvH4_2g17270.1	100	0	612
TRINITY_DN17078_c0_g1	TRINITY_DN17078_c0_g1_i1	FvH4_6g21790.1	100	2e-49	170
TRINITY_DN1708_c1_g1	TRINITY_DN1708_c1_g1_i2	FvH4_3g18000.1	100	3e-124	388
TRINITY_DN1708_c2_g1	TRINITY_DN1708_c2_g1_i1	FvH4_2g40830.1	100	7e-61	208
TRINITY_DN170825_c0_g1	TRINITY_DN170825_c0_g1_i1	FvH4_1g28880.1	100	2e-122	353
TRINITY_DN170848_c0_g1	TRINITY_DN170848_c0_g1_i1	FvH4_7g11390.1	100	2e-145	411
TRINITY_DN17086_c0_g1	TRINITY_DN17086_c0_g1_i2	FvH4_2g10940.1	100	2e-72	234
TRINITY_DN17091_c0_g1	TRINITY_DN17091_c0_g1_i2	FvH4_6g15690.1	100	0	578
TRINITY_DN170929_c0_g1	TRINITY_DN170929_c0_g1_i1	FvH4_5g00420.1	100	2e-129	375
TRINITY_DN17096_c0_g1	TRINITY_DN17096_c0_g1_i1	FvH4_2g18090.1	100	7e-168	485
TRINITY_DN17097_c0_g1	TRINITY_DN17097_c0_g1_i3	FvH4_3g21600.1	100	4e-83	219
TRINITY_DN17106_c0_g2	TRINITY_DN17106_c0_g2_i1	FvH4_6g10350.1	100	2e-139	402
TRINITY_DN1712_c0_g2	TRINITY_DN1712_c0_g2_i1	FvH4_2g36630.1	100	3e-64	214
TRINITY_DN17123_c0_g1	TRINITY_DN17123_c0_g1_i1	FvH4_1g27110.1	100	3e-12	60.1
TRINITY_DN17124_c0_g1	TRINITY_DN17124_c0_g1_i2	FvH4_1g01630.1	100	2e-55	185
TRINITY_DN171315_c0_g1	TRINITY_DN171315_c0_g1_i1	FvH4_1g29290.1	100	0	805
TRINITY_DN17132_c0_g1	TRINITY_DN17132_c0_g1_i7	FvH4_3g27700.1	100	0	615
TRINITY_DN171398_c0_g1	TRINITY_DN171398_c0_g1_i1	FvH4_5g20940.1	100	3e-104	305
TRINITY_DN1715_c0_g1	TRINITY_DN1715_c0_g1_i1	FvH4_2g35860.1	100	1e-121	364
TRINITY_DN1715_c1_g1	TRINITY_DN1715_c1_g1_i4	FvH4_3g24560.1	100	0	776
TRINITY_DN1715_c2_g1	TRINITY_DN1715_c2_g1_i1	FvH4_2g34560.1	100	3e-167	483
TRINITY_DN171500_c0_g1	TRINITY_DN171500_c0_g1_i1	FvH4_6g19450.1	100	0	693
TRINITY_DN17169_c0_g1	TRINITY_DN17169_c0_g1_i2	FvH4_6g31380.1	100	4e-62	199
TRINITY_DN17172_c0_g1	TRINITY_DN17172_c0_g1_i2	FvH4_3g13980.1	100	0	726
TRINITY_DN171768_c0_g1	TRINITY_DN171768_c0_g1_i1	FvH4_3g17050.1	100	2e-170	484
TRINITY_DN171786_c0_g1	TRINITY_DN171786_c0_g1_i1	FvH4_5g23280.1	100	0	926
TRINITY_DN171811_c0_g1	TRINITY_DN171811_c0_g1_i1	FvH4_1g18020.1	100	7e-101	300
TRINITY_DN17182_c0_g1	TRINITY_DN17182_c0_g1_i2	FvH4_5g12540.1	100	3e-54	182
TRINITY_DN17191_c0_g1	TRINITY_DN17191_c0_g1_i1	FvH4_4g07770.1	100	1e-41	154
TRINITY_DN1720_c0_g1	TRINITY_DN1720_c0_g1_i2	FvH4_5g21710.1	100	0	1085
TRINITY_DN1721_c0_g1	TRINITY_DN1721_c0_g1_i4	FvH4_3g11950.1	100	0	764
TRINITY_DN17214_c0_g2	TRINITY_DN17214_c0_g2_i4	FvH4_1g29990.1	100	0	1006
TRINITY_DN172144_c0_g1	TRINITY_DN172144_c0_g1_i1	FvH4_6g43900.1	100	5e-90	269
TRINITY_DN1722_c1_g1	TRINITY_DN1722_c1_g1_i1	FvH4_6g21880.1	100	8e-121	371
TRINITY_DN1722_c1_g2	TRINITY_DN1722_c1_g2_i4	FvH4_7g07240.1	100	0	614
TRINITY_DN1722_c1_g3	TRINITY_DN1722_c1_g3_i1	FvH4_6g20360.1	100	0	904
TRINITY_DN1723_c1_g1	TRINITY_DN1723_c1_g1_i5	FvH4_2g38610.1	100	3e-66	214
TRINITY_DN1723_c2_g3	TRINITY_DN1723_c2_g3_i1	FvH4_6g06000.1	100	0	1326
TRINITY_DN17233_c0_g1	TRINITY_DN17233_c0_g1_i2	FvH4_2g31340.1	100	0	900
TRINITY_DN172406_c0_g1	TRINITY_DN172406_c0_g1_i1	FvH4_5g06770.1	100	0	702
TRINITY_DN1726_c0_g1	TRINITY_DN1726_c0_g1_i1	FvH4_1g18010.1	100	0	796
TRINITY_DN172633_c0_g1	TRINITY_DN172633_c0_g1_i1	FvH4_1g17980.1	100	2e-84	258
TRINITY_DN17268_c0_g1	TRINITY_DN17268_c0_g1_i2	FvH4_4g28780.1	100	2e-131	378
TRINITY_DN17269_c0_g1	TRINITY_DN17269_c0_g1_i2	FvH4_6g21140.1	100	0	818
TRINITY_DN1727_c0_g12	TRINITY_DN1727_c0_g1_i12	FvH4_7g07940.1	100	0	954
TRINITY_DN1727_c0_g2	TRINITY_DN1727_c0_g2_i1	FvH4_6g07890.1	100	0	853
TRINITY_DN1727_c1_g1	TRINITY_DN1727_c1_g1_i3	FvH4_1g07520.1	100	2e-157	466
TRINITY_DN172704_c1_g1	TRINITY_DN172704_c1_g1_i1	FvH4_4g34890.1	100	3e-109	317
TRINITY_DN17271_c0_g1	TRINITY_DN17271_c0_g1_i1	FvH4_6g19960.1	100	1e-88	266
TRINITY_DN17275_c0_g1	TRINITY_DN17275_c0_g1_i1	FvH4_7g16960.1	100	0	1132
TRINITY_DN172771_c0_g1	TRINITY_DN172771_c0_g1_i1	FvH4_5g06310.1	100	3e-94	279
TRINITY_DN1728_c2_g2	TRINITY_DN1728_c2_g2_i2	FvH4_6g11560.1	100	5e-95	282
TRINITY_DN1728_c2_g4	TRINITY_DN1728_c2_g4_i1	FvH4_6g10180.1	100	2e-85	259
TRINITY_DN172814_c0_g1	TRINITY_DN172814_c0_g1_i1	FvH4_6g33490.1	100	1e-43	145
TRINITY_DN17285_c0_g1	TRINITY_DN17285_c0_g1_i2	FvH4_2g18840.1	100	0	662
TRINITY_DN172888_c0_g1	TRINITY_DN172888_c0_g1_i1	FvH4_4g32970.1	100	0	772
TRINITY_DN173_c3_g1	TRINITY_DN173_c3_g1_i1	FvH4_5g38980.1	100	4e-43	141
TRINITY_DN1730_c0_g1	TRINITY_DN1730_c0_g1_i3	FvH4_7g02540.1	100	4e-38	139
TRINITY_DN1731_c1_g1	TRINITY_DN1731_c1_g1_i6	FvH4_6g01740.1	100	0	756
TRINITY_DN173108_c0_g1	TRINITY_DN173108_c0_g1_i1	FvH4_2g11630.1	100	1e-60	198
TRINITY_DN17314_c0_g1	TRINITY_DN17314_c0_g1_i3	FvH4_6g41250.1	100	0	1352
TRINITY_DN17318_c0_g1	TRINITY_DN17318_c0_g1_i1	FvH4_5g13870.1	100	0	718
TRINITY_DN17323_c0_g1	TRINITY_DN17323_c0_g1_i4	FvH4_5g15510.1	100	0	969
TRINITY_DN17326_c0_g1	TRINITY_DN17326_c0_g1_i2	FvH4_3g30980.1	100	0	1088
TRINITY_DN17328_c0_g1	TRINITY_DN17328_c0_g1_i2	FvH4_2g20240.1	100	0	777
TRINITY_DN17329_c0_g1	TRINITY_DN17329_c0_g1_i1	FvH4_2g37930.1	100	0	594
TRINITY_DN1733_c0_g1	TRINITY_DN1733_c0_g1_i5	FvH4_2g01290.1	100	0	3019
TRINITY_DN17330_c0_g1	TRINITY_DN17330_c0_g1_i1	FvH4_5g38330.1	100	0	717
TRINITY_DN17337_c0_g1	TRINITY_DN17337_c0_g1_i1	FvH4_7g26180.1	100	0	580
TRINITY_DN17343_c0_g1	TRINITY_DN17343_c0_g1_i1	FvH4_5g36590.1	100	2e-97	291
TRINITY_DN173450_c0_g1	TRINITY_DN173450_c0_g1_i1	FvH4_2g19520.1	100	4e-140	402
TRINITY_DN1735_c0_g1	TRINITY_DN1735_c0_g1_i2	FvH4_4g26870.1	100	2e-152	464
TRINITY_DN17351_c0_g2	TRINITY_DN17351_c0_g2_i1	FvH4_5g22980.1	100	0	1664
TRINITY_DN173536_c0_g1	TRINITY_DN173536_c0_g1_i1	FvH4_3g42280.1	100	3e-18	73.6
TRINITY_DN173679_c0_g1	TRINITY_DN173679_c0_g1_i1	FvH4_3g23270.1	100	6e-128	368
TRINITY_DN1739_c0_g1	TRINITY_DN1739_c0_g1_i2	FvH4_1g08390.1	100	0	525
TRINITY_DN17395_c0_g1	TRINITY_DN17395_c0_g1_i1	FvH4_2g28040.1	100	0	796
TRINITY_DN17398_c0_g3	TRINITY_DN17398_c0_g3_i1	FvH4_3g30910.1	100	1e-117	338
TRINITY_DN174016_c0_g1	TRINITY_DN174016_c0_g1_i1	FvH4_4g28270.1	100	3e-164	475
TRINITY_DN17406_c0_g1	TRINITY_DN17406_c0_g1_i1	FvH4_7g08940.1	100	4e-165	468
TRINITY_DN17413_c0_g1	TRINITY_DN17413_c0_g1_i1	FvH4_6g31220.1	100	4e-160	449
TRINITY_DN1743_c1_g1	TRINITY_DN1743_c1_g1_i1	FvH4_7g16400.1	100	5e-25	91.7
TRINITY_DN17439_c0_g1	TRINITY_DN17439_c0_g1_i5	FvH4_6g52480.1	100	0	1080
TRINITY_DN17449_c0_g1	TRINITY_DN17449_c0_g1_i7	FvH4_7g34290.1	100	0	932
TRINITY_DN1745_c0_g1	TRINITY_DN1745_c0_g1_i1	FvH4_7g08300.1	100	7e-65	206
TRINITY_DN1746_c0_g2	TRINITY_DN1746_c0_g2_i2	FvH4_3g30400.1	100	2e-25	99.4
TRINITY_DN1746_c0_g3	TRINITY_DN1746_c0_g3_i1	FvH4_4g34740.1	100	0	656
TRINITY_DN174603_c0_g1	TRINITY_DN174603_c0_g1_i1	FvH4_3g15820.1	100	2e-60	193
TRINITY_DN17467_c0_g1	TRINITY_DN17467_c0_g1_i4	FvH4_3g37430.1	100	3e-51	170
TRINITY_DN17471_c0_g2	TRINITY_DN17471_c0_g2_i1	FvH4_4g12280.1	100	2e-54	187
TRINITY_DN1748_c0_g1	TRINITY_DN1748_c0_g1_i4	FvH4_4g11760.1	100	1e-137	426
TRINITY_DN1748_c0_g2	TRINITY_DN1748_c0_g2_i1	FvH4_3g17670.1	100	4e-26	100
TRINITY_DN1748_c2_g1	TRINITY_DN1748_c2_g1_i1	FvH4_5g00100.1	100	2e-57	189
TRINITY_DN174895_c0_g1	TRINITY_DN174895_c0_g1_i1	FvH4_5g04330.1	100	9e-109	311
TRINITY_DN174968_c0_g1	TRINITY_DN174968_c0_g1_i1	FvH4_2g38050.1	100	0	723
TRINITY_DN175_c0_g2	TRINITY_DN175_c0_g2_i1	FvH4_3g17810.1	100	0	754
TRINITY_DN1751_c0_g3	TRINITY_DN1751_c0_g3_i1	FvH4_7g00480.1	100	3e-169	501
TRINITY_DN1752_c0_g1	TRINITY_DN1752_c0_g1_i3	FvH4_5g06420.1	100	0	695
TRINITY_DN1753_c0_g1	TRINITY_DN1753_c0_g1_i8	FvH4_2g10600.1	100	1e-143	425
TRINITY_DN175339_c0_g1	TRINITY_DN175339_c0_g1_i1	FvH4_2g38570.1	100	0	908
TRINITY_DN1754_c0_g1	TRINITY_DN1754_c0_g1_i9	FvH4_5g21670.1	100	0	696
TRINITY_DN17544_c1_g1	TRINITY_DN17544_c1_g1_i8	FvH4_4g24520.1	100	2e-54	174
TRINITY_DN17545_c0_g1	TRINITY_DN17545_c0_g1_i1	FvH4_6g22060.1	100	0	791
TRINITY_DN17545_c2_g1	TRINITY_DN17545_c2_g1_i1	FvH4_4g26680.1	100	9e-29	109
TRINITY_DN17552_c0_g2	TRINITY_DN17552_c0_g2_i1	FvH4_2g12460.1	100	9e-80	241
TRINITY_DN175760_c0_g1	TRINITY_DN175760_c0_g1_i1	FvH4_3g12920.1	100	1e-137	401
TRINITY_DN175845_c0_g1	TRINITY_DN175845_c0_g1_i1	FvH4_2g08980.1	100	1e-67	208
TRINITY_DN17589_c0_g1	TRINITY_DN17589_c0_g1_i1	FvH4_1g09140.1	100	0	1100
TRINITY_DN1759_c0_g2	TRINITY_DN1759_c0_g2_i4	FvH4_5g05740.1	100	7e-169	456
TRINITY_DN1759_c0_g5	TRINITY_DN1759_c0_g5_i2	FvH4_4g25820.1	100	0	659
TRINITY_DN1759_c1_g1	TRINITY_DN1759_c1_g1_i3	FvH4_6g26310.1	100	0	933
TRINITY_DN1759_c2_g1	TRINITY_DN1759_c2_g1_i1	FvH4_6g37090.1	100	0	988
TRINITY_DN1759_c2_g2	TRINITY_DN1759_c2_g2_i3	FvH4_7g02700.1	100	0	1427
TRINITY_DN1759_c3_g1	TRINITY_DN1759_c3_g1_i1	FvH4_6g25520.1	100	5e-32	118
TRINITY_DN17592_c0_g1	TRINITY_DN17592_c0_g1_i1	FvH4_6g06320.1	100	2e-126	385
TRINITY_DN175938_c0_g1	TRINITY_DN175938_c0_g1_i1	FvH4_5g08680.1	100	4e-140	404
TRINITY_DN17597_c0_g1	TRINITY_DN17597_c0_g1_i2	FvH4_2g41380.1	100	0	590
TRINITY_DN176_c0_g3	TRINITY_DN176_c0_g3_i2	FvH4_2g09990.1	100	0	1454
TRINITY_DN17600_c0_g1	TRINITY_DN17600_c0_g1_i3	FvH4_6g53890.1	100	0	912
TRINITY_DN176034_c0_g1	TRINITY_DN176034_c0_g1_i1	FvH4_7g10550.1	100	1e-54	179
TRINITY_DN17606_c0_g2	TRINITY_DN17606_c0_g2_i1	FvH4_5g21560.1	100	4e-77	230
TRINITY_DN17607_c0_g1	TRINITY_DN17607_c0_g1_i1	FvH4_4g19530.1	100	2e-98	289
TRINITY_DN1762_c0_g1	TRINITY_DN1762_c0_g1_i6	FvH4_4g27130.1	100	4e-152	464
TRINITY_DN176244_c0_g1	TRINITY_DN176244_c0_g1_i1	FvH4_1g26060.1	100	2e-124	361
TRINITY_DN17627_c0_g1	TRINITY_DN17627_c0_g1_i2	FvH4_5g05870.1	100	0	885
TRINITY_DN176275_c0_g1	TRINITY_DN176275_c0_g1_i1	FvH4_1g11700.1	100	5e-167	478
TRINITY_DN1763_c0_g2	TRINITY_DN1763_c0_g2_i1	FvH4_1g19680.1	100	0	1057
TRINITY_DN176426_c0_g1	TRINITY_DN176426_c0_g1_i1	FvH4_3g08850.1	100	1e-63	196
TRINITY_DN176443_c0_g1	TRINITY_DN176443_c0_g1_i1	FvH4_3g36300.1	100	1e-53	176
TRINITY_DN17656_c0_g1	TRINITY_DN17656_c0_g1_i1	FvH4_5g01020.1	100	8e-91	267
TRINITY_DN1766_c0_g1	TRINITY_DN1766_c0_g1_i1	FvH4_6g26850.1	100	0	649
TRINITY_DN1767_c9_g1	TRINITY_DN1767_c9_g1_i1	FvH4_3g23620.1	100	0	639
TRINITY_DN17680_c0_g1	TRINITY_DN17680_c0_g1_i5	FvH4_3g10400.1	100	1e-15	68.9
TRINITY_DN17684_c0_g1	TRINITY_DN17684_c0_g1_i1	FvH4_5g19040.1	100	0	699
TRINITY_DN1769_c0_g1	TRINITY_DN1769_c0_g1_i1	FvH4_2g05690.1	100	0	986
TRINITY_DN1769_c0_g3	TRINITY_DN1769_c0_g3_i1	FvH4_2g05600.1	100	0	971
TRINITY_DN1769_c1_g1	TRINITY_DN1769_c1_g1_i1	FvH4_7g06760.1	100	3e-14	68.6
TRINITY_DN1769_c2_g2	TRINITY_DN1769_c2_g2_i1	FvH4_7g15170.1	100	0	580
TRINITY_DN17691_c0_g1	TRINITY_DN17691_c0_g1_i1	FvH4_5g08510.1	100	6e-42	147
TRINITY_DN1770_c0_g1	TRINITY_DN1770_c0_g1_i9	FvH4_1g14540.1	100	0	858
TRINITY_DN177045_c0_g1	TRINITY_DN177045_c0_g1_i1	FvH4_6g43370.1	100	3e-94	276
TRINITY_DN177073_c0_g1	TRINITY_DN177073_c0_g1_i1	FvH4_4g27360.1	100	1e-70	222
TRINITY_DN17711_c0_g1	TRINITY_DN17711_c0_g1_i2	FvH4_4g28380.1	100	9e-13	63.2
TRINITY_DN17717_c0_g1	TRINITY_DN17717_c0_g1_i3	FvH4_3g37970.1	100	2e-47	157
TRINITY_DN17728_c0_g1	TRINITY_DN17728_c0_g1_i4	FvH4_1g01100.1	100	7e-78	241
TRINITY_DN17730_c0_g1	TRINITY_DN17730_c0_g1_i1	FvH4_5g10770.1	100	0	533
TRINITY_DN17736_c0_g1	TRINITY_DN17736_c0_g1_i1	FvH4_2g06570.1	100	0	541
TRINITY_DN17736_c0_g2	TRINITY_DN17736_c0_g2_i1	FvH4_2g06590.1	100	2e-84	256
TRINITY_DN1774_c0_g1	TRINITY_DN1774_c0_g1_i1	FvH4_3g23550.1	100	2e-37	136
TRINITY_DN177469_c0_g1	TRINITY_DN177469_c0_g1_i1	FvH4_1g15750.1	100	4e-109	316
TRINITY_DN17748_c0_g1	TRINITY_DN17748_c0_g1_i1	FvH4_6g40620.1	100	4e-175	494
TRINITY_DN17749_c0_g1	TRINITY_DN17749_c0_g1_i1	FvH4_2g10330.1	100	0	931
TRINITY_DN1775_c0_g1	TRINITY_DN1775_c0_g1_i2	FvH4_1g28720.1	100	0	1264
TRINITY_DN17752_c0_g1	TRINITY_DN17752_c0_g1_i2	FvH4_3g19740.1	100	0	625
TRINITY_DN17757_c0_g2	TRINITY_DN17757_c0_g2_i2	FvH4_5g23940.1	100	0	667
TRINITY_DN177646_c0_g1	TRINITY_DN177646_c0_g1_i1	FvH4_6g13440.1	100	9e-40	135
TRINITY_DN17769_c0_g1	TRINITY_DN17769_c0_g1_i1	FvH4_2g37650.1	100	0	1050
TRINITY_DN1777_c0_g1	TRINITY_DN1777_c0_g1_i9	FvH4_3g42730.1	100	4e-85	278
TRINITY_DN17776_c0_g1	TRINITY_DN17776_c0_g1_i1	FvH4_6g37140.1	100	5e-138	406
TRINITY_DN17779_c0_g2	TRINITY_DN17779_c0_g2_i1	FvH4_6g07900.1	100	5e-160	434
TRINITY_DN17784_c0_g2	TRINITY_DN17784_c0_g2_i1	FvH4_3g25040.1	100	4e-151	435
TRINITY_DN17785_c0_g1	TRINITY_DN17785_c0_g1_i2	FvH4_3g12020.1	100	0	581
TRINITY_DN17800_c0_g1	TRINITY_DN17800_c0_g1_i1	FvH4_2g24610.1	100	3e-76	237
TRINITY_DN17805_c0_g1	TRINITY_DN17805_c0_g1_i1	FvH4_6g38570.1	100	3e-75	205
TRINITY_DN1781_c0_g2	TRINITY_DN1781_c0_g2_i3	FvH4_4g07110.1	100	0	627
TRINITY_DN1781_c1_g1	TRINITY_DN1781_c1_g1_i1	FvH4_2g39690.1	100	0	550
TRINITY_DN1782_c2_g1	TRINITY_DN1782_c2_g1_i1	FvH4_6g34380.1	100	0	1073
TRINITY_DN1782_c5_g1	TRINITY_DN1782_c5_g1_i1	FvH4_1g19600.1	100	2e-42	151
TRINITY_DN17825_c0_g1	TRINITY_DN17825_c0_g1_i1	FvH4_7g04740.1	100	8e-141	409
TRINITY_DN1783_c0_g1	TRINITY_DN1783_c0_g1_i3	FvH4_7g32700.1	100	5e-25	98.6
TRINITY_DN1783_c0_g2	TRINITY_DN1783_c0_g2_i3	FvH4_5g31750.1	100	0	684
TRINITY_DN1783_c1_g2	TRINITY_DN1783_c1_g2_i2	FvH4_1g05870.1	100	0	944
TRINITY_DN1785_c0_g1	TRINITY_DN1785_c0_g1_i7	FvH4_1g11310.1	100	0	629
TRINITY_DN17854_c0_g1	TRINITY_DN17854_c0_g1_i1	FvH4_6g35450.1	100	7e-93	278
TRINITY_DN1787_c0_g1	TRINITY_DN1787_c0_g1_i4	FvH4_7g05840.1	100	0	1357
TRINITY_DN1788_c0_g1	TRINITY_DN1788_c0_g1_i8	FvH4_5g22570.1	100	0	1387
TRINITY_DN1788_c2_g1	TRINITY_DN1788_c2_g1_i1	FvH4_2g35630.1	100	1e-41	152
TRINITY_DN178816_c0_g1	TRINITY_DN178816_c0_g1_i1	FvH4_3g27570.1	100	7e-27	102
TRINITY_DN17882_c0_g1	TRINITY_DN17882_c0_g1_i1	FvH4_2g26630.1	100	8e-120	363
TRINITY_DN179_c0_g2	TRINITY_DN179_c0_g2_i1	FvH4_5g32590.1	100	0	765
TRINITY_DN17902_c0_g1	TRINITY_DN17902_c0_g1_i3	FvH4_4g16240.1	100	0	976
TRINITY_DN1791_c1_g1	TRINITY_DN1791_c1_g1_i1	FvH4_2g09500.1	100	0	1170
TRINITY_DN1793_c0_g1	TRINITY_DN1793_c0_g1_i2	FvH4_3g08330.1	100	2e-41	145
TRINITY_DN179334_c0_g1	TRINITY_DN179334_c0_g1_i1	FvH4_6g11920.1	100	4e-66	213
TRINITY_DN17936_c0_g1	TRINITY_DN17936_c0_g1_i9	FvH4_6g09420.1	100	9e-39	141
TRINITY_DN17938_c0_g1	TRINITY_DN17938_c0_g1_i4	FvH4_5g19170.1	100	8e-67	224
TRINITY_DN1794_c0_g2	TRINITY_DN1794_c0_g2_i4	FvH4_1g25890.1	100	2e-48	172
TRINITY_DN179401_c0_g1	TRINITY_DN179401_c0_g1_i1	FvH4_6g05810.1	100	2e-54	174
TRINITY_DN17968_c0_g1	TRINITY_DN17968_c0_g1_i1	FvH4_3g45970.1	100	1e-175	493
TRINITY_DN1797_c0_g1	TRINITY_DN1797_c0_g1_i5	FvH4_2g21290.1	100	0	1494
TRINITY_DN17981_c0_g1	TRINITY_DN17981_c0_g1_i3	FvH4_2g19300.1	100	0	640
TRINITY_DN17984_c0_g1	TRINITY_DN17984_c0_g1_i1	FvH4_4g17220.1	100	1e-39	133
TRINITY_DN17996_c0_g1	TRINITY_DN17996_c0_g1_i1	FvH4_6g52410.1	100	0	931
TRINITY_DN17999_c0_g1	TRINITY_DN17999_c0_g1_i2	FvH4_1g00650.1	100	0	818
TRINITY_DN1801_c0_g1	TRINITY_DN1801_c0_g1_i3	FvH4_5g04510.1	100	0	1107
TRINITY_DN1802_c0_g1	TRINITY_DN1802_c0_g1_i6	FvH4_5g03240.1	100	0	2914
TRINITY_DN18020_c0_g1	TRINITY_DN18020_c0_g1_i2	FvH4_4g05570.1	100	3e-33	123
TRINITY_DN1803_c0_g2	TRINITY_DN1803_c0_g2_i2	FvH4_4g14780.1	100	0	968
TRINITY_DN18042_c0_g2	TRINITY_DN18042_c0_g2_i1	FvH4_4g32180.1	100	3e-92	275
TRINITY_DN180435_c0_g1	TRINITY_DN180435_c0_g1_i1	FvH4_3g30440.1	100	9e-78	238
TRINITY_DN18057_c0_g1	TRINITY_DN18057_c0_g1_i1	FvH4_2g36940.1	100	4e-180	508
TRINITY_DN18066_c0_g1	TRINITY_DN18066_c0_g1_i1	FvH4_1g05060.1	100	4e-72	220
TRINITY_DN18081_c0_g1	TRINITY_DN18081_c0_g1_i3	FvH4_3g38160.1	100	0	936
TRINITY_DN1809_c0_g2	TRINITY_DN1809_c0_g2_i6	FvH4_6g09330.1	100	0	705
TRINITY_DN1810_c0_g1	TRINITY_DN1810_c0_g1_i8	FvH4_7g03990.1	100	0	1093
TRINITY_DN1810_c2_g1	TRINITY_DN1810_c2_g1_i2	FvH4_2g13460.1	100	6e-77	249
TRINITY_DN1810_c4_g1	TRINITY_DN1810_c4_g1_i1	FvH4_6g15560.1	100	0	1135
TRINITY_DN18103_c0_g2	TRINITY_DN18103_c0_g2_i1	FvH4_7g15050.1	100	0	1019
TRINITY_DN1811_c0_g3	TRINITY_DN1811_c0_g3_i1	FvH4_7g30480.1	100	2e-117	345
TRINITY_DN18119_c0_g1	TRINITY_DN18119_c0_g1_i2	FvH4_4g31320.1	100	0	775
TRINITY_DN1815_c0_g1	TRINITY_DN1815_c0_g1_i1	FvH4_1g16360.1	100	1e-60	202
TRINITY_DN181514_c0_g1	TRINITY_DN181514_c0_g1_i1	FvH4_2g15460.1	100	5e-121	357
TRINITY_DN1816_c0_g1	TRINITY_DN1816_c0_g1_i2	FvH4_3g27090.1	100	0	1828
TRINITY_DN1816_c0_g2	TRINITY_DN1816_c0_g2_i5	FvH4_5g26270.1	100	0	1654
TRINITY_DN1816_c1_g2	TRINITY_DN1816_c1_g2_i3	FvH4_5g37270.1	100	1e-174	506
TRINITY_DN18164_c0_g1	TRINITY_DN18164_c0_g1_i1	FvH4_3g19290.1	100	1e-52	182
TRINITY_DN18172_c0_g1	TRINITY_DN18172_c0_g1_i2	FvH4_6g24330.1	100	2e-74	247
TRINITY_DN18179_c0_g1	TRINITY_DN18179_c0_g1_i1	FvH4_4g07340.1	100	4e-86	273
TRINITY_DN1818_c0_g1	TRINITY_DN1818_c0_g1_i3	FvH4_5g22940.1	100	0	1414
TRINITY_DN182_c1_g1	TRINITY_DN182_c1_g1_i2	FvH4_5g07690.1	100	0	1268
TRINITY_DN1822_c0_g1	TRINITY_DN1822_c0_g1_i5	FvH4_1g26460.1	100	0	780
TRINITY_DN182320_c0_g1	TRINITY_DN182320_c0_g1_i1	FvH4_2g27400.1	100	3e-86	257
TRINITY_DN182434_c0_g1	TRINITY_DN182434_c0_g1_i1	FvH4_7g21810.1	100	4e-40	133
TRINITY_DN1825_c0_g1	TRINITY_DN1825_c0_g1_i8	FvH4_3g07810.1	100	2e-158	495
TRINITY_DN1825_c0_g3	TRINITY_DN1825_c0_g3_i1	FvH4_5g35740.1	100	5e-142	424
TRINITY_DN18255_c0_g1	TRINITY_DN18255_c0_g1_i4	FvH4_7g13350.1	100	0	1464
TRINITY_DN18258_c0_g2	TRINITY_DN18258_c0_g2_i2	FvH4_5g26790.1	100	3e-110	340
TRINITY_DN1827_c1_g1	TRINITY_DN1827_c1_g1_i3	FvH4_2g35190.1	100	0	966
TRINITY_DN18271_c0_g1	TRINITY_DN18271_c0_g1_i1	FvH4_7g28500.1	100	0	935
TRINITY_DN18275_c0_g1	TRINITY_DN18275_c0_g1_i1	FvH4_3g38530.1	100	0	838
TRINITY_DN1828_c0_g1	TRINITY_DN1828_c0_g1_i2	FvH4_2g27210.1	100	0	1433
TRINITY_DN18282_c0_g1	TRINITY_DN18282_c0_g1_i2	FvH4_3g38240.1	100	5e-136	395
TRINITY_DN18290_c0_g1	TRINITY_DN18290_c0_g1_i2	FvH4_7g10990.1	100	0	573
TRINITY_DN1830_c0_g1	TRINITY_DN1830_c0_g1_i2	FvH4_2g12610.1	100	0	655
TRINITY_DN1830_c0_g3	TRINITY_DN1830_c0_g3_i2	FvH4_2g12820.1	100	0	1154
TRINITY_DN1830_c2_g1	TRINITY_DN1830_c2_g1_i2	FvH4_5g12270.1	100	1e-52	180
TRINITY_DN18303_c0_g1	TRINITY_DN18303_c0_g1_i4	FvH4_6g53850.1	100	0	1266
TRINITY_DN1831_c0_g1	TRINITY_DN1831_c0_g1_i1	FvH4_2g38630.1	100	3e-120	346
TRINITY_DN18319_c0_g2	TRINITY_DN18319_c0_g2_i4	FvH4_2g37610.1	100	0	1246
TRINITY_DN18320_c0_g1	TRINITY_DN18320_c0_g1_i1	FvH4_1g22110.1	100	1e-149	423
TRINITY_DN18331_c0_g1	TRINITY_DN18331_c0_g1_i1	FvH4_6g00880.1	100	0	1064
TRINITY_DN183358_c0_g1	TRINITY_DN183358_c0_g1_i1	FvH4_6g03460.1	100	1e-95	280
TRINITY_DN18338_c0_g1	TRINITY_DN18338_c0_g1_i1	FvH4_5g36960.1	100	0	622
TRINITY_DN1834_c1_g1	TRINITY_DN1834_c1_g1_i3	FvH4_7g30820.1	100	4e-99	317
TRINITY_DN18349_c0_g1	TRINITY_DN18349_c0_g1_i1	FvH4_6g00530.1	100	2e-127	368
TRINITY_DN1836_c0_g1	TRINITY_DN1836_c0_g1_i1	FvH4_2g20670.1	100	2e-91	278
TRINITY_DN18366_c0_g1	TRINITY_DN18366_c0_g1_i1	FvH4_3g39090.1	100	3e-150	433
TRINITY_DN1837_c0_g1	TRINITY_DN1837_c0_g1_i6	FvH4_3g28820.1	100	1e-158	472
TRINITY_DN18370_c0_g1	TRINITY_DN18370_c0_g1_i1	FvH4_2g29000.1	100	0	684
TRINITY_DN183762_c0_g1	TRINITY_DN183762_c0_g1_i1	FvH4_3g11540.1	100	1e-84	252
TRINITY_DN18379_c0_g1	TRINITY_DN18379_c0_g1_i1	FvH4_2g38210.1	100	3e-83	260
TRINITY_DN1838_c0_g20	TRINITY_DN1838_c0_g2_i10	FvH4_4g04620.1	100	4e-152	462
TRINITY_DN1838_c1_g1	TRINITY_DN1838_c1_g1_i1	FvH4_2g09080.1	100	0	677
TRINITY_DN18382_c0_g1	TRINITY_DN18382_c0_g1_i3	FvH4_6g42220.1	100	0	777
TRINITY_DN183831_c0_g1	TRINITY_DN183831_c0_g1_i1	FvH4_5g17870.1	100	9e-47	151
TRINITY_DN18392_c0_g1	TRINITY_DN18392_c0_g1_i3	FvH4_3g18910.1	100	0	800
TRINITY_DN18398_c0_g1	TRINITY_DN18398_c0_g1_i4	FvH4_2g24350.1	100	0	808
TRINITY_DN184176_c0_g1	TRINITY_DN184176_c0_g1_i1	FvH4_6g10320.1	100	1e-104	304
TRINITY_DN18423_c0_g3	TRINITY_DN18423_c0_g3_i1	FvH4_3g22570.1	100	4e-57	184
TRINITY_DN18428_c0_g1	TRINITY_DN18428_c0_g1_i1	FvH4_6g09260.1	100	2e-162	465
[truncated: 14,428 more rows]

## Sheet: NCBI_Nr
Trinity_ID	Longest transcript isoforms_ID	F. vesca Hawaii4_ID	pct_identity	e_value	Bit_Score	Description
TRINITY_DN3888_c0_g3	TRINITY_DN3888_c0_g3_i1	FvH4_1g05400.1	100	0	1090	(-)-alpha-pinene synthase-like [Fragaria vesca subsp. vesca]
TRINITY_DN20472_c1_g1	TRINITY_DN20472_c1_g1_i2	FvH4_4g27950.1	100	3e-132	385	(-)-germacrene D synthase-like [Fragaria vesca subsp. vesca]
TRINITY_DN20160_c0_g2	TRINITY_DN20160_c0_g2_i2	FvH4_5g35700.1	100	0	723	(-)-germacrene D synthase-like isoform X2 [Fragaria vesca subsp. vesca]
TRINITY_DN9310_c0_g1	TRINITY_DN9310_c0_g1_i1	FvH4_5g01940.1	100	4e-76	229	(-)-isopiperitenone reductase-like [Fragaria vesca subsp. vesca]
TRINITY_DN9734_c0_g1	TRINITY_DN9734_c0_g1_i1	FvH4_6g37470.1	100	0	1150	(R)-mandelonitrile lyase-like [Fragaria vesca subsp. vesca]
TRINITY_DN512_c0_g1	TRINITY_DN512_c0_g1_i2	FvH4_5g17220.1	100	0	712	(R,S)-reticuline 7-O-methyltransferase-like [Fragaria vesca subsp. vesca]
TRINITY_DN19766_c0_g1	TRINITY_DN19766_c0_g1_i1	FvH4_4g01130.1	100	2e-137	389	1,2-dihydroxy-3-keto-5-methylthiopentene dioxygenase 1 [Fragaria vesca subsp. vesca]
TRINITY_DN4929_c0_g1	TRINITY_DN4929_c0_g1_i2	FvH4_4g34130.1	100	0	689	1,4-dihydroxy-2-naphthoyl-CoA synthase, peroxisomal isoform X1 [Fragaria vesca subsp. vesca]
TRINITY_DN25399_c0_g1	TRINITY_DN25399_c0_g1_i1	FvH4_5g33170.1	100	0	743	11-beta-hydroxysteroid dehydrogenase-like 5 [Fragaria vesca subsp. vesca]
TRINITY_DN28059_c0_g2	TRINITY_DN28059_c0_g2_i1	FvH4_3g34840.1	100	0	655	11S globulin seed storage protein 2-like [Fragaria vesca subsp. vesca]
TRINITY_DN28059_c0_g3	TRINITY_DN28059_c0_g3_i1	FvH4_3g34830.1	100	0	697	11S globulin seed storage protein 2-like [Fragaria vesca subsp. vesca]
TRINITY_DN2384_c1_g4	TRINITY_DN2384_c1_g4_i1	FvH4_6g19220.1	100	0	2088	125 kDa kinesin-related protein isoform X2 [Fragaria vesca subsp. vesca]
TRINITY_DN1392_c0_g1	TRINITY_DN1392_c0_g1_i4	FvH4_1g08510.1	100	0	816	12-oxophytodienoate reductase 3-like [Fragaria vesca subsp. vesca]
TRINITY_DN1748_c2_g1	TRINITY_DN1748_c2_g1_i1	FvH4_5g00100.1	100	2e-57	189	14 kDa proline-rich protein DC2.15 [Fragaria vesca subsp. vesca]
TRINITY_DN9383_c0_g1	TRINITY_DN9383_c0_g1_i1	FvH4_2g28920.1	100	1e-49	165	14 kDa proline-rich protein DC2.15-like [Fragaria vesca subsp. vesca]
TRINITY_DN3808_c0_g3	TRINITY_DN3808_c0_g3_i2	FvH4_1g29350.1	100	3e-113	326	14 kDa zinc-binding protein [Fragaria vesca subsp. vesca]
TRINITY_DN1825_c0_g1	TRINITY_DN1825_c0_g1_i8	FvH4_3g07810.1	100	2e-158	495	14-3-3-like protein B [Fragaria vesca subsp. vesca]
TRINITY_DN1825_c0_g3	TRINITY_DN1825_c0_g3_i1	FvH4_5g35740.1	100	5e-142	424	14-3-3-like protein B [Fragaria vesca subsp. vesca]
TRINITY_DN11804_c0_g1	TRINITY_DN11804_c0_g1_i1	FvH4_4g12260.1	100	0	747	15-cis-zeta-carotene isomerase, chloroplastic [Fragaria vesca subsp. vesca]
TRINITY_DN17854_c0_g1	TRINITY_DN17854_c0_g1_i1	FvH4_6g35450.1	100	7e-93	278	17.4 kDa class III heat shock protein [Fragaria vesca subsp. vesca]
TRINITY_DN22088_c0_g1	TRINITY_DN22088_c0_g1_i1	FvH4_3g37320.1	100	3e-76	235	17.8 kDa class I heat shock protein-like [Fragaria vesca subsp. vesca]
TRINITY_DN2058_c0_g1	TRINITY_DN2058_c0_g1_i1	FvH4_7g23710.1	100	2e-89	276	18.1 kDa class I heat shock protein-like [Fragaria vesca subsp. vesca]
TRINITY_DN9175_c0_g1	TRINITY_DN9175_c0_g1_i1	FvH4_3g13900.1	100	2e-98	286	18.1 kDa class I heat shock protein-like [Fragaria vesca subsp. vesca]
TRINITY_DN276_c0_g1	TRINITY_DN276_c0_g1_i6	FvH4_1g00880.1	100	4e-65	215	1-acyl-sn-glycerol-3-phosphate acyltransferase 1, chloroplastic-like [Fragaria vesca subsp. vesca]
TRINITY_DN327357_c0_g1	TRINITY_DN327357_c0_g1_i1	FvH4_2g27800.1	100	0	597	1-aminocyclopropane-1-carboxylate oxidase [Fragaria vesca subsp. vesca]
TRINITY_DN4022_c0_g2	TRINITY_DN4022_c0_g2_i1	FvH4_3g01280.1	100	0	606	1-aminocyclopropane-1-carboxylate oxidase 1 [Fragaria vesca subsp. vesca]
TRINITY_DN7049_c0_g1	TRINITY_DN7049_c0_g1_i1	FvH4_2g21910.1	100	0	423	1-aminocyclopropane-1-carboxylate oxidase homolog 11-like [Fragaria vesca subsp. vesca]
TRINITY_DN7049_c0_g2	TRINITY_DN7049_c0_g2_i1	FvH4_2g21900.1	100	4e-35	120	1-aminocyclopropane-1-carboxylate oxidase homolog 4-like [Rosa chinensis]<>putative deacetoxyvindoline 4-hydroxylase [Rosa chinensis]
TRINITY_DN1352_c1_g1	TRINITY_DN1352_c1_g1_i2	FvH4_1g18490.1	100	0	897	1-aminocyclopropane-1-carboxylate synthase [Fragaria vesca subsp. vesca]
TRINITY_DN2718_c0_g1	TRINITY_DN2718_c0_g1_i1	FvH4_7g15310.1	100	0	986	1-aminocyclopropane-1-carboxylate synthase 1-like [Fragaria vesca subsp. vesca]
TRINITY_DN13153_c0_g1	TRINITY_DN13153_c0_g1_i1	FvH4_1g06960.1	100	0	890	1-aminocyclopropane-1-carboxylate synthase 7 isoform X2 [Fragaria vesca subsp. vesca]
TRINITY_DN330280_c0_g1	TRINITY_DN330280_c0_g1_i1	FvH4_4g21120.1	100	1e-162	456	1-Cys peroxiredoxin [Fragaria vesca subsp. vesca]
TRINITY_DN10249_c0_g1	TRINITY_DN10249_c0_g1_i1	FvH4_6g35770.1	100	0	3571	1-phosphatidylinositol-3-phosphate 5-kinase FAB1B [Fragaria vesca subsp. vesca]<>1-phosphatidylinositol-3-phosphate 5-kinase FAB1B [Fragaria vesca subsp. vesca]
TRINITY_DN13923_c0_g1	TRINITY_DN13923_c0_g1_i1	FvH4_5g00430.1	100	7e-142	405	21 kDa protein [Fragaria vesca subsp. vesca]
TRINITY_DN170848_c0_g1	TRINITY_DN170848_c0_g1_i1	FvH4_7g11390.1	100	2e-145	411	21 kDa protein [Fragaria vesca subsp. vesca]
TRINITY_DN170929_c0_g1	TRINITY_DN170929_c0_g1_i1	FvH4_5g00420.1	100	2e-129	375	21 kDa protein [Fragaria vesca subsp. vesca]
TRINITY_DN2472_c2_g1	TRINITY_DN2472_c2_g1_i1	FvH4_1g09220.1	100	8e-117	341	21 kDa protein [Fragaria vesca subsp. vesca]
TRINITY_DN273909_c0_g1	TRINITY_DN273909_c0_g1_i1	FvH4_4g33950.1	100	3e-131	377	21 kDa protein [Fragaria vesca subsp. vesca]
TRINITY_DN4176_c0_g1	TRINITY_DN4176_c0_g1_i1	FvH4_7g27850.1	100	1e-111	340	21 kDa protein [Fragaria vesca subsp. vesca]
TRINITY_DN13276_c0_g1	TRINITY_DN13276_c0_g1_i1	FvH4_7g27830.1	100	5e-106	311	21 kDa protein-like [Fragaria vesca subsp. vesca]
TRINITY_DN4945_c0_g1	TRINITY_DN4945_c0_g1_i5	FvH4_3g21680.1	100	7e-56	194	21.7 kDa class VI heat shock protein [Fragaria vesca subsp. vesca]<>21.7 kDa class VI heat shock protein [Fragaria vesca subsp. vesca]
TRINITY_DN8920_c1_g1	TRINITY_DN8920_c1_g1_i4	FvH4_6g21590.1	100	4e-87	274	26.5 kDa heat shock protein, mitochondrial-like [Fragaria vesca subsp. vesca]
TRINITY_DN5095_c0_g1	TRINITY_DN5095_c0_g1_i2	FvH4_2g09690.1	100	0	812	26S protease regulatory subunit 10B homolog A [Fragaria vesca subsp. vesca]
TRINITY_DN65617_c0_g1	TRINITY_DN65617_c0_g1_i2	FvH4_6g06600.1	100	0	599	26S protease regulatory subunit 6A homolog [Fragaria vesca subsp. vesca]
TRINITY_DN7575_c0_g1	TRINITY_DN7575_c0_g1_i1	FvH4_6g36060.1	100	0	602	26S protease regulatory subunit 7 [Striga asiatica]
TRINITY_DN13626_c0_g1	TRINITY_DN13626_c0_g1_i2	FvH4_1g03980.1	100	0	813	26S protease regulatory subunit 8 homolog A [Fragaria vesca subsp. vesca]
TRINITY_DN13600_c0_g1	TRINITY_DN13600_c0_g1_i2	FvH4_2g09670.1	100	0	693	26S protease regulatory subunit S10B homolog B-like [Fragaria vesca subsp. vesca]
TRINITY_DN8076_c0_g1	TRINITY_DN8076_c0_g1_i1	FvH4_4g00680.1	100	0	1761	26S proteasome non-ATPase regulatory subunit 1 homolog A-like [Fragaria vesca subsp. vesca]
TRINITY_DN21217_c1_g1	TRINITY_DN21217_c1_g1_i1	FvH4_4g30470.1	100	3e-167	483	26S proteasome non-ATPase regulatory subunit 10 [Fragaria vesca subsp. vesca]
TRINITY_DN3949_c0_g1	TRINITY_DN3949_c0_g1_i1	FvH4_4g30750.1	100	0	712	26S proteasome non-ATPase regulatory subunit 11 homolog [Fragaria vesca subsp. vesca]
TRINITY_DN11696_c0_g1	TRINITY_DN11696_c0_g1_i1	FvH4_5g23350.1	100	1e-133	406	26S proteasome non-ATPase regulatory subunit 13 homolog B [Fragaria vesca subsp. vesca]
TRINITY_DN11656_c0_g1	TRINITY_DN11656_c0_g1_i1	FvH4_2g01440.1	100	0	674	26S proteasome non-ATPase regulatory subunit 4 homolog [Fragaria vesca subsp. vesca]
TRINITY_DN3630_c1_g1	TRINITY_DN3630_c1_g1_i1	FvH4_3g25540.1	100	0	786	26S proteasome non-ATPase regulatory subunit 6 homolog [Fragaria vesca subsp. vesca]
TRINITY_DN1930_c1_g4	TRINITY_DN1930_c1_g4_i1	FvH4_6g11900.1	100	0	580	26S proteasome non-ATPase regulatory subunit 7 homolog A [Fragaria vesca subsp. vesca]
TRINITY_DN16705_c0_g2	TRINITY_DN16705_c0_g2_i1	FvH4_5g11650.1	100	5e-174	506	26S proteasome non-ATPase regulatory subunit 8 homolog A [Fragaria vesca subsp. vesca]
TRINITY_DN2926_c0_g2	TRINITY_DN2926_c0_g2_i1	FvH4_1g00940.1	100	3e-121	357	26S proteasome non-ATPase regulatory subunit 9 [Fragaria vesca subsp. vesca]
TRINITY_DN11273_c0_g1	TRINITY_DN11273_c0_g1_i1	FvH4_2g19750.1	100	0	839	26S proteasome regulatory subunit 4 homolog A [Fragaria vesca subsp. vesca]
TRINITY_DN57786_c0_g1	TRINITY_DN57786_c0_g1_i1	FvH4_3g38770.1	100	0	844	26S proteasome regulatory subunit 4 homolog B-like [Fragaria vesca subsp. vesca]
TRINITY_DN12518_c0_g2	TRINITY_DN12518_c0_g2_i1	FvH4_5g36390.1	100	6e-177	507	28 kDa ribonucleoprotein, chloroplastic [Fragaria vesca subsp. vesca]
TRINITY_DN142_c1_g1	TRINITY_DN142_c1_g1_i6	FvH4_5g06660.1	100	8e-173	523	28 kDa ribonucleoprotein, chloroplastic [Fragaria vesca subsp. vesca]
TRINITY_DN17545_c2_g1	TRINITY_DN17545_c2_g1_i1	FvH4_4g26680.1	100	9e-29	109	28 kDa ribonucleoprotein, chloroplastic [Rosa chinensis]<>putative RNA recognition motif domain, nucleotide-binding alpha-beta plait domain-containing protein [Rosa chinensis]
TRINITY_DN1126_c0_g1	TRINITY_DN1126_c0_g1_i1	FvH4_1g00330.1	100	0	769	2-alkenal reductase (NADP(+)-dependent)-like [Fragaria vesca subsp. vesca]
TRINITY_DN1343_c0_g1	TRINITY_DN1343_c0_g1_i1	FvH4_6g43120.1	100	0	709	2-alkenal reductase (NADP(+)-dependent)-like [Fragaria vesca subsp. vesca]
TRINITY_DN14755_c1_g1	TRINITY_DN14755_c1_g1_i1	FvH4_2g06540.1	100	0	599	2-hydroxyisoflavanone dehydratase-like [Fragaria vesca subsp. vesca]
TRINITY_DN18763_c1_g1	TRINITY_DN18763_c1_g1_i1	FvH4_4g01830.1	100	0	731	2-isopropylmalate synthase
TRINITY_DN15704_c0_g1	TRINITY_DN15704_c0_g1_i1	FvH4_2g29380.1	100	4e-37	128	2-keto-3-deoxy-L-rhamnonate aldolase-like
TRINITY_DN7641_c0_g1	TRINITY_DN7641_c0_g1_i1	FvH4_4g34500.1	100	0	609	2-methylene-furan-3-one reductase [Fragaria vesca subsp. vesca]
TRINITY_DN5271_c0_g1	TRINITY_DN5271_c0_g1_i5	FvH4_1g24490.1	100	0	650	2-oxoisovalerate dehydrogenase subunit alpha 2, mitochondrial [Fragaria vesca subsp. vesca]
TRINITY_DN8918_c0_g1	TRINITY_DN8918_c0_g1_i2	FvH4_7g00530.1	100	3e-152	437	30S ribosomal protein 2, chloroplastic [Fragaria vesca subsp. vesca]
TRINITY_DN12008_c0_g1	TRINITY_DN12008_c0_g1_i1	FvH4_6g45210.1	100	3e-97	287	30S ribosomal protein 3, chloroplastic-like [Fragaria vesca subsp. vesca]
TRINITY_DN11482_c0_g1	TRINITY_DN11482_c0_g1_i5	FvH4_4g12580.1	100	0	875	30S ribosomal protein S1 isoform X1
TRINITY_DN9298_c0_g1	TRINITY_DN9298_c0_g1_i3	FvH4_3g29500.1	100	2e-117	353	30S ribosomal protein S10, chloroplastic [Fragaria vesca subsp. vesca]<>30S ribosomal protein S10, chloroplastic [Fragaria vesca subsp. vesca]<>30S ribosomal protein S10, chloroplastic [Fragaria vesca subsp. vesca]
TRINITY_DN14905_c0_g1	TRINITY_DN14905_c0_g1_i4	FvH4_c3g00060.1	100	2e-73	223	30S ribosomal protein S11, chloroplastic
TRINITY_DN18818_c0_g1	TRINITY_DN18818_c0_g1_i1	FvH4_2g34190.1	100	1e-32	111	30S ribosomal protein S5, chloroplastic isoform X1 [Rosa chinensis]<>putative ribosomal protein S5 [Rosa chinensis]
TRINITY_DN3146_c1_g1	TRINITY_DN3146_c1_g1_i2	FvH4_3g08970.1	100	5e-138	429	30S ribosomal protein S5, chloroplastic isoform X2 [Fragaria vesca subsp. vesca]
TRINITY_DN22027_c0_g2	TRINITY_DN22027_c0_g2_i1	FvH4_5g26680.1	100	2e-133	387	30S ribosomal protein S9, chloroplastic [Fragaria vesca subsp. vesca]
TRINITY_DN23257_c0_g1	TRINITY_DN23257_c0_g1_i1	FvH4_5g22330.1	100	5e-172	491	33 kDa ribonucleoprotein, chloroplastic [Fragaria vesca subsp. vesca]
TRINITY_DN4586_c0_g1	TRINITY_DN4586_c0_g1_i1	FvH4_6g20490.1	100	4e-57	192	33 kDa ribonucleoprotein, chloroplastic [Fragaria vesca subsp. vesca]
TRINITY_DN15410_c0_g1	TRINITY_DN15410_c0_g1_i1	FvH4_5g00120.1	100	2e-31	120	36.4 kDa proline-rich protein [Eutrema salsugineum]<>hypothetical protein EUTSA_v10023531mg [Eutrema salsugineum]
TRINITY_DN32436_c0_g2	TRINITY_DN32436_c0_g2_i1	FvH4_5g16620.1	100	8e-80	249	39S ribosomal protein L47, mitochondrial [Fragaria vesca subsp. vesca]
TRINITY_DN3268_c0_g1	TRINITY_DN3268_c0_g1_i9	FvH4_4g14820.1	100	0	619	3-dehydrosphinganine reductase TSC10A-like [Fragaria vesca subsp. vesca]
TRINITY_DN5211_c0_g1	TRINITY_DN5211_c0_g1_i2	FvH4_3g20180.1	100	0	548	3-deoxy-manno-octulosonate cytidylyltransferase, mitochondrial [Fragaria vesca subsp. vesca]
TRINITY_DN1452_c0_g3	TRINITY_DN1452_c0_g3_i1	FvH4_1g12330.1	100	0	995	3-epi-6-deoxocathasterone 23-monooxygenase [Fragaria vesca subsp. vesca]
TRINITY_DN19286_c0_g2	TRINITY_DN19286_c0_g2_i1	FvH4_6g27700.1	100	0	632	3Fe-4S ferredoxin
TRINITY_DN13158_c0_g1	TRINITY_DN13158_c0_g1_i1	FvH4_7g29240.1	100	2e-146	412	3-hexulose-6-phosphate isomerase-like
TRINITY_DN3941_c0_g2	TRINITY_DN3941_c0_g2_i1	FvH4_5g26180.1	100	0	998	3-hydroxy-3-methylglutaryl-coenzyme A reductase 1 [Fragaria vesca subsp. vesca]
TRINITY_DN14694_c0_g5	TRINITY_DN14694_c0_g5_i1	FvH4_7g18470.1	100	0	735	3-hydroxyisobutyryl-CoA hydrolase 1-like [Fragaria vesca subsp. vesca]
TRINITY_DN14694_c1_g2	TRINITY_DN14694_c1_g2_i1	FvH4_7g06750.1	100	0	707	3-hydroxyisobutyryl-CoA hydrolase 1-like [Fragaria vesca subsp. vesca]
TRINITY_DN26425_c0_g1	TRINITY_DN26425_c0_g1_i1	FvH4_7g09160.1	100	5e-174	491	3-hydroxyisobutyryl-CoA hydrolase 1-like [Fragaria vesca subsp. vesca]
TRINITY_DN3585_c0_g1	TRINITY_DN3585_c0_g1_i1	FvH4_7g15030.1	100	0	810	3-hydroxyisobutyryl-CoA hydrolase 1-like [Fragaria vesca subsp. vesca]
TRINITY_DN4141_c0_g1	TRINITY_DN4141_c0_g1_i4	FvH4_4g04710.1	100	5e-119	376	3-isopropylmalate dehydratase large subunit-like [Fragaria vesca subsp. vesca]
TRINITY_DN2983_c0_g1	TRINITY_DN2983_c0_g1_i1	FvH4_2g36990.1	100	0	691	3-ketoacyl-CoA synthase 10 [Fragaria vesca subsp. vesca]
TRINITY_DN11889_c0_g3	TRINITY_DN11889_c0_g3_i1	FvH4_4g01980.1	100	0	1080	3-ketoacyl-CoA synthase 11-like [Fragaria vesca subsp. vesca]
TRINITY_DN10181_c0_g1	TRINITY_DN10181_c0_g1_i3	FvH4_2g29750.1	100	0	1025	3-ketoacyl-CoA synthase 11-like [Fragaria vesca subsp. vesca]<>3-ketoacyl-CoA synthase 11-like [Fragaria vesca subsp. vesca]
TRINITY_DN6771_c0_g1	TRINITY_DN6771_c0_g1_i1	FvH4_3g34690.1	100	0	969	3-ketoacyl-CoA synthase 12 [Fragaria vesca subsp. vesca]
TRINITY_DN10181_c0_g3	TRINITY_DN10181_c0_g3_i1	FvH4_7g17440.1	100	0	1077	3-ketoacyl-CoA synthase 1-like [Fragaria vesca subsp. vesca]
TRINITY_DN18271_c0_g1	TRINITY_DN18271_c0_g1_i1	FvH4_7g28500.1	100	0	935	3-ketoacyl-CoA synthase 6-like [Fragaria vesca subsp. vesca]
TRINITY_DN9440_c0_g1	TRINITY_DN9440_c0_g1_i2	FvH4_4g00310.1	100	0	811	3-ketoacyl-CoA thiolase 2, peroxisomal [Fragaria vesca subsp. vesca]
TRINITY_DN9350_c0_g1	TRINITY_DN9350_c0_g1_i2	FvH4_5g32470.1	100	0	554	3-oxoacyl-[acyl-carrier-protein] reductase, chloroplastic-like [Fragaria vesca subsp. vesca]
TRINITY_DN2185_c1_g1	TRINITY_DN2185_c1_g1_i4	FvH4_3g05870.1	100	0	703	3-oxoacyl-[acyl-carrier-protein] synthase I, chloroplastic [Fragaria vesca subsp. vesca]
TRINITY_DN261357_c0_g1	TRINITY_DN261357_c0_g1_i1	FvH4_3g38520.1	100	0	802	3-oxo-Delta(4,5)-steroid 5-beta-reductase [Fragaria vesca subsp. vesca]
TRINITY_DN7946_c0_g1	TRINITY_DN7946_c0_g1_i1	FvH4_7g18280.1	100	0	589	3-phosphoinositide-dependent protein kinase 2 [Fragaria vesca subsp. vesca]
TRINITY_DN27905_c0_g1	TRINITY_DN27905_c0_g1_i3	FvH4_1g01810.1	100	5e-101	300	40S ribosomal protein S11-like [Fragaria vesca subsp. vesca]
TRINITY_DN858_c0_g12	TRINITY_DN858_c0_g1_i12	FvH4_3g23910.1	100	1e-83	271	40S ribosomal protein S15a-2-like [Fragaria vesca subsp. vesca]
TRINITY_DN4311_c0_g1	TRINITY_DN4311_c0_g1_i1	FvH4_3g35100.1	100	2e-38	140	40S ribosomal protein S15a-like [Brassica napus]<>hypothetical protein DY000_02018026 [Brassica cretica]
TRINITY_DN1609_c0_g3	TRINITY_DN1609_c0_g3_i1	FvH4_4g14990.1	100	3e-99	294	40S ribosomal protein S16 [Fragaria vesca subsp. vesca]<>40S ribosomal protein S16-like [Rosa chinensis]<>putative ribosomal protein S9 [Rosa chinensis]
TRINITY_DN1609_c0_g1	TRINITY_DN1609_c0_g1_i1	FvH4_2g05750.1	100	2e-99	300	40S ribosomal protein S16-like [Fragaria vesca subsp. vesca]
TRINITY_DN10919_c1_g2	TRINITY_DN10919_c1_g2_i1	FvH4_2g13900.1	100	7e-84	254	40S ribosomal protein S17-like [Fragaria vesca subsp. vesca]
TRINITY_DN65_c0_g1	TRINITY_DN65_c0_g1_i1	FvH4_4g17990.1	100	1e-36	132	40S ribosomal protein S21-2 [Fragaria vesca subsp. vesca]
TRINITY_DN20918_c0_g1	TRINITY_DN20918_c0_g1_i1	FvH4_6g03600.1	100	3e-81	249	40S ribosomal protein S24-1-like [Fragaria vesca subsp. vesca]
TRINITY_DN439_c0_g2	TRINITY_DN439_c0_g2_i4	FvH4_2g09240.1	100	2e-46	161	40S ribosomal protein S25 [Fragaria vesca subsp. vesca]<>40S ribosomal protein S25 [Fragaria vesca subsp. vesca]<>40S ribosomal protein S25 isoform X1 [Rosa chinensis]<>40S ribosomal protein S25 isoform X2 [Rosa chinensis]<>40S ribosomal protein S25 [Rosa chinensis]<>40S ribosomal protein S25 [Rosa chinensis]<>putative ribosomal protein S25 [Rosa chinensis]<>putative ribosomal protein S25 [Rosa c…
TRINITY_DN848_c0_g1	TRINITY_DN848_c0_g1_i3	FvH4_3g31160.1	100	8e-39	141	40S ribosomal protein S26-1 [Rosa chinensis]<>putative ribosomal protein S26e [Rosa chinensis]
TRINITY_DN1665_c0_g3	TRINITY_DN1665_c0_g3_i3	FvH4_4g22340.1	100	9e-52	176	40S ribosomal protein S27-2-like [Fragaria vesca subsp. vesca]
TRINITY_DN6101_c0_g1	TRINITY_DN6101_c0_g1_i1	FvH4_4g00850.1	100	2e-151	442	40S ribosomal protein S3a [Fragaria vesca subsp. vesca]
TRINITY_DN6448_c0_g1	TRINITY_DN6448_c0_g1_i6	FvH4_7g25090.1	100	2e-156	473	40S ribosomal protein S4-like [Fragaria vesca subsp. vesca]
TRINITY_DN752_c0_g1	TRINITY_DN752_c0_g1_i1	FvH4_2g26500.1	100	1e-148	422	40S ribosomal protein S5 [Fragaria vesca subsp. vesca]
TRINITY_DN5680_c0_g4	TRINITY_DN5680_c0_g4_i1	FvH4_2g18130.1	100	2e-117	343	40S ribosomal protein S8-like [Fragaria vesca subsp. vesca]
TRINITY_DN574_c0_g1	TRINITY_DN574_c0_g1_i2	FvH4_5g30400.1	100	0	555	40S ribosomal protein Sa-2-like [Fragaria vesca subsp. vesca]
TRINITY_DN1206_c0_g3	TRINITY_DN1206_c0_g3_i1	FvH4_6g27940.1	100	0	1033	4-coumarate--CoA ligase 1-like [Fragaria vesca subsp. vesca]
TRINITY_DN11859_c0_g1	TRINITY_DN11859_c0_g1_i2	FvH4_6g16460.1	100	0	989	4-coumarate--CoA ligase-like 7 [Fragaria vesca subsp. vesca]
TRINITY_DN17326_c0_g1	TRINITY_DN17326_c0_g1_i2	FvH4_3g30980.1	100	0	1088	4-coumarate--CoA ligase-like 7 [Fragaria vesca subsp. vesca]
TRINITY_DN13555_c1_g1	TRINITY_DN13555_c1_g1_i3	FvH4_3g27650.1	100	0	628	4-diphosphocytidyl-2-C-methyl-D-erythritol kinase, chloroplastic/chromoplastic isoform X2 [Fragaria vesca subsp. vesca]
TRINITY_DN10269_c0_g2	TRINITY_DN10269_c0_g2_i1	FvH4_2g07930.1	100	0	647	4-hydroxy-3-methylbut-2-enyl diphosphate reductase, chloroplastic [Fragaria vesca subsp. vesca]
TRINITY_DN17395_c0_g1	TRINITY_DN17395_c0_g1_i1	FvH4_2g28040.1	100	0	796	4-hydroxycoumarin synthase 1-like [Fragaria vesca subsp. vesca]
TRINITY_DN9394_c0_g1	TRINITY_DN9394_c0_g1_i2	FvH4_7g12060.1	100	0	696	4-hydroxy-tetrahydrodipicolinate synthase, chloroplastic-like isoform X1 [Fragaria vesca subsp. vesca]
TRINITY_DN6691_c0_g1	TRINITY_DN6691_c0_g1_i1	FvH4_5g33440.1	100	2e-64	202	50S ribosomal protein 6, chloroplastic [Fragaria vesca subsp. vesca]
TRINITY_DN14258_c0_g1	TRINITY_DN14258_c0_g1_i1	FvH4_2g21340.1	100	2e-150	428	50S ribosomal protein L10, chloroplastic [Fragaria vesca subsp. vesca]
TRINITY_DN5370_c0_g1	TRINITY_DN5370_c0_g1_i2	FvH4_5g10460.1	100	1e-53	186	50S ribosomal protein L11, chloroplastic [Fragaria vesca subsp. vesca]
TRINITY_DN18457_c0_g1	TRINITY_DN18457_c0_g1_i1	FvH4_5g05340.1	100	1e-114	340	50S ribosomal protein L12, chloroplastic [Fragaria vesca subsp. vesca]<>50S ribosomal protein L12, chloroplastic [Fragaria vesca subsp. vesca]
TRINITY_DN5000_c0_g1	TRINITY_DN5000_c0_g1_i1	FvH4_1g12480.1	100	4e-91	284	50S ribosomal protein L12, cyanelle [Fragaria vesca subsp. vesca]<>50S ribosomal protein L12, cyanelle [Fragaria vesca subsp. vesca]
TRINITY_DN6780_c1_g1	TRINITY_DN6780_c1_g1_i1	FvH4_6g50910.1	100	1e-44	147	50S ribosomal protein L12-1, chloroplastic-like [Fragaria vesca subsp. vesca]
TRINITY_DN18441_c0_g1	TRINITY_DN18441_c0_g1_i1	FvH4_6g53020.1	100	1e-86	271	50S ribosomal protein L13, chloroplastic [Fragaria vesca subsp. vesca]
TRINITY_DN13293_c0_g1	TRINITY_DN13293_c0_g1_i1	FvH4_4g27310.1	100	8e-113	335	50S ribosomal protein L15, chloroplastic [Fragaria vesca subsp. vesca]
TRINITY_DN259997_c0_g1	TRINITY_DN259997_c0_g1_i1	FvH4_6g09150.1	100	9e-136	389	50S ribosomal protein L17, chloroplastic [Fragaria vesca subsp. vesca]
TRINITY_DN15283_c0_g1	TRINITY_DN15283_c0_g1_i1	FvH4_4g21870.1	100	1e-114	332	50S ribosomal protein L18, chloroplastic [Fragaria vesca subsp. vesca]
TRINITY_DN5719_c0_g1	TRINITY_DN5719_c0_g1_i1	FvH4_5g20190.1	100	3e-135	391	50S ribosomal protein L19, chloroplastic [Fragaria vesca subsp. vesca]
TRINITY_DN810_c0_g1	TRINITY_DN810_c0_g1_i3	FvH4_5g06380.1	100	7e-178	500	50S ribosomal protein L19, chloroplastic-like [Fragaria vesca subsp. vesca]
TRINITY_DN2462_c0_g2	TRINITY_DN2462_c0_g2_i2	FvH4_3g14110.1	100	4e-84	258	50S ribosomal protein L20, chloroplastic [Fragaria vesca subsp. vesca]<>50S ribosomal protein L20, chloroplastic [Fragaria vesca subsp. vesca]
TRINITY_DN16503_c0_g2	TRINITY_DN16503_c0_g2_i1	FvH4_3g09190.1	100	6e-129	376	50S ribosomal protein L21, mitochondrial [Fragaria vesca subsp. vesca]
TRINITY_DN17097_c0_g1	TRINITY_DN17097_c0_g1_i3	FvH4_3g21600.1	100	4e-83	219	50S ribosomal protein L24, chloroplastic [Fragaria vesca subsp. vesca]
TRINITY_DN21988_c0_g1	TRINITY_DN21988_c0_g1_i2	FvH4_6g53590.1	100	2e-119	370	50S ribosomal protein L27, chloroplastic [Fragaria vesca subsp. vesca]
TRINITY_DN7262_c0_g1	TRINITY_DN7262_c0_g1_i1	FvH4_4g04200.1	100	3e-83	253	50S ribosomal protein L28, chloroplastic [Fragaria vesca subsp. vesca]
TRINITY_DN28049_c0_g2	TRINITY_DN28049_c0_g2_i1	FvH4_1g20710.1	100	1e-96	291	50S ribosomal protein L29, chloroplastic [Fragaria vesca subsp. vesca]
TRINITY_DN19560_c0_g2	TRINITY_DN19560_c0_g2_i2	FvH4_4g09690.1	100	1e-91	275	50S ribosomal protein L35, chloroplastic [Fragaria vesca subsp. vesca]
TRINITY_DN22220_c0_g3	TRINITY_DN22220_c0_g3_i1	FvH4_7g15110.1	100	8e-161	452	50S ribosomal protein L5, chloroplastic [Fragaria vesca subsp. vesca]
TRINITY_DN3221_c0_g2	TRINITY_DN3221_c0_g2_i1	FvH4_6g43280.1	100	2e-156	441	50S ribosomal protein L6, chloroplastic [Fragaria vesca subsp. vesca]
TRINITY_DN9167_c0_g1	TRINITY_DN9167_c0_g1_i1	FvH4_3g30600.1	100	9e-72	229	50S ribosomal protein L9, chloroplastic [Fragaria vesca subsp. vesca]
TRINITY_DN7435_c1_g1	TRINITY_DN7435_c1_g1_i6	FvH4_2g38700.1	100	0	1942	5'-3' exoribonuclease 3 isoform X1 [Fragaria vesca subsp. vesca]
TRINITY_DN10324_c0_g2	TRINITY_DN10324_c0_g2_i1	FvH4_7g18720.1	100	0	1877	5'-3' exoribonuclease 3-like isoform X1 [Fragaria vesca subsp. vesca]
TRINITY_DN24701_c0_g3	TRINITY_DN24701_c0_g3_i1	FvH4_3g30590.1	100	9e-143	413	54S ribosomal protein L10, mitochondrial [Fragaria vesca subsp. vesca]
TRINITY_DN20111_c0_g1	TRINITY_DN20111_c0_g1_i3	FvH4_2g13270.1	100	3e-166	484	5-formyltetrahydrofolate cyclo-ligase-like protein COG0212 isoform X2 [Fragaria vesca subsp. vesca]
TRINITY_DN18066_c0_g1	TRINITY_DN18066_c0_g1_i1	FvH4_1g05060.1	100	4e-72	220	5-methyltetrahydropteroyltriglutamate--homocysteine methyltransferase
TRINITY_DN3067_c0_g2	TRINITY_DN3067_c0_g2_i3	FvH4_7g07120.1	100	0	2524	5-oxoprolinase [Fragaria vesca subsp. vesca]
TRINITY_DN10789_c0_g1	TRINITY_DN10789_c0_g1_i1	FvH4_3g39820.1	100	4e-71	223	6,7-dimethyl-8-ribityllumazine synthase
TRINITY_DN1753_c0_g1	TRINITY_DN1753_c0_g1_i8	FvH4_2g10600.1	100	1e-143	425	6,7-dimethyl-8-ribityllumazine synthase, chloroplastic-like [Fragaria vesca subsp. vesca]
TRINITY_DN32210_c0_g1	TRINITY_DN32210_c0_g1_i1	FvH4_2g23750.1	100	1e-23	93.6	6.7 kDa chloroplast outer envelope membrane protein [Fragaria vesca subsp. vesca]
TRINITY_DN333391_c0_g1	TRINITY_DN333391_c0_g1_i1	FvH4_3g19540.1	100	3e-44	147	60S acidic ribosomal protein P1-like [Fragaria vesca subsp. vesca]
TRINITY_DN822_c0_g1	TRINITY_DN822_c0_g1_i2	FvH4_3g19900.1	100	1e-35	123	60S acidic ribosomal protein P2B-like [Fragaria vesca subsp. vesca]
TRINITY_DN822_c1_g1	TRINITY_DN822_c1_g1_i1	FvH4_3g01910.1	100	1e-35	124	60S acidic ribosomal protein P2-like [Fragaria vesca subsp. vesca]
TRINITY_DN10241_c0_g1	TRINITY_DN10241_c0_g1_i1	FvH4_4g07630.1	100	8e-28	110	60S acidic ribosomal protein P3 [Fragaria vesca subsp. vesca]
TRINITY_DN1029_c0_g3	TRINITY_DN1029_c0_g3_i3	FvH4_3g24900.1	100	9e-138	401	60S ribosomal protein L10a-1 [Fragaria vesca subsp. vesca]
TRINITY_DN1627_c0_g1	TRINITY_DN1627_c0_g1_i1	FvH4_3g32230.1	100	7e-108	330	60S ribosomal protein L12 [Fragaria vesca subsp. vesca]
TRINITY_DN795_c0_g1	TRINITY_DN795_c0_g1_i7	FvH4_7g33460.1	100	9e-126	394	60S ribosomal protein L13-2-like [Rosa chinensis]<>putative ribosomal protein L13e [Rosa chinensis]
TRINITY_DN795_c0_g2	TRINITY_DN795_c0_g2_i2	FvH4_1g22670.1	100	3e-43	151	60S ribosomal protein L13-2-like [Rosa chinensis]<>putative ribosomal protein L13e [Rosa chinensis]
TRINITY_DN1461_c0_g1	TRINITY_DN1461_c0_g1_i5	FvH4_1g23310.1	100	2e-96	302	60S ribosomal protein L13a-4-like isoform X2 [Cucurbita moschata]
TRINITY_DN1110_c1_g2	TRINITY_DN1110_c1_g2_i1	FvH4_2g25920.1	100	2e-131	381	60S ribosomal protein L18-2 [Fragaria vesca subsp. vesca]
TRINITY_DN15389_c0_g2	TRINITY_DN15389_c0_g2_i1	FvH4_4g18800.1	100	1e-101	305	60S ribosomal protein L19-1-like [Fragaria vesca subsp. vesca]
TRINITY_DN19022_c0_g1	TRINITY_DN19022_c0_g1_i1	FvH4_3g23010.1	100	1e-96	288	60S ribosomal protein L2, mitochondrial [Fragaria vesca subsp. vesca]
TRINITY_DN2740_c0_g2	TRINITY_DN2740_c0_g2_i1	FvH4_2g25750.1	100	7e-62	198	60S ribosomal protein L22-2 [Fragaria vesca subsp. vesca]
TRINITY_DN7148_c0_g1	TRINITY_DN7148_c0_g1_i2	FvH4_3g34890.1	100	1e-72	225	60S ribosomal protein L23a-2-like [Fragaria vesca subsp. vesca]
TRINITY_DN5067_c0_g1	TRINITY_DN5067_c0_g1_i3	FvH4_6g17440.1	100	6e-78	241	60S ribosomal protein L24 [Fragaria vesca subsp. vesca]
TRINITY_DN1939_c0_g2	TRINITY_DN1939_c0_g2_i3	FvH4_6g36980.1	100	2e-61	203	60S ribosomal protein L26-1-like [Fragaria vesca subsp. vesca]
TRINITY_DN6930_c0_g1	TRINITY_DN6930_c0_g1_i2	FvH4_2g18030.1	100	1e-80	245	60S ribosomal protein L32-1 [Fragaria vesca subsp. vesca]
TRINITY_DN7058_c0_g3	TRINITY_DN7058_c0_g3_i3	FvH4_4g31370.1	100	3e-61	195	60S ribosomal protein L34-1 [Fragaria vesca subsp. vesca]
TRINITY_DN4613_c0_g1	TRINITY_DN4613_c0_g1_i1	FvH4_7g23810.1	100	2e-70	229	60S ribosomal protein L35a-3 [Fragaria vesca subsp. vesca]
TRINITY_DN8921_c0_g1	TRINITY_DN8921_c0_g1_i3	FvH4_6g31490.1	100	2e-50	171	60S ribosomal protein L37-3 [Fragaria vesca subsp. vesca]<>60S ribosomal protein L37-3 [Rosa chinensis]<>putative ribosomal protein L37e [Rosa chinensis]
TRINITY_DN34623_c0_g1	TRINITY_DN34623_c0_g1_i1	FvH4_5g33510.1	100	8e-32	111	60S ribosomal protein L37a-like [Fragaria vesca subsp. vesca]
TRINITY_DN19330_c0_g1	TRINITY_DN19330_c0_g1_i1	FvH4_2g40780.1	100	3e-17	78.2	60S ribosomal protein L39-2, partial [Fragaria vesca subsp. vesca]
TRINITY_DN525_c0_g1	TRINITY_DN525_c0_g1_i3	FvH4_3g06480.1	100	5e-55	179	60S ribosomal protein L44-like [Gossypium hirsutum]
TRINITY_DN12274_c0_g2	TRINITY_DN12274_c0_g2_i2	FvH4_1g00510.1	100	0	560	60S ribosomal protein L5 [Fragaria vesca subsp. vesca]
TRINITY_DN30657_c0_g1	TRINITY_DN30657_c0_g1_i1	FvH4_5g10230.1	100	4e-137	397	60S ribosomal protein L9-1-like [Fragaria vesca subsp. vesca]
TRINITY_DN10026_c0_g1	TRINITY_DN10026_c0_g1_i2	FvH4_3g23560.1	100	0	1145	65-kDa microtubule-associated protein 1 [Fragaria vesca subsp. vesca]
TRINITY_DN11204_c0_g1	TRINITY_DN11204_c0_g1_i1	FvH4_6g18530.1	100	2e-52	166	65-kDa microtubule-associated protein 5-like [Fragaria vesca subsp. vesca]
TRINITY_DN200_c0_g14	TRINITY_DN200_c0_g1_i14	FvH4_4g26120.1	100	0	1047	65-kDa microtubule-associated protein 6 [Fragaria vesca subsp. vesca]
TRINITY_DN18647_c0_g2	TRINITY_DN18647_c0_g2_i2	FvH4_3g39080.1	100	0	1477	6-phosphofructo-2-kinase/fructose-2,6-bisphosphatase [Fragaria vesca subsp. vesca]
TRINITY_DN9576_c0_g2	TRINITY_DN9576_c0_g2_i1	FvH4_4g04820.1	100	0	983	6-phosphogluconate dehydrogenase, decarboxylating 2, chloroplastic [Fragaria vesca subsp. vesca]
TRINITY_DN2138_c0_g1	TRINITY_DN2138_c0_g1_i1	FvH4_6g45960.1	100	0	974	6-phosphogluconate dehydrogenase, decarboxylating 3 [Fragaria vesca subsp. vesca]
TRINITY_DN7221_c0_g1	TRINITY_DN7221_c0_g1_i4	FvH4_6g37020.1	100	0	788	7-dehydrocholesterol reductase [Fragaria vesca subsp. vesca]
TRINITY_DN14894_c0_g1	TRINITY_DN14894_c0_g1_i2	FvH4_6g12520.1	100	0	985	7-deoxyloganetic acid glucosyltransferase-like [Fragaria vesca subsp. vesca]
TRINITY_DN24682_c0_g1	TRINITY_DN24682_c0_g1_i1	FvH4_4g35790.1	100	0	1011	7-deoxyloganetin glucosyltransferase-like [Fragaria vesca subsp. vesca]
TRINITY_DN6038_c0_g2	TRINITY_DN6038_c0_g2_i1	FvH4_5g36970.1	100	0	979	7-deoxyloganetin glucosyltransferase-like [Fragaria vesca subsp. vesca]
TRINITY_DN13140_c0_g1	TRINITY_DN13140_c0_g1_i1	FvH4_3g05440.1	100	0	1195	9-cis-epoxycarotenoid dioxygenase NCED1, chloroplastic [Fragaria vesca subsp. vesca]<>9-cis-epoxycarotenoid dioxygenase 1 [Fragaria x ananassa]
TRINITY_DN232142_c0_g1	TRINITY_DN232142_c0_g1_i1	FvH4_3g16730.1	100	0	1189	9-cis-epoxycarotenoid dioxygenase NCED3, chloroplastic-like [Fragaria vesca subsp. vesca]<>9-cis-epoxycarotenoid dioxygenase 2 [Fragaria x ananassa]
TRINITY_DN2439_c0_g1	TRINITY_DN2439_c0_g1_i1	FvH4_7g18530.1	100	0	1273	AAA+ ATPase domain containing protein
TRINITY_DN6792_c0_g1	TRINITY_DN6792_c0_g1_i3	FvH4_1g26110.1	100	0	653	aarF domain-containing protein kinase 4 [Fragaria vesca subsp. vesca]
TRINITY_DN37054_c0_g1	TRINITY_DN37054_c0_g1_i3	FvH4_5g17020.1	100	0	1531	ABC transporter A family member 8-like [Fragaria vesca subsp. vesca]
TRINITY_DN9900_c0_g1	TRINITY_DN9900_c0_g1_i4	FvH4_6g16450.1	100	0	1635	ABC transporter B family member 1 [Prunus avium]
TRINITY_DN79299_c0_g1	TRINITY_DN79299_c0_g1_i1	FvH4_1g26280.1	100	0	2362	ABC transporter B family member 11-like [Fragaria vesca subsp. vesca]<>ABC transporter B family member 11-like [Fragaria vesca subsp. vesca]<>ABC transporter B family member 11-like [Fragaria vesca subsp. vesca]
TRINITY_DN1583_c0_g1	TRINITY_DN1583_c0_g1_i4	FvH4_6g49760.1	100	0	1493	ABC transporter B family member 15-like [Fragaria vesca subsp. vesca]
TRINITY_DN7215_c0_g1	TRINITY_DN7215_c0_g1_i1	FvH4_7g21390.1	100	0	2651	ABC transporter B family member 20-like [Fragaria vesca subsp. vesca]
TRINITY_DN8733_c0_g1	TRINITY_DN8733_c0_g1_i6	FvH4_6g19080.1	100	0	901	ABC transporter B family member 29, chloroplastic isoform X1 [Fragaria vesca subsp. vesca]
TRINITY_DN46501_c0_g1	TRINITY_DN46501_c0_g1_i1	FvH4_6g36100.1	100	2e-20	65.5	ABC transporter C family member 8-like [Fragaria vesca subsp. vesca]
TRINITY_DN468_c0_g2	TRINITY_DN468_c0_g2_i2	FvH4_1g25840.1	100	0	2587	ABC transporter D family member 1 [Fragaria vesca subsp. vesca]
TRINITY_DN5134_c0_g1	TRINITY_DN5134_c0_g1_i7	FvH4_6g37180.1	100	0	1322	ABC transporter F family member 4 [Fragaria vesca subsp. vesca]
TRINITY_DN8836_c0_g1	TRINITY_DN8836_c0_g1_i1	FvH4_6g06950.1	100	0	1428	ABC transporter G family member 11 [Fragaria vesca subsp. vesca]
TRINITY_DN21_c0_g3	TRINITY_DN21_c0_g3_i1	FvH4_1g20390.1	100	0	1370	ABC transporter G family member 11-like [Fragaria vesca subsp. vesca]
TRINITY_DN24777_c0_g2	TRINITY_DN24777_c0_g2_i2	FvH4_6g24260.1	100	0	1121	ABC transporter G family member 15-like isoform X2 [Fragaria vesca subsp. vesca]
TRINITY_DN262308_c0_g1	TRINITY_DN262308_c0_g1_i1	FvH4_5g29080.1	100	0	875	ABC transporter G family member 17-like [Fragaria vesca subsp. vesca]
TRINITY_DN10018_c0_g1	TRINITY_DN10018_c0_g1_i1	FvH4_4g28360.1	100	0	1325	ABC transporter G family member 21 [Fragaria vesca subsp. vesca]
TRINITY_DN5170_c0_g1	TRINITY_DN5170_c0_g1_i2	FvH4_5g29200.1	100	0	1153	ABC transporter G family member 23 [Fragaria vesca subsp. vesca]
TRINITY_DN30655_c0_g1	TRINITY_DN30655_c0_g1_i1	FvH4_2g03830.1	100	0	1063	ABC transporter G family member 4-like [Fragaria vesca subsp. vesca]
TRINITY_DN6254_c0_g1	TRINITY_DN6254_c0_g1_i2	FvH4_7g20800.1	100	0	1425	ABC transporter G family member 6-like [Fragaria vesca subsp. vesca]
TRINITY_DN1456_c1_g1	TRINITY_DN1456_c1_g1_i1	FvH4_1g01200.1	100	1e-145	437	ABC transporter I family member 1 [Fragaria vesca subsp. vesca]<>ABC transporter I family member 1 [Fragaria vesca subsp. vesca]<>ABC transporter I family member 1 [Fragaria vesca subsp. vesca]<>ABC transporter I family member 1 [Fragaria vesca subsp. vesca]
TRINITY_DN12975_c0_g1	TRINITY_DN12975_c0_g1_i5	FvH4_2g21190.1	100	1e-146	322	ABC transporter I family member 19-like isoform X1 [Rosa chinensis]<>putative peptide-transporting ATPase [Rosa chinensis]
TRINITY_DN2178_c0_g1	TRINITY_DN2178_c0_g1_i3	FvH4_6g08040.1	100	0	586	ABC transporter I family member 20 [Fragaria vesca subsp. vesca]
TRINITY_DN25449_c0_g1	TRINITY_DN25449_c0_g1_i1	FvH4_5g18610.1	100	0	968	abietadienol/abietadienal oxidase [Fragaria vesca subsp. vesca]
TRINITY_DN260230_c0_g1	TRINITY_DN260230_c0_g1_i1	FvH4_2g05700.1	100	0	1041	abscisate beta-glucosyltransferase-like [Fragaria vesca subsp. vesca]
TRINITY_DN10644_c0_g1	TRINITY_DN10644_c0_g1_i3	FvH4_2g06010.1	100	0	765	abscisic acid 8'-hydroxylase 4 [Fragaria vesca subsp. vesca]
TRINITY_DN68193_c0_g1	TRINITY_DN68193_c0_g1_i1	FvH4_3g07720.1	100	7e-121	360	abscisic acid receptor PYL11-like [Fragaria vesca subsp. vesca]
TRINITY_DN12368_c0_g1	TRINITY_DN12368_c0_g1_i1	FvH4_3g07710.1	100	2e-120	360	abscisic acid receptor PYL12-like [Fragaria vesca subsp. vesca]
TRINITY_DN29822_c0_g1	TRINITY_DN29822_c0_g1_i1	FvH4_2g32040.1	100	3e-138	394	abscisic acid receptor PYL2 [Fragaria vesca subsp. vesca]
TRINITY_DN15480_c0_g1	TRINITY_DN15480_c0_g1_i1	FvH4_6g10740.1	100	8e-134	392	abscisic acid receptor PYL4 [Fragaria vesca subsp. vesca]
TRINITY_DN2530_c0_g1	TRINITY_DN2530_c0_g1_i3	FvH4_7g25180.1	100	2e-130	384	abscisic acid receptor PYL4 [Fragaria vesca subsp. vesca]
TRINITY_DN3923_c5_g1	TRINITY_DN3923_c5_g1_i3	FvH4_5g22060.1	100	3e-144	430	abscisic acid receptor PYR1-like isoform X2 [Fragaria vesca subsp. vesca]
TRINITY_DN58184_c0_g1	TRINITY_DN58184_c0_g1_i1	FvH4_5g38360.1	100	2e-44	149	ABSCISIC ACID-INSENSITIVE 5-like protein 3 [Fragaria vesca subsp. vesca]
TRINITY_DN11250_c0_g1	TRINITY_DN11250_c0_g1_i1	FvH4_2g13410.1	100	1e-38	140	abscisic stress-ripening protein 2
TRINITY_DN9583_c0_g1	TRINITY_DN9583_c0_g1_i1	FvH4_3g26980.1	100	0	2412	abscisic-aldehyde oxidase [Fragaria vesca subsp. vesca]
TRINITY_DN20383_c0_g1	TRINITY_DN20383_c0_g1_i1	FvH4_2g19680.1	100	5e-17	79.7	acanthoscurrin-2-like [Fragaria vesca subsp. vesca]
TRINITY_DN4126_c0_g1	TRINITY_DN4126_c0_g1_i4	FvH4_4g19360.1	100	0	618	acetate/butyrate--CoA ligase AAE7, peroxisomal [Fragaria vesca subsp. vesca]
TRINITY_DN8146_c0_g1	TRINITY_DN8146_c0_g1_i1	FvH4_7g06770.1	100	0	1196	acetolactate synthase 2, chloroplastic [Fragaria vesca subsp. vesca]
TRINITY_DN3294_c0_g2	TRINITY_DN3294_c0_g2_i1	FvH4_2g30500.1	100	0	608	acetylglutamate kinase, chloroplastic [Fragaria vesca subsp. vesca]
TRINITY_DN20881_c0_g1	TRINITY_DN20881_c0_g1_i1	FvH4_6g29020.1	100	0	928	acetylornithine aminotransferase, mitochondrial [Fragaria vesca subsp. vesca]
TRINITY_DN16989_c0_g1	TRINITY_DN16989_c0_g1_i2	FvH4_5g21890.1	100	0	866	acetylornithine deacetylase [Fragaria vesca subsp. vesca]
TRINITY_DN14545_c0_g1	TRINITY_DN14545_c0_g1_i1	FvH4_7g27010.1	100	0	512	acid phosphatase 1 [Fragaria vesca subsp. vesca]
TRINITY_DN251_c0_g2	TRINITY_DN251_c0_g2_i1	FvH4_6g09510.1	100	0	538	acid phosphatase 1 [Fragaria vesca subsp. vesca]<>acid phosphatase 1 [Fragaria vesca subsp. vesca]<>acid phosphatase 1 [Fragaria vesca subsp. vesca]
TRINITY_DN12032_c0_g1	TRINITY_DN12032_c0_g1_i1	FvH4_6g32560.1	100	0	572	acid phosphatase 1-like [Fragaria vesca subsp. vesca]
TRINITY_DN325906_c0_g1	TRINITY_DN325906_c0_g1_i1	FvH4_2g18490.1	100	0	909	acidic leucine-rich nuclear phosphoprotein 32 family B protein
TRINITY_DN7446_c0_g1	TRINITY_DN7446_c0_g1_i1	FvH4_2g40880.1	100	0	738	acidic mammalian chitinase-like
TRINITY_DN4416_c0_g1	TRINITY_DN4416_c0_g1_i2	FvH4_1g18070.1	100	0	936	ACT domain-containing protein ACR1 [Fragaria vesca subsp. vesca]<>ACT domain-containing protein ACR1 [Fragaria vesca subsp. vesca]
TRINITY_DN5198_c0_g1	TRINITY_DN5198_c0_g1_i1	FvH4_7g18540.1	100	0	587	ACT domain-containing protein ACR10-like [Fragaria vesca subsp. vesca]
TRINITY_DN2224_c0_g1	TRINITY_DN2224_c0_g1_i2	FvH4_6g27920.1	100	7e-156	453	ACT domain-containing protein ACR11 [Fragaria vesca subsp. vesca]
TRINITY_DN29558_c0_g1	TRINITY_DN29558_c0_g1_i1	FvH4_2g28840.1	100	0	1016	ACT domain-containing protein ACR2 [Fragaria vesca subsp. vesca]<>ACT domain-containing protein ACR2 [Fragaria vesca subsp. vesca]
TRINITY_DN4416_c0_g2	TRINITY_DN4416_c0_g2_i3	FvH4_2g15200.1	100	0	698	ACT domain-containing protein ACR3 [Fragaria vesca subsp. vesca]<>ACT domain-containing protein ACR3 [Fragaria vesca subsp. vesca]
TRINITY_DN6408_c0_g1	TRINITY_DN6408_c0_g1_i1	FvH4_4g29340.1	100	0	697	ACT domain-containing protein ACR4 [Fragaria vesca subsp. vesca]
TRINITY_DN5738_c0_g1	TRINITY_DN5738_c0_g1_i1	FvH4_6g53840.1	100	0	884	ACT domain-containing protein ACR6 [Fragaria vesca subsp. vesca]
TRINITY_DN353_c1_g2	TRINITY_DN353_c1_g2_i2	FvH4_5g00870.1	100	0	671	ACT domain-containing protein ACR8-like [Fragaria vesca subsp. vesca]
TRINITY_DN5644_c0_g1	TRINITY_DN5644_c0_g1_i5	FvH4_2g16960.1	100	6e-28	108	actin cytoskeleton-regulatory complex protein pan1-like
TRINITY_DN2425_c0_g2	TRINITY_DN2425_c0_g2_i1	FvH4_3g35960.1	100	0	784	actin-1 [Fragaria vesca subsp. vesca]<>actin-1 [Rosa chinensis]<>actin-1 [Rosa chinensis]<>actin-1 [Rosa chinensis]<>putative Actin family [Rosa chinensis]
TRINITY_DN1214_c0_g1	TRINITY_DN1214_c0_g1_i5	FvH4_5g10190.1	100	0	782	actin-7-like [Fragaria vesca subsp. vesca]<>actin-7-like [Fragaria vesca subsp. vesca]<>actin-7-like [Fragaria vesca subsp. vesca]<>actin-7-like [Fragaria vesca subsp. vesca]<>actin-7-like [Fragaria vesca subsp. vesca]<>actin [Fragaria x ananassa]
TRINITY_DN3279_c0_g1	TRINITY_DN3279_c0_g1_i4	FvH4_3g35350.1	100	4e-84	268	actin-depolymerizing factor 2 [Fragaria vesca subsp. vesca]
TRINITY_DN7929_c3_g1	TRINITY_DN7929_c3_g1_i1	FvH4_6g14260.1	100	3e-89	285	actin-depolymerizing factor 3-like [Fragaria vesca subsp. vesca]
TRINITY_DN3692_c0_g1	TRINITY_DN3692_c0_g1_i3	FvH4_2g01430.1	100	2e-63	208	actin-depolymerizing factor 5 [Fragaria vesca subsp. vesca]
TRINITY_DN7774_c0_g1	TRINITY_DN7774_c0_g1_i9	FvH4_3g13510.1	100	3e-117	259	actin-related protein 2/3 complex subunit 2A isoform X1 [Fragaria vesca subsp. vesca]
TRINITY_DN23958_c0_g1	TRINITY_DN23958_c0_g1_i3	FvH4_4g04380.1	100	1e-87	288	actin-related protein 2/3 complex subunit 2B isoform X1 [Fragaria vesca subsp. vesca]
TRINITY_DN5290_c0_g1	TRINITY_DN5290_c0_g1_i2	FvH4_3g33280.1	100	2e-66	217	actin-related protein 2/3 complex subunit 3 [Fragaria vesca subsp. vesca]
TRINITY_DN7076_c1_g1	TRINITY_DN7076_c1_g1_i2	FvH4_7g09830.1	100	3e-54	179	actin-related protein 2/3 complex subunit 5A [Fragaria vesca subsp. vesca]<>actin-related protein 2/3 complex subunit 5A [Rosa chinensis]<>hypothetical protein RchiOBHm_Chr1g0346991 [Rosa chinensis]
TRINITY_DN4319_c0_g1	TRINITY_DN4319_c0_g1_i4	FvH4_4g25180.1	100	0	676	actin-related protein 3 [Fragaria vesca subsp. vesca]
TRINITY_DN6162_c0_g1	TRINITY_DN6162_c0_g1_i3	FvH4_1g02800.1	100	0	858	actin-related protein 6 [Fragaria vesca subsp. vesca]
TRINITY_DN2486_c0_g2	TRINITY_DN2486_c0_g2_i1	FvH4_7g01150.1	100	0	748	actin-related protein 7 isoform X1 [Fragaria vesca subsp. vesca]
TRINITY_DN1603_c0_g1	TRINITY_DN1603_c0_g1_i2	FvH4_5g15050.1	100	2e-164	483	activating signal cointegrator 1 [Fragaria vesca subsp. vesca]
TRINITY_DN302681_c0_g1	TRINITY_DN302681_c0_g1_i1	FvH4_7g04450.1	100	1e-104	301	acyl carrier protein 1, chloroplastic-like [Rosa chinensis]<>putative Acyl carrier protein (ACP) [Rosa chinensis]
TRINITY_DN11403_c0_g2	TRINITY_DN11403_c0_g2_i1	FvH4_7g08760.1	100	6e-85	260	acyl carrier protein 1, mitochondrial [Fragaria vesca subsp. vesca]
TRINITY_DN2499_c0_g1	TRINITY_DN2499_c0_g1_i3	FvH4_3g00380.1	100	1e-64	214	acyl carrier protein 3, mitochondrial [Fragaria vesca subsp. vesca]<>acyl carrier protein 3, mitochondrial [Fragaria vesca subsp. vesca]
TRINITY_DN8574_c0_g1	TRINITY_DN8574_c0_g1_i2	FvH4_4g10110.1	100	0	945	acyl-[acyl-carrier-protein] desaturase, chloroplastic [Fragaria vesca subsp. vesca]
TRINITY_DN8442_c0_g1	TRINITY_DN8442_c0_g1_i1	FvH4_7g32090.1	100	2e-153	456	acyl-CoA-binding domain-containing protein 1-like [Fragaria vesca subsp. vesca]
TRINITY_DN13888_c0_g2	TRINITY_DN13888_c0_g2_i3	FvH4_2g33320.1	100	2e-102	324	acyl-CoA-binding domain-containing protein 3-like [Fragaria vesca subsp. vesca]<>acyl-CoA-binding domain-containing protein 3-like [Fragaria vesca subsp. vesca]
TRINITY_DN13135_c0_g1	TRINITY_DN13135_c0_g1_i1	FvH4_4g17510.1	100	0	1357	acyl-CoA-binding domain-containing protein 4 [Fragaria vesca subsp. vesca]
TRINITY_DN80172_c0_g1	TRINITY_DN80172_c0_g1_i3	FvH4_7g06590.1	100	0	735	acyl-CoA-binding domain-containing protein 4 [Fragaria vesca subsp. vesca]<>acyl-CoA-binding domain-containing protein 4 [Fragaria vesca subsp. vesca]
TRINITY_DN7794_c0_g2	TRINITY_DN7794_c0_g2_i2	FvH4_5g24090.1	100	1e-45	155	acyl-CoA-binding protein [Fragaria vesca subsp. vesca]
TRINITY_DN200610_c0_g1	TRINITY_DN200610_c0_g1_i1	FvH4_1g08340.1	100	3e-68	210	acyl-CoA-binding protein-like isoform X2 [Fragaria vesca subsp. vesca]
TRINITY_DN5652_c0_g1	TRINITY_DN5652_c0_g1_i1	FvH4_3g01000.1	100	0	684	acyl-CoA--sterol O-acyltransferase 1-like [Fragaria vesca subsp. vesca]
TRINITY_DN10845_c0_g1	TRINITY_DN10845_c0_g1_i4	FvH4_1g21250.1	100	0	1011	acyl-coenzyme A oxidase 2, peroxisomal [Fragaria vesca subsp. vesca]
TRINITY_DN578_c0_g5	TRINITY_DN578_c0_g5_i1	FvH4_6g26900.1	100	0	1412	acyl-coenzyme A oxidase 3, peroxisomal-like isoform X1 [Fragaria vesca subsp. vesca]
TRINITY_DN7109_c0_g11	TRINITY_DN7109_c0_g1_i11	FvH4_3g11670.1	100	5e-107	334	acyl-coenzyme A thioesterase 13 [Fragaria vesca subsp. vesca]
TRINITY_DN17717_c0_g1	TRINITY_DN17717_c0_g1_i3	FvH4_3g37970.1	100	2e-47	157	acyl-coenzyme A thioesterase 13-like isoform X1
TRINITY_DN15031_c0_g1	TRINITY_DN15031_c0_g1_i2	FvH4_3g38050.1	100	2e-107	325	acyl-coenzyme A thioesterase 13-like isoform X1 [Fragaria vesca subsp. vesca]
TRINITY_DN11298_c0_g1	TRINITY_DN11298_c0_g1_i2	FvH4_4g18580.1	100	6e-156	444	acylpyruvase FAHD1, mitochondrial [Fragaria vesca subsp. vesca]
TRINITY_DN11054_c0_g1	TRINITY_DN11054_c0_g1_i1	FvH4_4g24550.1	100	0	912	acylsugar acyltransferase 3-like
TRINITY_DN4186_c0_g1	TRINITY_DN4186_c0_g1_i2	FvH4_4g07890.1	100	0	1144	adagio protein 1 [Fragaria vesca subsp. vesca]
TRINITY_DN4788_c1_g1	TRINITY_DN4788_c1_g1_i1	FvH4_7g25660.1	100	0	1052	adenine/guanine permease AZG1 [Fragaria vesca subsp. vesca]
TRINITY_DN16382_c0_g1	TRINITY_DN16382_c0_g1_i1	FvH4_5g07290.1	100	0	996	adenine/guanine permease AZG2 [Fragaria vesca subsp. vesca]
TRINITY_DN2494_c0_g1	TRINITY_DN2494_c0_g1_i6	FvH4_7g34180.1	100	0	703	adenosine kinase [Fragaria vesca subsp. vesca]
TRINITY_DN18654_c0_g1	TRINITY_DN18654_c0_g1_i1	FvH4_2g23840.1	100	0	673	adenylate isopentenyltransferase 3, chloroplastic [Fragaria vesca subsp. vesca]
TRINITY_DN11389_c0_g1	TRINITY_DN11389_c0_g1_i1	FvH4_4g14440.1	100	0	707	adenylate isopentenyltransferase 5, chloroplastic [Fragaria vesca subsp. vesca]
TRINITY_DN1078_c0_g1	TRINITY_DN1078_c0_g1_i9	FvH4_6g15070.1	100	0	596	adenylate kinase 1, chloroplastic [Fragaria vesca subsp. vesca]
TRINITY_DN1727_c0_g12	TRINITY_DN1727_c0_g1_i12	FvH4_7g07940.1	100	0	954	adenylosuccinate synthetase 2, chloroplastic-like [Rosa chinensis]<>adenylosuccinate synthetase 2, chloroplastic-like [Rosa chinensis]<>putative adenylosuccinate synthase [Rosa chinensis]
TRINITY_DN12036_c0_g1	TRINITY_DN12036_c0_g1_i2	FvH4_2g04460.1	100	0	539	adenylyl-sulfate kinase 3-like [Fragaria vesca subsp. vesca]
TRINITY_DN951_c0_g1	TRINITY_DN951_c0_g1_i5	FvH4_7g22770.1	100	4e-68	222	adoMet-dependent rRNA methyltransferase spb1 [Fragaria vesca subsp. vesca]
TRINITY_DN6885_c0_g3	TRINITY_DN6885_c0_g3_i4	FvH4_6g30640.1	100	0	704	ADP,ATP carrier protein 1, chloroplastic [Fragaria vesca subsp. vesca]
TRINITY_DN166_c0_g1	TRINITY_DN166_c0_g1_i2	FvH4_4g22780.1	100	0	712	ADP-ribosylation factor GTPase-activating protein AGD3 [Fragaria vesca subsp. vesca]
TRINITY_DN2283_c2_g3	TRINITY_DN2283_c2_g3_i1	FvH4_2g17650.1	100	1e-89	274	adrenodoxin, mitochondrial [Fragaria vesca subsp. vesca]
TRINITY_DN23155_c0_g1	TRINITY_DN23155_c0_g1_i1	FvH4_5g32850.1	100	5e-153	434	agamous-like MADS-box protein AGL12 [Fragaria vesca subsp. vesca]
TRINITY_DN634_c0_g3	TRINITY_DN634_c0_g3_i1	FvH4_5g01240.1	100	2e-148	427	agamous-like MADS-box protein AGL14 isoform X2 [Fragaria vesca subsp. vesca]
TRINITY_DN36242_c0_g1	TRINITY_DN36242_c0_g1_i1	FvH4_5g32190.1	100	3e-84	252	agamous-like MADS-box protein AGL18 [Fragaria vesca subsp. vesca]
TRINITY_DN244281_c0_g1	TRINITY_DN244281_c0_g1_i1	FvH4_5g34740.1	100	3e-43	141	agamous-like MADS-box protein AGL61 [Fragaria vesca subsp. vesca]
TRINITY_DN151864_c0_g1	TRINITY_DN151864_c0_g1_i1	FvH4_4g35860.1	100	3e-170	475	agamous-like MADS-box protein AGL62 [Fragaria vesca subsp. vesca]
TRINITY_DN309194_c0_g1	TRINITY_DN309194_c0_g1_i1	FvH4_6g35690.1	100	1e-123	353	agamous-like MADS-box protein AGL62 [Fragaria vesca subsp. vesca]
TRINITY_DN37753_c0_g1	TRINITY_DN37753_c0_g1_i1	FvH4_2g27630.1	100	5e-139	402	agamous-like MADS-box protein AGL80 [Fragaria vesca subsp. vesca]
TRINITY_DN9364_c0_g1	TRINITY_DN9364_c0_g1_i6	FvH4_6g21170.1	100	7e-130	385	agamous-like MADS-box protein AGL80 [Fragaria vesca subsp. vesca]<>agamous-like MADS-box protein AGL80 [Fragaria vesca subsp. vesca]
TRINITY_DN4664_c0_g5	TRINITY_DN4664_c0_g5_i1	FvH4_4g23530.1	100	7e-171	484	agamous-like MADS-box protein AGL9 homolog isoform X2
TRINITY_DN825_c0_g1	TRINITY_DN825_c0_g1_i8	FvH4_3g10790.1	100	7e-56	192	A-kinase anchor protein 9 [Fragaria vesca subsp. vesca]
TRINITY_DN29480_c0_g1	TRINITY_DN29480_c0_g1_i1	FvH4_4g29530.1	100	1e-16	72.8	alanine and glycine-rich protein-like [Vigna radiata var. radiata]
TRINITY_DN3515_c0_g1	TRINITY_DN3515_c0_g1_i2	FvH4_1g21920.1	100	2e-160	503	alanine--glyoxylate aminotransferase 2 homolog 1, mitochondrial [Fragaria vesca subsp. vesca]
TRINITY_DN12340_c0_g1	TRINITY_DN12340_c0_g1_i1	FvH4_4g17960.1	100	2e-179	530	alanine--tRNA ligase, mitochondrial [Fragaria vesca subsp. vesca]
TRINITY_DN17328_c0_g1	TRINITY_DN17328_c0_g1_i2	FvH4_2g20240.1	100	0	777	alcohol dehydrogenase class-3 [Fragaria vesca subsp. vesca]
TRINITY_DN6602_c0_g1	TRINITY_DN6602_c0_g1_i2	FvH4_7g34200.1	100	0	693	alcohol dehydrogenase-like 1 [Fragaria vesca subsp. vesca]<>alcohol dehydrogenase-like 1 [Fragaria vesca subsp. vesca]
TRINITY_DN26174_c0_g1	TRINITY_DN26174_c0_g1_i1	FvH4_5g10860.1	100	0	1030	aldehyde oxidase GLOX1-like
TRINITY_DN14090_c0_g1	TRINITY_DN14090_c0_g1_i2	FvH4_4g26260.1	100	0	1467	ALG-2 interacting protein X [Fragaria vesca subsp. vesca]
TRINITY_DN18650_c0_g1	TRINITY_DN18650_c0_g1_i1	FvH4_4g20740.1	100	0	1278	alkaline/neutral invertase A, mitochondrial [Fragaria vesca subsp. vesca]
TRINITY_DN33_c1_g1	TRINITY_DN33_c1_g1_i2	FvH4_3g24390.1	100	0	746	alkaline/neutral invertase E, chloroplastic [Fragaria vesca subsp. vesca]
TRINITY_DN10799_c0_g1	TRINITY_DN10799_c0_g1_i2	FvH4_5g24670.1	100	0	680	alkylated DNA repair protein alkB homolog 8 [Fragaria vesca subsp. vesca]
TRINITY_DN3266_c0_g1	TRINITY_DN3266_c0_g1_i4	FvH4_5g38270.1	100	0	823	alkylated DNA repair protein alkB homolog 8 isoform X1 [Fragaria vesca subsp. vesca]<>alkylated DNA repair protein alkB homolog 8 isoform X1 [Fragaria vesca subsp. vesca]<>alkylated DNA repair protein alkB homolog 8 isoform X1 [Fragaria vesca subsp. vesca]
TRINITY_DN5357_c0_g1	TRINITY_DN5357_c0_g1_i3	FvH4_3g12850.1	100	0	794	allantoate deiminase [Fragaria vesca subsp. vesca]
TRINITY_DN9360_c0_g1	TRINITY_DN9360_c0_g1_i1	FvH4_5g31510.1	100	2e-157	456	allene oxide cyclase 3, chloroplastic-like [Fragaria vesca subsp. vesca]
TRINITY_DN3209_c1_g1	TRINITY_DN3209_c1_g1_i4	FvH4_6g45370.1	100	9e-130	379	allene oxide cyclase 4, chloroplastic-like [Fragaria vesca subsp. vesca]
TRINITY_DN10982_c0_g1	TRINITY_DN10982_c0_g1_i1	FvH4_2g07430.1	100	0	923	allene oxide synthase 1, chloroplastic-like [Rosa chinensis]
TRINITY_DN4051_c0_g2	TRINITY_DN4051_c0_g2_i2	FvH4_5g16260.1	100	0	932	allene oxide synthase 3-like [Rosa chinensis]<>putative cytochrome P450 [Rosa chinensis]
TRINITY_DN4051_c0_g1	TRINITY_DN4051_c0_g1_i2	FvH4_2g07410.1	100	0	1001	allene oxide synthase-like [Fragaria vesca subsp. vesca]
TRINITY_DN18532_c0_g2	TRINITY_DN18532_c0_g2_i1	FvH4_6g18830.1	100	8e-174	496	alpha carbonic anhydrase 1, chloroplastic [Fragaria vesca subsp. vesca]
TRINITY_DN33408_c0_g1	TRINITY_DN33408_c0_g1_i1	FvH4_3g31680.1	100	0	540	alpha carbonic anhydrase 7 [Fragaria vesca subsp. vesca]
TRINITY_DN19659_c0_g1	TRINITY_DN19659_c0_g1_i5	FvH4_5g31230.1	100	3e-77	264	alpha-(1,4)-fucosyltransferase [Fragaria vesca subsp. vesca]
TRINITY_DN1057_c0_g2	TRINITY_DN1057_c0_g2_i2	FvH4_5g22550.1	100	0	1786	alpha,alpha-trehalose-phosphate synthase [UDP-forming] 5 [Fragaria vesca subsp. vesca]
TRINITY_DN9980_c0_g1	TRINITY_DN9980_c0_g1_i2	FvH4_4g33380.1	100	0	1717	alpha,alpha-trehalose-phosphate synthase [UDP-forming] 6 [Fragaria vesca subsp. vesca]
TRINITY_DN3814_c0_g1	TRINITY_DN3814_c0_g1_i4	FvH4_6g19320.1	100	4e-100	317	alpha/beta hydrolase domain-containing protein 11 [Fragaria vesca subsp. vesca]
TRINITY_DN20806_c0_g1	TRINITY_DN20806_c0_g1_i1	FvH4_4g29030.1	100	0	729	alpha/beta hydrolase domain-containing protein 17B [Fragaria vesca subsp. vesca]
TRINITY_DN4772_c0_g1	TRINITY_DN4772_c0_g1_i5	FvH4_2g16770.1	100	0	571	alpha-1,3-mannosyl-glycoprotein 2-beta-N-acetylglucosaminyltransferase [Fragaria vesca subsp. vesca]
TRINITY_DN4371_c0_g1	TRINITY_DN4371_c0_g1_i1	FvH4_6g46510.1	100	0	708	alpha-1,4-glucan-protein synthase [UDP-forming] 2 [Fragaria vesca subsp. vesca]
TRINITY_DN6846_c0_g1	TRINITY_DN6846_c0_g1_i1	FvH4_6g40640.1	100	0	909	alpha-1,6-mannosyl-glycoprotein 2-beta-N-acetylglucosaminyltransferase [Fragaria vesca subsp. vesca]
TRINITY_DN21532_c0_g1	TRINITY_DN21532_c0_g1_i2	FvH4_4g31910.1	100	0	1731	alpha-amylase 3, chloroplastic isoform X1 [Fragaria vesca subsp. vesca]
TRINITY_DN224_c0_g1	TRINITY_DN224_c0_g1_i1	FvH4_3g17500.1	100	5e-149	422	alpha-amylase/subtilisin inhibitor-like [Fragaria vesca subsp. vesca]
TRINITY_DN3418_c1_g1	TRINITY_DN3418_c1_g1_i5	FvH4_1g29140.1	100	0	934	alpha-L-arabinofuranosidase 1 [Fragaria vesca subsp. vesca]
TRINITY_DN20676_c0_g2	TRINITY_DN20676_c0_g2_i1	FvH4_3g30940.1	100	0	1025	alpha-L-fucosidase 1 [Fragaria vesca subsp. vesca]
TRINITY_DN1927_c3_g1	TRINITY_DN1927_c3_g1_i1	FvH4_7g28480.1	100	0	959	alpha-L-fucosidase 1-like [Fragaria vesca subsp. vesca]
TRINITY_DN4105_c0_g1	TRINITY_DN4105_c0_g1_i2	FvH4_6g54280.1	100	0	1529	alpha-mannosidase [Fragaria vesca subsp. vesca]
TRINITY_DN241233_c0_g1	TRINITY_DN241233_c0_g1_i1	FvH4_1g01080.1	100	1e-107	316	alpha-soluble NSF attachment protein 2-like [Fragaria vesca subsp. vesca]
TRINITY_DN312_c0_g10	TRINITY_DN312_c0_g1_i10	FvH4_4g27500.1	100	0	1781	alpha-xylosidase 1 [Fragaria vesca subsp. vesca]
TRINITY_DN10463_c0_g1	TRINITY_DN10463_c0_g1_i1	FvH4_7g09080.1	100	0	655	alsin homolog [Rosa chinensis]<>putative 1-phosphatidylinositol-4-phosphate 5-kinase [Rosa chinensis]
TRINITY_DN24043_c0_g1	TRINITY_DN24043_c0_g1_i1	FvH4_5g00410.1	100	0	1021	alternative NAD(P)H-ubiquinone oxidoreductase C1, chloroplastic/mitochondrial [Fragaria vesca subsp. vesca]
TRINITY_DN98392_c0_g2	TRINITY_DN98392_c0_g2_i1	FvH4_4g05930.1	100	0	569	alternative oxidase 3, mitochondrial-like [Fragaria vesca subsp. vesca]
TRINITY_DN4842_c0_g3	TRINITY_DN4842_c0_g3_i1	FvH4_2g23710.1	100	0	656	aluminum-activated malate transporter 13-like [Fragaria vesca subsp. vesca]
TRINITY_DN55691_c0_g1	TRINITY_DN55691_c0_g1_i1	FvH4_3g26530.1	100	0	905	aluminum-activated malate transporter 2-like [Fragaria vesca subsp. vesca]
TRINITY_DN20548_c0_g1	TRINITY_DN20548_c0_g1_i1	FvH4_6g20330.1	100	0	919	aluminum-activated malate transporter 8 [Fragaria vesca subsp. vesca]
TRINITY_DN2710_c0_g1	TRINITY_DN2710_c0_g1_i3	FvH4_5g03620.1	100	0	1018	aluminum-activated malate transporter 9-like [Fragaria vesca subsp. vesca]
TRINITY_DN37680_c0_g1	TRINITY_DN37680_c0_g1_i1	FvH4_4g27680.1	100	0	1040	aluminum-activated malate transporter 9-like [Fragaria vesca subsp. vesca]
TRINITY_DN3117_c0_g1	TRINITY_DN3117_c0_g1_i1	FvH4_6g05640.1	100	0	855	amidase 1 [Fragaria vesca subsp. vesca]
TRINITY_DN5298_c0_g2	TRINITY_DN5298_c0_g2_i2	FvH4_1g24970.1	100	0	1061	amino-acid permease BAT1 homolog [Fragaria vesca subsp. vesca]
TRINITY_DN5444_c0_g1	TRINITY_DN5444_c0_g1_i4	FvH4_3g01820.1	100	0	839	aminomethyltransferase, mitochondrial [Fragaria vesca subsp. vesca]
TRINITY_DN1344_c1_g1	TRINITY_DN1344_c1_g1_i1	FvH4_6g01460.1	100	0	925	ammonium transporter 1 member 2 [Fragaria vesca subsp. vesca]
TRINITY_DN12293_c0_g1	TRINITY_DN12293_c0_g1_i1	FvH4_6g11040.1	100	0	925	ammonium transporter 2 [Fragaria vesca subsp. vesca]
TRINITY_DN12293_c0_g2	TRINITY_DN12293_c0_g2_i1	FvH4_1g25720.1	100	0	932	ammonium transporter 3 member 1-like [Fragaria vesca subsp. vesca]
TRINITY_DN2541_c1_g1	TRINITY_DN2541_c1_g1_i1	FvH4_2g29590.1	100	0	866	ammonium transporter 3 member 1-like [Fragaria vesca subsp. vesca]
TRINITY_DN1967_c0_g1	TRINITY_DN1967_c0_g1_i2	FvH4_6g11200.1	100	0	1618	AMP deaminase [Fragaria vesca subsp. vesca]
TRINITY_DN66319_c0_g1	TRINITY_DN66319_c0_g1_i1	FvH4_5g29350.1	100	4e-14	71.2	anaphase-promoting complex subunit 2 [Fragaria vesca subsp. vesca]
TRINITY_DN1036_c3_g1	TRINITY_DN1036_c3_g1_i1	FvH4_3g04050.1	100	0	1500	anaphase-promoting complex subunit 4 [Fragaria vesca subsp. vesca]
TRINITY_DN7458_c0_g2	TRINITY_DN7458_c0_g2_i2	FvH4_6g38720.1	100	0	1220	anaphase-promoting complex subunit 5 isoform X1 [Fragaria vesca subsp. vesca]
TRINITY_DN11662_c0_g2	TRINITY_DN11662_c0_g2_i1	FvH4_3g18210.1	100	0	1142	anaphase-promoting complex subunit 6 [Fragaria vesca subsp. vesca]
TRINITY_DN20405_c0_g2	TRINITY_DN20405_c0_g2_i1	FvH4_4g17530.1	100	0	964	anaphase-promoting complex subunit 7 [Fragaria vesca subsp. vesca]
TRINITY_DN2068_c0_g3	TRINITY_DN2068_c0_g3_i1	FvH4_5g16310.1	100	0	1157	anaphase-promoting complex subunit 8 [Fragaria vesca subsp. vesca]
TRINITY_DN736_c0_g2	TRINITY_DN736_c0_g2_i9	FvH4_5g22350.1	100	0	712	angio-associated migratory cell protein-like [Fragaria vesca subsp. vesca]<>angio-associated migratory cell protein-like [Fragaria vesca subsp. vesca]
TRINITY_DN3001_c0_g1	TRINITY_DN3001_c0_g1_i6	FvH4_2g18710.1	100	1e-80	261	ankyrin repeat and SAM domain-containing protein 6 isoform X1 [Fragaria vesca subsp. vesca]
TRINITY_DN2493_c0_g1	TRINITY_DN2493_c0_g1_i4	FvH4_4g00280.1	100	0	1167	ankyrin repeat domain-containing protein 13C [Fragaria vesca subsp. vesca]
TRINITY_DN17066_c0_g3	TRINITY_DN17066_c0_g3_i2	FvH4_2g17270.1	100	0	612	ankyrin repeat domain-containing protein 2 [Fragaria vesca subsp. vesca]
TRINITY_DN10078_c1_g1	TRINITY_DN10078_c1_g1_i1	FvH4_2g24420.1	100	0	847	ankyrin repeat domain-containing protein 65-like
TRINITY_DN24679_c0_g1	TRINITY_DN24679_c0_g1_i1	FvH4_1g28430.1	100	0	1115	ankyrin repeat domain-containing protein 65-like [Fragaria vesca subsp. vesca]
TRINITY_DN2804_c0_g2	TRINITY_DN2804_c0_g2_i9	FvH4_4g33630.1	100	0	888	ankyrin repeat-containing protein At2g01680 [Fragaria vesca subsp. vesca]
TRINITY_DN17233_c0_g1	TRINITY_DN17233_c0_g1_i2	FvH4_2g31340.1	100	0	900	ankyrin repeat-containing protein At2g01680-like [Fragaria vesca subsp. vesca]
TRINITY_DN1781_c0_g2	TRINITY_DN1781_c0_g2_i3	FvH4_4g07110.1	100	0	627	ankyrin repeat-containing protein At3g12360-like isoform X1 [Fragaria vesca subsp. vesca]<>ankyrin repeat-containing protein At3g12360-like isoform X1 [Fragaria vesca subsp. vesca]<>ankyrin repeat-containing protein At3g12360-like isoform X1 [Fragaria vesca subsp. vesca]
TRINITY_DN140360_c0_g1	TRINITY_DN140360_c0_g1_i1	FvH4_1g18590.1	100	0	742	ankyrin repeat-containing protein At5g02620-like [Fragaria vesca subsp. vesca]
TRINITY_DN2957_c0_g1	TRINITY_DN2957_c0_g1_i4	FvH4_1g00250.1	100	0	631	ankyrin repeat-containing protein At5g02620-like [Fragaria vesca subsp. vesca]
TRINITY_DN10943_c0_g2	TRINITY_DN10943_c0_g2_i1	FvH4_4g24410.1	100	0	1337	ankyrin-3-like [Fragaria vesca subsp. vesca]
TRINITY_DN238344_c0_g1	TRINITY_DN238344_c0_g1_i1	FvH4_3g16120.1	100	0	1168	ankyrin-3-like [Fragaria vesca subsp. vesca]
TRINITY_DN7189_c0_g1	TRINITY_DN7189_c0_g1_i1	FvH4_5g24200.1	100	3e-94	287	ankyrin-3-like [Fragaria vesca subsp. vesca]
TRINITY_DN28389_c0_g2	TRINITY_DN28389_c0_g2_i1	FvH4_5g37610.1	100	0	623	annexin D1-like [Fragaria vesca subsp. vesca]
TRINITY_DN289655_c0_g1	TRINITY_DN289655_c0_g1_i1	FvH4_7g02660.1	100	0	649	annexin D4 [Fragaria vesca subsp. vesca]
TRINITY_DN5312_c0_g1	TRINITY_DN5312_c0_g1_i2	FvH4_5g36780.1	100	0	645	annexin D5-like [Fragaria vesca subsp. vesca]
TRINITY_DN9993_c0_g1	TRINITY_DN9993_c0_g1_i1	FvH4_5g36750.1	100	0	630	annexin D5-like [Fragaria vesca subsp. vesca]
TRINITY_DN176244_c0_g1	TRINITY_DN176244_c0_g1_i1	FvH4_1g26060.1	100	2e-124	361	annexin D7-like [Fragaria vesca subsp. vesca]
TRINITY_DN7671_c0_g1	TRINITY_DN7671_c0_g1_i1	FvH4_6g32370.1	100	6e-25	95.1	anoctamin-like protein At1g73020 isoform X1 [Prunus persica]<>hypothetical protein PRUPE_3G053200 [Prunus persica]
TRINITY_DN283511_c0_g1	TRINITY_DN283511_c0_g1_i1	FvH4_3g18470.1	100	1e-31	111	anther-specific protein LAT52-like [Fragaria vesca subsp. vesca]
TRINITY_DN55160_c1_g1	TRINITY_DN55160_c1_g1_i1	FvH4_5g13980.1	100	5e-59	189	anthocyanidin 3-O-glucoside 2''-O-glucosyltransferase-like [Fragaria vesca subsp. vesca]
TRINITY_DN5177_c0_g1	TRINITY_DN5177_c0_g1_i1	FvH4_3g38400.1	100	0	982	anthocyanidin 3-O-glucosyltransferase 2-like [Fragaria vesca subsp. vesca]
TRINITY_DN16369_c0_g1	TRINITY_DN16369_c0_g1_i1	FvH4_1g14030.1	100	0	673	anthocyanidin 3-O-glucosyltransferase 5-like [Fragaria vesca subsp. vesca]
TRINITY_DN13710_c0_g1	TRINITY_DN13710_c0_g1_i1	FvH4_7g30540.1	100	0	868	anthocyanidin 5,3-O-glucosyltransferase [Fragaria vesca subsp. vesca]
TRINITY_DN3322_c0_g1	TRINITY_DN3322_c0_g1_i1	FvH4_5g31920.1	100	0	996	anthocyanidin 5,3-O-glucosyltransferase-like [Fragaria vesca subsp. vesca]
TRINITY_DN41117_c0_g1	TRINITY_DN41117_c0_g1_i1	FvH4_5g24450.1	100	0	962	anthranilate N-benzoyltransferase protein 1 [Fragaria vesca subsp. vesca]
TRINITY_DN3855_c0_g1	TRINITY_DN3855_c0_g1_i1	FvH4_5g05490.1	100	0	753	anthranilate phosphoribosyltransferase, chloroplastic isoform X1 [Fragaria vesca subsp. vesca]
TRINITY_DN33104_c0_g1	TRINITY_DN33104_c0_g1_i2	FvH4_3g33930.1	100	7e-50	158	anthranilate synthase alpha subunit 1 chloroplastic [Prunus yedoensis var. nudiflora]
TRINITY_DN14711_c0_g1	TRINITY_DN14711_c0_g1_i3	FvH4_4g33060.1	100	3e-119	355	anthranilate synthase beta subunit 1, chloroplastic-like [Fragaria vesca subsp. vesca]
TRINITY_DN4714_c0_g1	TRINITY_DN4714_c0_g1_i2	FvH4_2g23730.1	100	2e-87	283	antifungal protein ginkbilobin-2-like [Fragaria vesca subsp. vesca]
TRINITY_DN262343_c0_g1	TRINITY_DN262343_c0_g1_i1	FvH4_1g13510.1	100	3e-75	233	anti-muellerian hormone type-2 receptor
TRINITY_DN1047_c0_g1	TRINITY_DN1047_c0_g1_i2	FvH4_4g25870.1	100	0	820	AP-1 complex subunit mu-2 [Fragaria vesca subsp. vesca]
TRINITY_DN1990_c1_g2	TRINITY_DN1990_c1_g2_i1	FvH4_5g21870.1	100	0	861	AP-2 complex subunit mu [Fragaria vesca subsp. vesca]
TRINITY_DN10580_c0_g1	TRINITY_DN10580_c0_g1_i6	FvH4_5g19890.1	100	4e-116	370	AP2/ERF and B3 domain-containing protein Os01g0141000-like [Fragaria vesca subsp. vesca]
TRINITY_DN1308_c0_g2	TRINITY_DN1308_c0_g2_i1	FvH4_4g28030.1	100	0	697	AP2/ERF and B3 domain-containing transcription repressor TEM1-like [Fragaria vesca subsp. vesca]
TRINITY_DN326065_c0_g1	TRINITY_DN326065_c0_g1_i1	FvH4_6g45390.1	100	1e-175	490	AP2/ERF and B3 domain-containing transcription repressor TEM1-like [Fragaria vesca subsp. vesca]
TRINITY_DN33988_c0_g1	TRINITY_DN33988_c0_g1_i1	FvH4_6g49200.1	100	0	837	AP2-like ethylene-responsive transcription factor At1g16060 [Fragaria vesca subsp. vesca]
TRINITY_DN1727_c0_g2	TRINITY_DN1727_c0_g2_i1	FvH4_6g07890.1	100	0	853	AP-3 complex subunit mu [Fragaria vesca subsp. vesca]<>AP-3 complex subunit mu [Fragaria vesca subsp. vesca]
TRINITY_DN6397_c0_g1	TRINITY_DN6397_c0_g1_i2	FvH4_4g07170.1	100	0	765	AP-5 complex subunit zeta-1 [Fragaria vesca subsp. vesca]
TRINITY_DN10429_c0_g1	TRINITY_DN10429_c0_g1_i1	FvH4_1g01260.1	100	5e-130	377	apolipoprotein D [Fragaria vesca subsp. vesca]
TRINITY_DN11108_c0_g1	TRINITY_DN11108_c0_g1_i3	FvH4_3g26670.1	100	0	651	apoptosis-inducing factor homolog B [Fragaria vesca subsp. vesca]<>apoptosis-inducing factor homolog B [Fragaria vesca subsp. vesca]
TRINITY_DN1437_c4_g1	TRINITY_DN1437_c4_g1_i1	FvH4_3g25500.1	100	0	799	apyrase 2-like [Fragaria vesca subsp. vesca]
TRINITY_DN1591_c0_g2	TRINITY_DN1591_c0_g2_i4	FvH4_6g28790.1	100	3e-136	427	aquaporin NIP6-1 [Fragaria vesca subsp. vesca]
TRINITY_DN232_c0_g10	TRINITY_DN232_c0_g1_i10	FvH4_7g19490.1	100	9e-128	399	aquaporin PIP2-1 [Fragaria vesca subsp. vesca]<>plasma membrane intrinsic protein subtype 2 aquaporin [Fragaria x ananassa]<>plasma membrane intrinsic protein subtype 2 aquaporin [Fragaria x ananassa]<>plasma membrane intrinsic protein subtype 2 aquaporin [Fragaria x ananassa]<>plasma membrane intrinsic protein subtype 2 aquaporin [Fragaria x ananassa]
TRINITY_DN1922_c0_g1	TRINITY_DN1922_c0_g1_i6	FvH4_2g15440.1	100	2e-160	491	aquaporin PIP2-7 [Fragaria vesca subsp. vesca]
TRINITY_DN6941_c0_g1	TRINITY_DN6941_c0_g1_i1	FvH4_6g43030.1	100	9e-147	427	aquaporin SIP1-1-like [Fragaria vesca subsp. vesca]
TRINITY_DN7094_c0_g1	TRINITY_DN7094_c0_g1_i3	FvH4_6g16770.1	100	1e-141	420	aquaporin TIP1-1-like [Fragaria vesca subsp. vesca]
TRINITY_DN6980_c0_g2	TRINITY_DN6980_c0_g2_i2	FvH4_2g35700.1	100	2e-160	463	aquaporin TIP4-1 [Fragaria vesca subsp. vesca]
TRINITY_DN21305_c0_g2	TRINITY_DN21305_c0_g2_i1	FvH4_2g02190.1	100	0	576	aquaporin-like [Fragaria vesca subsp. vesca]
TRINITY_DN9045_c0_g1	TRINITY_DN9045_c0_g1_i3	FvH4_7g15910.1	100	1e-12	65.1	arabinogalactan peptide 16 [Fragaria vesca subsp. vesca]
TRINITY_DN77685_c0_g1	TRINITY_DN77685_c0_g1_i1	FvH4_7g30990.1	100	1e-36	124	arabinogalactan peptide 20-like \\ 1.10E-24 \\ 64.87 %
TRINITY_DN4925_c0_g1	TRINITY_DN4925_c0_g1_i2	FvH4_7g11450.1	100	1e-144	441	arginase 1, mitochondrial [Fragaria vesca subsp. vesca]
TRINITY_DN547_c2_g1	TRINITY_DN547_c2_g1_i1	FvH4_1g06400.1	100	0	754	arginine--tRNA ligase, cytoplasmic-like isoform X1 [Fragaria vesca subsp. vesca]
TRINITY_DN4710_c0_g1	TRINITY_DN4710_c0_g1_i2	FvH4_6g14600.1	100	9e-16	75.5	argininosuccinate lyase
TRINITY_DN13965_c0_g1	TRINITY_DN13965_c0_g1_i1	FvH4_2g38240.1	100	0	1674	armadillo repeat-containing kinesin-like protein 1 [Fragaria vesca subsp. vesca]
TRINITY_DN7555_c0_g1	TRINITY_DN7555_c0_g1_i2	FvH4_6g42120.1	100	0	919	armadillo repeat-containing protein 3 [Fragaria vesca subsp. vesca]
TRINITY_DN9852_c0_g3	TRINITY_DN9852_c0_g3_i1	FvH4_2g06790.1	100	0	888	armadillo repeat-containing protein 6 [Fragaria vesca subsp. vesca]
TRINITY_DN1327_c0_g4	TRINITY_DN1327_c0_g4_i1	FvH4_4g01960.1	100	0	900	armadillo repeat-containing protein LFR [Fragaria vesca subsp. vesca]
TRINITY_DN4615_c2_g1	TRINITY_DN4615_c2_g1_i7	FvH4_3g01940.1	100	0	788	arogenate dehydratase/prephenate dehydratase 1, chloroplastic isoform X2 [Fragaria vesca subsp. vesca]
TRINITY_DN52489_c0_g1	TRINITY_DN52489_c0_g1_i1	FvH4_3g29870.1	100	0	808	arogenate dehydratase/prephenate dehydratase 6, chloroplastic [Fragaria vesca subsp. vesca]
TRINITY_DN16511_c0_g1	TRINITY_DN16511_c0_g1_i5	FvH4_1g02170.1	100	0	1342	arogenate dehydrogenase 1, chloroplastic-like [Fragaria vesca subsp. vesca]<>arogenate dehydrogenase 1, chloroplastic-like [Fragaria vesca subsp. vesca]
TRINITY_DN12920_c0_g1	TRINITY_DN12920_c0_g1_i1	FvH4_2g32830.1	100	9e-99	296	Arrestin domain-containing protein
TRINITY_DN1092_c0_g2	TRINITY_DN1092_c0_g2_i8	FvH4_1g20910.1	100	0	780	asparagine synthetase [glutamine-hydrolyzing] 2 [Fragaria vesca subsp. vesca]
TRINITY_DN9225_c0_g1	TRINITY_DN9225_c0_g1_i4	FvH4_3g17430.1	100	0	1176	asparagine--tRNA ligase, cytoplasmic 1-like [Fragaria vesca subsp. vesca]
TRINITY_DN5975_c0_g1	TRINITY_DN5975_c0_g1_i1	FvH4_2g17960.1	100	0	1197	asparagine--tRNA ligase, cytoplasmic 2 [Fragaria vesca subsp. vesca]
TRINITY_DN5285_c0_g3	TRINITY_DN5285_c0_g3_i3	FvH4_6g27650.1	100	0	843	aspartate aminotransferase, mitochondrial isoform X1 [Fragaria vesca subsp. vesca]
TRINITY_DN1206_c0_g2	TRINITY_DN1206_c0_g2_i1	FvH4_4g09340.1	100	0	992	aspartate carbamoyltransferase 3, chloroplastic-like isoform X1 [Fragaria vesca subsp. vesca]<>aspartate carbamoyltransferase 3, chloroplastic-like isoform X1 [Fragaria vesca subsp. vesca]
TRINITY_DN4005_c0_g1	TRINITY_DN4005_c0_g1_i3	FvH4_4g33450.1	100	6e-112	358	aspartate-semialdehyde dehydrogenase [Fragaria vesca subsp. vesca]
TRINITY_DN697_c1_g1	TRINITY_DN697_c1_g1_i2	FvH4_2g30550.1	100	0	1046	aspartate--tRNA ligase, cytoplasmic [Fragaria vesca subsp. vesca]
TRINITY_DN4791_c1_g1	TRINITY_DN4791_c1_g1_i1	FvH4_1g25160.1	100	0	868	aspartic protease [Rosa hybrid cultivar]
TRINITY_DN3047_c0_g3	TRINITY_DN3047_c0_g3_i2	FvH4_3g01710.1	100	0	847	aspartic proteinase A1 [Fragaria vesca subsp. vesca]
TRINITY_DN169239_c0_g1	TRINITY_DN169239_c0_g1_i1	FvH4_6g04130.1	100	4e-90	271	aspartic proteinase CDR1-like [Fragaria vesca subsp. vesca]
TRINITY_DN39471_c0_g1	TRINITY_DN39471_c0_g1_i1	FvH4_6g18770.1	100	1e-165	469	aspartic proteinase CDR1-like [Fragaria vesca subsp. vesca]
TRINITY_DN8586_c0_g1	TRINITY_DN8586_c0_g1_i1	FvH4_3g13820.1	100	0	575	aspartic proteinase CDR1-like [Fragaria vesca subsp. vesca]
TRINITY_DN14904_c0_g2	TRINITY_DN14904_c0_g2_i1	FvH4_3g35000.1	100	1e-46	152	aspartic proteinase nepenthesin-1-like [Fragaria vesca subsp. vesca]
TRINITY_DN14904_c0_g3	TRINITY_DN14904_c0_g3_i1	FvH4_3g34990.1	100	0	764	aspartic proteinase nepenthesin-1-like [Fragaria vesca subsp. vesca]
TRINITY_DN265459_c0_g1	TRINITY_DN265459_c0_g1_i1	FvH4_6g04040.1	100	0	746	aspartic proteinase nepenthesin-1-like [Fragaria vesca subsp. vesca]
TRINITY_DN8810_c0_g1	TRINITY_DN8810_c0_g1_i1	FvH4_5g18770.1	100	0	855	aspartic proteinase nepenthesin-2 [Fragaria vesca subsp. vesca]
TRINITY_DN191_c0_g3	TRINITY_DN191_c0_g3_i1	FvH4_1g30150.1	100	0	743	aspartic proteinase PCS1 [Fragaria vesca subsp. vesca]
TRINITY_DN3119_c0_g1	TRINITY_DN3119_c0_g1_i4	FvH4_6g17290.1	100	1e-156	474	aspartic proteinase-like protein 2, partial [Fragaria vesca subsp. vesca]
TRINITY_DN1445_c0_g2	TRINITY_DN1445_c0_g2_i2	FvH4_7g12770.1	100	0	905	ataxin-10-like [Fragaria vesca subsp. vesca]
TRINITY_DN10836_c0_g1	TRINITY_DN10836_c0_g1_i3	FvH4_3g39150.1	100	2e-110	325	ataxin-7-like protein 3 [Fragaria vesca subsp. vesca]
TRINITY_DN33_c3_g1	TRINITY_DN33_c3_g1_i1	FvH4_4g03050.1	100	4e-100	314	AT-hook motif nuclear-localized protein 20-like
TRINITY_DN15681_c0_g1	TRINITY_DN15681_c0_g1_i1	FvH4_7g08070.1	100	2e-108	329	AT-hook motif nuclear-localized protein 23-like
TRINITY_DN52_c3_g2	TRINITY_DN52_c3_g2_i1	FvH4_5g00910.1	100	2e-111	336	AT-hook motif nuclear-localized protein 24
TRINITY_DN943_c0_g1	TRINITY_DN943_c0_g1_i3	FvH4_7g13980.1	100	1e-83	274	AT-hook motif nuclear-localized protein 9-like
TRINITY_DN16371_c0_g1	TRINITY_DN16371_c0_g1_i1	FvH4_7g02550.1	100	4e-174	514	ATP phosphoribosyltransferase 1, chloroplastic-like [Fragaria vesca subsp. vesca]
TRINITY_DN10023_c0_g1	TRINITY_DN10023_c0_g1_i1	FvH4_2g12490.1	100	5e-132	385	ATP synthase delta chain, chloroplastic [Fragaria vesca subsp. vesca]
TRINITY_DN1504_c2_g1	TRINITY_DN1504_c2_g1_i4	FvH4_3g22880.1	100	3e-178	532	ATP synthase gamma chain, chloroplastic-like [Fragaria vesca subsp. vesca]
TRINITY_DN4999_c2_g1	TRINITY_DN4999_c2_g1_i1	FvH4_7g01010.1	100	2e-106	330	ATP synthase subunit O, mitochondrial [Fragaria vesca subsp. vesca]
TRINITY_DN11743_c0_g1	TRINITY_DN11743_c0_g1_i2	FvH4_6g28890.1	100	0	1873	ATPase 9, plasma membrane-type [Fragaria vesca subsp. vesca]
TRINITY_DN15657_c0_g3	TRINITY_DN15657_c0_g3_i1	FvH4_7g32510.1	100	0	763	ATPase family AAA domain-containing protein 1 [Fragaria vesca subsp. vesca]
TRINITY_DN14602_c0_g1	TRINITY_DN14602_c0_g1_i1	FvH4_1g13120.1	100	0	1080	ATPase family AAA domain-containing protein 3-A [Fragaria vesca subsp. vesca]
TRINITY_DN2384_c2_g1	TRINITY_DN2384_c2_g1_i1	FvH4_7g12910.1	100	0	706	ATPase GET3 [Fragaria vesca subsp. vesca]
TRINITY_DN2407_c1_g1	TRINITY_DN2407_c1_g1_i2	FvH4_1g19980.1	100	0	721	ATP-dependent 6-phosphofructokinase 5, chloroplastic-like
TRINITY_DN1827_c1_g1	TRINITY_DN1827_c1_g1_i3	FvH4_2g35190.1	100	0	966	ATP-dependent 6-phosphofructokinase 6 [Fragaria vesca subsp. vesca]
TRINITY_DN7252_c0_g2	TRINITY_DN7252_c0_g2_i1	FvH4_7g04110.1	100	0	588	ATP-dependent Clp protease proteolytic subunit 3, chloroplastic [Fragaria vesca subsp. vesca]
TRINITY_DN8371_c0_g1	TRINITY_DN8371_c0_g1_i1	FvH4_3g11210.1	100	6e-144	421	ATP-dependent Clp protease proteolytic subunit 4, chloroplastic [Fragaria vesca subsp. vesca]
TRINITY_DN5509_c0_g1	TRINITY_DN5509_c0_g1_i1	FvH4_5g00850.1	100	0	578	ATP-dependent Clp protease proteolytic subunit-related protein 2, chloroplastic [Fragaria vesca subsp. vesca]
TRINITY_DN506_c0_g4	TRINITY_DN506_c0_g4_i1	FvH4_7g03750.1	100	7e-63	211	ATP-dependent DNA helicase mph1 [Fragaria vesca subsp. vesca]<>ATP-dependent DNA helicase mph1 [Fragaria vesca subsp. vesca]
TRINITY_DN1577_c0_g1	TRINITY_DN1577_c0_g1_i1	FvH4_6g07200.1	100	0	1183	ATP-dependent DNA helicase Q-like 1 [Fragaria vesca subsp. vesca]
TRINITY_DN14103_c0_g1	TRINITY_DN14103_c0_g1_i1	FvH4_4g26440.1	100	0	2271	ATP-dependent RNA helicase DHX36 isoform X2 [Fragaria vesca subsp. vesca]
TRINITY_DN11045_c0_g1	TRINITY_DN11045_c0_g1_i2	FvH4_6g27780.1	100	0	1232	ATP-dependent zinc metalloprotease FTSH 2, chloroplastic isoform X2 [Fragaria vesca subsp. vesca]
TRINITY_DN21560_c0_g2	TRINITY_DN21560_c0_g2_i1	FvH4_6g45740.1	100	0	1239	ATP-dependent zinc metalloprotease FTSH 9, chloroplastic [Fragaria vesca subsp. vesca]
TRINITY_DN8462_c0_g1	TRINITY_DN8462_c0_g1_i2	FvH4_3g38190.1	100	0	1318	ATP-dependent zinc metalloprotease FTSH 9, chloroplastic [Fragaria vesca subsp. vesca]
TRINITY_DN18319_c0_g2	TRINITY_DN18319_c0_g2_i4	FvH4_2g37610.1	100	0	1246	ATP-dependent zinc metalloprotease FTSH, chloroplastic [Fragaria vesca subsp. vesca]
TRINITY_DN3482_c0_g1	TRINITY_DN3482_c0_g1_i2	FvH4_7g14740.1	100	0	1109	AT-rich interactive domain-containing protein 1 isoform X1 [Fragaria vesca subsp. vesca]
TRINITY_DN9507_c0_g1	TRINITY_DN9507_c0_g1_i2	FvH4_6g35710.1	100	0	1590	AT-rich interactive domain-containing protein 4 [Fragaria vesca subsp. vesca]
TRINITY_DN470_c1_g1	TRINITY_DN470_c1_g1_i3	FvH4_5g28670.1	100	5e-78	128	autophagy protein 5 [Fragaria vesca subsp. vesca]
TRINITY_DN15641_c0_g2	TRINITY_DN15641_c0_g2_i1	FvH4_7g33350.1	100	0	1163	autophagy-related protein 13 [Fragaria vesca subsp. vesca]
TRINITY_DN110_c0_g2	TRINITY_DN110_c0_g2_i1	FvH4_6g06350.1	100	0	782	autophagy-related protein 18a-like [Fragaria vesca subsp. vesca]
TRINITY_DN110_c0_g3	TRINITY_DN110_c0_g3_i2	FvH4_6g06370.1	100	4e-143	438	autophagy-related protein 18a-like [Fragaria vesca subsp. vesca]
TRINITY_DN15345_c0_g1	TRINITY_DN15345_c0_g1_i2	FvH4_3g21770.1	100	0	1694	autophagy-related protein 18f [Fragaria vesca subsp. vesca]
TRINITY_DN7910_c0_g1	TRINITY_DN7910_c0_g1_i1	FvH4_2g24310.1	100	0	1269	autophagy-related protein 18g-like [Fragaria vesca subsp. vesca]
TRINITY_DN3783_c0_g1	TRINITY_DN3783_c0_g1_i2	FvH4_3g01980.1	100	3e-77	248	autophagy-related protein 8C [Fragaria vesca subsp. vesca]<>autophagy-related protein 8C [Fragaria vesca subsp. vesca]
TRINITY_DN8251_c1_g1	TRINITY_DN8251_c1_g1_i3	FvH4_4g06870.1	100	0	1148	auxin efflux carrier component 2-like [Fragaria vesca subsp. vesca]
TRINITY_DN8251_c0_g1	TRINITY_DN8251_c0_g1_i1	FvH4_4g32450.1	100	0	1139	auxin efflux carrier component 3-like [Fragaria vesca subsp. vesca]
TRINITY_DN6504_c0_g1	TRINITY_DN6504_c0_g1_i5	FvH4_5g27860.1	100	0	890	auxin response factor 1 [Fragaria vesca subsp. vesca]<>auxin response factor 1 [Fragaria vesca subsp. vesca]
TRINITY_DN3873_c0_g1	TRINITY_DN3873_c0_g1_i5	FvH4_7g16840.1	100	0	1390	auxin response factor 18 [Fragaria vesca subsp. vesca]
TRINITY_DN3723_c0_g1	TRINITY_DN3723_c0_g1_i1	FvH4_7g19350.1	100	0	1313	auxin response factor 18-like [Fragaria vesca subsp. vesca]
TRINITY_DN741_c0_g1	TRINITY_DN741_c0_g1_i7	FvH4_2g24730.1	100	0	664	auxin response factor 23-like isoform X1 [Fragaria vesca subsp. vesca]
TRINITY_DN15402_c0_g1	TRINITY_DN15402_c0_g1_i2	FvH4_3g08450.1	100	0	1401	auxin response factor 3 [Fragaria vesca subsp. vesca]
TRINITY_DN10087_c0_g1	TRINITY_DN10087_c0_g1_i4	FvH4_2g38760.1	100	0	1677	auxin response factor 5 [Fragaria vesca subsp. vesca]
TRINITY_DN6743_c0_g1	TRINITY_DN6743_c0_g1_i1	FvH4_1g27650.1	100	0	1468	auxin response factor 8 [Fragaria vesca subsp. vesca]
TRINITY_DN37710_c0_g1	TRINITY_DN37710_c0_g1_i1	FvH4_5g21990.1	100	1e-85	268	Auxin responsive SAUR protein
TRINITY_DN11776_c0_g2	TRINITY_DN11776_c0_g2_i2	FvH4_6g11840.1	100	0	818	auxin transporter-like protein 2 [Fragaria vesca subsp. vesca]<>auxin transporter-like protein 2 [Fragaria vesca subsp. vesca]
TRINITY_DN7252_c1_g3	TRINITY_DN7252_c1_g3_i1	FvH4_1g18170.1	100	2e-152	434	auxin-binding protein ABP19a-like [Fragaria vesca subsp. vesca]
TRINITY_DN7996_c0_g1	TRINITY_DN7996_c0_g1_i1	FvH4_1g18630.1	100	5e-136	389	auxin-binding protein ABP19a-like [Fragaria vesca subsp. vesca]
TRINITY_DN7996_c1_g1	TRINITY_DN7996_c1_g1_i1	FvH4_1g08540.1	100	2e-133	402	auxin-binding protein ABP19a-like [Fragaria vesca subsp. vesca]
TRINITY_DN7252_c1_g1	TRINITY_DN7252_c1_g1_i3	FvH4_6g36650.1	100	5e-128	389	auxin-binding protein ABP19a-like [Rosa chinensis]<>putative germin, rmlC-like jelly roll [Rosa chinensis]
TRINITY_DN12767_c0_g1	TRINITY_DN12767_c0_g1_i3	FvH4_2g24150.1	100	3e-118	342	auxin-binding protein T85 [Fragaria vesca subsp. vesca]
TRINITY_DN346563_c0_g1	TRINITY_DN346563_c0_g1_i1	FvH4_6g16380.1	100	4e-37	124	auxin-induced protein 10A5 [Fragaria vesca subsp. vesca]
TRINITY_DN26894_c0_g1	TRINITY_DN26894_c0_g1_i1	FvH4_7g32600.1	100	5e-63	199	auxin-induced protein 10A5-like [Fragaria vesca subsp. vesca]
TRINITY_DN234199_c0_g1	TRINITY_DN234199_c0_g1_i1	FvH4_1g11980.1	100	4e-77	234	auxin-induced protein 15A [Fragaria vesca subsp. vesca]
TRINITY_DN241162_c0_g1	TRINITY_DN241162_c0_g1_i1	FvH4_6g19170.1	100	7e-93	272	auxin-induced protein 15A [Fragaria vesca subsp. vesca]
TRINITY_DN6967_c1_g1	TRINITY_DN6967_c1_g1_i1	FvH4_2g38720.1	100	5e-66	208	auxin-induced protein 15A [Fragaria vesca subsp. vesca]
TRINITY_DN6446_c0_g1	TRINITY_DN6446_c0_g1_i2	FvH4_2g10830.1	100	2e-47	158	auxin-induced protein 15A-like [Fragaria vesca subsp. vesca]
TRINITY_DN9266_c0_g5	TRINITY_DN9266_c0_g5_i1	FvH4_2g10870.1	100	6e-48	160	auxin-induced protein 15A-like [Fragaria vesca subsp. vesca]
TRINITY_DN16931_c0_g1	TRINITY_DN16931_c0_g1_i1	FvH4_6g30860.1	100	1e-112	331	auxin-induced protein IAA6 [Fragaria vesca subsp. vesca]
TRINITY_DN282201_c0_g1	TRINITY_DN282201_c0_g1_i1	FvH4_2g10800.1	100	2e-52	164	auxin-induced protein X10A-like [Fragaria vesca subsp. vesca]
TRINITY_DN42_c0_g2	TRINITY_DN42_c0_g2_i1	FvH4_2g20500.1	100	0	531	auxin-responsive protein IAA11-like isoform X2 [Fragaria vesca subsp. vesca]
TRINITY_DN2956_c2_g2	TRINITY_DN2956_c2_g2_i1	FvH4_4g02280.1	100	1e-167	473	auxin-responsive protein IAA14-like [Fragaria vesca subsp. vesca]
TRINITY_DN881_c1_g1	TRINITY_DN881_c1_g1_i8	FvH4_1g05630.1	100	4e-147	450	auxin-responsive protein IAA27 [Fragaria vesca subsp. vesca]
TRINITY_DN29168_c0_g1	TRINITY_DN29168_c0_g1_i1	FvH4_2g28970.1	100	6e-152	437	auxin-responsive protein IAA29 \\ 2.80E-66 \\ 79.08 %
TRINITY_DN12187_c0_g1	TRINITY_DN12187_c0_g1_i2	FvH4_4g21780.1	100	1e-107	323	auxin-responsive protein IAA31 [Fragaria vesca subsp. vesca]
TRINITY_DN49283_c0_g1	TRINITY_DN49283_c0_g1_i3	FvH4_4g08200.1	100	3e-81	260	auxin-responsive protein IAA33 [Fragaria vesca subsp. vesca]
TRINITY_DN2916_c1_g1	TRINITY_DN2916_c1_g1_i4	FvH4_4g02260.1	100	4e-139	406	auxin-responsive protein IAA4 [Fragaria vesca subsp. vesca]
TRINITY_DN2184_c0_g1	TRINITY_DN2184_c0_g1_i1	FvH4_4g23230.1	100	2e-100	300	auxin-responsive protein SAUR32-like
TRINITY_DN11151_c0_g1	TRINITY_DN11151_c0_g1_i1	FvH4_7g11280.1	100	7e-112	340	auxin-responsive protein SAUR36
TRINITY_DN2212_c2_g1	TRINITY_DN2212_c2_g1_i2	FvH4_6g35410.1	100	6e-70	219	auxin-responsive protein SAUR50
TRINITY_DN201722_c0_g1	TRINITY_DN201722_c0_g1_i1	FvH4_2g10770.1	100	3e-71	220	auxin-responsive protein SAUR50-like
TRINITY_DN328707_c0_g1	TRINITY_DN328707_c0_g1_i1	FvH4_1g09300.1	100	1e-54	178	auxin-responsive protein SAUR50-like
TRINITY_DN174603_c0_g1	TRINITY_DN174603_c0_g1_i1	FvH4_3g15820.1	100	2e-60	193	auxin-responsive protein SAUR71
TRINITY_DN3292_c1_g1	TRINITY_DN3292_c1_g1_i1	FvH4_3g15390.1	100	1e-57	192	auxin-responsive protein SAUR71-like
TRINITY_DN339892_c0_g1	TRINITY_DN339892_c0_g1_i1	FvH4_6g35400.1	100	4e-61	187	auxin-responsive protein SAUR71-like
TRINITY_DN49891_c0_g1	TRINITY_DN49891_c0_g1_i1	FvH4_5g08770.1	100	1e-90	266	auxin-responsive protein SAUR71-like [Rosa chinensis]<>putative small auxin-up RNA [Rosa chinensis]
TRINITY_DN11822_c0_g1	TRINITY_DN11822_c0_g1_i1	FvH4_2g36430.1	100	1e-100	319	auxin-responsive protein SAUR72
TRINITY_DN35186_c0_g1	TRINITY_DN35186_c0_g1_i1	FvH4_5g08780.1	100	9e-125	354	auxin-responsive protein SAUR72-like
TRINITY_DN46688_c0_g1	TRINITY_DN46688_c0_g1_i1	FvH4_5g10560.1	100	5e-47	159	Avr9/Cf-9 rapidly elicited protein
TRINITY_DN1546_c0_g1	TRINITY_DN1546_c0_g1_i1	FvH4_7g11260.1	100	2e-145	417	axial regulator YABBY 1 isoform X2 [Fragaria vesca subsp. vesca]
TRINITY_DN14781_c0_g1	TRINITY_DN14781_c0_g1_i1	FvH4_1g03040.1	100	1e-124	360	axial regulator YABBY 5 isoform X1 [Fragaria vesca subsp. vesca]
TRINITY_DN6573_c0_g1	TRINITY_DN6573_c0_g1_i1	FvH4_4g24540.1	100	1e-24	100	b12d protein
TRINITY_DN6493_c0_g1	TRINITY_DN6493_c0_g1_i2	FvH4_6g53510.1	100	0	576	B2 protein [Fragaria vesca subsp. vesca]
TRINITY_DN5072_c0_g2	TRINITY_DN5072_c0_g2_i6	FvH4_1g22280.1	100	1e-133	409	B3 domain-containing protein At2g33720-like [Fragaria vesca subsp. vesca]
TRINITY_DN1308_c0_g1	TRINITY_DN1308_c0_g1_i3	FvH4_6g19560.1	100	0	586	B3 domain-containing protein At2g36080-like [Fragaria vesca subsp. vesca]
TRINITY_DN19795_c0_g1	TRINITY_DN19795_c0_g1_i1	FvH4_1g14710.1	100	3e-108	316	B3 domain-containing protein At3g18960-like [Fragaria vesca subsp. vesca]
TRINITY_DN12456_c0_g2	TRINITY_DN12456_c0_g2_i3	FvH4_7g16760.1	100	9e-136	267	B3 domain-containing protein At5g18090-like [Fragaria vesca subsp. vesca]
TRINITY_DN161189_c0_g1	TRINITY_DN161189_c0_g1_i1	FvH4_2g41030.1	100	0	516	B3 domain-containing protein Os01g0234100-like isoform X1 [Fragaria vesca subsp. vesca]
TRINITY_DN160147_c0_g1	TRINITY_DN160147_c0_g1_i2	FvH4_2g06280.1	100	2e-47	155	B3 domain-containing protein Os01g0234100-like isoform X7 [Rosa chinensis]
TRINITY_DN11732_c0_g1	TRINITY_DN11732_c0_g1_i1	FvH4_2g06970.1	100	1e-162	473	B3 domain-containing protein Os01g0723500-like [Fragaria vesca subsp. vesca]
TRINITY_DN3356_c0_g1	TRINITY_DN3356_c0_g1_i1	FvH4_7g07710.1	100	9e-94	275	B3 domain-containing protein Os04g0386900-like [Fragaria vesca subsp. vesca]
TRINITY_DN7649_c0_g1	TRINITY_DN7649_c0_g1_i1	FvH4_7g07720.1	100	3e-106	308	B3 domain-containing protein Os04g0386900-like [Fragaria vesca subsp. vesca]<>B3 domain-containing protein Os04g0386900-like [Fragaria vesca subsp. vesca]
TRINITY_DN10461_c1_g1	TRINITY_DN10461_c1_g1_i7	FvH4_2g06320.1	100	3e-85	216	B3 domain-containing protein Os06g0194400-like isoform X1 [Fragaria vesca subsp. vesca]
TRINITY_DN5232_c0_g20	TRINITY_DN5232_c0_g2_i10	FvH4_7g07610.1	100	0	1577	B3 domain-containing protein Os12g0591400-like isoform X1 [Fragaria vesca subsp. vesca]
TRINITY_DN182320_c0_g1	TRINITY_DN182320_c0_g1_i1	FvH4_2g27400.1	100	3e-86	257	B3 domain-containing protein REM5-like [Fragaria vesca subsp. vesca]
TRINITY_DN72662_c0_g1	TRINITY_DN72662_c0_g1_i1	FvH4_2g40960.1	100	1e-165	463	B3 domain-containing protein REM9-like [Fragaria vesca subsp. vesca]
TRINITY_DN3951_c0_g10	TRINITY_DN3951_c0_g1_i10	FvH4_3g21640.1	100	2e-73	241	B3 domain-containing transcription factor FUS3-like [Fragaria vesca subsp. vesca]
TRINITY_DN24225_c0_g1	TRINITY_DN24225_c0_g1_i2	FvH4_3g08930.1	100	4e-72	231	B3 domain-containing transcription factor LEC2-like [Fragaria vesca subsp. vesca]
TRINITY_DN1436_c2_g1	TRINITY_DN1436_c2_g1_i1	FvH4_7g17930.1	100	7e-169	495	B3 domain-containing transcription factor NGA1 [Fragaria vesca subsp. vesca]
TRINITY_DN3067_c0_g1	TRINITY_DN3067_c0_g1_i1	FvH4_5g10410.1	100	0	681	B3 domain-containing transcription factor NGA1-like [Fragaria vesca subsp. vesca]
TRINITY_DN6897_c2_g1	TRINITY_DN6897_c2_g1_i4	FvH4_2g07320.1	100	0	809	B3 domain-containing transcription factor VRN1 [Fragaria vesca subsp. vesca]
TRINITY_DN29916_c0_g1	TRINITY_DN29916_c0_g1_i1	FvH4_7g33560.1	100	0	717	B3 domain-containing transcription factor VRN1-like [Fragaria vesca subsp. vesca]
TRINITY_DN1133_c2_g1	TRINITY_DN1133_c2_g1_i3	FvH4_3g39130.1	100	3e-68	229	BAG family molecular chaperone regulator 1 [Fragaria vesca]<>BAG protein [Fragaria vesca]
TRINITY_DN11744_c0_g1	TRINITY_DN11744_c0_g1_i1	FvH4_5g01500.1	100	0	614	BAG family molecular chaperone regulator 2 [Fragaria vesca]<>BAG protein [Fragaria vesca]
TRINITY_DN10481_c0_g1	TRINITY_DN10481_c0_g1_i1	FvH4_7g29010.1	100	0	622	BAG family molecular chaperone regulator 3 [Fragaria vesca]<>BAG protein [Fragaria vesca]
TRINITY_DN763_c4_g1	TRINITY_DN763_c4_g1_i2	FvH4_3g09490.1	100	8e-107	333	BAG family molecular chaperone regulator 3-like [Fragaria vesca subsp. vesca]
TRINITY_DN4071_c0_g1	TRINITY_DN4071_c0_g1_i2	FvH4_7g15690.1	100	0	2173	BAG family molecular chaperone regulator 6 isoform X1 [Fragaria vesca subsp. vesca]
TRINITY_DN2549_c0_g1	TRINITY_DN2549_c0_g1_i1	FvH4_4g23260.1	100	0	567	BAG protein [Fragaria vesca]
TRINITY_DN9247_c0_g1	TRINITY_DN9247_c0_g1_i1	FvH4_3g15900.1	100	0	923	BAHD acyltransferase At5g47980-like [Fragaria vesca subsp. vesca]
TRINITY_DN6736_c0_g1	TRINITY_DN6736_c0_g1_i1	FvH4_7g30000.1	100	0	860	BAHD acyltransferase DCR [Fragaria vesca subsp. vesca]
TRINITY_DN2674_c0_g1	TRINITY_DN2674_c0_g1_i2	FvH4_2g35760.1	100	0	754	bark storage protein A-like [Fragaria vesca subsp. vesca]
TRINITY_DN10005_c0_g1	TRINITY_DN10005_c0_g1_i1	FvH4_2g23780.1	100	0	786	basic 7S globulin 2-like [Fragaria vesca subsp. vesca]
TRINITY_DN198796_c0_g1	TRINITY_DN198796_c0_g1_i1	FvH4_4g14600.1	100	0	830	basic 7S globulin-like [Fragaria vesca subsp. vesca]
TRINITY_DN10450_c0_g1	TRINITY_DN10450_c0_g1_i1	FvH4_6g53210.1	100	5e-89	268	basic blue protein [Fragaria vesca subsp. vesca]
TRINITY_DN9451_c0_g1	TRINITY_DN9451_c0_g1_i2	FvH4_2g15050.1	100	6e-85	263	basic blue protein [Fragaria vesca subsp. vesca]
TRINITY_DN236936_c0_g1	TRINITY_DN236936_c0_g1_i1	FvH4_7g12440.1	100	5e-74	219	basic blue protein-like [Fragaria vesca subsp. vesca]
TRINITY_DN323558_c0_g1	TRINITY_DN323558_c0_g1_i1	FvH4_5g01030.1	100	9e-94	271	basic blue protein-like [Fragaria vesca subsp. vesca]
TRINITY_DN338787_c0_g1	TRINITY_DN338787_c0_g1_i1	FvH4_2g02920.1	100	2e-125	364	basic form of pathogenesis-related protein 1-like [Fragaria vesca subsp. vesca]
TRINITY_DN11567_c0_g1	TRINITY_DN11567_c0_g1_i1	FvH4_2g02880.1	100	9e-124	362	basic form of pathogenesis-related protein 1-like [Rosa chinensis]<>hypothetical protein RchiOBHm_Chr6g0247401 [Rosa chinensis]
TRINITY_DN13836_c0_g1	TRINITY_DN13836_c0_g1_i1	FvH4_6g26970.1	100	0	586	basic leucine zipper 34 [Fragaria vesca subsp. vesca]<>basic leucine zipper 34 [Fragaria vesca subsp. vesca]
TRINITY_DN33784_c0_g1	TRINITY_DN33784_c0_g1_i2	FvH4_3g19010.1	100	3e-136	337	basic leucine zipper 34-like [Malus domestica]
TRINITY_DN17268_c0_g1	TRINITY_DN17268_c0_g1_i2	FvH4_4g28780.1	100	2e-131	378	basic leucine zipper 43 [Fragaria vesca subsp. vesca]
TRINITY_DN338669_c0_g1	TRINITY_DN338669_c0_g1_i1	FvH4_5g13260.1	100	6e-58	178	basic leucine zipper 43 [Fragaria vesca subsp. vesca]
TRINITY_DN9797_c1_g3	TRINITY_DN9797_c1_g3_i2	FvH4_6g46000.1	100	2e-113	340	basic leucine zipper 43 [Fragaria vesca subsp. vesca]
TRINITY_DN21281_c0_g1	TRINITY_DN21281_c0_g1_i1	FvH4_5g36430.1	100	7e-27	102	basic salivary proline-rich protein 1 [Fragaria vesca subsp. vesca]
TRINITY_DN4143_c0_g1	TRINITY_DN4143_c0_g1_i1	FvH4_2g05020.1	100	6e-163	463	basic secretory protease
TRINITY_DN33673_c0_g1	TRINITY_DN33673_c0_g1_i2	FvH4_2g10070.1	100	9e-127	370	B-box zinc finger protein 20-like [Fragaria vesca subsp. vesca]
TRINITY_DN8254_c3_g1	TRINITY_DN8254_c3_g1_i2	FvH4_3g17750.1	100	2e-97	300	B-box zinc finger protein 22 [Fragaria vesca subsp. vesca]
TRINITY_DN17776_c0_g1	TRINITY_DN17776_c0_g1_i1	FvH4_6g37140.1	100	5e-138	406	B-box zinc finger protein 32 [Fragaria vesca subsp. vesca]
TRINITY_DN35402_c0_g1	TRINITY_DN35402_c0_g1_i1	FvH4_6g43580.1	100	7e-74	228	B-box zinc finger protein 32-like [Fragaria vesca subsp. vesca]
TRINITY_DN2384_c1_g2	TRINITY_DN2384_c1_g2_i1	FvH4_3g12690.1	100	0	535	B-box-type zinc finger
TRINITY_DN303_c2_g1	TRINITY_DN303_c2_g1_i2	FvH4_2g18660.1	100	9e-78	238	B-cell receptor-associated protein 31 [Fragaria vesca subsp. vesca]<>B-cell receptor-associated protein 31 [Fragaria vesca subsp. vesca]
TRINITY_DN5162_c0_g1	TRINITY_DN5162_c0_g1_i2	FvH4_6g42950.1	100	8e-62	209	B-cell receptor-associated protein 31-like [Fragaria vesca subsp. vesca]
TRINITY_DN858_c0_g3	TRINITY_DN858_c0_g3_i1	FvH4_2g39260.1	100	0	795	BEL1-like homeodomain protein 3 [Fragaria vesca subsp. vesca]
TRINITY_DN544_c3_g1	TRINITY_DN544_c3_g1_i1	FvH4_2g09770.1	100	0	1248	BEL1-like homeodomain protein 6 [Fragaria vesca subsp. vesca]
TRINITY_DN8538_c0_g1	TRINITY_DN8538_c0_g1_i1	FvH4_6g12810.1	100	0	659	BEL1-like homeodomain protein 9 isoform X1 [Fragaria vesca subsp. vesca]
TRINITY_DN2742_c0_g1	TRINITY_DN2742_c0_g1_i1	FvH4_1g14040.1	100	1e-177	520	BES1/BZR1 homolog protein 2 [Fragaria vesca subsp. vesca]
TRINITY_DN335_c11_g1	TRINITY_DN335_c11_g1_i1	FvH4_3g07150.1	100	1e-141	412	BES1/BZR1 homolog protein 4 [Fragaria vesca subsp. vesca]
TRINITY_DN4259_c0_g3	TRINITY_DN4259_c0_g3_i1	FvH4_2g22020.1	100	9e-81	248	bet1-like SNARE 1-1 [Fragaria vesca subsp. vesca]
TRINITY_DN4874_c0_g1	TRINITY_DN4874_c0_g1_i7	FvH4_2g11680.1	100	2e-99	306	beta carbonic anhydrase 5, chloroplastic [Fragaria vesca subsp. vesca]
TRINITY_DN14590_c0_g10	TRINITY_DN14590_c0_g1_i10	FvH4_4g31270.1	100	0	1293	beta-1,3-galactosyltransferase 15 [Fragaria vesca subsp. vesca]<>beta-1,3-galactosyltransferase 15 [Fragaria vesca subsp. vesca]
TRINITY_DN7057_c0_g1	TRINITY_DN7057_c0_g1_i1	FvH4_4g05230.1	100	0	1216	beta-amylase 1, chloroplastic [Fragaria vesca subsp. vesca]
TRINITY_DN12595_c0_g2	TRINITY_DN12595_c0_g2_i1	FvH4_5g29490.1	100	0	951	beta-amyrin 28-oxidase-like [Fragaria vesca subsp. vesca]
TRINITY_DN17066_c0_g1	TRINITY_DN17066_c0_g1_i1	FvH4_3g24410.1	100	0	958	beta-amyrin 28-oxidase-like [Fragaria vesca subsp. vesca]
TRINITY_DN235290_c0_g1	TRINITY_DN235290_c0_g1_i1	FvH4_3g38090.1	100	2e-36	121	beta-amyrin 28-oxidase-like [Rosa chinensis]<>putative cytochrome P450 [Rosa chinensis]
TRINITY_DN2481_c0_g1	TRINITY_DN2481_c0_g1_i7	FvH4_6g36520.1	100	0	1575	beta-amyrin synthase-like [Fragaria vesca subsp. vesca]
TRINITY_DN21298_c0_g1	TRINITY_DN21298_c0_g1_i4	FvH4_5g03020.1	100	0	517	beta-carotene 3-hydroxylase 1, chloroplastic-like [Fragaria vesca subsp. vesca]
TRINITY_DN68628_c0_g2	TRINITY_DN68628_c0_g2_i1	FvH4_5g10820.1	100	7e-117	337	beta-carotene isomerase D27, chloroplastic isoform X2 [Fragaria vesca subsp. vesca]
TRINITY_DN4400_c0_g1	TRINITY_DN4400_c0_g1_i1	FvH4_1g27560.1	100	0	920	beta-catenin-like protein 1 [Fragaria vesca subsp. vesca]
TRINITY_DN17030_c0_g1	TRINITY_DN17030_c0_g1_i1	FvH4_6g33260.1	100	0	1492	beta-galactosidase 1 [Fragaria vesca subsp. vesca]
TRINITY_DN13268_c0_g3	TRINITY_DN13268_c0_g3_i2	FvH4_1g25140.1	100	0	1486	beta-galactosidase 6 isoform X1 [Fragaria vesca subsp. vesca]
TRINITY_DN4469_c0_g2	TRINITY_DN4469_c0_g2_i1	FvH4_3g32630.1	100	0	1056	beta-galactosidase 8 [Fragaria vesca subsp. vesca]
TRINITY_DN1411_c0_g11	TRINITY_DN1411_c0_g1_i11	FvH4_4g13490.1	100	0	1811	beta-galactosidase 9 isoform X1 [Rosa chinensis]<>putative beta-galactosidase [Rosa chinensis]
TRINITY_DN50780_c0_g1	TRINITY_DN50780_c0_g1_i1	FvH4_5g35280.1	100	3e-65	202	beta-galactosidase isoform X5 [Fragaria vesca subsp. vesca]
TRINITY_DN6940_c0_g1	TRINITY_DN6940_c0_g1_i1	FvH4_4g30320.1	100	2e-29	105	beta-glucosidase 1 [Fragaria x ananassa]
TRINITY_DN10735_c0_g1	TRINITY_DN10735_c0_g1_i2	FvH4_3g43490.1	100	0	855	beta-glucosidase 12-like [Fragaria vesca subsp. vesca]
TRINITY_DN401_c0_g3	TRINITY_DN401_c0_g3_i2	FvH4_6g53000.1	100	0	729	beta-glucosidase 13-like [Fragaria vesca subsp. vesca]
TRINITY_DN3115_c0_g2	TRINITY_DN3115_c0_g2_i2	FvH4_3g43520.1	100	0	1047	beta-glucosidase 13-like [Fragaria vesca subsp. vesca]<>beta-glucosidase 3 [Fragaria x ananassa]
TRINITY_DN307_c0_g2	TRINITY_DN307_c0_g2_i2	FvH4_2g00020.1	100	6e-146	454	beta-glucosidase 2 [Fragaria x ananassa]
TRINITY_DN3701_c0_g12	TRINITY_DN3701_c0_g1_i12	FvH4_3g02500.1	100	6e-102	327	beta-glucosidase 47 [Fragaria vesca subsp. vesca]
TRINITY_DN11481_c0_g1	TRINITY_DN11481_c0_g1_i1	FvH4_4g20710.1	100	0	1246	beta-glucosidase-like SFR2, chloroplastic [Fragaria vesca subsp. vesca]
TRINITY_DN4854_c0_g1	TRINITY_DN4854_c0_g1_i2	FvH4_5g39620.1	100	0	1186	beta-hexosaminidase 2 [Fragaria vesca subsp. vesca]
TRINITY_DN3293_c0_g1	TRINITY_DN3293_c0_g1_i2	FvH4_5g16350.1	100	0	991	betaine aldehyde dehydrogenase 1, chloroplastic-like [Fragaria vesca subsp. vesca]
TRINITY_DN15614_c1_g1	TRINITY_DN15614_c1_g1_i1	FvH4_2g23060.1	100	8e-153	439	BI1-like protein [Fragaria vesca subsp. vesca]
TRINITY_DN5816_c0_g1	TRINITY_DN5816_c0_g1_i4	FvH4_4g18490.1	100	1e-77	249	bidirectional sugar transporter SWEET17 [Fragaria vesca subsp. vesca]
TRINITY_DN17406_c0_g1	TRINITY_DN17406_c0_g1_i1	FvH4_7g08940.1	100	4e-165	468	bidirectional sugar transporter SWEET17-like [Fragaria vesca subsp. vesca]
TRINITY_DN284054_c0_g1	TRINITY_DN284054_c0_g1_i1	FvH4_2g14850.1	100	2e-42	137	bidirectional sugar transporter SWEET1-like [Fragaria vesca subsp. vesca]
TRINITY_DN4150_c0_g1	TRINITY_DN4150_c0_g1_i3	FvH4_3g17630.1	100	1e-132	405	bidirectional sugar transporter SWEET2 [Fragaria vesca subsp. vesca]<>bidirectional sugar transporter SWEET2 [Fragaria vesca subsp. vesca]
TRINITY_DN7288_c0_g1	TRINITY_DN7288_c0_g1_i2	FvH4_3g06470.1	100	8e-134	399	bidirectional sugar transporter SWEET2-like [Fragaria vesca subsp. vesca]
TRINITY_DN50946_c0_g1	TRINITY_DN50946_c0_g1_i1	FvH4_7g31080.1	100	2e-173	488	bidirectional sugar transporter SWEET3 [Fragaria vesca subsp. vesca]
TRINITY_DN1606_c0_g1	TRINITY_DN1606_c0_g1_i8	FvH4_5g11560.1	100	5e-65	221	bidirectional sugar transporter SWEET4 [Fragaria vesca subsp. vesca]<>bidirectional sugar transporter SWEET4 [Fragaria vesca subsp. vesca]
TRINITY_DN2591_c0_g1	TRINITY_DN2591_c0_g1_i5	FvH4_6g04670.1	100	0	1004	bifunctional 3-dehydroquinate dehydratase/shikimate dehydrogenase, chloroplastic-like [Fragaria vesca subsp. vesca]
TRINITY_DN30441_c1_g3	TRINITY_DN30441_c1_g3_i1	FvH4_2g00800.1	100	0	1894	bifunctional aspartokinase/homoserine dehydrogenase 2, chloroplastic-like isoform X1 [Fragaria vesca subsp. vesca]
TRINITY_DN8982_c0_g1	TRINITY_DN8982_c0_g1_i2	FvH4_5g01300.1	100	0	625	bifunctional dTDP-4-dehydrorhamnose 3,5-epimerase/dTDP-4-dehydrorhamnose reductase [Fragaria vesca subsp. vesca]
TRINITY_DN585_c1_g1	TRINITY_DN585_c1_g1_i1	FvH4_2g25930.1	100	0	628	bifunctional epoxide hydrolase 2 [Fragaria vesca subsp. vesca]
TRINITY_DN6154_c0_g1	TRINITY_DN6154_c0_g1_i9	FvH4_1g12460.1	100	0	626	bifunctional epoxide hydrolase 2-like [Fragaria vesca subsp. vesca]
TRINITY_DN15380_c0_g1	TRINITY_DN15380_c0_g1_i2	FvH4_3g25810.1	100	2e-97	302	bifunctional nitrilase/nitrile hydratase NIT4B [Fragaria vesca subsp. vesca]
TRINITY_DN8419_c1_g1	TRINITY_DN8419_c1_g1_i3	FvH4_1g10980.1	100	0	663	bifunctional nuclease 2 isoform X1 [Fragaria vesca subsp. vesca]
TRINITY_DN15095_c0_g1	TRINITY_DN15095_c0_g1_i2	FvH4_2g09630.1	100	0	633	bifunctional phosphatase IMPL2, chloroplastic [Fragaria vesca subsp. vesca]
TRINITY_DN13578_c0_g1	TRINITY_DN13578_c0_g1_i1	FvH4_7g13650.1	100	0	696	bifunctional protein FolD 4, chloroplastic [Fragaria vesca subsp. vesca]
TRINITY_DN7753_c0_g1	TRINITY_DN7753_c0_g1_i1	FvH4_5g01780.1	100	0	741	bifunctional UDP-glucose 4-epimerase and UDP-xylose 4-epimerase 1 [Fragaria vesca subsp. vesca]
TRINITY_DN9047_c0_g1	TRINITY_DN9047_c0_g1_i1	FvH4_3g40170.1	100	8e-92	278	biogenesis of lysosome-related organelles complex 1 subunit 1 [Fragaria vesca subsp. vesca]
TRINITY_DN7154_c0_g1	TRINITY_DN7154_c0_g1_i1	FvH4_6g43640.1	100	2e-120	362	blue copper protein [Fragaria vesca subsp. vesca]
TRINITY_DN11631_c0_g1	TRINITY_DN11631_c0_g1_i2	FvH4_5g36400.1	100	5e-35	130	blue copper protein-like [Fragaria vesca subsp. vesca]
TRINITY_DN5329_c0_g1	TRINITY_DN5329_c0_g1_i5	FvH4_3g12030.1	100	6e-104	331	BOI-related E3 ubiquitin-protein ligase 1 [Prunus yedoensis var. nudiflora]
TRINITY_DN4304_c0_g1	TRINITY_DN4304_c0_g1_i1	FvH4_7g13400.1	100	8e-131	374	BON1-associated protein 1 [Fragaria vesca subsp. vesca]
TRINITY_DN10487_c0_g4	TRINITY_DN10487_c0_g4_i2	FvH4_7g15700.1	100	0	536	BON1-associated protein 2 isoform X1 [Fragaria vesca subsp. vesca]
TRINITY_DN13286_c0_g1	TRINITY_DN13286_c0_g1_i3	FvH4_6g30530.1	100	0	1296	boron transporter 4-like [Fragaria vesca subsp. vesca]<>boron transporter 4-like [Fragaria vesca subsp. vesca]
TRINITY_DN13148_c0_g1	TRINITY_DN13148_c0_g1_i2	FvH4_5g32720.1	100	0	813	box C/D snoRNA protein 1 [Fragaria vesca subsp. vesca]
TRINITY_DN22836_c0_g1	TRINITY_DN22836_c0_g1_i1	FvH4_1g18510.1	100	0	747	branched-chain-amino-acid aminotransferase 3, chloroplastic-like [Fragaria vesca subsp. vesca]
TRINITY_DN1901_c0_g1	TRINITY_DN1901_c0_g1_i4	FvH4_2g32420.1	100	0	800	branched-chain-amino-acid aminotransferase 5, chloroplastic-like [Fragaria vesca subsp. vesca]<>branched-chain-amino-acid aminotransferase 5, chloroplastic-like [Fragaria vesca subsp. vesca]<>branched-chain-amino-acid aminotransferase 5, chloroplastic-like [Fragaria vesca subsp. vesca]
TRINITY_DN3623_c0_g1	TRINITY_DN3623_c0_g1_i5	FvH4_2g02760.1	100	0	681	branched-chain-amino-acid aminotransferase 6-like isoform X1 [Fragaria vesca subsp. vesca]
TRINITY_DN3623_c0_g2	TRINITY_DN3623_c0_g2_i1	FvH4_2g02870.1	100	0	645	branched-chain-amino-acid aminotransferase 6-like isoform X1 [Fragaria vesca subsp. vesca]
TRINITY_DN7732_c0_g1	TRINITY_DN7732_c0_g1_i1	FvH4_6g05350.1	100	0	1111	branched-chain-amino-acid aminotransferase-like protein 2 [Fragaria vesca subsp. vesca]
TRINITY_DN155_c0_g2	TRINITY_DN155_c0_g2_i2	FvH4_6g31120.1	100	0	1071	branchpoint-bridging protein-like [Fragaria vesca subsp. vesca]
TRINITY_DN10871_c0_g1	TRINITY_DN10871_c0_g1_i1	FvH4_5g30840.1	100	0	926	BRASSINOSTEROID INSENSITIVE 1-associated receptor kinase 1-like [Fragaria vesca subsp. vesca]
TRINITY_DN7751_c0_g1	TRINITY_DN7751_c0_g1_i1	FvH4_2g38390.1	100	2e-95	309	BRCA1-A complex subunit BRE [Fragaria vesca subsp. vesca]
TRINITY_DN1613_c0_g3	TRINITY_DN1613_c0_g3_i3	FvH4_1g02780.1	100	0	969	BRCA1-associated protein [Fragaria vesca subsp. vesca]
TRINITY_DN100_c0_g1	TRINITY_DN100_c0_g1_i2	FvH4_5g39450.1	100	0	2660	BRCT domain-containing protein At4g02110 [Fragaria vesca subsp. vesca]<>BRCT domain-containing protein At4g02110 [Fragaria vesca subsp. vesca]
TRINITY_DN1341_c0_g1	TRINITY_DN1341_c0_g1_i1	FvH4_7g12020.1	100	0	3556	brefeldin A-inhibited guanine nucleotide-exchange protein 2-like [Fragaria vesca subsp. vesca]
TRINITY_DN1302_c0_g11	TRINITY_DN1302_c0_g1_i11	FvH4_1g09670.1	100	0	2729	brefeldin A-inhibited guanine nucleotide-exchange protein 5 [Fragaria vesca subsp. vesca]
TRINITY_DN1715_c2_g1	TRINITY_DN1715_c2_g1_i1	FvH4_2g34560.1	100	3e-167	483	BRI1 kinase inhibitor 1 [Fragaria vesca subsp. vesca]
TRINITY_DN7400_c0_g1	TRINITY_DN7400_c0_g1_i1	FvH4_5g39310.1	100	0	1743	bromodomain and WD repeat-containing protein 3 [Fragaria vesca subsp. vesca]
TRINITY_DN18282_c0_g1	TRINITY_DN18282_c0_g1_i2	FvH4_3g38240.1	100	5e-136	395	bromodomain-containing protein 4-like
TRINITY_DN5096_c0_g1	TRINITY_DN5096_c0_g1_i1	FvH4_2g31830.1	100	6e-149	435	bromodomain-containing protein DDB_G0278469 \\ 2.40E-40 \\ 88.29 %
TRINITY_DN8231_c0_g1	TRINITY_DN8231_c0_g1_i1	FvH4_4g14080.1	100	0	609	BSD domain-containing protein 1 [Fragaria vesca subsp. vesca]
TRINITY_DN8823_c0_g1	TRINITY_DN8823_c0_g1_i1	FvH4_4g14240.1	100	6e-155	483	BTB/POZ and MATH domain-containing protein 1 [Fragaria vesca subsp. vesca]
TRINITY_DN3383_c0_g10	TRINITY_DN3383_c0_g1_i10	FvH4_7g17410.1	100	6e-177	538	BTB/POZ and MATH domain-containing protein 3 [Fragaria vesca subsp. vesca]
TRINITY_DN15939_c0_g1	TRINITY_DN15939_c0_g1_i1	FvH4_3g09890.1	100	0	1259	BTB/POZ domain-containing protein At1g30440 [Fragaria vesca subsp. vesca]
TRINITY_DN1143_c0_g1	TRINITY_DN1143_c0_g1_i5	FvH4_5g02930.1	100	0	1174	BTB/POZ domain-containing protein At1g63850 [Fragaria vesca subsp. vesca]
TRINITY_DN20671_c0_g1	TRINITY_DN20671_c0_g1_i2	FvH4_2g08750.1	100	0	803	BTB/POZ domain-containing protein At1g63850-like [Fragaria vesca subsp. vesca]
TRINITY_DN6436_c1_g1	TRINITY_DN6436_c1_g1_i4	FvH4_1g24270.1	100	0	585	BTB/POZ domain-containing protein At2g13690 [Fragaria vesca subsp. vesca]
TRINITY_DN7207_c0_g1	TRINITY_DN7207_c0_g1_i2	FvH4_1g01020.1	100	0	924	BTB/POZ domain-containing protein At2g24240 [Fragaria vesca subsp. vesca]
TRINITY_DN1722_c1_g3	TRINITY_DN1722_c1_g3_i1	FvH4_6g20360.1	100	0	904	BTB/POZ domain-containing protein At3g05675 [Fragaria vesca subsp. vesca]<>BTB/POZ domain-containing protein At3g05675 [Fragaria vesca subsp. vesca]<>BTB/POZ domain-containing protein At3g05675 [Fragaria vesca subsp. vesca]
TRINITY_DN1314_c0_g1	TRINITY_DN1314_c0_g1_i1	FvH4_6g11860.1	100	0	909	BTB/POZ domain-containing protein At3g09030 [Fragaria vesca subsp. vesca]
TRINITY_DN11895_c0_g1	TRINITY_DN11895_c0_g1_i1	FvH4_4g36690.1	100	0	800	BTB/POZ domain-containing protein At3g19850-like [Fragaria vesca subsp. vesca]
TRINITY_DN14027_c0_g1	TRINITY_DN14027_c0_g1_i2	FvH4_6g43790.1	100	0	1011	BTB/POZ domain-containing protein At3g22104 [Fragaria vesca subsp. vesca]
TRINITY_DN19876_c0_g1	TRINITY_DN19876_c0_g1_i1	FvH4_3g03040.1	100	0	1053	BTB/POZ domain-containing protein At3g22104-like [Fragaria vesca subsp. vesca]
TRINITY_DN2047_c3_g1	TRINITY_DN2047_c3_g1_i1	FvH4_7g19310.1	100	0	1234	BTB/POZ domain-containing protein At5g03250-like, partial [Fragaria vesca subsp. vesca]
TRINITY_DN17314_c0_g1	TRINITY_DN17314_c0_g1_i3	FvH4_6g41250.1	100	0	1352	BTB/POZ domain-containing protein At5g48130 [Fragaria vesca subsp. vesca]
TRINITY_DN9740_c0_g1	TRINITY_DN9740_c0_g1_i1	FvH4_2g04110.1	100	0	1239	BTB/POZ domain-containing protein NPY2 [Fragaria vesca subsp. vesca]<>BTB/POZ domain-containing protein NPY2 [Fragaria vesca subsp. vesca]
TRINITY_DN6949_c0_g1	TRINITY_DN6949_c0_g1_i2	FvH4_2g08510.1	100	0	530	BURP domain-containing protein 3-like [Fragaria vesca subsp. vesca]
TRINITY_DN3294_c0_g11	TRINITY_DN3294_c0_g1_i11	FvH4_7g14640.1	100	0	624	BURP domain-containing protein 3-like [Fragaria vesca subsp. vesca]
TRINITY_DN1263_c1_g1	TRINITY_DN1263_c1_g1_i3	FvH4_3g16580.1	100	4e-160	479	bystin [Fragaria vesca subsp. vesca]
TRINITY_DN6692_c0_g1	TRINITY_DN6692_c0_g1_i1	FvH4_5g39200.1	100	3e-88	270	bZIP transcription factor 53-like
TRINITY_DN3650_c0_g1	TRINITY_DN3650_c0_g1_i2	FvH4_5g26440.1	100	4e-74	247	bZIP transcription factor 60 [Fragaria vesca subsp. vesca]
TRINITY_DN2671_c0_g1	TRINITY_DN2671_c0_g1_i5	FvH4_3g07160.1	100	3e-35	127	BZR4 [Betula platyphylla]
TRINITY_DN873_c0_g15	TRINITY_DN873_c0_g1_i25	FvH4_3g00230.1	100	0	2054	C2 and GRAM domain-containing protein At1g03370 [Fragaria vesca subsp. vesca]
TRINITY_DN1568_c0_g2	TRINITY_DN1568_c0_g2_i1	FvH4_7g27680.1	100	1e-22	71.2	C2 calcium-dependent membrane targeting
TRINITY_DN12520_c0_g1	TRINITY_DN12520_c0_g1_i1	FvH4_6g44890.1	100	3e-146	412	C2 domain-containing protein
TRINITY_DN9255_c0_g1	TRINITY_DN9255_c0_g1_i4	FvH4_3g16970.1	100	0	813	C2 domain-containing protein At1g53590
TRINITY_DN10403_c1_g1	TRINITY_DN10403_c1_g1_i3	FvH4_3g17020.1	100	0	617	C2 domain-containing protein At1g53590 isoform X1 [Fragaria vesca subsp. vesca]
TRINITY_DN2212_c1_g2	TRINITY_DN2212_c1_g2_i9	FvH4_4g07520.1	100	0	943	cadmium/zinc-transporting ATPase HMA3-like [Fragaria vesca subsp. vesca]<>cadmium/zinc-transporting ATPase HMA3-like [Fragaria vesca subsp. vesca]
TRINITY_DN6374_c0_g1	TRINITY_DN6374_c0_g1_i7	FvH4_5g10430.1	100	0	727	caffeic acid 3-O-methyltransferase [Fragaria vesca subsp. vesca]<>caffeic acid 3-O-methyltransferase [Fragaria vesca subsp. vesca]<>caffeic acid 3-O-methyltransferase [Fragaria vesca subsp. vesca]<>caffeic acid 3-O-methyltransferase [Fragaria vesca subsp. vesca]<>caffeic acid 3-O-methyltransferase [Fragaria vesca subsp. vesca]<>caffeic acid 3-O-methyltransferase [Fragaria vesca subsp. vesca]
TRINITY_DN11067_c0_g1	TRINITY_DN11067_c0_g1_i1	FvH4_6g30610.1	100	0	675	caffeoylshikimate esterase [Fragaria vesca subsp. vesca]
TRINITY_DN329085_c0_g1	TRINITY_DN329085_c0_g1_i1	FvH4_7g19610.1	100	0	612	caffeoylshikimate esterase [Fragaria vesca subsp. vesca]
TRINITY_DN28729_c0_g1	TRINITY_DN28729_c0_g1_i1	FvH4_1g06460.1	100	1e-135	387	caffeoylshikimate esterase-like [Fragaria vesca subsp. vesca]
TRINITY_DN6127_c0_g1	TRINITY_DN6127_c0_g1_i1	FvH4_4g27260.1	100	0	310	caffeoylshikimate esterase-like [Fragaria vesca subsp. vesca]
TRINITY_DN14021_c0_g12	TRINITY_DN14021_c0_g1_i12	FvH4_2g32000.1	100	3e-127	291	calcineurin B-like protein 10 [Fragaria vesca subsp. vesca]<>calcineurin B-like protein 10 [Fragaria vesca subsp. vesca]
TRINITY_DN10673_c0_g1	TRINITY_DN10673_c0_g1_i2	FvH4_5g04840.1	100	2e-141	419	calcineurin B-like protein 7 [Fragaria vesca subsp. vesca]<>calcineurin B-like protein 7 [Fragaria vesca subsp. vesca]<>calcineurin B-like protein 7 [Fragaria vesca subsp. vesca]
TRINITY_DN1215_c0_g1	TRINITY_DN1215_c0_g1_i1	FvH4_1g29580.1	100	0	1447	Calcium and calcium/calmodulin-dependent serine/threonine-protein kinase isoform 1
TRINITY_DN1359_c0_g2	TRINITY_DN1359_c0_g2_i5	FvH4_6g42670.1	100	0	1251	calcium permeable stress-gated cation channel 1-like isoform X1 [Fragaria vesca subsp. vesca]
TRINITY_DN3418_c0_g2	TRINITY_DN3418_c0_g2_i3	FvH4_3g41270.1	100	0	593	calcium uniporter protein 5, mitochondrial-like [Fragaria vesca subsp. vesca]
TRINITY_DN1995_c0_g4	TRINITY_DN1995_c0_g4_i1	FvH4_3g21590.1	100	0	852	calcium/calmodulin-regulated receptor-like kinase 1
TRINITY_DN16509_c0_g1	TRINITY_DN16509_c0_g1_i2	FvH4_2g34510.1	100	2e-68	209	Calcium-binding EF-hand family protein, putative
TRINITY_DN12572_c0_g1	TRINITY_DN12572_c0_g1_i3	FvH4_4g14070.1	100	0	550	calcium-binding protein 39 [Fragaria vesca subsp. vesca]
TRINITY_DN334_c0_g3	TRINITY_DN334_c0_g3_i1	FvH4_1g28870.1	100	4e-90	275	calcium-binding protein CML24-like [Fragaria vesca subsp. vesca]
TRINITY_DN33999_c0_g1	TRINITY_DN33999_c0_g1_i1	FvH4_7g17080.1	100	2e-75	232	calcium-binding protein KIC [Fragaria vesca subsp. vesca]
TRINITY_DN9976_c0_g1	TRINITY_DN9976_c0_g1_i1	FvH4_3g21340.1	100	7e-80	243	calcium-binding protein PBP1 [Fragaria vesca subsp. vesca]
TRINITY_DN23699_c0_g1	TRINITY_DN23699_c0_g1_i1	FvH4_3g03610.1	100	2e-73	235	calcium-binding protein PBP1-like [Fragaria vesca subsp. vesca]
TRINITY_DN326827_c0_g1	TRINITY_DN326827_c0_g1_i1	FvH4_3g03600.1	100	2e-75	225	calcium-binding protein PBP1-like [Fragaria vesca subsp. vesca]
TRINITY_DN7863_c0_g1	TRINITY_DN7863_c0_g1_i1	FvH4_3g21240.1	100	1e-93	279	calcium-binding protein PBP1-like [Fragaria vesca subsp. vesca]
TRINITY_DN326798_c0_g1	TRINITY_DN326798_c0_g1_i1	FvH4_3g29150.1	100	2e-39	136	calcium-binding protein P-like [Fragaria vesca subsp. vesca]
TRINITY_DN281_c1_g5	TRINITY_DN281_c1_g5_i1	FvH4_6g11340.1	100	0	1090	calcium-dependent protein kinase 13 [Fragaria vesca subsp. vesca]
TRINITY_DN329_c0_g1	TRINITY_DN329_c0_g1_i1	FvH4_7g05490.1	100	0	1132	calcium-dependent protein kinase 1-like [Fragaria vesca subsp. vesca]<>calcium-dependent protein kinase 1-like [Fragaria vesca subsp. vesca]<>calcium-dependent protein kinase 1-like [Fragaria vesca subsp. vesca]
TRINITY_DN2567_c1_g1	TRINITY_DN2567_c1_g1_i4	FvH4_5g01410.1	100	0	613	calcium-dependent protein kinase 26 [Fragaria vesca subsp. vesca]
TRINITY_DN2693_c0_g1	TRINITY_DN2693_c0_g1_i2	FvH4_5g03610.1	100	0	985	calcium-dependent protein kinase 3 [Fragaria vesca subsp. vesca]
TRINITY_DN13147_c0_g1	TRINITY_DN13147_c0_g1_i3	FvH4_3g28740.1	100	0	1078	calcium-dependent protein kinase 8-like isoform X2 [Fragaria vesca subsp. vesca]
TRINITY_DN4451_c0_g1	TRINITY_DN4451_c0_g1_i1	FvH4_6g35360.1	100	0	1031	calcium-dependent protein kinase SK5-like [Fragaria vesca subsp. vesca]
TRINITY_DN1623_c1_g1	TRINITY_DN1623_c1_g1_i4	FvH4_6g14760.1	100	0	2187	calcium-transporting ATPase 1, endoplasmic reticulum-type-like [Fragaria vesca subsp. vesca]
TRINITY_DN222_c0_g1	TRINITY_DN222_c0_g1_i1	FvH4_1g17620.1	100	0	1979	calcium-transporting ATPase 2, plasma membrane-type-like [Fragaria vesca subsp. vesca]
TRINITY_DN2513_c1_g1	TRINITY_DN2513_c1_g1_i1	FvH4_3g34570.1	100	0	2061	calcium-transporting ATPase 4, endoplasmic reticulum-type-like [Fragaria vesca subsp. vesca]<>calcium-transporting ATPase 4, endoplasmic reticulum-type-like [Fragaria vesca subsp. vesca]
TRINITY_DN3662_c0_g1	TRINITY_DN3662_c0_g1_i3	FvH4_6g37190.1	100	0	2152	calcium-transporting ATPase 9, plasma membrane-type [Fragaria vesca subsp. vesca]
TRINITY_DN7662_c0_g10	TRINITY_DN7662_c0_g1_i10	FvH4_7g17100.1	100	0	2105	calcium-transporting ATPase, endoplasmic reticulum-type [Fragaria vesca subsp. vesca]<>calcium-transporting ATPase, endoplasmic reticulum-type [Fragaria vesca subsp. vesca]
TRINITY_DN12546_c0_g2	TRINITY_DN12546_c0_g2_i1	FvH4_3g05510.1	100	2e-126	367	calcyclin-binding protein-like [Fragaria vesca subsp. vesca]
TRINITY_DN35133_c0_g1	TRINITY_DN35133_c0_g1_i1	FvH4_5g31240.1	100	2e-43	151	callose synthase 12-like [Rosa chinensis]<>putative 1,3-beta-glucan synthase [Rosa chinensis]
TRINITY_DN1995_c1_g2	TRINITY_DN1995_c1_g2_i1	FvH4_3g44320.1	100	0	3795	callose synthase 9 [Fragaria vesca subsp. vesca]
TRINITY_DN1926_c1_g1	TRINITY_DN1926_c1_g1_i1	FvH4_7g20700.1	100	3e-102	311	calmodulin-5/6/7/8-like [Fragaria vesca subsp. vesca]
TRINITY_DN6262_c0_g1	TRINITY_DN6262_c0_g1_i3	FvH4_6g07150.1	100	0	1140	calmodulin-binding protein 60 G-like
TRINITY_DN12429_c0_g1	TRINITY_DN12429_c0_g1_i1	FvH4_1g15930.1	100	1e-111	331	calmodulin-like protein 1 [Fragaria vesca subsp. vesca]
TRINITY_DN15358_c0_g1	TRINITY_DN15358_c0_g1_i1	FvH4_2g06140.1	100	2e-123	355	calmodulin-like protein 1 [Fragaria vesca subsp. vesca]
TRINITY_DN10852_c0_g1	TRINITY_DN10852_c0_g1_i1	FvH4_2g22890.1	100	3e-129	388	calmodulin-like protein 11
TRINITY_DN577_c1_g1	TRINITY_DN577_c1_g1_i2	FvH4_6g03000.1	100	6e-99	298	calmodulin-like protein 11 [Fragaria vesca subsp. vesca]
TRINITY_DN6063_c0_g1	TRINITY_DN6063_c0_g1_i1	FvH4_2g17620.1	100	5e-82	251	calmodulin-like protein 3
TRINITY_DN4724_c0_g1	TRINITY_DN4724_c0_g1_i3	FvH4_6g07360.1	100	0	632	calreticulin [Fragaria vesca subsp. vesca]
TRINITY_DN6238_c0_g1	TRINITY_DN6238_c0_g1_i1	FvH4_5g39190.1	100	2e-85	257	calvin cycle protein CP12-1, chloroplastic-like [Fragaria vesca subsp. vesca]
TRINITY_DN266955_c0_g1	TRINITY_DN266955_c0_g1_i1	FvH4_5g26470.1	100	7e-88	262	calvin cycle protein CP12-3, chloroplastic [Fragaria vesca subsp. vesca]
TRINITY_DN2288_c0_g1	TRINITY_DN2288_c0_g1_i3	FvH4_1g10330.1	100	3e-119	369	cancer-related nucleoside-triphosphatase homolog [Fragaria vesca subsp. vesca]
TRINITY_DN19389_c0_g1	TRINITY_DN19389_c0_g1_i1	FvH4_3g25490.1	100	0	970	capsanthin/capsorubin synthase, chromoplast-like [Fragaria vesca subsp. vesca]
TRINITY_DN8216_c0_g1	TRINITY_DN8216_c0_g1_i2	FvH4_5g24460.1	100	8e-49	108	carbon catabolite repressor protein 4 homolog 4 isoform X1 [Fragaria vesca subsp. vesca]
TRINITY_DN11660_c0_g1	TRINITY_DN11660_c0_g1_i2	FvH4_3g35690.1	100	0	523	carbonic anhydrase 2-like [Fragaria vesca subsp. vesca]<>carbonic anhydrase 2-like [Fragaria vesca subsp. vesca]
TRINITY_DN13134_c0_g1	TRINITY_DN13134_c0_g1_i1	FvH4_5g09740.1	100	0	620	carbonyl reductase [NADPH] 1 [Fragaria vesca subsp. vesca]
TRINITY_DN8614_c0_g1	TRINITY_DN8614_c0_g1_i1	FvH4_3g07110.1	100	0	520	carboxy-terminal domain RNA polymerase II polypeptide A small phosphatase 1-like [Fragaria vesca subsp. vesca]
TRINITY_DN7370_c0_g2	TRINITY_DN7370_c0_g2_i4	FvH4_1g17250.1	100	0	703	casein kinase II subunit alpha [Fragaria vesca subsp. vesca]
TRINITY_DN25513_c0_g2	TRINITY_DN25513_c0_g2_i1	FvH4_6g19500.1	100	3e-119	346	casparian strip membrane protein 1-like [Fragaria vesca subsp. vesca]
TRINITY_DN28243_c0_g1	TRINITY_DN28243_c0_g1_i1	FvH4_4g31110.1	100	3e-118	344	casparian strip membrane protein 1-like [Fragaria vesca subsp. vesca]
TRINITY_DN4136_c0_g1	TRINITY_DN4136_c0_g1_i1	FvH4_2g15060.1	100	6e-96	288	casparian strip membrane protein 1-like [Fragaria vesca subsp. vesca]
TRINITY_DN161236_c0_g1	TRINITY_DN161236_c0_g1_i2	FvH4_3g25570.1	100	6e-106	310	casparian strip membrane protein 2-like [Fragaria vesca subsp. vesca]
TRINITY_DN11374_c0_g1	TRINITY_DN11374_c0_g1_i1	FvH4_3g11410.1	100	4e-121	348	CASP-like protein 1B1 [Fragaria vesca subsp. vesca]
TRINITY_DN98904_c1_g1	TRINITY_DN98904_c1_g1_i2	FvH4_3g09260.1	100	2e-73	224	CASP-like protein 1C2 [Fragaria vesca subsp. vesca]
TRINITY_DN2045_c3_g1	TRINITY_DN2045_c3_g1_i2	FvH4_4g17290.1	100	8e-116	340	CASP-like protein 1E1 [Rosa chinensis]<>putative casparian strip membrane protein [Rosa chinensis]
TRINITY_DN5140_c0_g1	TRINITY_DN5140_c0_g1_i1	FvH4_5g09090.1	100	8e-87	262	CASP-like protein 1F1 [Fragaria vesca subsp. vesca]
TRINITY_DN8228_c0_g2	TRINITY_DN8228_c0_g2_i4	FvH4_3g00580.1	100	2e-62	211	CASP-like protein 2B1 [Fragaria vesca subsp. vesca]
TRINITY_DN34116_c0_g1	TRINITY_DN34116_c0_g1_i1	FvH4_4g09300.1	100	3e-92	275	CASP-like protein 2C1 [Rosa chinensis]<>putative casparian strip membrane protein [Rosa chinensis]
TRINITY_DN7827_c0_g1	TRINITY_DN7827_c0_g1_i2	FvH4_3g22910.1	100	1e-51	178	CASP-like protein 2D1 [Fragaria vesca subsp. vesca]
TRINITY_DN4858_c0_g3	TRINITY_DN4858_c0_g3_i1	FvH4_6g32160.1	100	1e-57	199	CASP-like protein 3A2 [Fragaria vesca subsp. vesca]
TRINITY_DN3582_c0_g2	TRINITY_DN3582_c0_g2_i2	FvH4_5g05230.1	100	6e-108	335	CASP-like protein 4A3 [Fragaria vesca subsp. vesca]
TRINITY_DN11719_c0_g1	TRINITY_DN11719_c0_g1_i3	FvH4_6g10520.1	100	8e-96	288	CASP-like protein 4B1 [Fragaria vesca subsp. vesca]
TRINITY_DN183831_c0_g1	TRINITY_DN183831_c0_g1_i1	FvH4_5g17870.1	100	9e-47	151	CASP-like protein 4D1 [Fragaria vesca subsp. vesca]
TRINITY_DN1990_c1_g1	TRINITY_DN1990_c1_g1_i1	FvH4_7g22200.1	100	6e-63	200	CASP-like protein 4D1 [Fragaria vesca subsp. vesca]
TRINITY_DN4879_c0_g1	TRINITY_DN4879_c0_g1_i1	FvH4_1g14420.1	100	1e-21	94.4	CASP-like protein ARALYDRAFT_485429 isoform X2 [Fragaria vesca subsp. vesca]
TRINITY_DN89_c0_g2	TRINITY_DN89_c0_g2_i3	FvH4_5g25260.1	100	0	876	catalase isozyme 1 [Fragaria vesca subsp. vesca]
TRINITY_DN10946_c0_g2	TRINITY_DN10946_c0_g2_i2	FvH4_6g05530.1	100	0	740	cation/calcium exchanger 5, partial [Fragaria vesca subsp. vesca]
TRINITY_DN4890_c0_g11	TRINITY_DN4890_c0_g1_i11	FvH4_1g28560.1	100	8e-136	437	cationic amino acid transporter 2, vacuolar-like [Fragaria vesca subsp. vesca]
TRINITY_DN9536_c0_g1	TRINITY_DN9536_c0_g1_i1	FvH4_3g16770.1	100	0	1075	cationic amino acid transporter 8, vacuolar [Fragaria vesca subsp. vesca]
TRINITY_DN11221_c1_g3	TRINITY_DN11221_c1_g3_i1	FvH4_3g40140.1	100	1e-140	400	cationic peroxidase 1-like [Fragaria vesca subsp. vesca]
TRINITY_DN3430_c0_g1	TRINITY_DN3430_c0_g1_i1	FvH4_6g10210.1	100	0	875	CBL-interacting protein kinase 2-like [Fragaria vesca subsp. vesca]
TRINITY_DN20584_c0_g2	TRINITY_DN20584_c0_g2_i2	FvH4_3g40220.1	100	0	807	CBL-interacting serine/threonine-protein kinase 10 [Fragaria vesca subsp. vesca]
TRINITY_DN12460_c1_g1	TRINITY_DN12460_c1_g1_i1	FvH4_6g10160.1	100	0	875	CBL-interacting serine/threonine-protein kinase 14-like [Fragaria vesca subsp. vesca]
TRINITY_DN2926_c0_g1	TRINITY_DN2926_c0_g1_i3	FvH4_4g02010.1	100	0	741	CBL-interacting serine/threonine-protein kinase 4 [Fragaria vesca subsp. vesca]
TRINITY_DN12734_c0_g1	TRINITY_DN12734_c0_g1_i1	FvH4_2g41050.1	100	0	892	CBL-interacting serine/threonine-protein kinase 5 [Fragaria vesca subsp. vesca]
TRINITY_DN12460_c0_g1	TRINITY_DN12460_c0_g1_i2	FvH4_1g01070.1	100	0	783	CBL-interacting serine/threonine-protein kinase 6 [Fragaria vesca subsp. vesca]
TRINITY_DN1815_c0_g1	TRINITY_DN1815_c0_g1_i1	FvH4_1g16360.1	100	1e-60	202	CBS domain-containing protein CBSX1, chloroplastic [Fragaria vesca subsp. vesca]
TRINITY_DN4975_c0_g2	TRINITY_DN4975_c0_g2_i1	FvH4_2g05710.1	100	5e-87	270	CBS domain-containing protein CBSX2, chloroplastic-like [Fragaria vesca subsp. vesca]
TRINITY_DN27073_c0_g1	TRINITY_DN27073_c0_g1_i1	FvH4_2g39650.1	100	5e-143	414	CBS domain-containing protein CBSX3, mitochondrial [Fragaria vesca subsp. vesca]
TRINITY_DN8913_c0_g1	TRINITY_DN8913_c0_g1_i1	FvH4_3g04900.1	100	1e-176	513	CBS domain-containing protein CBSX5-like [Fragaria vesca subsp. vesca]
TRINITY_DN6904_c1_g1	TRINITY_DN6904_c1_g1_i3	FvH4_6g00690.1	100	2e-177	518	CBS domain-containing protein CBSX6 [Fragaria vesca subsp. vesca]<>CBS domain-containing protein CBSX6 [Fragaria vesca subsp. vesca]
TRINITY_DN468_c2_g1	TRINITY_DN468_c2_g1_i2	FvH4_5g20280.1	100	0	904	CCR4-NOT transcription complex subunit 11 [Fragaria vesca subsp. vesca]
TRINITY_DN26729_c0_g1	TRINITY_DN26729_c0_g1_i1	FvH4_1g12320.1	100	0	1185	CDK5RAP1-like protein [Fragaria vesca subsp. vesca]
TRINITY_DN804_c8_g1	TRINITY_DN804_c8_g1_i4	FvH4_6g22670.1	100	0	713	CDK5RAP3-like protein [Fragaria vesca subsp. vesca]
TRINITY_DN27963_c0_g1	TRINITY_DN27963_c0_g1_i1	FvH4_5g16370.1	100	7e-58	184	CDP-diacylglycerol-glycerol-3-phosphate 3-phosphatidyltransferase
TRINITY_DN9781_c0_g4	TRINITY_DN9781_c0_g4_i2	FvH4_1g15620.1	100	0	1158	CDPK-related kinase 5 [Fragaria vesca subsp. vesca]
TRINITY_DN9618_c0_g1	TRINITY_DN9618_c0_g1_i2	FvH4_5g18520.1	100	0	1078	CDT1-like protein a, chloroplastic [Fragaria vesca subsp. vesca]
TRINITY_DN7145_c0_g10	TRINITY_DN7145_c0_g1_i10	FvH4_1g11470.1	100	0	1116	cell cycle checkpoint protein RAD17 [Fragaria vesca subsp. vesca]
TRINITY_DN281_c1_g1	TRINITY_DN281_c1_g1_i2	FvH4_3g23230.1	100	0	610	cell differentiation protein RCD1 homolog [Fragaria vesca subsp. vesca]
TRINITY_DN304641_c0_g1	TRINITY_DN304641_c0_g1_i1	FvH4_5g25230.1	100	3e-50	161	cell division control protein 2 homolog [Rosa chinensis]
TRINITY_DN5962_c0_g1	TRINITY_DN5962_c0_g1_i3	FvH4_2g18640.1	100	0	1127	cell division control protein 45 homolog [Fragaria vesca subsp. vesca]
TRINITY_DN4437_c0_g1	TRINITY_DN4437_c0_g1_i1	FvH4_7g32500.1	100	0	979	cell division control protein 48-like [Fragaria vesca subsp. vesca]
TRINITY_DN8140_c0_g1	TRINITY_DN8140_c0_g1_i1	FvH4_7g26510.1	100	0	941	cell division cycle 20.4, cofactor of APC complex-like [Fragaria vesca subsp. vesca]
TRINITY_DN61177_c0_g1	TRINITY_DN61177_c0_g1_i1	FvH4_1g05910.1	100	0	1499	cell division cycle protein 27 homolog B isoform X1 [Fragaria vesca subsp. vesca]
TRINITY_DN14480_c0_g1	TRINITY_DN14480_c0_g1_i1	FvH4_5g05770.1	100	0	1556	cell division cycle protein 48 homolog [Fragaria vesca subsp. vesca]
TRINITY_DN109152_c0_g1	TRINITY_DN109152_c0_g1_i2	FvH4_4g04060.1	100	2e-32	117	cell number regulator 10-like [Prunus avium]
TRINITY_DN124230_c0_g1	TRINITY_DN124230_c0_g1_i1	FvH4_7g10490.1	100	1e-78	237	cell number regulator 6 [Fragaria vesca subsp. vesca]
TRINITY_DN12631_c0_g1	TRINITY_DN12631_c0_g1_i2	FvH4_7g27460.1	100	4e-97	305	cell number regulator 6 [Fragaria vesca subsp. vesca]
TRINITY_DN23220_c0_g1	TRINITY_DN23220_c0_g1_i1	FvH4_4g20180.1	100	5e-96	295	cell wall / vacuolar inhibitor of fructosidase 1
TRINITY_DN174895_c0_g1	TRINITY_DN174895_c0_g1_i1	FvH4_5g04330.1	100	9e-109	311	cell wall / vacuolar inhibitor of fructosidase 1 [Fragaria vesca subsp. vesca]
TRINITY_DN339641_c0_g1	TRINITY_DN339641_c0_g1_i1	FvH4_4g24920.1	100	4e-120	342	cell wall / vacuolar inhibitor of fructosidase 1-like \\ 1.30E-06 \\ 77.78 %
TRINITY_DN704_c1_g1	TRINITY_DN704_c1_g1_i1	FvH4_1g24160.1	100	2e-110	328	cell wall / vacuolar inhibitor of fructosidase 2 [Fragaria vesca subsp. vesca]
TRINITY_DN3356_c4_g1	TRINITY_DN3356_c4_g1_i1	FvH4_7g01100.1	100	0	2120	cellulose synthase A catalytic subunit 3 [UDP-forming] [Fragaria vesca subsp. vesca]
TRINITY_DN15415_c0_g1	TRINITY_DN15415_c0_g1_i1	FvH4_c1g00730.1	100	1e-47	159	cellulose synthase-like protein D3 [Fragaria vesca subsp. vesca]
TRINITY_DN11178_c0_g1	TRINITY_DN11178_c0_g1_i2	FvH4_7g29150.1	100	1e-122	355	CEN-like protein 1 [Fragaria vesca subsp. vesca]<>terminal flower 1 [Fragaria x ananassa]<>CENTRORADIALIS-like1 [Fragaria x ananassa]
TRINITY_DN41452_c0_g1	TRINITY_DN41452_c0_g1_i1	FvH4_3g24700.1	100	1e-125	357	CEN-like protein 2 [Fragaria vesca subsp. vesca]<>CENTRORADIALIS-like2 [Fragaria x ananassa]
TRINITY_DN8824_c0_g1	TRINITY_DN8824_c0_g1_i4	FvH4_2g36790.1	100	5e-145	448	centromere protein O [Fragaria vesca subsp. vesca]
TRINITY_DN7468_c0_g1	TRINITY_DN7468_c0_g1_i3	FvH4_7g27040.1	100	0	1137	ceramide kinase isoform X1 [Fragaria vesca subsp. vesca]
TRINITY_DN14831_c0_g3	TRINITY_DN14831_c0_g3_i1	FvH4_3g09960.1	100	3e-147	418	ceramide-1-phosphate transfer protein [Fragaria vesca subsp. vesca]
TRINITY_DN3467_c0_g1	TRINITY_DN3467_c0_g1_i1	FvH4_3g04160.1	100	6e-124	382	CFE protein
TRINITY_DN2_c0_g1	TRINITY_DN2_c0_g1_i2	FvH4_5g14020.1	100	0	1730	chaperone protein ClpB1 [Fragaria vesca subsp. vesca]
TRINITY_DN2481_c0_g2	TRINITY_DN2481_c0_g2_i1	FvH4_4g09820.1	100	0	1945	chaperone protein ClpB1 [Fragaria vesca subsp. vesca]
TRINITY_DN853_c0_g4	TRINITY_DN853_c0_g4_i1	FvH4_6g47410.1	100	0	1950	chaperone protein ClpB3, chloroplastic isoform X1 [Fragaria vesca subsp. vesca]
TRINITY_DN853_c0_g2	TRINITY_DN853_c0_g2_i1	FvH4_2g40970.1	100	0	1611	chaperone protein ClpB3, mitochondrial [Fragaria vesca subsp. vesca]
TRINITY_DN10625_c0_g1	TRINITY_DN10625_c0_g1_i2	FvH4_5g10020.1	100	0	1153	chaperone protein ClpD, chloroplastic [Fragaria vesca subsp. vesca]
TRINITY_DN31923_c0_g1	TRINITY_DN31923_c0_g1_i1	FvH4_2g01600.1	100	1e-67	207	chaperone protein dnaJ 11, chloroplastic-like [Fragaria vesca subsp. vesca]
TRINITY_DN279_c0_g1	TRINITY_DN279_c0_g1_i4	FvH4_4g27000.1	100	0	780	chaperone protein dnaJ 15-like [Fragaria vesca subsp. vesca]
TRINITY_DN185863_c0_g1	TRINITY_DN185863_c0_g1_i1	FvH4_1g21470.1	100	5e-120	340	chaperone protein dnaJ 20, chloroplastic-like [Fragaria vesca subsp. vesca]
TRINITY_DN12898_c0_g1	TRINITY_DN12898_c0_g1_i1	FvH4_4g18330.1	100	0	585	chaperone protein dnaJ 49 [Fragaria vesca subsp. vesca]
TRINITY_DN1594_c0_g1	TRINITY_DN1594_c0_g1_i2	FvH4_1g03490.1	100	0	620	chaperone protein dnaJ 49-like [Fragaria vesca subsp. vesca]
TRINITY_DN288_c4_g1	TRINITY_DN288_c4_g1_i1	FvH4_5g27800.1	100	0	560	chaperone protein dnaJ 6 [Fragaria vesca subsp. vesca]
TRINITY_DN9943_c0_g1	TRINITY_DN9943_c0_g1_i4	FvH4_6g51170.1	100	1e-107	324	chaperone protein dnaJ C76, chloroplastic-like isoform X1 [Rosa chinensis]<>putative DnaJ domain-containing protein [Rosa chinensis]
TRINITY_DN36_c0_g1	TRINITY_DN36_c0_g1_i1	FvH4_6g33450.1	100	0	1058	chaperonin CPN60-like 2, mitochondrial [Fragaria vesca subsp. vesca]
TRINITY_DN154972_c0_g1	TRINITY_DN154972_c0_g1_i1	FvH4_3g28850.1	100	1e-162	463	chaperonin-like RbcX protein 2, chloroplastic
TRINITY_DN295150_c0_g1	TRINITY_DN295150_c0_g1_i1	FvH4_6g32870.1	100	4e-125	368	charged multivesicular body protein 1-like [Fragaria vesca subsp. vesca]
TRINITY_DN8534_c0_g1	TRINITY_DN8534_c0_g1_i7	FvH4_7g05380.1	100	2e-81	266	charged multivesicular body protein 5-like [Fragaria vesca subsp. vesca]
TRINITY_DN13393_c0_g2	TRINITY_DN13393_c0_g2_i6	FvH4_6g42640.1	100	0	766	chitin elicitor receptor kinase 1-like [Fragaria vesca subsp. vesca]
TRINITY_DN14013_c0_g1	TRINITY_DN14013_c0_g1_i1	FvH4_1g26180.1	100	0	545	chitinase 10 [Fragaria vesca subsp. vesca]
TRINITY_DN232178_c0_g1	TRINITY_DN232178_c0_g1_i1	FvH4_5g27250.1	100	0	582	chitinase 10-like [Fragaria vesca subsp. vesca]
TRINITY_DN202340_c0_g1	TRINITY_DN202340_c0_g1_i1	FvH4_3g34320.1	100	0	581	chitinase 2-like [Fragaria vesca subsp. vesca]<>chitinase 2-like protein [Fragaria nilgerrensis]
TRINITY_DN47691_c0_g2	TRINITY_DN47691_c0_g2_i1	FvH4_1g24210.1	100	1e-111	324	chitinase 2-like [Rosa chinensis]<>putative chitinase [Rosa chinensis]
TRINITY_DN216996_c0_g1	TRINITY_DN216996_c0_g1_i1	FvH4_2g13670.1	100	1e-58	184	chitinase, partial [Entamoeba dispar]
TRINITY_DN5022_c0_g1	TRINITY_DN5022_c0_g1_i2	FvH4_4g11930.1	100	8e-88	288	chitinase-like protein 1 [Fragaria vesca subsp. vesca]
TRINITY_DN10505_c0_g1	TRINITY_DN10505_c0_g1_i2	FvH4_7g28050.1	100	2e-134	405	chloride conductance regulatory protein ICln [Fragaria vesca subsp. vesca]<>chloride conductance regulatory protein ICln [Fragaria vesca subsp. vesca]<>chloride conductance regulatory protein ICln [Fragaria vesca subsp. vesca]<>chloride conductance regulatory protein ICln [Fragaria vesca subsp. vesca]
TRINITY_DN12847_c1_g1	TRINITY_DN12847_c1_g1_i1	FvH4_3g21360.1	100	2e-38	127	chloride conductance regulatory protein ICln [Fragaria vesca subsp. vesca]<>chloride conductance regulatory protein ICln [Fragaria vesca subsp. vesca]<>chloride conductance regulatory protein ICln [Fragaria vesca subsp. vesca]<>chloride conductance regulatory protein ICln [Fragaria vesca subsp. vesca]
TRINITY_DN11027_c0_g1	TRINITY_DN11027_c0_g1_i1	FvH4_7g19750.1	100	6e-169	476	chlorophyll a-b binding protein 6, chloroplastic [Fragaria vesca subsp. vesca]
TRINITY_DN169026_c0_g1	TRINITY_DN169026_c0_g1_i1	FvH4_6g40150.1	100	0	529	chlorophyll a-b binding protein 8, chloroplastic [Fragaria vesca subsp. vesca]
TRINITY_DN198714_c0_g1	TRINITY_DN198714_c0_g1_i1	FvH4_5g30940.1	100	2e-159	453	chlorophyll a-b binding protein CP24 10A, chloroplastic [Fragaria vesca subsp. vesca]
TRINITY_DN171768_c0_g1	TRINITY_DN171768_c0_g1_i1	FvH4_3g17050.1	100	2e-170	484	chlorophyll a-b binding protein CP26, chloroplastic [Fragaria vesca subsp. vesca]
TRINITY_DN1385_c0_g1	TRINITY_DN1385_c0_g1_i5	FvH4_6g11540.1	100	0	540	chlorophyll a-b binding protein CP29.2, chloroplastic [Fragaria vesca subsp. vesca]
TRINITY_DN2711_c0_g1	TRINITY_DN2711_c0_g1_i8	FvH4_5g14770.1	100	2e-173	513	chlorophyll a-b binding protein P4, chloroplastic [Fragaria vesca subsp. vesca]
TRINITY_DN42336_c0_g1	TRINITY_DN42336_c0_g1_i2	FvH4_2g23050.1	100	0	592	chlorophyllase-1 [Fragaria vesca subsp. vesca]
TRINITY_DN23159_c0_g2	TRINITY_DN23159_c0_g2_i2	FvH4_4g00030.1	100	1e-55	171	chlorophyllase-2, chloroplastic [Fragaria vesca subsp. vesca]<>chlorophyllase-2, chloroplastic [Fragaria vesca subsp. vesca]<>chlorophyllase-2, chloroplastic [Fragaria vesca subsp. vesca]<>chlorophyllase-2, chloroplastic [Fragaria vesca subsp. vesca]
TRINITY_DN30164_c0_g1	TRINITY_DN30164_c0_g1_i1	FvH4_4g00040.1	100	2e-70	214	chlorophyllase-2, chloroplastic [Fragaria vesca subsp. vesca]<>chlorophyllase-2, chloroplastic [Fragaria vesca subsp. vesca]<>chlorophyllase-2, chloroplastic [Fragaria vesca subsp. vesca]<>chlorophyllase-2, chloroplastic [Fragaria vesca subsp. vesca]
TRINITY_DN1987_c0_g1	TRINITY_DN1987_c0_g1_i4	FvH4_2g27000.1	100	0	1028	chlorophyllide a oxygenase, chloroplastic [Fragaria vesca subsp. vesca]
TRINITY_DN12459_c0_g1	TRINITY_DN12459_c0_g1_i1	FvH4_4g00180.1	100	0	721	chloroplast envelope membrane protein [Fragaria vesca subsp. vesca]<>chloroplast envelope membrane protein [Fragaria vesca subsp. vesca]
TRINITY_DN7953_c0_g1	TRINITY_DN7953_c0_g1_i2	FvH4_3g28120.1	100	0	1576	chloroplastic group IIA intron splicing facilitator CRS1, chloroplastic-like [Fragaria vesca subsp. vesca]
TRINITY_DN6971_c0_g2	TRINITY_DN6971_c0_g2_i7	FvH4_5g29670.1	100	0	570	chloroplastic group IIB intron splicing facilitator CRS2-B, chloroplastic-like [Fragaria vesca subsp. vesca]
TRINITY_DN24172_c0_g1	TRINITY_DN24172_c0_g1_i1	FvH4_3g26950.1	100	7e-80	240	chlororespiratory reduction 42 \\ 3.70E-87 \\ 85.73 %
TRINITY_DN7818_c0_g1	TRINITY_DN7818_c0_g1_i5	FvH4_4g06930.1	100	0	846	choline monooxygenase, chloroplastic isoform X2 [Fragaria vesca subsp. vesca]
TRINITY_DN29796_c0_g2	TRINITY_DN29796_c0_g2_i1	FvH4_3g20420.1	100	4e-155	489	choline transporter-like protein 2 [Fragaria vesca subsp. vesca]
TRINITY_DN1472_c0_g1	TRINITY_DN1472_c0_g1_i3	FvH4_3g12780.1	100	0	543	choline-phosphate cytidylyltransferase 1-like [Fragaria vesca subsp. vesca]
TRINITY_DN22798_c0_g1	TRINITY_DN22798_c0_g1_i1	FvH4_4g30560.1	100	0	642	chorismate mutase 3, chloroplastic [Fragaria vesca subsp. vesca]
TRINITY_DN63_c0_g3	TRINITY_DN63_c0_g3_i1	FvH4_6g15510.1	100	6e-125	371	chromo domain-containing protein cec-1 [Fragaria vesca subsp. vesca]
TRINITY_DN17343_c0_g1	TRINITY_DN17343_c0_g1_i1	FvH4_5g36590.1	100	2e-97	291	chromodomain-helicase-DNA-binding protein 9-like
TRINITY_DN19088_c0_g1	TRINITY_DN19088_c0_g1_i2	FvH4_5g09710.1	100	2e-178	503	chromophore lyase CRL, chloroplastic [Fragaria vesca subsp. vesca]
TRINITY_DN10328_c0_g1	TRINITY_DN10328_c0_g1_i2	FvH4_3g28750.1	100	9e-84	193	Chromosome partition protein like
TRINITY_DN2237_c2_g2	TRINITY_DN2237_c2_g2_i2	FvH4_6g28680.1	100	0	626	cinnamoyl-CoA reductase 1-like [Fragaria vesca subsp. vesca]
TRINITY_DN2330_c0_g1	TRINITY_DN2330_c0_g1_i4	FvH4_7g01590.1	100	0	630	cinnamoyl-CoA reductase 1-like [Fragaria vesca subsp. vesca]
TRINITY_DN5910_c0_g1	TRINITY_DN5910_c0_g1_i8	FvH4_5g26030.1	100	0	542	cinnamoyl-CoA reductase 2-like [Fragaria vesca subsp. vesca]
TRINITY_DN1105_c0_g1	TRINITY_DN1105_c0_g1_i3	FvH4_6g15730.1	100	9e-32	106	cinnamyl alcohol dehydrogenase 8-like
TRINITY_DN2888_c0_g1	TRINITY_DN2888_c0_g1_i3	FvH4_7g10280.1	100	7e-147	441	circumsporozoite protein-like [Fragaria vesca subsp. vesca]
TRINITY_DN123065_c0_g1	TRINITY_DN123065_c0_g1_i1	FvH4_2g13510.1	100	1e-119	341	citrate-binding protein-like [Fragaria vesca subsp. vesca]
TRINITY_DN4909_c0_g1	TRINITY_DN4909_c0_g1_i3	FvH4_4g28230.1	100	0	643	clavaminate synthase-like protein At3g21360 [Fragaria vesca subsp. vesca]
TRINITY_DN11251_c0_g1	TRINITY_DN11251_c0_g1_i1	FvH4_4g28190.1	100	5e-77	235	CLAVATA3/ESR (CLE)-related protein 12
TRINITY_DN6591_c0_g1	TRINITY_DN6591_c0_g1_i1	FvH4_6g49680.1	100	2e-39	144	CLAVATA3/ESR (CLE)-related protein 25 [Fragaria vesca subsp. vesca]
TRINITY_DN8630_c0_g2	TRINITY_DN8630_c0_g2_i1	FvH4_4g35400.1	100	8e-48	162	CLAVATA3/ESR (CLE)-related protein 25 [Fragaria vesca subsp. vesca]
TRINITY_DN239762_c0_g1	TRINITY_DN239762_c0_g1_i1	FvH4_3g18710.1	100	5e-42	140	CLAVATA3/ESR (CLE)-related protein 4-like
TRINITY_DN5346_c1_g1	TRINITY_DN5346_c1_g1_i1	FvH4_2g19210.1	100	1e-50	176	CLAVATA3/ESR (CLE)-related protein TDIF-like [Fragaria vesca subsp. vesca]
TRINITY_DN6418_c0_g2	TRINITY_DN6418_c0_g2_i6	FvH4_7g28210.1	100	0	2422	cleavage and polyadenylation specificity factor subunit 1 [Fragaria vesca subsp. vesca]
TRINITY_DN18507_c0_g1	TRINITY_DN18507_c0_g1_i1	FvH4_2g01740.1	100	1e-87	279	cleavage and polyadenylation specificity factor subunit 6 [Fragaria vesca subsp. vesca]
TRINITY_DN1015_c0_g1	TRINITY_DN1015_c0_g1_i2	FvH4_4g25170.1	100	0	668	cleavage and polyadenylation specificity factor subunit CG7185 [Fragaria vesca subsp. vesca]
TRINITY_DN5163_c0_g1	TRINITY_DN5163_c0_g1_i1	FvH4_6g23390.1	100	2e-143	413	cleavage stimulating factor 64-like [Fragaria vesca subsp. vesca]
TRINITY_DN4452_c0_g12	TRINITY_DN4452_c0_g1_i12	FvH4_5g27050.1	100	0	1206	cleavage stimulation factor subunit 77 isoform X1 [Fragaria vesca subsp. vesca]
TRINITY_DN18379_c0_g1	TRINITY_DN18379_c0_g1_i1	FvH4_2g38210.1	100	3e-83	260	clock-controlled protein 8 [Fragaria vesca subsp. vesca]
TRINITY_DN10480_c0_g3	TRINITY_DN10480_c0_g3_i2	FvH4_7g00050.1	100	1e-117	351	clp protease-related protein At4g12060, chloroplastic [Fragaria vesca subsp. vesca]
TRINITY_DN11550_c0_g1	TRINITY_DN11550_c0_g1_i2	FvH4_4g12380.1	100	0	2085	clustered mitochondria protein [Fragaria vesca subsp. vesca]
TRINITY_DN10717_c0_g1	TRINITY_DN10717_c0_g1_i1	FvH4_5g03970.1	100	0	671	CMP-sialic acid transporter 1 [Fragaria vesca subsp. vesca]
TRINITY_DN7693_c0_g1	TRINITY_DN7693_c0_g1_i5	FvH4_4g11380.1	100	0	697	CMP-sialic acid transporter 2 [Fragaria vesca subsp. vesca]
TRINITY_DN3297_c0_g1	TRINITY_DN3297_c0_g1_i4	FvH4_2g16930.1	100	0	650	CMP-sialic acid transporter 4 [Fragaria vesca subsp. vesca]
TRINITY_DN446_c0_g2	TRINITY_DN446_c0_g2_i1	FvH4_5g06080.1	100	0	1235	Coatomer beta subunit
TRINITY_DN1330_c1_g1	TRINITY_DN1330_c1_g1_i6	FvH4_5g12340.1	100	0	2403	coatomer subunit alpha-1-like [Fragaria vesca subsp. vesca]
TRINITY_DN78_c0_g1	TRINITY_DN78_c0_g1_i1	FvH4_6g31020.1	100	0	632	coatomer subunit beta'-1-like isoform X2 [Fragaria vesca subsp. vesca]
TRINITY_DN288_c0_g1	TRINITY_DN288_c0_g1_i4	FvH4_1g05170.1	100	0	1786	coatomer subunit beta'-3-like [Fragaria vesca subsp. vesca]
TRINITY_DN11614_c0_g1	TRINITY_DN11614_c0_g1_i1	FvH4_3g11400.1	100	2e-170	492	coatomer subunit epsilon-1 [Fragaria vesca subsp. vesca]
TRINITY_DN29265_c0_g1	TRINITY_DN29265_c0_g1_i1	FvH4_6g46470.1	100	0	884	COBRA-like protein 4 [Fragaria vesca subsp. vesca]
TRINITY_DN140839_c0_g1	TRINITY_DN140839_c0_g1_i1	FvH4_5g28720.1	100	0	761	COBRA-like protein 6 [Fragaria vesca subsp. vesca]
TRINITY_DN2581_c0_g1	TRINITY_DN2581_c0_g1_i4	FvH4_2g34410.1	100	0	519	coenzyme Q-binding protein COQ10 homolog, mitochondrial [Fragaria vesca subsp. vesca]
TRINITY_DN2237_c1_g1	TRINITY_DN2237_c1_g1_i1	FvH4_2g15950.1	100	7e-80	256	coiled-coil domain-containing protein 124 [Fragaria vesca subsp. vesca]<>coiled-coil domain-containing protein 124 [Fragaria vesca subsp. vesca]<>coiled-coil domain-containing protein 124 [Fragaria vesca subsp. vesca]
TRINITY_DN8067_c0_g2	TRINITY_DN8067_c0_g2_i2	FvH4_4g28180.1	100	0	588	coiled-coil domain-containing protein 130-like [Fragaria vesca subsp. vesca]
TRINITY_DN3808_c1_g1	TRINITY_DN3808_c1_g1_i4	FvH4_3g16590.1	100	3e-127	391	coiled-coil domain-containing protein 94 homolog [Fragaria vesca subsp. vesca]
TRINITY_DN8514_c0_g1	TRINITY_DN8514_c0_g1_i5	FvH4_3g26410.1	100	1e-125	395	coiled-coil domain-containing protein R3HCC1L isoform X2 [Fragaria vesca subsp. vesca]
TRINITY_DN8980_c0_g1	TRINITY_DN8980_c0_g1_i2	FvH4_4g25440.1	100	0	1224	coilin [Fragaria vesca subsp. vesca]
TRINITY_DN665_c0_g1	TRINITY_DN665_c0_g1_i6	FvH4_3g06340.1	100	4e-118	368	cold-regulated 413 inner membrane protein 2, chloroplastic-like isoform X2 [Fragaria vesca subsp. vesca]
TRINITY_DN122_c0_g2	TRINITY_DN122_c0_g2_i1	FvH4_2g32700.1	100	5e-58	181	cold-regulated protein
TRINITY_DN8540_c0_g1	TRINITY_DN8540_c0_g1_i1	FvH4_5g34870.1	100	2e-93	299	collagen alpha-1(VIII) chain [Fragaria vesca subsp. vesca]
TRINITY_DN6848_c0_g1	TRINITY_DN6848_c0_g1_i2	FvH4_7g15810.1	100	2e-147	453	common plant regulatory factor 1-like [Fragaria vesca subsp. vesca]
TRINITY_DN6437_c0_g12	TRINITY_DN6437_c0_g1_i12	FvH4_5g03860.1	100	4e-58	173	common plant regulatory factor 1-like [Fragaria vesca subsp. vesca]<>common plant regulatory factor 1-like [Fragaria vesca subsp. vesca]<>common plant regulatory factor 1-like [Fragaria vesca subsp. vesca]<>common plant regulatory factor 1-like [Fragaria vesca subsp. vesca]
TRINITY_DN5491_c0_g1	TRINITY_DN5491_c0_g1_i1	FvH4_1g18760.1	100	0	619	COMPASS-like H3K4 histone methylase component WDR5A [Fragaria vesca subsp. vesca]
TRINITY_DN11166_c0_g1	TRINITY_DN11166_c0_g1_i1	FvH4_7g02030.1	100	0	784	COMPASS-like H3K4 histone methylase component WDR5B [Fragaria vesca subsp. vesca]
TRINITY_DN7187_c0_g1	TRINITY_DN7187_c0_g1_i1	FvH4_5g19910.1	100	1e-24	93.2	component of cytosolic 80S ribosome and 60S large subunit, partial [Dunaliella salina]
TRINITY_DN12639_c0_g1	TRINITY_DN12639_c0_g1_i5	FvH4_1g30230.1	100	0	894	condensin complex subunit 3 isoform X3 [Fragaria vesca subsp. vesca]
TRINITY_DN796_c0_g1	TRINITY_DN796_c0_g1_i1	FvH4_4g18640.1	100	0	1313	condensin-2 complex subunit H2 [Fragaria vesca subsp. vesca]
TRINITY_DN18962_c0_g1	TRINITY_DN18962_c0_g1_i6	FvH4_2g37280.1	100	0	1315	conserved oligomeric Golgi complex subunit 6 [Fragaria vesca subsp. vesca]
TRINITY_DN6161_c0_g1	TRINITY_DN6161_c0_g1_i1	FvH4_7g26360.1	100	0	1972	COP1-interacting protein 7-like isoform X1 [Rosa chinensis]<>hypothetical protein RchiOBHm_Chr1g0372921 [Rosa chinensis]
TRINITY_DN12887_c0_g1	TRINITY_DN12887_c0_g1_i1	FvH4_5g19860.1	100	2e-176	511	COP9 signalosome complex subunit 7-like isoform X2 [Fragaria vesca subsp. vesca]
TRINITY_DN3495_c0_g1	TRINITY_DN3495_c0_g1_i1	FvH4_5g24910.1	100	3e-53	171	copper amine oxidase family protein
TRINITY_DN16963_c0_g1	TRINITY_DN16963_c0_g1_i1	FvH4_7g33050.1	100	1e-55	185	copper transport protein ATX1 [Fragaria vesca subsp. vesca]
TRINITY_DN13824_c0_g2	TRINITY_DN13824_c0_g2_i1	FvH4_2g14710.1	100	2e-54	169	copper transport protein CCH-like [Fragaria vesca subsp. vesca]
TRINITY_DN204734_c0_g1	TRINITY_DN204734_c0_g1_i1	FvH4_3g37240.1	100	8e-89	261	copper transporter 1-like [Fragaria vesca subsp. vesca]
TRINITY_DN8861_c0_g1	TRINITY_DN8861_c0_g1_i2	FvH4_6g39170.1	100	4e-172	497	coproporphyrinogen-III oxidase 1, chloroplastic [Fragaria vesca subsp. vesca]
TRINITY_DN1859_c0_g1	TRINITY_DN1859_c0_g1_i1	FvH4_2g11550.1	100	3e-38	140	costars family protein [Fragaria vesca subsp. vesca]
TRINITY_DN75745_c0_g1	TRINITY_DN75745_c0_g1_i1	FvH4_4g03670.1	100	6e-132	381	cotton fiber protein
TRINITY_DN9559_c0_g1	TRINITY_DN9559_c0_g1_i3	FvH4_3g02570.1	100	3e-57	191	CRIB domain-containing protein RIC10 [Fragaria vesca subsp. vesca]
TRINITY_DN17471_c0_g2	TRINITY_DN17471_c0_g2_i1	FvH4_4g12280.1	100	2e-54	187	CRIB domain-containing protein RIC4-like [Fragaria vesca subsp. vesca]
TRINITY_DN2622_c0_g1	TRINITY_DN2622_c0_g1_i1	FvH4_4g13000.1	100	0	932	crocetin glucosyltransferase, chloroplastic-like [Fragaria vesca subsp. vesca]
TRINITY_DN4359_c0_g11	TRINITY_DN4359_c0_g1_i11	FvH4_7g22830.1	100	5e-164	498	crocetin glucosyltransferase, chloroplastic-like [Fragaria vesca subsp. vesca]
TRINITY_DN1980_c0_g5	TRINITY_DN1980_c0_g5_i2	FvH4_5g04070.1	100	0	1349	crooked neck-like protein 1 [Fragaria vesca subsp. vesca]
TRINITY_DN314_c0_g1	TRINITY_DN314_c0_g1_i2	FvH4_1g23210.1	100	0	981	crossover junction endonuclease EME1B-like isoform X1 [Fragaria vesca subsp. vesca]
TRINITY_DN2342_c0_g1	TRINITY_DN2342_c0_g1_i5	FvH4_7g02220.1	100	0	1312	crossover junction endonuclease MUS81 [Fragaria vesca subsp. vesca]
TRINITY_DN2623_c1_g1	TRINITY_DN2623_c1_g1_i4	FvH4_5g37290.1	100	0	787	cryptochrome-1 isoform X1
TRINITY_DN7419_c0_g1	TRINITY_DN7419_c0_g1_i1	FvH4_4g30740.1	100	0	1268	CSC1-like protein At1g69450 [Fragaria vesca subsp. vesca]
TRINITY_DN7833_c0_g1	TRINITY_DN7833_c0_g1_i5	FvH4_3g04980.1	100	0	1301	CSC1-like protein ERD4 [Fragaria vesca subsp. vesca]
TRINITY_DN8389_c0_g3	TRINITY_DN8389_c0_g3_i1	FvH4_4g23810.1	100	0	879	CTD small phosphatase-like protein 2 [Fragaria vesca subsp. vesca]<>CTD small phosphatase-like protein 2 [Fragaria vesca subsp. vesca]
TRINITY_DN1769_c2_g2	TRINITY_DN1769_c2_g2_i1	FvH4_7g15170.1	100	0	580	C-terminal binding protein AN [Fragaria vesca subsp. vesca]
TRINITY_DN10091_c0_g1	TRINITY_DN10091_c0_g1_i2	FvH4_4g27760.1	100	8e-167	505	CTL-like protein DDB_G0274487 [Fragaria vesca subsp. vesca]
TRINITY_DN3348_c0_g2	TRINITY_DN3348_c0_g2_i2	FvH4_3g13560.1	100	0	1102	CTP synthase-like [Fragaria vesca subsp. vesca]
TRINITY_DN12484_c0_g1	TRINITY_DN12484_c0_g1_i1	FvH4_1g02870.1	100	3e-85	256	cucumber peeling cupredoxin-like
TRINITY_DN7615_c0_g1	TRINITY_DN7615_c0_g1_i1	FvH4_7g12470.1	100	2e-90	277	cucumber peeling cupredoxin-like [Fragaria vesca subsp. vesca]
TRINITY_DN30975_c0_g1	TRINITY_DN30975_c0_g1_i2	FvH4_3g17070.1	100	0	645	cullin-1-like [Fragaria vesca subsp. vesca]
TRINITY_DN7643_c0_g1	TRINITY_DN7643_c0_g1_i2	FvH4_4g31500.1	100	0	1523	cullin-3A [Fragaria vesca subsp. vesca]
TRINITY_DN4530_c0_g1	TRINITY_DN4530_c0_g1_i1	FvH4_6g48910.1	100	0	1452	cullin-3A-like [Fragaria vesca subsp. vesca]
TRINITY_DN15017_c0_g2	TRINITY_DN15017_c0_g2_i1	FvH4_3g05480.1	100	0	1546	cullin-4 [Fragaria vesca subsp. vesca]
TRINITY_DN1487_c1_g1	TRINITY_DN1487_c1_g1_i1	FvH4_2g08710.1	100	0	828	cyclase-associated protein 1 [Fragaria vesca subsp. vesca]
TRINITY_DN622_c0_g1	TRINITY_DN622_c0_g1_i1	FvH4_6g48270.1	100	0	924	cyclic dof factor 2 [Fragaria vesca subsp. vesca]
TRINITY_DN6231_c1_g1	TRINITY_DN6231_c1_g1_i1	FvH4_4g31210.1	100	0	939	cyclic dof factor 3 [Fragaria vesca subsp. vesca]
TRINITY_DN4065_c0_g1	TRINITY_DN4065_c0_g1_i1	FvH4_7g31200.1	100	0	1409	cyclic nucleotide-gated ion channel 1-like [Fragaria vesca subsp. vesca]
TRINITY_DN609_c1_g1	TRINITY_DN609_c1_g1_i1	FvH4_4g04180.1	100	0	1321	cyclic nucleotide-gated ion channel 1-like [Fragaria vesca subsp. vesca]
TRINITY_DN4794_c0_g11	TRINITY_DN4794_c0_g1_i11	FvH4_7g20510.1	100	0	1410	cyclic nucleotide-gated ion channel 1-like [Fragaria vesca subsp. vesca]
TRINITY_DN24708_c0_g2	TRINITY_DN24708_c0_g2_i1	FvH4_7g13020.1	100	0	1015	cyclic nucleotide-gated ion channel 1-like isoform X1 [Fragaria vesca subsp. vesca]
TRINITY_DN6440_c0_g2	TRINITY_DN6440_c0_g2_i1	FvH4_6g13780.1	100	1e-114	334	cyclic nucleotide-gated ion channel 1-like isoform X2 [Fragaria vesca subsp. vesca]
TRINITY_DN18456_c0_g1	TRINITY_DN18456_c0_g1_i2	FvH4_3g21060.1	100	0	927	cyclic nucleotide-gated ion channel 4 [Fragaria vesca subsp. vesca]
TRINITY_DN53873_c0_g1	TRINITY_DN53873_c0_g1_i1	FvH4_6g07730.1	100	2e-132	379	cyclic phosphodiesterase-like [Fragaria vesca subsp. vesca]
TRINITY_DN331_c1_g2	TRINITY_DN331_c1_g2_i1	FvH4_7g16680.1	100	1e-155	449	cyclic pyranopterin monophosphate synthase accessory protein, mitochondrial [Fragaria vesca subsp. vesca]
TRINITY_DN2241_c1_g3	TRINITY_DN2241_c1_g3_i2	FvH4_5g30330.1	100	0	994	cyclic pyranopterin monophosphate synthase, mitochondrial [Fragaria vesca subsp. vesca]<>cyclic pyranopterin monophosphate synthase, mitochondrial [Fragaria vesca subsp. vesca]
TRINITY_DN10236_c0_g1	TRINITY_DN10236_c0_g1_i1	FvH4_2g30100.1	100	0	977	cyclin-A2-2 [Fragaria vesca subsp. vesca]<>cyclin-A2-2 [Fragaria vesca subsp. vesca]
TRINITY_DN1440_c2_g1	TRINITY_DN1440_c2_g1_i2	FvH4_4g34970.1	100	1e-123	384	cyclin-D1-1 [Fragaria vesca subsp. vesca]
TRINITY_DN6460_c0_g1	TRINITY_DN6460_c0_g1_i1	FvH4_2g03630.1	100	0	567	cyclin-D1-1-like isoform X1 [Fragaria vesca subsp. vesca]
TRINITY_DN5320_c0_g1	TRINITY_DN5320_c0_g1_i3	FvH4_2g33760.1	100	0	636	cyclin-D3-3-like [Fragaria vesca subsp. vesca]
TRINITY_DN2186_c0_g1	TRINITY_DN2186_c0_g1_i1	FvH4_5g35800.1	100	0	674	cyclin-D4-1-like [Fragaria vesca subsp. vesca]
TRINITY_DN167157_c0_g1	TRINITY_DN167157_c0_g1_i1	FvH4_2g33190.1	100	2e-101	303	cyclin-D5-1-like isoform X1 [Fragaria vesca subsp. vesca]
TRINITY_DN3779_c1_g1	TRINITY_DN3779_c1_g1_i3	FvH4_1g25340.1	100	2e-146	450	cyclin-dependent kinase E-1 [Fragaria vesca subsp. vesca]
TRINITY_DN4582_c0_g2	TRINITY_DN4582_c0_g2_i1	FvH4_1g05460.1	100	0	945	cyclin-dependent kinase F-1 [Fragaria vesca subsp. vesca]
TRINITY_DN4284_c0_g1	TRINITY_DN4284_c0_g1_i2	FvH4_2g19080.1	100	7e-98	300	cyclin-dependent kinase inhibitor 3-like [Fragaria vesca subsp. vesca]
TRINITY_DN4151_c0_g1	TRINITY_DN4151_c0_g1_i2	FvH4_1g15820.1	100	2e-71	232	cyclin-dependent kinase inhibitor 7 [Fragaria vesca subsp. vesca]
TRINITY_DN4981_c0_g1	TRINITY_DN4981_c0_g1_i1	FvH4_3g30520.1	100	2e-54	177	cyclin-dependent kinases regulatory subunit 1 [Fragaria vesca subsp. vesca]
TRINITY_DN180435_c0_g1	TRINITY_DN180435_c0_g1_i1	FvH4_3g30440.1	100	9e-78	238	cyclin-dependent protein kinase inhibitor SMR2
TRINITY_DN11115_c0_g1	TRINITY_DN11115_c0_g1_i2	FvH4_7g06790.1	100	2e-51	172	cyclin-dependent protein kinase inhibitor SMR2-like [Fragaria vesca subsp. vesca]
TRINITY_DN765_c5_g1	TRINITY_DN765_c5_g1_i1	FvH4_3g35950.1	100	4e-111	328	cyclin-dependent protein kinase inhibitor SMR3
TRINITY_DN177646_c0_g1	TRINITY_DN177646_c0_g1_i1	FvH4_6g13440.1	100	9e-40	135	cyclin-dependent protein kinase inhibitor SMR4 [Rosa chinensis]<>hypothetical protein RchiOBHm_Chr3g0466321 [Rosa chinensis]
TRINITY_DN15200_c0_g1	TRINITY_DN15200_c0_g1_i1	FvH4_4g25460.1	100	2e-71	219	cyclin-dependent protein kinase inhibitor SMR6-like \\ 3.20E-113 \\ 66.80 %
TRINITY_DN48837_c0_g1	TRINITY_DN48837_c0_g1_i1	FvH4_1g20320.1	100	1e-20	82.4	cyclin-SDS [Fragaria vesca subsp. vesca]
TRINITY_DN19839_c0_g1	TRINITY_DN19839_c0_g1_i2	FvH4_2g39390.1	100	0	661	cyclin-T1-3 [Fragaria vesca subsp. vesca]
TRINITY_DN113313_c1_g1	TRINITY_DN113313_c1_g1_i1	FvH4_6g16340.1	100	2e-119	339	cyclin-T1-4-like [Fragaria vesca subsp. vesca]
TRINITY_DN8270_c1_g1	TRINITY_DN8270_c1_g1_i7	FvH4_4g15100.1	100	0	639	cyclin-T1-4-like isoform X2 [Fragaria vesca subsp. vesca]
TRINITY_DN38128_c0_g1	TRINITY_DN38128_c0_g1_i1	FvH4_6g43560.1	100	5e-95	294	cyclin-U1-1 [Fragaria vesca subsp. vesca]
TRINITY_DN8373_c0_g1	TRINITY_DN8373_c0_g1_i1	FvH4_7g10850.1	100	2e-116	292	cyclin-U2-1 [Fragaria vesca subsp. vesca]
TRINITY_DN9918_c0_g1	TRINITY_DN9918_c0_g1_i1	FvH4_7g09340.1	100	2e-129	374	cyclin-U4-1 [Fragaria vesca subsp. vesca]
TRINITY_DN1847_c0_g2	TRINITY_DN1847_c0_g2_i2	FvH4_7g28300.1	100	2e-133	390	cysteine and histidine-rich domain-containing protein RAR1 [Fragaria vesca subsp. vesca]
TRINITY_DN563_c0_g32	TRINITY_DN563_c0_g3_i12	FvH4_1g18610.1	100	0	927	cysteine desulfurase 1, mitochondrial [Fragaria vesca subsp. vesca]
TRINITY_DN205122_c0_g1	TRINITY_DN205122_c0_g1_i1	FvH4_3g08020.1	100	9e-69	208	cysteine proteinase inhibitor 1-like [Fragaria vesca subsp. vesca]
TRINITY_DN20326_c0_g1	TRINITY_DN20326_c0_g1_i1	FvH4_6g08210.1	100	3e-58	184	cysteine proteinase inhibitor 5-like [Fragaria vesca subsp. vesca]
TRINITY_DN80528_c0_g1	TRINITY_DN80528_c0_g1_i1	FvH4_6g08240.1	100	4e-73	221	cysteine proteinase inhibitor 5-like [Fragaria vesca subsp. vesca]
TRINITY_DN2523_c0_g1	TRINITY_DN2523_c0_g1_i1	FvH4_2g05500.1	100	0	871	cysteine proteinase RD21a-like [Fragaria vesca subsp. vesca]
TRINITY_DN2577_c0_g1	TRINITY_DN2577_c0_g1_i2	FvH4_6g39680.1	100	1e-21	88.6	cysteine-rich and transmembrane domain-containing protein B-like [Fragaria vesca subsp. vesca]
TRINITY_DN5041_c0_g1	TRINITY_DN5041_c0_g1_i3	FvH4_3g02640.1	100	8e-53	132	cysteine-rich PDZ-binding protein [Fragaria vesca subsp. vesca]
TRINITY_DN40806_c0_g1	TRINITY_DN40806_c0_g1_i2	FvH4_4g25840.1	100	4e-46	146	cysteine-rich receptor-like protein kinase 3
TRINITY_DN4754_c0_g1	TRINITY_DN4754_c0_g1_i4	FvH4_4g33800.1	100	3e-155	471	cysteine-rich repeat secretory protein 12-like [Fragaria vesca subsp. vesca]
TRINITY_DN1838_c0_g20	TRINITY_DN1838_c0_g2_i10	FvH4_4g04620.1	100	4e-152	462	cysteine-rich repeat secretory protein 3 isoform X1 [Fragaria vesca subsp. vesca]<>cysteine-rich repeat secretory protein 3 isoform X1 [Fragaria vesca subsp. vesca]
TRINITY_DN832_c2_g1	TRINITY_DN832_c2_g1_i1	FvH4_1g30260.1	100	1e-169	485	cysteine-rich repeat secretory protein 60 [Fragaria vesca subsp. vesca]
TRINITY_DN12182_c0_g1	TRINITY_DN12182_c0_g1_i1	FvH4_4g27030.1	100	0	1030	cysteine--tRNA ligase, cytoplasmic [Fragaria vesca subsp. vesca]
TRINITY_DN4122_c0_g2	TRINITY_DN4122_c0_g2_i1	FvH4_2g19040.1	100	3e-93	282	cytochrome b5 [Fragaria vesca subsp. vesca]
TRINITY_DN9213_c0_g1	TRINITY_DN9213_c0_g1_i1	FvH4_6g41290.1	100	0	656	cytochrome b561 and DOMON domain-containing protein At2g04850 [Fragaria vesca subsp. vesca]
TRINITY_DN7285_c0_g2	TRINITY_DN7285_c0_g2_i1	FvH4_2g18000.1	100	0	704	cytochrome b561 and DOMON domain-containing protein At3g25290 [Fragaria vesca subsp. vesca]
TRINITY_DN16152_c0_g1	TRINITY_DN16152_c0_g1_i1	FvH4_7g16430.1	100	0	823	cytochrome b561 and DOMON domain-containing protein At3g61750 [Fragaria vesca subsp. vesca]
TRINITY_DN8998_c0_g1	TRINITY_DN8998_c0_g1_i1	FvH4_3g23200.1	100	0	814	cytochrome b561 and DOMON domain-containing protein At5g35735-like [Fragaria vesca subsp. vesca]
TRINITY_DN63939_c0_g1	TRINITY_DN63939_c0_g1_i1	FvH4_1g06100.1	100	3e-67	211	cytochrome B5-like protein [Fragaria vesca subsp. vesca]<>cytochrome B5-like protein [Fragaria vesca subsp. vesca]
TRINITY_DN26250_c0_g1	TRINITY_DN26250_c0_g1_i1	FvH4_6g44370.1	100	5e-145	416	cytochrome b6-f complex iron-sulfur subunit, chloroplastic [Fragaria vesca subsp. vesca]
TRINITY_DN9330_c1_g1	TRINITY_DN9330_c1_g1_i1	FvH4_4g07960.1	100	3e-46	147	cytochrome b-c1 complex subunit 8-like [Fragaria vesca subsp. vesca]
TRINITY_DN9597_c0_g1	TRINITY_DN9597_c0_g1_i1	FvH4_4g32870.1	100	4e-44	149	cytochrome b-c1 complex subunit 8-like [Fragaria vesca subsp. vesca]
TRINITY_DN2906_c0_g2	TRINITY_DN2906_c0_g2_i1	FvH4_5g38790.1	100	3e-44	147	cytochrome b-c1 complex subunit 9-like [Fragaria vesca subsp. vesca]
TRINITY_DN2450_c0_g1	TRINITY_DN2450_c0_g1_i1	FvH4_4g22600.1	100	0	539	cytochrome b-c1 complex subunit Rieske-4, mitochondrial-like [Fragaria vesca subsp. vesca]
TRINITY_DN17728_c0_g1	TRINITY_DN17728_c0_g1_i4	FvH4_1g01100.1	100	7e-78	241	cytochrome c oxidase assembly factor 6 isoform X1 [Rosa chinensis]
TRINITY_DN15741_c0_g3	TRINITY_DN15741_c0_g3_i3	FvH4_4g10230.1	100	7e-49	164	cytochrome c oxidase subunit 6b-2 [Fragaria vesca subsp. vesca]
TRINITY_DN14117_c0_g1	TRINITY_DN14117_c0_g1_i1	FvH4_3g12220.1	100	2e-113	329	cytochrome c6, chloroplastic isoform X1 [Fragaria vesca subsp. vesca]
TRINITY_DN15544_c0_g1	TRINITY_DN15544_c0_g1_i1	FvH4_3g20940.1	100	0	679	cytochrome c-type biogenesis ccda-like chloroplastic protein isoform X1 [Fragaria vesca subsp. vesca]
TRINITY_DN887_c0_g2	TRINITY_DN887_c0_g2_i3	FvH4_7g12300.1	100	0	555	cytochrome P450 704C1-like [Fragaria vesca subsp. vesca]
TRINITY_DN887_c0_g3	TRINITY_DN887_c0_g3_i1	FvH4_7g12290.1	100	0	729	cytochrome P450 704C1-like [Fragaria vesca subsp. vesca]
TRINITY_DN45719_c0_g1	TRINITY_DN45719_c0_g1_i8	FvH4_7g00630.1	100	1e-159	481	cytochrome P450 705A20 [Fragaria vesca subsp. vesca]
TRINITY_DN921_c6_g1	TRINITY_DN921_c6_g1_i1	FvH4_3g05750.1	100	0	961	cytochrome P450 710A1-like [Fragaria vesca subsp. vesca]
TRINITY_DN12957_c0_g1	TRINITY_DN12957_c0_g1_i2	FvH4_6g09310.1	100	0	560	cytochrome P450 714A1-like
TRINITY_DN11266_c0_g1	TRINITY_DN11266_c0_g1_i1	FvH4_7g09120.1	100	0	989	cytochrome P450 714C2-like [Fragaria vesca subsp. vesca]
TRINITY_DN18331_c0_g1	TRINITY_DN18331_c0_g1_i1	FvH4_6g00880.1	100	0	1064	cytochrome P450 714C2-like [Fragaria vesca subsp. vesca]
TRINITY_DN24164_c0_g2	TRINITY_DN24164_c0_g2_i3	FvH4_3g22440.1	100	0	896	cytochrome P450 716B1-like [Fragaria vesca subsp. vesca]
TRINITY_DN869_c0_g1	TRINITY_DN869_c0_g1_i7	FvH4_3g17450.1	100	0	998	cytochrome P450 71A1-like [Fragaria vesca subsp. vesca]
TRINITY_DN1010_c1_g1	TRINITY_DN1010_c1_g1_i3	FvH4_5g07540.1	100	0	1003	cytochrome P450 71A26-like [Fragaria vesca subsp. vesca]
TRINITY_DN1187_c0_g2	TRINITY_DN1187_c0_g2_i2	FvH4_2g12910.1	100	0	1045	cytochrome P450 71A4-like [Fragaria vesca subsp. vesca]<>cytochrome P450 71A4-like [Fragaria vesca subsp. vesca]<>cytochrome P450 71A4-like [Fragaria vesca subsp. vesca]
TRINITY_DN11637_c0_g1	TRINITY_DN11637_c0_g1_i4	FvH4_6g52040.1	100	0	830	cytochrome P450 724B1 [Fragaria vesca subsp. vesca]
TRINITY_DN4906_c0_g1	TRINITY_DN4906_c0_g1_i1	FvH4_6g40310.1	100	0	965	cytochrome P450 724B1-like [Fragaria vesca subsp. vesca]
TRINITY_DN2737_c0_g1	TRINITY_DN2737_c0_g1_i5	FvH4_1g08410.1	100	0	1051	cytochrome P450 72A15-like isoform X2 [Fragaria vesca subsp. vesca]
TRINITY_DN18694_c0_g1	TRINITY_DN18694_c0_g1_i1	FvH4_6g17540.1	100	0	1114	cytochrome P450 76A1-like [Fragaria vesca subsp. vesca]
TRINITY_DN10246_c0_g1	TRINITY_DN10246_c0_g1_i1	FvH4_7g05960.1	100	0	1002	cytochrome P450 77A3-like [Fragaria vesca subsp. vesca]
TRINITY_DN11980_c0_g1	TRINITY_DN11980_c0_g1_i1	FvH4_1g12210.1	100	0	971	cytochrome P450 84A1 [Fragaria vesca subsp. vesca]
TRINITY_DN119937_c0_g2	TRINITY_DN119937_c0_g2_i1	FvH4_3g38270.1	100	0	1048	cytochrome P450 86A1 [Fragaria vesca subsp. vesca]
TRINITY_DN1693_c0_g1	TRINITY_DN1693_c0_g1_i2	FvH4_7g14480.1	100	0	1111	cytochrome P450 86A8-like [Fragaria vesca subsp. vesca]
TRINITY_DN12796_c0_g1	TRINITY_DN12796_c0_g1_i1	FvH4_4g36980.1	100	0	1164	cytochrome P450 86B1 [Fragaria vesca subsp. vesca]
TRINITY_DN4230_c0_g13	TRINITY_DN4230_c0_g1_i13	FvH4_5g01580.1	100	0	992	cytochrome P450 87A3 [Fragaria vesca subsp. vesca]
TRINITY_DN12072_c0_g1	TRINITY_DN12072_c0_g1_i3	FvH4_2g16500.1	100	0	604	cytochrome P450 87A3-like [Fragaria vesca subsp. vesca]
TRINITY_DN182434_c0_g1	TRINITY_DN182434_c0_g1_i1	FvH4_7g21810.1	100	4e-40	133	cytochrome P450 89A2 [Prunus persica]<>hypothetical protein PRUPE_2G296600 [Prunus persica]
TRINITY_DN19347_c0_g1	TRINITY_DN19347_c0_g1_i2	FvH4_7g24370.1	100	0	919	cytochrome P450 90A1 [Fragaria vesca subsp. vesca]
TRINITY_DN1349_c0_g2	TRINITY_DN1349_c0_g2_i2	FvH4_2g22170.1	100	0	964	cytochrome P450 94A1-like [Fragaria vesca subsp. vesca]
TRINITY_DN6007_c0_g1	TRINITY_DN6007_c0_g1_i4	FvH4_5g12550.1	100	0	1036	cytochrome P450 94B3-like [Fragaria vesca subsp. vesca]
TRINITY_DN12688_c0_g3	TRINITY_DN12688_c0_g3_i2	FvH4_3g24520.1	100	0	998	cytochrome P450 94C1-like [Fragaria vesca subsp. vesca]
TRINITY_DN14069_c0_g1	TRINITY_DN14069_c0_g1_i1	FvH4_6g18280.1	100	0	1018	cytochrome P450 94C1-like [Fragaria vesca subsp. vesca]
TRINITY_DN1901_c0_g2	TRINITY_DN1901_c0_g2_i1	FvH4_1g29330.1	100	0	625	cytochrome P450 98A2 [Fragaria vesca subsp. vesca]
TRINITY_DN1810_c0_g1	TRINITY_DN1810_c0_g1_i8	FvH4_7g03990.1	100	0	1093	cytochrome P450 CYP72A219-like isoform X1 [Fragaria vesca subsp. vesca]
TRINITY_DN18103_c0_g2	TRINITY_DN18103_c0_g2_i1	FvH4_7g15050.1	100	0	1019	cytochrome P450 CYP736A12-like [Fragaria vesca subsp. vesca]
TRINITY_DN36941_c0_g1	TRINITY_DN36941_c0_g1_i1	FvH4_4g29410.1	100	8e-29	108	cytochrome P450 CYP749A22-like [Rosa chinensis]<>putative cytochrome P450 [Rosa chinensis]
TRINITY_DN8054_c1_g1	TRINITY_DN8054_c1_g1_i7	FvH4_7g16520.1	100	0	1084	cytochrome P450 CYP82D47-like [Fragaria vesca subsp. vesca]
TRINITY_DN6627_c0_g4	TRINITY_DN6627_c0_g4_i1	FvH4_1g07620.1	100	0	1049	cytokinin dehydrogenase 3 [Fragaria vesca subsp. vesca]
TRINITY_DN7745_c0_g1	TRINITY_DN7745_c0_g1_i1	FvH4_2g30990.1	100	0	622	cytokinin dehydrogenase 7 [Fragaria vesca subsp. vesca]
TRINITY_DN13243_c0_g1	TRINITY_DN13243_c0_g1_i1	FvH4_3g04610.1	100	0	572	cytokinin dehydrogenase 7-like [Fragaria vesca subsp. vesca]
TRINITY_DN7745_c0_g2	TRINITY_DN7745_c0_g2_i4	FvH4_6g05970.1	100	7e-58	134	cytokinin dehydrogenase 7-like [Fragaria vesca subsp. vesca]
TRINITY_DN783_c2_g2	TRINITY_DN783_c2_g2_i1	FvH4_3g04300.1	100	7e-157	447	cytokinin riboside 5'-monophosphate phosphoribohydrolase LOG1-like [Fragaria vesca subsp. vesca]
TRINITY_DN39410_c0_g1	TRINITY_DN39410_c0_g1_i4	FvH4_3g04250.1	100	2e-107	310	cytokinin riboside 5'-monophosphate phosphoribohydrolase LOG3-like isoform X1 [Fragaria vesca subsp. vesca]
TRINITY_DN5666_c0_g1	TRINITY_DN5666_c0_g1_i1	FvH4_6g37460.1	100	0	775	D-3-phosphoglycerate dehydrogenase 2, chloroplastic [Fragaria vesca subsp. vesca]
TRINITY_DN11445_c0_g1	TRINITY_DN11445_c0_g1_i1	FvH4_3g19330.1	100	0	697	D-amino-acid transaminase, chloroplastic-like [Fragaria vesca subsp. vesca]
TRINITY_DN13623_c0_g1	TRINITY_DN13623_c0_g1_i1	FvH4_2g35980.1	100	0	818	D-amino-acid transaminase, chloroplastic-like [Fragaria vesca subsp. vesca]
TRINITY_DN235892_c0_g1	TRINITY_DN235892_c0_g1_i1	FvH4_4g17880.1	100	1e-119	360	DAZ-associated protein 1-like [Fragaria vesca subsp. vesca]
TRINITY_DN5906_c0_g1	TRINITY_DN5906_c0_g1_i1	FvH4_2g07730.1	100	2e-180	507	DC1 domain-containing protein \\ 4.20E-93 \\ 71.11 %
TRINITY_DN473_c0_g2	TRINITY_DN473_c0_g2_i1	FvH4_2g24050.1	100	3e-11	63.9	DCN1-like protein 5 isoform X1
TRINITY_DN18936_c0_g1	TRINITY_DN18936_c0_g1_i1	FvH4_5g14400.1	100	3e-77	236	dCTP pyrophosphatase 1-like [Fragaria vesca subsp. vesca]
TRINITY_DN7898_c0_g1	TRINITY_DN7898_c0_g1_i2	FvH4_2g17930.1	100	2e-35	132	dCTP pyrophosphatase 1-like [Fragaria vesca subsp. vesca]
TRINITY_DN6071_c0_g1	TRINITY_DN6071_c0_g1_i2	FvH4_4g03950.1	100	4e-90	271	dCTP pyrophosphatase 1-like isoform X1 [Fragaria vesca subsp. vesca]
TRINITY_DN9413_c0_g1	TRINITY_DN9413_c0_g1_i5	FvH4_3g21950.1	100	7e-137	402	DDRGK domain-containing protein 1 [Fragaria vesca subsp. vesca]
TRINITY_DN9090_c1_g1	TRINITY_DN9090_c1_g1_i4	FvH4_3g33550.1	100	3e-51	175	DEAD-box ATP-dependent RNA helicase 14 [Rosa chinensis]<>putative RNA helicase [Rosa chinensis]
TRINITY_DN17589_c0_g1	TRINITY_DN17589_c0_g1_i1	FvH4_1g09140.1	100	0	1100	DEAD-box ATP-dependent RNA helicase 17 [Fragaria vesca subsp. vesca]
TRINITY_DN88_c1_g1	TRINITY_DN88_c1_g1_i6	FvH4_6g33220.1	100	0	677	DEAD-box ATP-dependent RNA helicase 20 [Fragaria vesca subsp. vesca]
TRINITY_DN1417_c0_g1	TRINITY_DN1417_c0_g1_i2	FvH4_2g13750.1	100	0	1204	DEAD-box ATP-dependent RNA helicase 21 [Fragaria vesca subsp. vesca]<>DEAD-box ATP-dependent RNA helicase 21 [Fragaria vesca subsp. vesca]
TRINITY_DN7766_c0_g1	TRINITY_DN7766_c0_g1_i2	FvH4_2g38260.1	100	0	1233	DEAD-box ATP-dependent RNA helicase 28 [Fragaria vesca subsp. vesca]
TRINITY_DN6903_c0_g2	TRINITY_DN6903_c0_g2_i2	FvH4_6g08810.1	100	0	1216	DEAD-box ATP-dependent RNA helicase 3, chloroplastic [Fragaria vesca subsp. vesca]
TRINITY_DN65322_c0_g2	TRINITY_DN65322_c0_g2_i1	FvH4_6g29290.1	100	0	1168	DEAD-box ATP-dependent RNA helicase 35 [Fragaria vesca subsp. vesca]
TRINITY_DN1816_c0_g2	TRINITY_DN1816_c0_g2_i5	FvH4_5g26270.1	100	0	1654	DEAD-box ATP-dependent RNA helicase 42 [Fragaria vesca subsp. vesca]<>DEAD-box ATP-dependent RNA helicase 42 [Fragaria vesca subsp. vesca]<>DEAD-box ATP-dependent RNA helicase 42 [Fragaria vesca subsp. vesca]<>DEAD-box ATP-dependent RNA helicase 42 [Fragaria vesca subsp. vesca]<>DEAD-box ATP-dependent RNA helicase 42 [Fragaria vesca subsp. vesca]
TRINITY_DN1816_c0_g1	TRINITY_DN1816_c0_g1_i2	FvH4_3g27090.1	100	0	1828	DEAD-box ATP-dependent RNA helicase 42-like [Fragaria vesca subsp. vesca]<>DEAD-box ATP-dependent RNA helicase 42-like [Fragaria vesca subsp. vesca]
TRINITY_DN2954_c0_g1	TRINITY_DN2954_c0_g1_i2	FvH4_2g15280.1	100	0	1121	DEAD-box ATP-dependent RNA helicase 47B [Fragaria vesca subsp. vesca]
TRINITY_DN12794_c0_g1	TRINITY_DN12794_c0_g1_i1	FvH4_4g21860.1	100	0	1350	DEAD-box ATP-dependent RNA helicase 50 isoform X1 [Fragaria vesca subsp. vesca]
TRINITY_DN8250_c0_g1	TRINITY_DN8250_c0_g1_i5	FvH4_4g14870.1	100	0	574	DEAD-box ATP-dependent RNA helicase 58, chloroplastic isoform X1 [Fragaria vesca subsp. vesca]
TRINITY_DN8428_c0_g1	TRINITY_DN8428_c0_g1_i2	FvH4_7g28410.1	100	0	990	DEAD-box ATP-dependent RNA helicase 7 [Fragaria vesca subsp. vesca]
TRINITY_DN88011_c0_g1	TRINITY_DN88011_c0_g1_i1	FvH4_7g17480.1	100	2e-77	234	death domain associated protein
TRINITY_DN1061_c0_g1	TRINITY_DN1061_c0_g1_i5	FvH4_2g30140.1	100	0	2070	death-inducer obliterator 1 [Fragaria vesca subsp. vesca]
TRINITY_DN544_c1_g1	TRINITY_DN544_c1_g1_i3	FvH4_5g24990.1	100	0	959	decapping 5-like protein [Fragaria vesca subsp. vesca]
TRINITY_DN2891_c0_g1	TRINITY_DN2891_c0_g1_i2	FvH4_5g18850.1	100	2e-72	226	Decaprenyl diphosphate synthase
TRINITY_DN210513_c0_g1	TRINITY_DN210513_c0_g1_i1	FvH4_2g39480.1	100	1e-21	82.4	defensin-like protein 19 [Fragaria vesca subsp. vesca]
TRINITY_DN9535_c0_g1	TRINITY_DN9535_c0_g1_i5	FvH4_3g38830.1	100	1e-88	287	defensin-like protein 296 [Fragaria vesca subsp. vesca]
TRINITY_DN237855_c0_g1	TRINITY_DN237855_c0_g1_i1	FvH4_7g28950.1	100	2e-146	420	dehydration-responsive element-binding protein 1A
TRINITY_DN116882_c0_g1	TRINITY_DN116882_c0_g1_i1	FvH4_5g01440.1	100	4e-70	216	dehydration-responsive element-binding protein 1E [Fragaria vesca subsp. vesca]
TRINITY_DN10669_c0_g1	TRINITY_DN10669_c0_g1_i1	FvH4_7g25200.1	100	0	679	dehydration-responsive element-binding protein 2A-like [Fragaria vesca subsp. vesca]<>dehydration-responsive element-binding protein 2A-like [Fragaria vesca subsp. vesca]
TRINITY_DN19567_c0_g1	TRINITY_DN19567_c0_g1_i1	FvH4_2g38880.1	100	2e-103	311	dehydration-responsive element-binding protein 2D-like [Fragaria vesca subsp. vesca]
TRINITY_DN15838_c0_g2	TRINITY_DN15838_c0_g2_i1	FvH4_2g35620.1	100	3e-152	447	dehydration-responsive element-binding protein 3-like [Fragaria vesca subsp. vesca]
TRINITY_DN32865_c0_g1	TRINITY_DN32865_c0_g1_i1	FvH4_2g16030.1	100	7e-44	150	dehydrin COR47-like [Fragaria vesca subsp. vesca]
TRINITY_DN2146_c0_g1	TRINITY_DN2146_c0_g1_i1	FvH4_1g12560.1	100	1e-21	91.3	dehydrin Xero 1-like [Fragaria vesca subsp. vesca]
TRINITY_DN9075_c0_g1	TRINITY_DN9075_c0_g1_i2	FvH4_3g38480.1	100	1e-91	292	dehydrodolichyl diphosphate synthase 2 [Fragaria vesca subsp. vesca]
TRINITY_DN5506_c0_g1	TRINITY_DN5506_c0_g1_i1	FvH4_6g40700.1	100	2e-71	221	della protein gai1
TRINITY_DN34548_c0_g1	TRINITY_DN34548_c0_g1_i1	FvH4_5g07610.1	100	0	988	DELLA protein RGA2-like [Fragaria vesca subsp. vesca]
TRINITY_DN323644_c0_g1	TRINITY_DN323644_c0_g1_i1	FvH4_7g06470.1	100	0	1060	DELLA protein RGL1-like [Fragaria vesca subsp. vesca]
TRINITY_DN6658_c0_g4	TRINITY_DN6658_c0_g4_i1	FvH4_4g36730.1	100	0	1200	delta(24)-sterol reductase [Fragaria vesca subsp. vesca]<>delta(24)-sterol reductase [Fragaria vesca subsp. vesca]
TRINITY_DN1279_c1_g1	TRINITY_DN1279_c1_g1_i7	FvH4_2g26170.1	100	1e-131	413	delta(7)-sterol-C5(6)-desaturase-like [Fragaria vesca subsp. vesca]
TRINITY_DN7436_c0_g1	TRINITY_DN7436_c0_g1_i2	FvH4_2g31760.1	100	0	938	delta(8)-fatty-acid desaturase 1-like [Fragaria vesca subsp. vesca]
TRINITY_DN1973_c0_g1	TRINITY_DN1973_c0_g1_i4	FvH4_2g27170.1	100	0	749	delta-aminolevulinic acid dehydratase, chloroplastic [Fragaria vesca subsp. vesca]
TRINITY_DN641_c0_g1	TRINITY_DN641_c0_g1_i3	FvH4_2g02980.1	100	6e-42	150	dentin sialophosphoprotein [Fragaria vesca subsp. vesca]
TRINITY_DN15_c1_g1	TRINITY_DN15_c1_g1_i2	FvH4_6g50610.1	100	0	955	deoxynucleoside triphosphate triphosphohydrolase SAMHD1 homolog [Fragaria vesca subsp. vesca]
TRINITY_DN5592_c0_g1	TRINITY_DN5592_c0_g1_i1	FvH4_1g18640.1	100	0	560	Deoxyribodipyrimidine photo-lyase \\ 0.00E+00 \\ 91.72 %
TRINITY_DN7973_c0_g1	TRINITY_DN7973_c0_g1_i2	FvH4_1g06480.1	100	3e-147	426	derlin-1 [Fragaria vesca subsp. vesca]
TRINITY_DN6731_c0_g1	TRINITY_DN6731_c0_g1_i4	FvH4_3g02350.1	100	5e-135	362	derlin-2.2 [Fragaria vesca subsp. vesca]
TRINITY_DN3246_c0_g1	TRINITY_DN3246_c0_g1_i3	FvH4_7g15450.1	100	5e-78	166	desiccation protectant protein Lea14 homolog [Fragaria vesca subsp. vesca]
TRINITY_DN7172_c0_g1	TRINITY_DN7172_c0_g1_i5	FvH4_7g15470.1	100	2e-125	372	desiccation protectant protein Lea14 homolog [Fragaria vesca subsp. vesca]
TRINITY_DN41773_c0_g2	TRINITY_DN41773_c0_g2_i1	FvH4_2g25280.1	100	0	590	desiccation-related protein PCC13-62 [Rosa chinensis]<>hypothetical protein RchiOBHm_Chr6g0293411 [Rosa chinensis]
TRINITY_DN15928_c0_g1	TRINITY_DN15928_c0_g1_i1	FvH4_4g20640.1	100	0	609	desiccation-related protein PCC13-62-like [Fragaria vesca subsp. vesca]
TRINITY_DN1708_c2_g1	TRINITY_DN1708_c2_g1_i1	FvH4_2g40830.1	100	7e-61	208	deSI-like protein At4g17486 [Fragaria vesca subsp. vesca]
TRINITY_DN82_c2_g1	TRINITY_DN82_c2_g1_i5	FvH4_7g30180.1	100	8e-88	284	deSI-like protein At4g17486 [Fragaria vesca subsp. vesca]
TRINITY_DN3027_c0_g2	TRINITY_DN3027_c0_g2_i2	FvH4_5g03180.1	100	2e-11	63.2	DET1- and DDB1-associated protein 1 [Fragaria vesca subsp. vesca]
TRINITY_DN203567_c0_g1	TRINITY_DN203567_c0_g1_i1	FvH4_6g46420.1	100	8e-174	492	developmental protein SEPALLATA 1 [Fragaria vesca subsp. vesca]<>MADS-RIN-like protein [Fragaria x ananassa]
TRINITY_DN3155_c3_g1	TRINITY_DN3155_c3_g1_i2	FvH4_1g22580.1	100	0	686	developmentally-regulated G-protein 3 [Rosa chinensis]<>putative GTP binding protein, second [Rosa chinensis]
TRINITY_DN5214_c0_g1	TRINITY_DN5214_c0_g1_i1	FvH4_3g36830.1	100	6e-63	199	DEVIL-like protein
TRINITY_DN1270_c0_g1	TRINITY_DN1270_c0_g1_i1	FvH4_4g06170.1	100	0	1962	DExH-box ATP-dependent RNA helicase DExH10
TRINITY_DN6376_c0_g3	TRINITY_DN6376_c0_g3_i5	FvH4_4g08400.1	100	2e-170	514	diacylglycerol kinase 4-like [Fragaria vesca subsp. vesca]
TRINITY_DN3069_c0_g2	TRINITY_DN3069_c0_g2_i2	FvH4_3g21140.1	100	0	629	diacylglycerol kinase 5-like isoform X5 [Rosa chinensis]
TRINITY_DN6831_c0_g1	TRINITY_DN6831_c0_g1_i3	FvH4_6g14490.1	100	1e-119	365	diaminopimelate epimerase, chloroplastic [Fragaria vesca subsp. vesca]
TRINITY_DN6203_c0_g3	TRINITY_DN6203_c0_g3_i1	FvH4_3g28880.1	100	0	656	dicarboxylate transporter 1, chloroplastic [Fragaria vesca subsp. vesca]
TRINITY_DN2517_c1_g1	TRINITY_DN2517_c1_g1_i3	FvH4_2g11840.1	100	0	644	dicarboxylate transporter 2.1, chloroplastic-like [Fragaria vesca subsp. vesca]
TRINITY_DN716_c4_g1	TRINITY_DN716_c4_g1_i2	FvH4_2g39520.1	100	0	587	dihydroflavonol 4-reductase [Fragaria vesca]<>dihydroflavonol 4-reductase [Fragaria vesca]<>dihydroflavonol 4-reductase [Fragaria vesca]
TRINITY_DN19453_c0_g1	TRINITY_DN19453_c0_g1_i3	FvH4_2g34590.1	100	0	623	dihydroflavonol-4-reductase [Fragaria vesca subsp. vesca]
TRINITY_DN3861_c0_g1	TRINITY_DN3861_c0_g1_i3	FvH4_3g21610.1	100	5e-125	397	dihydroflavonol-4-reductase [Fragaria vesca subsp. vesca]<>dihydroflavonol-4-reductase [Fragaria x ananassa]
TRINITY_DN8640_c0_g1	TRINITY_DN8640_c0_g1_i1	FvH4_4g20900.1	100	0	997	dihydrolipoyl dehydrogenase, mitochondrial [Fragaria vesca subsp. vesca]
TRINITY_DN169233_c0_g1	TRINITY_DN169233_c0_g1_i1	FvH4_3g23070.1	100	0	852	dihydrolipoyllysine-residue succinyltransferase component of 2-oxoglutarate dehydrogenase complex 2, mitochondrial [Fragaria vesca subsp. vesca]
TRINITY_DN9639_c0_g1	TRINITY_DN9639_c0_g1_i2	FvH4_3g07800.1	100	0	830	dihydroorotate dehydrogenase (quinone), mitochondrial [Fragaria vesca subsp. vesca]
TRINITY_DN6988_c0_g1	TRINITY_DN6988_c0_g1_i2	FvH4_7g31630.1	100	0	1147	dipeptidyl peptidase 9 [Fragaria vesca subsp. vesca]<>dipeptidyl peptidase 9 [Fragaria vesca subsp. vesca]
TRINITY_DN9140_c0_g1	TRINITY_DN9140_c0_g1_i1	FvH4_5g30480.1	100	0	860	diphthamide biosynthesis protein 1 [Fragaria vesca subsp. vesca]<>diphthamide biosynthesis protein 1 [Fragaria vesca subsp. vesca]
TRINITY_DN15838_c0_g1	TRINITY_DN15838_c0_g1_i7	FvH4_4g10580.1	100	0	855	diphthamide biosynthesis protein 2 [Fragaria vesca subsp. vesca]
TRINITY_DN9747_c0_g1	TRINITY_DN9747_c0_g1_i1	FvH4_5g05540.1	100	0	733	diphthamide biosynthesis protein 7 homolog [Fragaria vesca subsp. vesca]
TRINITY_DN261593_c0_g1	TRINITY_DN261593_c0_g1_i1	FvH4_3g34760.1	100	7e-143	414	dirigent protein 10 [Fragaria vesca subsp. vesca]
TRINITY_DN253350_c0_g1	TRINITY_DN253350_c0_g1_i1	FvH4_2g01700.1	100	1e-38	129	dirigent protein 15-like [Fragaria vesca subsp. vesca]
TRINITY_DN238130_c0_g1	TRINITY_DN238130_c0_g1_i1	FvH4_4g05450.1	100	1e-163	461	dirigent protein 18-like [Fragaria vesca subsp. vesca]
TRINITY_DN324184_c0_g1	TRINITY_DN324184_c0_g1_i1	FvH4_4g05460.1	100	3e-150	427	dirigent protein 18-like [Fragaria vesca subsp. vesca]
TRINITY_DN38_c1_g1	TRINITY_DN38_c1_g1_i1	FvH4_7g31480.1	100	4e-114	332	dirigent protein 1-like [Fragaria vesca subsp. vesca]
TRINITY_DN81129_c0_g1	TRINITY_DN81129_c0_g1_i1	FvH4_6g43340.1	100	2e-105	308	dirigent protein 1-like [Fragaria vesca subsp. vesca]
TRINITY_DN4521_c0_g1	TRINITY_DN4521_c0_g1_i4	FvH4_2g01660.1	100	4e-125	360	dirigent protein 21-like [Fragaria vesca subsp. vesca]
TRINITY_DN16348_c0_g1	TRINITY_DN16348_c0_g1_i2	FvH4_7g02320.1	100	2e-144	431	dirigent protein 22-like
TRINITY_DN266272_c0_g1	TRINITY_DN266272_c0_g1_i1	FvH4_7g02300.1	100	3e-134	379	dirigent protein 22-like [Fragaria vesca subsp. vesca]
TRINITY_DN7033_c0_g2	TRINITY_DN7033_c0_g2_i1	FvH4_2g01690.1	100	2e-140	395	dirigent protein 23-like [Fragaria vesca subsp. vesca]
TRINITY_DN660_c3_g1	TRINITY_DN660_c3_g1_i1	FvH4_7g21010.1	100	6e-178	498	dirigent protein 25-like [Fragaria vesca subsp. vesca]
TRINITY_DN7471_c0_g2	TRINITY_DN7471_c0_g2_i1	FvH4_6g42490.1	100	3e-145	407	dirigent protein 3-like [Fragaria vesca subsp. vesca]
TRINITY_DN2338_c1_g11	TRINITY_DN2338_c1_g1_i11	FvH4_2g26510.1	100	0	2149	DIS3-like exonuclease 2 [Fragaria vesca subsp. vesca]
TRINITY_DN8696_c0_g2	TRINITY_DN8696_c0_g2_i1	FvH4_2g36840.1	100	1e-59	192	disease resistance protein At4g27190-like isoform X1
TRINITY_DN8507_c0_g1	TRINITY_DN8507_c0_g1_i2	FvH4_2g06550.1	100	0	753	disease resistance protein At4g27190-like isoform X1 [Fragaria vesca subsp. vesca]<>disease resistance protein At4g27190-like isoform X1 [Fragaria vesca subsp. vesca]
TRINITY_DN140_c0_g1	TRINITY_DN140_c0_g1_i7	FvH4_5g23450.1	100	0	1852	disease resistance protein RPM1-like [Fragaria vesca subsp. vesca]
TRINITY_DN16821_c0_g2	TRINITY_DN16821_c0_g2_i2	FvH4_5g23420.1	100	0	1908	disease resistance protein RPM1-like [Fragaria vesca subsp. vesca]
TRINITY_DN16821_c0_g4	TRINITY_DN16821_c0_g4_i2	FvH4_5g22710.1	100	0	1862	disease resistance protein RPM1-like [Fragaria vesca subsp. vesca]
TRINITY_DN10528_c0_g3	TRINITY_DN10528_c0_g3_i1	FvH4_5g23400.1	100	0	1883	disease resistance protein RPM1-like [Fragaria vesca subsp. vesca]<>disease resistance protein RPM1-like [Fragaria vesca subsp. vesca]
TRINITY_DN140_c0_g4	TRINITY_DN140_c0_g4_i1	FvH4_5g23470.1	100	0	1848	disease resistance protein RPM1-like [Fragaria vesca subsp. vesca]<>disease resistance protein RPM1-like [Fragaria vesca subsp. vesca]
TRINITY_DN15618_c0_g1	TRINITY_DN15618_c0_g1_i1	FvH4_7g10300.1	100	2e-25	103	disease resistance protein RPM1-like isoform X1
TRINITY_DN5317_c0_g1	TRINITY_DN5317_c0_g1_i1	FvH4_3g44030.1	100	0	866	disease resistance protein RPS2-like [Fragaria vesca subsp. vesca]
TRINITY_DN3195_c0_g1	TRINITY_DN3195_c0_g1_i1	FvH4_5g03710.1	100	9e-115	335	disease resistance response protein 206-like [Fragaria vesca subsp. vesca]
TRINITY_DN619_c0_g1	TRINITY_DN619_c0_g1_i2	FvH4_5g03700.1	100	2e-132	378	disease resistance response protein 206-like [Fragaria vesca subsp. vesca]
TRINITY_DN21764_c0_g1	TRINITY_DN21764_c0_g1_i1	FvH4_4g17240.1	100	0	816	divinyl chlorophyllide a 8-vinyl-reductase, chloroplastic [Fragaria vesca subsp. vesca]
TRINITY_DN14770_c0_g1	TRINITY_DN14770_c0_g1_i5	FvH4_1g20900.1	100	1e-64	211	DNA (cytosine-5)-methyltransferase 1-like [Prunus avium]
TRINITY_DN350_c3_g1	TRINITY_DN350_c3_g1_i1	FvH4_4g34370.1	100	5e-168	483	DNA ligase 1
TRINITY_DN3258_c0_g1	TRINITY_DN3258_c0_g1_i2	FvH4_3g09320.1	100	3e-111	328	DNA ligase 1 isoform X1
TRINITY_DN1966_c3_g1	TRINITY_DN1966_c3_g1_i1	FvH4_5g31560.1	100	0	1516	DNA mismatch repair protein MLH1 [Fragaria vesca subsp. vesca]
TRINITY_DN8527_c0_g1	TRINITY_DN8527_c0_g1_i1	FvH4_5g12700.1	100	0	1547	DNA mismatch repair protein MSH2 [Fragaria vesca subsp. vesca]
TRINITY_DN9526_c0_g1	TRINITY_DN9526_c0_g1_i4	FvH4_7g29360.1	100	0	2126	DNA mismatch repair protein MSH3 [Fragaria vesca subsp. vesca]
TRINITY_DN260258_c0_g1	TRINITY_DN260258_c0_g1_i1	FvH4_1g22780.1	100	3e-75	233	DNA polymerase delta subunit 4 [Fragaria vesca subsp. vesca]
TRINITY_DN16739_c0_g1	TRINITY_DN16739_c0_g1_i1	FvH4_3g32640.1	100	5e-41	151	DNA polymerase epsilon subunit C [Fragaria vesca subsp. vesca]
TRINITY_DN21633_c0_g1	TRINITY_DN21633_c0_g1_i1	FvH4_4g23840.1	100	2e-134	390	DNA polymerase epsilon subunit C [Fragaria vesca subsp. vesca]
TRINITY_DN1345_c2_g1	TRINITY_DN1345_c2_g1_i2	FvH4_3g22230.1	100	0	2162	DNA polymerase I A, chloroplastic/mitochondrial [Fragaria vesca subsp. vesca]
TRINITY_DN14743_c0_g5	TRINITY_DN14743_c0_g5_i1	FvH4_2g09010.1	100	8e-18	79.3	DNA repair ATPase [Streptomyces sp. or20]
TRINITY_DN5518_c0_g2	TRINITY_DN5518_c0_g2_i3	FvH4_3g33990.1	100	0	622	DNA repair protein RAD51 homolog 2 isoform X2 [Fragaria vesca subsp. vesca]
TRINITY_DN16126_c0_g1	TRINITY_DN16126_c0_g1_i1	FvH4_1g07730.1	100	2e-129	394	DNA repair protein recA homolog 3, mitochondrial [Fragaria vesca subsp. vesca]
TRINITY_DN217611_c0_g1	TRINITY_DN217611_c0_g1_i1	FvH4_4g36590.1	100	1e-12	63.9	DNA repair protein XRCC2 homolog [Fragaria vesca subsp. vesca]
TRINITY_DN22757_c1_g3	TRINITY_DN22757_c1_g3_i2	FvH4_4g08250.1	100	2e-41	145	DNA repair protein XRCC3 homolog [Fragaria vesca subsp. vesca]<>DNA repair protein XRCC3 homolog [Fragaria vesca subsp. vesca]<>DNA repair protein XRCC3 homolog [Fragaria vesca subsp. vesca]
TRINITY_DN6764_c0_g1	TRINITY_DN6764_c0_g1_i2	FvH4_2g07190.1	100	1e-42	155	DNA repair protein XRCC4 [Fragaria vesca subsp. vesca]
TRINITY_DN9767_c0_g1	TRINITY_DN9767_c0_g1_i1	FvH4_7g22520.1	100	3e-153	436	DNA replication complex GINS protein PSF2 [Fragaria vesca subsp. vesca]
TRINITY_DN266119_c0_g1	TRINITY_DN266119_c0_g1_i1	FvH4_7g24440.1	100	7e-17	73.2	DNA replication complex GINS protein psf3-like [Fragaria vesca subsp. vesca]
TRINITY_DN176_c0_g3	TRINITY_DN176_c0_g3_i2	FvH4_2g09990.1	100	0	1454	DNA replication licensing factor MCM4 [Fragaria vesca subsp. vesca]
TRINITY_DN1976_c1_g1	TRINITY_DN1976_c1_g1_i2	FvH4_3g13360.1	100	0	1576	DNA replication licensing factor MCM6 [Fragaria vesca subsp. vesca]
TRINITY_DN172771_c0_g1	TRINITY_DN172771_c0_g1_i1	FvH4_5g06310.1	100	3e-94	279	DNA replication regulator like
TRINITY_DN28071_c1_g1	TRINITY_DN28071_c1_g1_i1	FvH4_2g39170.1	100	0	866	DNA topoisomerase 1-like [Fragaria vesca subsp. vesca]
TRINITY_DN8971_c0_g1	TRINITY_DN8971_c0_g1_i1	FvH4_4g16730.1	100	0	1137	DNA topoisomerase 1-like [Fragaria vesca subsp. vesca]
TRINITY_DN13997_c0_g2	TRINITY_DN13997_c0_g2_i2	FvH4_7g01280.1	100	0	2506	DNA topoisomerase 2 [Fragaria vesca subsp. vesca]
TRINITY_DN9442_c0_g1	TRINITY_DN9442_c0_g1_i1	FvH4_5g07080.1	100	0	748	DNA-(apurinic or apyrimidinic site) lyase [Fragaria vesca subsp. vesca]
TRINITY_DN5701_c0_g1	TRINITY_DN5701_c0_g1_i9	FvH4_6g21980.1	100	3e-57	199	DNA-3-methyladenine glycosylase isoform X3 [Fragaria vesca subsp. vesca]
TRINITY_DN1494_c0_g1	TRINITY_DN1494_c0_g1_i3	FvH4_3g06230.1	100	6e-61	201	DNA-binding protein DDB_G0278111 isoform X2 [Fragaria vesca subsp. vesca]
TRINITY_DN2198_c0_g3	TRINITY_DN2198_c0_g3_i2	FvH4_3g20470.1	100	0	583	DNA-binding protein HEXBP-like [Fragaria vesca subsp. vesca]
TRINITY_DN1619_c0_g1	TRINITY_DN1619_c0_g1_i1	FvH4_6g15550.1	100	9e-14	66.2	DNA-binding protein S1FA-like [Fragaria vesca subsp. vesca]
TRINITY_DN11425_c0_g2	TRINITY_DN11425_c0_g2_i1	FvH4_3g43270.1	100	0	737	DNA-damage-repair/toleration protein DRT100 [Fragaria vesca subsp. vesca]
TRINITY_DN3749_c0_g2	TRINITY_DN3749_c0_g2_i1	FvH4_4g37290.1	100	0	1017	DNA-damage-repair/toleration protein DRT100 [Fragaria vesca subsp. vesca]
TRINITY_DN35055_c0_g1	TRINITY_DN35055_c0_g1_i1	FvH4_4g28970.1	100	0	1539	DNA-directed RNA polymerase 1, mitochondrial [Fragaria vesca subsp. vesca]
TRINITY_DN3649_c0_g1	TRINITY_DN3649_c0_g1_i1	FvH4_1g00590.1	100	0	1904	DNA-directed RNA polymerase 3, chloroplastic [Fragaria vesca subsp. vesca]
TRINITY_DN1241_c1_g1	TRINITY_DN1241_c1_g1_i6	FvH4_3g09270.1	100	0	2339	DNA-directed RNA polymerase II subunit RPB2 [Fragaria vesca subsp. vesca]
TRINITY_DN746_c0_g1	TRINITY_DN746_c0_g1_i2	FvH4_6g26920.1	100	3e-118	360	DNA-directed RNA polymerase II subunit RPB7 [Fragaria vesca subsp. vesca]<>DNA-directed RNA polymerase II subunit RPB7 [Fragaria vesca subsp. vesca]<>DNA-directed RNA polymerase II subunit RPB7 [Rosa chinensis]<>DNA-directed RNA polymerase II subunit RPB7 [Rosa chinensis]<>putative DNA-directed RNA polymerase [Rosa chinensis]
TRINITY_DN13865_c0_g1	TRINITY_DN13865_c0_g1_i1	FvH4_3g34290.1	100	0	2816	DNA-directed RNA polymerase III subunit rpc1 [Fragaria vesca subsp. vesca]
TRINITY_DN6721_c0_g1	TRINITY_DN6721_c0_g1_i4	FvH4_1g13700.1	100	0	1150	DNA-directed RNA polymerase III subunit RPC5 [Fragaria vesca subsp. vesca]
TRINITY_DN3927_c0_g1	TRINITY_DN3927_c0_g1_i1	FvH4_4g02580.1	100	7e-134	384	DNA-directed RNA polymerase subunit 7-like protein [Fragaria vesca subsp. vesca]
TRINITY_DN16471_c0_g2	TRINITY_DN16471_c0_g2_i2	FvH4_6g25190.1	100	2e-34	123	DNA-directed RNA polymerase V subunit 5A isoform X3 [Nicotiana tomentosiformis]<>DNA-directed RNA polymerase V subunit 5A isoform X3 [Nicotiana tabacum]
TRINITY_DN6967_c0_g2	TRINITY_DN6967_c0_g2_i1	FvH4_6g25210.1	100	1e-139	429	DNA-directed RNA polymerase V subunit 5A-like [Fragaria vesca subsp. vesca]
TRINITY_DN1674_c0_g1	TRINITY_DN1674_c0_g1_i3	FvH4_4g02510.1	100	2e-123	358	DNA-directed RNA polymerase V subunit 7-like [Fragaria vesca subsp. vesca]<>DNA-directed RNA polymerase V subunit 7-like [Fragaria vesca subsp. vesca]
TRINITY_DN3286_c0_g4	TRINITY_DN3286_c0_g4_i2	FvH4_7g06540.1	100	6e-71	224	DNA-directed RNA polymerases I and III subunit RPAC2-like [Fragaria vesca subsp. vesca]
TRINITY_DN7339_c0_g1	TRINITY_DN7339_c0_g1_i2	FvH4_4g32930.1	100	1e-32	122	DNA-directed RNA polymerases I, II, and III subunit RPABC5 isoform X1 [Theobroma cacao]
TRINITY_DN17606_c0_g2	TRINITY_DN17606_c0_g2_i1	FvH4_5g21560.1	100	4e-77	230	DNA-directed RNA polymerases II and IV subunit 5A-like [Fragaria vesca subsp. vesca]
TRINITY_DN3552_c0_g1	TRINITY_DN3552_c0_g1_i2	FvH4_7g05580.1	100	3e-68	225	DNA-directed RNA polymerases II and V subunit 8A-like [Fragaria vesca subsp. vesca]
TRINITY_DN15257_c0_g2	TRINITY_DN15257_c0_g2_i1	FvH4_2g05450.1	100	0	654	DNA-directed RNA polymerases II, IV and V subunit 3 [Fragaria vesca subsp. vesca]
TRINITY_DN14309_c0_g2	TRINITY_DN14309_c0_g2_i1	FvH4_1g06870.1	100	0	2032	DNA-directed RNA polymerases IV and V subunit 2-like [Fragaria vesca subsp. vesca]
TRINITY_DN5818_c0_g2	TRINITY_DN5818_c0_g2_i1	FvH4_4g23600.1	100	0	770	DNAJ heat shock N-terminal domain-containing protein, putative isoform 1 \\ 0.00E+00 \\ 59.45 %
TRINITY_DN57627_c0_g3	TRINITY_DN57627_c0_g3_i1	FvH4_5g29110.1	100	5e-93	225	dnaJ homolog subfamily A member 1 homolog [Fragaria vesca subsp. vesca]
TRINITY_DN16684_c0_g3	TRINITY_DN16684_c0_g3_i7	FvH4_5g27290.1	100	3e-67	227	dnaJ homolog subfamily C member 8 [Rosa chinensis]<>putative DnaJ domain-containing protein [Rosa chinensis]
TRINITY_DN4695_c0_g1	TRINITY_DN4695_c0_g1_i1	FvH4_7g30440.1	100	0	618	dnaJ protein ERDJ2A-like [Fragaria vesca subsp. vesca]
TRINITY_DN2002_c0_g1	TRINITY_DN2002_c0_g1_i1	FvH4_5g39520.1	100	0	645	dnaJ protein ERDJ3B [Fragaria vesca subsp. vesca]
TRINITY_DN3041_c0_g1	TRINITY_DN3041_c0_g1_i6	FvH4_7g34190.1	100	2e-35	132	dnaJ protein ERDJ3B isoform X2 [Fragaria vesca subsp. vesca]
TRINITY_DN26360_c0_g1	TRINITY_DN26360_c0_g1_i1	FvH4_4g22760.1	100	0	763	dnaJ protein homolog [Fragaria vesca subsp. vesca]
TRINITY_DN9165_c0_g1	TRINITY_DN9165_c0_g1_i2	FvH4_7g09580.1	100	0	540	dnaJ protein homolog 2-like [Fragaria vesca subsp. vesca]
TRINITY_DN17091_c0_g1	TRINITY_DN17091_c0_g1_i2	FvH4_6g15690.1	100	0	578	dnaJ protein P58IPK homolog [Fragaria vesca subsp. vesca]
TRINITY_DN4778_c0_g1	TRINITY_DN4778_c0_g1_i1	FvH4_6g30910.1	100	1e-125	394	DNA-repair protein XRCC1 [Fragaria vesca subsp. vesca]
TRINITY_DN68837_c0_g1	TRINITY_DN68837_c0_g1_i1	FvH4_2g14390.1	100	0	548	dof zinc finger protein DOF1.2 [Fragaria vesca subsp. vesca]
TRINITY_DN807_c0_g2	TRINITY_DN807_c0_g2_i2	FvH4_3g08890.1	100	1e-179	533	dof zinc finger protein DOF1.4 [Fragaria vesca subsp. vesca]
TRINITY_DN921_c0_g3	TRINITY_DN921_c0_g3_i1	FvH4_3g04730.1	100	2e-155	464	dof zinc finger protein DOF1.4-like [Fragaria vesca subsp. vesca]
TRINITY_DN7512_c0_g1	TRINITY_DN7512_c0_g1_i2	FvH4_2g40660.1	100	8e-151	437	dof zinc finger protein DOF1.6 [Fragaria vesca subsp. vesca]
TRINITY_DN916_c0_g5	TRINITY_DN916_c0_g5_i1	FvH4_6g32990.1	100	5e-116	360	dof zinc finger protein DOF1.7-like [Fragaria vesca subsp. vesca]
TRINITY_DN1409_c0_g1	TRINITY_DN1409_c0_g1_i3	FvH4_7g32170.1	100	1e-179	519	dof zinc finger protein DOF1.8-like [Fragaria vesca subsp. vesca]
TRINITY_DN916_c0_g1	TRINITY_DN916_c0_g1_i1	FvH4_6g14000.1	100	1e-138	413	dof zinc finger protein DOF2.4 [Fragaria vesca subsp. vesca]
TRINITY_DN3302_c0_g1	TRINITY_DN3302_c0_g1_i1	FvH4_7g22180.1	100	6e-168	488	dof zinc finger protein DOF2.4 isoform X1 [Fragaria vesca subsp. vesca]
TRINITY_DN916_c0_g4	TRINITY_DN916_c0_g4_i2	FvH4_3g35790.1	100	5e-161	481	dof zinc finger protein DOF2.4-like [Fragaria vesca subsp. vesca]
TRINITY_DN2877_c0_g1	TRINITY_DN2877_c0_g1_i1	FvH4_3g08900.1	100	3e-100	316	dof zinc finger protein DOF3.1-like isoform X1 [Fragaria vesca subsp. vesca]
TRINITY_DN916_c0_g6	TRINITY_DN916_c0_g6_i2	FvH4_1g14790.1	100	5e-89	290	dof zinc finger protein DOF3.4 [Fragaria vesca subsp. vesca]
TRINITY_DN1409_c0_g2	TRINITY_DN1409_c0_g2_i2	FvH4_7g17000.1	100	1e-180	525	dof zinc finger protein DOF3.7 [Fragaria vesca subsp. vesca]
TRINITY_DN921_c0_g1	TRINITY_DN921_c0_g1_i1	FvH4_1g14970.1	100	6e-133	394	dof zinc finger protein DOF3.7-like [Fragaria vesca subsp. vesca]
TRINITY_DN651_c0_g3	TRINITY_DN651_c0_g3_i1	FvH4_5g11410.1	100	2e-121	375	dof zinc finger protein DOF4.6-like [Fragaria vesca subsp. vesca]
TRINITY_DN916_c0_g2	TRINITY_DN916_c0_g2_i3	FvH4_3g33660.1	100	7e-164	484	dof zinc finger protein DOF5.3-like [Fragaria vesca subsp. vesca]
TRINITY_DN14844_c0_g1	TRINITY_DN14844_c0_g1_i5	FvH4_5g25900.1	100	0	1174	dolichyl-diphosphooligosaccharide--protein glycosyltransferase subunit 1A [Fragaria vesca subsp. vesca]
TRINITY_DN485_c0_g1	TRINITY_DN485_c0_g1_i1	FvH4_7g22060.1	100	1e-36	133	dolichyl-diphosphooligosaccharide--protein glycosyltransferase subunit 4A isoform X1 [Fragaria vesca subsp. vesca]
TRINITY_DN5640_c0_g1	TRINITY_DN5640_c0_g1_i2	FvH4_6g06830.1	100	1e-16	78.6	dormancy-associated protein homolog 3 isoform X2 \\ 1.20E-13 \\ 85.09 %
TRINITY_DN2734_c0_g1	TRINITY_DN2734_c0_g1_i6	FvH4_6g35330.1	100	4e-38	140	dormancy-associated protein homolog 4-like isoform X1 \\ 2.90E-35 \\ 86.74 %
TRINITY_DN11418_c0_g1	TRINITY_DN11418_c0_g1_i2	FvH4_3g21040.1	100	0	1311	double-strand break repair protein MRE11 [Fragaria vesca subsp. vesca]<>double-strand break repair protein MRE11 [Fragaria vesca subsp. vesca]
TRINITY_DN9712_c0_g1	TRINITY_DN9712_c0_g1_i2	FvH4_6g53980.1	100	0	763	double-stranded RNA-binding protein 5 [Fragaria vesca subsp. vesca]
TRINITY_DN251586_c0_g1	TRINITY_DN251586_c0_g1_i1	FvH4_1g12440.1	100	1e-75	238	dr1-associated corepressor homolog [Fragaria vesca subsp. vesca]
TRINITY_DN404_c0_g1	TRINITY_DN404_c0_g1_i2	FvH4_4g14540.1	100	5e-120	351	dual specificity protein phosphatase 1-like isoform X2 [Fragaria vesca subsp. vesca]
TRINITY_DN6391_c0_g1	TRINITY_DN6391_c0_g1_i2	FvH4_1g06490.1	100	0	766	DUF1005 domain-containing protein
TRINITY_DN289973_c0_g1	TRINITY_DN289973_c0_g1_i1	FvH4_7g15770.1	100	0	559	DUF1191 domain-containing protein
TRINITY_DN231467_c0_g1	TRINITY_DN231467_c0_g1_i1	FvH4_2g23860.1	100	0	915	DUF21 domain-containing protein At4g14240 [Fragaria vesca subsp. vesca]
TRINITY_DN1317_c1_g2	TRINITY_DN1317_c1_g2_i2	FvH4_4g14430.1	100	0	821	DUF21 domain-containing protein At4g14240-like isoform X1 [Fragaria vesca subsp. vesca]
TRINITY_DN20854_c0_g1	TRINITY_DN20854_c0_g1_i1	FvH4_4g22140.1	100	0	542	DUF4228 domain-containing protein \
TRINITY_DN9064_c0_g1	TRINITY_DN9064_c0_g1_i1	FvH4_3g01080.1	100	0	629	DUF506 domain-containing protein \\ 0.00E+00 \\ 76.88 %
TRINITY_DN4148_c0_g1	TRINITY_DN4148_c0_g1_i1	FvH4_4g18540.1	100	2e-39	142	DUF581 family protein \\ 1.50E-17 \\ 72.54 %
TRINITY_DN20419_c0_g1	TRINITY_DN20419_c0_g1_i1	FvH4_6g30170.1	100	1e-57	181	DUF761 domain protein
TRINITY_DN292787_c0_g1	TRINITY_DN292787_c0_g1_i1	FvH4_4g01230.1	100	1e-12	64.3	dyggve-melchior-clausen syndrome protein [Arabidopsis thaliana]<>dyggve-melchior-clausen syndrome protein [Arabidopsis thaliana]
TRINITY_DN11698_c0_g1	TRINITY_DN11698_c0_g1_i1	FvH4_4g33500.1	100	0	1248	dynamin-related protein 1C [Fragaria vesca subsp. vesca]
TRINITY_DN7007_c0_g1	TRINITY_DN7007_c0_g1_i7	FvH4_2g41330.1	100	0	1080	dynamin-related protein 3A-like [Fragaria vesca subsp. vesca]
TRINITY_DN15993_c0_g1	TRINITY_DN15993_c0_g1_i1	FvH4_7g03440.1	100	0	1346	dynamin-related protein 4C-like [Fragaria vesca subsp. vesca]
TRINITY_DN20909_c0_g1	TRINITY_DN20909_c0_g1_i1	FvH4_4g34670.1	100	0	1151	dynamin-related protein 4C-like [Fragaria vesca subsp. vesca]
TRINITY_DN32289_c0_g1	TRINITY_DN32289_c0_g1_i1	FvH4_7g03780.1	100	2e-133	379	dynamin-related protein 4C-like [Rosa chinensis]<>putative dynamin central domain, dynamin, GTPase domain, GTPase effector domain, Dynamin superfamily [Rosa chinensis]
TRINITY_DN120090_c0_g1	TRINITY_DN120090_c0_g1_i1	FvH4_3g03950.1	100	9e-35	119	dynein light chain 1, cytoplasmic-like [Fragaria vesca subsp. vesca]
TRINITY_DN6652_c0_g1	TRINITY_DN6652_c0_g1_i2	FvH4_4g06750.1	100	1e-50	178	E2F-associated phosphoprotein [Fragaria vesca subsp. vesca]
TRINITY_DN14033_c0_g3	TRINITY_DN14033_c0_g3_i2	FvH4_3g19260.1	100	1e-165	501	E3 SUMO-protein ligase MMS21 [Rosa chinensis]<>putative E3 SUMO-protein ligase Nse2 (Mms21) [Rosa chinensis]
TRINITY_DN1393_c1_g1	TRINITY_DN1393_c1_g1_i2	FvH4_3g29040.1	100	4e-172	496	E3 ubiquitin ligase BIG BROTHER-like [Fragaria vesca subsp. vesca]
TRINITY_DN14460_c0_g1	TRINITY_DN14460_c0_g1_i1	FvH4_5g15260.1	100	5e-133	380	E3 ubiquitin ligase BIG BROTHER-like [Fragaria vesca subsp. vesca]
TRINITY_DN11344_c0_g1	TRINITY_DN11344_c0_g1_i1	FvH4_5g13270.1	100	0	776	E3 ubiquitin ligase BIG BROTHER-related-like [Fragaria vesca subsp. vesca]
TRINITY_DN2369_c0_g1	TRINITY_DN2369_c0_g1_i3	FvH4_3g42300.1	100	0	577	E3 ubiquitin-protein ligase At1g63170 [Fragaria vesca subsp. vesca]
TRINITY_DN8595_c0_g2	TRINITY_DN8595_c0_g2_i1	FvH4_3g08230.1	100	0	547	E3 ubiquitin-protein ligase At1g63170-like [Fragaria vesca subsp. vesca]
TRINITY_DN7781_c1_g1	TRINITY_DN7781_c1_g1_i2	FvH4_5g02790.1	100	2e-40	139	E3 ubiquitin-protein ligase At3g02290 [Fragaria vesca subsp. vesca]
TRINITY_DN170198_c0_g1	TRINITY_DN170198_c0_g1_i1	FvH4_1g20110.1	100	0	644	E3 ubiquitin-protein ligase ATL31-like [Fragaria vesca subsp. vesca]
TRINITY_DN204_c2_g2	TRINITY_DN204_c2_g2_i3	FvH4_7g08860.1	100	1e-157	465	E3 ubiquitin-protein ligase ATL4 [Fragaria vesca subsp. vesca]
TRINITY_DN12150_c0_g1	TRINITY_DN12150_c0_g1_i1	FvH4_1g05750.1	100	0	660	E3 ubiquitin-protein ligase ATL42 [Fragaria vesca subsp. vesca]
TRINITY_DN3436_c1_g2	TRINITY_DN3436_c1_g2_i2	FvH4_7g09510.1	100	0	1662	E3 ubiquitin-protein ligase BRE1-like 1 [Fragaria vesca subsp. vesca]
TRINITY_DN7168_c0_g1	TRINITY_DN7168_c0_g1_i1	FvH4_2g38280.1	100	1e-154	466	E3 ubiquitin-protein ligase CIP8 [Fragaria vesca subsp. vesca]
TRINITY_DN1788_c0_g1	TRINITY_DN1788_c0_g1_i8	FvH4_5g22570.1	100	0	1387	E3 ubiquitin-protein ligase COP1 [Fragaria vesca subsp. vesca]<>E3 ubiquitin-protein ligase COP1 [Fragaria vesca subsp. vesca]
TRINITY_DN4884_c0_g1	TRINITY_DN4884_c0_g1_i8	FvH4_3g12010.1	100	2e-153	476	E3 ubiquitin-protein ligase HEL2 [Fragaria vesca subsp. vesca]<>E3 ubiquitin-protein ligase HEL2 [Fragaria vesca subsp. vesca]
TRINITY_DN19710_c0_g1	TRINITY_DN19710_c0_g1_i4	FvH4_4g03710.1	100	0	1809	E3 ubiquitin-protein ligase HERC2
TRINITY_DN47629_c0_g11	TRINITY_DN47629_c0_g1_i11	FvH4_7g03470.1	100	0	1360	E3 ubiquitin-protein ligase KEG isoform X2 [Fragaria vesca subsp. vesca]
TRINITY_DN1042_c2_g1	TRINITY_DN1042_c2_g1_i1	FvH4_6g29550.1	100	0	1170	E3 ubiquitin-protein ligase KEG-like [Fragaria vesca subsp. vesca]
TRINITY_DN409_c0_g1	TRINITY_DN409_c0_g1_i1	FvH4_6g12450.1	100	7e-81	263	E3 ubiquitin-protein ligase MARCH2-like
TRINITY_DN1141_c0_g1	TRINITY_DN1141_c0_g1_i8	FvH4_5g24020.1	100	0	1666	E3 ubiquitin-protein ligase ORTHRUS 2-like [Fragaria vesca subsp. vesca]
TRINITY_DN3643_c0_g1	TRINITY_DN3643_c0_g1_i3	FvH4_4g00570.1	100	0	596	E3 ubiquitin-protein ligase PRT1-like [Fragaria vesca subsp. vesca]
TRINITY_DN11416_c0_g1	TRINITY_DN11416_c0_g1_i1	FvH4_6g20400.1	100	0	778	E3 ubiquitin-protein ligase PUB23 [Fragaria vesca subsp. vesca]
TRINITY_DN1715_c0_g1	TRINITY_DN1715_c0_g1_i1	FvH4_2g35860.1	100	1e-121	364	E3 ubiquitin-protein ligase PUB23 [Fragaria vesca subsp. vesca]
TRINITY_DN170558_c0_g1	TRINITY_DN170558_c0_g1_i1	FvH4_7g08000.1	100	0	849	E3 ubiquitin-protein ligase PUB23-like [Fragaria vesca subsp. vesca]
TRINITY_DN7285_c2_g2	TRINITY_DN7285_c2_g2_i1	FvH4_3g26390.1	100	0	813	E3 ubiquitin-protein ligase PUB23-like [Fragaria vesca subsp. vesca]
TRINITY_DN323100_c0_g1	TRINITY_DN323100_c0_g1_i1	FvH4_3g26340.1	100	0	867	E3 ubiquitin-protein ligase PUB23-like isoform X1 [Fragaria vesca subsp. vesca]
TRINITY_DN15033_c0_g1	TRINITY_DN15033_c0_g1_i1	FvH4_6g20390.1	100	0	820	E3 ubiquitin-protein ligase PUB24 [Fragaria vesca subsp. vesca]
TRINITY_DN5495_c0_g1	TRINITY_DN5495_c0_g1_i7	FvH4_1g24670.1	100	2e-179	529	E3 ubiquitin-protein ligase RGLG1 isoform X1 [Fragaria vesca subsp. vesca]<>E3 ubiquitin-protein ligase RGLG1 isoform X1 [Fragaria vesca subsp. vesca]<>E3 ubiquitin-protein ligase RGLG1 isoform X1 [Fragaria vesca subsp. vesca]
TRINITY_DN1044_c2_g1	TRINITY_DN1044_c2_g1_i5	FvH4_3g13940.1	100	0	634	E3 ubiquitin-protein ligase RGLG2 isoform X2 [Fragaria vesca subsp. vesca]
TRINITY_DN1006_c0_g2	TRINITY_DN1006_c0_g2_i1	FvH4_5g02880.1	100	5e-111	320	E3 ubiquitin-protein ligase RHA1B [Fragaria vesca subsp. vesca]
TRINITY_DN3097_c2_g1	TRINITY_DN3097_c2_g1_i1	FvH4_1g11280.1	100	2e-85	253	E3 ubiquitin-protein ligase RHA2A
TRINITY_DN25921_c2_g1	TRINITY_DN25921_c2_g1_i1	FvH4_4g26470.1	100	3e-83	254	E3 ubiquitin-protein ligase RHA2A [Fragaria vesca subsp. vesca]
TRINITY_DN1204_c0_g1	TRINITY_DN1204_c0_g1_i1	FvH4_3g36860.1	100	0	605	E3 ubiquitin-protein ligase RING1 [Fragaria vesca subsp. vesca]
TRINITY_DN130_c0_g1	TRINITY_DN130_c0_g1_i2	FvH4_5g18350.1	100	0	587	E3 ubiquitin-protein ligase RING1-like [Fragaria vesca subsp. vesca]
TRINITY_DN1594_c0_g2	TRINITY_DN1594_c0_g2_i1	FvH4_7g22850.1	100	0	590	E3 ubiquitin-protein ligase RING1-like [Fragaria vesca subsp. vesca]
TRINITY_DN18895_c1_g1	TRINITY_DN18895_c1_g1_i1	FvH4_6g48340.1	100	1e-57	189	E3 ubiquitin-protein ligase RING1-like [Fragaria vesca subsp. vesca]
TRINITY_DN260924_c0_g1	TRINITY_DN260924_c0_g1_i1	FvH4_6g13340.1	100	0	578	E3 ubiquitin-protein ligase RING1-like [Fragaria vesca subsp. vesca]
TRINITY_DN40820_c0_g1	TRINITY_DN40820_c0_g1_i2	FvH4_2g38690.1	100	8e-170	492	E3 ubiquitin-protein ligase RING1-like [Fragaria vesca subsp. vesca]<>E3 ubiquitin-protein ligase RING1-like [Fragaria vesca subsp. vesca]<>E3 ubiquitin-protein ligase RING1-like [Fragaria vesca subsp. vesca]
TRINITY_DN3308_c0_g1	TRINITY_DN3308_c0_g1_i2	FvH4_3g20120.1	100	6e-159	473	E3 ubiquitin-protein ligase RMA3 [Fragaria vesca subsp. vesca]
TRINITY_DN7748_c0_g1	TRINITY_DN7748_c0_g1_i1	FvH4_5g09840.1	100	0	538	E3 ubiquitin-protein ligase RNF13-like isoform X2 [Fragaria vesca subsp. vesca]
TRINITY_DN298390_c0_g1	TRINITY_DN298390_c0_g1_i1	FvH4_4g29590.1	100	1e-45	153	E3 ubiquitin-protein ligase RNF181-like [Fragaria vesca subsp. vesca]
TRINITY_DN299500_c0_g1	TRINITY_DN299500_c0_g1_i1	FvH4_1g06030.1	100	4e-70	215	E3 ubiquitin-protein ligase RNF181-like [Fragaria vesca subsp. vesca]
TRINITY_DN4584_c2_g1	TRINITY_DN4584_c2_g1_i1	FvH4_1g14110.1	100	1e-161	469	E3 ubiquitin-protein ligase RNF185-like [Fragaria vesca subsp. vesca]
TRINITY_DN22713_c0_g1	TRINITY_DN22713_c0_g1_i4	FvH4_6g11510.1	100	4e-125	372	E3 ubiquitin-protein ligase RNF8 [Fragaria vesca subsp. vesca]
TRINITY_DN5935_c0_g10	TRINITY_DN5935_c0_g1_i10	FvH4_7g26260.1	100	2e-144	444	E3 ubiquitin-protein ligase RNFT1-like [Rosa chinensis]<>putative transcription factor C2H2 family [Rosa chinensis]
TRINITY_DN9240_c0_g1	TRINITY_DN9240_c0_g1_i2	FvH4_6g14890.1	100	1e-141	414	E3 ubiquitin-protein ligase SGR9, amyloplastic [Fragaria vesca subsp. vesca]
TRINITY_DN2556_c1_g1	TRINITY_DN2556_c1_g1_i1	FvH4_1g29100.1	100	0	598	E3 ubiquitin-protein ligase SINA-like 10 isoform X1 [Fragaria vesca subsp. vesca]
TRINITY_DN5142_c0_g1	TRINITY_DN5142_c0_g1_i4	FvH4_5g05210.1	100	2e-113	357	E3 ubiquitin-protein ligase SIS3 [Fragaria vesca subsp. vesca]
TRINITY_DN4101_c0_g1	TRINITY_DN4101_c0_g1_i2	FvH4_4g17570.1	100	3e-164	498	E3 ubiquitin-protein ligase Topors isoform X2 [Fragaria vesca subsp. vesca]
TRINITY_DN1733_c0_g1	TRINITY_DN1733_c0_g1_i5	FvH4_2g01290.1	100	0	3019	E3 ubiquitin-protein ligase UPL3 [Fragaria vesca subsp. vesca]
TRINITY_DN8191_c0_g1	TRINITY_DN8191_c0_g1_i1	FvH4_6g15270.1	100	0	3043	E3 ubiquitin-protein ligase UPL4 [Fragaria vesca subsp. vesca]
TRINITY_DN5114_c0_g1	TRINITY_DN5114_c0_g1_i1	FvH4_6g42420.1	100	2e-107	347	EamA domain containing protein
TRINITY_DN10846_c0_g1	TRINITY_DN10846_c0_g1_i3	FvH4_5g03930.1	100	9e-125	362	early nodulin-like protein 3 [Fragaria vesca subsp. vesca]
TRINITY_DN9812_c0_g1	TRINITY_DN9812_c0_g1_i1	FvH4_3g21980.1	100	3e-81	250	early nodulin-like protein 3 [Fragaria vesca subsp. vesca]
TRINITY_DN1013_c0_g2	TRINITY_DN1013_c0_g2_i5	FvH4_7g00100.1	100	6e-50	171	ecotropic viral integration site protein
TRINITY_DN4234_c0_g1	TRINITY_DN4234_c0_g1_i1	FvH4_1g07280.1	100	0	897	ectonucleotide pyrophosphatase/phosphodiesterase family member 3 [Fragaria vesca subsp. vesca]
TRINITY_DN5609_c0_g1	TRINITY_DN5609_c0_g1_i1	FvH4_2g29730.1	100	8e-65	205	EG45-like domain containing protein [Fragaria vesca subsp. vesca]<>EG45-like domain containing protein [Fragaria vesca subsp. vesca]
TRINITY_DN201466_c0_g1	TRINITY_DN201466_c0_g1_i1	FvH4_5g02500.1	100	2e-94	277	egg cell-secreted protein 1.1-like
TRINITY_DN2032_c0_g1	TRINITY_DN2032_c0_g1_i5	FvH4_6g47430.1	100	3e-169	496	EID1-like F-box protein 2 [Fragaria vesca subsp. vesca]<>EID1-like F-box protein 2 [Fragaria vesca subsp. vesca]<>EID1-like F-box protein 2 [Fragaria vesca subsp. vesca]
TRINITY_DN15524_c0_g1	TRINITY_DN15524_c0_g1_i1	FvH4_2g23930.1	100	0	546	EID1-like F-box protein 3 [Fragaria vesca subsp. vesca]
TRINITY_DN4140_c2_g1	TRINITY_DN4140_c2_g1_i1	FvH4_1g03130.1	100	0	1254	EIN3-binding F-box protein 1-like [Fragaria vesca subsp. vesca]
TRINITY_DN545_c0_g1	TRINITY_DN545_c0_g1_i1	FvH4_4g10960.1	100	0	1003	electron transfer flavoprotein-ubiquinone oxidoreductase, mitochondrial isoform X3 [Fragaria vesca subsp. vesca]
TRINITY_DN12554_c0_g1	TRINITY_DN12554_c0_g1_i1	FvH4_6g13620.1	100	1e-110	320	elicitor-responsive protein 1-like [Fragaria vesca subsp. vesca]
TRINITY_DN333216_c0_g1	TRINITY_DN333216_c0_g1_i1	FvH4_7g13480.1	100	3e-91	271	elicitor-responsive protein 3-like [Rosa chinensis]<>putative C2 domain-containing protein [Rosa chinensis]
TRINITY_DN6777_c0_g1	TRINITY_DN6777_c0_g1_i2	FvH4_4g32210.1	100	1e-113	353	ELL-associated factor 1 [Fragaria vesca subsp. vesca]
TRINITY_DN1628_c0_g1	TRINITY_DN1628_c0_g1_i2	FvH4_7g10390.1	100	7e-73	243	ELMO domain-containing protein C isoform X2 [Fragaria vesca subsp. vesca]
TRINITY_DN15876_c0_g1	TRINITY_DN15876_c0_g1_i2	FvH4_7g02340.1	100	3e-44	162	elongation factor 1-alpha-like [Olea europaea var. sylvestris]
TRINITY_DN5659_c0_g1	TRINITY_DN5659_c0_g1_i1	FvH4_4g13950.1	100	5e-107	324	elongation factor 1-beta 2-like [Fragaria vesca subsp. vesca]
TRINITY_DN179_c0_g2	TRINITY_DN179_c0_g2_i1	FvH4_5g32590.1	100	0	765	elongation factor 1-gamma-like [Fragaria vesca subsp. vesca]
TRINITY_DN5699_c0_g1	TRINITY_DN5699_c0_g1_i2	FvH4_5g00390.1	100	0	1536	elongation factor G-2, chloroplastic [Fragaria vesca subsp. vesca]
TRINITY_DN12221_c0_g1	TRINITY_DN12221_c0_g1_i1	FvH4_3g28810.1	100	0	792	elongation factor Ts, mitochondrial [Fragaria vesca subsp. vesca]
TRINITY_DN2010_c1_g1	TRINITY_DN2010_c1_g1_i1	FvH4_5g06350.1	100	0	807	elongation factor Tu, chloroplastic [Fragaria vesca subsp. vesca]
TRINITY_DN11620_c0_g1	TRINITY_DN11620_c0_g1_i4	FvH4_2g24070.1	100	0	886	elongation factor Tu, mitochondrial [Fragaria vesca subsp. vesca]
TRINITY_DN2798_c0_g2	TRINITY_DN2798_c0_g2_i1	FvH4_1g14100.1	100	0	618	elongation of fatty acids protein 3-like [Fragaria vesca subsp. vesca]
TRINITY_DN8088_c0_g1	TRINITY_DN8088_c0_g1_i1	FvH4_2g40350.1	100	3e-154	446	elongation of fatty acids protein 3-like [Fragaria vesca subsp. vesca]
TRINITY_DN251102_c0_g1	TRINITY_DN251102_c0_g1_i1	FvH4_7g20490.1	100	2e-45	147	elongin-A-like [Fragaria vesca subsp. vesca]
TRINITY_DN19772_c0_g2	TRINITY_DN19772_c0_g2_i8	FvH4_2g17880.1	100	0	707	embryonic stem cell-specific 5-hydroxymethylcytosine-binding protein isoform X2 [Fragaria vesca subsp. vesca]
TRINITY_DN9437_c0_g1	TRINITY_DN9437_c0_g1_i3	FvH4_3g34350.1	100	6e-126	373	embryo-specific protein ATS3A-like
TRINITY_DN301211_c0_g1	TRINITY_DN301211_c0_g1_i1	FvH4_6g11180.1	100	9e-61	187	em-like protein GEA1 [Fragaria vesca subsp. vesca]
TRINITY_DN24_c0_g2	TRINITY_DN24_c0_g2_i1	FvH4_4g14320.1	100	6e-175	492	endo-1,3;1,4-beta-D-glucanase-like [Fragaria vesca subsp. vesca]
TRINITY_DN21273_c0_g1	TRINITY_DN21273_c0_g1_i1	FvH4_2g16190.1	100	0	613	endochitinase 2-like [Fragaria vesca subsp. vesca]
TRINITY_DN10252_c0_g1	TRINITY_DN10252_c0_g1_i1	FvH4_6g11590.1	100	2e-131	407	endochitinase A-like [Fragaria vesca subsp. vesca]
TRINITY_DN1970_c0_g1	TRINITY_DN1970_c0_g1_i1	FvH4_4g10610.1	100	1e-166	470	endochitinase EP3-like
TRINITY_DN21259_c0_g1	TRINITY_DN21259_c0_g1_i1	FvH4_2g38670.1	100	0	966	endoglucanase 10-like [Fragaria vesca subsp. vesca]
TRINITY_DN235654_c0_g1	TRINITY_DN235654_c0_g1_i1	FvH4_3g23380.1	100	0	989	endoglucanase 11-like [Fragaria vesca subsp. vesca]
TRINITY_DN121_c1_g2	TRINITY_DN121_c1_g2_i4	FvH4_2g25990.1	100	0	808	endoglucanase 17 [Fragaria vesca subsp. vesca]
TRINITY_DN17749_c0_g1	TRINITY_DN17749_c0_g1_i1	FvH4_2g10330.1	100	0	931	endoglucanase 24-like [Fragaria vesca subsp. vesca]
TRINITY_DN8532_c1_g1	TRINITY_DN8532_c1_g1_i4	FvH4_5g27130.1	100	0	744	endoglucanase 25 [Fragaria vesca subsp. vesca]
TRINITY_DN21441_c0_g1	TRINITY_DN21441_c0_g1_i2	FvH4_3g04360.1	100	0	643	endonuclease 1 [Fragaria vesca subsp. vesca]
TRINITY_DN13517_c0_g1	TRINITY_DN13517_c0_g1_i3	FvH4_2g10160.1	100	0	595	endophilin-A1-like [Fragaria vesca subsp. vesca]
TRINITY_DN7251_c0_g1	TRINITY_DN7251_c0_g1_i6	FvH4_4g23910.1	100	0	657	endoplasmic reticulum metallopeptidase 1 [Fragaria vesca subsp. vesca]
TRINITY_DN1612_c1_g1	TRINITY_DN1612_c1_g1_i2	FvH4_3g05200.1	100	0	706	endoplasmic reticulum oxidoreductin-2-like [Fragaria vesca subsp. vesca]
TRINITY_DN8414_c0_g1	TRINITY_DN8414_c0_g1_i1	FvH4_3g05180.1	100	0	654	endoplasmic reticulum oxidoreductin-2-like [Fragaria vesca subsp. vesca]
TRINITY_DN1965_c3_g1	TRINITY_DN1965_c3_g1_i1	FvH4_2g38300.1	100	0	1403	endoplasmin homolog [Fragaria vesca subsp. vesca]
TRINITY_DN16139_c0_g1	TRINITY_DN16139_c0_g1_i3	FvH4_4g30650.1	100	0	960	ENHANCED DISEASE RESISTANCE 2 \\ 0.00E+00 \\ 84.51 %
TRINITY_DN55239_c0_g1	TRINITY_DN55239_c0_g1_i1	FvH4_6g36310.1	100	0	860	enhancer of polycomb homolog 2-like [Fragaria vesca subsp. vesca]
TRINITY_DN2502_c0_g5	TRINITY_DN2502_c0_g5_i1	FvH4_3g22840.1	100	2e-155	462	Enolase 1
TRINITY_DN117539_c0_g1	TRINITY_DN117539_c0_g1_i1	FvH4_1g20560.1	100	1e-84	256	EPIDERMAL PATTERNING FACTOR-like protein 1 [Fragaria vesca subsp. vesca]
TRINITY_DN5712_c0_g5	TRINITY_DN5712_c0_g5_i1	FvH4_6g33980.1	100	1e-91	274	EPIDERMAL PATTERNING FACTOR-like protein 1 [Fragaria vesca subsp. vesca]
TRINITY_DN12667_c0_g1	TRINITY_DN12667_c0_g1_i1	FvH4_1g18570.1	100	5e-53	177	EPIDERMAL PATTERNING FACTOR-like protein 2 [Fragaria vesca subsp. vesca]
TRINITY_DN19808_c0_g1	TRINITY_DN19808_c0_g1_i3	FvH4_2g35090.1	100	1e-85	261	EPIDERMAL PATTERNING FACTOR-like protein 2 isoform X1 [Fragaria vesca subsp. vesca]
TRINITY_DN4730_c0_g2	TRINITY_DN4730_c0_g2_i1	FvH4_4g01110.1	100	3e-58	159	EPIDERMAL PATTERNING FACTOR-like protein 4 [Fragaria vesca subsp. vesca]
TRINITY_DN292795_c0_g1	TRINITY_DN292795_c0_g1_i1	FvH4_1g07850.1	100	1e-77	234	EPIDERMAL PATTERNING FACTOR-like protein 6 [Fragaria vesca subsp. vesca]
TRINITY_DN10394_c0_g1	TRINITY_DN10394_c0_g1_i1	FvH4_1g03100.1	100	2e-57	186	EPIDERMAL PATTERNING FACTOR-like protein 8 [Fragaria vesca subsp. vesca]
TRINITY_DN12803_c0_g1	TRINITY_DN12803_c0_g1_i1	FvH4_2g17950.1	100	3e-62	199	EPIDERMAL PATTERNING FACTOR-like protein 9 [Fragaria vesca subsp. vesca]
TRINITY_DN3850_c2_g1	TRINITY_DN3850_c2_g1_i4	FvH4_2g10480.1	100	5e-125	376	epimerase family protein SDR39U1 homolog, chloroplastic isoform X1 [Fragaria vesca subsp. vesca]
TRINITY_DN26328_c0_g1	TRINITY_DN26328_c0_g1_i3	FvH4_3g03750.1	100	0	589	equilibrative nucleotide transporter 3-like isoform X2 [Fragaria vesca subsp. vesca]
TRINITY_DN27271_c0_g1	TRINITY_DN27271_c0_g1_i1	FvH4_1g03060.1	100	0	703	equilibrative nucleotide transporter 8 [Fragaria vesca subsp. vesca]
TRINITY_DN6473_c0_g1	TRINITY_DN6473_c0_g1_i2	FvH4_2g18780.1	100	3e-136	411	ER lumen protein-retaining receptor [Fragaria vesca subsp. vesca]
TRINITY_DN10133_c0_g1	TRINITY_DN10133_c0_g1_i1	FvH4_2g35850.1	100	0	1913	ER membrane protein complex subunit 1 [Fragaria vesca subsp. vesca]
TRINITY_DN4866_c0_g1	TRINITY_DN4866_c0_g1_i1	FvH4_6g03340.1	100	0	603	ER membrane protein complex subunit 2 [Fragaria vesca subsp. vesca]
TRINITY_DN3342_c0_g1	TRINITY_DN3342_c0_g1_i3	FvH4_6g27370.1	100	8e-116	353	ER membrane protein complex subunit 4-like [Fragaria vesca subsp. vesca]
TRINITY_DN611_c0_g1	TRINITY_DN611_c0_g1_i4	FvH4_5g17420.1	100	0	1266	ERAD-associated E3 ubiquitin-protein ligase component HRD3A [Fragaria vesca subsp. vesca]
TRINITY_DN5981_c0_g1	TRINITY_DN5981_c0_g1_i5	FvH4_1g23240.1	100	0	1231	ethylene receptor [Fragaria vesca subsp. vesca]
TRINITY_DN15389_c0_g1	TRINITY_DN15389_c0_g1_i3	FvH4_2g26120.1	100	0	1208	ethylene response sensor 1 [Fragaria vesca subsp. vesca]
TRINITY_DN14042_c0_g11	TRINITY_DN14042_c0_g1_i21	FvH4_3g39300.1	100	0	1852	ethylene-overproduction protein 1-like [Fragaria vesca subsp. vesca]
TRINITY_DN6944_c0_g1	TRINITY_DN6944_c0_g1_i1	FvH4_7g10080.1	100	5e-137	393	ethylene-responsive transcription factor 13-like [Fragaria vesca subsp. vesca]
TRINITY_DN24531_c0_g2	TRINITY_DN24531_c0_g2_i1	FvH4_4g03470.1	100	0	527	ethylene-responsive transcription factor 1B [Fragaria vesca subsp. vesca]
TRINITY_DN6926_c0_g1	TRINITY_DN6926_c0_g1_i1	FvH4_2g21550.1	100	1e-166	474	ethylene-responsive transcription factor 1B [Fragaria vesca subsp. vesca]
TRINITY_DN5780_c0_g1	TRINITY_DN5780_c0_g1_i1	FvH4_7g10040.1	100	3e-126	366	ethylene-responsive transcription factor 1-like [Fragaria vesca subsp. vesca]
TRINITY_DN6321_c0_g3	TRINITY_DN6321_c0_g3_i1	FvH4_7g10030.1	100	5e-125	367	ethylene-responsive transcription factor 2-like
TRINITY_DN113_c4_g1	TRINITY_DN113_c4_g1_i1	FvH4_7g26920.1	100	4e-172	496	ethylene-responsive transcription factor 2-like [Fragaria vesca subsp. vesca]
TRINITY_DN15604_c0_g1	TRINITY_DN15604_c0_g1_i1	FvH4_2g22290.1	100	6e-89	267	ethylene-responsive transcription factor 3-like
TRINITY_DN1418_c0_g1	TRINITY_DN1418_c0_g1_i2	FvH4_3g23440.1	100	4e-99	311	ethylene-responsive transcription factor 3-like [Fragaria vesca subsp. vesca]
TRINITY_DN1418_c0_g2	TRINITY_DN1418_c0_g2_i1	FvH4_5g19800.1	100	0	535	ethylene-responsive transcription factor 5 [Fragaria vesca subsp. vesca]
TRINITY_DN6203_c0_g2	TRINITY_DN6203_c0_g2_i3	FvH4_2g13240.1	100	7e-75	255	ethylene-responsive transcription factor ABR1-like isoform X1 [Fragaria vesca subsp. vesca]
TRINITY_DN8973_c0_g1	TRINITY_DN8973_c0_g1_i1	FvH4_7g15860.1	100	2e-170	486	ethylene-responsive transcription factor CRF2 [Fragaria vesca subsp. vesca]
TRINITY_DN2642_c0_g1	TRINITY_DN2642_c0_g1_i1	FvH4_7g30930.1	100	0	729	ethylene-responsive transcription factor CRF4 [Fragaria vesca subsp. vesca]
TRINITY_DN10630_c0_g1	TRINITY_DN10630_c0_g1_i2	FvH4_2g40810.1	100	2e-104	317	ethylene-responsive transcription factor ERF003-like [Fragaria vesca subsp. vesca]
TRINITY_DN232517_c0_g1	TRINITY_DN232517_c0_g1_i1	FvH4_6g28880.1	100	4e-130	372	ethylene-responsive transcription factor ERF003-like [Fragaria vesca subsp. vesca]
TRINITY_DN1339_c0_g1	TRINITY_DN1339_c0_g1_i1	FvH4_1g16370.1	100	2e-56	182	ethylene-responsive transcription factor ERF010-like
TRINITY_DN17882_c0_g1	TRINITY_DN17882_c0_g1_i1	FvH4_2g26630.1	100	8e-120	363	ethylene-responsive transcription factor ERF014 [Fragaria vesca subsp. vesca]
TRINITY_DN48032_c0_g1	TRINITY_DN48032_c0_g1_i2	FvH4_5g34550.1	100	8e-102	319	ethylene-responsive transcription factor ERF015 [Fragaria vesca subsp. vesca]
TRINITY_DN27692_c0_g1	TRINITY_DN27692_c0_g1_i1	FvH4_1g09180.1	100	7e-156	444	ethylene-responsive transcription factor ERF017 [Fragaria vesca subsp. vesca]
TRINITY_DN7967_c0_g1	TRINITY_DN7967_c0_g1_i1	FvH4_5g33180.1	100	4e-87	263	ethylene-responsive transcription factor ERF020 [Fragaria vesca subsp. vesca]
TRINITY_DN325297_c0_g1	TRINITY_DN325297_c0_g1_i1	FvH4_5g33220.1	100	3e-120	355	ethylene-responsive transcription factor ERF021 [Fragaria vesca subsp. vesca]
TRINITY_DN186321_c0_g1	TRINITY_DN186321_c0_g1_i1	FvH4_5g33240.1	100	4e-63	195	ethylene-responsive transcription factor ERF022 [Fragaria vesca subsp. vesca]<>transcription factor ERF12 [Fragaria x ananassa]
TRINITY_DN15838_c0_g3	TRINITY_DN15838_c0_g3_i1	FvH4_7g16810.1	100	1e-105	311	ethylene-responsive transcription factor ERF023 [Fragaria vesca subsp. vesca]
TRINITY_DN7020_c0_g1	TRINITY_DN7020_c0_g1_i1	FvH4_7g28960.1	100	2e-107	323	ethylene-responsive transcription factor ERF027 [Fragaria vesca subsp. vesca]
TRINITY_DN290965_c0_g1	TRINITY_DN290965_c0_g1_i1	FvH4_5g01460.1	100	2e-140	405	ethylene-responsive transcription factor ERF027-like [Fragaria vesca subsp. vesca]
TRINITY_DN72_c0_g4	TRINITY_DN72_c0_g4_i1	FvH4_7g09550.1	100	8e-108	329	ethylene-responsive transcription factor ERF034-like [Fragaria vesca subsp. vesca]
TRINITY_DN5400_c1_g1	TRINITY_DN5400_c1_g1_i1	FvH4_6g26090.1	100	0	723	ethylene-responsive transcription factor ERF054-like [Fragaria vesca subsp. vesca]
TRINITY_DN1423_c0_g1	TRINITY_DN1423_c0_g1_i1	FvH4_5g04470.1	100	8e-166	478	ethylene-responsive transcription factor ERF061 [Fragaria vesca subsp. vesca]
TRINITY_DN8879_c0_g4	TRINITY_DN8879_c0_g4_i1	FvH4_4g10480.1	100	7e-177	494	ethylene-responsive transcription factor ERF091 [Fragaria vesca subsp. vesca]
TRINITY_DN838_c0_g4	TRINITY_DN838_c0_g4_i1	FvH4_4g03460.1	100	1e-59	189	ethylene-responsive transcription factor ERF098 [Fragaria vesca subsp. vesca]
TRINITY_DN6321_c0_g2	TRINITY_DN6321_c0_g2_i1	FvH4_2g21560.1	100	6e-64	202	ethylene-responsive transcription factor ERF098-like [Fragaria vesca subsp. vesca]
TRINITY_DN65492_c0_g1	TRINITY_DN65492_c0_g1_i1	FvH4_2g21580.1	100	1e-38	130	ethylene-responsive transcription factor ERF098-like [Fragaria vesca subsp. vesca]
TRINITY_DN7648_c0_g1	TRINITY_DN7648_c0_g1_i2	FvH4_2g21600.1	100	1e-74	244	ethylene-responsive transcription factor ERF098-like [Fragaria vesca subsp. vesca]
TRINITY_DN9672_c0_g1	TRINITY_DN9672_c0_g1_i1	FvH4_7g26930.1	100	5e-134	392	ethylene-responsive transcription factor ERF105-like [Fragaria vesca subsp. vesca]
TRINITY_DN7383_c0_g1	TRINITY_DN7383_c0_g1_i1	FvH4_2g06060.1	100	1e-132	384	ethylene-responsive transcription factor ERF109-like [Fragaria vesca subsp. vesca]
TRINITY_DN1447_c0_g1	TRINITY_DN1447_c0_g1_i1	FvH4_5g12250.1	100	0	739	ethylene-responsive transcription factor ERF118-like [Fragaria vesca subsp. vesca]<>ethylene-responsive transcription factor ERF118-like [Fragaria vesca subsp. vesca]
TRINITY_DN13222_c0_g1	TRINITY_DN13222_c0_g1_i2	FvH4_6g02490.1	100	1e-140	417	ethylene-responsive transcription factor RAP2-11-like [Fragaria vesca subsp. vesca]<>transcription factor ERF41 [Fragaria x ananassa]
TRINITY_DN57551_c0_g1	TRINITY_DN57551_c0_g1_i5	FvH4_6g35670.1	100	8e-178	546	ethylene-responsive transcription factor RAP2-12-like [Fragaria vesca subsp. vesca]<>ethylene-responsive transcription factor RAP2-12-like [Fragaria vesca subsp. vesca]<>ethylene-responsive transcription factor RAP2-12-like [Fragaria vesca subsp. vesca]<>transcription factor ERF56 [Fragaria x ananassa]
TRINITY_DN1344_c0_g1	TRINITY_DN1344_c0_g1_i3	FvH4_5g37820.1	100	2e-147	449	ethylene-responsive transcription factor RAP2-4 [Fragaria vesca subsp. vesca]
TRINITY_DN1423_c0_g2	TRINITY_DN1423_c0_g2_i1	FvH4_1g21210.1	100	0	527	ethylene-responsive transcription factor RAP2-4-like [Fragaria vesca subsp. vesca]
TRINITY_DN199164_c0_g1	TRINITY_DN199164_c0_g1_i1	FvH4_1g05820.1	100	2e-125	372	ethylene-responsive transcription factor TINY [Fragaria vesca subsp. vesca]
TRINITY_DN20318_c0_g1	TRINITY_DN20318_c0_g1_i1	FvH4_6g32030.1	100	3e-128	378	ethylene-responsive transcription factor TINY [Fragaria vesca subsp. vesca]
TRINITY_DN275_c2_g1	TRINITY_DN275_c2_g1_i3	FvH4_2g18520.1	100	9e-129	390	ethylene-responsive transcription factor-like protein At4g13040 [Fragaria vesca subsp. vesca]
TRINITY_DN239885_c0_g1	TRINITY_DN239885_c0_g1_i1	FvH4_6g34110.1	100	5e-114	327	eukaryotic initiation factor 4A-6-like [Fragaria vesca subsp. vesca]
TRINITY_DN80_c0_g1	TRINITY_DN80_c0_g1_i5	FvH4_6g34120.1	100	0	802	eukaryotic initiation factor 4A-8 [Fragaria vesca subsp. vesca]
TRINITY_DN2682_c0_g12	TRINITY_DN2682_c0_g1_i12	FvH4_5g17000.1	100	0	601	eukaryotic peptide chain release factor GTP-binding subunit ERF3A isoform X3 [Fragaria vesca subsp. vesca]
TRINITY_DN7858_c0_g2	TRINITY_DN7858_c0_g2_i1	FvH4_7g16270.1	100	7e-75	229	eukaryotic translation initiation factor 1A-like [Fragaria vesca subsp. vesca]
TRINITY_DN4394_c0_g1	TRINITY_DN4394_c0_g1_i2	FvH4_4g18420.1	100	0	948	eukaryotic translation initiation factor 2 subunit gamma-like [Fragaria vesca subsp. vesca]<>eukaryotic translation initiation factor 2 subunit gamma-like isoform X1 [Rosa chinensis]<>eukaryotic translation initiation factor 2 subunit gamma-like isoform X1 [Rosa chinensis]<>eukaryotic translation initiation factor 2 subunit gamma-like isoform X1 [Rosa chinensis]<>putative protein-synthesizing GTP…
TRINITY_DN1412_c2_g3	TRINITY_DN1412_c2_g3_i3	FvH4_2g00430.1	100	0	1241	eukaryotic translation initiation factor 2D [Fragaria vesca subsp. vesca]
TRINITY_DN198598_c0_g1	TRINITY_DN198598_c0_g1_i1	FvH4_5g21160.1	100	2e-159	452	eukaryotic translation initiation factor 3 subunit B-like [Fragaria vesca subsp. vesca]
TRINITY_DN7945_c0_g1	TRINITY_DN7945_c0_g1_i2	FvH4_6g00800.1	100	0	1341	eukaryotic translation initiation factor 3 subunit B-like [Fragaria vesca subsp. vesca]
TRINITY_DN10672_c0_g2	TRINITY_DN10672_c0_g2_i2	FvH4_7g17200.1	100	6e-24	99.8	eukaryotic translation initiation factor 3 subunit G-like
TRINITY_DN9736_c0_g1	TRINITY_DN9736_c0_g1_i1	FvH4_3g37030.1	100	5e-121	368	eukaryotic translation initiation factor 3 subunit G-like [Fragaria vesca subsp. vesca]
TRINITY_DN8485_c1_g1	TRINITY_DN8485_c1_g1_i8	FvH4_4g12310.1	100	0	667	eukaryotic translation initiation factor 3 subunit H isoform X2 [Fragaria vesca subsp. vesca]
TRINITY_DN8131_c0_g1	TRINITY_DN8131_c0_g1_i1	FvH4_5g23100.1	100	2e-61	208	eukaryotic translation initiation factor 3 subunit J-A-like [Fragaria vesca subsp. vesca]
TRINITY_DN9504_c0_g1	TRINITY_DN9504_c0_g1_i1	FvH4_1g09390.1	100	6e-160	454	eukaryotic translation initiation factor 3 subunit K [Fragaria vesca subsp. vesca]
TRINITY_DN9411_c0_g1	TRINITY_DN9411_c0_g1_i1	FvH4_2g36000.1	100	0	852	eukaryotic translation initiation factor 3 subunit L-like [Fragaria vesca subsp. vesca]
TRINITY_DN10546_c0_g1	TRINITY_DN10546_c0_g1_i8	FvH4_6g40690.1	100	5e-63	209	eukaryotic translation initiation factor 4E-1-like [Fragaria vesca subsp. vesca]
TRINITY_DN66462_c0_g1	TRINITY_DN66462_c0_g1_i1	FvH4_1g12450.1	100	8e-98	291	eukaryotic translation initiation factor 5B-like [Rosa chinensis]
TRINITY_DN2988_c0_g1	TRINITY_DN2988_c0_g1_i3	FvH4_1g28260.1	100	2e-49	173	eukaryotic translation initiation factor NCBP [Fragaria vesca subsp. vesca]
TRINITY_DN11041_c0_g1	TRINITY_DN11041_c0_g1_i1	FvH4_6g35110.1	100	0	1067	exocyst complex component EXO70A1 [Fragaria vesca subsp. vesca]
TRINITY_DN37401_c0_g1	TRINITY_DN37401_c0_g1_i1	FvH4_2g36720.1	100	0	1303	exocyst complex component EXO70A1 [Fragaria vesca subsp. vesca]
TRINITY_DN14129_c0_g2	TRINITY_DN14129_c0_g2_i1	FvH4_6g14670.1	100	0	1168	exocyst complex component EXO70A1-like [Fragaria vesca subsp. vesca]
TRINITY_DN32077_c0_g1	TRINITY_DN32077_c0_g1_i1	FvH4_4g23180.1	100	0	1390	exocyst complex component EXO70B1 [Fragaria vesca subsp. vesca]
TRINITY_DN6712_c0_g1	TRINITY_DN6712_c0_g1_i2	FvH4_6g46900.1	100	0	1355	exocyst complex component EXO70B1 [Fragaria vesca subsp. vesca]
TRINITY_DN8206_c0_g1	TRINITY_DN8206_c0_g1_i4	FvH4_6g37400.1	100	0	1130	exocyst complex component EXO84B [Fragaria vesca subsp. vesca]
TRINITY_DN11978_c0_g1	TRINITY_DN11978_c0_g1_i3	FvH4_7g15330.1	100	0	1656	exocyst complex component SEC10 [Fragaria vesca subsp. vesca]
TRINITY_DN26734_c0_g2	TRINITY_DN26734_c0_g2_i1	FvH4_5g19480.1	100	0	1626	exocyst complex component SEC15A [Fragaria vesca subsp. vesca]
TRINITY_DN5407_c2_g1	TRINITY_DN5407_c2_g1_i1	FvH4_6g24280.1	100	0	1078	exocyst complex component SEC6 [Fragaria vesca subsp. vesca]
TRINITY_DN276115_c0_g1	TRINITY_DN276115_c0_g1_i1	FvH4_4g18750.1	100	1e-161	457	exopolygalacturonase-like [Fragaria vesca subsp. vesca]
TRINITY_DN9505_c0_g2	TRINITY_DN9505_c0_g2_i1	FvH4_3g31780.1	100	1e-172	493	exosome complex component MTR3 [Fragaria vesca subsp. vesca]
TRINITY_DN23143_c0_g1	TRINITY_DN23143_c0_g1_i1	FvH4_6g40740.1	100	3e-77	255	exosome complex component RRP42 [Fragaria vesca subsp. vesca]
TRINITY_DN323122_c0_g1	TRINITY_DN323122_c0_g1_i1	FvH4_2g38040.1	100	1e-169	481	expansin-A11 [Fragaria vesca subsp. vesca]
TRINITY_DN262682_c0_g1	TRINITY_DN262682_c0_g1_i1	FvH4_3g20110.1	100	0	534	expansin-A12 [Fragaria vesca subsp. vesca]
TRINITY_DN17968_c0_g1	TRINITY_DN17968_c0_g1_i1	FvH4_3g45970.1	100	1e-175	493	expansin-A1-like [Fragaria vesca subsp. vesca]
TRINITY_DN304166_c0_g1	TRINITY_DN304166_c0_g1_i1	FvH4_3g34000.1	100	8e-141	399	expansin-A25-like [Durio zibethinus]
TRINITY_DN5352_c0_g1	TRINITY_DN5352_c0_g1_i1	FvH4_7g22700.1	100	8e-171	492	expansin-A4-like [Fragaria vesca subsp. vesca]
TRINITY_DN8358_c0_g3	TRINITY_DN8358_c0_g3_i1	FvH4_3g40360.1	100	1e-150	430	expansin-A4-like [Fragaria vesca subsp. vesca]
TRINITY_DN6100_c0_g1	TRINITY_DN6100_c0_g1_i1	FvH4_7g10960.1	100	9e-177	499	expansin-B18-like [Fragaria vesca subsp. vesca]
TRINITY_DN2899_c0_g2	TRINITY_DN2899_c0_g2_i7	FvH4_6g26120.1	100	2e-161	461	expansin-B3-like [Fragaria vesca subsp. vesca]
TRINITY_DN2048_c0_g1	TRINITY_DN2048_c0_g1_i5	FvH4_7g33850.1	100	0	1564	exportin-1-like [Fragaria vesca subsp. vesca]
TRINITY_DN18886_c0_g2	TRINITY_DN18886_c0_g2_i1	FvH4_7g16830.1	100	0	1981	exportin-2 [Fragaria vesca subsp. vesca]
TRINITY_DN3071_c0_g1	TRINITY_DN3071_c0_g1_i1	FvH4_3g14440.1	100	4e-76	250	extensin [Fragaria vesca subsp. vesca]
TRINITY_DN5565_c0_g2	TRINITY_DN5565_c0_g2_i2	FvH4_5g17210.1	100	4e-123	391	extensin [Fragaria vesca subsp. vesca]
TRINITY_DN11566_c0_g1	TRINITY_DN11566_c0_g1_i1	FvH4_6g09780.1	100	4e-162	457	Extensin like
TRINITY_DN37476_c0_g1	TRINITY_DN37476_c0_g1_i2	FvH4_3g29310.1	100	3e-44	160	extensin-2-like
TRINITY_DN2155_c1_g1	TRINITY_DN2155_c1_g1_i7	FvH4_4g11660.1	100	2e-80	266	extensin-2-like, partial [Fragaria vesca subsp. vesca]
TRINITY_DN241071_c0_g1	TRINITY_DN241071_c0_g1_i1	FvH4_2g31500.1	100	2e-63	202	extensin-3 [Fragaria vesca subsp. vesca]
TRINITY_DN8163_c0_g1	TRINITY_DN8163_c0_g1_i1	FvH4_4g19250.1	100	1e-30	120	extensin-like [Fragaria vesca subsp. vesca]
TRINITY_DN651_c0_g1	TRINITY_DN651_c0_g1_i6	FvH4_3g03960.1	100	0	1168	external alternative NAD(P)H-ubiquinone oxidoreductase B2, mitochondrial [Fragaria vesca subsp. vesca]
TRINITY_DN231764_c0_g1	TRINITY_DN231764_c0_g1_i1	FvH4_3g23460.1	100	0	812	Extracellular ligand-gated ion channel
TRINITY_DN770_c1_g1	TRINITY_DN770_c1_g1_i3	FvH4_2g07400.1	100	0	1629	extra-large guanine nucleotide-binding protein 1-like [Fragaria vesca subsp. vesca]
TRINITY_DN4939_c0_g1	TRINITY_DN4939_c0_g1_i2	FvH4_6g53120.1	100	0	1845	F28J7.14 protein, putative isoform 1 \\ 0.00E+00 \\ 77.52 %
TRINITY_DN85131_c0_g1	TRINITY_DN85131_c0_g1_i1	FvH4_3g36270.1	100	1e-120	362	factor of DNA methylation 1-like [Fragaria vesca subsp. vesca]
TRINITY_DN176443_c0_g1	TRINITY_DN176443_c0_g1_i1	FvH4_3g36300.1	100	1e-53	176	factor of DNA methylation 4-like isoform X3 [Fragaria vesca subsp. vesca]<>factor of DNA methylation 4-like isoform X3 [Fragaria vesca subsp. vesca]
TRINITY_DN9516_c0_g1	TRINITY_DN9516_c0_g1_i1	FvH4_2g03990.1	100	2e-121	350	FAD-linked sulfhydryl oxidase ERV1 [Fragaria vesca subsp. vesca]
TRINITY_DN259_c0_g1	TRINITY_DN259_c0_g1_i1	FvH4_2g32110.1	100	4e-169	528	far upstream element-binding protein 1 [Fragaria vesca subsp. vesca]
TRINITY_DN4635_c3_g1	TRINITY_DN4635_c3_g1_i1	FvH4_2g06980.1	100	0	947	far upstream element-binding protein 2-like [Fragaria vesca subsp. vesca]
TRINITY_DN2796_c0_g1	TRINITY_DN2796_c0_g1_i1	FvH4_1g24860.1	100	0	832	farnesylcysteine lyase [Fragaria vesca subsp. vesca]
TRINITY_DN295151_c0_g1	TRINITY_DN295151_c0_g1_i1	FvH4_3g29120.1	100	0	645	fasciclin-like arabinogalactan protein 1 [Fragaria vesca subsp. vesca]
TRINITY_DN35151_c0_g1	TRINITY_DN35151_c0_g1_i1	FvH4_7g12120.1	100	0	627	fasciclin-like arabinogalactan protein 10 [Fragaria vesca subsp. vesca]
TRINITY_DN11947_c0_g1	TRINITY_DN11947_c0_g1_i1	FvH4_3g32680.1	100	4e-98	298	fasciclin-like arabinogalactan protein 12 [Fragaria vesca subsp. vesca]
TRINITY_DN9291_c0_g1	TRINITY_DN9291_c0_g1_i1	FvH4_1g03420.1	100	2e-106	318	fasciclin-like arabinogalactan protein 13 [Fragaria vesca subsp. vesca]
TRINITY_DN300851_c0_g1	TRINITY_DN300851_c0_g1_i1	FvH4_2g30720.1	100	2e-128	373	fasciclin-like arabinogalactan protein 14 [Fragaria vesca subsp. vesca]
TRINITY_DN75740_c0_g1	TRINITY_DN75740_c0_g1_i1	FvH4_2g30730.1	100	6e-123	361	fasciclin-like arabinogalactan protein 14 [Fragaria vesca subsp. vesca]
TRINITY_DN9170_c0_g1	TRINITY_DN9170_c0_g1_i4	FvH4_6g20860.1	100	0	706	fasciclin-like arabinogalactan protein 15 [Fragaria vesca subsp. vesca]
TRINITY_DN32557_c0_g1	TRINITY_DN32557_c0_g1_i3	FvH4_3g26750.1	100	0	747	fasciclin-like arabinogalactan protein 16 [Fragaria vesca subsp. vesca]
TRINITY_DN11036_c1_g1	TRINITY_DN11036_c1_g1_i1	FvH4_2g04910.1	100	3e-150	427	fasciclin-like arabinogalactan protein 19 [Fragaria vesca subsp. vesca]
TRINITY_DN5900_c0_g1	TRINITY_DN5900_c0_g1_i1	FvH4_6g40590.1	100	0	624	fasciclin-like arabinogalactan protein 2 [Fragaria vesca subsp. vesca]
TRINITY_DN172144_c0_g1	TRINITY_DN172144_c0_g1_i1	FvH4_6g43900.1	100	5e-90	269	fasciclin-like arabinogalactan protein 21 [Fragaria vesca subsp. vesca]
TRINITY_DN476_c0_g1	TRINITY_DN476_c0_g1_i1	FvH4_6g41530.1	100	6e-122	369	fasciclin-like arabinogalactan protein 7 [Fragaria vesca subsp. vesca]<>fasciclin-like arabinogalactan protein 7 [Fragaria vesca subsp. vesca]
TRINITY_DN7355_c0_g1	TRINITY_DN7355_c0_g1_i4	FvH4_3g10780.1	100	1e-167	491	fatty acid 2-hydroxylase 1-like [Fragaria vesca subsp. vesca]<>fatty acid 2-hydroxylase 1-like [Fragaria vesca subsp. vesca]
TRINITY_DN276735_c0_g1	TRINITY_DN276735_c0_g1_i1	FvH4_3g22400.1	100	1e-96	283	fatty acid desaturase 4, chloroplastic [Fragaria vesca subsp. vesca]
TRINITY_DN293005_c0_g1	TRINITY_DN293005_c0_g1_i1	FvH4_6g21540.1	100	0	1160	fatty acyl-CoA reductase 2 [Fragaria vesca subsp. vesca]<>fatty acyl-CoA reductase 2 [Fragaria vesca subsp. vesca]
TRINITY_DN1715_c1_g1	TRINITY_DN1715_c1_g1_i4	FvH4_3g24560.1	100	0	776	fatty acyl-CoA reductase 3-like [Fragaria vesca subsp. vesca]
TRINITY_DN9037_c0_g1	TRINITY_DN9037_c0_g1_i1	FvH4_2g23480.1	100	1e-142	409	fatty-acid-binding protein 1 [Fragaria vesca subsp. vesca]
TRINITY_DN77_c0_g1	TRINITY_DN77_c0_g1_i2	FvH4_3g17350.1	100	5e-58	200	fatty-acid-binding protein 3, chloroplastic isoform X2 [Olea europaea var. sylvestris]
TRINITY_DN18446_c0_g2	TRINITY_DN18446_c0_g2_i1	FvH4_6g48330.1	100	5e-153	447	FBD-associated F-box protein At4g13985-like [Rosa chinensis]<>FBD-associated F-box protein At4g13985-like [Rosa chinensis]<>putative F-box domain, FBD domain, leucine-rich repeat domain, L domain-containing protein [Rosa chinensis]
TRINITY_DN12006_c0_g1	TRINITY_DN12006_c0_g1_i2	FvH4_2g27090.1	100	4e-111	348	F-box protein 7 isoform X2 [Fragaria vesca subsp. vesca]
TRINITY_DN7439_c0_g1	TRINITY_DN7439_c0_g1_i2	FvH4_5g29550.1	100	0	835	F-box protein At1g10780 isoform X1 [Fragaria vesca subsp. vesca]
TRINITY_DN18020_c0_g1	TRINITY_DN18020_c0_g1_i2	FvH4_4g05570.1	100	3e-33	123	F-box protein At1g10780 isoform X1 [Rosa chinensis]<>putative F-box domain, leucine-rich repeat domain, L domain-containing protein [Rosa chinensis]
TRINITY_DN1650_c0_g4	TRINITY_DN1650_c0_g4_i1	FvH4_5g08330.1	100	0	649	F-box protein At1g67340 [Fragaria vesca subsp. vesca]
TRINITY_DN2521_c1_g2	TRINITY_DN2521_c1_g2_i2	FvH4_5g31300.1	100	0	863	F-box protein At2g23160-like isoform X1 [Fragaria vesca subsp. vesca]
TRINITY_DN13537_c0_g1	TRINITY_DN13537_c0_g1_i6	FvH4_4g29670.1	100	0	843	F-box protein At2g26160-like isoform X1 [Fragaria vesca subsp. vesca]<>F-box protein At2g26160-like isoform X1 [Fragaria vesca subsp. vesca]
TRINITY_DN10822_c0_g2	TRINITY_DN10822_c0_g2_i1	FvH4_2g23740.1	100	0	721	F-box protein At2g27310-like isoform X2 [Fragaria vesca subsp. vesca]
TRINITY_DN8450_c0_g1	TRINITY_DN8450_c0_g1_i1	FvH4_2g14090.1	100	0	716	F-box protein At2g32560-like [Fragaria vesca subsp. vesca]
TRINITY_DN12892_c0_g1	TRINITY_DN12892_c0_g1_i2	FvH4_6g14500.1	100	0	753	F-box protein At2g39490-like [Fragaria vesca subsp. vesca]
TRINITY_DN5148_c0_g3	TRINITY_DN5148_c0_g3_i2	FvH4_6g41480.1	100	0	864	F-box protein At3g07870 [Fragaria vesca subsp. vesca]
TRINITY_DN5210_c0_g3	TRINITY_DN5210_c0_g3_i1	FvH4_1g29150.1	100	0	746	F-box protein At3g07870-like [Fragaria vesca subsp. vesca]
TRINITY_DN6360_c0_g1	TRINITY_DN6360_c0_g1_i3	FvH4_2g07510.1	100	0	832	F-box protein At3g07870-like [Prunus dulcis]<>F-box [Prunus dulcis]
TRINITY_DN35602_c0_g2	TRINITY_DN35602_c0_g2_i1	FvH4_6g02420.1	100	0	754	F-box protein At3g07870-like [Prunus mume]
TRINITY_DN21386_c0_g1	TRINITY_DN21386_c0_g1_i1	FvH4_4g16640.1	100	0	810	F-box protein At3g07870-like isoform X1 [Fragaria vesca subsp. vesca]
TRINITY_DN265701_c0_g1	TRINITY_DN265701_c0_g1_i1	FvH4_5g06780.1	100	1e-107	319	F-box protein At4g19940-like [Fragaria vesca subsp. vesca]
TRINITY_DN3959_c0_g2	TRINITY_DN3959_c0_g2_i1	FvH4_1g04460.1	100	7e-72	224	F-box protein At4g22390-like [Fragaria vesca subsp. vesca]<>F-box protein At4g22390-like [Fragaria vesca subsp. vesca]
TRINITY_DN10318_c0_g1	TRINITY_DN10318_c0_g1_i1	FvH4_1g11320.1	100	2e-83	181	F-box protein At4g35930 [Fragaria vesca subsp. vesca]
TRINITY_DN8504_c0_g1	TRINITY_DN8504_c0_g1_i1	FvH4_6g21050.1	100	0	964	F-box protein At5g06550 [Fragaria vesca subsp. vesca]
TRINITY_DN26884_c1_g1	TRINITY_DN26884_c1_g1_i1	FvH4_4g06330.1	100	0	815	F-box protein At5g07610-like [Fragaria vesca subsp. vesca]
TRINITY_DN3406_c0_g1	TRINITY_DN3406_c0_g1_i1	FvH4_4g06960.1	100	0	792	F-box protein At5g07610-like [Fragaria vesca subsp. vesca]
TRINITY_DN3406_c0_g4	TRINITY_DN3406_c0_g4_i1	FvH4_4g15770.1	100	1e-137	404	F-box protein At5g07610-like [Fragaria vesca subsp. vesca]
TRINITY_DN62841_c0_g1	TRINITY_DN62841_c0_g1_i1	FvH4_1g12890.1	100	2e-144	413	F-box protein At5g07610-like [Fragaria vesca subsp. vesca]
TRINITY_DN8200_c0_g1	TRINITY_DN8200_c0_g1_i4	FvH4_1g13490.1	100	0	693	F-box protein At5g07610-like [Fragaria vesca subsp. vesca]
TRINITY_DN8333_c3_g1	TRINITY_DN8333_c3_g1_i2	FvH4_2g35950.1	100	6e-114	330	F-box protein At5g07610-like [Fragaria vesca subsp. vesca]
TRINITY_DN7234_c0_g3	TRINITY_DN7234_c0_g3_i1	FvH4_4g01430.1	100	0	569	F-box protein At5g07610-like [Rosa chinensis]<>putative F-box domain-containing protein [Rosa chinensis]
TRINITY_DN6452_c0_g1	TRINITY_DN6452_c0_g1_i4	FvH4_6g47020.1	100	0	515	F-box protein At5g39250 [Fragaria vesca subsp. vesca]
TRINITY_DN8116_c0_g1	TRINITY_DN8116_c0_g1_i2	FvH4_1g24840.1	100	0	1144	F-box protein At5g39450 [Fragaria vesca subsp. vesca]
TRINITY_DN2170_c0_g2	TRINITY_DN2170_c0_g2_i1	FvH4_3g05230.1	100	0	695	F-box protein At5g46170 [Fragaria vesca subsp. vesca]
TRINITY_DN8402_c0_g1	TRINITY_DN8402_c0_g1_i3	FvH4_4g20690.1	100	0	751	F-box protein At5g49610 [Fragaria vesca subsp. vesca]
TRINITY_DN7160_c0_g2	TRINITY_DN7160_c0_g2_i5	FvH4_6g38070.1	100	6e-43	149	F-box protein At5g49610-like
TRINITY_DN10193_c0_g1	TRINITY_DN10193_c0_g1_i7	FvH4_6g30250.1	100	0	771	F-box protein At5g49610-like [Fragaria vesca subsp. vesca]
TRINITY_DN21784_c0_g1	TRINITY_DN21784_c0_g1_i3	FvH4_6g10670.1	100	3e-45	152	F-box protein CPR1-like [Rosa chinensis]<>F-box protein CPR1-like [Rosa chinensis]<>F-box protein CPR1-like [Rosa chinensis]<>F-box protein CPR1-like [Rosa chinensis]<>putative F-box domain-containing protein [Rosa chinensis]
TRINITY_DN52858_c0_g1	TRINITY_DN52858_c0_g1_i1	FvH4_6g10660.1	100	1e-47	154	F-box protein CPR1-like [Rosa chinensis]<>F-box protein CPR1-like [Rosa chinensis]<>F-box protein CPR1-like [Rosa chinensis]<>F-box protein CPR1-like [Rosa chinensis]<>putative F-box domain-containing protein [Rosa chinensis]
TRINITY_DN14427_c0_g1	TRINITY_DN14427_c0_g1_i2	FvH4_3g00900.1	100	0	796	F-box protein CPR30 [Fragaria vesca subsp. vesca]
TRINITY_DN91200_c0_g1	TRINITY_DN91200_c0_g1_i1	FvH4_5g16160.1	100	0	1278	F-box protein CPR30-like
TRINITY_DN1372_c0_g3	TRINITY_DN1372_c0_g3_i1	FvH4_3g29730.1	100	4e-39	139	F-box protein CPR30-like [Fragaria vesca subsp. vesca]
TRINITY_DN169727_c0_g1	TRINITY_DN169727_c0_g1_i1	FvH4_3g24880.1	100	0	869	F-box protein CPR30-like [Fragaria vesca subsp. vesca]
TRINITY_DN23230_c1_g1	TRINITY_DN23230_c1_g1_i1	FvH4_1g13750.1	100	7e-160	459	F-box protein CPR30-like [Fragaria vesca subsp. vesca]
TRINITY_DN4624_c0_g2	TRINITY_DN4624_c0_g2_i8	FvH4_1g18880.1	100	0	408	F-box protein CPR30-like [Fragaria vesca subsp. vesca]
TRINITY_DN794_c1_g2	TRINITY_DN794_c1_g2_i1	FvH4_1g13760.1	100	3e-129	378	F-box protein CPR30-like [Fragaria vesca subsp. vesca]
TRINITY_DN839_c0_g1	TRINITY_DN839_c0_g1_i1	FvH4_2g02020.1	100	0	822	F-box protein CPR30-like [Fragaria vesca subsp. vesca]
TRINITY_DN8983_c0_g1	TRINITY_DN8983_c0_g1_i2	FvH4_7g26000.1	100	0	993	F-box protein CPR30-like [Fragaria vesca subsp. vesca]
TRINITY_DN4306_c0_g12	TRINITY_DN4306_c0_g1_i12	FvH4_2g26290.1	100	0	855	F-box protein CPR30-like [Fragaria vesca subsp. vesca]
TRINITY_DN5221_c0_g1	TRINITY_DN5221_c0_g1_i3	FvH4_3g16850.1	100	0	796	F-box protein CPR30-like [Fragaria vesca subsp. vesca]<>F-box protein CPR30-like [Fragaria vesca subsp. vesca]<>F-box protein CPR30-like [Fragaria vesca subsp. vesca]<>F-box protein CPR30-like [Fragaria vesca subsp. vesca]
TRINITY_DN54341_c0_g2	TRINITY_DN54341_c0_g2_i1	FvH4_7g25790.1	100	0	536	F-box protein CPR30-like isoform X1 [Fragaria vesca subsp. vesca]
TRINITY_DN9496_c0_g2	TRINITY_DN9496_c0_g2_i2	FvH4_3g18890.1	100	0	578	F-box protein CPR30-like isoform X3 [Fragaria vesca subsp. vesca]
TRINITY_DN1610_c0_g2	TRINITY_DN1610_c0_g2_i3	FvH4_5g36830.1	100	2e-131	406	F-box protein FBW2-like [Fragaria vesca subsp. vesca]
TRINITY_DN1610_c0_g1	TRINITY_DN1610_c0_g1_i2	FvH4_5g36840.1	100	1e-126	382	F-box protein FBW2-like [Fragaria vesca subsp. vesca]<>F-box protein FBW2-like [Fragaria vesca subsp. vesca]
TRINITY_DN1387_c0_g3	TRINITY_DN1387_c0_g3_i1	FvH4_2g33690.1	100	7e-84	263	F-box protein GID2 [Fragaria vesca subsp. vesca]
TRINITY_DN4041_c0_g1	TRINITY_DN4041_c0_g1_i2	FvH4_5g01540.1	100	5e-93	299	F-box protein PP2-A12-like [Fragaria vesca subsp. vesca]
TRINITY_DN10093_c0_g1	TRINITY_DN10093_c0_g1_i2	FvH4_6g17460.1	100	2e-107	328	F-box protein PP2-A15 [Fragaria vesca subsp. vesca]
TRINITY_DN5005_c1_g1	TRINITY_DN5005_c1_g1_i4	FvH4_4g24590.1	100	0	1095	F-box protein SKIP14 [Fragaria vesca subsp. vesca]
TRINITY_DN1109_c2_g1	TRINITY_DN1109_c2_g1_i3	FvH4_6g52710.1	100	0	906	F-box protein SKIP14-like isoform X1 [Fragaria vesca subsp. vesca]<>F-box protein SKIP14-like isoform X1 [Fragaria vesca subsp. vesca]<>F-box protein SKIP14-like isoform X1 [Fragaria vesca subsp. vesca]
TRINITY_DN11901_c0_g1	TRINITY_DN11901_c0_g1_i1	FvH4_2g23360.1	100	0	1018	F-box protein SKIP17-like [Fragaria vesca subsp. vesca]
TRINITY_DN2148_c1_g1	TRINITY_DN2148_c1_g1_i1	FvH4_3g09530.1	100	5e-148	436	F-box protein SKIP19 [Fragaria vesca subsp. vesca]
TRINITY_DN5773_c0_g1	TRINITY_DN5773_c0_g1_i1	FvH4_1g16660.1	100	0	1016	F-box protein SKIP2 [Fragaria vesca subsp. vesca]
TRINITY_DN11630_c0_g1	TRINITY_DN11630_c0_g1_i1	FvH4_2g03310.1	100	0	820	F-box protein SKIP22-like [Fragaria vesca subsp. vesca]
TRINITY_DN5418_c0_g1	TRINITY_DN5418_c0_g1_i3	FvH4_5g04920.1	100	4e-52	186	F-box protein SKIP8-like [Fragaria vesca subsp. vesca]
TRINITY_DN206_c0_g1	TRINITY_DN206_c0_g1_i9	FvH4_2g15180.1	100	3e-149	306	F-box protein SKP2B [Fragaria vesca subsp. vesca]<>F-box protein SKP2B [Fragaria vesca subsp. vesca]
TRINITY_DN15655_c2_g1	TRINITY_DN15655_c2_g1_i1	FvH4_2g32600.1	100	1e-42	145	F-box protein SKP2B-like [Fragaria vesca subsp. vesca]
TRINITY_DN2173_c0_g3	TRINITY_DN2173_c0_g3_i1	FvH4_2g32610.1	100	2e-116	336	F-box protein SKP2B-like [Fragaria vesca subsp. vesca]
TRINITY_DN2173_c0_g4	TRINITY_DN2173_c0_g4_i1	FvH4_2g32590.1	100	0	662	F-box protein SKP2B-like [Fragaria vesca subsp. vesca]
TRINITY_DN156149_c0_g1	TRINITY_DN156149_c0_g1_i1	FvH4_4g16010.1	100	9e-97	287	F-box/FBD/LRR-repeat protein At1g13570 isoform X2
TRINITY_DN43050_c0_g2	TRINITY_DN43050_c0_g2_i1	FvH4_5g01320.1	100	6e-169	480	F-box/FBD/LRR-repeat protein At1g13570-like [Fragaria vesca subsp. vesca]<>F-box/FBD/LRR-repeat protein At1g13570-like [Fragaria vesca subsp. vesca]<>F-box/FBD/LRR-repeat protein At1g13570-like [Fragaria vesca subsp. vesca]
TRINITY_DN299237_c0_g1	TRINITY_DN299237_c0_g1_i1	FvH4_5g09550.1	100	1e-52	169	F-box/FBD/LRR-repeat protein At1g13570-like isoform X1 [Fragaria vesca subsp. vesca]
TRINITY_DN9093_c0_g1	TRINITY_DN9093_c0_g1_i1	FvH4_1g06320.1	100	7e-165	476	F-box/FBD/LRR-repeat protein At3g26920-like [Fragaria vesca subsp. vesca]
TRINITY_DN7099_c3_g1	TRINITY_DN7099_c3_g1_i1	FvH4_3g17190.1	100	0	917	F-box/FBD/LRR-repeat protein At4g26340-like [Fragaria vesca subsp. vesca]
TRINITY_DN13627_c0_g1	TRINITY_DN13627_c0_g1_i1	FvH4_6g30930.1	100	0	719	F-box/kelch-repeat protein At1g15670-like [Fragaria vesca subsp. vesca]
TRINITY_DN172888_c0_g1	TRINITY_DN172888_c0_g1_i1	FvH4_4g32970.1	100	0	772	F-box/kelch-repeat protein At1g23390 [Fragaria vesca subsp. vesca]
TRINITY_DN981_c0_g1	TRINITY_DN981_c0_g1_i1	FvH4_6g18890.1	100	0	735	F-box/kelch-repeat protein At1g57790-like [Fragaria vesca subsp. vesca]
TRINITY_DN1124_c0_g4	TRINITY_DN1124_c0_g4_i1	FvH4_3g42360.1	100	0	826	F-box/kelch-repeat protein At3g06240-like [Fragaria vesca subsp. vesca]
TRINITY_DN1212_c0_g3	TRINITY_DN1212_c0_g3_i2	FvH4_3g39990.1	100	0	699	F-box/kelch-repeat protein At3g06240-like [Fragaria vesca subsp. vesca]
TRINITY_DN1865_c0_g4	TRINITY_DN1865_c0_g4_i1	FvH4_6g33740.1	100	0	756	F-box/kelch-repeat protein At3g06240-like [Fragaria vesca subsp. vesca]
TRINITY_DN291051_c0_g1	TRINITY_DN291051_c0_g1_i1	FvH4_3g42490.1	100	9e-131	376	F-box/kelch-repeat protein At3g06240-like [Fragaria vesca subsp. vesca]
TRINITY_DN7370_c0_g1	TRINITY_DN7370_c0_g1_i1	FvH4_1g17570.1	100	0	775	F-box/kelch-repeat protein At3g06240-like [Fragaria vesca subsp. vesca]
TRINITY_DN12020_c0_g2	TRINITY_DN12020_c0_g2_i2	FvH4_2g08290.1	100	0	806	F-box/kelch-repeat protein At3g06240-like [Fragaria vesca subsp. vesca]<>F-box/kelch-repeat protein At3g06240-like [Fragaria vesca subsp. vesca]
TRINITY_DN25448_c0_g3	TRINITY_DN25448_c0_g3_i1	FvH4_6g28330.1	100	0	755	F-box/kelch-repeat protein At3g06240-like [Fragaria vesca subsp. vesca]<>F-box/kelch-repeat protein At3g06240-like [Fragaria vesca subsp. vesca]
TRINITY_DN462_c0_g1	TRINITY_DN462_c0_g1_i1	FvH4_3g15810.1	100	0	715	F-box/kelch-repeat protein At3g06240-like [Fragaria vesca subsp. vesca]<>F-box/kelch-repeat protein At3g06240-like [Fragaria vesca subsp. vesca]
TRINITY_DN1212_c0_g2	TRINITY_DN1212_c0_g2_i1	FvH4_3g39980.1	100	0	750	F-box/kelch-repeat protein At3g06240-like [Fragaria vesca subsp. vesca]<>F-box/kelch-repeat protein At3g06240-like [Fragaria vesca subsp. vesca]<>F-box/kelch-repeat protein At3g06240-like [Fragaria vesca subsp. vesca]
TRINITY_DN1124_c0_g1	TRINITY_DN1124_c0_g1_i3	FvH4_3g42450.1	100	0	720	F-box/kelch-repeat protein At3g06240-like isoform X1 [Fragaria vesca subsp. vesca]
TRINITY_DN4029_c0_g1	TRINITY_DN4029_c0_g1_i1	FvH4_5g33140.1	100	0	695	F-box/kelch-repeat protein At3g06240-like isoform X1 [Fragaria vesca subsp. vesca]
TRINITY_DN276119_c0_g1	TRINITY_DN276119_c0_g1_i1	FvH4_6g15000.1	100	1e-50	157	F-box/kelch-repeat protein At3g06240-like isoform X2 [Fragaria vesca subsp. vesca]
TRINITY_DN223288_c0_g1	TRINITY_DN223288_c0_g1_i1	FvH4_7g08620.1	100	6e-55	178	F-box/kelch-repeat protein At3g18720-like [Rosa chinensis]
TRINITY_DN13517_c0_g2	TRINITY_DN13517_c0_g2_i2	FvH4_2g40320.1	100	2e-81	253	F-box/kelch-repeat protein At3g23880-like [Fragaria vesca subsp. vesca]
TRINITY_DN15182_c0_g1	TRINITY_DN15182_c0_g1_i1	FvH4_1g00300.1	100	0	811	F-box/kelch-repeat protein At3g23880-like [Fragaria vesca subsp. vesca]
TRINITY_DN39429_c0_g1	TRINITY_DN39429_c0_g1_i2	FvH4_3g32340.1	100	2e-99	292	F-box/kelch-repeat protein At3g23880-like [Fragaria vesca subsp. vesca]
TRINITY_DN6598_c0_g2	TRINITY_DN6598_c0_g2_i1	FvH4_1g19570.1	100	0	721	F-box/kelch-repeat protein At3g23880-like [Fragaria vesca subsp. vesca]
TRINITY_DN18392_c0_g1	TRINITY_DN18392_c0_g1_i3	FvH4_3g18910.1	100	0	800	F-box/kelch-repeat protein At3g23880-like [Fragaria vesca subsp. vesca]<>F-box/kelch-repeat protein At3g23880-like [Fragaria vesca subsp. vesca]
TRINITY_DN11_c0_g3	TRINITY_DN11_c0_g3_i3	FvH4_2g19330.1	100	0	715	F-box/kelch-repeat protein At3g24760 [Fragaria vesca subsp. vesca]<>F-box/kelch-repeat protein At3g24760 [Fragaria vesca subsp. vesca]<>F-box/kelch-repeat protein At3g24760 [Fragaria vesca subsp. vesca]<>F-box/kelch-repeat protein At3g24760 [Fragaria vesca subsp. vesca]
TRINITY_DN4305_c1_g1	TRINITY_DN4305_c1_g1_i1	FvH4_7g15730.1	100	0	842	F-box/kelch-repeat protein At3g61590 [Fragaria vesca subsp. vesca]<>F-box/kelch-repeat protein At3g61590 [Fragaria vesca subsp. vesca]
TRINITY_DN6986_c0_g1	TRINITY_DN6986_c0_g1_i1	FvH4_6g46160.1	100	0	878	F-box/kelch-repeat protein At5g15710 [Fragaria vesca subsp. vesca]
TRINITY_DN2209_c0_g1	TRINITY_DN2209_c0_g1_i4	FvH4_5g25640.1	100	0	1138	F-box/kelch-repeat protein At5g42350-like isoform X1 [Fragaria vesca subsp. vesca]<>F-box/kelch-repeat protein At5g42350-like isoform X1 [Fragaria vesca subsp. vesca]
TRINITY_DN16906_c0_g1	TRINITY_DN16906_c0_g1_i1	FvH4_2g33130.1	100	0	632	F-box/kelch-repeat protein At5g43190 [Fragaria vesca subsp. vesca]
TRINITY_DN22608_c0_g1	TRINITY_DN22608_c0_g1_i1	FvH4_5g24190.1	100	0	639	F-box/kelch-repeat protein SKIP25 [Fragaria vesca subsp. vesca]
TRINITY_DN3173_c0_g1	TRINITY_DN3173_c0_g1_i1	FvH4_2g15790.1	100	0	928	F-box/LRR-repeat protein 10 [Fragaria vesca subsp. vesca]
TRINITY_DN1851_c0_g10	TRINITY_DN1851_c0_g1_i10	FvH4_6g29180.1	100	0	641	F-box/LRR-repeat protein 13 [Fragaria vesca subsp. vesca]
TRINITY_DN6366_c0_g3	TRINITY_DN6366_c0_g3_i2	FvH4_7g30140.1	100	3e-96	294	F-box/LRR-repeat protein 20-like
TRINITY_DN2173_c2_g3	TRINITY_DN2173_c2_g3_i1	FvH4_4g11400.1	100	2e-23	95.5	F-box/LRR-repeat protein 20-like [Fragaria vesca subsp. vesca]
TRINITY_DN323266_c0_g1	TRINITY_DN323266_c0_g1_i1	FvH4_2g34990.1	100	0	678	F-box/LRR-repeat protein 20-like [Fragaria vesca subsp. vesca]
TRINITY_DN953_c0_g1	TRINITY_DN953_c0_g1_i1	FvH4_3g40700.1	100	0	669	F-box/LRR-repeat protein 20-like [Fragaria vesca subsp. vesca]
TRINITY_DN2762_c0_g2	TRINITY_DN2762_c0_g2_i1	FvH4_3g21760.1	100	0	854	F-box/LRR-repeat protein 20-like [Fragaria vesca subsp. vesca]<>F-box/LRR-repeat protein 20-like [Fragaria vesca subsp. vesca]<>F-box/LRR-repeat protein 20-like [Fragaria vesca subsp. vesca]
TRINITY_DN11922_c0_g1	TRINITY_DN11922_c0_g1_i1	FvH4_2g32520.1	100	0	551	F-box/LRR-repeat protein 2-like [Fragaria vesca subsp. vesca]
TRINITY_DN16612_c0_g1	TRINITY_DN16612_c0_g1_i1	FvH4_2g35530.1	100	1e-152	434	F-box/LRR-repeat protein 2-like [Fragaria vesca subsp. vesca]
TRINITY_DN9430_c0_g1	TRINITY_DN9430_c0_g1_i1	FvH4_2g35000.1	100	0	721	F-box/LRR-repeat protein 2-like [Fragaria vesca subsp. vesca]
TRINITY_DN2636_c1_g1	TRINITY_DN2636_c1_g1_i7	FvH4_4g37160.1	100	0	736	F-box/LRR-repeat protein 4 [Fragaria vesca subsp. vesca]
TRINITY_DN327_c0_g3	TRINITY_DN327_c0_g3_i3	FvH4_6g51200.1	100	0	793	F-box/LRR-repeat protein 4 [Fragaria vesca subsp. vesca]
TRINITY_DN1728_c2_g4	TRINITY_DN1728_c2_g4_i1	FvH4_6g10180.1	100	2e-85	259	F-box/LRR-repeat protein 4-like [Fragaria vesca subsp. vesca]
TRINITY_DN7142_c0_g1	TRINITY_DN7142_c0_g1_i1	FvH4_6g18580.1	100	0	817	F-box/LRR-repeat protein At1g67190 [Fragaria vesca subsp. vesca]
TRINITY_DN5354_c0_g1	TRINITY_DN5354_c0_g1_i4	FvH4_5g30670.1	100	0	865	F-box/LRR-repeat protein At2g43260-like [Fragaria vesca subsp. vesca]
TRINITY_DN566_c1_g1	TRINITY_DN566_c1_g1_i1	FvH4_6g44000.1	100	0	686	F-box/LRR-repeat protein At3g26922-like [Fragaria vesca subsp. vesca]
TRINITY_DN7479_c0_g1	TRINITY_DN7479_c0_g1_i1	FvH4_4g13890.1	100	0	559	F-box/LRR-repeat protein At3g48880-like [Fragaria vesca subsp. vesca]<>F-box/LRR-repeat protein At3g48880-like [Fragaria vesca subsp. vesca]
TRINITY_DN33908_c0_g1	TRINITY_DN33908_c0_g1_i1	FvH4_7g29330.1	100	9e-15	67.8	F-box/LRR-repeat protein At3g48880-like [Rosa chinensis]<>putative F-box domain, leucine-rich repeat domain, L domain-containing protein [Rosa chinensis]
TRINITY_DN474_c0_g1	TRINITY_DN474_c0_g1_i4	FvH4_3g12570.1	100	2e-60	199	F-box/LRR-repeat protein At3g48880-like \\ 0.00E+00 \\ 63.82 %
TRINITY_DN1669_c0_g2	TRINITY_DN1669_c0_g2_i1	FvH4_3g02890.1	100	8e-172	491	F-box/LRR-repeat protein At3g58980-like [Fragaria vesca subsp. vesca]<>F-box/LRR-repeat protein At3g58980-like [Fragaria vesca subsp. vesca]
TRINITY_DN2026_c7_g1	TRINITY_DN2026_c7_g1_i1	FvH4_3g33400.1	100	0	843	F-box/LRR-repeat protein At3g59200-like [Fragaria vesca subsp. vesca]
TRINITY_DN20375_c0_g1	TRINITY_DN20375_c0_g1_i1	FvH4_6g19090.1	100	2e-170	486	F-box/LRR-repeat protein At4g14103-like [Fragaria vesca subsp. vesca]
TRINITY_DN20375_c1_g1	TRINITY_DN20375_c1_g1_i1	FvH4_6g33940.1	100	5e-65	196	F-box/LRR-repeat protein At4g14103-like [Fragaria vesca subsp. vesca]
TRINITY_DN6165_c0_g1	TRINITY_DN6165_c0_g1_i6	FvH4_3g20090.1	100	1e-153	460	F-box/LRR-repeat protein At4g14103-like [Rosa chinensis]
TRINITY_DN7883_c0_g1	TRINITY_DN7883_c0_g1_i2	FvH4_3g27150.1	100	0	1148	F-box/WD-40 repeat-containing protein At5g21040 [Fragaria vesca subsp. vesca]<>F-box/WD-40 repeat-containing protein At5g21040 [Fragaria vesca subsp. vesca]
TRINITY_DN7655_c0_g1	TRINITY_DN7655_c0_g1_i3	FvH4_1g16940.1	100	0	1045	F-box-like/WD repeat-containing protein TBL1XR1 [Fragaria vesca subsp. vesca]
TRINITY_DN17785_c0_g1	TRINITY_DN17785_c0_g1_i2	FvH4_3g12020.1	100	0	581	fe(2+) transport protein 1-like \\ 3.30E-04 \\ 76.92 %
TRINITY_DN24222_c0_g1	TRINITY_DN24222_c0_g1_i1	FvH4_5g21760.1	100	6e-139	397	ferredoxin [Fragaria vesca subsp. vesca]
TRINITY_DN696_c2_g1	TRINITY_DN696_c2_g1_i1	FvH4_4g15630.1	100	7e-108	313	ferredoxin, root R-B2 [Fragaria vesca subsp. vesca]
TRINITY_DN16815_c0_g1	TRINITY_DN16815_c0_g1_i1	FvH4_5g28820.1	100	1e-72	222	ferredoxin-1-like [Fragaria vesca subsp. vesca]
TRINITY_DN6183_c0_g1	TRINITY_DN6183_c0_g1_i2	FvH4_1g11730.1	100	0	736	ferredoxin--NADP reductase, leaf isozyme, chloroplastic [Fragaria vesca subsp. vesca]
TRINITY_DN6910_c0_g1	TRINITY_DN6910_c0_g1_i1	FvH4_2g05960.1	100	2e-161	492	ferredoxin--nitrite reductase, chloroplastic [Fragaria vesca subsp. vesca]
TRINITY_DN70694_c0_g1	TRINITY_DN70694_c0_g1_i1	FvH4_6g50060.1	100	2e-144	412	ferredoxin-thioredoxin reductase catalytic chain, chloroplastic [Fragaria vesca subsp. vesca]
TRINITY_DN10961_c0_g1	TRINITY_DN10961_c0_g1_i1	FvH4_5g27150.1	100	0	1430	ferric reduction oxidase 7, chloroplastic [Fragaria vesca subsp. vesca]
TRINITY_DN1195_c0_g1	TRINITY_DN1195_c0_g1_i1	FvH4_6g10770.1	100	2e-135	391	ferritin-3, chloroplastic [Fragaria vesca subsp. vesca]
TRINITY_DN4706_c0_g1	TRINITY_DN4706_c0_g1_i4	FvH4_6g00970.1	100	5e-177	525	ferrochelatase-2, chloroplastic [Fragaria vesca subsp. vesca]
TRINITY_DN344828_c0_g1	TRINITY_DN344828_c0_g1_i1	FvH4_6g31590.1	100	6e-51	166	FH protein interacting protein FIP2-like [Fragaria vesca subsp. vesca]
TRINITY_DN13597_c0_g1	TRINITY_DN13597_c0_g1_i1	FvH4_6g53320.1	100	0	1231	fidgetin-like protein 1 [Fragaria vesca subsp. vesca]
TRINITY_DN491_c0_g1	TRINITY_DN491_c0_g1_i6	FvH4_1g25530.1	100	0	792	filament-like plant protein [Fragaria vesca subsp. vesca]<>filament-like plant protein [Fragaria vesca subsp. vesca]<>filament-like plant protein [Fragaria vesca subsp. vesca]<>filament-like plant protein [Fragaria vesca subsp. vesca]
TRINITY_DN6570_c0_g1	TRINITY_DN6570_c0_g1_i2	FvH4_3g23730.1	100	0	1422	fimbrin-1-like [Fragaria vesca subsp. vesca]
TRINITY_DN2170_c0_g1	TRINITY_DN2170_c0_g1_i4	FvH4_1g01180.1	100	0	2204	FIP1[V]-like protein [Fragaria vesca subsp. vesca]
TRINITY_DN3166_c1_g1	TRINITY_DN3166_c1_g1_i1	FvH4_5g05840.1	100	6e-167	488	FKBP12-interacting protein of 37 kDa [Fragaria vesca subsp. vesca]
TRINITY_DN4197_c1_g1	TRINITY_DN4197_c1_g1_i1	FvH4_7g12990.1	100	0	1224	flap endonuclease GEN-like 1 [Fragaria vesca subsp. vesca]
TRINITY_DN19054_c0_g1	TRINITY_DN19054_c0_g1_i1	FvH4_1g11810.1	100	8e-94	305	flavanone 3-hydroxylase [Fragaria x ananassa]
TRINITY_DN4281_c0_g1	TRINITY_DN4281_c0_g1_i2	FvH4_5g35170.1	100	6e-171	482	flavonoid 3',5'-methyltransferase-like [Fragaria vesca subsp. vesca]
TRINITY_DN4_c0_g2	TRINITY_DN4_c0_g2_i1	FvH4_1g08780.1	100	0	956	flavonoid 3'-monooxygenase-like [Fragaria vesca subsp. vesca]
TRINITY_DN20504_c0_g1	TRINITY_DN20504_c0_g1_i1	FvH4_3g13000.1	100	0	914	flavonoid 3-O-glucosyltransferase-like
TRINITY_DN9584_c0_g13	TRINITY_DN9584_c0_g1_i13	FvH4_3g36910.1	100	0	1024	flocculation protein FLO11 [Fragaria vesca subsp. vesca]<>flocculation protein FLO11 [Fragaria vesca subsp. vesca]
TRINITY_DN27422_c0_g2	TRINITY_DN27422_c0_g2_i5	FvH4_3g06720.1	100	2e-96	285	floral homeotic protein AGAMOUS isoform X3 [Fragaria vesca subsp. vesca]
TRINITY_DN34264_c0_g1	TRINITY_DN34264_c0_g1_i2	FvH4_1g12260.1	100	5e-156	443	floral homeotic protein DEFICIENS-like [Fragaria vesca subsp. vesca]
TRINITY_DN324379_c0_g1	TRINITY_DN324379_c0_g1_i1	FvH4_6g10190.1	100	0	832	flotillin-like protein 4 [Fragaria vesca subsp. vesca]
TRINITY_DN157310_c0_g1	TRINITY_DN157310_c0_g1_i1	FvH4_6g00090.1	100	3e-120	344	flowering locus T1 [Fragaria x ananassa]<>flowering locus T [Fragaria x ananassa]<>FLOWERING LOCUS T-like1 [Fragaria x ananassa]
TRINITY_DN4426_c1_g1	TRINITY_DN4426_c1_g1_i1	FvH4_2g30770.1	100	5e-71	216	flowering-promoting factor 1-like [Fragaria vesca subsp. vesca]
TRINITY_DN13726_c0_g1	TRINITY_DN13726_c0_g1_i1	FvH4_4g17910.1	100	6e-74	223	flowering-promoting factor 1-like protein 3 [Fragaria vesca subsp. vesca]
TRINITY_DN17902_c0_g1	TRINITY_DN17902_c0_g1_i3	FvH4_4g16240.1	100	0	976	folate-biopterin transporter 1, chloroplastic [Fragaria vesca subsp. vesca]
TRINITY_DN33814_c0_g1	TRINITY_DN33814_c0_g1_i3	FvH4_6g06480.1	100	0	766	formin-like protein 11 [Fragaria vesca subsp. vesca]
TRINITY_DN2879_c0_g2	TRINITY_DN2879_c0_g2_i4	FvH4_5g24110.1	100	0	1097	formin-like protein 14 isoform X1 [Fragaria vesca subsp. vesca]<>formin-like protein 14 isoform X1 [Fragaria vesca subsp. vesca]
TRINITY_DN24354_c0_g1	TRINITY_DN24354_c0_g1_i2	FvH4_2g38130.1	100	0	905	formin-like protein 16 isoform X1 [Fragaria vesca subsp. vesca]
TRINITY_DN153_c1_g1	TRINITY_DN153_c1_g1_i1	FvH4_5g15820.1	100	2e-100	326	formin-like protein 3 [Fragaria vesca subsp. vesca]
TRINITY_DN2493_c1_g11	TRINITY_DN2493_c1_g1_i11	FvH4_4g35240.1	100	0	1138	formin-like protein 8 [Fragaria vesca subsp. vesca]<>formin-like protein 8 [Fragaria vesca subsp. vesca]
TRINITY_DN10455_c0_g1	TRINITY_DN10455_c0_g1_i2	FvH4_6g20830.1	100	1e-137	399	Fra a 1 associated protein
TRINITY_DN635_c0_g1	TRINITY_DN635_c0_g1_i3	FvH4_1g05070.1	100	0	913	FRIGIDA-like protein 4a isoform X1 [Fragaria vesca subsp. vesca]
TRINITY_DN12358_c0_g1	TRINITY_DN12358_c0_g1_i2	FvH4_6g04560.1	100	2e-67	206	FRIGIDA-like protein 5
TRINITY_DN13093_c0_g1	TRINITY_DN13093_c0_g1_i1	FvH4_6g04380.1	100	0	1661	FRIGIDA-like protein 5 [Fragaria vesca subsp. vesca]
TRINITY_DN6233_c0_g1	TRINITY_DN6233_c0_g1_i6	FvH4_6g17970.1	100	0	557	fructose-bisphosphate aldolase cytoplasmic isozyme [Fragaria vesca subsp. vesca]
TRINITY_DN3333_c0_g1	TRINITY_DN3333_c0_g1_i2	FvH4_3g01030.1	100	0	613	fumarylacetoacetase [Rosa chinensis]<>putative fumarylacetoacetase [Rosa chinensis]
TRINITY_DN13_c2_g1	TRINITY_DN13_c2_g1_i3	FvH4_5g39470.1	100	0	1158	Fungal lipase-like domain containing protein
TRINITY_DN3155_c4_g1	TRINITY_DN3155_c4_g1_i2	FvH4_1g10520.1	100	0	848	G2/mitotic-specific cyclin-2 [Fragaria vesca subsp. vesca]
TRINITY_DN4038_c0_g1	TRINITY_DN4038_c0_g1_i3	FvH4_3g30140.1	100	0	893	GABA transporter 1 [Fragaria vesca subsp. vesca]
TRINITY_DN122084_c0_g1	TRINITY_DN122084_c0_g1_i5	FvH4_5g26560.1	100	0	650	galactan beta-1,4-galactosyltransferase GALS1 [Rosa chinensis]<>putative Glycosyltransferase family 92 [Rosa chinensis]
TRINITY_DN22169_c0_g1	TRINITY_DN22169_c0_g1_i1	FvH4_4g34160.1	100	0	690	galactinol synthase 1 [Fragaria vesca subsp. vesca]
TRINITY_DN22169_c0_g3	TRINITY_DN22169_c0_g3_i2	FvH4_6g07930.1	100	0	682	galactinol synthase 2-like [Fragaria vesca subsp. vesca]
TRINITY_DN20561_c0_g1	TRINITY_DN20561_c0_g1_i1	FvH4_4g20200.1	100	0	1037	galactokinase [Fragaria vesca subsp. vesca]
TRINITY_DN8277_c1_g1	TRINITY_DN8277_c1_g1_i1	FvH4_3g15850.1	100	0	909	galactomannan galactosyltransferase 1-like [Fragaria vesca subsp. vesca]
TRINITY_DN168677_c0_g1	TRINITY_DN168677_c0_g1_i1	FvH4_6g12780.1	100	0	1040	galactose oxidase [Fragaria vesca subsp. vesca]
TRINITY_DN23718_c0_g1	TRINITY_DN23718_c0_g1_i1	FvH4_2g08320.1	100	0	1105	galactose oxidase-like [Fragaria vesca subsp. vesca]
TRINITY_DN6340_c0_g15	TRINITY_DN6340_c0_g1_i15	FvH4_4g06430.1	100	4e-104	343	galacturonokinase [Fragaria vesca subsp. vesca]
TRINITY_DN7064_c0_g1	TRINITY_DN7064_c0_g1_i1	FvH4_1g12950.1	100	0	559	gamma carbonic anhydrase 1, mitochondrial [Fragaria vesca subsp. vesca]
TRINITY_DN8028_c0_g3	TRINITY_DN8028_c0_g3_i3	FvH4_2g39590.1	100	1e-160	476	gamma carbonic anhydrase 1, mitochondrial [Fragaria vesca subsp. vesca]
TRINITY_DN328891_c0_g1	TRINITY_DN328891_c0_g1_i1	FvH4_7g12720.1	100	0	514	gamma-glutamyl peptidase 5-like \\ 3.20E-41 \\ 77.81 %
TRINITY_DN1697_c1_g1	TRINITY_DN1697_c1_g1_i2	FvH4_3g39450.1	100	4e-62	211	gamma-interferon-inducible lysosomal thiol reductase isoform X1 [Fragaria vesca subsp. vesca]
TRINITY_DN297419_c0_g1	TRINITY_DN297419_c0_g1_i1	FvH4_6g10880.1	100	0	528	gamma-interferon-inducible lysosomal thiol reductase-like [Fragaria vesca subsp. vesca]
TRINITY_DN21445_c0_g2	TRINITY_DN21445_c0_g2_i2	FvH4_6g10810.1	100	1e-42	143	gamma-interferon-responsive lysosomal thiol protein-like isoform X2 [Prunus dulcis]
TRINITY_DN2370_c0_g1	TRINITY_DN2370_c0_g1_i4	FvH4_4g11160.1	100	5e-73	242	gamma-secretase subunit APH1-like [Fragaria vesca subsp. vesca]
TRINITY_DN15377_c0_g1	TRINITY_DN15377_c0_g1_i1	FvH4_6g07120.1	100	1e-71	224	GATA transcription factor 23-like [Fragaria vesca subsp. vesca]
TRINITY_DN10225_c0_g1	TRINITY_DN10225_c0_g1_i2	FvH4_5g34500.1	100	4e-85	283	GATA transcription factor 25 [Fragaria vesca subsp. vesca]
TRINITY_DN4287_c0_g1	TRINITY_DN4287_c0_g1_i1	FvH4_1g12220.1	100	0	609	GATA transcription factor 5-like [Fragaria vesca subsp. vesca]
TRINITY_DN7929_c0_g11	TRINITY_DN7929_c0_g1_i11	FvH4_7g19340.1	100	7e-155	479	GATA transcription factor 8 [Fragaria vesca subsp. vesca]
TRINITY_DN8891_c0_g1	TRINITY_DN8891_c0_g1_i2	FvH4_6g32190.1	100	3e-138	410	GATA transcription factor 9-like [Fragaria vesca subsp. vesca]
TRINITY_DN20915_c0_g1	TRINITY_DN20915_c0_g1_i2	FvH4_5g39680.1	100	0	513	GATA transcription factor-like protein
TRINITY_DN267527_c0_g1	TRINITY_DN267527_c0_g1_i1	FvH4_7g25840.1	100	5e-105	305	GATA-type transcription activator \\ 2.50E-46 \\ 55.84 %
TRINITY_DN23251_c0_g2	TRINITY_DN23251_c0_g2_i2	FvH4_2g08260.1	100	1e-160	406	G-box-binding factor 1-like [Fragaria vesca subsp. vesca]
TRINITY_DN11138_c0_g1	TRINITY_DN11138_c0_g1_i4	FvH4_2g13640.1	100	7e-130	400	G-box-binding factor 4-like [Fragaria vesca subsp. vesca]
TRINITY_DN354_c0_g2	TRINITY_DN354_c0_g2_i2	FvH4_5g30210.1	100	2e-87	284	G-box-binding factor 4-like [Fragaria vesca subsp. vesca]<>G-box-binding factor 4-like [Fragaria vesca subsp. vesca]
TRINITY_DN5943_c0_g2	TRINITY_DN5943_c0_g2_i1	FvH4_1g12010.1	100	0	770	GDP-mannose 4,6 dehydratase 1 [Fragaria vesca subsp. vesca]
TRINITY_DN7546_c0_g2	TRINITY_DN7546_c0_g2_i2	FvH4_1g24340.1	100	0	644	GDP-mannose transporter GONST1 [Fragaria vesca subsp. vesca]
TRINITY_DN9147_c0_g1	TRINITY_DN9147_c0_g1_i2	FvH4_3g38300.1	100	0	727	GDP-mannose transporter GONST2 [Fragaria vesca subsp. vesca]<>GDP-mannose transporter GONST2 [Fragaria vesca subsp. vesca]
TRINITY_DN21261_c0_g1	TRINITY_DN21261_c0_g1_i2	FvH4_5g25930.1	100	0	1023	GDP-mannose transporter GONST3 [Fragaria vesca subsp. vesca]
TRINITY_DN10059_c0_g1	TRINITY_DN10059_c0_g1_i2	FvH4_6g35500.1	100	0	608	GDSL esterase/lipase 1-like [Fragaria vesca subsp. vesca]
TRINITY_DN38550_c0_g1	TRINITY_DN38550_c0_g1_i1	FvH4_6g35620.1	100	5e-41	132	GDSL esterase/lipase 2-like [Prunus mume]
TRINITY_DN3655_c0_g1	TRINITY_DN3655_c0_g1_i7	FvH4_5g04800.1	100	0	702	GDSL esterase/lipase 7-like [Fragaria vesca subsp. vesca]
TRINITY_DN18924_c0_g2	TRINITY_DN18924_c0_g2_i1	FvH4_3g06610.1	100	0	752	GDSL esterase/lipase At1g29670-like [Fragaria vesca subsp. vesca]
TRINITY_DN436_c0_g2	TRINITY_DN436_c0_g2_i1	FvH4_6g05330.1	100	0	711	GDSL esterase/lipase At1g54790 isoform X3 [Fragaria vesca subsp. vesca]
TRINITY_DN436_c0_g1	TRINITY_DN436_c0_g1_i1	FvH4_6g05320.1	100	0	559	GDSL esterase/lipase At1g54790-like [Fragaria vesca subsp. vesca]
TRINITY_DN325536_c0_g1	TRINITY_DN325536_c0_g1_i1	FvH4_2g00180.1	100	0	786	GDSL esterase/lipase At1g71250 [Fragaria vesca subsp. vesca]<>GDSL esterase/lipase At1g71250 [Fragaria vesca subsp. vesca]<>GDSL esterase/lipase At1g71250 [Fragaria vesca subsp. vesca]
TRINITY_DN6835_c0_g2	TRINITY_DN6835_c0_g2_i1	FvH4_2g12420.1	100	2e-137	400	GDSL esterase/lipase At1g71250-like [Rosa chinensis]<>putative triacylglycerol lipase [Rosa chinensis]
TRINITY_DN16451_c0_g1	TRINITY_DN16451_c0_g1_i1	FvH4_6g41880.1	100	0	728	GDSL esterase/lipase At2g04570-like [Fragaria vesca subsp. vesca]
TRINITY_DN6311_c0_g1	TRINITY_DN6311_c0_g1_i2	FvH4_1g14780.1	100	3e-173	506	GDSL esterase/lipase At2g23540 [Fragaria vesca subsp. vesca]
TRINITY_DN27174_c0_g2	TRINITY_DN27174_c0_g2_i1	FvH4_6g38660.1	100	0	691	GDSL esterase/lipase At2g42990 [Fragaria vesca subsp. vesca]
TRINITY_DN4370_c0_g1	TRINITY_DN4370_c0_g1_i2	FvH4_4g26020.1	100	0	810	GDSL esterase/lipase At3g26430 [Fragaria vesca subsp. vesca]
TRINITY_DN1035_c0_g1	TRINITY_DN1035_c0_g1_i1	FvH4_7g15800.1	100	0	627	GDSL esterase/lipase At4g01130 isoform X1 [Fragaria vesca subsp. vesca]
TRINITY_DN4334_c0_g2	TRINITY_DN4334_c0_g2_i3	FvH4_5g04760.1	100	0	686	GDSL esterase/lipase At4g10955-like [Fragaria vesca subsp. vesca]
TRINITY_DN5869_c0_g1	TRINITY_DN5869_c0_g1_i1	FvH4_6g38560.1	100	0	795	GDSL esterase/lipase At4g10955-like [Fragaria vesca subsp. vesca]
TRINITY_DN164171_c0_g1	TRINITY_DN164171_c0_g1_i1	FvH4_6g18350.1	100	0	756	GDSL esterase/lipase At5g03610-like [Fragaria vesca subsp. vesca]
TRINITY_DN15334_c0_g1	TRINITY_DN15334_c0_g1_i1	FvH4_6g51890.1	100	0	804	GDSL esterase/lipase At5g14450-like [Fragaria vesca subsp. vesca]
TRINITY_DN16140_c0_g1	TRINITY_DN16140_c0_g1_i1	FvH4_6g01370.1	100	0	734	GDSL esterase/lipase At5g18430-like [Fragaria vesca subsp. vesca]
TRINITY_DN10478_c0_g2	TRINITY_DN10478_c0_g2_i1	FvH4_6g01390.1	100	0	751	GDSL esterase/lipase At5g33370-like [Fragaria vesca subsp. vesca]
TRINITY_DN156095_c0_g1	TRINITY_DN156095_c0_g1_i2	FvH4_2g15980.1	100	3e-99	295	GDSL esterase/lipase At5g33370-like [Fragaria vesca subsp. vesca]
TRINITY_DN6444_c0_g12	TRINITY_DN6444_c0_g1_i12	FvH4_3g08070.1	100	2e-67	231	GDSL esterase/lipase At5g45920 [Fragaria vesca subsp. vesca]
TRINITY_DN310756_c0_g1	TRINITY_DN310756_c0_g1_i1	FvH4_2g15970.1	100	2e-86	260	GDSL esterase/lipase At5g55050-like [Fragaria vesca subsp. vesca]
TRINITY_DN34924_c0_g1	TRINITY_DN34924_c0_g1_i3	FvH4_4g05550.1	100	0	584	GDT1-like protein 2, chloroplastic [Fragaria vesca subsp. vesca]
TRINITY_DN11245_c0_g1	TRINITY_DN11245_c0_g1_i2	FvH4_2g18080.1	100	5e-161	461	GEM-like protein 2
TRINITY_DN12944_c0_g1	TRINITY_DN12944_c0_g1_i2	FvH4_5g18490.1	100	2e-144	430	GEM-like protein 4 [Fragaria vesca subsp. vesca]
TRINITY_DN4183_c0_g1	TRINITY_DN4183_c0_g1_i5	FvH4_4g23040.1	100	0	540	GEM-like protein 5 [Fragaria vesca subsp. vesca]
TRINITY_DN5576_c0_g1	TRINITY_DN5576_c0_g1_i3	FvH4_5g18220.1	100	0	1631	general negative regulator of transcription subunit 3 isoform X1 [Fragaria vesca subsp. vesca]
TRINITY_DN990_c1_g2	TRINITY_DN990_c1_g2_i6	FvH4_2g25610.1	100	0	904	general transcription factor 3C polypeptide 3-like [Fragaria vesca subsp. vesca]
TRINITY_DN79120_c0_g1	TRINITY_DN79120_c0_g1_i1	FvH4_2g23680.1	100	4e-42	134	general transcription factor 3C polypeptide 5-like isoform X1 [Fragaria vesca subsp. vesca]<>general transcription factor 3C polypeptide 5-like isoform X1 [Fragaria vesca subsp. vesca]
TRINITY_DN754_c1_g2	TRINITY_DN754_c1_g2_i1	FvH4_4g24640.1	100	3e-134	380	geraniol 8-hydroxylase-like [Fragaria vesca subsp. vesca]
TRINITY_DN9428_c0_g1	TRINITY_DN9428_c0_g1_i1	FvH4_5g14870.1	100	0	923	geranylgeranyl diphosphate reductase, chloroplastic [Fragaria vesca subsp. vesca]
[truncated: 14,766 more rows]

## Sheet: KEGG_orthologs
Trinity_ID	Longest transcript isoforms_ID	F. vesca Hawaii4_ID	pct_identity	e_value	Bit_Score	Match	Description
[truncated: 4,415 more rows]

[truncated: 2 more sheets: InterPro domain, Final]
