# Supplementary material for: Comparative Transcriptome Analysis Reveals Novel Candidate Resistance Genes Involved in Defence against Phytophthora cactorum in Strawberry
Source: Int J Mol Sci. 2023 Jun 29;24(13):10851. doi: 10.3390/ijms241310851 (PMC10341869; doi:10.3390/ijms241310851)
Supplement: Supplementary file 1 [file ijms-24-10851-s001.zip › Supplementary_material_S2.xlsx]

## Sheet: Description
Supplementary Material S2: Genes differentially expressed between resistant and susceptible Fragaria vesca genotypes after inoculation with Phytophthora cactorum.
Sheet name	Description
N12I48 vs. N16I48, P<0.05	Fragaria vesca genes differentially expressed (fold change ≥ 2 or ≤ -2 , P < 0.05) between the susceptible genotype NCGR1218 (N12) and the resistant genotype NCGR1603 (N16) 48 hours after inoculation with Phytophthora cactorum.
N12I48 vs. BukI48, P<0.05	F. vesca genes differentially expressed (fold change ≥ 2 or ≤ -2 , P < 0.05) between the susceptible genotype NCGR1218 (N12) and the resistant genotype Bukammen 48 hours after inoculation with P. cactorum.
Distinct genes_N16 & Buk	F.vesca genes expressed only in the resistant genotypes NCGR1603 (N16) and Bukammen (Buk)and not in the susceptible genotype NCGR1218 (N12) 48 hours after inoculation with P. cactorum. Only transcripts with TPM ≥ 1 are shown.
Shared distinct genes_N16+Buk	Shared genes expressed only in the resistant genotypes (NCGR1603 and Bukammen) 48 hours after inoculation with P. cactorum.
NLRs, RLKs & RLPs common	Selected differentially expressed genes belonging to putative nucleotide-binding and leucine-rich repeat proteins (NLRs), receptor-like kinases (RLKs) and receptor-like proteins (RLPs). Comparisons were made between the susceptible genotype NCGR1218 (N12) and the resistance genotypes NCGR1603 (N16) and Bukammen (BK) 48 hours after inoculation with P. cactorum.
RPc-1 locus genes	Differentially expressed genes (DEGs) from the resistant locus RPc-1 (Resistance to Phytophthora cactorum 1) in the F. vesca genotypes. Comparisons were made between the susceptible genotype NCGR1218 (N12) and the resistance genotypes NCGR1603 (N16) and Bukammen (BK) 48 hours after inoculation with P. cactorum.
Shared RPc-1 locus genes	Differentially expressed genes (DEGs) from the resistant locus RPc-1 (Resistance to Phytophthora cactorum 1) common to the resistant genotypes. Comparisons were made between the susceptible genotype NCGR1218 (N12) and the resistance genotypes NCGR1603 (N16) and Bukammen (BK) 48 hours after inoculation with P. cactorum.
PR genes	Differentially expressed genes (DEGs) belonging to putative pathogenesis-related protein families. Comparisons were made between the susceptible genotype NCGR1218 (N12) and the resistance genotypes NCGR1603 (N16) and Bukammen (BK) 48 hours after inoculation with P. cactorum.

## Sheet: N12I48 vs. N16I48, P<0.05
				NCGR1218_wounded-inoculated_WI-48h Vs NCGR1603_wounded-inoculated_WI-48h
Trinity_ID	Fragaria_vesca4.0_ID	1218_WI-48h Mean (TPM)	1603_WI-48h Mean (TPM)	Difference (TPM)	Fold change	P-value	FDR corrected p-value	NCBI_Nr_Annotations (<1E-3) with GO terms	Fragaria_vesca4.0_KEGG_orthologs_annotations	Fragaria_vesca4.0_InterPro_domain_annotations
Upregulated genes in NCGR1603
TRINITY_DN32206_c0_g1	FvH4_5g24630.1	0	134.481	134.481	#DIV/0!	6.42373e-05	0.0317141	---NA--- \\ 1.30E-84 \\ 66.50 % \\ GO:0045263-IEA;GO:0005739-IEA;GO:0016020-IEA;GO:0016021-IEA;GO:0016787-IEA;GO:0015986-IEA;GO:0015078-IEA;GO:0009579-IEA;GO:0042651-IEA;GO:0006811-IEA;GO:0046933-IEA;GO:0099132-IEA;GO:0005743-IEA;GO:0005886-IEA;GO:0006754-IEA \\ proton-transporting ATP synthase complex, coupling factor F(o)-IEA;mitochondrion-IEA;membrane-IEA;integral component of membrane-IEA;hyd…
TRINITY_DN5990_c0_g1	FvH4_6g46560.1	0	53.2225	53.2225	#DIV/0!	0.000487358	0.0999067	hypothetical protein T07_5763, partial
TRINITY_DN643_c1_g3	FvH4_4g20050.1	0	34.8407	34.8407	#DIV/0!	8.28544e-08	0.00167781	---NA--- \\ 5.40E-07 \\ 95.29 % \\ GO:0005737-IEA;GO:0016020-IEA;GO:0048280-IEA;GO:0008565-IEA;GO:0000139-IEA;GO:0006886-IEA \\ cytoplasm-IEA;membrane-IEA;vesicle fusion with Golgi apparatus-IEA;protein transporter activity-IEA;Golgi membrane-IEA;intracellular protein transport-IEA
TRINITY_DN2618_c0_g3	FvH4_5g36680.1	0	33.86	33.86	#DIV/0!	0.00137966	0.181111	histone H3.3	histone H3
TRINITY_DN2880_c1_g1	FvH4_7g05680.1	0	27.9952	27.9952	#DIV/0!	3.6993e-07	0.00271343	protein DJ-1 homolog D-like \\ 2.20E-133 \\ 92.62 % \\ GO:0016829-IEA;GO:0004462-IEA \\ lyase activity-IEA;lactoylglutathione lyase activity-IEA \\ GO:0004462 \\ lactoylglutathione lyase activity	D-lactate dehydratase [EC:4.2.1.130]	DJ-1/PfpI
TRINITY_DN544_c0_g2	FvH4_1g22440.1	0	27.889	27.889	#DIV/0!	1.21878e-08	0.000625785	putative galactose oxidase/kelch, beta-propeller, galactose oxidase, beta-propeller \\ 0.00E+00 \\ 63.78 %		Kelch-type beta propeller
TRINITY_DN13303_c0_g2	FvH4_6g53350.1	0	26.6792	26.6792	#DIV/0!	9.73085e-06	0.0108242	protease HtpX homolog \\ 7.50E-138 \\ 58.13 %		Peptidase M48
TRINITY_DN7116_c0_g1	FvH4_6g12080.1	0	22.0515	22.0515	#DIV/0!	0.00134178	0.17802	PREDICTED: uncharacterized protein LOC101292912 \\ 5.40E-155 \\ 74.58 % \\ GO:0009691-IEA;GO:0009691-IBA;GO:0005829-IBA;GO:0016787-IEA;GO:0005634-IBA;GO:0016799-IBA \\ cytokinin biosynthetic process-IEA;cytokinin biosynthetic process-IBA;cytosol-IBA;hydrolase activity-IEA;nucleus-IBA;hydrolase activity, hydrolyzing N-glycosyl compounds-IBA \\ GO:0005634;GO:0005829;GO:0009691;GO:0016799 \\ nucleus…
TRINITY_DN7097_c0_g1	FvH4_3g21000.1	0	20.2112	20.2112	#DIV/0!	8.10414e-07	0.00372633	PREDICTED: uncharacterized protein LOC101291996 \\ 5.00E-64 \\ 95.50 % \\ GO:0015035-IEA;GO:0016491-IEA;GO:0045454-IEA;GO:0009055-IEA;GO:0055114-IEA;GO:0004791-IEA;GO:0022900-IEA;GO:0098869-IEA;GO:0005623-IEA \\ protein disulfide oxidoreductase activity-IEA;oxidoreductase activity-IEA;cell redox homeostasis-IEA;electron transfer activity-IEA;oxidation-reduction process-IEA;thioredoxin-disulfide r…
TRINITY_DN14674_c2_g1	FvH4_3g29050.1	0	18.023	18.023	#DIV/0!	1.18924e-05	0.0120516	---NA--- \\ 7.90E-04 \\ 76.00 %
TRINITY_DN4011_c0_g1	FvH4_7g20440.1	0	16.3105	16.3105	#DIV/0!	1.96209e-07	0.00208435	Zinc finger BED domain-containing protein DAYSLEEPER \\ 0.00E+00 \\ 58.03 % \\ GO:0003677-IEA;GO:0009791-IEA;GO:0046983-IEA;GO:0005829-IEA \\ DNA binding-IEA;post-embryonic development-IEA;protein dimerization activity-IEA;cytosol-IEA
TRINITY_DN2076_c0_g1	FvH4_6g30660.1	0	13.792	13.792	#DIV/0!	8.90869e-06	0.0103646	putative HAD-like domain, mitochondrial PGP phosphatase \\ 1.30E-05 \\ 95.66 % \\ GO:0005506-IEA;GO:0016491-IEA;GO:0016020-IEA;GO:0016021-IEA;GO:0008610-IEA;GO:0055114-IEA \\ iron ion binding-IEA;oxidoreductase activity-IEA;membrane-IEA;integral component of membrane-IEA;lipid biosynthetic process-IEA;oxidation-reduction process-IEA
TRINITY_DN645_c0_g1	FvH4_7g12210.1	0	11.1442	11.1442	#DIV/0!	2.53684e-05	0.0185635	B3 domain-containing protein REM8-like \\ 3.10E-153 \\ 58.33 % \\ GO:0003677-IEA;GO:0006351-IEA;GO:0006355-IEA;GO:0005634-IEA \\ DNA binding-IEA;transcription, DNA-templated-IEA;regulation of transcription, DNA-templated-IEA;nucleus-IEA		B3 DNA binding domain
TRINITY_DN234107_c0_g1	FvH4_5g03090.1	0	10.875	10.875	#DIV/0!	0.00778488	0.504453	putative clostridium epsilon toxin ETX/ mosquitocidal toxin MTX2, Agglutinin \\ 0.00E+00 \\ 50.43 % \\ GO:0005576-IEA;GO:0009405-IEA \\ extracellular region-IEA;pathogenesis-IEA		Agglutinin domain
TRINITY_DN4197_c0_g2	FvH4_3g14180.1	0	10.363	10.363	#DIV/0!	3.23599e-05	0.0215316	kinase RLK-Pelle-LRR-XI-1 family \\ 0.00E+00 \\ 76.85 % \\ GO:0000166-IEA;GO:0016020-IEA;GO:0016021-IEA;GO:0004672-IEA;GO:0016740-IEA;GO:0005524-IEA;GO:0006468-IEA \\ nucleotide binding-IEA;membrane-IEA;integral component of membrane-IEA;protein kinase activity-IEA;transferase activity-IEA;ATP binding-IEA;protein phosphorylation-IEA \\ GO:0004672;GO:0005524;GO:0006468;GO:0016021 \\ protein kinase…		Protein kinase domain
TRINITY_DN10553_c0_g3	FvH4_6g52080.1	0	9.1715	9.1715	#DIV/0!	1.696e-05	0.0149282	F-box protein At5g07610-like \\ 5.50E-44 \\ 82.17 % \\ GO:0043531-IEA;GO:0016787-IEA \\ ADP binding-IEA;hydrolase activity-IEA \\ GO:0016787;GO:0043531 \\ hydrolase activity;ADP binding		F-box domain
TRINITY_DN906_c1_g1	FvH4_6g51960.1	0	8.8685	8.8685	#DIV/0!	1.27608e-06	0.00432946	probable mitochondrial saccharopine dehydrogenase-like oxidoreductase At5g39410 \\ 4.00E-51 \\ 54.80 %
TRINITY_DN8940_c0_g1	FvH4_5g16110.1	0	7.69775	7.69775	#DIV/0!	2.76622e-06	0.00631223	putative disease resistance RPP13-like protein 1 \\ 0.00E+00 \\ 60.39 % \\ GO:0016020-IEA;GO:0016021-IEA;GO:0043531-IEA;GO:0016787-IEA \\ membrane-IEA;integral component of membrane-IEA;ADP binding-IEA;hydrolase activity-IEA		Leucine-rich repeat
TRINITY_DN434_c0_g1	FvH4_7g04550.1	0	7.61225	7.61225	#DIV/0!	7.12755e-05	0.0333802	PREDICTED: uncharacterized protein LOC101299325 \\ 8.80E-20 \\ 82.59 %
TRINITY_DN45_c0_g2	FvH4_6g34080.1	0	6.5095	6.5095	#DIV/0!	1.62694e-06	0.00491384	putative transcription factor C2H2 family \\ 2.60E-64 \\ 87.42 %		Zinc finger, RING-type
TRINITY_DN199127_c0_g1	FvH4_3g29330.1	0	6.45	6.45	#DIV/0!	0.00254926	0.260827	vegetative cell wall protein gp1-like \\ 5.90E-61 \\ 88.13 %
TRINITY_DN7496_c0_g6	FvH4_5g32170.1	0	6.43125	6.43125	#DIV/0!	0.0275256	0.929067	proteinase inhibitor PSI-1.2 \\ 5.50E-98 \\ 83.57 % \\ GO:0030246-IEA \\ carbohydrate binding-IEA \\ GO:0030246 \\ carbohydrate binding		Proteinase inhibitor I20
TRINITY_DN17843_c0_g1	FvH4_1g22450.1	0	6.1155	6.1155	#DIV/0!	1.12588e-05	0.0116393	PREDICTED: uncharacterized protein LOC101300281 \\ 0.00E+00 \\ 56.82 %
TRINITY_DN7469_c0_g1	FvH4_3g27010.1	0	5.69975	5.69975	#DIV/0!	7.69589e-05	0.0350476	---NA---
TRINITY_DN26906_c0_g1	FvH4_6g09720.1	0	5.6395	5.6395	#DIV/0!	0.00126883	0.172232	protein FAR1-RELATED SEQUENCE 5-like \\ 0.00E+00 \\ 56.72 % \\ GO:0016888-IEA;GO:0006259-IEA \\ endodeoxyribonuclease activity, producing 5'-phosphomonoesters-IEA;DNA metabolic process-IEA
TRINITY_DN2096_c0_g1	FvH4_1g02400.1	0	5.3915	5.3915	#DIV/0!	3.41699e-05	0.0221615	---NA---
TRINITY_DN25210_c0_g1	FvH4_7g15250.1	0	5.04325	5.04325	#DIV/0!	2.01042e-06	0.00544055	---NA---
TRINITY_DN3110_c0_g1	FvH4_4g26780.1	0	4.86325	4.86325	#DIV/0!	0.00275752	0.274124	---NA--- \\ 1.70E-09 \\ 72.19 % \\ GO:0006418-IEA;GO:0000166-IEA;GO:0005737-IEA;GO:0004812-IEA;GO:0016740-IEA;GO:0006436-IEA;GO:0006436-IBA;GO:0016874-IEA;GO:0006412-IEA;GO:0005524-IEA;GO:0004830-IEA;GO:0004830-IBA \\ tRNA aminoacylation for protein translation-IEA;nucleotide binding-IEA;cytoplasm-IEA;aminoacyl-tRNA ligase activity-IEA;transferase activity-IEA;tryptophanyl-tRNA aminoacylation-IEA…
TRINITY_DN176034_c0_g1	FvH4_7g10550.1	0	4.79225	4.79225	#DIV/0!	7.30217e-07	0.00361605	PREDICTED: uncharacterized protein LOC105352887 \\ 1.00E-17 \\ 97.46 % \\ GO:0051225-IEA;GO:0031023-IEA \\ spindle assembly-IEA;microtubule organizing center organization-IEA \\ GO:0031023;GO:0051225 \\ microtubule organizing center organization;spindle assembly
TRINITY_DN10417_c0_g1	FvH4_5g19110.1	0	4.72575	4.72575	#DIV/0!	0.004341	0.357958	probable aquaporin TIP2-2 \\ 4.20E-12 \\ 90.32 % \\ GO:0016020-IEA;GO:0016021-IEA \\ membrane-IEA;integral component of membrane-IEA \\ GO:0016021 \\ integral component of membrane		Major intrinsic protein
TRINITY_DN344_c0_g2	FvH4_3g14380.1	0	4.60475	4.60475	#DIV/0!	0.0024672	0.255745	putative fruit bromelain \\ 2.10E-11 \\ 95.38 %	cathepsin L [EC:3.4.22.15]	Cysteine peptidase, cysteine active site
TRINITY_DN4981_c1_g2	FvH4_3g40580.1	0	4.45475	4.45475	#DIV/0!	0.00011153	0.0439937	---NA--- \\ 0.00E+00 \\ 83.60 % \\ GO:0016020-IEA;GO:0016021-IEA;GO:0016310-IEA;GO:0016740-IEA;GO:0016301-IEA;GO:0030246-IEA;GO:0004674-IEA;GO:0006468-IEA \\ membrane-IEA;integral component of membrane-IEA;phosphorylation-IEA;transferase activity-IEA;kinase activity-IEA;carbohydrate binding-IEA;protein serine/threonine kinase activity-IEA;protein phosphorylation-IEA \\ GO:0004674;GO:0006468;GO:00…
TRINITY_DN1105_c1_g1	FvH4_6g41010.1	0	4.29575	4.29575	#DIV/0!	0.000326936	0.0798725	---NA---
TRINITY_DN4933_c0_g1	FvH4_5g07350.1	0	4.20675	4.20675	#DIV/0!	0.00016035	0.0531744	F-box/kelch-repeat protein At3g06240-like \\ 0.00E+00 \\ 61.01 %		F-box domain
TRINITY_DN16817_c0_g1	FvH4_3g28530.1	0	4.10125	4.10125	#DIV/0!	0.00015509	0.052274	glucan endo-1,3-beta-glucosidase 11-like \\ 2.50E-05 \\ 97.67 %
TRINITY_DN4339_c1_g1	FvH4_6g00620.1	0	3.997	3.997	#DIV/0!	4.64963e-07	0.00304768	putative transcription factor C2H2 family \\ 9.80E-98 \\ 65.42 % \\ GO:0008270-IEA;GO:0046872-IEA;GO:0016874-IEA \\ zinc ion binding-IEA;metal ion binding-IEA;ligase activity-IEA \\ GO:0046872 \\ metal ion binding		Zinc finger, RING-type
TRINITY_DN932_c0_g1	FvH4_5g16070.1	0	3.784	3.784	#DIV/0!	3.17885e-06	0.0067076	putative disease resistance RPP13-like protein 1 \\ 0.00E+00 \\ 74.13 % \\ GO:0043531-IEA \\ ADP binding-IEA \\ GO:0043531 \\ ADP binding		Toll/interleukin-1 receptor homology (TIR) domain
TRINITY_DN4859_c1_g1	FvH4_1g19470.1	0	3.59475	3.59475	#DIV/0!	6.84372e-05	0.0327892	putative RNA-directed DNA polymerase \\ 0.00E+00 \\ 56.87 % \\ GO:0003964-IEA;GO:0016779-IEA;GO:0090502-IEA;GO:0006278-IEA;GO:0016740-IEA;GO:0004523-IEA;GO:0003676-IEA \\ RNA-directed DNA polymerase activity-IEA;nucleotidyltransferase activity-IEA;RNA phosphodiester bond hydrolysis, endonucleolytic-IEA;RNA-dependent DNA biosynthetic process-IEA;transferase activity-IEA;RNA-DNA hybrid ribonuclease…
TRINITY_DN26864_c2_g1	FvH4_5g20780.1	0	3.5625	3.5625	#DIV/0!	2.16649e-05	0.0170263	putative leucine-rich repeat-containing, plant-type, leucine-rich repeat domain, L \\ 0.00E+00 \\ 77.04 % \\ GO:0016020-IEA;GO:0016021-IEA;GO:0016310-IEA;GO:0016740-IEA;GO:0016301-IEA;GO:0004674-IEA;GO:0006468-IEA \\ membrane-IEA;integral component of membrane-IEA;phosphorylation-IEA;transferase activity-IEA;kinase activity-IEA;protein serine/threonine kinase activity-IEA;protein phosphorylation-…		Leucine-rich repeat
TRINITY_DN8578_c1_g2	FvH4_6g40960.1	0	3.55225	3.55225	#DIV/0!	2.55756e-06	0.00601455	cyclic nucleotide-gated ion channel 1-like \\ 4.10E-141 \\ 71.73 % \\ GO:0055085-IEA;GO:0090502-IEA;GO:0016020-IEA;GO:0016021-IEA;GO:0034220-IEA;GO:0006811-IEA;GO:0004523-IEA;GO:0005216-IEA;GO:0003676-IEA \\ transmembrane transport-IEA;RNA phosphodiester bond hydrolysis, endonucleolytic-IEA;membrane-IEA;integral component of membrane-IEA;ion transmembrane transport-IEA;ion transport-IEA;RNA-DNA h…		Cyclic nucleotide-binding domain
TRINITY_DN4203_c0_g1	FvH4_6g52860.1	0	3.5	3.5	#DIV/0!	3.50471e-06	0.00706495	putative F-box associated domain, type 1 \\ 0.00E+00 \\ 55.66 %
TRINITY_DN7361_c0_g2	FvH4_5g22560.1	0	3.49475	3.49475	#DIV/0!	0.000453938	0.0964438	putative HAD-like domain, mitochondrial PGP phosphatase
TRINITY_DN10672_c0_g2	FvH4_7g17200.1	0	3.37775	3.37775	#DIV/0!	0.00117078	0.164003	eukaryotic translation initiation factor 3 subunit G-like \\ 0.00E+00 \\ 75.01 % \\ GO:0046983-IEA \\ protein dimerization activity-IEA \\ GO:0046983 \\ protein dimerization activity
TRINITY_DN7283_c0_g1	FvH4_5g07480.1	0	3.2895	3.2895	#DIV/0!	0.000185434	0.0577318	probable alkaline/neutral invertase F \\ 1.80E-42 \\ 86.11 % \\ GO:0008152-IEA;GO:0033926-IEA;GO:0003824-IEA;GO:0004564-IEA;GO:0016798-IEA;GO:0016787-IEA \\ metabolic process-IEA;glycopeptide alpha-N-acetylgalactosaminidase activity-IEA;catalytic activity-IEA;beta-fructofuranosidase activity-IEA;hydrolase activity, acting on glycosyl bonds-IEA;hydrolase activity-IEA \\ GO:0004564;GO:0008152;GO:00…		Six-hairpin glycosidase-like
TRINITY_DN29408_c0_g2	FvH4_1g00900.1	0	3.22975	3.22975	#DIV/0!	0.00348722	0.313976	PREDICTED: uncharacterized protein LOC105351007
TRINITY_DN6055_c0_g1	FvH4_6g49500.1	0	3.22425	3.22425	#DIV/0!	0.00642105	0.450497	TMV resistance protein N-like \\ 0.00E+00 \\ 79.65 %		Toll/interleukin-1 receptor homology (TIR) domain
TRINITY_DN472_c2_g1	FvH4_2g07270.1	0	3.01125	3.01125	#DIV/0!	0.0270996	0.929067	---NA--- \\ 1.00E-48 \\ 89.53 % \\ GO:0007165-IEA;GO:0043531-IEA;GO:0016787-IEA \\ signal transduction-IEA;ADP binding-IEA;hydrolase activity-IEA \\ GO:0007165;GO:0016787;GO:0043531 \\ signal transduction;hydrolase activity;ADP binding
TRINITY_DN8415_c4_g1	FvH4_5g19280.1	0	2.95325	2.95325	#DIV/0!	9.38039e-05	0.0391044	---NA--- \\ 7.40E-09 \\ 45.93 % \\ GO:0007155-IEA;GO:0016020-IEA;GO:0016021-IEA;GO:0005509-IEA;GO:0007229-IEA \\ cell adhesion-IEA;membrane-IEA;integral component of membrane-IEA;calcium ion binding-IEA;integrin-mediated signaling pathway-IEA
TRINITY_DN228_c0_g1	FvH4_6g04580.1	0	2.881	2.881	#DIV/0!	0.00241543	0.25253	---NA--- \\ 0.00E+00 \\ 72.53 % \\ GO:0010090-IBA \\ trichome morphogenesis-IBA
TRINITY_DN45_c0_g3	FvH4_6g51870.1	0	2.85525	2.85525	#DIV/0!	0.000539067	0.10598	putative transcription factor C2H2 family		Zinc finger, RING-type
TRINITY_DN1854_c0_g1	FvH4_6g10410.1	0	2.63375	2.63375	#DIV/0!	0.000818286	0.132609	---NA--- \\ 2.10E-120 \\ 93.45 % \\ GO:0016614-IEA;GO:0050660-IEA;GO:0016491-IEA;GO:0055114-IEA;GO:0008812-IEA \\ oxidoreductase activity, acting on CH-OH group of donors-IEA;flavin adenine dinucleotide binding-IEA;oxidoreductase activity-IEA;oxidation-reduction process-IEA;choline dehydrogenase activity-IEA \\ GO:0008812;GO:0050660;GO:0055114 \\ choline dehydrogenase activity;flavin adenine dinu…
TRINITY_DN6799_c1_g2	FvH4_3g45070.1	0	2.56075	2.56075	#DIV/0!	3.27483e-09	0.000336292	putative transcription factor C2H2 family \\ 0.00E+00 \\ 54.59 % \\ GO:0008270-IEA;GO:0046872-IEA;GO:0016020-IEA;GO:0016021-IEA \\ zinc ion binding-IEA;metal ion binding-IEA;membrane-IEA;integral component of membrane-IEA		Zinc finger, RING-type
TRINITY_DN3922_c0_g2	FvH4_7g03370.1	0	2.47575	2.47575	#DIV/0!	2.40103e-10	3.69842e-05	PREDICTED: uncharacterized protein LOC101300954 \\ 5.00E-08 \\ 51.03 %
TRINITY_DN4910_c0_g2	FvH4_3g11010.1	0	2.426	2.426	#DIV/0!	1.31671e-05	0.0130012	berberine bridge enzyme-like 8 \\ 0.00E+00 \\ 88.34 % \\ GO:0071949-IEA;GO:0016491-IEA;GO:0003824-IEA;GO:0050660-IEA;GO:0055114-IEA;GO:0050328-IEA \\ FAD binding-IEA;oxidoreductase activity-IEA;catalytic activity-IEA;flavin adenine dinucleotide binding-IEA;oxidation-reduction process-IEA;tetrahydroberberine oxidase activity-IEA \\ GO:0050328;GO:0055114;GO:0071949 \\ tetrahydroberberine oxidase ac…		FAD linked oxidase, N-terminal
TRINITY_DN160_c0_g1	FvH4_4g01970.1	0	2.409	2.409	#DIV/0!	0.000522335	0.103903	putative F-box domain-containing protein \\ 0.00E+00 \\ 74.97 %		F-box domain
TRINITY_DN6768_c0_g3	FvH4_2g00380.1	0	2.40625	2.40625	#DIV/0!	0.000141958	0.0493506	---NA--- \\ 1.40E-85 \\ 85.58 % \\ GO:0003964-IEA;GO:0016779-IEA;GO:0008270-IEA;GO:0006278-IEA;GO:0015074-IEA;GO:0000943-IEA;GO:0016740-IEA;GO:0003676-IEA \\ RNA-directed DNA polymerase activity-IEA;nucleotidyltransferase activity-IEA;zinc ion binding-IEA;RNA-dependent DNA biosynthetic process-IEA;DNA integration-IEA;retrotransposon nucleocapsid-IEA;transferase activity-IEA;nucleic acid binding-I…
TRINITY_DN1568_c0_g2	FvH4_7g27680.1	0	2.29775	2.29775	#DIV/0!	0.000244531	0.0672014	C2 calcium-dependent membrane targeting \\ 1.10E-25 \\ 58.69 % \\ GO:0016459-IEA;GO:0000166-IEA;GO:0003779-IEA;GO:0051276-IEA;GO:0005694-IEA;GO:0005524-IEA;GO:0003774-IEA \\ myosin complex-IEA;nucleotide binding-IEA;actin binding-IEA;chromosome organization-IEA;chromosome-IEA;ATP binding-IEA;motor activity-IEA
TRINITY_DN8908_c0_g1	FvH4_1g00790.1	0	2.278	2.278	#DIV/0!	0.000268924	0.0708098	---NA---
TRINITY_DN506_c0_g1	FvH4_3g36980.1	0	2.2685	2.2685	#DIV/0!	0.000150442	0.0513748	---NA---
TRINITY_DN6244_c0_g1	FvH4_4g00980.1	0	2.23275	2.23275	#DIV/0!	0.000746912	0.125807	---NA---
TRINITY_DN1305_c1_g3	FvH4_5g35070.1	0	2.229	2.229	#DIV/0!	0.001644	0.200231	putative pentatricopeptide \\ 0.00E+00 \\ 68.21 % \\ GO:0016020-IEA;GO:0016021-IEA \\ membrane-IEA;integral component of membrane-IEA		Pentatricopeptide repeat
TRINITY_DN879_c1_g1	FvH4_4g27840.1	0	2.2225	2.2225	#DIV/0!	0.000120792	0.045716	PREDICTED: uncharacterized protein LOC101311666 isoform X3
TRINITY_DN1030_c1_g3	FvH4_1g15280.1	0	2.216	2.216	#DIV/0!	0.00479292	0.380354	---NA--- \\ 3.40E-176 \\ 92.62 % \\ GO:0005737-IEA;GO:0003735-IEA;GO:0022627-IEA;GO:0005829-IBA;GO:0005840-IEA;GO:0006412-IEA;GO:0005622-IEA \\ cytoplasm-IEA;structural constituent of ribosome-IEA;cytosolic small ribosomal subunit-IEA;cytosol-IBA;ribosome-IEA;translation-IEA;intracellular-IEA \\ GO:0003735;GO:0006412;GO:0022627 \\ structural constituent of ribosome;translation;cytosolic small rib…
TRINITY_DN173_c3_g1	FvH4_5g38980.1	0	2.204	2.204	#DIV/0!	0.00411925	0.346347	---NA--- \\ 3.10E-71 \\ 72.07 % \\ GO:0005509-IEA \\ calcium ion binding-IEA
TRINITY_DN1124_c0_g4	FvH4_3g42360.1	0	2.18425	2.18425	#DIV/0!	0.000863523	0.137268	putative F-box domain-containing protein \\ 0.00E+00 \\ 64.94 %		F-box domain
TRINITY_DN31409_c1_g1	FvH4_7g07020.1	0	2.16325	2.16325	#DIV/0!	0.00156444	0.196077	putative aerolysin, Agglutinin domain, aerolysin-like toxin, beta complex domain-containing protein \\ 0.00E+00 \\ 70.36 % \\ GO:0016020-IEA;GO:0016021-IEA;GO:0005576-IEA;GO:0009405-IEA \\ membrane-IEA;integral component of membrane-IEA;extracellular region-IEA;pathogenesis-IEA \\ GO:0005576;GO:0009405;GO:0016021 \\ extracellular region;pathogenesis;integral component of membrane		Aerolysin-like toxin
TRINITY_DN2470_c0_g1	FvH4_3g31440.1	0	2.1595	2.1595	#DIV/0!	3.27724e-07	0.00246249	PREDICTED: uncharacterized protein LOC101297504 \\ 6.60E-46 \\ 98.70 %
TRINITY_DN2431_c1_g1	FvH4_5g11120.1	0	2.08275	2.08275	#DIV/0!	2.60854e-05	0.0187711	putative powdery mildew resistance protein, RPW8 \\ 0.00E+00 \\ 63.62 % \\ GO:0003677-IEA;GO:0000981-IEA;GO:0055085-IEA;GO:0008270-IEA;GO:0006351-IEA;GO:0046872-IEA;GO:0016020-IEA;GO:0016021-IEA;GO:0006355-IEA;GO:0006357-IEA;GO:0005634-IEA \\ DNA binding-IEA;DNA-binding transcription factor activity, RNA polymerase II-specific-IEA;transmembrane transport-IEA;zinc ion binding-IEA;transcription, DN…		Powdery mildew resistance protein, RPW8 domain
TRINITY_DN1305_c1_g4	FvH4_5g35080.1	0	2.05325	2.05325	#DIV/0!	0.00478908	0.380265	putative pentatricopeptide \\ 0.00E+00 \\ 62.60 %		Pentatricopeptide repeat
TRINITY_DN2156_c1_g1	FvH4_6g51760.1	0	2.04675	2.04675	#DIV/0!	6.91063e-06	0.00939104	---NA--- \\ 4.90E-04 \\ 92.00 %
TRINITY_DN3128_c0_g2	FvH4_2g12170.1	0	2.02175	2.02175	#DIV/0!	6.38785e-06	0.00929693	protein FAR1-RELATED SEQUENCE 5-like \\ 0.00E+00 \\ 64.61 % \\ GO:0008270-IEA;GO:0006355-IEA \\ zinc ion binding-IEA;regulation of transcription, DNA-templated-IEA
TRINITY_DN4006_c1_g1	FvH4_5g21270.1	0	1.93925	1.93925	#DIV/0!	0.000196196	0.0594317	---NA--- \\ 2.70E-48 \\ 89.87 % \\ GO:0003723-IEA;GO:0003723-IBA;GO:0003735-IEA;GO:0003735-IBA;GO:0022625-IBA;GO:0005840-IEA;GO:0006412-IEA;GO:0005622-IEA \\ RNA binding-IEA;RNA binding-IBA;structural constituent of ribosome-IEA;structural constituent of ribosome-IBA;cytosolic large ribosomal subunit-IBA;ribosome-IEA;translation-IEA;intracellular-IEA \\ GO:0003723;GO:0003735;GO:0006412;GO:0022625…
TRINITY_DN10339_c0_g1	FvH4_2g17020.1	0	1.85825	1.85825	#DIV/0!	0.00069683	0.120993	tubulin-tyrosine ligase \\ 1.50E-09 \\ 78.17 % \\ GO:0032440-IEA;GO:0016491-IEA;GO:0016020-IEA;GO:0016021-IEA;GO:0055114-IEA;GO:0016310-IEA;GO:0016301-IEA \\ 2-alkenal reductase [NAD(P)] activity-IEA;oxidoreductase activity-IEA;membrane-IEA;integral component of membrane-IEA;oxidation-reduction process-IEA;phosphorylation-IEA;kinase activity-IEA \\ GO:0016021;GO:0016301;GO:0016310;GO:0016491 \\ i…
TRINITY_DN8181_c1_g1	FvH4_7g04570.1	0	1.8375	1.8375	#DIV/0!	5.82449e-05	0.0301066	MATH domain and coiled-coil domain-containing protein At3g58210-like isoform X4 \\ 2.90E-119 \\ 70.46 % \\ GO:0006508-IEA;GO:0036459-IEA;GO:0016787-IEA \\ proteolysis-IEA;thiol-dependent ubiquitinyl hydrolase activity-IEA;hydrolase activity-IEA \\ GO:0016787 \\ hydrolase activity		MATH/TRAF domain
TRINITY_DN15211_c0_g4	FvH4_3g42520.1	0	1.81225	1.81225	#DIV/0!	0.00158974	0.197552	PREDICTED: uncharacterized protein LOC105351030 isoform X1
TRINITY_DN5893_c0_g1	FvH4_6g18970.1	0	1.7875	1.7875	#DIV/0!	0.00119063	0.165463	probable disease resistance protein At5g66900 \\ 0.00E+00 \\ 69.42 % \\ GO:0016020-IEA;GO:0016021-IEA;GO:0043531-IEA \\ membrane-IEA;integral component of membrane-IEA;ADP binding-IEA		NB-ARC
TRINITY_DN201518_c0_g1	FvH4_4g30270.1	0	1.763	1.763	#DIV/0!	0.00300171	0.287811	uncharacterized protein Pyn_15157		Protein of unknown function DUF594
TRINITY_DN3684_c0_g1	FvH4_2g30450.1	0	1.688	1.688	#DIV/0!	0.000204985	0.0604883	hypothetical protein RchiOBHm_Chr3g0476931 \\ 0.00E+00 \\ 87.55 % \\ GO:0005536-IEA;GO:0000166-IEA;GO:0001678-IEA;GO:0001678-IBA;GO:0019660-IEA;GO:0051156-IEA;GO:0005829-IBA;GO:0016020-IEA;GO:0016021-IEA;GO:0019158-IEA;GO:0019158-IBA;GO:0016310-IEA;GO:0016773-IEA;GO:0016740-IEA;GO:0016301-IEA;GO:0006096-IEA;GO:0006096-IBA;GO:0004396-IEA;GO:0004340-IEA;GO:0004340-IBA;GO:0006013-IEA;GO:0006002-IEA;…
TRINITY_DN15001_c0_g1	FvH4_5g08860.1	0	1.653	1.653	#DIV/0!	4.64838e-08	0.00143203	reverse transcriptase \\ 0.00E+00 \\ 55.67 % \\ GO:0003964-IEA;GO:0016779-IEA;GO:0000166-IEA;GO:0090502-IEA;GO:0008270-IEA;GO:0006278-IEA;GO:0016740-IEA;GO:0004523-IEA;GO:0005524-IEA;GO:0003676-IEA;GO:0016887-IEA \\ RNA-directed DNA polymerase activity-IEA;nucleotidyltransferase activity-IEA;nucleotide binding-IEA;RNA phosphodiester bond hydrolysis, endonucleolytic-IEA;zinc ion binding-IEA;RNA-de…
TRINITY_DN1759_c3_g1	FvH4_6g25520.1	0	1.63325	1.63325	#DIV/0!	0.000528542	0.104511	---NA--- \\ 4.00E-07 \\ 88.71 %
TRINITY_DN8944_c0_g3	FvH4_5g07990.1	0	1.63025	1.63025	#DIV/0!	0.0213679	0.921998	---NA--- \\ 4.50E-170 \\ 64.61 % \\ GO:0006357-IEA \\ regulation of transcription by RNA polymerase II-IEA
TRINITY_DN2081_c0_g2	FvH4_6g25570.1	0	1.62675	1.62675	#DIV/0!	0.0032583	0.301973	putative RNA-directed DNA polymerase \\ 8.20E-25 \\ 80.61 % \\ GO:0016779-IEA;GO:0003964-IEA;GO:0090502-IEA;GO:0008270-IEA;GO:0006278-IEA;GO:0016740-IEA;GO:0004523-IEA;GO:0003676-IEA \\ nucleotidyltransferase activity-IEA;RNA-directed DNA polymerase activity-IEA;RNA phosphodiester bond hydrolysis, endonucleolytic-IEA;zinc ion binding-IEA;RNA-dependent DNA biosynthetic process-IEA;transferase acti…
TRINITY_DN13098_c0_g1	FvH4_2g20030.1	0	1.474	1.474	#DIV/0!	0.00140683	0.18287	probable glutathione S-transferase \\ 0.00E+00 \\ 86.67 %	glutathione S-transferase [EC:2.5.1.18]	Glutathione S-transferase, N-terminal
TRINITY_DN3300_c0_g1	FvH4_7g31430.1	0	1.46875	1.46875	#DIV/0!	0.000246186	0.067296	protein RKD4 \\ 8.60E-113 \\ 90.21 % \\ GO:0003677-IEA;GO:0006351-IEA;GO:0006355-IEA;GO:0005634-IEA \\ DNA binding-IEA;transcription, DNA-templated-IEA;regulation of transcription, DNA-templated-IEA;nucleus-IEA \\ GO:0003677;GO:0005634;GO:0006355 \\ DNA binding;nucleus;regulation of transcription, DNA-templated		G-patch domain
TRINITY_DN2026_c3_g1	FvH4_1g15330.1	0	1.41225	1.41225	#DIV/0!	8.50394e-05	0.0368987	probable disease resistance protein At5g66900 \\ 0.00E+00 \\ 73.65 % \\ GO:0006508-IEA;GO:0016020-IEA;GO:0016021-IEA;GO:0043531-IEA;GO:0016310-IEA;GO:0016740-IEA;GO:0004672-IEA;GO:0008234-IEA;GO:0016301-IEA;GO:0005524-IEA;GO:0006468-IEA \\ proteolysis-IEA;membrane-IEA;integral component of membrane-IEA;ADP binding-IEA;phosphorylation-IEA;transferase activity-IEA;protein kinase activity-IEA;cystei…		Protein kinase domain
TRINITY_DN1641_c1_g3	FvH4_1g08680.1	0	1.356	1.356	#DIV/0!	0.00121692	0.168115	PREDICTED: uncharacterized protein LOC101308410
TRINITY_DN7856_c0_g2	FvH4_4g31220.1	0	1.3	1.3	#DIV/0!	0.000379164	0.0873665	---NA--- \\ 0.00E+00 \\ 93.66 % \\ GO:0006098-IEA;GO:0016491-IEA;GO:0004616-IEA;GO:0050661-IEA;GO:0019521-IEA;GO:0055114-IEA \\ pentose-phosphate shunt-IEA;oxidoreductase activity-IEA;phosphogluconate dehydrogenase (decarboxylating) activity-IEA;NADP binding-IEA;D-gluconate metabolic process-IEA;oxidation-reduction process-IEA \\ GO:0004616;GO:0006098;GO:0019521;GO:0050661;GO:0055114 \\ phosphogl…
TRINITY_DN1305_c1_g2	FvH4_5g31070.1	0	1.274	1.274	#DIV/0!	0.000220022	0.0635261	putative pentatricopeptide \\ 0.00E+00 \\ 80.11 % \\ GO:0016020-IEA;GO:0016021-IEA \\ membrane-IEA;integral component of membrane-IEA \\ GO:0016021 \\ integral component of membrane		Pentatricopeptide repeat
TRINITY_DN13681_c0_g1	FvH4_1g15320.1	0	1.26	1.26	#DIV/0!	0.0123348	0.664327	U-box domain-containing protein 5-like isoform X1 \\ 4.20E-179 \\ 60.06 %		Powdery mildew resistance protein, RPW8 domain
TRINITY_DN709_c0_g1	FvH4_2g35820.1	0	1.24875	1.24875	#DIV/0!	0.0172306	0.810417	putative transcription factor C2H2 family \\ 6.10E-48 \\ 67.78 % \\ GO:0045454-IEA;GO:0005623-IEA \\ cell redox homeostasis-IEA;cell-IEA \\ GO:0005623;GO:0045454 \\ cell;cell redox homeostasis		Zinc finger, RING/FYVE/PHD-type
TRINITY_DN848_c0_g1	FvH4_3g31160.1	0	1.21375	1.21375	#DIV/0!	9.59162e-08	0.00167781	40S ribosomal protein S26-3-like \\ 0.00E+00 \\ 78.53 % \\ GO:0003677-IEA;GO:0005515-IPI;GO:0042802-IPI;GO:0045893-IEA;GO:0006355-IEA;GO:0043565-IEA;GO:0010047-IEA;GO:0005634-IEA;GO:0009834-IEA \\ DNA binding-IEA;protein binding-IPI;identical protein binding-IPI;positive regulation of transcription, DNA-templated-IEA;regulation of transcription, DNA-templated-IEA;sequence-specific DNA binding-IEA…
TRINITY_DN19068_c0_g1	FvH4_3g02700.1	0	1.21125	1.21125	#DIV/0!	0.00156772	0.196408	peroxidase 27 \\ 8.10E-104 \\ 64.24 % \\ GO:0003677-IEA;GO:0034508-IEA;GO:0051301-IEA;GO:0046982-IEA;GO:0051321-IEA;GO:0005694-IEA;GO:0009567-IEA;GO:0000786-IEA;GO:0000775-IEA;GO:0051307-IEA;GO:0005634-IEA;GO:0000785-IEA \\ DNA binding-IEA;centromere complex assembly-IEA;cell division-IEA;protein heterodimerization activity-IEA;meiotic cell cycle-IEA;chromosome-IEA;double fertilization forming a …	peroxidase [EC:1.11.1.7]	Plant peroxidase
TRINITY_DN27593_c0_g1	FvH4_4g04560.1	0	1.2055	1.2055	#DIV/0!	0.000356558	0.0840302	---NA--- \\ 2.80E-43 \\ 61.72 %
TRINITY_DN25158_c0_g1	FvH4_4g03910.1	0	1.17025	1.17025	#DIV/0!	0.00513135	0.395501	---NA---
TRINITY_DN1294_c2_g3	FvH4_3g43620.1	0	1.16325	1.16325	#DIV/0!	0.000223241	0.0641547	putative [histone H3]-lysine-36 demethylase \\ 2.80E-154 \\ 75.92 % \\ GO:0055114-IEA;GO:0004497-IEA;GO:0005576-IEA;GO:0005975-IEA;GO:0016787-IEA;GO:0030248-IEA \\ oxidation-reduction process-IEA;monooxygenase activity-IEA;extracellular region-IEA;carbohydrate metabolic process-IEA;hydrolase activity-IEA;cellulose binding-IEA \\ GO:0005576;GO:0005975;GO:0016787;GO:0030248 \\ extracellular region;…		Glutamine amidotransferase
TRINITY_DN9056_c0_g1	FvH4_1g02270.1	0	1.14925	1.14925	#DIV/0!	0.000610531	0.113423	PREDICTED: uncharacterized protein LOC101304996 \\ 0.00E+00 \\ 60.11 %
TRINITY_DN1404_c1_g3	FvH4_3g34660.1	0	1.12	1.12	#DIV/0!	0.00730777	0.484777	---NA---
TRINITY_DN12595_c0_g1	FvH4_5g18260.1	0	1.1135	1.1135	#DIV/0!	0.0294283	0.929067	beta-amyrin 28-oxidase-like \\ 0.00E+00 \\ 78.35 % \\ GO:0005506-IEA;GO:0046872-IEA;GO:0016491-IEA;GO:0016705-IEA;GO:0102557-IEA;GO:0016020-IEA;GO:0016021-IEA;GO:0020037-IEA;GO:0055114-IEA;GO:0004497-IEA \\ iron ion binding-IEA;metal ion binding-IEA;oxidoreductase activity-IEA;oxidoreductase activity, acting on paired donors, with incorporation or reduction of molecular oxygen-IEA;protopanaxadiol…	beta-amyrin 28-monooxygenase [EC:1.14.13.201]	Cytochrome P450
TRINITY_DN27263_c0_g2	FvH4_5g34580.1	0	1.08975	1.08975	#DIV/0!	0.00114443	0.161801	---NA---
TRINITY_DN3936_c0_g1	FvH4_2g18400.1	0	1.0415	1.0415	#DIV/0!	0.0140606	0.719021	BRCA1-associated protein-like \\ 2.30E-11 \\ 53.93 % \\ GO:0016020-IEA;GO:0016021-IEA \\ membrane-IEA;integral component of membrane-IEA
TRINITY_DN13787_c0_g1	FvH4_7g13720.1	0	1.0345	1.0345	#DIV/0!	0.0302903	0.929067	proliferating cell nuclear antigen-like
TRINITY_DN8879_c0_g2	FvH4_5g35110.1	0	1.018	1.018	#DIV/0!	0.00939753	0.564685	sister chromatid cohesion 1 protein 1-like \\ 3.30E-11 \\ 71.71 % \\ GO:0016757-IEA;GO:0016020-IEA;GO:0016021-IEA;GO:0006004-IEA;GO:0000228-IEA;GO:0016740-IEA;GO:0005975-IEA \\ transferase activity, transferring glycosyl groups-IEA;membrane-IEA;integral component of membrane-IEA;fucose metabolic process-IEA;nuclear chromosome-IEA;transferase activity-IEA;carbohydrate metabolic process-IEA \\ GO:0…
TRINITY_DN2502_c0_g3	FvH4_2g19390.1	0	1.00275	1.00275	#DIV/0!	3.91734e-05	0.0238501	putative RNA-directed DNA polymerase \\ 3.00E-48 \\ 67.08 % \\ GO:0016779-IEA;GO:0003964-IEA;GO:0003843-IEA;GO:0016020-IEA;GO:0016021-IEA;GO:0006075-IEA;GO:0006278-IEA;GO:0016740-IEA;GO:0000148-IEA \\ nucleotidyltransferase activity-IEA;RNA-directed DNA polymerase activity-IEA;1,3-beta-D-glucan synthase activity-IEA;membrane-IEA;integral component of membrane-IEA;(1->3)-beta-D-glucan biosynthetic…
TRINITY_DN267_c0_g2	FvH4_6g34780.1	0.00625	9.23575	9.2295	1477.72	2.25791e-06	0.00570563	PREDICTED: uncharacterized protein LOC101298623 \\ 0.00E+00 \\ 82.95 % \\ GO:0016020-IEA;GO:0016021-IEA \\ membrane-IEA;integral component of membrane-IEA \\ GO:0016021 \\ integral component of membrane		Protein of unknown function DUF594
TRINITY_DN13366_c0_g1	FvH4_2g12500.1	0.0185	15.3077	15.2892	827.446	1.5695e-07	0.00193406	somatic embryogenesis receptor kinase 2 \\ 0.00E+00 \\ 97.74 % \\ GO:0000166-IEA;GO:0007165-IEA;GO:0016020-IEA;GO:0016021-IEA;GO:0016310-IEA;GO:0005102-IEA;GO:0016740-IEA;GO:0004672-IEA;GO:0016301-IEA;GO:0004674-IEA;GO:0005524-IEA;GO:0006468-IEA \\ nucleotide binding-IEA;signal transduction-IEA;membrane-IEA;integral component of membrane-IEA;phosphorylation-IEA;signaling receptor binding-IEA;tran…	somatic embryogenesis receptor kinase 1 [EC:2.7.10.1 2.7.11.1]	Protein kinase domain
TRINITY_DN21736_c0_g1	FvH4_6g33410.1	0.01925	12.9345	12.9153	671.922	2.80707e-06	0.00631223	---NA--- \\ 1.20E-30 \\ 95.45 % \\ GO:0016491-IEA;GO:0005739-IEA;GO:0005739-IBA;GO:0046872-IEA;GO:0055114-IEA;GO:0051539-IEA;GO:0051537-IEA;GO:0051538-IEA;GO:0009060-IBA;GO:0051536-IEA;GO:0008177-IEA;GO:0006099-IEA;GO:0022904-IBA;GO:0009055-IEA;GO:0022900-IEA;GO:0005743-IEA \\ oxidoreductase activity-IEA;mitochondrion-IEA;mitochondrion-IBA;metal ion binding-IEA;oxidation-reduction process-IEA;4 i…
TRINITY_DN36999_c0_g1	FvH4_3g34220.1	0.00625	2.16725	2.161	346.76	1.15186e-06	0.00417473	---NA--- \\ 0.00E+00 \\ 81.90 % \\ GO:0042626-IEA;GO:0000166-IEA;GO:0055085-IEA;GO:0016020-IEA;GO:0016021-IEA;GO:0042908-IEA;GO:0006855-IEA;GO:0008559-IEA;GO:0005524-IEA;GO:0016787-IEA;GO:0016887-IEA \\ ATPase activity, coupled to transmembrane movement of substances-IEA;nucleotide binding-IEA;transmembrane transport-IEA;membrane-IEA;integral component of membrane-IEA;xenobiotic transport-IEA;dru…
TRINITY_DN40082_c0_g1	FvH4_5g36540.1	0.027	6.4015	6.3745	237.093	0.00781937	0.505883	(-)-isopiperitenol/(-)-carveol dehydrogenase, mitochondrial-like \\ 8.80E-97 \\ 88.84 % \\ GO:0004096-IEA;GO:0020037-IEA;GO:0055114-IEA;GO:0098869-IEA \\ catalase activity-IEA;heme binding-IEA;oxidation-reduction process-IEA;cellular oxidant detoxification-IEA \\ GO:0004096;GO:0020037;GO:0055114;GO:0098869 \\ catalase activity;heme binding;oxidation-reduction process;cellular oxidant detoxificati…		Short-chain dehydrogenase/reductase SDR
TRINITY_DN3898_c1_g1	FvH4_6g46750.1	0.03175	7.268	7.23625	228.913	9.86863e-07	0.00393691	phenolic glucoside malonyltransferase 1-like \\ 0.00E+00 \\ 76.04 % \\ GO:0016746-IEA;GO:0016747-IEA;GO:0047164-IEA;GO:0016740-IEA \\ transferase activity, transferring acyl groups-IEA;transferase activity, transferring acyl groups other than amino-acyl groups-IEA;isoflavone-7-O-beta-glucoside 6''-O-malonyltransferase activity-IEA;transferase activity-IEA \\ GO:0047164 \\ isoflavone-7-O-beta-gluc…		Transferase
TRINITY_DN740_c0_g2	FvH4_5g16920.1	0.02125	4.25575	4.2345	200.271	0.00123623	0.169717	probable glutathione S-transferase \\ 2.40E-66 \\ 72.73 % \\ GO:0046872-IEA;GO:0030001-IEA \\ metal ion binding-IEA;metal ion transport-IEA \\ GO:0030001;GO:0046872 \\ metal ion transport;metal ion binding	glutathione S-transferase [EC:2.5.1.18]	Glutathione S-transferase, N-terminal
TRINITY_DN882_c1_g2	FvH4_7g15280.1	0.0235	4.49	4.4665	191.064	2.001e-05	0.0162167	BTB/POZ domain-containing protein FBL11 isoform X1 \\ 1.60E-09 \\ 96.17 % \\ GO:0016020-IEA;GO:0016021-IEA \\ membrane-IEA;integral component of membrane-IEA \\ GO:0016021 \\ integral component of membrane
TRINITY_DN3103_c0_g2	FvH4_5g07120.1	0.011	2.0645	2.0535	187.682	0.00162244	0.199285	programmed cell death protein 4 \\ 9.80E-157 \\ 92.46 % \\ GO:0003743-IEA;GO:0006413-IEA \\ translation initiation factor activity-IEA;translational initiation-IEA \\ GO:0003743;GO:0006413 \\ translation initiation factor activity;translational initiation		Initiation factor eIF-4 gamma, MA3
TRINITY_DN423_c0_g1	FvH4_2g29330.1	0.02925	5.20325	5.174	177.889	2.63986e-06	0.00611474	---NA---
TRINITY_DN8092_c0_g1	FvH4_3g09590.1	0.26175	39.1658	38.904	149.63	0.000366109	0.0855095	protein P21-like \\ 1.50E-63 \\ 54.99 % \\ GO:0003964-IEA;GO:0016779-IEA;GO:0090502-IEA;GO:0006278-IEA;GO:0016740-IEA;GO:0004523-IEA;GO:0003676-IEA \\ RNA-directed DNA polymerase activity-IEA;nucleotidyltransferase activity-IEA;RNA phosphodiester bond hydrolysis, endonucleolytic-IEA;RNA-dependent DNA biosynthetic process-IEA;transferase activity-IEA;RNA-DNA hybrid ribonuclease activity-IEA;nuclei…		Thaumatin
TRINITY_DN28638_c0_g1	FvH4_4g34760.1	0.0305	4.53	4.4995	148.525	0.00182517	0.212582	Transmembrane protein \\ 0.00E+00 \\ 90.23 % \\ GO:0016020-IEA;GO:0006629-IEA;GO:0016021-IEA;GO:0016787-IEA \\ membrane-IEA;lipid metabolic process-IEA;integral component of membrane-IEA;hydrolase activity-IEA \\ GO:0006629;GO:0016021;GO:0016787 \\ lipid metabolic process;integral component of membrane;hydrolase activity
TRINITY_DN10673_c0_g3	FvH4_5g04830.1	0.01625	2.4095	2.39325	148.277	0.000247085	0.0674218	putative transcription factor C2H2 family \\ 7.10E-35 \\ 80.26 % \\ GO:0042626-IEA;GO:0016471-IEA;GO:1902600-IEA \\ ATPase activity, coupled to transmembrane movement of substances-IEA;vacuolar proton-transporting V-type ATPase complex-IEA;proton transmembrane transport-IEA \\ GO:0016471;GO:0042626;GO:1902600 \\ vacuolar proton-transporting V-type ATPase complex;ATPase activity, coupled to transm…		Zinc finger, RING-type
TRINITY_DN5988_c1_g1	FvH4_1g14700.1	0.029	4.13975	4.11075	142.75	0.000497447	0.100834	B3 domain-containing transcription factor VRN1-like \\ 0.00E+00 \\ 89.00 % \\ GO:0016746-IEA;GO:0090447-IBA;GO:0010143-IBA;GO:0016020-IEA;GO:0016020-IBA;GO:0016021-IEA;GO:0016791-IBA;GO:0016740-IEA;GO:0016311-IEA \\ transferase activity, transferring acyl groups-IEA;glycerol-3-phosphate 2-O-acyltransferase activity-IBA;cutin biosynthetic process-IBA;membrane-IEA;membrane-IBA;integral component of…		B3 DNA binding domain
TRINITY_DN168716_c0_g1	FvH4_4g12830.1	0.023	3.155	3.132	137.174	0.000830733	0.133851	peptidyl-prolyl cis-trans isomerase FKBP62-like \\ 0.00E+00 \\ 92.70 % \\ GO:0003755-IEA;GO:0000413-IEA;GO:0016853-IEA \\ peptidyl-prolyl cis-trans isomerase activity-IEA;protein peptidyl-prolyl isomerization-IEA;isomerase activity-IEA \\ GO:0000413;GO:0003755 \\ protein peptidyl-prolyl isomerization;peptidyl-prolyl cis-trans isomerase activity	FK506-binding protein 4/5 [EC:5.2.1.8]	FKBP-type peptidyl-prolyl cis-trans isomerase domain
TRINITY_DN5970_c2_g1	FvH4_5g25560.1	0.02925	3.648	3.61875	124.718	0.00864803	0.53587	---NA--- \\ 2.10E-15 \\ 85.01 % \\ GO:0016020-IEA;GO:0016021-IEA \\ membrane-IEA;integral component of membrane-IEA \\ GO:0016021 \\ integral component of membrane
TRINITY_DN3788_c0_g1	FvH4_7g08150.1	0.03175	3.86925	3.8375	121.866	4.00567e-05	0.024058	F-box/FBD/LRR-repeat protein At5g22700-like \\ 0.00E+00 \\ 65.82 %		FBD domain
TRINITY_DN2673_c0_g1	FvH4_1g25620.1	0.67275	77.3898	76.717	115.035	0.000879776	0.138752	putative ribosomal protein L53 \\ 3.60E-74 \\ 89.99 % \\ GO:0005840-IEA \\ ribosome-IEA \\ GO:0005840 \\ ribosome	large subunit ribosomal protein L53	Ribosomal protein L53, mitochondrial
TRINITY_DN2026_c1_g2	FvH4_1g15240.1	0.0455	4.75325	4.70775	104.467	0.0092821	0.560614	probable disease resistance protein At5g66900 \\ 0.00E+00 \\ 65.83 % \\ GO:0006508-IEA;GO:0043531-IEA;GO:0008234-IEA \\ proteolysis-IEA;ADP binding-IEA;cysteine-type peptidase activity-IEA		NB-ARC
TRINITY_DN10075_c0_g2	FvH4_6g01060.1	0.20075	20.8628	20.662	103.924	2.73364e-05	0.0194142	subtilisin-like protease SBT1.9 \\ 0.00E+00 \\ 83.85 % \\ GO:0008233-IEA;GO:0006508-IEA;GO:0004252-IEA;GO:0008236-IEA;GO:0016787-IEA \\ peptidase activity-IEA;proteolysis-IEA;serine-type endopeptidase activity-IEA;serine-type peptidase activity-IEA;hydrolase activity-IEA \\ GO:0004252;GO:0006508 \\ serine-type endopeptidase activity;proteolysis		Peptidase S8/S53 domain
TRINITY_DN27783_c0_g1	FvH4_2g25460.1	0.541	54.9225	54.3815	101.52	7.55311e-05	0.0346263	hypothetical protein RchiOBHm_Chr1g0333271 \\ 4.80E-160 \\ 82.25 % \\ GO:0008270-IEA;GO:0015074-IEA;GO:0000943-IEA;GO:0003676-IEA \\ zinc ion binding-IEA;DNA integration-IEA;retrotransposon nucleocapsid-IEA;nucleic acid binding-IEA \\ GO:0000943;GO:0003676;GO:0008270;GO:0015074 \\ retrotransposon nucleocapsid;nucleic acid binding;zinc ion binding;DNA integration
TRINITY_DN9997_c1_g1	FvH4_6g13830.1	0.01375	1.32375	1.31	96.2727	0.0037165	0.32666	---NA---
TRINITY_DN84_c1_g2	FvH4_3g00860.1	0.0415	3.39325	3.35175	81.7651	0.00129772	0.174581	putative DnaJ domain-containing protein \\ 2.70E-08 \\ 66.04 % \\ GO:0016020-IEA;GO:0016021-IEA \\ membrane-IEA;integral component of membrane-IEA		Domain of unknown function DUF3444
TRINITY_DN4912_c0_g1	FvH4_7g12650.1	0.0375	2.957	2.9195	78.8533	3.68286e-06	0.00725061	putative galactose oxidase, beta-propeller \\ 0.00E+00 \\ 51.11 %		Kelch-type beta propeller
TRINITY_DN4837_c0_g1	FvH4_2g00840.1	0.21775	16.554	16.3363	76.023	8.67585e-05	0.0372252	putative transcription factor interactor and regulator CCHC(Zn) family \\ 7.10E-08 \\ 83.70 % \\ GO:0000502-IEA \\ proteasome complex-IEA \\ GO:0000502 \\ proteasome complex
TRINITY_DN17066_c0_g2	FvH4_2g26650.1	0.0205	1.50875	1.48825	73.5976	3.82511e-06	0.00733879	beta-amyrin 28-oxidase-like \\ 0.00E+00 \\ 84.66 % \\ GO:0005506-IEA;GO:0016491-IEA;GO:0016705-IEA;GO:0046872-IEA;GO:0102557-IEA;GO:0016020-IEA;GO:0016021-IEA;GO:0020037-IEA;GO:0055114-IEA;GO:0004497-IEA \\ iron ion binding-IEA;oxidoreductase activity-IEA;oxidoreductase activity, acting on paired donors, with incorporation or reduction of molecular oxygen-IEA;metal ion binding-IEA;protopanaxadiol…		Cytochrome P450
TRINITY_DN14776_c1_g1	FvH4_7g01860.1	0.03825	2.7605	2.72225	72.1699	0.000330631	0.0802661	stromal processing peptidase, chloroplastic
TRINITY_DN1510_c0_g1	FvH4_5g06220.1	9.92825	690.762	680.834	69.5754	0.00179934	0.210769	thaumatin-like protein 1b \\ 2.90E-17 \\ 55.96 % \\ GO:0016020-IEA;GO:0016021-IEA \\ membrane-IEA;integral component of membrane-IEA		Thaumatin
TRINITY_DN256_c0_g1	FvH4_3g14170.1	0.2565	17.4417	17.1852	67.999	7.39479e-07	0.00361605	---NA--- \\ 2.10E-95 \\ 78.29 % \\ GO:0043531-IEA;GO:0016787-IEA \\ ADP binding-IEA;hydrolase activity-IEA \\ GO:0016787;GO:0043531 \\ hydrolase activity;ADP binding
TRINITY_DN2403_c0_g1	FvH4_2g36830.1	0.027	1.79275	1.76575	66.3981	3.74995e-05	0.0232751	disease resistance protein At4g27190-like isoform X1 \\ 0.00E+00 \\ 84.30 % \\ GO:0043531-IEA;GO:0016787-IEA \\ ADP binding-IEA;hydrolase activity-IEA \\ GO:0016787;GO:0043531 \\ hydrolase activity;ADP binding		NB-ARC
TRINITY_DN9282_c0_g1	FvH4_2g27300.1	0.0515	3.2285	3.177	62.6893	0.000173111	0.0555511	putative ribonuclease H-like domain, reverse transcriptase zinc-binding domain-containing protein \\ 2.90E-55 \\ 53.74 % \\ GO:0003964-IEA;GO:0090502-IEA;GO:0006278-IEA;GO:0004523-IEA;GO:0003676-IEA \\ RNA-directed DNA polymerase activity-IEA;RNA phosphodiester bond hydrolysis, endonucleolytic-IEA;RNA-dependent DNA biosynthetic process-IEA;RNA-DNA hybrid ribonuclease activity-IEA;nucleic acid bin…
TRINITY_DN7543_c0_g1	FvH4_5g01640.1	0.18925	11.8187	11.6295	62.4505	0.00122989	0.169238	cytochrome P450 87A3 \\ 1.00E-62 \\ 78.89 % \\ GO:0016020-IEA;GO:0016021-IEA;GO:0009535-IBA \\ membrane-IEA;integral component of membrane-IEA;chloroplast thylakoid membrane-IBA \\ GO:0009535;GO:0016021 \\ chloroplast thylakoid membrane;integral component of membrane		Cytochrome P450
TRINITY_DN5644_c0_g1	FvH4_2g16960.1	0.166	9.05375	8.88775	54.5407	0.00284094	0.279013	actin cytoskeleton-regulatory complex protein pan1-like \\ 0.00E+00 \\ 78.03 % \\ GO:0000166-IEA;GO:0016779-IEA;GO:0003723-IEA;GO:0046872-IEA;GO:0043631-IEA;GO:0031123-IEA;GO:0016740-IEA;GO:0004652-IEA;GO:0005634-IEA;GO:0005524-IEA \\ nucleotide binding-IEA;nucleotidyltransferase activity-IEA;RNA binding-IEA;metal ion binding-IEA;RNA polyadenylation-IEA;RNA 3'-end processing-IEA;transferase activ…
TRINITY_DN46_c0_g2	FvH4_7g13280.1	0.063	3.326	3.263	52.7937	0.00022318	0.0641547	cyclic nucleotide-gated ion channel 1-like \\ 0.00E+00 \\ 66.22 % \\ GO:0055085-IEA;GO:0016020-IEA;GO:0016021-IEA;GO:0034220-IEA;GO:0016310-IEA;GO:0016301-IEA;GO:0006811-IEA;GO:0005216-IEA \\ transmembrane transport-IEA;membrane-IEA;integral component of membrane-IEA;ion transmembrane transport-IEA;phosphorylation-IEA;kinase activity-IEA;ion transport-IEA;ion channel activity-IEA	cyclic nucleotide gated channel, plant	Cyclic nucleotide-binding domain
TRINITY_DN38760_c0_g1	FvH4_6g34770.1	0.044	2.26175	2.21775	51.4034	7.90629e-07	0.00372633	probable disease resistance RPP8-like protein 2 \\ 0.00E+00 \\ 67.69 % \\ GO:0016020-IEA;GO:0016021-IEA;GO:0043531-IEA \\ membrane-IEA;integral component of membrane-IEA;ADP binding-IEA		NB-ARC
TRINITY_DN2892_c0_g2	FvH4_1g02310.1	0.19	9.30775	9.11775	48.9882	0.0418932	0.929067	putative transcription factor interactor and regulator CCHC(Zn) family \\ 2.40E-59 \\ 63.58 % \\ GO:0008168-IEA;GO:0016740-IEA;GO:0031167-IEA;GO:0052913-IEA;GO:0032259-IEA \\ methyltransferase activity-IEA;transferase activity-IEA;rRNA methylation-IEA;16S rRNA (guanine(966)-N(2))-methyltransferase activity-IEA;methylation-IEA
TRINITY_DN7361_c0_g1	FvH4_5g18990.1	0.177	7.7405	7.5635	43.7316	0.000850849	0.136238	probable disease resistance protein At4g27220 isoform X1 \\ 7.50E-89 \\ 88.22 % \\ GO:0009055-IEA;GO:0022900-IEA \\ electron transfer activity-IEA;electron transport chain-IEA \\ GO:0009055;GO:0022900 \\ electron transfer activity;electron transport chain
TRINITY_DN204_c1_g1	FvH4_3g44920.1	0.042	1.747	1.705	41.5952	0.00089928	0.140309	receptor-like protein 2 \\ 0.00E+00 \\ 80.54 % \\ GO:0016020-IEA;GO:0016021-IEA;GO:0016310-IEA;GO:0016740-IEA;GO:0016301-IEA;GO:0004674-IEA;GO:0006468-IEA \\ membrane-IEA;integral component of membrane-IEA;phosphorylation-IEA;transferase activity-IEA;kinase activity-IEA;protein serine/threonine kinase activity-IEA;protein phosphorylation-IEA \\ GO:0004674;GO:0006468;GO:0016021 \\ protein serine/t…		Leucine-rich repeat
TRINITY_DN12874_c0_g2	FvH4_7g02980.1	0.08425	3.4995	3.41525	41.5371	7.46398e-06	0.00974334	protein NRT1/ PTR FAMILY 5.4-like \\ 0.00E+00 \\ 76.20 % \\ GO:0055085-IEA;GO:0006857-IEA;GO:0016020-IEA;GO:0016021-IEA;GO:0022857-IEA;GO:0005215-IEA \\ transmembrane transport-IEA;oligopeptide transport-IEA;membrane-IEA;integral component of membrane-IEA;transmembrane transporter activity-IEA;transporter activity-IEA \\ GO:0006857;GO:0016021;GO:0022857;GO:0055085 \\ oligopeptide transport;integr…		Proton-dependent oligopeptide transporter family
TRINITY_DN2004_c0_g1	FvH4_6g15920.1	0.198	7.721	7.523	38.9949	4.10323e-05	0.0244503	wall-associated receptor kinase-like 3 \\ 0.00E+00 \\ 79.94 % \\ GO:0016020-IEA;GO:0016021-IEA;GO:0005509-IEA;GO:0004672-IEA;GO:0016740-IEA;GO:0030247-IEA;GO:0004674-IEA;GO:0005524-IEA;GO:0006468-IEA \\ membrane-IEA;integral component of membrane-IEA;calcium ion binding-IEA;protein kinase activity-IEA;transferase activity-IEA;polysaccharide binding-IEA;protein serine/threonine kinase activity-IEA…		Protein kinase domain
TRINITY_DN7843_c0_g3	FvH4_4g22740.1	0.05975	2.27825	2.2185	38.1297	0.000288524	0.0735808	putative laccase \\ 0.00E+00 \\ 84.45 % \\ GO:0046274-IEA;GO:0048046-IEA;GO:0016491-IEA;GO:0046872-IEA;GO:0005507-IEA;GO:0055114-IEA;GO:0052716-IEA;GO:0005576-IEA \\ lignin catabolic process-IEA;apoplast-IEA;oxidoreductase activity-IEA;metal ion binding-IEA;copper ion binding-IEA;oxidation-reduction process-IEA;hydroquinone:oxygen oxidoreductase activity-IEA;extracellular region-IEA \\ GO:0005507…	laccase [EC:1.10.3.2]	Multicopper oxidase, type 1
TRINITY_DN1031_c0_g1	FvH4_4g11170.1	0.04375	1.61275	1.569	36.8629	3.07889e-05	0.0208924	proline synthase co-transcribed bacterial homolog protein-like \\ 0.00E+00 \\ 63.87 %
TRINITY_DN420_c0_g1	FvH4_7g20670.1	0.0305	1.0855	1.055	35.5902	0.000194047	0.0590129	cyclic nucleotide-gated ion channel 1-like \\ 0.00E+00 \\ 69.85 % \\ GO:0055085-IEA;GO:0016020-IEA;GO:0034220-IEA;GO:0016021-IEA;GO:0004672-IEA;GO:0006811-IEA;GO:0005524-IEA;GO:0005216-IEA;GO:0006468-IEA \\ transmembrane transport-IEA;membrane-IEA;ion transmembrane transport-IEA;integral component of membrane-IEA;protein kinase activity-IEA;ion transport-IEA;ATP binding-IEA;ion channel activity-I…		Cyclic nucleotide-binding domain
TRINITY_DN9219_c0_g1	FvH4_6g49870.1	0.1195	3.73125	3.61175	31.2238	1.36558e-05	0.0132261	putative transcription factor interactor and regulator CCHC(Zn) family \\ 0.00E+00 \\ 47.59 % \\ GO:0016020-IEA;GO:0016021-IEA \\ membrane-IEA;integral component of membrane-IEA		Zinc finger, CCHC-type superfamily
TRINITY_DN4032_c0_g1	FvH4_3g43720.1	0.53675	16.0023	15.4655	29.8132	9.73251e-06	0.0108242	putative ribosomal protein L4/L1e \\ 9.70E-90 \\ 69.35 % \\ GO:0003735-IEA;GO:0005840-IEA;GO:0006412-IEA \\ structural constituent of ribosome-IEA;ribosome-IEA;translation-IEA \\ GO:0003735;GO:0005840;GO:0006412 \\ structural constituent of ribosome;ribosome;translation	large subunit ribosomal protein L4	Ribosomal protein L4/L1e
TRINITY_DN6627_c0_g1	FvH4_4g10410.1	0.29425	8.04725	7.753	27.3483	5.62139e-06	0.00872922	pentatricopeptide repeat-containing protein At4g19440, chloroplastic \\ 0.00E+00 \\ 78.32 % \\ GO:0005739-IBA \\ mitochondrion-IBA \\ GO:0005739 \\ mitochondrion		Pentatricopeptide repeat
TRINITY_DN2630_c2_g2	FvH4_6g32690.1	0.1565	4.2055	4.049	26.8722	4.3996e-05	0.0254394	probable LRR receptor-like serine/threonine-protein kinase At1g05700 \\ 0.00E+00 \\ 75.72 % \\ GO:0016020-IEA;GO:0016021-IEA;GO:0004672-IEA;GO:0005524-IEA;GO:0006468-IEA \\ membrane-IEA;integral component of membrane-IEA;protein kinase activity-IEA;ATP binding-IEA;protein phosphorylation-IEA \\ GO:0016020 \\ membrane		Protein kinase domain
TRINITY_DN18670_c0_g1	FvH4_2g26620.1	0.059	1.555	1.496	26.3559	0.00286596	0.27998	peroxidase 3-like \\ 0.00E+00 \\ 73.92 % \\ GO:0000166-IEA;GO:0000165-IEA;GO:0000186-IEA;GO:0004709-IEA;GO:0016310-IEA;GO:0004672-IEA;GO:0016740-IEA;GO:0016301-IEA;GO:0004674-IEA;GO:0005524-IEA;GO:0006468-IEA;GO:0005622-IEA \\ nucleotide binding-IEA;MAPK cascade-IEA;activation of MAPKK activity-IEA;MAP kinase kinase kinase activity-IEA;phosphorylation-IEA;protein kinase activity-IEA;transferase a…	peroxidase [EC:1.11.1.7]	Plant peroxidase
TRINITY_DN9101_c0_g1	FvH4_1g29540.1	0.2025	5.26775	5.06525	26.0136	0.00032934	0.0801329	---NA--- \\ 0.00E+00 \\ 89.55 % \\ GO:0005506-IEA;GO:0016705-IEA;GO:0046872-IEA;GO:0033772-IEA;GO:0016491-IEA;GO:0016020-IEA;GO:0016021-IEA;GO:0020037-IEA;GO:0055114-IEA;GO:0004497-IEA;GO:0016711-IEA \\ iron ion binding-IEA;oxidoreductase activity, acting on paired donors, with incorporation or reduction of molecular oxygen-IEA;metal ion binding-IEA;flavonoid 3',5'-hydroxylase activity-IEA;oxidor…
TRINITY_DN8479_c0_g1	FvH4_7g23480.1	0.05375	1.381	1.32725	25.693	0.000445229	0.0953836	PREDICTED: uncharacterized protein LOC101306567 \\ 0.00E+00 \\ 64.34 % \\ GO:0016020-IEA;GO:0016021-IEA \\ membrane-IEA;integral component of membrane-IEA \\ GO:0016020 \\ membrane		Protein of unknown function DUF668
TRINITY_DN7532_c0_g1	FvH4_2g27280.1	0.218	5.5905	5.3725	25.6445	5.39726e-07	0.00319757	PREDICTED: uncharacterized protein LOC105349807
TRINITY_DN4766_c0_g1	FvH4_7g04490.1	0.5445	12.7762	12.2317	23.4642	2.10028e-06	0.0055959	PREDICTED: uncharacterized protein LOC101300478 \\ 0.00E+00 \\ 67.23 %
TRINITY_DN8746_c0_g1	FvH4_3g13110.1	0.64275	14.845	14.2022	23.0961	0.000278959	0.0719705	putative transcription factor interactor and regulator CCHC(Zn) family \\ 0.00E+00 \\ 76.40 %
TRINITY_DN11942_c0_g1	FvH4_6g41220.1	0.1375	3.041	2.9035	22.1164	2.48101e-05	0.0184175	DNA topoisomerase 1 beta \\ 4.10E-106 \\ 77.31 % \\ GO:0003677-IEA;GO:0005694-IEA;GO:0003917-IEA;GO:0006265-IEA;GO:0016853-IEA \\ DNA binding-IEA;chromosome-IEA;DNA topoisomerase type I activity-IEA;DNA topological change-IEA;isomerase activity-IEA \\ GO:0003677;GO:0003917;GO:0005694;GO:0006265 \\ DNA binding;DNA topoisomerase type I activity;chromosome;DNA topological change	DNA topoisomerase I [EC:5.99.1.2]	DNA topoisomerase I
TRINITY_DN4469_c0_g1	FvH4_3g32580.1	0.048	1.0445	0.9965	21.7604	1.55991e-05	0.0141342	putative RNA-directed DNA polymerase \\ 0.00E+00 \\ 71.61 % \\ GO:0003964-IEA;GO:0048544-IEA;GO:0006508-IEA;GO:0016020-IEA;GO:0016021-IEA;GO:0016740-IEA;GO:0016779-IEA;GO:0008270-IEA;GO:0008233-IEA;GO:0006278-IEA;GO:0015074-IEA;GO:0000943-IEA;GO:0004672-IEA;GO:0005524-IEA;GO:0003676-IEA;GO:0006468-IEA \\ RNA-directed DNA polymerase activity-IEA;recognition of pollen-IEA;proteolysis-IEA;membrane-I…
TRINITY_DN1874_c0_g1	FvH4_1g13960.1	3.7715	81.6778	77.9062	21.6566	8.47071e-07	0.00378199	probable caffeoyl-CoA O-methyltransferase At4g26220 \\ 2.60E-122 \\ 66.14 % \\ GO:0010097-IEA;GO:0007275-IEA;GO:0010094-IEA;GO:0008285-IEA;GO:0048437-IEA;GO:0005634-IEA;GO:0003676-IEA \\ specification of stamen identity-IEA;multicellular organism development-IEA;specification of carpel identity-IEA;negative regulation of cell proliferation-IEA;floral organ development-IEA;nucleus-IEA;nucleic acid…	caffeoyl-CoA O-methyltransferase [EC:2.1.1.104]	O-methyltransferase, family 3
TRINITY_DN5960_c0_g2	FvH4_1g04610.1	0.10075	2.10575	2.005	20.9007	6.05003e-05	0.0305046	UPF0481 protein At3g47200-like \\ 0.00E+00 \\ 67.56 % \\ GO:0016020-IEA;GO:0016021-IEA \\ membrane-IEA;integral component of membrane-IEA \\ GO:0016021 \\ integral component of membrane		Protein of unknown function DUF247, plant
TRINITY_DN3471_c0_g1	FvH4_1g03650.1	18.6163	375.05	356.434	20.1464	8.41904e-07	0.00378199	pentatricopeptide repeat-containing protein At1g08070, chloroplastic \\ 9.10E-129 \\ 82.25 % \\ GO:0008270-IEA \\ zinc ion binding-IEA \\ GO:0008270 \\ zinc ion binding		Protein of unknown function DUF1677, Oryza sativa
TRINITY_DN3795_c0_g1	FvH4_5g24580.1	0.0565	1.068	1.0115	18.9027	0.00557935	0.413181	putative ribosomal protein L35A \\ 4.80E-13 \\ 46.59 % \\ GO:0003735-IEA;GO:0005840-IEA;GO:0006412-IEA;GO:0005622-IEA \\ structural constituent of ribosome-IEA;ribosome-IEA;translation-IEA;intracellular-IEA
TRINITY_DN14576_c0_g1	FvH4_5g16140.1	0.82775	15.4992	14.6715	18.7246	7.59196e-06	0.00974922	---NA---
TRINITY_DN1220_c1_g1	FvH4_7g27170.1	0.15875	2.96225	2.8035	18.6598	0.000243557	0.0670532	probable LRR receptor-like serine/threonine-protein kinase At3g47570 \\ 0.00E+00 \\ 82.55 % \\ GO:0000166-IEA;GO:0016020-IEA;GO:0016021-IEA;GO:0016310-IEA;GO:0004672-IEA;GO:0016740-IEA;GO:0016301-IEA;GO:0004674-IEA;GO:0005524-IEA;GO:0006468-IEA \\ nucleotide binding-IEA;membrane-IEA;integral component of membrane-IEA;phosphorylation-IEA;protein kinase activity-IEA;transferase activity-IEA;kinase …		Protein kinase domain
TRINITY_DN911_c0_g2	FvH4_4g05320.1	0.06425	1.174	1.10975	18.2724	0.0132254	0.693389	probable glutathione S-transferase \\ 1.50E-30 \\ 89.19 %	glutathione S-transferase [EC:2.5.1.18]	Glutathione S-transferase, N-terminal
TRINITY_DN1010_c1_g3	FvH4_5g06580.1	0.12825	2.18225	2.054	17.0156	0.00422334	0.351818	cytochrome P450 71A26-like		Cytochrome P450
TRINITY_DN112669_c0_g1	FvH4_2g20570.1	0.09325	1.55475	1.4615	16.6729	0.0088085	0.542293	---NA---
TRINITY_DN2631_c0_g1	FvH4_1g14980.1	0.1555	2.51	2.3545	16.1415	0.00192937	0.219008	L-ascorbate oxidase homolog \\ 0.00E+00 \\ 88.68 % \\ GO:0016491-IEA;GO:0005507-IEA;GO:0016020-IEA;GO:0016021-IEA;GO:0055114-IEA;GO:0009506-IBA;GO:0009505-IBA;GO:0008447-IEA;GO:0016722-IBA \\ oxidoreductase activity-IEA;copper ion binding-IEA;membrane-IEA;integral component of membrane-IEA;oxidation-reduction process-IEA;plasmodesma-IBA;plant-type cell wall-IBA;L-ascorbate oxidase activity-IEA;ox…		Multicopper oxidase, type 1
TRINITY_DN6305_c0_g1	FvH4_4g00960.1	3.4185	52.9813	49.5628	15.4984	0.000186632	0.0578427	PREDICTED: uncharacterized protein LOC101302446 isoform X2 \\ 0.00E+00 \\ 80.88 % \\ GO:0003676-IEA \\ nucleic acid binding-IEA \\ GO:0003676 \\ nucleic acid binding
TRINITY_DN2049_c1_g1	FvH4_2g27640.1	1.77075	27.3593	25.5885	15.4507	0.000381918	0.0879352	chloroplast processing peptidase-like	signal peptidase I [EC:3.4.21.89]	Peptidase S26A, signal peptidase I
TRINITY_DN37576_c0_g1	FvH4_2g30010.1	0.10075	1.527	1.42625	15.1563	0.0111341	0.623814	gibberellin 3-beta-dioxygenase 1-like	gibberellin 3-beta-dioxygenase [EC:1.14.11.15]	Oxoglutarate/iron-dependent dioxygenase
TRINITY_DN11937_c0_g1	FvH4_3g26850.1	0.167	2.52125	2.35425	15.0973	0.00389836	0.335942	probable peroxidase 26 \\ 3.10E-126 \\ 59.13 %	peroxidase [EC:1.11.1.7]	Plant peroxidase
TRINITY_DN2845_c0_g1	FvH4_7g33080.1	2.0675	30.5745	28.507	14.7881	0.00090853	0.140719	uncharacterized calcium-binding protein At1g02270 \\ 0.00E+00 \\ 73.07 % \\ GO:0005509-IEA \\ calcium ion binding-IEA		Endonuclease/exonuclease/phosphatase
TRINITY_DN1533_c0_g1	FvH4_1g21700.1	0.20425	2.962	2.75775	14.5018	0.00378496	0.330134	LRR receptor-like serine/threonine-protein kinase FEI 1 \\ 1.30E-08 \\ 75.45 % \\ GO:0003677-IEA;GO:0000166-IEA;GO:0000165-IEA;GO:0004714-IEA;GO:0000186-IEA;GO:0016020-IEA;GO:0016021-IEA;GO:0004709-IEA;GO:0016310-IEA;GO:0016740-IEA;GO:0016301-IEA;GO:0018108-IEA;GO:0006355-IEA;GO:0004672-IEA;GO:0004674-IEA;GO:0005524-IEA;GO:0006468-IEA;GO:0005622-IEA \\ DNA binding-IEA;nucleotide binding-IEA;MAPK …
TRINITY_DN9803_c0_g1	FvH4_3g10690.1	0.07475	1.06525	0.9905	14.2508	0.000178342	0.0564665	putative wall-associated receptor kinase-like 16 \\ 0.00E+00 \\ 73.34 % \\ GO:0016020-IEA;GO:0016021-IEA;GO:0005509-IEA;GO:0016310-IEA;GO:0004672-IEA;GO:0016740-IEA;GO:0030247-IEA;GO:0016301-IEA;GO:0005524-IEA;GO:0006468-IEA \\ membrane-IEA;integral component of membrane-IEA;calcium ion binding-IEA;phosphorylation-IEA;protein kinase activity-IEA;transferase activity-IEA;polysaccharide binding-IEA…		EGF-type aspartate/asparagine hydroxylation site
TRINITY_DN291831_c0_g1	FvH4_2g37070.1	0.161	2.2775	2.1165	14.146	0.00226843	0.2429	putative F-box domain, FBD domain, leucine-rich repeat domain, L domain-containing protein \\ 0.00E+00 \\ 93.43 % \\ GO:0016020-IEA;GO:0016021-IEA;GO:0016740-IEA;GO:0004672-IEA;GO:0005524-IEA;GO:0006468-IEA \\ membrane-IEA;integral component of membrane-IEA;transferase activity-IEA;protein kinase activity-IEA;ATP binding-IEA;protein phosphorylation-IEA \\ GO:0004672;GO:0005524;GO:0006468;GO:00160…		F-box domain
TRINITY_DN13698_c0_g1	FvH4_7g29950.1	0.18175	2.545	2.36325	14.0028	7.3726e-08	0.00167551	putative transporter arsB \\ 0.00E+00 \\ 88.90 % \\ GO:0055085-IEA;GO:0016020-IEA;GO:0016021-IEA \\ transmembrane transport-IEA;membrane-IEA;integral component of membrane-IEA \\ GO:0016021;GO:0055085 \\ integral component of membrane;transmembrane transport		Citrate transporter-like domain
TRINITY_DN2773_c0_g1	FvH4_6g41660.1	1.324	18.453	17.129	13.9373	0.00525631	0.400713	glycine-rich cell wall structural protein-like \\ 9.90E-06 \\ 61.82 %		Glycine rich protein
TRINITY_DN441_c1_g1	FvH4_3g20790.1	0.23725	3.298	3.06075	13.9009	0.0096447	0.573267	Root cap \\ 0.00E+00 \\ 89.07 %		Root cap
TRINITY_DN17733_c0_g1	FvH4_1g06330.1	1.64725	21.9895	20.3422	13.3492	2.18681e-05	0.017074	putative SUF system FeS cluster assembly, SufBD \\ 6.30E-04 \\ 84.85 %
TRINITY_DN2164_c0_g1	FvH4_7g15020.1	0.85725	11.335	10.4778	13.2225	5.01544e-07	0.00311128	putative UDP-rhamnose:rhamnosyltransferase 1 \\ 0.00E+00 \\ 80.96 % \\ GO:0016757-IEA;GO:0016758-IEA;GO:0016740-IEA;GO:0102241-IEA \\ transferase activity, transferring glycosyl groups-IEA;transferase activity, transferring hexosyl groups-IEA;transferase activity-IEA;soyasaponin III rhamnosyltransferase activity-IEA \\ GO:0102241 \\ soyasaponin III rhamnosyltransferase activity		UDP-glucuronosyl/UDP-glucosyltransferase
TRINITY_DN3688_c0_g1	FvH4_6g24680.1	47.017	617.125	570.108	13.1256	0.0032529	0.301821	glucan endo-1,3-beta-glucosidase, basic isoform-like \\ 0.00E+00 \\ 82.93 % \\ GO:0008152-IEA;GO:0042973-IEA;GO:0004553-IEA;GO:0016787-IEA;GO:0005975-IEA;GO:0016798-IEA \\ metabolic process-IEA;glucan endo-1,3-beta-D-glucosidase activity-IEA;hydrolase activity, hydrolyzing O-glycosyl compounds-IEA;hydrolase activity-IEA;carbohydrate metabolic process-IEA;hydrolase activity, acting on glycosyl bon…		Glycoside hydrolase family 17
TRINITY_DN10487_c0_g4	FvH4_7g15700.1	0.195	2.475	2.28	12.6923	4.53666e-05	0.0260748	BON1-associated protein 2 \\ 0.00E+00 \\ 91.14 % \\ GO:0004427-IEA;GO:0016791-IEA;GO:0016311-IEA;GO:0016787-IEA \\ inorganic diphosphatase activity-IEA;phosphatase activity-IEA;dephosphorylation-IEA;hydrolase activity-IEA \\ GO:0004427;GO:0016311;GO:0016791 \\ inorganic diphosphatase activity;dephosphorylation;phosphatase activity		C2 domain
TRINITY_DN2231_c0_g1	FvH4_2g29310.1	0.28125	3.36975	3.0885	11.9813	1.70705e-08	0.000751272	UPF0481 protein At3g47200-like \\ 1.80E-138 \\ 59.44 % \\ GO:0016020-IEA;GO:0016021-IEA \\ membrane-IEA;integral component of membrane-IEA		Protein of unknown function DUF247, plant
TRINITY_DN4968_c1_g1	FvH4_5g37000.1	0.529	6.1825	5.6535	11.6871	0.000176531	0.0561525	7-deoxyloganetin glucosyltransferase-like \\ 0.00E+00 \\ 79.50 % \\ GO:0016757-IEA;GO:0016758-IEA;GO:0016740-IEA \\ transferase activity, transferring glycosyl groups-IEA;transferase activity, transferring hexosyl groups-IEA;transferase activity-IEA \\ GO:0016758 \\ transferase activity, transferring hexosyl groups	7-deoxyloganetin glucosyltransferase [EC:2.4.1.324]	UDP-glucuronosyl/UDP-glucosyltransferase
TRINITY_DN1386_c0_g1	FvH4_7g12550.1	1.19725	13.921	12.7237	11.6275	7.2686e-06	0.00969367	beta-amyrin 28-oxidase-like \\ 0.00E+00 \\ 79.59 % \\ GO:0005506-IEA;GO:0046872-IEA;GO:0016491-IEA;GO:0016705-IEA;GO:0102557-IEA;GO:0016020-IEA;GO:0016021-IEA;GO:0020037-IEA;GO:0055114-IEA;GO:0004497-IEA \\ iron ion binding-IEA;metal ion binding-IEA;oxidoreductase activity-IEA;oxidoreductase activity, acting on paired donors, with incorporation or reduction of molecular oxygen-IEA;protopanaxadiol…	beta-amyrin 28-monooxygenase [EC:1.14.13.201]	Cytochrome P450
TRINITY_DN10352_c0_g1	FvH4_5g21260.1	0.24825	2.83325	2.585	11.4129	0.000188085	0.058176	ribonuclease H \\ 4.10E-54 \\ 49.10 % \\ GO:0003964-IEA;GO:0090502-IEA;GO:0006278-IEA;GO:0004523-IEA;GO:0003676-IEA \\ RNA-directed DNA polymerase activity-IEA;RNA phosphodiester bond hydrolysis, endonucleolytic-IEA;RNA-dependent DNA biosynthetic process-IEA;RNA-DNA hybrid ribonuclease activity-IEA;nucleic acid binding-IEA
TRINITY_DN4267_c0_g1	FvH4_6g02030.1	0.69375	7.3815	6.68775	10.64	1.15242e-05	0.0117948	KRR1 small subunit processome component homolog \\ 5.90E-09 \\ 89.31 % \\ GO:0009570-IBA;GO:0009507-IBA;GO:0009535-IBA \\ chloroplast stroma-IBA;chloroplast-IBA;chloroplast thylakoid membrane-IBA \\ GO:0009535;GO:0009570 \\ chloroplast thylakoid membrane;chloroplast stroma		Ribosomal RNA assembly KRR1
TRINITY_DN830_c0_g1	FvH4_4g01920.1	1.1875	12.462	11.2745	10.4943	5.04964e-07	0.00311128	enhancer of mRNA-decapping protein 4 \\ 1.10E-175 \\ 73.28 %
TRINITY_DN158_c0_g1	FvH4_1g16640.1	0.36775	3.74425	3.3765	10.1815	0.000235443	0.0658676	putative leucine-rich repeat domain, L domain-containing protein \\ 0.00E+00 \\ 75.76 % \\ GO:0007165-IEA;GO:0043531-IEA;GO:0016787-IEA \\ signal transduction-IEA;ADP binding-IEA;hydrolase activity-IEA \\ GO:0007165;GO:0016787;GO:0043531 \\ signal transduction;hydrolase activity;ADP binding		Toll/interleukin-1 receptor homology (TIR) domain
TRINITY_DN1552_c0_g1	FvH4_7g32640.1	0.60225	6.06175	5.4595	10.0652	2.45358e-06	0.00590528	F-box/LRR-repeat protein At4g14103-like \\ 3.50E-24 \\ 51.36 %		Zinc finger, CCHC-type superfamily
TRINITY_DN1636_c0_g1	FvH4_1g16010.1	0.20775	2.04875	1.841	9.86161	4.74238e-05	0.0268071	RAD51 recombinase \\ 2.20E-109 \\ 69.37 % \\ GO:0003677-IEA;GO:0000166-IEA;GO:0000150-IEA;GO:1990426-IEA;GO:0016787-IEA;GO:0006281-IEA;GO:0008094-IEA;GO:0003690-IEA;GO:0000724-IEA;GO:0006310-IEA;GO:0003697-IEA;GO:0005634-IEA;GO:0005524-IEA;GO:0006974-IEA;GO:0006259-IEA \\ DNA binding-IEA;nucleotide binding-IEA;recombinase activity-IEA;mitotic recombination-dependent replication fork processing-IE…
TRINITY_DN1560_c0_g1	FvH4_1g07190.1	0.69575	6.859	6.16325	9.85843	0.0237685	0.929067	1-aminocyclopropane-1-carboxylate oxidase 1 \\ 7.80E-102 \\ 71.31 %	aminocyclopropanecarboxylate oxidase [EC:1.14.17.4]	Oxoglutarate/iron-dependent dioxygenase
TRINITY_DN16154_c0_g1	FvH4_7g19420.1	0.173	1.686	1.513	9.74566	0.0307011	0.929067	PREDICTED: uncharacterized protein LOC105353003
TRINITY_DN4045_c0_g1	FvH4_2g36850.1	0.13125	1.2595	1.12825	9.59619	0.000459968	0.0969014	disease resistance protein At4g27190-like isoform X1 \\ 0.00E+00 \\ 73.06 %		NB-ARC
TRINITY_DN239762_c0_g1	FvH4_3g18710.1	0.268	2.557	2.289	9.54104	0.00149352	0.18997	CLAVATA3/ESR (CLE)-related protein 4-like \\ 3.40E-78 \\ 77.01 % \\ GO:0055114-IEA;GO:0004497-IEA;GO:0016787-IEA \\ oxidation-reduction process-IEA;monooxygenase activity-IEA;hydrolase activity-IEA \\ GO:0016787 \\ hydrolase activity
TRINITY_DN7351_c0_g1	FvH4_5g15240.1	0.22875	2.12425	1.8955	9.28634	0.011254	0.626833	transcription factor PRE3-like \\ 1.30E-122 \\ 86.03 % \\ GO:0016020-IEA;GO:0016021-IEA;GO:0004672-IEA;GO:0005524-IEA;GO:0006468-IEA \\ membrane-IEA;integral component of membrane-IEA;protein kinase activity-IEA;ATP binding-IEA;protein phosphorylation-IEA \\ GO:0004672;GO:0005524;GO:0006468;GO:0016021 \\ protein kinase activity;ATP binding;protein phosphorylation;integral component of membrane		Myc-type, basic helix-loop-helix (bHLH) domain
TRINITY_DN3395_c0_g3	FvH4_6g17060.1	0.12275	1.12775	1.005	9.18737	0.0310606	0.929067	bromodomain-containing protein 4-like \\ 7.90E-180 \\ 71.69 % \\ GO:0003777-IEA;GO:0000166-IEA;GO:0008270-IEA;GO:0008017-IEA;GO:0003774-IEA;GO:0005524-IEA;GO:0007018-IEA;GO:0003676-IEA \\ microtubule motor activity-IEA;nucleotide binding-IEA;zinc ion binding-IEA;microtubule binding-IEA;motor activity-IEA;ATP binding-IEA;microtubule-based movement-IEA;nucleic acid binding-IEA \\ GO:0005488 \\ bind…		Probable transposase, Ptta/En/Spm, plant
TRINITY_DN1352_c1_g1	FvH4_1g18490.1	0.1255	1.14925	1.02375	9.15737	0.00021469	0.0625139	1-aminocyclopropane-1-carboxylate synthase \\ 0.00E+00 \\ 94.22 % \\ GO:0042218-IEA;GO:0042803-NAS;GO:0030170-NAS;GO:0030170-IEA;GO:0016847-ISS;GO:0016847-IEA;GO:0016847-IDA;GO:0009058-IEA;GO:0003824-IEA;GO:0016491-IEA;GO:0016829-IEA;GO:0009693-IC;GO:0009693-IEA;GO:0055114-IEA;GO:0009835-IEA \\ 1-aminocyclopropane-1-carboxylate biosynthetic process-IEA;protein homodimerization activity-NAS;pyrido…	1-aminocyclopropane-1-carboxylate synthase [EC:4.4.1.14]	Aminotransferases, class-I, pyridoxal-phosphate-binding site
TRINITY_DN1582_c0_g2	FvH4_4g36900.1	0.60625	5.53675	4.9305	9.13278	1.22975e-05	0.0122529	PREDICTED: uncharacterized protein LOC101291915 \\ 8.00E-05 \\ 100.00 % \\ GO:0016787-IEA \\ hydrolase activity-IEA
TRINITY_DN8739_c0_g1	FvH4_5g16540.1	0.853	7.72225	6.86925	9.05305	2.30403e-05	0.0174978	---NA--- \\ 5.00E-08 \\ 79.77 % \\ GO:0009507-IEA;GO:0009561-IEA;GO:0048564-IEA;GO:0009535-IEA;GO:0009534-IEA;GO:0010027-IEA \\ chloroplast-IEA;megagametogenesis-IEA;photosystem I assembly-IEA;chloroplast thylakoid membrane-IEA;chloroplast thylakoid-IEA;thylakoid membrane organization-IEA
TRINITY_DN2341_c0_g1	FvH4_7g04170.1	1.027	9.1985	8.1715	8.95667	0.0202153	0.891005	rust resistance kinase Lr10-like \\ 0.00E+00 \\ 84.46 % \\ GO:0016020-IEA;GO:0016021-IEA;GO:0016310-IEA;GO:0004672-IEA;GO:0030247-IEA;GO:0016301-IEA;GO:0008889-IEA;GO:0005524-IEA;GO:0016787-IEA;GO:0006468-IEA \\ membrane-IEA;integral component of membrane-IEA;phosphorylation-IEA;protein kinase activity-IEA;polysaccharide binding-IEA;kinase activity-IEA;glycerophosphodiester phosphodiesterase acti…		Protein kinase domain
TRINITY_DN2565_c0_g3	FvH4_5g15110.1	0.247	2.21175	1.96475	8.95445	0.0224902	0.929067	glutathione S-transferase U10-like	glutathione S-transferase [EC:2.5.1.18]	Glutathione S-transferase, N-terminal
TRINITY_DN10926_c0_g1	FvH4_1g08290.1	0.1985	1.77625	1.57775	8.94836	0.0127697	0.677686	thermospermine synthase ACAULIS5-like \\ 3.10E-136 \\ 92.59 % \\ GO:0055085-IEA;GO:0015267-IEA;GO:0016020-IEA;GO:0016021-IEA \\ transmembrane transport-IEA;channel activity-IEA;membrane-IEA;integral component of membrane-IEA \\ GO:0015267;GO:0016021;GO:0055085 \\ channel activity;integral component of membrane;transmembrane transport	thermospermine synthase [EC:2.5.1.79]	Spermidine/spermine synthases
TRINITY_DN7234_c0_g1	FvH4_4g01420.1	0.93225	8.28625	7.354	8.88844	1.0479e-06	0.00393691	F-box protein At5g07610-like \\ 1.60E-143 \\ 63.74 %
TRINITY_DN9777_c0_g1	FvH4_3g00360.1	1.5525	13.768	12.2155	8.86828	4.33938e-05	0.025271	nudix hydrolase 2-like \\ 3.10E-29 \\ 84.26 % \\ GO:0010112-IEA \\ regulation of systemic acquired resistance-IEA \\ GO:0010112 \\ regulation of systemic acquired resistance		NUDIX hydrolase domain
TRINITY_DN3585_c0_g1	FvH4_7g15030.1	0.141	1.24775	1.10675	8.84929	0.0394357	0.929067	3-hydroxyisobutyryl-CoA hydrolase 1-like \\ 0.00E+00 \\ 93.67 % \\ GO:0000166-IEA;GO:0016020-IEA;GO:0016021-IEA;GO:0004386-IEA;GO:0016787-IEA;GO:0005524-IEA;GO:0003676-IEA \\ nucleotide binding-IEA;membrane-IEA;integral component of membrane-IEA;helicase activity-IEA;hydrolase activity-IEA;ATP binding-IEA;nucleic acid binding-IEA \\ GO:0003676;GO:0004386;GO:0005524;GO:0016021 \\ nucleic acid bind…	3-hydroxyisobutyryl-CoA hydrolase [EC:3.1.2.4]	ClpP/crotonase-like domain superfamily
TRINITY_DN15324_c0_g1	FvH4_6g09060.1	0.2115	1.8305	1.619	8.65485	0.0244723	0.929067	glucose-6-phosphate 1-dehydrogenase, chloroplastic \\ 6.40E-17 \\ 60.89 % \\ GO:0008233-IEA;GO:0006508-IEA;GO:0008234-IEA;GO:0016787-IEA \\ peptidase activity-IEA;proteolysis-IEA;cysteine-type peptidase activity-IEA;hydrolase activity-IEA \\ GO:0006508;GO:0008234 \\ proteolysis;cysteine-type peptidase activity
TRINITY_DN9693_c0_g1	FvH4_1g19520.1	0.92	7.8905	6.9705	8.57663	0.000235615	0.0658676	putative tetratricopeptide-like helical domain-containing protein \\ 1.30E-148 \\ 82.70 % \\ GO:0016020-IEA;GO:0016021-IEA;GO:0016740-IEA \\ membrane-IEA;integral component of membrane-IEA;transferase activity-IEA \\ GO:0016021;GO:0016740 \\ integral component of membrane;transferase activity		Tetratricopeptide-like helical domain superfamily
TRINITY_DN11638_c0_g1	FvH4_7g02970.1	0.36875	3.14575	2.777	8.53085	9.8519e-07	0.00393691	two-component response regulator ARR9 \\ 0.00E+00 \\ 76.18 % \\ GO:0003677-IEA;GO:0046983-IEA \\ DNA binding-IEA;protein dimerization activity-IEA \\ GO:0046983 \\ protein dimerization activity		Signal transduction response regulator, receiver domain
TRINITY_DN2995_c0_g3	FvH4_3g35490.1	0.13125	1.1145	0.98325	8.49143	9.28252e-05	0.0390132	putative F-box domain-containing protein \\ 0.00E+00 \\ 69.29 %		F-box domain
TRINITY_DN5502_c0_g1	FvH4_4g36220.1	2.38425	19.8385	17.4542	8.32065	0.000862754	0.137217	putative transcription factor interactor and regulator CCHC(Zn) family \\ 0.00E+00 \\ 77.39 % \\ GO:0046872-IEA \\ metal ion binding-IEA \\ GO:0046872 \\ metal ion binding
TRINITY_DN7187_c0_g2	FvH4_6g42780.1	0.155	1.27425	1.11925	8.22097	8.46421e-05	0.0368987	cellulose synthase-like protein H1 isoform X1 \\ 0.00E+00 \\ 79.01 % \\ GO:0016757-IEA;GO:0016020-IEA;GO:0016021-IEA;GO:0016760-IEA;GO:0071555-IEA;GO:0030244-IEA;GO:0016740-IEA \\ transferase activity, transferring glycosyl groups-IEA;membrane-IEA;integral component of membrane-IEA;cellulose synthase (UDP-forming) activity-IEA;cell wall organization-IEA;cellulose biosynthetic process-IEA;transfer…		Cellulose synthase
TRINITY_DN15683_c0_g1	FvH4_6g29420.1	0.291	2.31275	2.02175	7.94759	0.00019052	0.0582856	mavicyanin-like \\ 6.00E-111 \\ 82.18 % \\ GO:0008150-ND;GO:0030570-IEA;GO:0016829-IEA;GO:0005576-IEA;GO:0005975-IEA;GO:0030248-IEA \\ biological_process-ND;pectate lyase activity-IEA;lyase activity-IEA;extracellular region-IEA;carbohydrate metabolic process-IEA;cellulose binding-IEA \\ GO:0005576;GO:0005975;GO:0030248;GO:0030570 \\ extracellular region;carbohydrate metabolic process;cellulose bi…		Phytocyanin domain
TRINITY_DN3149_c0_g1	FvH4_6g04550.1	0.6065	4.79125	4.18475	7.89984	0.000136617	0.0486561	FRIGIDA-like protein 5 isoform X1 \\ 0.00E+00 \\ 68.56 % \\ GO:0007275-IEA;GO:0009908-IEA;GO:0030154-IEA \\ multicellular organism development-IEA;flower development-IEA;cell differentiation-IEA \\ GO:0009908;GO:0030154 \\ flower development;cell differentiation		Frigida-like
TRINITY_DN12616_c0_g2	FvH4_3g15130.1	0.62025	4.8035	4.18325	7.74446	6.7787e-07	0.00348052	kinase RLK-Pelle-DLSV family \\ 0.00E+00 \\ 66.46 % \\ GO:0000166-IEA;GO:0016020-IEA;GO:0016021-IEA;GO:0016310-IEA;GO:0016740-IEA;GO:0004672-IEA;GO:0016301-IEA;GO:0004674-IEA;GO:0005524-IEA;GO:0006468-IEA \\ nucleotide binding-IEA;membrane-IEA;integral component of membrane-IEA;phosphorylation-IEA;transferase activity-IEA;protein kinase activity-IEA;kinase activity-IEA;protein serine/threonine ki…		Protein kinase domain
TRINITY_DN13646_c0_g1	FvH4_5g03030.1	2.18275	16.897	14.7142	7.74115	4.11546e-05	0.0244759	protein SPIRAL1-like 5 \\ 9.70E-06 \\ 60.48 % \\ GO:0016746-IEA;GO:0047372-IEA;GO:0003846-IEA;GO:0005783-IEA;GO:0005794-IEA;GO:0016740-IEA;GO:0016787-IEA \\ transferase activity, transferring acyl groups-IEA;acylglycerol lipase activity-IEA;2-acylglycerol O-acyltransferase activity-IEA;endoplasmic reticulum-IEA;Golgi apparatus-IEA;transferase activity-IEA;hydrolase activity-IEA
TRINITY_DN3181_c0_g1	FvH4_4g26510.1	0.28225	2.14775	1.8655	7.60939	8.48854e-05	0.0368987	glutamate receptor 2.9-like isoform X1 \\ 4.10E-06 \\ 85.98 % \\ GO:0035235-IEA;GO:0016020-IEA;GO:0016021-IEA;GO:0004970-IEA;GO:0006811-IEA \\ ionotropic glutamate receptor signaling pathway-IEA;membrane-IEA;integral component of membrane-IEA;ionotropic glutamate receptor activity-IEA;ion transport-IEA
TRINITY_DN2758_c0_g2	FvH4_1g13610.1	0.7255	5.5185	4.793	7.60648	2.91525e-07	0.00231692	RRP12-like protein \\ 0.00E+00 \\ 68.37 %		Armadillo-like helical
TRINITY_DN10962_c0_g1	FvH4_2g29980.1	0.1885	1.37725	1.18875	7.30637	0.00239098	0.250881	probable 2-oxoglutarate-dependent dioxygenase AOP1 \\ 1.40E-139 \\ 60.71 %		Oxoglutarate/iron-dependent dioxygenase
TRINITY_DN18331_c0_g1	FvH4_6g00880.1	1.68175	12.1743	10.4925	7.23904	0.0369369	0.929067	cytochrome P450 714C2-like \\ 0.00E+00 \\ 86.60 % \\ GO:0005506-IEA;GO:0046872-IEA;GO:0016491-IEA;GO:0016705-IEA;GO:0016020-IEA;GO:0016021-IEA;GO:0020037-IEA;GO:0055114-IEA;GO:0004497-IEA;GO:0050616-IEA \\ iron ion binding-IEA;metal ion binding-IEA;oxidoreductase activity-IEA;oxidoreductase activity, acting on paired donors, with incorporation or reduction of molecular oxygen-IEA;membrane-IEA;int…	cytochrome P450 family 714 subfamily A polypeptide 1	Cytochrome P450
TRINITY_DN10182_c0_g2	FvH4_4g25750.1	0.148	1.06225	0.91425	7.17736	0.000748933	0.125984	putative disease resistance RPP13-like protein 1 \\ 0.00E+00 \\ 65.40 % \\ GO:0043531-IEA;GO:0016787-IEA \\ ADP binding-IEA;hydrolase activity-IEA \\ GO:0016787;GO:0043531 \\ hydrolase activity;ADP binding		Leucine-rich repeat
TRINITY_DN8831_c0_g2	FvH4_1g00390.1	0.4295	3.0705	2.641	7.14901	0.00950661	0.568018	UDP-glycosyltransferase 74E1-like \\ 4.30E-26 \\ 69.74 %		UDP-glucuronosyl/UDP-glucosyltransferase
TRINITY_DN11206_c0_g1	FvH4_6g25380.1	1.12425	7.9645	6.84025	7.08428	0.0023677	0.249458	hypothetical protein RchiOBHm_Chr6g0280951 \\ 8.20E-99 \\ 83.81 % \\ GO:0016491-IEA;GO:0055114-IEA \\ oxidoreductase activity-IEA;oxidation-reduction process-IEA \\ GO:0016491;GO:0055114 \\ oxidoreductase activity;oxidation-reduction process
TRINITY_DN684_c0_g1	FvH4_7g05150.1	2.36875	16.7635	14.3948	7.07694	7.85084e-06	0.00984869	tRNA uridine 5-carboxymethylaminomethyl modification enzyme MnmG \\ 0.00E+00 \\ 92.90 % \\ GO:0050660-IEA;GO:0008033-IEA;GO:0002098-IEA \\ flavin adenine dinucleotide binding-IEA;tRNA processing-IEA;tRNA wobble uridine modification-IEA \\ GO:0002098;GO:0050660 \\ tRNA wobble uridine modification;flavin adenine dinucleotide binding	tRNA uridine 5-carboxymethylaminomethyl modification enzyme	tRNA uridine 5-carboxymethylaminomethyl modification enzyme MnmG-related
TRINITY_DN490_c0_g2	FvH4_7g31540.1	0.5665	4.00475	3.43825	7.06929	5.98169e-05	0.0303543	putative transcription factor interactor and regulator CCHC(Zn) family		Zinc finger, CCHC-type superfamily
TRINITY_DN5956_c0_g3	FvH4_2g10810.1	0.1705	1.20525	1.03475	7.06891	0.00216751	0.235558	putative small auxin-up RNA \\ 1.60E-12 \\ 52.97 % \\ GO:0005737-IBA;GO:0003824-IEA;GO:0045165-IEA;GO:0045165-IGI;GO:0008285-IBA;GO:0045930-IBA;GO:0005634-IBA \\ cytoplasm-IBA;catalytic activity-IEA;cell fate commitment-IEA;cell fate commitment-IGI;negative regulation of cell proliferation-IBA;negative regulation of mitotic cell cycle-IBA;nucleus-IBA \\ GO:0045165 \\ cell fate commitment		Small auxin-up RNA
TRINITY_DN38_c1_g1	FvH4_7g31480.1	0.37125	2.6035	2.23225	7.01279	0.00605311	0.434175	dirigent protein 1-like		Dirigent protein
TRINITY_DN2843_c0_g1	FvH4_6g00630.1	0.189	1.32075	1.13175	6.9881	3.02394e-05	0.0207544	i6 len=2180 path=[1:0-278 4:279-515 5:516-516 6:517-553 7:554-608 10:609-717 11:718-745 13:746-826 14:827-864 17:865-888 18:889-929 20:930-969 22:970-995 23:996-1116 24:1117-1207 26:1208-1235 27:1236-1279 29:1280-1355 31:1356-1605 32:1606-1664 33:1665-1699 35:1700-1700 36:1701-2179]		Protein of unknown function DUF707
TRINITY_DN1773_c0_g1	FvH4_4g10950.1	0.62225	4.33375	3.7115	6.96464	0.00646061	0.452346	---NA--- \\ 0.00E+00 \\ 76.79 %
TRINITY_DN16270_c0_g1	FvH4_5g33160.1	0.16275	1.10475	0.942	6.78802	0.00177372	0.20936	probable serine/threonine-protein kinase At1g09600 isoform X1 \\ 0.00E+00 \\ 83.34 % \\ GO:0016310-IEA;GO:0004672-IEA;GO:0016740-IEA;GO:0016301-IEA;GO:0005524-IEA;GO:0006468-IEA \\ phosphorylation-IEA;protein kinase activity-IEA;transferase activity-IEA;kinase activity-IEA;ATP binding-IEA;protein phosphorylation-IEA \\ GO:0004672;GO:0005524;GO:0006468 \\ protein kinase activity;ATP binding;protei…		Protein kinase domain
TRINITY_DN6805_c0_g1	FvH4_4g03180.1	0.1705	1.147	0.9765	6.72727	0.00173957	0.206995	putative SWI/SNF-related matrix-associated actin-dependent regulator of chromatin subfamily A member 3-like 3 \\ 0.00E+00 \\ 80.43 % \\ GO:0008270-IEA;GO:0046872-IEA;GO:0016818-IEA;GO:0004386-IEA;GO:0016740-IEA;GO:0005524-IEA;GO:0016787-IEA;GO:0003676-IEA \\ zinc ion binding-IEA;metal ion binding-IEA;hydrolase activity, acting on acid anhydrides, in phosphorus-containing anhydrides-IEA;helicase a…	DNA repair protein RAD5 [EC:3.6.4.-]	SNF2-related, N-terminal domain
TRINITY_DN4220_c0_g1	FvH4_3g37040.1	0.52075	3.48175	2.961	6.68603	0.0112421	0.626627	eukaryotic translation initiation factor 3 subunit G-like
TRINITY_DN1213_c0_g2	FvH4_1g07340.1	0.19375	1.272	1.07825	6.56516	0.0431343	0.929067	---NA--- \\ 2.20E-19 \\ 87.81 % \\ GO:0005509-IEA;GO:0005886-IEA \\ calcium ion binding-IEA;plasma membrane-IEA \\ GO:0005509;GO:0005886 \\ calcium ion binding;plasma membrane
TRINITY_DN52_c3_g2	FvH4_5g00910.1	0.1765	1.1415	0.965	6.46742	0.0310819	0.929067	AT-hook motif nuclear-localized protein 24 \\ 2.50E-31 \\ 88.31 % \\ GO:0016020-IEA;GO:0016021-IEA;GO:0016310-IEA;GO:0016740-IEA;GO:0016301-IEA;GO:0004674-IEA;GO:0006468-IEA \\ membrane-IEA;integral component of membrane-IEA;phosphorylation-IEA;transferase activity-IEA;kinase activity-IEA;protein serine/threonine kinase activity-IEA;protein phosphorylation-IEA \\ GO:0004674;GO:0006468;GO:0016021 …		PPC domain
TRINITY_DN3333_c0_g3	FvH4_6g20340.1	0.4275	2.7645	2.337	6.46667	0.00225798	0.24229	---NA---
TRINITY_DN1353_c0_g3	FvH4_4g18600.1	0.32325	2.081	1.75775	6.43774	0.000429153	0.0933021	bifunctional epoxide hydrolase 2-like \\ 9.40E-52 \\ 62.51 % \\ GO:0090305-IEA;GO:0005737-IEA;GO:0004527-IEA;GO:0000175-IEA;GO:0003725-IEA;GO:0060906-IEA;GO:0032296-IEA;GO:0000467-IEA;GO:0003676-IEA \\ nucleic acid phosphodiester bond hydrolysis-IEA;cytoplasm-IEA;exonuclease activity-IEA;3'-5'-exoribonuclease activity-IEA;double-stranded RNA binding-IEA;negative regulation of chromatin silencing …		Alpha/beta hydrolase fold-1
TRINITY_DN3545_c0_g1	FvH4_3g44860.1	12.1327	77.0452	64.9125	6.35019	0.000321083	0.0790706	PREDICTED: uncharacterized protein LOC101299279 \\ 1.30E-75 \\ 94.08 % \\ GO:0005773-IEA \\ vacuole-IEA \\ GO:0005773 \\ vacuole		Protein of unknown function DUF538
TRINITY_DN1487_c0_g1	FvH4_3g29970.1	0.1865	1.177	0.9905	6.31099	0.0222447	0.929067	splicing factor U2af small subunit B-like \\ 2.10E-109 \\ 81.65 % \\ GO:0089701-IEA;GO:0000398-IEA;GO:0003723-IEA;GO:0046872-IEA;GO:0003676-IEA \\ U2AF-IEA;mRNA splicing, via spliceosome-IEA;RNA binding-IEA;metal ion binding-IEA;nucleic acid binding-IEA \\ GO:0000398;GO:0003723;GO:0046872;GO:0089701 \\ mRNA splicing, via spliceosome;RNA binding;metal ion binding;U2AF	splicing factor U2AF 35 kDa subunit	RNA recognition motif domain
TRINITY_DN3945_c0_g1	FvH4_4g29330.1	0.8665	5.446	4.5795	6.28505	0.00532514	0.40377	cytosolic sulfotransferase 12-like \\ 7.30E-26 \\ 50.38 %		Sulfotransferase domain
TRINITY_DN1746_c0_g1	FvH4_7g18610.1	0.26325	1.6475	1.38425	6.25831	0.000208438	0.0612724	putative ribonuclease H-like domain-containing protein \\ 2.40E-127 \\ 74.74 % \\ GO:0003964-IEA;GO:0016779-IEA;GO:0090502-IEA;GO:0016717-IEA;GO:0016020-IEA;GO:0016021-IEA;GO:0006278-IEA;GO:0055114-IEA;GO:0016740-IEA;GO:0004523-IEA;GO:0003676-IEA \\ RNA-directed DNA polymerase activity-IEA;nucleotidyltransferase activity-IEA;RNA phosphodiester bond hydrolysis, endonucleolytic-IEA;oxidoreductase a…
TRINITY_DN17691_c0_g1	FvH4_5g08510.1	4.90875	30.4405	25.5318	6.20127	3.97961e-05	0.0240392	PREDICTED: uncharacterized protein LOC101294753 \\ 0.00E+00 \\ 91.47 % \\ GO:0000166-IEA;GO:0016020-IEA;GO:0016021-IEA;GO:0016310-IEA;GO:0004672-IEA;GO:0016301-IEA;GO:0004674-IEA;GO:0005524-IEA;GO:0006468-IEA \\ nucleotide binding-IEA;membrane-IEA;integral component of membrane-IEA;phosphorylation-IEA;protein kinase activity-IEA;kinase activity-IEA;protein serine/threonine kinase activity-IEA;ATP…		Protein of unknown function DUF3339
TRINITY_DN24495_c0_g1	FvH4_6g28350.1	0.7595	4.6985	3.939	6.18631	0.0133942	0.699267	hypothetical protein RchiOBHm_Chr2g0132421 \\ 7.30E-56 \\ 75.64 % \\ GO:0016020-IEA;GO:0016021-IEA \\ membrane-IEA;integral component of membrane-IEA
TRINITY_DN136487_c0_g1	FvH4_3g12600.1	0.16575	1.022	0.85625	6.16591	0.00117221	0.164071	putative START-like domain-containing protein \\ 0.00E+00 \\ 85.26 %		Coenzyme Q-binding protein COQ10, START domain
TRINITY_DN3043_c0_g1	FvH4_7g07790.1	0.38975	2.3915	2.00175	6.13598	0.00163987	0.200041	calmodulin-binding transcription activator 3-like \\ 0.00E+00 \\ 59.96 % \\ GO:0003677-IEA;GO:0005634-IEA \\ DNA binding-IEA;nucleus-IEA	calmodulin-binding transcription activator	IPT domain
TRINITY_DN3787_c0_g1	FvH4_3g29400.1	0.2375	1.44825	1.21075	6.09789	1.42395e-05	0.0135394	two-pore potassium channel 1-like	potassium channel subfamily K, other eukaryote	Two pore domain potassium channel
TRINITY_DN1437_c0_g5	FvH4_2g00540.1	0.22975	1.39525	1.1655	6.07291	0.00116167	0.16334	TMV resistance protein N-like \\ 0.00E+00 \\ 75.70 % \\ GO:0007165-IEA;GO:0043531-IEA;GO:0016787-IEA \\ signal transduction-IEA;ADP binding-IEA;hydrolase activity-IEA \\ GO:0007165;GO:0016787;GO:0043531 \\ signal transduction;hydrolase activity;ADP binding		Toll/interleukin-1 receptor homology (TIR) domain
TRINITY_DN1840_c0_g2	FvH4_6g02070.1	0.273	1.6465	1.3735	6.03114	0.000474554	0.0981897	putative galactose oxidase/kelch, beta-propeller, galactose oxidase, beta-propeller \\ 3.60E-93 \\ 84.85 % \\ GO:0003824-IEA;GO:0055114-IEA;GO:0004375-IEA;GO:0006546-IEA;GO:0051082-IEA;GO:0006544-IEA;GO:0006457-IEA \\ catalytic activity-IEA;oxidation-reduction process-IEA;glycine dehydrogenase (decarboxylating) activity-IEA;glycine catabolic process-IEA;unfolded protein binding-IEA;glycine metabo…		Galactose oxidase/kelch, beta-propeller
TRINITY_DN5451_c0_g1	FvH4_7g11190.1	2.41	14.5047	12.0947	6.01857	0.00609892	0.435635	putative lipid-binding protein At4g00165		Bifunctional inhibitor/plant lipid transfer protein/seed storage helical domain
TRINITY_DN4636_c1_g2	FvH4_3g15690.1	0.4755	2.846	2.3705	5.98528	0.00102137	0.151331	G-type lectin S-receptor-like serine/threonine-protein kinase At4g27290 isoform X1 \\ 0.00E+00 \\ 84.81 % \\ GO:0000166-IEA;GO:0048544-IEA;GO:0016020-IEA;GO:0016021-IEA;GO:0016310-IEA;GO:0004672-IEA;GO:0016740-IEA;GO:0016301-IEA;GO:0004674-IEA;GO:0005524-IEA;GO:0006468-IEA \\ nucleotide binding-IEA;recognition of pollen-IEA;membrane-IEA;integral component of membrane-IEA;phosphorylation-IEA;prote…		Protein kinase domain
TRINITY_DN3193_c0_g1	FvH4_4g08130.1	0.40075	2.3715	1.97075	5.91765	0.0170025	0.803245	---NA--- \\ 2.20E-05 \\ 98.09 % \\ GO:0000166-IEA;GO:0016020-IEA;GO:0016021-IEA;GO:0016787-IEA;GO:0005524-IEA \\ nucleotide binding-IEA;membrane-IEA;integral component of membrane-IEA;hydrolase activity-IEA;ATP binding-IEA
TRINITY_DN5429_c0_g2	FvH4_3g09830.1	1.099	6.472	5.373	5.88899	2.79833e-05	0.0198161	nitrate regulatory gene2 protein \\ 0.00E+00 \\ 78.94 %		Domain of unknown function DUF632
TRINITY_DN1748_c2_g1	FvH4_5g00100.1	37.2913	219.476	182.185	5.88547	0.000143937	0.049713	14 kDa proline-rich protein DC2.15-like \\ 0.00E+00 \\ 75.01 % \\ GO:0055085-IEA;GO:0016020-IEA;GO:0016021-IEA;GO:0005215-IEA \\ transmembrane transport-IEA;membrane-IEA;integral component of membrane-IEA;transporter activity-IEA \\ GO:0005215;GO:0016021;GO:0055085 \\ transporter activity;integral component of membrane;transmembrane transport
TRINITY_DN11567_c0_g1	FvH4_2g02880.1	30.0025	174.571	144.569	5.81856	0.00957039	0.570833	basic form of pathogenesis-related protein 1-like \\ 7.60E-162 \\ 83.14 % \\ GO:0016740-IEA;GO:0004364-IEA \\ transferase activity-IEA;glutathione transferase activity-IEA \\ GO:0004364 \\ glutathione transferase activity		Cysteine-rich secretory protein, allergen V5/Tpx-1-related
TRINITY_DN4929_c1_g1	FvH4_6g50960.1	4.072	23.267	19.195	5.7139	0.00517072	0.397045	polygalacturonase At1g48100 \\ 0.00E+00 \\ 82.53 % \\ GO:0008152-IEA;GO:0016020-IEA;GO:0016829-IEA;GO:0016021-IEA;GO:0071555-IEA;GO:0004650-IEA;GO:0005576-IEA;GO:0016787-IEA;GO:0016798-IEA;GO:0005975-IEA \\ metabolic process-IEA;membrane-IEA;lyase activity-IEA;integral component of membrane-IEA;cell wall organization-IEA;polygalacturonase activity-IEA;extracellular region-IEA;hydrolase activity-I…	polygalacturonase [EC:3.2.1.15]	Glycoside hydrolase, family 28
TRINITY_DN8875_c1_g1	FvH4_2g03180.1	1.61625	9.177	7.56075	5.67796	1.9716e-06	0.00542313	UDP-glycosyltransferase 74G1-like \\ 0.00E+00 \\ 83.67 % \\ GO:0016757-IEA;GO:0016758-IEA;GO:0016740-IEA \\ transferase activity, transferring glycosyl groups-IEA;transferase activity, transferring hexosyl groups-IEA;transferase activity-IEA \\ GO:0016758 \\ transferase activity, transferring hexosyl groups	pathogen-inducible salicylic acid glucosyltransferase [EC:2.4.1.-]	UDP-glucuronosyl/UDP-glucosyltransferase
TRINITY_DN4278_c0_g1	FvH4_6g50450.1	1.7695	10.0427	8.27325	5.67547	0.000151584	0.0515437	putative kelch-type beta propeller \\ 3.70E-117 \\ 87.24 % \\ GO:0008171-IEA;GO:0042409-IEA;GO:0005829-IEA;GO:0102822-IEA;GO:0016740-IEA;GO:0008168-IEA;GO:0032259-IEA;GO:0030744-IEA \\ O-methyltransferase activity-IEA;caffeoyl-CoA O-methyltransferase activity-IEA;cytosol-IEA;quercetin 3'-O-methyltransferase activity-IEA;transferase activity-IEA;methyltransferase activity-IEA;methylation-IEA;luteo…		Kelch-type beta propeller
TRINITY_DN10919_c1_g1	FvH4_6g19760.1	39.8537	225.429	185.575	5.65641	0.00544785	0.408259	40S ribosomal protein S17 \\ 0.00E+00 \\ 83.10 % \\ GO:0000166-IEA;GO:0016020-IEA;GO:0016021-IEA;GO:0005524-IEA \\ nucleotide binding-IEA;membrane-IEA;integral component of membrane-IEA;ATP binding-IEA \\ GO:0005524;GO:0016021 \\ ATP binding;integral component of membrane	small subunit ribosomal protein S17e	Ribosomal protein S17e
TRINITY_DN5228_c0_g1	FvH4_2g13820.1	0.2065	1.1675	0.961	5.65375	0.00457265	0.36964	glucose-1-phosphate adenylyltransferase large subunit, chloroplastic/amyloplastic-like \\ 5.90E-06 \\ 78.18 % \\ GO:0000166-IEA;GO:0016779-IEA;GO:0009507-IEA;GO:0005978-IEA;GO:0009058-IEA;GO:0019252-IEA;GO:0016740-IEA;GO:0008878-IEA;GO:0005524-IEA;GO:0009536-IEA \\ nucleotide binding-IEA;nucleotidyltransferase activity-IEA;chloroplast-IEA;glycogen biosynthetic process-IEA;biosynthetic process-IEA…
TRINITY_DN1230_c0_g2	FvH4_6g46880.1	0.52975	2.9855	2.45575	5.63568	1.96001e-05	0.0161882	protein NPGR2-like isoform X1
TRINITY_DN3193_c0_g2	FvH4_3g39540.1	0.21175	1.183	0.97125	5.58678	0.012056	0.65604	LOB domain-containing protein 12		Lateral organ boundaries, LOB
TRINITY_DN265063_c0_g1	FvH4_6g12690.1	0.27025	1.5085	1.23825	5.58187	0.00971659	0.574878	glutathione S-transferase U8-like \\ 8.60E-13 \\ 57.94 % \\ GO:0003735-IEA;GO:0005840-IEA;GO:0006412-IEA;GO:0005622-IEA \\ structural constituent of ribosome-IEA;ribosome-IEA;translation-IEA;intracellular-IEA	glutathione S-transferase [EC:2.5.1.18]	Glutathione S-transferase, N-terminal
TRINITY_DN2068_c0_g1	FvH4_3g05290.1	0.57375	3.202	2.62825	5.58083	0.00522786	0.399583	protease Do-like 5, chloroplastic \\ 0.00E+00 \\ 92.23 % \\ GO:0006418-IEA;GO:0000166-IEA;GO:0005737-IEA;GO:0004824-IEA;GO:0004812-IEA;GO:0003746-IEA;GO:0016874-IEA;GO:0006430-IEA;GO:0006414-IEA;GO:0005576-IEA;GO:0005524-IEA;GO:0009405-IEA;GO:0003676-IEA \\ tRNA aminoacylation for protein translation-IEA;nucleotide binding-IEA;cytoplasm-IEA;lysine-tRNA ligase activity-IEA;aminoacyl-tRNA ligase ac…		Peptidase S1C
TRINITY_DN5662_c0_g1	FvH4_4g33990.1	0.772	4.289	3.517	5.5557	0.000153496	0.0519049	gamma-tubulin complex component 6 isoform X1 \\ 0.00E+00 \\ 79.02 % \\ GO:0005815-IEA;GO:0007020-IEA;GO:0000922-IEA;GO:0043015-IEA;GO:0000226-IEA \\ microtubule organizing center-IEA;microtubule nucleation-IEA;spindle pole-IEA;gamma-tubulin binding-IEA;microtubule cytoskeleton organization-IEA \\ GO:0000922;GO:0005815;GO:0007020;GO:0043015 \\ spindle pole;microtubule organizing center;microtubule…		Gamma-tubulin complex component protein
TRINITY_DN6232_c0_g1	FvH4_4g09140.1	0.18175	1.00275	0.821	5.51719	0.0133135	0.69687	---NA--- \\ 3.00E-09 \\ 96.87 % \\ GO:0016746-IEA;GO:0004839-IEA;GO:0016740-IEA;GO:0016874-IEA;GO:0016567-IEA \\ transferase activity, transferring acyl groups-IEA;ubiquitin activating enzyme activity-IEA;transferase activity-IEA;ligase activity-IEA;protein ubiquitination-IEA \\ GO:0004839;GO:0016567;GO:0016746 \\ ubiquitin activating enzyme activity;protein ubiquitination;transferase activity, t…
TRINITY_DN8390_c0_g1	FvH4_6g21020.1	0.2295	1.2495	1.02	5.44444	0.0052887	0.401698	calcium-dependent protein kinase 20 \\ 0.00E+00 \\ 89.31 % \\ GO:0000166-IEA;GO:0005509-IEA;GO:0016310-IEA;GO:0004672-IEA;GO:0016740-IEA;GO:0016301-IEA;GO:0004674-IEA;GO:0005524-IEA;GO:0006468-IEA \\ nucleotide binding-IEA;calcium ion binding-IEA;phosphorylation-IEA;protein kinase activity-IEA;transferase activity-IEA;kinase activity-IEA;protein serine/threonine kinase activity-IEA;ATP binding-IE…	calcium-dependent protein kinase [EC:2.7.11.1]	Protein kinase domain
TRINITY_DN2729_c0_g1	FvH4_6g47060.1	1.00225	5.42875	4.4265	5.41656	0.00414133	0.347569	putative transcription factor C2H2 family \\ 2.40E-06 \\ 93.33 %
TRINITY_DN19786_c0_g1	FvH4_1g03770.1	0.8185	4.4115	3.593	5.38974	3.37654e-06	0.00706495	protein kinase PINOID 2 \\ 1.10E-108 \\ 79.80 %		Protein kinase domain
TRINITY_DN481_c0_g1	FvH4_1g10370.1	3.953	21.255	17.302	5.37693	0.000241998	0.0668033	putative WRB/Get1 family protein \\ 1.90E-20 \\ 74.48 % \\ GO:0090305-IEA;GO:0004536-IEA;GO:0042802-IEA;GO:0090501-IEA;GO:0004527-IEA;GO:0003727-IEA;GO:0003690-IEA;GO:0004540-IEA;GO:0005840-IEA;GO:0006259-IEA \\ nucleic acid phosphodiester bond hydrolysis-IEA;deoxyribonuclease activity-IEA;identical protein binding-IEA;RNA phosphodiester bond hydrolysis-IEA;exonuclease activity-IEA;single-strande…
TRINITY_DN298529_c0_g1	FvH4_2g06620.1	0.4795	2.57125	2.09175	5.36236	0.00887768	0.545027	2-hydroxyisoflavanone dehydratase-like \\ 1.10E-165 \\ 61.34 % \\ GO:0003964-IEA;GO:0016491-IEA;GO:0006508-IEA;GO:0055114-IEA;GO:0016740-IEA;GO:0016779-IEA;GO:0008270-IEA;GO:0004491-IEA;GO:0008233-IEA;GO:0006278-IEA;GO:0015074-IEA;GO:0000943-IEA;GO:0003676-IEA \\ RNA-directed DNA polymerase activity-IEA;oxidoreductase activity-IEA;proteolysis-IEA;oxidation-reduction process-IEA;transferase activi…		Alpha/beta hydrolase fold-3
TRINITY_DN3139_c0_g3	FvH4_7g21940.1	2.0785	11.039	8.9605	5.31104	7.04186e-05	0.0332688	39S ribosomal protein L46, mitochondrial-like \\ 0.00E+00 \\ 91.14 % \\ GO:0008152-IEA;GO:0016020-IEA;GO:0016021-IEA;GO:0004650-IEA;GO:0016787-IEA;GO:0005975-IEA;GO:0016798-IEA \\ metabolic process-IEA;membrane-IEA;integral component of membrane-IEA;polygalacturonase activity-IEA;hydrolase activity-IEA;carbohydrate metabolic process-IEA;hydrolase activity, acting on glycosyl bonds-IEA \\ GO:00046…	large subunit ribosomal protein L46
TRINITY_DN845_c0_g4	FvH4_6g13100.1	0.248	1.298	1.05	5.23387	0.019353	0.866753	tropinone reductase homolog \\ 0.00E+00 \\ 90.17 % \\ GO:0006418-IEA;GO:0000166-IEA;GO:0005737-IEA;GO:0004812-IEA;GO:0006436-IEA;GO:0006436-IBA;GO:0016874-IEA;GO:0006412-IEA;GO:0005524-IEA;GO:0004830-IEA;GO:0004830-IBA \\ tRNA aminoacylation for protein translation-IEA;nucleotide binding-IEA;cytoplasm-IEA;aminoacyl-tRNA ligase activity-IEA;tryptophanyl-tRNA aminoacylation-IEA;tryptophanyl-tRNA am…	tropinone reductase I [EC:1.1.1.206]	Short-chain dehydrogenase/reductase SDR
TRINITY_DN13341_c0_g1	FvH4_6g29800.1	5.819	30.367	24.548	5.21859	0.000198348	0.0594986	cucumber peeling cupredoxin-like		Phytocyanin domain
TRINITY_DN8164_c0_g1	FvH4_6g48140.1	0.71475	3.6705	2.95575	5.13536	0.000264008	0.0701145	casparian strip membrane protein 1		Casparian strip membrane protein
TRINITY_DN13820_c0_g2	FvH4_1g20160.1	0.2895	1.473	1.1835	5.08808	0.00121386	0.167968	transcription factor bHLH94-like		Myc-type, basic helix-loop-helix (bHLH) domain
TRINITY_DN3850_c0_g1	FvH4_2g08560.1	35.2543	177.851	142.597	5.04482	0.00202568	0.225208	organ-specific protein S2-like \\ 6.20E-87 \\ 60.72 % \\ GO:0016020-IEA;GO:0016021-IEA \\ membrane-IEA;integral component of membrane-IEA		Organ specific protein
TRINITY_DN7922_c0_g1	FvH4_6g11440.1	49.5875	249.464	199.877	5.03079	0.0437632	0.929067	(-)-germacrene D synthase-like \\ 0.00E+00 \\ 78.46 % \\ GO:0000287-IEA;GO:0046872-IEA;GO:0016829-IEA;GO:0010333-IEA \\ magnesium ion binding-IEA;metal ion binding-IEA;lyase activity-IEA;terpene synthase activity-IEA \\ GO:0016829;GO:0046872 \\ lyase activity;metal ion binding	(-)-germacrene D synthase [EC:4.2.3.75]	Terpene synthase, N-terminal domain
TRINITY_DN12804_c0_g1	FvH4_2g38480.1	8.45975	42.2972	33.8375	4.99982	0.00190862	0.218016	gibberellin-regulated protein 1-like \\ 5.70E-87 \\ 86.89 % \\ GO:0055085-IEA;GO:0016020-IEA;GO:0016021-IEA;GO:0022857-IEA;GO:0006865-IEA \\ transmembrane transport-IEA;membrane-IEA;integral component of membrane-IEA;transmembrane transporter activity-IEA;amino acid transport-IEA \\ GO:0006865;GO:0016021;GO:0022857;GO:0055085 \\ amino acid transport;integral component of membrane;transmembrane tr…		Gibberellin regulated protein
TRINITY_DN7661_c0_g1	FvH4_4g05820.1	0.2605	1.29925	1.03875	4.98752	0.045447	0.929067	purple acid phosphatase 23 \\ 1.70E-13 \\ 70.74 % \\ GO:0046872-IEA;GO:0016020-IEA;GO:0016021-IEA;GO:0016311-IEA;GO:0003993-IEA;GO:0016787-IEA \\ metal ion binding-IEA;membrane-IEA;integral component of membrane-IEA;dephosphorylation-IEA;acid phosphatase activity-IEA;hydrolase activity-IEA \\ GO:0016020;GO:0016787 \\ membrane;hydrolase activity
TRINITY_DN323122_c0_g1	FvH4_2g38040.1	0.98225	4.8985	3.91625	4.98702	0.00440722	0.36152	expansin-A11 \\ 2.80E-07 \\ 93.16 %		Expansin
TRINITY_DN16268_c0_g1	FvH4_3g43360.1	0.2905	1.4465	1.156	4.97935	0.00266613	0.269042	G-type lectin S-receptor-like serine/threonine-protein kinase B120 \\ 3.80E-148 \\ 87.19 %		Serine-threonine/tyrosine-protein kinase, catalytic domain
TRINITY_DN1769_c2_g2	FvH4_7g15170.1	6.099	30.1325	24.0335	4.94056	0.0116799	0.641755	C-terminal binding protein AN \\ 3.50E-41 \\ 89.95 % \\ GO:0016740-IEA;GO:0004672-IEA;GO:0005524-IEA;GO:0006468-IEA \\ transferase activity-IEA;protein kinase activity-IEA;ATP binding-IEA;protein phosphorylation-IEA \\ GO:0004672;GO:0005524;GO:0006468 \\ protein kinase activity;ATP binding;protein phosphorylation
TRINITY_DN22839_c0_g1	FvH4_6g33210.1	0.22925	1.132	0.90275	4.93784	0.00051151	0.10239	probable LRR receptor-like serine/threonine-protein kinase At1g05700 \\ 0.00E+00 \\ 76.35 % \\ GO:0016020-IEA;GO:0016021-IEA;GO:0004672-IEA;GO:0016740-IEA;GO:0005524-IEA;GO:0006468-IEA \\ membrane-IEA;integral component of membrane-IEA;protein kinase activity-IEA;transferase activity-IEA;ATP binding-IEA;protein phosphorylation-IEA \\ GO:0005524;GO:0016021;GO:0016740 \\ ATP binding;integral compon…		Protein kinase domain
TRINITY_DN8970_c0_g1	FvH4_5g05910.1	1.96425	9.626	7.66175	4.9006	0.0106595	0.606439	hypothetical protein RchiOBHm_Chr7g0192821 \\ 0.00E+00 \\ 87.57 % \\ GO:0048046-IEA;GO:0005618-IEA;GO:0071555-IEA;GO:0016740-IEA;GO:0016762-IEA;GO:0016798-IEA;GO:0016787-IEA;GO:0010411-IEA;GO:0008152-IEA;GO:0016757-IEA;GO:0006073-IEA;GO:0009831-IEA;GO:0004553-IEA;GO:0005576-IEA;GO:0042546-IEA;GO:0005975-IEA;GO:0005887-IEA \\ apoplast-IEA;cell wall-IEA;cell wall organization-IEA;transferase activi…
TRINITY_DN16463_c0_g1	FvH4_2g26680.1	0.9925	4.86025	3.86775	4.89698	3.45542e-05	0.0222701	putative glutaredoxin, thioredoxin-like protein \\ 2.80E-52 \\ 86.02 % \\ GO:0055114-IEA \\ oxidation-reduction process-IEA \\ GO:0055114 \\ oxidation-reduction process		Glutaredoxin-like
TRINITY_DN1508_c0_g2	FvH4_2g23620.1	3.20175	15.577	12.3752	4.86515	9.29993e-06	0.0106112	protein FANTASTIC FOUR 1-like \\ 1.40E-111 \\ 71.11 % \\ GO:0070062-N/A;GO:0042493-TAS;GO:0016020-N/A;GO:0016020-IEA;GO:0016020-TAS;GO:0016020-IBA;GO:0016021-IEA;GO:0042908-IBA;GO:0016323-IBA;GO:0016323-IDA;GO:0015889-IEA;GO:0016787-IEA;GO:0016887-IEA;GO:0016887-IDA;GO:0055085-IEA;GO:0055085-TAS;GO:0055085-IBA;GO:0015420-TAS;GO:0006691-TAS;GO:0043225-TAS;GO:0004012-IMP;GO:0008559-IBA;GO:0006855-I…		The fantastic four family
TRINITY_DN3624_c0_g2	FvH4_7g17540.1	0.29025	1.39425	1.104	4.80362	0.0116751	0.641755	NAC domain-containing protein 43		NAC domain
TRINITY_DN1664_c0_g2	FvH4_6g49020.1	28.5062	136.643	108.136	4.79342	3.61664e-05	0.0227848	putative transcription factor interactor and regulator CCHC(Zn) family \\ 6.10E-32 \\ 91.17 % \\ GO:0016020-IEA;GO:0016021-IEA;GO:0009055-IEA;GO:0022900-IEA;GO:0046658-IBA \\ membrane-IEA;integral component of membrane-IEA;electron transfer activity-IEA;electron transport chain-IEA;anchored component of plasma membrane-IBA \\ GO:0009055;GO:0016021;GO:0022900;GO:0046658 \\ electron transfer activi…
TRINITY_DN4797_c1_g1	FvH4_6g49380.1	0.65925	3.1595	2.50025	4.79257	0.00183197	0.213106	inositol hexakisphosphate and diphosphoinositol-pentakisphosphate kinase VIP2-like isoform X3 \\ 0.00E+00 \\ 95.36 % \\ GO:0000166-IEA;GO:0005737-IEA;GO:0046872-IEA;GO:0102092-IEA;GO:0005829-IEA;GO:0016310-IEA;GO:0016740-IEA;GO:0016301-IEA;GO:0033857-IEA;GO:0052723-IEA;GO:0052724-IEA;GO:0000829-IEA;GO:0000832-IEA;GO:0005524-IEA \\ nucleotide binding-IEA;cytoplasm-IEA;metal ion binding-IEA;5-dipho…	inositol-hexakisphosphate/diphosphoinositol-pentakisphosphate 1-kinase [EC:2.7.4.24]	Histidine phosphatase superfamily, clade-2
TRINITY_DN22583_c0_g1	FvH4_1g21450.1	1.0485	4.971	3.9225	4.74106	0.00187667	0.215566	inositol-3-phosphate synthase \\ 0.00E+00 \\ 98.13 % \\ GO:0006021-IEA;GO:0008654-IEA;GO:0004512-IEA;GO:0016853-IEA \\ inositol biosynthetic process-IEA;phospholipid biosynthetic process-IEA;inositol-3-phosphate synthase activity-IEA;isomerase activity-IEA \\ GO:0004512;GO:0006021;GO:0008654 \\ inositol-3-phosphate synthase activity;inositol biosynthetic process;phospholipid biosynthetic process	myo-inositol-1-phosphate synthase [EC:5.5.1.4]	Myo-inositol-1-phosphate synthase
TRINITY_DN26459_c0_g1	FvH4_5g24010.1	0.3995	1.8865	1.487	4.72215	0.000424229	0.0927824	peroxidase N1-like \\ 7.80E-33 \\ 84.57 % \\ GO:0005856-IEA;GO:0003777-IEA;GO:0003777-IBA;GO:0000166-IEA;GO:0005737-IEA;GO:0016020-IEA;GO:0016021-IEA;GO:0099609-IMP;GO:0016887-IBA;GO:0015630-IDA;GO:0008574-IBA;GO:0008017-IEA;GO:0008017-IBA;GO:0005871-IBA;GO:0005874-IEA;GO:0005874-IBA;GO:0005524-IEA;GO:0003774-IEA;GO:0007018-IEA;GO:0007018-IBA \\ cytoskeleton-IEA;microtubule motor activity-IEA;mic…	peroxidase [EC:1.11.1.7]	Plant peroxidase
TRINITY_DN23722_c0_g1	FvH4_5g03780.1	0.56025	2.636	2.07575	4.70504	1.4761e-05	0.01378	PREDICTED: uncharacterized protein LOC101301686 \\ 7.60E-112 \\ 96.29 % \\ GO:0003712-IEA;GO:0009910-IEA;GO:1903506-IEA \\ transcription coregulator activity-IEA;negative regulation of flower development-IEA;regulation of nucleic acid-templated transcription-IEA \\ GO:0003712;GO:0009910;GO:1903506 \\ transcription coregulator activity;negative regulation of flower development;regulation of nuclei…		Protein of unknown function DUF1191
TRINITY_DN4889_c0_g1	FvH4_3g36060.1	2.08	9.777	7.697	4.70048	2.3804e-05	0.0178426	pentatricopeptide repeat-containing protein At1g07590, mitochondrial \\ 0.00E+00 \\ 90.72 % \\ GO:0005739-IBA;GO:0046686-IEA \\ mitochondrion-IBA;response to cadmium ion-IEA \\ GO:0005739;GO:0046686 \\ mitochondrion;response to cadmium ion		Pentatricopeptide repeat
TRINITY_DN201762_c0_g1	FvH4_6g20550.1	0.47675	2.223	1.74625	4.66282	0.0115084	0.636142	PREDICTED: uncharacterized protein LOC101311590 \\ 9.50E-13 \\ 68.45 % \\ GO:0016020-IEA;GO:0016021-IEA \\ membrane-IEA;integral component of membrane-IEA
TRINITY_DN514_c0_g1	FvH4_4g21190.1	0.69925	3.2465	2.54725	4.64283	4.74624e-06	0.00837656	putative ubiquitinyl hydrolase 1 \\ 6.20E-175 \\ 56.24 % \\ GO:0008233-IEA;GO:0006508-IEA \\ peptidase activity-IEA;proteolysis-IEA		MATH/TRAF domain
TRINITY_DN3668_c1_g1	FvH4_1g06840.1	0.3625	1.68275	1.32025	4.64207	0.0138278	0.712808	probable caffeoyl-CoA O-methyltransferase At4g26220 \\ 9.80E-156 \\ 75.75 % \\ GO:0003677-IEA;GO:0003899-IEA;GO:0006351-IEA;GO:0005634-IEA \\ DNA binding-IEA;DNA-directed 5'-3' RNA polymerase activity-IEA;transcription, DNA-templated-IEA;nucleus-IEA \\ GO:0003677;GO:0003899;GO:0005634;GO:0006351 \\ DNA binding;DNA-directed 5'-3' RNA polymerase activity;nucleus;transcription, DNA-templated	deoxyhypusine synthase [EC:2.5.1.46]	O-methyltransferase, family 3
TRINITY_DN2218_c5_g1	FvH4_2g17750.1	3.09675	14.3655	11.2688	4.6389	6.18393e-06	0.00911523	transcription factor IBH1-like \\ 0.00E+00 \\ 78.30 % \\ GO:0006914-IEA;GO:0000045-IBA;GO:0000407-IBA;GO:0015031-IEA;GO:0030242-IEA;GO:0005770-IEA;GO:0019898-IBA;GO:0000422-IBA \\ autophagy-IEA;autophagosome assembly-IBA;phagophore assembly site-IBA;protein transport-IEA;autophagy of peroxisome-IEA;late endosome-IEA;extrinsic component of membrane-IBA;autophagy of mitochondrion-IBA \\ GO:0000045;…		Helix-loop-helix DNA-binding domain superfamily
TRINITY_DN23479_c0_g1	FvH4_5g02800.1	0.53075	2.44925	1.9185	4.6147	0.000232113	0.0654673	putative transcription factor C2H2 family \\ 1.70E-05 \\ 100.00 %		Zinc finger, RING-type
TRINITY_DN4950_c0_g1	FvH4_7g24870.1	0.4565	2.09775	1.64125	4.59529	0.00589804	0.427431	golgin subfamily A member 6-like protein 1 \\ 0.00E+00 \\ 75.09 % \\ GO:0004190-IEA;GO:0004190-IBA;GO:0008233-IEA;GO:0006508-IEA;GO:0006508-IBA;GO:0030163-IBA;GO:0016787-IEA \\ aspartic-type endopeptidase activity-IEA;aspartic-type endopeptidase activity-IBA;peptidase activity-IEA;proteolysis-IEA;proteolysis-IBA;protein catabolic process-IBA;hydrolase activity-IEA \\ GO:0004190;GO:0006508;GO:0030…
TRINITY_DN6392_c0_g1	FvH4_6g15140.1	0.31725	1.45525	1.138	4.58708	0.00671625	0.461435	---NA---
TRINITY_DN3423_c1_g2	FvH4_6g23830.1	0.2265	1.0365	0.81	4.57616	3.8484e-05	0.0236171	LEAF RUST 10 DISEASE-RESISTANCE LOCUS RECEPTOR-LIKE PROTEIN KINASE-like 2.2 \\ 0.00E+00 \\ 74.64 % \\ GO:0016020-IEA;GO:0016021-IEA;GO:0016310-IEA;GO:0004672-IEA;GO:0030247-IEA;GO:0016301-IEA;GO:0008889-IEA;GO:0005524-IEA;GO:0016787-IEA;GO:0006468-IEA \\ membrane-IEA;integral component of membrane-IEA;phosphorylation-IEA;protein kinase activity-IEA;polysaccharide binding-IEA;kinase activity-IEA;g…		Protein kinase domain
TRINITY_DN18312_c0_g1	FvH4_5g09990.1	0.55875	2.5235	1.96475	4.51633	0.00015808	0.0528415	germin-like protein subfamily 3 member 4 \\ 2.80E-94 \\ 64.82 %		Germin
TRINITY_DN324184_c0_g1	FvH4_4g05460.1	0.501	2.25475	1.75375	4.5005	0.00579424	0.422772	dirigent protein 18-like \\ 5.20E-15 \\ 91.89 % \\ GO:0000398-IEA;GO:0003723-IEA;GO:0008380-IEA;GO:0005681-IEA;GO:0016020-IEA;GO:0016021-IEA;GO:0006397-IEA;GO:0005634-IEA;GO:0005732-IEA \\ mRNA splicing, via spliceosome-IEA;RNA binding-IEA;RNA splicing-IEA;spliceosomal complex-IEA;membrane-IEA;integral component of membrane-IEA;mRNA processing-IEA;nucleus-IEA;small nucleolar ribonucleoprotein com…		Dirigent protein
TRINITY_DN5321_c0_g1	FvH4_6g05200.1	0.31775	1.42575	1.108	4.48702	0.00184379	0.213911	protein DMP10-like \\ 2.10E-10 \\ 89.19 %		Protein DMP
TRINITY_DN2296_c0_g3	FvH4_5g03870.1	2.1665	9.6535	7.487	4.4558	0.00183243	0.213106	2-alkenal reductase (NADP(+)-dependent)-like \\ 0.00E+00 \\ 92.22 % \\ GO:0016491-IEA;GO:0055114-IEA \\ oxidoreductase activity-IEA;oxidation-reduction process-IEA \\ GO:0016491;GO:0055114 \\ oxidoreductase activity;oxidation-reduction process		GroES-like superfamily
TRINITY_DN413_c0_g1	FvH4_7g08040.1	5.99075	26.6002	20.6095	4.44022	0.000786296	0.129855	pentatricopeptide repeat-containing protein At4g21880, mitochondrial-like isoform X4 \\ 0.00E+00 \\ 88.91 %		Pentatricopeptide repeat
TRINITY_DN9784_c0_g1	FvH4_3g41070.1	0.4785	2.124	1.6455	4.43887	0.00607949	0.43469	RNA-binding protein 1 isoform X3 \\ 0.00E+00 \\ 83.89 % \\ GO:0008541-IEA;GO:0008541-IBA;GO:0050790-IEA;GO:0042176-IEA;GO:0030234-IEA;GO:0000502-IEA;GO:0006511-IBA \\ proteasome regulatory particle, lid subcomplex-IEA;proteasome regulatory particle, lid subcomplex-IBA;regulation of catalytic activity-IEA;regulation of protein catabolic process-IEA;enzyme regulator activity-IEA;proteasome complex-…		RNA recognition motif domain
TRINITY_DN24502_c0_g1	FvH4_5g32790.1	0.33125	1.4655	1.13425	4.42415	0.0016488	0.200689	protein trichome birefringence-like 43 \\ 2.10E-100 \\ 96.75 %		PMR5 N-terminal domain
TRINITY_DN3498_c1_g1	FvH4_2g31650.1	8.7305	38.5748	29.8443	4.41839	9.97997e-05	0.0408671	protein IQ-DOMAIN 1 \\ 0.00E+00 \\ 87.33 % \\ GO:0005506-IEA;GO:0046872-IEA;GO:0016491-IEA;GO:0016705-IEA;GO:0016020-IEA;GO:0016021-IEA;GO:0020037-IEA;GO:0055114-IEA;GO:0004497-IEA;GO:0005634-IEA \\ iron ion binding-IEA;metal ion binding-IEA;oxidoreductase activity-IEA;oxidoreductase activity, acting on paired donors, with incorporation or reduction of molecular oxygen-IEA;membrane-IEA;integral c…		IQ motif, EF-hand binding site
TRINITY_DN328707_c0_g1	FvH4_1g09300.1	6.274	27.7138	21.4398	4.41724	6.66387e-05	0.0323861	auxin-responsive protein SAUR50-like \\ 3.40E-37 \\ 89.91 % \\ GO:0016020-IEA;GO:0016021-IEA \\ membrane-IEA;integral component of membrane-IEA \\ GO:0016021 \\ integral component of membrane		Small auxin-up RNA
TRINITY_DN8878_c1_g1	FvH4_1g01650.1	0.2315	1.0175	0.786	4.39525	0.00561916	0.41533	hypothetical protein RchiOBHm_Chr2g0086601 \\ 1.80E-49 \\ 74.62 % \\ GO:0016020-IEA;GO:0016021-IEA \\ membrane-IEA;integral component of membrane-IEA \\ GO:0016021 \\ integral component of membrane
TRINITY_DN9045_c0_g1	FvH4_7g15910.1	5.19725	22.7707	17.5735	4.38131	0.0211161	0.915584	arabinogalactan peptide 16 \\ 0.00E+00 \\ 81.35 % \\ GO:0016757-IEA;GO:0016757-IBA;GO:0006493-IBA;GO:0016740-IEA \\ transferase activity, transferring glycosyl groups-IEA;transferase activity, transferring glycosyl groups-IBA;protein O-linked glycosylation-IBA;transferase activity-IEA \\ GO:0006493;GO:0016757 \\ protein O-linked glycosylation;transferase activity, transferring glycosyl groups
TRINITY_DN6590_c0_g1	FvH4_4g27020.1	1.33	5.78475	4.45475	4.34944	0.000273097	0.0712388	zinc finger protein GIS3 \\ 1.00E-77 \\ 91.18 % \\ GO:0005739-IEA;GO:0005524-IEA \\ mitochondrion-IEA;ATP binding-IEA \\ GO:0005524;GO:0005739 \\ ATP binding;mitochondrion		Zinc finger C2H2-type
TRINITY_DN114_c0_g1	FvH4_6g01690.1	0.9645	4.17925	3.21475	4.33307	0.00014059	0.049187	TMV resistance protein N-like isoform X1 \\ 0.00E+00 \\ 66.54 % \\ GO:0003677-IEA;GO:0003700-IEA;GO:0007165-IEA;GO:0006355-IEA;GO:0043531-IEA;GO:0043565-IEA;GO:0005634-IEA \\ DNA binding-IEA;DNA-binding transcription factor activity-IEA;signal transduction-IEA;regulation of transcription, DNA-templated-IEA;ADP binding-IEA;sequence-specific DNA binding-IEA;nucleus-IEA \\ GO:0097159;GO:1901363 \\ o…		Toll/interleukin-1 receptor homology (TIR) domain
TRINITY_DN1178_c0_g1	FvH4_3g14550.1	1.5065	6.4775	4.971	4.2997	2.04719e-05	0.0164668	metal tolerance protein 10 \\ 1.70E-35 \\ 54.67 % \\ GO:0016888-IEA;GO:0006259-IEA \\ endodeoxyribonuclease activity, producing 5'-phosphomonoesters-IEA;DNA metabolic process-IEA		Cation efflux protein
TRINITY_DN4568_c0_g1	FvH4_2g06070.1	0.7925	3.398	2.6055	4.2877	8.4884e-06	0.010255	putative F-box domain, leucine-rich repeat domain, L domain-containing protein \\ 0.00E+00 \\ 58.42 %		F-box domain
TRINITY_DN5194_c0_g1	FvH4_1g04240.1	1.4765	6.32325	4.84675	4.28259	0.000388736	0.0890913	auxin-responsive protein IAA1-like		PB1 domain
TRINITY_DN8216_c0_g1	FvH4_5g24460.1	0.319	1.35275	1.03375	4.2406	0.000460346	0.0969014	carbon catabolite repressor protein 4 homolog 4 isoform X1 \\ 0.00E+00 \\ 95.62 % \\ GO:0005834-IEA;GO:0001664-IEA;GO:0005515-IPI;GO:0005525-IEA;GO:0000166-IEA;GO:0007165-IEA;GO:0003924-IEA;GO:0019001-IEA;GO:0007186-IEA;GO:0031683-IEA;GO:0005575-ND \\ heterotrimeric G-protein complex-IEA;G protein-coupled receptor binding-IEA;protein binding-IPI;GTP binding-IEA;nucleotide binding-IEA;signal trans…	CCR4-NOT transcription complex subunit 6 [EC:3.1.13.4]	Endonuclease/exonuclease/phosphatase
TRINITY_DN6707_c0_g1	FvH4_3g45420.1	1.2795	5.4225	4.143	4.23798	0.0203184	0.894085	probable LRR receptor-like serine/threonine-protein kinase At4g36180 isoform X1 \\ 0.00E+00 \\ 70.08 % \\ GO:0016020-IEA;GO:0016021-IEA \\ membrane-IEA;integral component of membrane-IEA		Leucine-rich repeat
TRINITY_DN11284_c0_g1	FvH4_2g30040.1	0.40625	1.70725	1.301	4.20246	0.0166508	0.793934	gibberellin 3-beta-dioxygenase 1-like	gibberellin 3-beta-dioxygenase [EC:1.14.11.15]	Oxoglutarate/iron-dependent dioxygenase
TRINITY_DN1992_c0_g1	FvH4_7g27420.1	1.68325	7.02625	5.343	4.17422	0.00270039	0.271245	---NA--- \\ 0.00E+00 \\ 80.07 % \\ GO:0000210-IEA;GO:0016787-IEA \\ NAD+ diphosphatase activity-IEA;hydrolase activity-IEA \\ GO:0000210 \\ NAD+ diphosphatase activity
TRINITY_DN293_c0_g4	FvH4_3g14030.1	0.7505	3.12625	2.37575	4.16556	0.00127498	0.172576	organic cation/carnitine transporter 3-like \\ 0.00E+00 \\ 77.30 % \\ GO:0055085-IEA;GO:0016020-IEA;GO:0016021-IEA;GO:0008643-IEA;GO:0022857-IEA;GO:0005215-IEA \\ transmembrane transport-IEA;membrane-IEA;integral component of membrane-IEA;carbohydrate transport-IEA;transmembrane transporter activity-IEA;transporter activity-IEA \\ GO:0008643;GO:0016021;GO:0022857;GO:0055085 \\ carbohydrate transp…		Major facilitator, sugar transporter-like
TRINITY_DN135233_c0_g1	FvH4_2g08530.1	4.304	17.8585	13.5545	4.14928	0.00147285	0.188188	BURP domain protein USPL1-like \\ 5.00E-177 \\ 84.79 %		BURP domain
TRINITY_DN1428_c0_g1	FvH4_7g26710.1	0.4625	1.88925	1.42675	4.08486	0.00236869	0.249462	ATP-dependent DNA helicase SRS2-like protein At4g25120 \\ 0.00E+00 \\ 80.90 % \\ GO:0003677-IEA;GO:0032508-IEA;GO:0003678-IEA;GO:0036292-IEA;GO:0004386-IEA;GO:0006310-IEA;GO:0004003-IEA;GO:0043138-IEA;GO:0005524-IEA;GO:0016787-IEA \\ DNA binding-IEA;DNA duplex unwinding-IEA;DNA helicase activity-IEA;DNA rewinding-IEA;helicase activity-IEA;DNA recombination-IEA;ATP-dependent DNA helicase activity-…		DNA helicase, UvrD/REP type
TRINITY_DN2212_c2_g1	FvH4_6g35410.1	4.75275	19.0715	14.3187	4.01273	0.00013555	0.0486135	auxin-responsive protein SAUR50 \\ 4.30E-154 \\ 83.83 % \\ GO:0003677-IEA;GO:0007165-IEA;GO:0043531-IEA;GO:0016787-IEA \\ DNA binding-IEA;signal transduction-IEA;ADP binding-IEA;hydrolase activity-IEA \\ GO:0003677;GO:0007165;GO:0016787;GO:0043531 \\ DNA binding;signal transduction;hydrolase activity;ADP binding		Small auxin-up RNA
TRINITY_DN14622_c0_g1	FvH4_6g41190.1	0.424	1.6965	1.2725	4.00118	0.0340776	0.929067	glucan endo-1,3-beta-glucosidase 4-like \\ 3.70E-40 \\ 92.48 % \\ GO:0016491-IEA;GO:0055114-IEA;GO:0008168-IEA;GO:0032259-IEA \\ oxidoreductase activity-IEA;oxidation-reduction process-IEA;methyltransferase activity-IEA;methylation-IEA \\ GO:0008168;GO:0016491;GO:0032259;GO:0055114 \\ methyltransferase activity;oxidoreductase activity;methylation;oxidation-reduction process		X8 domain
TRINITY_DN640_c0_g1	FvH4_5g24540.1	0.52625	2.09725	1.571	3.98527	0.00104793	0.153232	---NA---	lysine-specific demethylase 3 [EC:1.14.11.-]	JmjC domain
TRINITY_DN512_c0_g1	FvH4_5g17220.1	5.22575	20.778	15.5522	3.97608	0.00116605	0.163766	(R,S)-reticuline 7-O-methyltransferase-like \\ 1.90E-116 \\ 70.18 % \\ GO:0016020-IEA;GO:0016021-IEA \\ membrane-IEA;integral component of membrane-IEA \\ GO:0016020 \\ membrane		O-methyltransferase, family 2
TRINITY_DN1768_c0_g3	FvH4_7g33610.1	3.00525	11.8818	8.8765	3.95366	7.92885e-05	0.0355561	PREDICTED: uncharacterized protein LOC105353121 \\ 0.00E+00 \\ 84.85 % \\ GO:0003677-IEA;GO:0003700-IEA;GO:0000165-IEA;GO:0004713-IEA;GO:0000186-IEA;GO:0004709-IEA;GO:0016310-IEA;GO:0016740-IEA;GO:0016301-IEA;GO:0016787-IEA;GO:0018108-IEA;GO:0007165-IEA;GO:0043531-IEA;GO:0006355-IEA;GO:0004672-IEA;GO:0043565-IEA;GO:0005634-IEA;GO:0005524-IEA;GO:0005622-IEA;GO:0006468-IEA \\ DNA binding-IEA;DNA-bi…
TRINITY_DN263161_c0_g1	FvH4_3g34010.1	17.0702	67.3803	50.31	3.94723	0.00983297	0.579537	hypothetical protein RchiOBHm_Chr5g0061631 \\ 5.80E-25 \\ 55.60 % \\ GO:0016491-IEA;GO:0008177-IEA;GO:0016020-IEA;GO:0016021-IEA;GO:0055114-IEA \\ oxidoreductase activity-IEA;succinate dehydrogenase (ubiquinone) activity-IEA;membrane-IEA;integral component of membrane-IEA;oxidation-reduction process-IEA
TRINITY_DN4148_c0_g1	FvH4_4g18540.1	0.498	1.9645	1.4665	3.94478	0.000463578	0.097156	DUF581 family protein \\ 1.50E-17 \\ 72.54 %		Zf-FLZ domain
TRINITY_DN8026_c0_g1	FvH4_2g15880.1	0.76175	3.002	2.24025	3.94093	0.0157757	0.768626	(RS)-norcoclaurine 6-O-methyltransferase-like \\ 3.60E-178 \\ 89.08 % \\ GO:0008171-IEA;GO:0046983-IEA;GO:0008168-IEA;GO:0016740-IEA;GO:0032259-IEA \\ O-methyltransferase activity-IEA;protein dimerization activity-IEA;methyltransferase activity-IEA;transferase activity-IEA;methylation-IEA \\ GO:0008171;GO:0032259;GO:0046983 \\ O-methyltransferase activity;methylation;protein dimerization activity		O-methyltransferase, family 2
TRINITY_DN4295_c0_g1	FvH4_3g17090.1	0.7245	2.8545	2.13	3.93996	0.000140234	0.0491489	putative F-box/LRR-repeat protein At5g41840 \\ 0.00E+00 \\ 67.06 %		F-box domain
TRINITY_DN12_c2_g1	FvH4_5g37140.1	0.42175	1.65725	1.2355	3.92946	2.82444e-05	0.0199057	putative nucleotidyltransferase, Ribonuclease H \\ 0.00E+00 \\ 70.18 % \\ GO:0004190-IEA;GO:0016779-IEA;GO:0090502-IEA;GO:0008270-IEA;GO:0006508-IEA;GO:0015074-IEA;GO:0016740-IEA;GO:0016787-IEA;GO:0004523-IEA;GO:0005634-IEA;GO:0003676-IEA \\ aspartic-type endopeptidase activity-IEA;nucleotidyltransferase activity-IEA;RNA phosphodiester bond hydrolysis, endonucleolytic-IEA;zinc ion binding-IEA;pro…		MAGE homology domain
TRINITY_DN38091_c0_g1	FvH4_1g01610.1	0.30675	1.20275	0.896	3.92095	0.0044866	0.365271	---NA---
TRINITY_DN6838_c0_g1	FvH4_1g18480.1	0.57525	2.24825	1.673	3.9083	0.000279861	0.0720273	F-box protein CPR30-like \\ 0.00E+00 \\ 56.76 %		F-box domain
TRINITY_DN1856_c0_g1	FvH4_7g28790.1	1.37175	5.31225	3.9405	3.87261	1.3704e-05	0.0132261	putative F-box domain-containing protein \\ 0.00E+00 \\ 87.47 % \\ GO:0016746-IEA;GO:0016740-IEA;GO:0004026-IEA \\ transferase activity, transferring acyl groups-IEA;transferase activity-IEA;alcohol O-acetyltransferase activity-IEA \\ GO:0004026 \\ alcohol O-acetyltransferase activity		Domain unknown function DUF295
TRINITY_DN4636_c0_g3	FvH4_6g03250.1	0.3575	1.3675	1.01	3.82517	0.00346605	0.312859	TMV resistance protein N-like \\ 0.00E+00 \\ 63.29 % \\ GO:0003677-IEA;GO:0007165-IEA;GO:0016020-IEA;GO:0016021-IEA;GO:0043531-IEA \\ DNA binding-IEA;signal transduction-IEA;membrane-IEA;integral component of membrane-IEA;ADP binding-IEA		Toll/interleukin-1 receptor homology (TIR) domain
TRINITY_DN8478_c0_g1	FvH4_7g24860.1	0.92225	3.5275	2.60525	3.82488	0.00759205	0.496743	PREDICTED: uncharacterized protein LOC101310353 \\ 5.90E-103 \\ 64.44 % \\ GO:0003700-IEA;GO:0006355-IEA \\ DNA-binding transcription factor activity-IEA;regulation of transcription, DNA-templated-IEA
TRINITY_DN10601_c0_g2	FvH4_1g19480.1	6.141	23.4875	17.3465	3.8247	0.00106654	0.154688	UDP-glycosyltransferase 91A1-like \\ 0.00E+00 \\ 82.83 % \\ GO:0016757-IEA;GO:0016758-IEA;GO:0016020-IEA;GO:0016021-IEA;GO:0016740-IEA;GO:0102241-IEA \\ transferase activity, transferring glycosyl groups-IEA;transferase activity, transferring hexosyl groups-IEA;membrane-IEA;integral component of membrane-IEA;transferase activity-IEA;soyasaponin III rhamnosyltransferase activity-IEA \\ GO:0016021;…		UDP-glucuronosyl/UDP-glucosyltransferase
TRINITY_DN5029_c0_g2	FvH4_3g03410.1	0.27775	1.0575	0.77975	3.80738	0.00126188	0.17174	G-type lectin S-receptor-like serine/threonine-protein kinase RKS1 isoform X1 \\ 0.00E+00 \\ 70.63 % \\ GO:0000166-IEA;GO:0048544-IEA;GO:0016020-IEA;GO:0016021-IEA;GO:0016310-IEA;GO:0004672-IEA;GO:0016740-IEA;GO:0016301-IEA;GO:0004674-IEA;GO:0005524-IEA;GO:0006468-IEA \\ nucleotide binding-IEA;recognition of pollen-IEA;membrane-IEA;integral component of membrane-IEA;phosphorylation-IEA;protein ki…		Protein kinase domain
TRINITY_DN11877_c0_g1	FvH4_7g11720.1	1.226	4.64775	3.42175	3.79099	0.000434925	0.0938944	myeloid leukemia factor 1 isoform X1 \\ 0.00E+00 \\ 55.79 % \\ GO:0016020-IEA;GO:0016021-IEA \\ membrane-IEA;integral component of membrane-IEA		Myeloid leukemia factor
TRINITY_DN2184_c0_g1	FvH4_4g23230.1	10.56	39.8953	29.3353	3.77796	0.00253053	0.260034	auxin-responsive protein SAUR32-like \\ 0.00E+00 \\ 72.29 % \\ GO:0016702-IBA;GO:0051213-IEA;GO:0016491-IEA;GO:0055114-IEA \\ oxidoreductase activity, acting on single donors with incorporation of molecular oxygen, incorporation of two atoms of oxygen-IBA;dioxygenase activity-IEA;oxidoreductase activity-IEA;oxidation-reduction process-IEA \\ GO:0016702;GO:0055114 \\ oxidoreductase activity, actin…		Small auxin-up RNA
TRINITY_DN1372_c0_g2	FvH4_3g14950.1	1.97575	7.45775	5.482	3.77464	0.000239506	0.0664727	F-box protein CPR1-like		F-box domain
TRINITY_DN2231_c0_g2	FvH4_3g26460.1	10.4582	39.4052	28.947	3.76786	0.000105778	0.0426532	hypothetical protein RchiOBHm_Chr6g0251851 \\ 0.00E+00 \\ 86.79 % \\ GO:0000287-IEA;GO:0004634-IEA;GO:0005737-IEA;GO:0046872-IEA;GO:0016020-IEA;GO:0005829-IEA;GO:0001917-IEA;GO:0043209-IEA;GO:0006096-IEA;GO:0043025-IEA;GO:0043204-IEA;GO:0000015-IEA;GO:0005886-IEA;GO:0005622-IEA \\ magnesium ion binding-IEA;phosphopyruvate hydratase activity-IEA;cytoplasm-IEA;metal ion binding-IEA;membrane-IEA;cyt…
TRINITY_DN5518_c0_g2	FvH4_3g33990.1	0.27925	1.038	0.75875	3.7171	1.01459e-05	0.0108882	DNA repair protein RAD51 homolog 2 isoform X1 \\ 0.00E+00 \\ 90.62 % \\ GO:0003677-IEA;GO:0006281-IEA;GO:0047693-IEA;GO:0033063-IEA;GO:0008094-IEA;GO:0000724-IEA;GO:0005524-IEA;GO:0016787-IEA \\ DNA binding-IEA;DNA repair-IEA;ATP diphosphatase activity-IEA;Rad51B-Rad51C-Rad51D-XRCC2 complex-IEA;DNA-dependent ATPase activity-IEA;double-strand break repair via homologous recombination-IEA;ATP bindi…		AAA+ ATPase domain
TRINITY_DN224_c0_g1	FvH4_3g17500.1	10.425	38.696	28.271	3.71185	0.0287481	0.929067	alpha-amylase/subtilisin inhibitor-like \\ 8.70E-42 \\ 61.82 % \\ GO:0005524-IEA \\ ATP binding-IEA		Proteinase inhibitor I3, Kunitz legume
TRINITY_DN5072_c0_g2	FvH4_1g22280.1	3.567	13.2105	9.6435	3.70353	0.000345041	0.0824645	---NA---		DNA-binding pseudobarrel domain superfamily
TRINITY_DN5931_c0_g1	FvH4_3g11150.1	0.78725	2.90625	2.119	3.69165	0.0180426	0.83359	uncharacterized oxidoreductase C663.09c \\ 5.50E-70 \\ 65.75 % \\ GO:0016491-IEA;GO:0102306-IEA;GO:0055114-IEA \\ oxidoreductase activity-IEA;benzil reductase [(S)-benzoin-forming] activity-IEA;oxidation-reduction process-IEA		Short-chain dehydrogenase/reductase SDR
TRINITY_DN3199_c0_g1	FvH4_6g48100.1	2.60675	9.48925	6.8825	3.64026	6.62105e-05	0.0322955	---NA---
TRINITY_DN1641_c1_g1	FvH4_5g34350.1	3.97775	14.4225	10.4447	3.62579	0.000273065	0.0712388	PREDICTED: uncharacterized protein LOC101308410 \\ 8.70E-16 \\ 55.26 % \\ GO:0016020-IEA;GO:0016021-IEA \\ membrane-IEA;integral component of membrane-IEA
TRINITY_DN1124_c0_g1	FvH4_3g42450.1	0.53275	1.93075	1.398	3.62412	0.000165623	0.0539361	putative F-box domain-containing protein \\ 0.00E+00 \\ 70.93 %		F-box domain
TRINITY_DN414_c0_g3	FvH4_4g09090.1	1.66125	6.0145	4.35325	3.62047	0.00964173	0.573267	---NA--- \\ 0.00E+00 \\ 76.08 % \\ GO:0006281-IEA;GO:0006281-IBA;GO:2001022-IBA;GO:0030915-IEA;GO:0030915-IBA;GO:0005634-IEA;GO:0005634-IBA \\ DNA repair-IEA;DNA repair-IBA;positive regulation of response to DNA damage stimulus-IBA;Smc5-Smc6 complex-IEA;Smc5-Smc6 complex-IBA;nucleus-IEA;nucleus-IBA \\ GO:0005634;GO:0006281;GO:0030915;GO:2001022 \\ nucleus;DNA repair;Smc5-Smc6 complex;positive reg…
TRINITY_DN358_c0_g2	FvH4_2g01950.1	0.809	2.9225	2.1135	3.61248	0.000944386	0.1441	nucleoporin NUP188 homolog \\ 0.00E+00 \\ 83.35 % \\ GO:0006913-IEA;GO:0017056-IEA;GO:0005622-IEA \\ nucleocytoplasmic transport-IEA;structural constituent of nuclear pore-IEA;intracellular-IEA \\ GO:0005622;GO:0006913;GO:0017056 \\ intracellular;nucleocytoplasmic transport;structural constituent of nuclear pore	nuclear pore complex protein Nup188	Armadillo-like helical
TRINITY_DN11_c0_g2	FvH4_6g31340.1	1.24875	4.4995	3.25075	3.6032	0.0483713	0.929067	protein SRC2 \\ 5.40E-93 \\ 88.83 % \\ GO:0016020-IEA;GO:0016021-IEA \\ membrane-IEA;integral component of membrane-IEA \\ GO:0016021 \\ integral component of membrane
TRINITY_DN168011_c0_g1	FvH4_4g14940.1	8.99925	32.4017	23.4025	3.60049	5.02959e-05	0.0279183	protein FANTASTIC FOUR 3 \\ 0.00E+00 \\ 80.25 % \\ GO:0004672-IEA;GO:0016740-IEA;GO:0005524-IEA;GO:0006468-IEA \\ protein kinase activity-IEA;transferase activity-IEA;ATP binding-IEA;protein phosphorylation-IEA \\ GO:0004672;GO:0005524;GO:0006468 \\ protein kinase activity;ATP binding;protein phosphorylation		The fantastic four family
TRINITY_DN1496_c0_g1	FvH4_5g07030.1	43.5263	156.489	112.963	3.59527	0.00124997	0.170712	probable UDP-N-acetylglucosamine--peptide N-acetylglucosaminyltransferase SPINDLY \\ 0.00E+00 \\ 82.67 % \\ GO:0016757-IEA;GO:0016740-IEA \\ transferase activity, transferring glycosyl groups-IEA;transferase activity-IEA \\ GO:0016757 \\ transferase activity, transferring glycosyl groups		Tetratricopeptide-like helical domain superfamily
TRINITY_DN28713_c0_g2	FvH4_2g29260.1	0.34375	1.23525	0.8915	3.59345	0.0189001	0.855018	GTP-binding protein At3g49725, chloroplastic
TRINITY_DN3779_c0_g1	FvH4_4g09210.1	0.9945	3.5695	2.575	3.58924	5.29932e-05	0.0288949	uncharacterized protein LOC112194380 \\ 0.00E+00 \\ 74.55 %
TRINITY_DN412_c0_g1	FvH4_7g17420.1	0.8615	3.08425	2.22275	3.58009	0.00541524	0.407294	putative ATP-synthase-associated protein \\ 5.40E-36 \\ 89.80 %		Putative ATP-synthase-associated protein
TRINITY_DN15363_c0_g1	FvH4_2g09420.1	0.64575	2.307	1.66125	3.57259	0.000279799	0.0720273	phosphatidylinositol/phosphatidylcholine transfer protein SFH1-like isoform X2 \\ 0.00E+00 \\ 89.27 %		CRAL-TRIO lipid binding domain
TRINITY_DN3857_c0_g1	FvH4_6g05060.1	0.74275	2.641	1.89825	3.55571	0.000186319	0.0578427	putative major facilitator, sugar transporter, major facilitator superfamily \\ 0.00E+00 \\ 87.53 % \\ GO:0055085-IEA;GO:0016020-IEA;GO:0016021-IEA;GO:0008643-IEA;GO:0022857-IEA \\ transmembrane transport-IEA;membrane-IEA;integral component of membrane-IEA;carbohydrate transport-IEA;transmembrane transporter activity-IEA \\ GO:0008643;GO:0016021;GO:0022857;GO:0055085 \\ carbohydrate transport;int…		Sugar/inositol transporter
TRINITY_DN1632_c0_g2	FvH4_2g13000.1	0.34975	1.23975	0.89	3.54467	0.000494179	0.10049	putative pentatricopeptide repeat-containing protein At1g12700, mitochondrial \\ 3.20E-113 \\ 78.84 % \\ GO:0016779-IEA;GO:0090502-IEA;GO:0016491-IEA;GO:0008177-IEA;GO:0055114-IEA;GO:0016740-IEA;GO:0016787-IEA;GO:0004523-IEA \\ nucleotidyltransferase activity-IEA;RNA phosphodiester bond hydrolysis, endonucleolytic-IEA;oxidoreductase activity-IEA;succinate dehydrogenase (ubiquinone) activity-IEA;o…
TRINITY_DN2831_c0_g1	FvH4_5g10540.1	0.49025	1.734	1.24375	3.53697	0.00749459	0.492504	peroxiredoxin-2F, mitochondrial \\ 4.20E-120 \\ 69.09 %
TRINITY_DN29480_c0_g1	FvH4_4g29530.1	2.87725	10.1288	7.2515	3.52029	0.00994772	0.584289	glycine-rich RNA-binding protein 8-like
TRINITY_DN2166_c0_g1	FvH4_3g35480.1	30.988	107.907	76.9188	3.48221	6.00713e-05	0.0303543	ACT domain-containing protein ACR9-like \\ 0.00E+00 \\ 87.25 %		ACT domain
TRINITY_DN335_c0_g4	FvH4_5g25060.1	0.403	1.4015	0.9985	3.47767	0.00946563	0.566805	PREDICTED: uncharacterized protein LOC101303230 \\ 4.50E-19 \\ 82.31 %		WD40/YVTN repeat-like-containing domain superfamily
TRINITY_DN6487_c0_g2	FvH4_7g32220.1	8.062	28.0115	19.9495	3.47451	0.00383808	0.332962	protein yippee-like At4g27740 \\ 3.20E-72 \\ 60.88 % \\ GO:0008150-ND;GO:0016020-IEA;GO:0016021-IEA;GO:0005575-ND;GO:0006777-IEA;GO:0003674-ND \\ biological_process-ND;membrane-IEA;integral component of membrane-IEA;cellular_component-ND;Mo-molybdopterin cofactor biosynthetic process-IEA;molecular_function-ND \\ GO:0016021 \\ integral component of membrane		Yippee/Mis18/Cereblon
TRINITY_DN586_c1_g1	FvH4_5g39080.1	0.712	2.46975	1.75775	3.46875	0.0083647	0.525466	DELLA protein RGL1-like \\ 0.00E+00 \\ 73.54 % \\ GO:0003700-IBA;GO:0006355-IEA;GO:0043565-IBA;GO:0005634-IBA \\ DNA-binding transcription factor activity-IBA;regulation of transcription, DNA-templated-IEA;sequence-specific DNA binding-IBA;nucleus-IBA		Transcription factor GRAS
TRINITY_DN8199_c0_g1	FvH4_7g17380.1	4.87875	16.8685	11.9897	3.45755	0.00934629	0.563143	transcription factor MYC2 \\ 0.00E+00 \\ 75.92 % \\ GO:0003677-IEA;GO:0046983-IEA \\ DNA binding-IEA;protein dimerization activity-IEA \\ GO:0046983 \\ protein dimerization activity	transcription factor MYC2	Myc-type, basic helix-loop-helix (bHLH) domain
TRINITY_DN1359_c0_g2	FvH4_6g42670.1	0.632	2.18	1.548	3.44937	0.00016082	0.0532089	CSC1-like protein At3g21620 \\ 0.00E+00 \\ 94.42 % \\ GO:0016020-IEA;GO:0034220-IEA;GO:0016021-IEA;GO:0005227-IBA;GO:0005886-IBA \\ membrane-IEA;ion transmembrane transport-IEA;integral component of membrane-IEA;calcium activated cation channel activity-IBA;plasma membrane-IBA \\ GO:0005227;GO:0005886;GO:0016021;GO:0034220 \\ calcium activated cation channel activity;plasma membrane;integral comp…		Acid phosphatase/vanadium-dependent haloperoxidase-related
TRINITY_DN9096_c3_g1	FvH4_6g04760.1	1.8575	6.398	4.5405	3.44441	0.000102475	0.0416486	dnaJ homolog subfamily B member 4-like \\ 0.00E+00 \\ 66.79 %		DnaJ domain
TRINITY_DN12487_c0_g1	FvH4_1g07090.1	0.3745	1.28425	0.90975	3.42924	0.0187464	0.850545	pollen-specific protein SF21-like \\ 0.00E+00 \\ 92.46 % \\ GO:0016787-IEA \\ hydrolase activity-IEA \\ GO:0016787 \\ hydrolase activity		NDRG
TRINITY_DN37710_c0_g1	FvH4_5g21990.1	1.107	3.79325	2.68625	3.4266	0.000107322	0.0430503	Auxin responsive SAUR protein \\ 2.90E-83 \\ 84.67 % \\ GO:0009733-IEA \\ response to auxin-IEA \\ GO:0009733 \\ response to auxin
TRINITY_DN3286_c0_g1	FvH4_6g26980.1	1.24375	4.255	3.01125	3.42111	1.92702e-05	0.0160448	DNA-directed RNA polymerases I and III subunit RPAC2 \\ 2.10E-109 \\ 88.20 % \\ GO:0003677-IEA;GO:0003700-IEA;GO:0003700-IBA;GO:0006351-IEA;GO:0003680-IEA;GO:0003680-IBA;GO:0006355-IEA;GO:0010228-IBA;GO:0005634-IEA;GO:0005634-IBA \\ DNA binding-IEA;DNA-binding transcription factor activity-IEA;DNA-binding transcription factor activity-IBA;transcription, DNA-templated-IEA;AT DNA binding-IEA;AT DNA…	DNA-directed RNA polymerases I and III subunit RPAC2	DNA-directed RNA polymerase, RBP11-like dimerisation domain
TRINITY_DN142_c1_g2	FvH4_2g00810.1	0.71275	2.435	1.72225	3.41635	0.000425257	0.0927824	PREDICTED: uncharacterized protein LOC101303467 \\ 6.60E-124 \\ 87.12 %		Protein of unknown function DUF1517
TRINITY_DN6586_c0_g1	FvH4_4g16900.1	0.45375	1.54425	1.0905	3.40331	0.0166377	0.793558	sugar transporter ERD6-like 16 \\ 0.00E+00 \\ 93.58 % \\ GO:0055085-IEA;GO:0016020-IEA;GO:0016021-IEA;GO:0008643-IEA;GO:0022857-IEA;GO:0005215-IEA \\ transmembrane transport-IEA;membrane-IEA;integral component of membrane-IEA;carbohydrate transport-IEA;transmembrane transporter activity-IEA;transporter activity-IEA \\ GO:0008643;GO:0016021;GO:0022857;GO:0055085 \\ carbohydrate transport;integral …		Sugar/inositol transporter
TRINITY_DN2092_c1_g2	FvH4_2g27180.1	9.12575	30.8405	21.7147	3.3795	0.00105964	0.154273	two-component response regulator ORR9-like isoform X1		Signal transduction response regulator, receiver domain
TRINITY_DN9231_c0_g1	FvH4_6g08920.1	0.73	2.467	1.737	3.37945	0.0262388	0.929067	chaperone protein DnaJ \\ 2.30E-06 \\ 88.75 % \\ GO:0042803-IEA;GO:0005759-IEA;GO:0009507-IBA;GO:0005739-IEA;GO:0051087-IEA;GO:0050790-IEA;GO:0051082-IBA;GO:0000774-IEA;GO:0000774-IBA;GO:0006457-IEA \\ protein homodimerization activity-IEA;mitochondrial matrix-IEA;chloroplast-IBA;mitochondrion-IEA;chaperone binding-IEA;regulation of catalytic activity-IEA;unfolded protein binding-IBA;adenyl-nucle…	molecular chaperone DnaJ	DnaJ domain
TRINITY_DN333_c1_g1	FvH4_3g34610.1	0.504	1.69825	1.19425	3.36954	0.0373605	0.929067	probable LRR receptor-like serine/threonine-protein kinase At1g05700 \\ 0.00E+00 \\ 75.43 % \\ GO:0016020-IEA;GO:0016021-IEA;GO:0016310-IEA;GO:0016740-IEA;GO:0016301-IEA \\ membrane-IEA;integral component of membrane-IEA;phosphorylation-IEA;transferase activity-IEA;kinase activity-IEA \\ GO:0016021;GO:0016740 \\ integral component of membrane;transferase activity		Malectin-like carbohydrate-binding domain
TRINITY_DN6577_c0_g1	FvH4_6g53140.1	1.251	4.202	2.951	3.35891	0.0028052	0.276897	UPF0481 protein At3g47200-like \\ 0.00E+00 \\ 67.70 %		Protein kinase domain
TRINITY_DN1979_c0_g1	FvH4_1g19590.1	2.43875	8.17575	5.737	3.35243	0.000817317	0.132591	nucleobase-ascorbate transporter 11 \\ 0.00E+00 \\ 95.72 % \\ GO:0055085-IEA;GO:0016020-IEA;GO:0016021-IEA;GO:0022857-IEA \\ transmembrane transport-IEA;membrane-IEA;integral component of membrane-IEA;transmembrane transporter activity-IEA \\ GO:0016021;GO:0022857;GO:0055085 \\ integral component of membrane;transmembrane transporter activity;transmembrane transport		Xanthine/uracil/vitamin C permease
TRINITY_DN11764_c0_g1	FvH4_3g43930.1	0.32725	1.0945	0.76725	3.34454	0.00270647	0.271768	probable disease resistance protein At4g27220 isoform X1 \\ 4.90E-28 \\ 66.54 % \\ GO:0055114-IEA;GO:0004497-IEA \\ oxidation-reduction process-IEA;monooxygenase activity-IEA \\ GO:0004497;GO:0055114 \\ monooxygenase activity;oxidation-reduction process		Toll/interleukin-1 receptor homology (TIR) domain
TRINITY_DN40335_c0_g2	FvH4_1g17850.1	3.6065	12.0617	8.45525	3.34445	0.00117921	0.164677	putative NEMP family protein \\ 1.80E-131 \\ 83.03 % \\ GO:0005737-IEA;GO:0006526-IEA;GO:0016020-IEA;GO:0004042-IEA;GO:0016021-IEA;GO:0016310-IEA;GO:0016301-IEA \\ cytoplasm-IEA;arginine biosynthetic process-IEA;membrane-IEA;acetyl-CoA:L-glutamate N-acetyltransferase activity-IEA;integral component of membrane-IEA;phosphorylation-IEA;kinase activity-IEA \\ GO:0004042;GO:0005737;GO:0006526;GO:0016…		NEMP family
TRINITY_DN29168_c0_g1	FvH4_2g28970.1	0.31175	1.04125	0.7295	3.34002	0.00230757	0.24562	auxin-responsive protein IAA29 \\ 2.80E-66 \\ 79.08 %		PB1 domain
TRINITY_DN1227_c0_g1	FvH4_5g30900.1	0.977	3.25	2.273	3.32651	0.0061428	0.43678	sulfate transporter 1.3-like \\ 0.00E+00 \\ 88.25 % \\ GO:0015116-IEA;GO:0015116-IBA;GO:0008272-IEA;GO:0055085-IEA;GO:0008271-IEA;GO:0015301-IBA;GO:0016020-IEA;GO:0098656-IEA;GO:0016021-IEA;GO:0016021-IBA;GO:1902358-IEA;GO:0005886-IEA \\ sulfate transmembrane transporter activity-IEA;sulfate transmembrane transporter activity-IBA;sulfate transport-IEA;transmembrane transport-IEA;secondary active …		SLC26A/SulP transporter
TRINITY_DN15162_c0_g1	FvH4_6g52350.1	0.5515	1.831	1.2795	3.32004	0.0108481	0.612698	putative transcription factor C2H2 family		Zinc finger, RING-type
TRINITY_DN8053_c0_g2	FvH4_3g23570.1	1.874	6.2025	4.3285	3.30977	0.007088	0.476352	indole-3-acetate O-methyltransferase 1 \\ 0.00E+00 \\ 94.20 % \\ GO:0103007-IEA;GO:0008168-IEA;GO:0016740-IEA;GO:0032259-IEA \\ indole-3-acetate carboxyl methyltransferase activity-IEA;methyltransferase activity-IEA;transferase activity-IEA;methylation-IEA \\ GO:0032259;GO:0103007 \\ methylation;indole-3-acetate carboxyl methyltransferase activity	indole-3-acetate O-methyltransferase [EC:2.1.1.278]	SAM dependent carboxyl methyltransferase
TRINITY_DN4528_c0_g1	FvH4_3g03110.1	0.6575	2.173	1.5155	3.30494	0.00125503	0.17123	PREDICTED: uncharacterized protein LOC101299806 \\ 7.50E-11 \\ 59.38 %
TRINITY_DN49809_c0_g1	FvH4_5g39020.1	14.8935	49.2025	34.309	3.30362	0.00276793	0.274893	probable calcium-binding protein CML29 \\ 1.60E-07 \\ 92.91 % \\ GO:0006913-IEA;GO:0051028-IEA;GO:0015031-IEA;GO:0005643-IEA;GO:0031965-IEA;GO:0005634-IEA;GO:0003676-IEA \\ nucleocytoplasmic transport-IEA;mRNA transport-IEA;protein transport-IEA;nuclear pore-IEA;nuclear membrane-IEA;nucleus-IEA;nucleic acid binding-IEA \\ GO:0003676;GO:0005643;GO:0006913;GO:0015031;GO:0031965;GO:0051028 \\ nuclei…		EF-hand domain
TRINITY_DN28502_c0_g1	FvH4_3g21130.1	44.874	147.071	102.197	3.27743	0.00403752	0.342561	putative wound-induced protein \\ 2.20E-58 \\ 79.38 % \\ GO:0046983-IEA \\ protein dimerization activity-IEA \\ GO:0046983 \\ protein dimerization activity		Protein of unknown function wound-induced
TRINITY_DN8498_c0_g1	FvH4_7g18180.1	3.1575	10.3483	7.19075	3.27736	0.000615587	0.113929	probable inactive purple acid phosphatase 29 \\ 0.00E+00 \\ 91.36 % \\ GO:0016787-IEA \\ hydrolase activity-IEA \\ GO:0016787 \\ hydrolase activity		Calcineurin-like phosphoesterase domain, ApaH type
TRINITY_DN230946_c0_g1	FvH4_4g22430.1	0.4965	1.62425	1.12775	3.2714	0.00245638	0.254966	indole-3-acetic acid-amido synthetase GH3.17-like \\ 0.00E+00 \\ 92.99 %		GH3 family
TRINITY_DN4136_c0_g1	FvH4_2g15060.1	0.46925	1.52875	1.0595	3.25786	3.03161e-05	0.0207544	casparian strip membrane protein 1-like \\ 2.60E-123 \\ 89.93 %		Casparian strip membrane protein
TRINITY_DN1502_c0_g2	FvH4_4g13420.1	0.37825	1.23075	0.8525	3.2538	0.000150851	0.0514078	TMV resistance protein N-like \\ 0.00E+00 \\ 79.38 %		Toll/interleukin-1 receptor homology (TIR) domain
TRINITY_DN11168_c1_g2	FvH4_5g05650.1	2.8975	9.407	6.5095	3.24659	0.000680097	0.119032	probable apyrase 7 \\ 0.00E+00 \\ 79.00 % \\ GO:0045134-IEA;GO:0016020-IEA;GO:0016021-IEA;GO:0017110-IEA;GO:0016787-IEA \\ uridine-diphosphatase activity-IEA;membrane-IEA;integral component of membrane-IEA;nucleoside-diphosphatase activity-IEA;hydrolase activity-IEA \\ GO:0016021;GO:0045134 \\ integral component of membrane;uridine-diphosphatase activity		Nucleoside phosphatase GDA1/CD39
TRINITY_DN10841_c3_g1	FvH4_2g04770.1	0.517	1.67575	1.15875	3.2413	0.0322303	0.929067	putative cyclin-A3-1		Cyclin, N-terminal
TRINITY_DN2848_c0_g1	FvH4_6g04370.1	1.10725	3.56525	2.458	3.21991	0.0130955	0.688807	DNA repair protein XRCC4 \\ 2.40E-05 \\ 70.01 % \\ GO:0003677-IEA;GO:0006310-IEA;GO:0006302-IEA;GO:0005634-IEA \\ DNA binding-IEA;DNA recombination-IEA;double-strand break repair-IEA;nucleus-IEA
TRINITY_DN114_c0_g2	FvH4_3g02690.1	0.78675	2.532	1.74525	3.2183	0.00393403	0.337686	PREDICTED: uncharacterized protein LOC101307567 isoform X1 \\ 8.40E-128 \\ 85.38 % \\ GO:0016020-IEA;GO:0016021-IEA \\ membrane-IEA;integral component of membrane-IEA \\ GO:0016021 \\ integral component of membrane
TRINITY_DN636_c0_g1	FvH4_6g29230.1	1.01175	3.2435	2.23175	3.20583	6.60532e-05	0.0322955	---NA---		Diacylglycerol kinase, accessory domain
TRINITY_DN10906_c1_g1	FvH4_6g10130.1	0.48875	1.56625	1.0775	3.2046	0.000208846	0.0613033	putative isopenicillin N synthase \\ 4.20E-47 \\ 93.85 % \\ GO:0003677-IEA;GO:0003700-IEA;GO:0006355-IEA;GO:0043565-IEA;GO:0005634-IEA \\ DNA binding-IEA;DNA-binding transcription factor activity-IEA;regulation of transcription, DNA-templated-IEA;sequence-specific DNA binding-IEA;nucleus-IEA \\ GO:0003700;GO:0005634;GO:0006355;GO:0043565 \\ DNA-binding transcription factor activity;nucleus;regula…		Isopenicillin N synthase-like
TRINITY_DN19094_c0_g1	FvH4_4g27380.1	0.337	1.078	0.741	3.19881	0.0253354	0.929067	LOB domain-containing protein 42 \\ 9.90E-76 \\ 84.44 % \\ GO:0016020-IEA;GO:0016021-IEA;GO:0016874-IEA \\ membrane-IEA;integral component of membrane-IEA;ligase activity-IEA \\ GO:0016021;GO:0016874 \\ integral component of membrane;ligase activity		Lateral organ boundaries, LOB
TRINITY_DN6447_c0_g1	FvH4_4g19340.1	19.4767	62.2782	42.8015	3.19757	8.92845e-05	0.0378749	putative endosulphine \\ 5.20E-42 \\ 90.94 % \\ GO:0016020-IEA;GO:0016021-IEA \\ membrane-IEA;integral component of membrane-IEA \\ GO:0016021 \\ integral component of membrane		Endosulphine
TRINITY_DN1515_c1_g1	FvH4_7g30740.1	0.509	1.626	1.117	3.1945	0.000181142	0.0570016	protein timeless homolog \\ 0.00E+00 \\ 79.27 %		Timeless protein
TRINITY_DN8731_c0_g1	FvH4_7g31270.1	0.33575	1.07225	0.7365	3.1936	4.0069e-05	0.024058	putative disease resistance protein RGA3 \\ 0.00E+00 \\ 76.73 % \\ GO:0043531-IEA;GO:0016787-IEA \\ ADP binding-IEA;hydrolase activity-IEA \\ GO:0016787;GO:0043531 \\ hydrolase activity;ADP binding		NB-ARC
TRINITY_DN4316_c0_g2	FvH4_4g29540.1	0.97125	3.1005	2.12925	3.19228	0.000282919	0.072693	---NA---
TRINITY_DN29380_c0_g1	FvH4_6g42630.1	1.76725	5.61875	3.8515	3.17937	0.000349276	0.08309	hypothetical protein RchiOBHm_Chr2g0158481 \\ 5.00E-13 \\ 89.53 %
TRINITY_DN8273_c0_g1	FvH4_3g36110.1	15.6013	49.2137	33.6125	3.15447	1.21333e-05	0.0122503	mitochondrial import inner membrane translocase subunit Tim9 \\ 9.50E-154 \\ 67.10 % \\ GO:0008233-IEA;GO:0006508-IEA;GO:0004252-IEA \\ peptidase activity-IEA;proteolysis-IEA;serine-type endopeptidase activity-IEA	mitochondrial import inner membrane translocase subunit TIM9	Tim10-like
TRINITY_DN19007_c0_g1	FvH4_4g27050.1	3.11825	9.80775	6.6895	3.14527	0.00248875	0.257285	uncharacterized protein LOC112198129 \\ 2.20E-102 \\ 61.63 %
TRINITY_DN561_c0_g1	FvH4_5g21720.1	3.7455	11.7712	8.02575	3.14277	0.00185688	0.214369	plant intracellular Ras-group-related LRR protein 5-like \\ 0.00E+00 \\ 85.96 %		Leucine-rich repeat
TRINITY_DN18444_c0_g1	FvH4_7g06310.1	0.52875	1.66125	1.1325	3.14184	0.00399004	0.340879	glucomannan 4-beta-mannosyltransferase 9-like \\ 0.00E+00 \\ 95.11 % \\ GO:0016020-IEA;GO:0016021-IEA;GO:0016740-IEA \\ membrane-IEA;integral component of membrane-IEA;transferase activity-IEA \\ GO:0016021;GO:0016740 \\ integral component of membrane;transferase activity	beta-mannan synthase [EC:2.4.1.32]	Nucleotide-diphospho-sugar transferases
TRINITY_DN2092_c3_g1	FvH4_7g01680.1	0.41725	1.307	0.88975	3.13241	0.0449045	0.929067	---NA---
TRINITY_DN7173_c0_g1	FvH4_2g35610.1	0.64525	2.018	1.37275	3.12747	0.000511834	0.10239	carotenoid cleavage dioxygenase 8 homolog B, chloroplastic \\ 0.00E+00 \\ 85.73 % \\ GO:0016702-IEA;GO:0009507-IBA;GO:0051213-IEA;GO:0046872-IEA;GO:0016491-IEA;GO:0010436-IBA;GO:0016121-IBA;GO:0055114-IEA \\ oxidoreductase activity, acting on single donors with incorporation of molecular oxygen, incorporation of two atoms of oxygen-IEA;chloroplast-IBA;dioxygenase activity-IEA;metal ion binding-IE…	carlactone synthase / all-trans-10'-apo-beta-carotenal 13,14-cleaving dioxygenase [EC:1.13.11.69 1.13.11.70]	Carotenoid oxygenase
TRINITY_DN2068_c1_g1	FvH4_2g21740.1	0.5025	1.571	1.0685	3.12637	0.00163956	0.200041	---NA--- \\ 0.00E+00 \\ 92.63 % \\ GO:0016020-IEA;GO:0016740-IEA;GO:0031225-IEA;GO:0005886-IEA \\ membrane-IEA;transferase activity-IEA;anchored component of membrane-IEA;plasma membrane-IEA \\ GO:0005886;GO:0016740;GO:0031225 \\ plasma membrane;transferase activity;anchored component of membrane
TRINITY_DN5926_c0_g1	FvH4_1g06350.1	5.027	15.6797	10.6527	3.11911	0.000192485	0.0586536	probable pectinesterase 53 \\ 3.10E-169 \\ 91.94 % \\ GO:0005618-IEA;GO:0045330-IEA;GO:0016829-IEA;GO:0030599-IEA;GO:0045490-IEA;GO:0042545-IEA;GO:0016787-IEA \\ cell wall-IEA;aspartyl esterase activity-IEA;lyase activity-IEA;pectinesterase activity-IEA;pectin catabolic process-IEA;cell wall modification-IEA;hydrolase activity-IEA \\ GO:0005618;GO:0016829;GO:0030599;GO:0042545;GO:0045330;GO:00454…	pectinesterase [EC:3.1.1.11]	Pectinesterase, catalytic
TRINITY_DN490_c0_g1	FvH4_7g32290.1	4.102	12.779	8.677	3.11531	0.0124256	0.667123	zinc finger with UFM1-specific peptidase domain protein isoform X1 \\ 0.00E+00 \\ 83.73 %		Peptidase C78, ubiquitin fold modifier-specific peptidase 1/ 2
TRINITY_DN2313_c0_g1	FvH4_2g15430.1	1.993	6.1655	4.1725	3.09358	0.000273014	0.0712388	---NA---
TRINITY_DN391_c0_g1	FvH4_5g09340.1	6.5065	20.1225	13.616	3.09268	2.78555e-06	0.00631223	pentatricopeptide repeat-containing protein At5g61990, mitochondrial \\ 0.00E+00 \\ 79.72 %	leucine-rich PPR motif-containing protein, mitochondrial	Pentatricopeptide repeat
TRINITY_DN584_c0_g1	FvH4_4g31750.1	2.5685	7.8935	5.325	3.07319	0.000557285	0.108522	pentatricopeptide repeat-containing protein At2g02750 \\ 0.00E+00 \\ 80.91 % \\ GO:0009451-IBA \\ RNA modification-IBA \\ GO:0009451 \\ RNA modification		Pentatricopeptide repeat
TRINITY_DN7826_c0_g1	FvH4_3g08870.1	1.4075	4.316	2.9085	3.06643	0.000893254	0.13983	---NA---		Mitochondrial substrate/solute carrier
TRINITY_DN6977_c0_g1	FvH4_5g02510.1	3.786	11.5685	7.7825	3.0556	0.00910736	0.554238	BLOC-1-related complex subunit 6		BLOC-1-related complex subunit 6
TRINITY_DN11822_c0_g1	FvH4_2g36430.1	1.7845	5.45025	3.66575	3.05422	0.000176536	0.0561525	auxin-responsive protein SAUR72 \\ 7.40E-98 \\ 82.68 % \\ GO:0009733-IEA \\ response to auxin-IEA \\ GO:0009733 \\ response to auxin		Small auxin-up RNA
TRINITY_DN16224_c0_g1	FvH4_1g18750.1	0.32875	1.004	0.67525	3.05399	0.0193107	0.865818	transcription factor bHLH18-like \\ 1.40E-136 \\ 91.62 % \\ GO:0009826-IEA;GO:0005618-IEA;GO:0080022-IEA;GO:0016020-IEA;GO:0016021-IEA;GO:0071555-IEA;GO:0009664-IEA;GO:0005576-IEA \\ unidimensional cell growth-IEA;cell wall-IEA;primary root development-IEA;membrane-IEA;integral component of membrane-IEA;cell wall organization-IEA;plant-type cell wall organization-IEA;extracellular region-IEA \\ G…		Myc-type, basic helix-loop-helix (bHLH) domain
TRINITY_DN3863_c0_g1	FvH4_4g11950.1	9.2805	28.2948	19.0143	3.04884	0.00151121	0.191667	tryptophan--tRNA ligase, cytoplasmic \\ 0.00E+00 \\ 96.33 % \\ GO:0006418-IEA;GO:0000166-IEA;GO:0005737-IEA;GO:0004812-IEA;GO:0005829-IEA;GO:0016740-IEA;GO:0006436-IEA;GO:0006436-IBA;GO:0016874-IEA;GO:0005524-IEA;GO:0006412-IEA;GO:0004830-IEA;GO:0004830-IBA \\ tRNA aminoacylation for protein translation-IEA;nucleotide binding-IEA;cytoplasm-IEA;aminoacyl-tRNA ligase activity-IEA;cytosol-IEA;transf…	tryptophanyl-tRNA synthetase [EC:6.1.1.2]	Aminoacyl-tRNA synthetase, class I, conserved site
TRINITY_DN5_c0_g1	FvH4_6g27490.1	5.07875	15.4775	10.3987	3.0475	2.36211e-05	0.017792	serine/threonine-protein kinase EDR1-like isoform X1 \\ 0.00E+00 \\ 91.59 % \\ GO:0016310-IEA;GO:0004672-IEA;GO:0016740-IEA;GO:0016301-IEA;GO:0005524-IEA;GO:0006468-IEA \\ phosphorylation-IEA;protein kinase activity-IEA;transferase activity-IEA;kinase activity-IEA;ATP binding-IEA;protein phosphorylation-IEA \\ GO:0004672;GO:0005524;GO:0006468 \\ protein kinase activity;ATP binding;protein phospho…		Protein kinase domain
TRINITY_DN27730_c0_g1	FvH4_3g18760.1	0.367	1.117	0.75	3.0436	0.00650544	0.454066	sodium/calcium exchanger NCL-like \\ 0.00E+00 \\ 84.67 % \\ GO:0055085-IEA;GO:0016020-IEA;GO:0005509-IEA;GO:0016021-IEA \\ transmembrane transport-IEA;membrane-IEA;calcium ion binding-IEA;integral component of membrane-IEA \\ GO:0005509;GO:0016021;GO:0055085 \\ calcium ion binding;integral component of membrane;transmembrane transport		EF-hand domain
TRINITY_DN1396_c1_g1	FvH4_3g27920.1	0.6175	1.8675	1.25	3.02429	3.15048e-05	0.0211915	protein LATERAL ROOT PRIMORDIUM 1 \\ 9.00E-126 \\ 68.03 % \\ GO:0016779-IEA;GO:0003964-IEA;GO:0090502-IEA;GO:0008270-IEA;GO:0006278-IEA;GO:0016740-IEA;GO:0004523-IEA;GO:0003676-IEA \\ nucleotidyltransferase activity-IEA;RNA-directed DNA polymerase activity-IEA;RNA phosphodiester bond hydrolysis, endonucleolytic-IEA;zinc ion binding-IEA;RNA-dependent DNA biosynthetic process-IEA;transferase activi…		Zinc finger, lateral root primordium type 1
TRINITY_DN3572_c0_g2	FvH4_2g23820.1	0.55475	1.67675	1.122	3.02253	0.00663035	0.458752	transcription factor bHLH69 \\ 0.00E+00 \\ 88.28 % \\ GO:0008152-IEA;GO:0009251-IBA;GO:0016162-IBA;GO:0000272-IEA;GO:0030245-IEA;GO:0004553-IEA;GO:0005975-IEA;GO:0016798-IEA;GO:0016787-IEA \\ metabolic process-IEA;glucan catabolic process-IBA;cellulose 1,4-beta-cellobiosidase activity-IBA;polysaccharide catabolic process-IEA;cellulose catabolic process-IEA;hydrolase activity, hydrolyzing O-glycos…		Myc-type, basic helix-loop-helix (bHLH) domain
TRINITY_DN3268_c0_g2	FvH4_6g36050.1	8.06325	24.2965	16.2333	3.01324	1.44016e-05	0.0135679	putative Cystatin domain-containing protein \\ 2.30E-113 \\ 63.74 % \\ GO:0004869-IEA;GO:0010951-IEA \\ cysteine-type endopeptidase inhibitor activity-IEA;negative regulation of endopeptidase activity-IEA		Cystatin domain
TRINITY_DN28657_c0_g1	FvH4_6g34220.1	1.25475	3.7745	2.51975	3.00817	0.0243706	0.929067	pollen-specific leucine-rich repeat extensin-like protein 1 \\ 0.00E+00 \\ 62.52 % \\ GO:0005829-IEA;GO:0016020-IEA;GO:0016021-IEA;GO:0005634-IEA;GO:0005886-IEA \\ cytosol-IEA;membrane-IEA;integral component of membrane-IEA;nucleus-IEA;plasma membrane-IEA \\ GO:0016021 \\ integral component of membrane		Protein of unknown function DUF761, plant
TRINITY_DN168_c0_g1	FvH4_6g31430.1	1.4695	4.41575	2.94625	3.00493	5.92817e-05	0.0303371	mitochondrial arginine transporter BAC2 \\ 6.40E-161 \\ 86.26 % \\ GO:0000064-IEA;GO:0005739-IEA;GO:0016020-IEA;GO:0016021-IEA;GO:0005290-IEA;GO:1903352-IEA;GO:0055085-IEA;GO:0015189-IEA;GO:1903401-IEA;GO:0006561-IEA;GO:0089709-IEA;GO:0006972-IEA;GO:0022857-IEA;GO:1903826-IEA;GO:0015181-IEA;GO:0006844-IBA \\ L-ornithine transmembrane transporter activity-IEA;mitochondrion-IEA;membrane-IEA;integra…		Mitochondrial carrier protein
TRINITY_DN6623_c0_g2	FvH4_1g02110.1	0.85525	2.5675	1.71225	3.00205	0.000183219	0.0573039	---NA---		Major facilitator superfamily
TRINITY_DN582_c0_g4	FvH4_5g14730.1	25.7482	77.1805	51.4322	2.9975	0.000880356	0.138752	PREDICTED: uncharacterized protein LOC101300623 \\ 1.20E-09 \\ 100.00 %
TRINITY_DN10230_c0_g1	FvH4_4g22030.1	0.448	1.33925	0.89125	2.9894	0.008922	0.546985	LEAF RUST 10 DISEASE-RESISTANCE LOCUS RECEPTOR-LIKE PROTEIN KINASE-like 2.2 \\ 0.00E+00 \\ 82.25 % \\ GO:0000166-IEA;GO:0016020-IEA;GO:0016021-IEA;GO:0016310-IEA;GO:0004672-IEA;GO:0016740-IEA;GO:0016301-IEA;GO:0004674-IEA;GO:0030246-IEA;GO:0005524-IEA;GO:0006468-IEA \\ nucleotide binding-IEA;membrane-IEA;integral component of membrane-IEA;phosphorylation-IEA;protein kinase activity-IEA;transferas…		Protein kinase domain
TRINITY_DN321_c2_g4	FvH4_3g17840.1	3.227	9.625	6.398	2.98265	0.00018291	0.0572886	probable leucine-rich repeat receptor-like serine/threonine-protein kinase At3g14840 \\ 0.00E+00 \\ 72.90 % \\ GO:0016020-IEA;GO:0016021-IEA;GO:0016310-IEA;GO:0004672-IEA;GO:0016740-IEA;GO:0016301-IEA;GO:0005524-IEA;GO:0006468-IEA \\ membrane-IEA;integral component of membrane-IEA;phosphorylation-IEA;protein kinase activity-IEA;transferase activity-IEA;kinase activity-IEA;ATP binding-IEA;protein …		Protein kinase domain
TRINITY_DN353_c0_g1	FvH4_4g18100.1	0.436	1.299	0.863	2.97936	0.00341442	0.311023	L-type lectin-domain containing receptor kinase S.6 \\ 0.00E+00 \\ 74.23 % \\ GO:0002229-IEA;GO:0002229-IBA;GO:0016020-IEA;GO:0016021-IEA;GO:0016310-IEA;GO:0016301-IEA;GO:0030246-IEA;GO:0007178-IEA;GO:0004672-IEA;GO:0042742-IEA;GO:0042742-IBA;GO:0004675-IBA;GO:0005524-IEA;GO:0006468-IEA;GO:0006952-IBA;GO:0005886-IBA \\ defense response to oomycetes-IEA;defense response to oomycetes-IBA;membrane-I…		Protein kinase domain
TRINITY_DN28961_c0_g1	FvH4_4g14250.1	24.698	73.572	48.874	2.97886	0.00424632	0.3527	---NA--- \\ 0.00E+00 \\ 97.42 %
TRINITY_DN7465_c0_g1	FvH4_5g05830.1	0.478	1.417	0.939	2.96444	0.00696595	0.470757	short-chain dehydrogenase TIC 32, chloroplastic \\ 3.20E-26 \\ 56.91 % \\ GO:0016020-IEA;GO:0016021-IEA \\ membrane-IEA;integral component of membrane-IEA		Short-chain dehydrogenase/reductase SDR
TRINITY_DN7506_c0_g2	FvH4_3g36030.1	38.6148	114.457	75.8422	2.96407	0.00021569	0.0627455	metallothionein-like protein type 2 \\ 5.10E-55 \\ 75.83 % \\ GO:0016020-IEA;GO:0016021-IEA \\ membrane-IEA;integral component of membrane-IEA \\ GO:0016020 \\ membrane		Metallothionein, family 15, plant
TRINITY_DN6626_c0_g2	FvH4_7g32490.1	0.51825	1.5355	1.01725	2.96286	0.00312955	0.295471	---NA--- \\ 7.10E-111 \\ 68.65 % \\ GO:0008097-IEA;GO:0008097-IBA;GO:0005737-IEA;GO:0003723-IEA;GO:0003735-IEA;GO:0022625-IBA;GO:0005840-IEA;GO:0019843-IEA;GO:0000027-IBA;GO:0006412-IEA;GO:0005634-IEA;GO:0005622-IEA \\ 5S rRNA binding-IEA;5S rRNA binding-IBA;cytoplasm-IEA;RNA binding-IEA;structural constituent of ribosome-IEA;cytosolic large ribosomal subunit-IBA;ribosome-IEA;rRNA binding-IEA;rib…
TRINITY_DN16369_c0_g1	FvH4_1g14030.1	0.9245	2.7365	1.812	2.95998	0.00453723	0.367935	anthocyanidin 3-O-glucosyltransferase 5-like \\ 0.00E+00 \\ 77.36 % \\ GO:0016757-IEA;GO:0016758-IEA;GO:0008194-IBA;GO:0080043-IBA;GO:0080044-IBA;GO:0043231-IBA;GO:0016740-IEA \\ transferase activity, transferring glycosyl groups-IEA;transferase activity, transferring hexosyl groups-IEA;UDP-glycosyltransferase activity-IBA;quercetin 3-O-glucosyltransferase activity-IBA;quercetin 7-O-glucosyltrans…	coniferyl-alcohol glucosyltransferase [EC:2.4.1.111]	UDP-glucuronosyl/UDP-glucosyltransferase
TRINITY_DN6705_c0_g1	FvH4_7g28660.1	0.8305	2.45825	1.62775	2.95996	0.0029463	0.284891	carboxylesterase 1-like \\ 0.00E+00 \\ 91.18 % \\ GO:0016020-IEA;GO:0016021-IEA;GO:0016787-IEA \\ membrane-IEA;integral component of membrane-IEA;hydrolase activity-IEA \\ GO:0016021;GO:0016787 \\ integral component of membrane;hydrolase activity		Alpha/beta hydrolase fold-3
TRINITY_DN273909_c0_g1	FvH4_4g33950.1	0.727	2.151	1.424	2.95873	0.0440696	0.929067	21 kDa protein-like \\ 1.30E-29 \\ 81.97 % \\ GO:0003824-IEA;GO:0016020-IEA;GO:0016021-IEA \\ catalytic activity-IEA;membrane-IEA;integral component of membrane-IEA \\ GO:0003824;GO:0016021 \\ catalytic activity;integral component of membrane		Pectinesterase inhibitor domain
TRINITY_DN16528_c0_g1	FvH4_3g16940.1	0.882	2.60225	1.72025	2.9504	0.0319561	0.929067	---NA---
TRINITY_DN11313_c1_g2	FvH4_4g35530.1	1.1885	3.504	2.3155	2.94825	0.000956113	0.145385	wall-associated receptor kinase 3 \\ 3.20E-174 \\ 86.43 % \\ GO:0016310-IEA;GO:0030247-IEA;GO:0016301-IEA \\ phosphorylation-IEA;polysaccharide binding-IEA;kinase activity-IEA \\ GO:0016301;GO:0016310;GO:0030247 \\ kinase activity;phosphorylation;polysaccharide binding		Wall-associated receptor kinase, galacturonan-binding domain
TRINITY_DN325410_c0_g1	FvH4_3g32270.1	1.00575	2.961	1.95525	2.94407	0.00131915	0.176156	PREDICTED: uncharacterized protein LOC105349919 \\ 1.20E-14 \\ 50.26 %
TRINITY_DN4022_c0_g2	FvH4_3g01280.1	25.6232	75.2605	49.6372	2.9372	0.00377574	0.329516	1-aminocyclopropane-1-carboxylate oxidase \\ 0.00E+00 \\ 86.38 % \\ GO:0071949-IEA;GO:0016491-IEA;GO:0055114-IEA;GO:0102099-IEA \\ FAD binding-IEA;oxidoreductase activity-IEA;oxidation-reduction process-IEA;FAD-dependent urate hydroxylase activity-IEA \\ GO:0055114;GO:0071949;GO:0102099 \\ oxidation-reduction process;FAD binding;FAD-dependent urate hydroxylase activity	aminocyclopropanecarboxylate oxidase [EC:1.14.17.4]	Oxoglutarate/iron-dependent dioxygenase
TRINITY_DN1584_c0_g1	FvH4_7g29110.1	0.59775	1.7475	1.14975	2.92346	0.00100172	0.149752	RHOMBOID-like protein 2 \\ 3.30E-06 \\ 92.80 % \\ GO:0000166-IEA;GO:0016310-IEA;GO:0016740-IEA;GO:0016301-IEA;GO:0004674-IEA;GO:0005524-IEA;GO:0006468-IEA;GO:0006974-IEA \\ nucleotide binding-IEA;phosphorylation-IEA;transferase activity-IEA;kinase activity-IEA;protein serine/threonine kinase activity-IEA;ATP binding-IEA;protein phosphorylation-IEA;cellular response to DNA damage stimulus-IEA		Peptidase S54, rhomboid
TRINITY_DN17268_c0_g1	FvH4_4g28780.1	2.81125	8.21325	5.402	2.92157	0.00438399	0.360395	basic leucine zipper 43		Basic-leucine zipper domain
TRINITY_DN2701_c1_g1	FvH4_6g11080.1	2.00325	5.81875	3.8155	2.90465	0.000397908	0.0901609	receptor-like protein 12 \\ 0.00E+00 \\ 81.50 % \\ GO:0016020-IEA;GO:0016021-IEA \\ membrane-IEA;integral component of membrane-IEA \\ GO:0016021 \\ integral component of membrane		Leucine-rich repeat
TRINITY_DN1150_c0_g2	FvH4_6g03110.1	17.0732	49.5538	32.4805	2.90242	0.000339694	0.0815662	probable aldo-keto reductase 1 isoform X1 \\ 0.00E+00 \\ 88.04 % \\ GO:0051213-IEA;GO:0016491-IEA;GO:0046872-IEA;GO:0055114-IEA;GO:0045543-IEA \\ dioxygenase activity-IEA;oxidoreductase activity-IEA;metal ion binding-IEA;oxidation-reduction process-IEA;gibberellin 2-beta-dioxygenase activity-IEA \\ GO:0045543;GO:0046872;GO:0055114 \\ gibberellin 2-beta-dioxygenase activity;metal ion binding;oxida…		NADP-dependent oxidoreductase domain
TRINITY_DN1010_c1_g1	FvH4_5g07540.1	43.539	126.062	82.5235	2.89539	6.29153e-05	0.0312115	putative cytochrome P450 \\ 0.00E+00 \\ 83.04 % \\ GO:0005506-IEA;GO:0016491-IEA;GO:0016705-IEA;GO:0046872-IEA;GO:0016020-IEA;GO:0016021-IEA;GO:0020037-IEA;GO:0055114-IEA;GO:0004497-IEA \\ iron ion binding-IEA;oxidoreductase activity-IEA;oxidoreductase activity, acting on paired donors, with incorporation or reduction of molecular oxygen-IEA;metal ion binding-IEA;membrane-IEA;integral component o…		Cytochrome P450
TRINITY_DN138_c0_g2	FvH4_6g46330.1	20.575	59.5193	38.9443	2.89279	0.00189821	0.217229	formin-2 isoform X2 \\ 3.50E-32 \\ 68.02 %
TRINITY_DN7041_c0_g1	FvH4_7g00230.1	101.09	290.22	189.13	2.87091	0.0168101	0.798643	vicianin hydrolase-like \\ 0.00E+00 \\ 84.22 % \\ GO:0008152-IEA;GO:0004553-IEA;GO:0005975-IEA;GO:0016798-IEA;GO:0016787-IEA \\ metabolic process-IEA;hydrolase activity, hydrolyzing O-glycosyl compounds-IEA;carbohydrate metabolic process-IEA;hydrolase activity, acting on glycosyl bonds-IEA;hydrolase activity-IEA \\ GO:0004553;GO:0005975 \\ hydrolase activity, hydrolyzing O-glycosyl compounds;carb…	vicianin beta-glucosidase [EC:3.2.1.119]	Glycoside hydrolase family 1
TRINITY_DN8586_c0_g1	FvH4_3g13820.1	1.77225	5.0535	3.28125	2.85146	1.10543e-05	0.0115051	aspartic proteinase nepenthesin-1 \\ 0.00E+00 \\ 75.43 % \\ GO:0004190-IEA;GO:0004190-IBA;GO:0008233-IEA;GO:0006508-IEA;GO:0006508-IBA;GO:0016020-IEA;GO:0016021-IEA;GO:0030163-IBA;GO:0016787-IEA \\ aspartic-type endopeptidase activity-IEA;aspartic-type endopeptidase activity-IBA;peptidase activity-IEA;proteolysis-IEA;proteolysis-IBA;membrane-IEA;integral component of membrane-IEA;protein cataboli…		Aspartic peptidase A1 family
TRINITY_DN1928_c0_g1	FvH4_7g30630.1	2.05225	5.849	3.79675	2.85004	0.011815	0.646796	---NA---		Voltage-dependent anion channel
TRINITY_DN2429_c0_g1	FvH4_7g17690.1	1.9905	5.664	3.6735	2.84552	0.00105645	0.153944	28 kDa ribonucleoprotein, chloroplastic	polyadenylate-binding protein	RNA recognition motif domain
TRINITY_DN1965_c4_g1	FvH4_6g10890.1	0.37075	1.0525	0.68175	2.83884	0.00618669	0.438397	importin subunit beta-1-like \\ 0.00E+00 \\ 81.72 % \\ GO:0006913-IEA;GO:0008565-IEA;GO:0008536-IEA;GO:0005634-IEA;GO:0006886-IEA \\ nucleocytoplasmic transport-IEA;protein transporter activity-IEA;Ran GTPase binding-IEA;nucleus-IEA;intracellular protein transport-IEA \\ GO:0005634;GO:0006886;GO:0006913;GO:0008536;GO:0008565 \\ nucleus;intracellular protein transport;nucleocytoplasmic transport;R…		Importin-beta, N-terminal domain
TRINITY_DN582_c0_g3	FvH4_3g43760.1	3.70125	10.5038	6.8025	2.83789	0.00184188	0.213802	---NA--- \\ 0.00E+00 \\ 67.64 % \\ GO:0008270-IEA;GO:0006355-IBA;GO:0005634-IEA;GO:0005634-IBA;GO:0005622-IEA \\ zinc ion binding-IEA;regulation of transcription, DNA-templated-IBA;nucleus-IEA;nucleus-IBA;intracellular-IEA \\ GO:0005634;GO:0008270 \\ nucleus;zinc ion binding
TRINITY_DN599_c2_g1	FvH4_6g38290.1	0.84925	2.405	1.55575	2.83191	0.00394778	0.33831	glucan endo-1,3-beta-glucosidase 1 \\ 2.30E-63 \\ 90.92 % \\ GO:0008152-IEA;GO:0042973-IEA;GO:0016787-IEA;GO:0016798-IEA \\ metabolic process-IEA;glucan endo-1,3-beta-D-glucosidase activity-IEA;hydrolase activity-IEA;hydrolase activity, acting on glycosyl bonds-IEA \\ GO:0008152;GO:0042973 \\ metabolic process;glucan endo-1,3-beta-D-glucosidase activity		X8 domain
TRINITY_DN3750_c0_g1	FvH4_5g39660.1	0.69625	1.97	1.27375	2.82944	0.00232155	0.246196	putative P-loop containing nucleoside triphosphate hydrolase \\ 0.00E+00 \\ 72.41 % \\ GO:0016020-IEA;GO:0016021-IEA;GO:0016787-IEA \\ membrane-IEA;integral component of membrane-IEA;hydrolase activity-IEA \\ GO:0016021;GO:0016787 \\ integral component of membrane;hydrolase activity		P-loop containing nucleoside triphosphate hydrolase
TRINITY_DN9492_c0_g1	FvH4_3g30360.1	3.08125	8.708	5.62675	2.82613	0.0040757	0.344368	lysosomal Pro-X carboxypeptidase-like \\ 0.00E+00 \\ 87.81 % \\ GO:0004180-IEA;GO:0006508-IEA;GO:0008236-IEA;GO:0016787-IEA \\ carboxypeptidase activity-IEA;proteolysis-IEA;serine-type peptidase activity-IEA;hydrolase activity-IEA \\ GO:0004180;GO:0006508;GO:0008236 \\ carboxypeptidase activity;proteolysis;serine-type peptidase activity	lysosomal Pro-X carboxypeptidase [EC:3.4.16.2]	Peptidase S28
TRINITY_DN4421_c0_g2	FvH4_6g42290.1	1.1395	3.2175	2.078	2.82361	0.00019749	0.0594986	PREDICTED: uncharacterized protein LOC101302183 \\ 0.00E+00 \\ 79.15 % \\ GO:0016020-IEA;GO:0016021-IEA \\ membrane-IEA;integral component of membrane-IEA \\ GO:0016021 \\ integral component of membrane
TRINITY_DN2460_c0_g1	FvH4_3g05770.1	2.88825	8.147	5.25875	2.82074	0.00080273	0.13126	cytochrome b561 domain-containing protein At4g18260 \\ 4.00E-71 \\ 74.54 % \\ GO:0016020-IEA;GO:0016021-IEA;GO:0055114-IEA \\ membrane-IEA;integral component of membrane-IEA;oxidation-reduction process-IEA \\ GO:0016021;GO:0055114 \\ integral component of membrane;oxidation-reduction process		Cytochrome b561/ferric reductase transmembrane
TRINITY_DN43522_c1_g1	FvH4_4g18470.1	2.76475	7.7865	5.02175	2.81635	0.0189409	0.856216	late embryogenesis abundant protein Lea5 \\ 3.80E-108 \\ 70.01 %		Late embryogenesis abundant protein, LEA5-type
TRINITY_DN10912_c0_g1	FvH4_7g05770.1	0.6105	1.71875	1.10825	2.81532	0.00401786	0.341645	protein FAR1-RELATED SEQUENCE 5-like \\ 0.00E+00 \\ 66.84 % \\ GO:0008270-IEA;GO:0006355-IEA \\ zinc ion binding-IEA;regulation of transcription, DNA-templated-IEA		GDSL lipase/esterase
TRINITY_DN20522_c0_g1	FvH4_2g40890.1	2.59775	7.3115	4.71375	2.81455	0.00060429	0.112758	---NA---		SANT/Myb domain
TRINITY_DN2326_c0_g1	FvH4_5g32130.1	1.63675	4.5895	2.95275	2.80403	0.000258807	0.0693943	MATH domain and coiled-coil domain-containing protein At3g58270-like \\ 0.00E+00 \\ 66.33 % \\ GO:0006508-IEA;GO:0016787-IEA;GO:0036459-IEA \\ proteolysis-IEA;hydrolase activity-IEA;thiol-dependent ubiquitinyl hydrolase activity-IEA \\ GO:0006508;GO:0036459 \\ proteolysis;thiol-dependent ubiquitinyl hydrolase activity		MATH/TRAF domain
TRINITY_DN1944_c2_g1	FvH4_4g07270.1	1.54325	4.32075	2.7775	2.79977	0.00321657	0.300309	protein CHLOROPLAST IMPORT APPARATUS 2-like isoform X1 \\ 9.00E-174 \\ 77.51 % \\ GO:0005634-IEA \\ nucleus-IEA \\ GO:0005634 \\ nucleus		CCT domain
TRINITY_DN6829_c0_g1	FvH4_1g09610.1	6.54175	18.2982	11.7565	2.79715	8.01783e-05	0.035746	pectinesterase/pectinesterase inhibitor PPE8B \\ 0.00E+00 \\ 88.50 % \\ GO:0004857-IEA;GO:0005618-IEA;GO:0043086-IEA;GO:0045330-IEA;GO:0071555-IEA;GO:0030599-IEA;GO:0005576-IEA;GO:0045490-IEA;GO:0042545-IEA;GO:0016787-IEA \\ enzyme inhibitor activity-IEA;cell wall-IEA;negative regulation of catalytic activity-IEA;aspartyl esterase activity-IEA;cell wall organization-IEA;pectinesterase activity-IE…	pectinesterase [EC:3.1.1.11]	Pectinesterase, catalytic
TRINITY_DN9918_c0_g1	FvH4_7g09340.1	1.615	4.51	2.895	2.79257	0.00214518	0.233999	---NA---		Cyclin P/U
TRINITY_DN2882_c0_g2	FvH4_6g50090.1	1.18475	3.3035	2.11875	2.78835	0.00619967	0.439065	---NA---		Armadillo
TRINITY_DN3143_c0_g2	FvH4_6g31520.1	1.56675	4.36825	2.8015	2.7881	0.000816225	0.132555	bromodomain-containing protein 4-like \\ 2.60E-96 \\ 72.20 % \\ GO:0008270-IEA;GO:0016571-IEA;GO:0005694-IEA;GO:0018024-IEA;GO:0008168-IEA;GO:0016740-IEA;GO:0034968-IEA;GO:0005634-IEA;GO:0032259-IEA \\ zinc ion binding-IEA;histone methylation-IEA;chromosome-IEA;histone-lysine N-methyltransferase activity-IEA;methyltransferase activity-IEA;transferase activity-IEA;histone lysine methylation-IEA;nu…
TRINITY_DN5776_c0_g1	FvH4_3g11600.1	2.3245	6.4725	4.148	2.78447	0.0123609	0.664923	vacuolar protein sorting-associated protein 2 homolog 2 \\ 1.30E-20 \\ 62.12 %	charged multivesicular body protein 2A	Snf7 family
TRINITY_DN31584_c0_g3	FvH4_4g03100.1	1.03875	2.889	1.85025	2.78123	0.0230805	0.929067	---NA---
TRINITY_DN5708_c0_g1	FvH4_1g14880.1	0.55325	1.53625	0.983	2.77677	0.00685322	0.466683	probable esterase PIR7A \\ 8.00E-109 \\ 73.66 % \\ GO:0102151-IEA;GO:0050410-IEA;GO:0016829-IEA;GO:0102577-IEA \\ 3-oxo-myristate decarboxylase activity-IEA;3-oxolaurate decarboxylase activity-IEA;lyase activity-IEA;3-oxo-palmitate decarboxylase activity-IEA \\ GO:0016831 \\ carboxy-lyase activity		Alpha/beta hydrolase fold-1
TRINITY_DN13769_c0_g2	FvH4_6g34350.1	0.9495	2.63375	1.68425	2.77383	0.000121248	0.0458319	protein SODIUM POTASSIUM ROOT DEFECTIVE 3-like \\ 5.10E-14 \\ 87.44 % \\ GO:0046872-IEA;GO:0030001-IEA \\ metal ion binding-IEA;metal ion transport-IEA \\ GO:0030001;GO:0046872 \\ metal ion transport;metal ion binding
TRINITY_DN3542_c0_g2	FvH4_7g02040.1	4.55625	12.5742	8.018	2.75978	1.3905e-05	0.0133449	PHD finger protein ING2		Zinc finger, PHD-type
TRINITY_DN1964_c1_g1	FvH4_6g15090.1	0.6045	1.66675	1.06225	2.75724	0.0120974	0.657061	putative disease resistance protein RGA4 isoform X1 \\ 0.00E+00 \\ 84.26 % \\ GO:0043531-IEA;GO:0016787-IEA \\ ADP binding-IEA;hydrolase activity-IEA \\ GO:0016787;GO:0043531 \\ hydrolase activity;ADP binding		NB-ARC
TRINITY_DN1994_c1_g1	FvH4_6g26190.1	0.7465	2.0565	1.31	2.75486	0.000968081	0.146482	DTW domain-containing protein isoform 1 \\ 0.00E+00 \\ 77.08 %		DTW
TRINITY_DN12476_c0_g1	FvH4_4g17720.1	2.3565	6.47125	4.11475	2.74613	0.00311026	0.29401	protein SRG1		Oxoglutarate/iron-dependent dioxygenase
TRINITY_DN14205_c0_g1	FvH4_6g07720.1	0.366	1.00275	0.63675	2.73975	0.0211725	0.916999	protein SUPPRESSOR OF NIM1 1-like \\ 0.00E+00 \\ 72.13 % \\ GO:0016020-IEA;GO:0016021-IEA \\ membrane-IEA;integral component of membrane-IEA \\ GO:0016021 \\ integral component of membrane		F-box associated domain, type 1
TRINITY_DN516_c0_g1	FvH4_5g38680.1	1.43775	3.937	2.49925	2.73831	1.14769e-06	0.00417473	TMV resistance protein N-like \\ 0.00E+00 \\ 76.78 % \\ GO:0007165-IEA;GO:0043531-IEA \\ signal transduction-IEA;ADP binding-IEA		Toll/interleukin-1 receptor homology (TIR) domain
TRINITY_DN1106_c0_g1	FvH4_7g26280.1	0.513	1.39875	0.88575	2.72661	0.00515599	0.396309	hypothetical protein RchiOBHm_Chr1g0372731 \\ 3.20E-06 \\ 71.43 % \\ GO:0016020-IEA;GO:0016021-IEA \\ membrane-IEA;integral component of membrane-IEA
TRINITY_DN5858_c0_g1	FvH4_3g40250.1	0.48725	1.32525	0.838	2.71986	0.008119	0.517315	putative GTP-binding protein, ribosome biogenesis, YsxC \\ 0.00E+00 \\ 77.70 % \\ GO:0005525-IEA \\ GTP binding-IEA \\ GO:0005525 \\ GTP binding		GTP binding domain
TRINITY_DN22079_c0_g1	FvH4_5g37950.1	22.353	60.7855	38.4325	2.71934	0.000275895	0.0716049	glucan 1,3-beta-glucosidase A-like \\ 0.00E+00 \\ 89.70 % \\ GO:0008152-IEA;GO:0051015-IEA;GO:0007015-IEA;GO:0004553-IEA;GO:0016798-IEA;GO:0005975-IEA;GO:0016787-IEA \\ metabolic process-IEA;actin filament binding-IEA;actin filament organization-IEA;hydrolase activity, hydrolyzing O-glycosyl compounds-IEA;hydrolase activity, acting on glycosyl bonds-IEA;carbohydrate metabolic process-IEA;hydrolas…		Glycoside hydrolase, family 5
TRINITY_DN15033_c0_g1	FvH4_6g20390.1	1.005	2.7215	1.7165	2.70796	0.000435383	0.0939275	E3 ubiquitin-protein ligase PUB24-like \\ 0.00E+00 \\ 82.52 % \\ GO:0003860-IEA;GO:0016787-IEA \\ 3-hydroxyisobutyryl-CoA hydrolase activity-IEA;hydrolase activity-IEA \\ GO:0003860 \\ 3-hydroxyisobutyryl-CoA hydrolase activity		U box domain
TRINITY_DN2849_c0_g1	FvH4_2g07780.1	115.924	313.236	197.313	2.70209	0.00267422	0.269407	plastid division protein PDV2 \\ 3.30E-145 \\ 80.13 % \\ GO:0010020-IEA;GO:0016020-IEA;GO:0016021-IEA;GO:0031359-IEA;GO:0009536-IEA \\ chloroplast fission-IEA;membrane-IEA;integral component of membrane-IEA;integral component of chloroplast outer membrane-IEA;plastid-IEA \\ GO:0010020;GO:0031359 \\ chloroplast fission;integral component of chloroplast outer membrane
TRINITY_DN14291_c0_g1	FvH4_6g31650.1	0.73025	1.97	1.23975	2.69771	0.0115868	0.638674	sulfite exporter TauE/SafE family protein 3-like \\ 1.00E-149 \\ 85.41 % \\ GO:0016020-IEA;GO:0016021-IEA \\ membrane-IEA;integral component of membrane-IEA \\ GO:0016021 \\ integral component of membrane		Transmembrane protein TauE-like
TRINITY_DN17587_c1_g1	FvH4_1g01890.1	0.7945	2.14025	1.34575	2.69383	0.00275269	0.2739	uncharacterized methyltransferase At2g41040, chloroplastic \\ 1.20E-62 \\ 78.87 %		Methyltransferase type 11
TRINITY_DN3761_c1_g2	FvH4_3g14660.1	1.13875	3.06725	1.9285	2.69352	0.000443839	0.0952182	L-ascorbate oxidase-like \\ 0.00E+00 \\ 87.83 % \\ GO:0016491-IEA;GO:0046872-IEA;GO:0005507-IEA;GO:0055114-IEA;GO:0005576-IEA \\ oxidoreductase activity-IEA;metal ion binding-IEA;copper ion binding-IEA;oxidation-reduction process-IEA;extracellular region-IEA \\ GO:0005507;GO:0005576;GO:0016491;GO:0055114 \\ copper ion binding;extracellular region;oxidoreductase activity;oxidation-reduction process		Multicopper oxidase, type 1
TRINITY_DN12092_c0_g3	FvH4_1g12790.1	0.828	2.22875	1.40075	2.69173	0.00339681	0.310061	---NA---		Phosphatidic acid phosphatase type 2/haloperoxidase
TRINITY_DN871_c0_g2	FvH4_6g52590.1	2.062	5.5375	3.4755	2.6855	0.00324716	0.301674	---NA--- \\ 1.80E-73 \\ 75.76 % \\ GO:0000166-IEA;GO:0048544-IEA;GO:0016020-IEA;GO:0016021-IEA;GO:0016310-IEA;GO:0004672-IEA;GO:0016740-IEA;GO:0016301-IEA;GO:0004674-IEA;GO:0005524-IEA;GO:0006468-IEA \\ nucleotide binding-IEA;recognition of pollen-IEA;membrane-IEA;integral component of membrane-IEA;phosphorylation-IEA;protein kinase activity-IEA;transferase activity-IEA;kinase activity-IEA;protei…
TRINITY_DN485_c0_g1	FvH4_7g22060.1	9.05525	24.2353	15.18	2.67638	0.000697124	0.120993	dolichyl-diphosphooligosaccharide--protein glycosyltransferase subunit 4A \\ 1.30E-14 \\ 88.37 % \\ GO:0016020-IEA;GO:0016021-IEA;GO:0016740-IEA \\ membrane-IEA;integral component of membrane-IEA;transferase activity-IEA \\ GO:0016021;GO:0016740 \\ integral component of membrane;transferase activity
TRINITY_DN19795_c0_g1	FvH4_1g14710.1	4.85125	12.9648	8.1135	2.67246	0.0001297	0.0475111	B3 domain-containing transcription factor VRN1-like \\ 3.80E-168 \\ 91.61 % \\ GO:0003755-IEA;GO:0005739-IEA;GO:0016020-IEA;GO:0006629-IEA;GO:0016021-IEA;GO:0004609-IEA;GO:0016540-IEA;GO:0031305-IEA;GO:0016831-IEA;GO:0016829-IEA;GO:0008654-IEA;GO:0000413-IEA;GO:0006646-IEA;GO:0005743-IEA;GO:0006457-IEA \\ peptidyl-prolyl cis-trans isomerase activity-IEA;mitochondrion-IEA;membrane-IEA;lipid metabo…		B3 DNA binding domain
TRINITY_DN2916_c1_g1	FvH4_4g02260.1	3.3325	8.89925	5.56675	2.67044	0.000179025	0.0566243	auxin-responsive protein IAA4-like \\ 2.50E-87 \\ 58.21 % \\ GO:0016310-IEA;GO:0016772-IEA \\ phosphorylation-IEA;transferase activity, transferring phosphorus-containing groups-IEA		PB1 domain
TRINITY_DN4895_c0_g1	FvH4_2g25980.1	0.9935	2.653	1.6595	2.67036	0.000197677	0.0594986	pectinesterase-like \\ 0.00E+00 \\ 93.94 % \\ GO:0004857-IEA;GO:0005618-IEA;GO:0043086-IEA;GO:0045330-IEA;GO:0030599-IEA;GO:0045490-IEA;GO:0042545-IEA;GO:0016787-IEA \\ enzyme inhibitor activity-IEA;cell wall-IEA;negative regulation of catalytic activity-IEA;aspartyl esterase activity-IEA;pectinesterase activity-IEA;pectin catabolic process-IEA;cell wall modification-IEA;hydrolase activity-IEA \\…	pectinesterase [EC:3.1.1.11]	Pectinesterase, catalytic
TRINITY_DN3785_c0_g1	FvH4_1g15880.1	2.32375	6.1995	3.87575	2.66789	7.94061e-05	0.0355561	F-box/LRR-repeat protein At3g26922-like \\ 0.00E+00 \\ 69.80 %		F-box domain
TRINITY_DN4674_c0_g1	FvH4_2g36420.1	6.62475	17.657	11.0322	2.66531	0.000123468	0.0463727	PREDICTED: uncharacterized protein LOC101313473 \\ 1.30E-118 \\ 86.45 % \\ GO:0016020-IEA;GO:0016021-IEA \\ membrane-IEA;integral component of membrane-IEA \\ GO:0016021 \\ integral component of membrane		Protein of unknown function DUF599
TRINITY_DN4929_c0_g2	FvH4_4g34120.1	8.807	23.473	14.666	2.66527	7.20012e-06	0.0096862	polygalacturonase At1g48100 \\ 0.00E+00 \\ 64.36 % \\ GO:0008152-IEA;GO:0071555-IEA;GO:0004650-IEA;GO:0005576-IEA;GO:0016798-IEA;GO:0016787-IEA;GO:0005975-IEA \\ metabolic process-IEA;cell wall organization-IEA;polygalacturonase activity-IEA;extracellular region-IEA;hydrolase activity, acting on glycosyl bonds-IEA;hydrolase activity-IEA;carbohydrate metabolic process-IEA \\ GO:0008152;GO:0016798 …		Glycoside hydrolase, family 28
TRINITY_DN11372_c0_g1	FvH4_6g46300.1	3.18575	8.4905	5.30475	2.66515	0.000167587	0.0543376	O-fucosyltransferase 34-like \\ 0.00E+00 \\ 83.54 % \\ GO:0016757-IEA;GO:0005737-IBA;GO:0016020-IEA;GO:0016021-IEA;GO:0006004-IEA;GO:0016740-IEA;GO:0005975-IEA \\ transferase activity, transferring glycosyl groups-IEA;cytoplasm-IBA;membrane-IEA;integral component of membrane-IEA;fucose metabolic process-IEA;transferase activity-IEA;carbohydrate metabolic process-IEA \\ GO:0005737;GO:0006004;GO:00…		GDP-fucose protein O-fucosyltransferase
TRINITY_DN3696_c2_g1	FvH4_2g28370.1	3.3495	8.92125	5.57175	2.66346	0.00119864	0.166186	PREDICTED: uncharacterized protein LOC101314155 \\ 0.00E+00 \\ 88.82 % \\ GO:0016020-IEA;GO:0016021-IEA \\ membrane-IEA;integral component of membrane-IEA \\ GO:0016021 \\ integral component of membrane
TRINITY_DN5103_c0_g1	FvH4_5g29260.1	2.22525	5.91475	3.6895	2.65802	0.000297058	0.0751351	phosphatidylinositol N-acetylglucosaminyltransferase subunit P-like \\ 0.00E+00 \\ 94.00 % \\ GO:0000287-IEA;GO:0016616-IEA;GO:0016491-IEA;GO:0046872-IEA;GO:0051287-IEA;GO:0046982-IEA;GO:0006099-IEA;GO:0006102-IEA;GO:0055114-IEA;GO:0004450-IEA;GO:0005634-IEA \\ magnesium ion binding-IEA;oxidoreductase activity, acting on the CH-OH group of donors, NAD or NADP as acceptor-IEA;oxidoreductase activi…		PIG-P
TRINITY_DN9490_c0_g2	FvH4_6g23670.1	0.386	1.025	0.639	2.65544	0.0354248	0.929067	Galactose-binding domain-like \\ 2.20E-131 \\ 84.17 % \\ GO:0016787-IEA;GO:0004622-IBA \\ hydrolase activity-IEA;lysophospholipase activity-IBA \\ GO:0004622 \\ lysophospholipase activity		Domain of unknown function DUF642
TRINITY_DN744_c0_g2	FvH4_6g10570.1	0.87475	2.31175	1.437	2.64276	0.0333344	0.929067	---NA---
TRINITY_DN387_c1_g1	FvH4_5g02810.1	0.875	2.31225	1.43725	2.64257	0.00464444	0.373017	putative histone deacetylase complex subunit SAP30/SAP30 \\ 1.10E-167 \\ 83.55 %		Histone deacetylase complex subunit SAP30/SAP30-like
TRINITY_DN2085_c0_g2	FvH4_4g34010.1	6.0255	15.9182	9.89275	2.64181	0.0218986	0.929067	---NA---		Cgr1-like
TRINITY_DN1141_c0_g1	FvH4_5g24020.1	3.08625	8.15325	5.067	2.6418	3.83844e-05	0.0236029	E3 ubiquitin-protein ligase ORTHRUS 2-like \\ 0.00E+00 \\ 81.00 % \\ GO:0046872-IEA;GO:0018024-IEA;GO:0016740-IEA;GO:0008168-IEA;GO:0034968-IEA;GO:0016874-IEA;GO:0005634-IEA;GO:0032259-IEA \\ metal ion binding-IEA;histone-lysine N-methyltransferase activity-IEA;transferase activity-IEA;methyltransferase activity-IEA;histone lysine methylation-IEA;ligase activity-IEA;nucleus-IEA;methylation-IEA \\…	E3 ubiquitin-protein ligase UHRF1 [EC:2.3.2.27]	Zinc finger, RING-type
TRINITY_DN531_c0_g1	FvH4_7g14240.1	6.51975	17.1995	10.6798	2.63806	0.000410399	0.0914184	gibberellin 20-oxidase-like protein \\ 5.50E-151 \\ 90.67 % \\ GO:0051213-IEA;GO:0051213-IBA;GO:0047927-IEA;GO:0016491-IEA;GO:0046872-IEA;GO:0055114-IEA;GO:0048767-IBA;GO:0009686-IBA \\ dioxygenase activity-IEA;dioxygenase activity-IBA;gibberellin-44 dioxygenase activity-IEA;oxidoreductase activity-IEA;metal ion binding-IEA;oxidation-reduction process-IEA;root hair elongation-IBA;gibberellin bios…		Oxoglutarate/iron-dependent dioxygenase
TRINITY_DN16913_c0_g1	FvH4_7g01430.1	3.5135	9.224	5.7105	2.6253	8.95021e-05	0.0378749	probable polyamine oxidase 5 \\ 0.00E+00 \\ 84.75 % \\ GO:0052896-IEA;GO:0016491-IEA;GO:0052893-IEA;GO:0055114-IEA;GO:0052903-IEA;GO:0052904-IEA;GO:0052901-IEA;GO:0052902-IEA;GO:0052900-IEA \\ spermidine oxidase (propane-1,3-diamine-forming) activity-IEA;oxidoreductase activity-IEA;N1-acetylspermine:oxygen oxidoreductase (propane-1,3-diamine-forming) activity-IEA;oxidation-reduction process-IEA;N…	spermine oxidase [EC:1.5.3.16 1.5.3.-]	Amine oxidase
TRINITY_DN5780_c0_g1	FvH4_7g10040.1	0.44225	1.15625	0.714	2.61447	0.000582792	0.111033	---NA---		AP2/ERF domain
TRINITY_DN7275_c0_g1	FvH4_6g22840.1	1.07025	2.79775	1.7275	2.61411	0.00450143	0.365909	cytochrome P450 93A3-like \\ 0.00E+00 \\ 77.41 % \\ GO:0005506-IEA;GO:0046872-IEA;GO:0016705-IEA;GO:0016491-IEA;GO:0016020-IEA;GO:0016021-IEA;GO:0020037-IEA;GO:0055114-IEA;GO:0004497-IEA;GO:0047082-IEA \\ iron ion binding-IEA;metal ion binding-IEA;oxidoreductase activity, acting on paired donors, with incorporation or reduction of molecular oxygen-IEA;oxidoreductase activity-IEA;membrane-IEA;inte…		Cytochrome P450
TRINITY_DN10680_c0_g1	FvH4_3g43820.1	1.088	2.8425	1.7545	2.61259	0.0440562	0.929067	G-type lectin S-receptor-like serine/threonine-protein kinase RLK1 \\ 5.90E-33 \\ 67.27 % \\ GO:0005739-IEA;GO:0033819-IEA;GO:0016020-IEA;GO:0016021-IEA;GO:0009249-IEA;GO:0016310-IEA;GO:0006464-IEA;GO:0016740-IEA;GO:0016301-IEA;GO:0030246-IEA \\ mitochondrion-IEA;lipoyl(octanoyl) transferase activity-IEA;membrane-IEA;integral component of membrane-IEA;protein lipoylation-IEA;phosphorylation-IEA;c…
TRINITY_DN1490_c0_g1	FvH4_4g33130.1	11.3197	29.529	18.2093	2.60863	0.000198241	0.0594986	---NA---	arabidopsis histidine kinase 2/3/4 (cytokinin receptor) [EC:2.7.13.3]	Signal transduction response regulator, receiver domain
TRINITY_DN17275_c0_g1	FvH4_7g16960.1	2.4195	6.3065	3.887	2.60653	0.00279292	0.276186	laccase-6 \\ 0.00E+00 \\ 92.45 % \\ GO:0048046-IEA;GO:0046274-IEA;GO:0016491-IEA;GO:0046872-IEA;GO:0005507-IEA;GO:0055114-IEA;GO:0052716-IEA;GO:0005576-IEA;GO:0016722-IBA \\ apoplast-IEA;lignin catabolic process-IEA;oxidoreductase activity-IEA;metal ion binding-IEA;copper ion binding-IEA;oxidation-reduction process-IEA;hydroquinone:oxygen oxidoreductase activity-IEA;extracellular region-IEA;oxido…	laccase [EC:1.10.3.2]	Multicopper oxidase, type 1
TRINITY_DN11744_c0_g1	FvH4_5g01500.1	1.9355	5.0405	3.105	2.60424	0.00169726	0.204169	---NA---		Ubiquitin domain
TRINITY_DN595_c1_g1	FvH4_6g50360.1	4.3855	11.4113	7.02575	2.60204	0.000301797	0.0760217	WAT1-related protein At3g28050-like \\ 4.00E-135 \\ 74.76 % \\ GO:0055085-IEA;GO:0016020-IEA;GO:0016021-IEA;GO:0022857-IEA \\ transmembrane transport-IEA;membrane-IEA;integral component of membrane-IEA;transmembrane transporter activity-IEA \\ GO:0016021;GO:0022857;GO:0055085 \\ integral component of membrane;transmembrane transporter activity;transmembrane transport		EamA domain
TRINITY_DN3073_c1_g1	FvH4_6g33170.1	1.04425	2.71475	1.6705	2.59971	0.00512579	0.395369	3-epi-6-deoxocathasterone 23-monooxygenase \\ 0.00E+00 \\ 89.46 % \\ GO:0005506-IEA;GO:0016491-IEA;GO:0046872-IEA;GO:0016705-IEA;GO:0016020-IEA;GO:0016021-IEA;GO:0020037-IEA;GO:0055114-IEA;GO:0004497-IEA;GO:0102097-IEA \\ iron ion binding-IEA;oxidoreductase activity-IEA;metal ion binding-IEA;oxidoreductase activity, acting on paired donors, with incorporation or reduction of molecular oxygen-IEA;…	3-epi-6-deoxocathasterone 23-monooxygenase [EC:1.14.13.112]	Cytochrome P450
TRINITY_DN2108_c0_g1	FvH4_5g31290.1	1.87025	4.846	2.97575	2.5911	0.0117652	0.645159	putative F-box protein At1g47790 \\ 0.00E+00 \\ 63.76 % \\ GO:0016020-IEA;GO:0016021-IEA;GO:0016874-IEA;GO:0005774-IEA \\ membrane-IEA;integral component of membrane-IEA;ligase activity-IEA;vacuolar membrane-IEA \\ GO:0016021 \\ integral component of membrane
TRINITY_DN33_c3_g1	FvH4_4g03050.1	0.76625	1.98375	1.2175	2.58891	3.69292e-05	0.0230766	AT-hook motif nuclear-localized protein 20-like \\ 8.60E-98 \\ 83.23 % \\ GO:0003677-IEA;GO:0003700-IEA;GO:0006351-IEA;GO:0006355-IEA;GO:0003680-IEA;GO:0005634-IEA \\ DNA binding-IEA;DNA-binding transcription factor activity-IEA;transcription, DNA-templated-IEA;regulation of transcription, DNA-templated-IEA;AT DNA binding-IEA;nucleus-IEA \\ GO:0003680;GO:0003700;GO:0005634;GO:0006355 \\ AT DNA bi…		PPC domain
TRINITY_DN10630_c0_g1	FvH4_2g40810.1	8.43275	21.8302	13.3975	2.58875	0.000748122	0.125942	ethylene-responsive transcription factor ERF003-like \\ 0.00E+00 \\ 78.93 % \\ GO:0055085-IEA;GO:0016020-IEA;GO:0016021-IEA;GO:0008643-IEA;GO:0022857-IEA;GO:0005215-IEA \\ transmembrane transport-IEA;membrane-IEA;integral component of membrane-IEA;carbohydrate transport-IEA;transmembrane transporter activity-IEA;transporter activity-IEA \\ GO:0008643;GO:0016021;GO:0022857;GO:0055085 \\ carbohydra…		AP2/ERF domain
TRINITY_DN5080_c0_g1	FvH4_6g48300.1	3.59825	9.30825	5.71	2.58688	0.000413896	0.0918131	PREDICTED: uncharacterized protein LOC105352454 \\ 2.50E-80 \\ 72.78 % \\ GO:0005737-IBA;GO:0004725-IBA;GO:0035335-IEA;GO:0005634-IBA \\ cytoplasm-IBA;protein tyrosine phosphatase activity-IBA;peptidyl-tyrosine dephosphorylation-IEA;nucleus-IBA \\ GO:0004725;GO:0005634;GO:0005737 \\ protein tyrosine phosphatase activity;nucleus;cytoplasm
TRINITY_DN2896_c0_g1	FvH4_5g00790.1	0.4295	1.11075	0.68125	2.58615	0.00245231	0.254966	deoxyribodipyrimidine photo-lyase \\ 0.00E+00 \\ 90.92 % \\ GO:0006281-IEA;GO:0000719-IEA;GO:0071949-IEA;GO:0003913-IEA;GO:0009650-IEA;GO:0003904-IEA;GO:0016829-IEA \\ DNA repair-IEA;photoreactive repair-IEA;FAD binding-IEA;DNA photolyase activity-IEA;UV protection-IEA;deoxyribodipyrimidine photo-lyase activity-IEA;lyase activity-IEA \\ GO:0000719;GO:0003904;GO:0009650;GO:0071949 \\ photoreactive…	deoxyribodipyrimidine photo-lyase [EC:4.1.99.3]	DNA photolyase, N-terminal
TRINITY_DN3364_c1_g1	FvH4_6g35020.1	6.46325	16.7087	10.2455	2.58519	0.000190042	0.0582464	PREDICTED: uncharacterized protein LOC101303247 \\ 0.00E+00 \\ 62.44 % \\ GO:0008270-IEA;GO:0005509-IEA \\ zinc ion binding-IEA;calcium ion binding-IEA		Protein of unknown function DUF1677, plant
TRINITY_DN1754_c0_g1	FvH4_5g21670.1	4.174	10.7625	6.5885	2.57846	0.00936365	0.563711	NAC domain-containing protein 86 \\ 0.00E+00 \\ 85.59 % \\ GO:0003677-IEA;GO:0006355-IEA;GO:0005634-IEA \\ DNA binding-IEA;regulation of transcription, DNA-templated-IEA;nucleus-IEA \\ GO:0003677;GO:0005634;GO:0006355 \\ DNA binding;nucleus;regulation of transcription, DNA-templated		NAC domain
TRINITY_DN15655_c1_g2	FvH4_2g32510.1	1.00525	2.5905	1.58525	2.57697	0.0275792	0.929067	PREDICTED: uncharacterized protein LOC101296920 \\ 6.70E-108 \\ 94.43 % \\ GO:0016020-IEA;GO:0016021-IEA \\ membrane-IEA;integral component of membrane-IEA \\ GO:0016021 \\ integral component of membrane
TRINITY_DN11711_c0_g1	FvH4_6g10140.1	1.1635	2.9975	1.834	2.57628	0.0170493	0.804841	transcription repressor OFP1 \\ 0.00E+00 \\ 66.11 % \\ GO:0003677-IEA;GO:0016020-IEA;GO:0045892-IEA;GO:0016021-IEA \\ DNA binding-IEA;membrane-IEA;negative regulation of transcription, DNA-templated-IEA;integral component of membrane-IEA \\ GO:0003677;GO:0045892 \\ DNA binding;negative regulation of transcription, DNA-templated		Ovate protein family, C-terminal
TRINITY_DN198_c1_g2	FvH4_1g25520.1	0.75225	1.935	1.18275	2.57228	0.00351083	0.315513	serine-rich adhesin for platelets \\ 0.00E+00 \\ 61.35 %
TRINITY_DN14249_c0_g1	FvH4_5g18810.1	1.28375	3.29725	2.0135	2.56845	0.000629366	0.114659	---NA---		Histidine triad (HIT) protein
TRINITY_DN1927_c3_g1	FvH4_7g28480.1	1.85375	4.73975	2.886	2.55684	0.0041428	0.347569	---NA---	alpha-L-fucosidase [EC:3.2.1.51]	Glycoside hydrolase, family 29
TRINITY_DN380_c0_g1	FvH4_6g22320.1	1.8215	4.65675	2.83525	2.55655	0.00577705	0.42206	---NA---
TRINITY_DN16935_c0_g1	FvH4_4g03500.1	1.66125	4.24625	2.585	2.55606	0.0223748	0.929067	gibberellin-regulated protein 14-like \\ 2.50E-157 \\ 75.50 %
TRINITY_DN11065_c0_g1	FvH4_4g35770.1	0.787	2.00875	1.22175	2.55241	0.00778484	0.504453	PREDICTED: uncharacterized protein LOC105351394 \\ 6.10E-83 \\ 54.56 %		No apical meristem-associated, C-terminal domain
TRINITY_DN9502_c0_g1	FvH4_7g08840.1	0.72875	1.8595	1.13075	2.55163	0.00677538	0.463637	putative CAP domain-containing protein \\ 4.50E-91 \\ 66.36 % \\ GO:0016779-IEA;GO:0003964-IEA;GO:0090502-IEA;GO:0005739-IEA;GO:0006278-IEA;GO:0016740-IEA;GO:0004523-IEA;GO:0003676-IEA \\ nucleotidyltransferase activity-IEA;RNA-directed DNA polymerase activity-IEA;RNA phosphodiester bond hydrolysis, endonucleolytic-IEA;mitochondrion-IEA;RNA-dependent DNA biosynthetic process-IEA;transferase activ…		CAP superfamily
TRINITY_DN10750_c0_g2	FvH4_5g12980.1	3.927	10.0175	6.0905	2.55093	0.00847894	0.529306	putative tetratricopeptide-like helical domain-containing protein \\ 1.80E-71 \\ 96.23 % \\ GO:0016020-IEA;GO:0016021-IEA \\ membrane-IEA;integral component of membrane-IEA \\ GO:0016021 \\ integral component of membrane		Sel1-like repeat
TRINITY_DN3757_c0_g3	FvH4_3g29030.1	38.5607	98.05	59.4892	2.54274	0.000166926	0.0543028	---NA---
TRINITY_DN171398_c0_g1	FvH4_5g20940.1	3.27625	8.32275	5.0465	2.54033	7.88735e-05	0.0355216	putative invertase inhibitor		Pectinesterase inhibitor domain
TRINITY_DN429_c0_g2	FvH4_2g11350.1	1.98225	5.02075	3.0385	2.53285	0.000113697	0.0444063	glutamate receptor 2.8-like \\ 0.00E+00 \\ 82.22 % \\ GO:0035235-IEA;GO:0016020-IEA;GO:0016021-IEA;GO:0004970-IEA;GO:0006811-IEA \\ ionotropic glutamate receptor signaling pathway-IEA;membrane-IEA;integral component of membrane-IEA;ionotropic glutamate receptor activity-IEA;ion transport-IEA \\ GO:0004970;GO:0006811;GO:0016021;GO:0035235 \\ ionotropic glutamate receptor activity;ion transport;int…	glutamate receptor, ionotropic, plant	Ionotropic glutamate receptor
TRINITY_DN16721_c0_g3	FvH4_1g03530.1	0.94725	2.39675	1.4495	2.53022	0.00067364	0.11852	putative kelch-type beta propeller		Protein of unknown function DUF1677, Oryza sativa
TRINITY_DN7011_c0_g1	FvH4_5g13420.1	16.2085	40.9883	24.7797	2.52881	0.0158668	0.771477	isoaspartyl peptidase/L-asparaginase 1 \\ 0.00E+00 \\ 93.09 % \\ GO:0008299-IEA;GO:0016020-IEA;GO:0016021-IEA;GO:0004452-IEA;GO:0016787-IEA \\ isoprenoid biosynthetic process-IEA;membrane-IEA;integral component of membrane-IEA;isopentenyl-diphosphate delta-isomerase activity-IEA;hydrolase activity-IEA \\ GO:0004452;GO:0008299;GO:0016021;GO:0016787 \\ isopentenyl-diphosphate delta-isomerase activi…	beta-aspartyl-peptidase (threonine type) [EC:3.4.19.5]	Peptidase T2, asparaginase 2
TRINITY_DN4020_c0_g2	FvH4_1g25640.1	1.38425	3.49425	2.11	2.52429	0.000245854	0.0672776	ultraviolet-B receptor UVR8 isoform X1 \\ 0.00E+00 \\ 73.26 %		Regulator of chromosome condensation, RCC1
TRINITY_DN4049_c0_g1	FvH4_6g47290.1	11.825	29.673	17.848	2.50934	0.00688044	0.467916	protein EXORDIUM-like 5 \\ 0.00E+00 \\ 92.21 %		Protein EXORDIUM-like
TRINITY_DN3700_c0_g1	FvH4_3g02440.1	1.26	3.154	1.894	2.50317	0.000858746	0.137075	probable serine/threonine-protein kinase PBL23 \\ 0.00E+00 \\ 78.67 % \\ GO:0000166-IEA;GO:0016310-IEA;GO:0016740-IEA;GO:0004672-IEA;GO:0016301-IEA;GO:0004674-IEA;GO:0005524-IEA;GO:0006468-IEA \\ nucleotide binding-IEA;phosphorylation-IEA;transferase activity-IEA;protein kinase activity-IEA;kinase activity-IEA;protein serine/threonine kinase activity-IEA;ATP binding-IEA;protein phosphorylation-IE…		Protein kinase domain
TRINITY_DN2110_c1_g2	FvH4_5g08690.1	5.89025	14.725	8.83475	2.49989	0.00672109	0.461664	11-beta-hydroxysteroid dehydrogenase 1B-like \\ 0.00E+00 \\ 85.16 % \\ GO:0016491-IEA;GO:0016020-IEA;GO:0016021-IEA;GO:0055114-IEA \\ oxidoreductase activity-IEA;membrane-IEA;integral component of membrane-IEA;oxidation-reduction process-IEA \\ GO:0016021;GO:0016491;GO:0055114 \\ integral component of membrane;oxidoreductase activity;oxidation-reduction process		Short-chain dehydrogenase/reductase SDR
TRINITY_DN10816_c0_g1	FvH4_6g32430.1	4.787	11.9483	7.16125	2.49598	0.000478655	0.0988332	---NA---		Protein kinase domain
TRINITY_DN8102_c0_g1	FvH4_7g10710.1	5.8195	14.5073	8.68775	2.49287	0.0249777	0.929067	putative chromatin regulator PHD family \\ 3.00E-116 \\ 60.44 % \\ GO:0016020-IEA;GO:0016021-IEA \\ membrane-IEA;integral component of membrane-IEA \\ GO:0016021 \\ integral component of membrane		Zinc finger, FYVE/PHD-type
TRINITY_DN5804_c0_g1	FvH4_5g14950.1	2.9605	7.38	4.4195	2.49282	0.0289214	0.929067	gibberellin-regulated protein 6 \\ 6.40E-103 \\ 75.14 % \\ GO:0000166-IEA;GO:0005737-IBA;GO:0043066-IEA;GO:0016310-IEA;GO:0016740-IEA;GO:0016301-IEA;GO:0035556-IBA;GO:0030587-N/A;GO:0005575-ND;GO:0004672-IEA;GO:0004674-IEA;GO:0004674-IBA;GO:0005634-IBA;GO:0005524-IEA;GO:0006468-IEA;GO:0006468-IBA \\ nucleotide binding-IEA;cytoplasm-IBA;negative regulation of apoptotic process-IEA;phosphorylation-…
TRINITY_DN4985_c0_g2	FvH4_7g13460.1	3.43825	8.56125	5.123	2.49	0.00107531	0.155167	putative HotDog domain-containing protein \\ 7.30E-95 \\ 80.86 % \\ GO:0047617-IEA;GO:0047617-IBA \\ acyl-CoA hydrolase activity-IEA;acyl-CoA hydrolase activity-IBA \\ GO:0047617 \\ acyl-CoA hydrolase activity		Thioesterase domain
TRINITY_DN2434_c0_g1	FvH4_2g14040.1	0.8875	2.209	1.3215	2.48901	0.0360324	0.929067	---NA---		Toll/interleukin-1 receptor homology (TIR) domain
TRINITY_DN804_c3_g1	FvH4_1g17110.1	3.3435	8.317	4.9735	2.48751	0.00170329	0.204799	probable esterase KAI2 \\ 0.00E+00 \\ 89.84 % \\ GO:0052689-IEA;GO:0016787-IEA \\ carboxylic ester hydrolase activity-IEA;hydrolase activity-IEA \\ GO:0052689 \\ carboxylic ester hydrolase activity		Alpha/beta hydrolase fold-1
TRINITY_DN241040_c0_g1	FvH4_6g10240.1	2.1625	5.362	3.1995	2.47954	0.00481941	0.381479	---NA---
TRINITY_DN8373_c0_g1	FvH4_7g10850.1	1.36325	3.3795	2.01625	2.479	0.0346972	0.929067	cyclin-U2-1-like isoform X1 \\ 8.80E-08 \\ 98.42 % \\ GO:0000254-IBA;GO:0005789-IBA;GO:0005506-IEA;GO:0016491-IEA;GO:0080065-IBA;GO:0016020-IEA;GO:0016021-IEA;GO:0008610-IEA;GO:0055114-IEA;GO:0004497-IEA;GO:0016126-IBA \\ C-4 methylsterol oxidase activity-IBA;endoplasmic reticulum membrane-IBA;iron ion binding-IEA;oxidoreductase activity-IEA;4-alpha-methyl-delta7-sterol oxidation-IBA;membrane-IEA…		Cyclin P/U
TRINITY_DN1239_c0_g1	FvH4_1g20700.1	2.45125	6.07475	3.6235	2.47823	0.000428523	0.0932969	tubulin-folding cofactor C \\ 0.00E+00 \\ 79.25 % \\ GO:0000166-IEA;GO:0005525-IEA;GO:0015631-IEA;GO:0005737-IEA;GO:0007023-IEA;GO:0000902-IEA;GO:0000226-IEA \\ nucleotide binding-IEA;GTP binding-IEA;tubulin binding-IEA;cytoplasm-IEA;post-chaperonin tubulin folding pathway-IEA;cell morphogenesis-IEA;microtubule cytoskeleton organization-IEA \\ GO:0000902;GO:0005525;GO:0007023;GO:0015631 \\ cell m…		CARP motif
TRINITY_DN1344_c0_g1	FvH4_5g37820.1	15.4962	38.3728	22.8765	2.47626	0.00759366	0.496743	---NA---	EREBP-like factor	AP2/ERF domain
TRINITY_DN109847_c0_g1	FvH4_1g01540.1	6.78575	16.7848	9.999	2.47353	2.90643e-05	0.0201663	serine/threonine-protein phosphatase 4 regulatory subunit 2 \\ 2.30E-64 \\ 79.88 % \\ GO:0003735-IEA;GO:0090502-IEA;GO:0019843-IEA;GO:0005840-IEA;GO:0004523-IEA;GO:0006412-IEA;GO:0016787-IEA;GO:0003676-IEA \\ structural constituent of ribosome-IEA;RNA phosphodiester bond hydrolysis, endonucleolytic-IEA;rRNA binding-IEA;ribosome-IEA;RNA-DNA hybrid ribonuclease activity-IEA;translation-IEA;hydrolas…	small subunit ribosomal protein S6	Ribosomal protein S6
TRINITY_DN10693_c0_g1	FvH4_3g20040.1	2.641	6.5285	3.8875	2.47198	0.00222823	0.240101	PREDICTED: uncharacterized protein LOC101303689 \\ 0.00E+00 \\ 71.59 % \\ GO:0016020-IEA;GO:0016021-IEA \\ membrane-IEA;integral component of membrane-IEA \\ GO:0016021 \\ integral component of membrane		Protein of unknown function DUF2921
TRINITY_DN3282_c0_g1	FvH4_6g13640.1	6.28275	15.51	9.22725	2.46866	6.92837e-05	0.0330634	transcription factor AS1 \\ 0.00E+00 \\ 91.08 % \\ GO:0003677-IEA;GO:0006351-IEA;GO:0010338-IEA;GO:0005634-IEA \\ DNA binding-IEA;transcription, DNA-templated-IEA;leaf formation-IEA;nucleus-IEA \\ GO:0003677;GO:0005634;GO:0006351;GO:0010338 \\ DNA binding;nucleus;transcription, DNA-templated;leaf formation	transcription factor MYB, plant	SANT/Myb domain
TRINITY_DN9954_c0_g1	FvH4_6g22390.1	0.73625	1.8165	1.08025	2.46723	0.0283399	0.929067	VQ motif-containing protein 25 \\ 5.80E-130 \\ 69.18 % \\ GO:0003677-IEA \\ DNA binding-IEA		VQ
TRINITY_DN34836_c1_g1	FvH4_2g05560.1	1.9005	4.6835	2.783	2.46435	0.00360984	0.320428	protein IRX15-LIKE-like \\ 0.00E+00 \\ 89.70 % \\ GO:0052689-IEA;GO:0016787-IEA \\ carboxylic ester hydrolase activity-IEA;hydrolase activity-IEA \\ GO:0052689 \\ carboxylic ester hydrolase activity		IRX15/IRX15L/IGXM
TRINITY_DN3893_c0_g3	FvH4_1g16970.1	2.7505	6.7725	4.022	2.46228	0.00124415	0.170501	zinc finger protein 7-like \\ 0.00E+00 \\ 85.88 % \\ GO:0016020-IEA;GO:0016021-IEA;GO:0008643-IEA;GO:0005886-IEA \\ membrane-IEA;integral component of membrane-IEA;carbohydrate transport-IEA;plasma membrane-IEA \\ GO:0005886;GO:0008643;GO:0016021 \\ plasma membrane;carbohydrate transport;integral component of membrane		Zinc finger C2H2-type
TRINITY_DN2836_c0_g1	FvH4_7g09150.1	0.6825	1.68	0.9975	2.46154	0.0234238	0.929067	rac-like GTP-binding protein ARAC4 isoform X2 \\ 2.40E-151 \\ 94.02 % \\ GO:0070084-IEA;GO:0008233-IEA;GO:0046872-IEA;GO:0006508-IEA;GO:0070006-IEA;GO:0008235-IEA;GO:0004177-IEA;GO:0016787-IEA \\ protein initiator methionine removal-IEA;peptidase activity-IEA;metal ion binding-IEA;proteolysis-IEA;metalloaminopeptidase activity-IEA;metalloexopeptidase activity-IEA;aminopeptidase activity-IEA;hydro…	Ras-related C3 botulinum toxin substrate 1	Small GTPase superfamily
TRINITY_DN2932_c0_g1	FvH4_1g07100.1	2.4235	5.95875	3.53525	2.45874	0.00171972	0.205512	---NA---	pyridoxal phosphate phosphatase PHOSPHO2 [EC:3.1.3.74]	Pyridoxal phosphate phosphatase-related
TRINITY_DN4511_c1_g1	FvH4_3g16190.1	0.59725	1.46575	0.8685	2.45416	0.00439661	0.361094	serine/threonine-protein kinase WAG1 \\ 0.00E+00 \\ 78.46 % \\ GO:0016310-IEA;GO:0004672-IEA;GO:0016740-IEA;GO:0016301-IEA;GO:0005524-IEA;GO:0006468-IEA \\ phosphorylation-IEA;protein kinase activity-IEA;transferase activity-IEA;kinase activity-IEA;ATP binding-IEA;protein phosphorylation-IEA \\ GO:0004672;GO:0005524;GO:0006468 \\ protein kinase activity;ATP binding;protein phosphorylation		Protein kinase domain
TRINITY_DN5793_c0_g1	FvH4_3g36370.1	1.9805	4.85575	2.87525	2.45178	0.0045902	0.370572	F-box protein At3g07870-like \\ 9.00E-149 \\ 67.74 %
TRINITY_DN6208_c0_g1	FvH4_7g31810.1	0.987	2.4155	1.4285	2.44732	0.0365383	0.929067	probable protein phosphatase 2C 51 \\ 3.90E-98 \\ 72.68 % \\ GO:0004722-IEA;GO:0046872-IEA;GO:0003824-IEA;GO:0006470-IEA;GO:0043169-IEA;GO:0004721-IEA;GO:0016787-IEA \\ protein serine/threonine phosphatase activity-IEA;metal ion binding-IEA;catalytic activity-IEA;protein dephosphorylation-IEA;cation binding-IEA;phosphoprotein phosphatase activity-IEA;hydrolase activity-IEA \\ GO:0004722;GO:000647…	protein phosphatase 2C [EC:3.1.3.16]	PPM-type phosphatase, divalent cation binding
TRINITY_DN734_c1_g1	FvH4_6g36030.1	3.27075	7.99725	4.7265	2.44508	6.77473e-07	0.00348052	putative cystatin \\ 4.00E-142 \\ 86.83 % \\ GO:0016787-IEA \\ hydrolase activity-IEA \\ GO:0016787 \\ hydrolase activity		Cystatin
TRINITY_DN262841_c0_g1	FvH4_1g04770.1	2.37825	5.80925	3.431	2.44266	0.00123249	0.169431	transcription repressor OFP8 \\ 0.00E+00 \\ 90.40 % \\ GO:0005978-IEA;GO:0003824-IEA;GO:0005980-IEA;GO:0005980-IBA;GO:0004134-IEA;GO:0004134-IBA;GO:0004135-IEA;GO:0004135-IBA;GO:0016787-IEA \\ glycogen biosynthetic process-IEA;catalytic activity-IEA;glycogen catabolic process-IEA;glycogen catabolic process-IBA;4-alpha-glucanotransferase activity-IEA;4-alpha-glucanotransferase activity-IBA;amylo-a…		Ovate protein family, C-terminal
TRINITY_DN8031_c1_g1	FvH4_5g09900.1	0.6015	1.4685	0.867	2.4414	0.000328897	0.0800975	---NA---		Pentatricopeptide repeat
TRINITY_DN3258_c0_g1	FvH4_3g09320.1	0.68425	1.66425	0.98	2.43223	0.0116067	0.639427	DNA ligase 1 isoform X1 \\ 0.00E+00 \\ 87.35 % \\ GO:0016491-IEA;GO:0005509-IEA;GO:0009523-IEA;GO:0055114-IEA;GO:0009654-IEA;GO:0015979-IEA;GO:0019898-IEA \\ oxidoreductase activity-IEA;calcium ion binding-IEA;photosystem II-IEA;oxidation-reduction process-IEA;photosystem II oxygen evolving complex-IEA;photosynthesis-IEA;extrinsic component of membrane-IEA \\ GO:0005509;GO:0009654;GO:0015979;GO:0…		Blc2-like superfamily
TRINITY_DN2614_c0_g2	FvH4_5g03040.1	7.04325	17.1262	10.083	2.43158	1.33102e-05	0.0130928	probable polygalacturonase isoform X2 \\ 8.90E-179 \\ 93.30 % \\ GO:0008152-IEA;GO:0047911-IEA;GO:0071555-IEA;GO:0004650-IEA;GO:0005576-IEA;GO:0016787-IEA;GO:0005975-IEA;GO:0016798-IEA \\ metabolic process-IEA;galacturan 1,4-alpha-galacturonidase activity-IEA;cell wall organization-IEA;polygalacturonase activity-IEA;extracellular region-IEA;hydrolase activity-IEA;carbohydrate metabolic process-IE…		Glycoside hydrolase, family 28
TRINITY_DN6947_c0_g1	FvH4_3g33040.1	2.67525	6.492	3.81675	2.42669	0.0024213	0.252904	---NA---
TRINITY_DN8737_c0_g1	FvH4_6g51910.1	1.95675	4.74675	2.79	2.42583	0.000313666	0.0778027	---NA---		GDSL lipase/esterase
TRINITY_DN3150_c0_g1	FvH4_2g08250.1	2.44125	5.92025	3.479	2.42509	0.000495525	0.100697	deSI-like protein At4g17486 \\ 1.00E-112 \\ 91.45 % \\ GO:0016020-IEA;GO:0016021-IEA \\ membrane-IEA;integral component of membrane-IEA \\ GO:0016021 \\ integral component of membrane		PPPDE putative peptidase domain
TRINITY_DN7302_c0_g1	FvH4_3g02630.1	2.67525	6.4525	3.77725	2.41192	0.00155523	0.19548	probable xyloglucan endotransglucosylase/hydrolase protein 8 \\ 7.50E-84 \\ 97.86 % \\ GO:0048046-IEA;GO:0005618-IEA;GO:0071555-IEA;GO:0016740-IEA;GO:0016762-IEA;GO:0016798-IEA;GO:0016787-IEA;GO:0010411-IEA;GO:0008152-IEA;GO:0006073-IEA;GO:0016757-IEA;GO:0005576-IEA;GO:0004553-IEA;GO:0005975-IEA;GO:0042546-IEA \\ apoplast-IEA;cell wall-IEA;cell wall organization-IEA;transferase activity-IEA;xylog…	xyloglucan:xyloglucosyl transferase [EC:2.4.1.207]	Glycoside hydrolase family 16
TRINITY_DN17470_c0_g2	FvH4_3g08180.1	1.721	4.15025	2.42925	2.41153	0.0279259	0.929067	sodium/calcium exchanger NCL1-like \\ 0.00E+00 \\ 79.91 % \\ GO:0055085-IEA;GO:0016020-IEA;GO:0005509-IEA;GO:0016021-IEA \\ transmembrane transport-IEA;membrane-IEA;calcium ion binding-IEA;integral component of membrane-IEA \\ GO:0005509;GO:0016021;GO:0055085 \\ calcium ion binding;integral component of membrane;transmembrane transport		EF-hand domain
TRINITY_DN7151_c0_g1	FvH4_6g40100.1	4.2435	10.23	5.9865	2.41075	0.00531164	0.40302	---NA---		Cytochrome b5-like heme/steroid binding domain
TRINITY_DN16152_c0_g1	FvH4_7g16430.1	2.19625	5.293	3.09675	2.41002	0.00230473	0.245511	cytochrome b561 and DOMON domain-containing protein At3g61750 \\ 0.00E+00 \\ 85.14 % \\ GO:0016020-IEA;GO:0016021-IEA;GO:0055114-IEA \\ membrane-IEA;integral component of membrane-IEA;oxidation-reduction process-IEA \\ GO:0016021;GO:0055114 \\ integral component of membrane;oxidation-reduction process		DOMON domain
TRINITY_DN23247_c0_g1	FvH4_3g00570.1	6.153	14.8038	8.65075	2.40594	0.0239516	0.929067	PLASMODESMATA CALLOSE-BINDING PROTEIN 5-like		X8 domain
TRINITY_DN9578_c0_g1	FvH4_1g06610.1	4.68175	11.2505	6.56875	2.40305	0.00456073	0.369303	gamma-glutamyltranspeptidase 3 \\ 0.00E+00 \\ 90.12 % \\ GO:0006749-IBA;GO:0016020-IEA;GO:0006508-IEA;GO:0016021-IEA;GO:0019344-IBA;GO:0016740-IEA;GO:0016787-IEA;GO:0016746-IEA;GO:0036374-IEA;GO:0036374-IBA;GO:0006751-IEA;GO:0006751-IBA;GO:0006520-IBA;GO:0006536-IBA;GO:0006412-IEA;GO:0000048-IBA \\ glutathione metabolic process-IBA;membrane-IEA;proteolysis-IEA;integral component of membrane-IEA;c…	gamma-glutamyltranspeptidase / glutathione hydrolase / leukotriene-C4 hydrolase [EC:2.3.2.2 3.4.19.13 3.4.19.14]	Gamma-glutamyltranspeptidase
TRINITY_DN4433_c0_g1	FvH4_2g03880.1	9.96725	23.947	13.9797	2.40257	0.00369472	0.325336	---NA--- \\ 0.00E+00 \\ 95.96 % \\ GO:0050662-IEA;GO:0003824-IEA;GO:0016491-IEA;GO:0045552-IEA;GO:0055114-IEA \\ coenzyme binding-IEA;catalytic activity-IEA;oxidoreductase activity-IEA;dihydrokaempferol 4-reductase activity-IEA;oxidation-reduction process-IEA \\ GO:0045552;GO:0050662;GO:0055114 \\ dihydrokaempferol 4-reductase activity;coenzyme binding;oxidation-reduction process
TRINITY_DN409_c0_g1	FvH4_6g12450.1	4.78175	11.4868	6.705	2.40221	0.00092552	0.142199	E3 ubiquitin-protein ligase MARCH2-like \\ 2.90E-78 \\ 76.24 % \\ GO:0008270-IEA;GO:0046872-IEA;GO:0016020-IEA;GO:0016021-IEA;GO:0009055-IEA;GO:0020037-IEA;GO:0009555-IEA;GO:0022900-IEA;GO:0016874-IEA \\ zinc ion binding-IEA;metal ion binding-IEA;membrane-IEA;integral component of membrane-IEA;electron transfer activity-IEA;heme binding-IEA;pollen development-IEA;electron transport chain-IEA;liga…		Zinc finger, RING-CH-type
TRINITY_DN4968_c2_g1	FvH4_7g25530.1	124.189	298.148	173.959	2.40076	7.36344e-06	0.00969425	hypoxia-responsive family protein \\ 0.00E+00 \\ 87.66 % \\ GO:0055085-IEA;GO:0016020-IEA;GO:0016021-IEA;GO:0022857-IEA \\ transmembrane transport-IEA;membrane-IEA;integral component of membrane-IEA;transmembrane transporter activity-IEA \\ GO:0016021;GO:0022857;GO:0055085 \\ integral component of membrane;transmembrane transporter activity;transmembrane transport
TRINITY_DN9902_c0_g1	FvH4_2g24740.1	1.7295	4.152	2.4225	2.40069	0.000501204	0.101131	---NA---		Peptidase S1C
TRINITY_DN1738_c0_g2	FvH4_6g39020.1	0.7845	1.883	1.0985	2.40025	0.00459581	0.370623	wall-associated receptor kinase-like 22 \\ 0.00E+00 \\ 75.82 % \\ GO:0016020-IEA;GO:0016021-IEA;GO:0016740-IEA;GO:0004672-IEA;GO:0030247-IEA;GO:0005524-IEA;GO:0006468-IEA \\ membrane-IEA;integral component of membrane-IEA;transferase activity-IEA;protein kinase activity-IEA;polysaccharide binding-IEA;ATP binding-IEA;protein phosphorylation-IEA \\ GO:0004672;GO:0005524;GO:0006468;GO:0016021;GO:003…		Protein kinase domain
TRINITY_DN198957_c0_g1	FvH4_1g12780.1	2.1295	5.109	2.9795	2.39915	0.0235016	0.929067	TRNA--methyltransferase non-catalytic subunit trm6MTase subunit trm6, putative
TRINITY_DN273_c0_g1	FvH4_2g13320.1	6.2135	14.9042	8.69075	2.39869	0.00730146	0.484566	NAC domain-containing protein 82-like \\ 0.00E+00 \\ 75.00 % \\ GO:0003677-IEA;GO:0016020-IEA;GO:0016021-IEA;GO:0006355-IEA;GO:0005634-IEA \\ DNA binding-IEA;membrane-IEA;integral component of membrane-IEA;regulation of transcription, DNA-templated-IEA;nucleus-IEA \\ GO:0003677;GO:0005634;GO:0006355;GO:0016021 \\ DNA binding;nucleus;regulation of transcription, DNA-templated;integral component of…		NAC domain
TRINITY_DN10257_c0_g1	FvH4_5g09850.1	2.78925	6.668	3.87875	2.39061	0.00291565	0.282994	putative transcription factor C2H2 family \\ 2.40E-152 \\ 60.73 % \\ GO:0016746-IEA;GO:0008270-IEA;GO:0046872-IEA;GO:0016020-IEA;GO:0004839-IEA;GO:0016021-IEA;GO:0016740-IEA;GO:0016874-IEA;GO:0016567-IEA \\ transferase activity, transferring acyl groups-IEA;zinc ion binding-IEA;metal ion binding-IEA;membrane-IEA;ubiquitin activating enzyme activity-IEA;integral component of membrane-IEA;transfera…		Zinc finger, RING-type
TRINITY_DN168039_c0_g1	FvH4_6g13070.1	16.1968	38.674	22.4772	2.38776	0.00159352	0.197552	S-crystallin like \\ 0.00E+00 \\ 59.24 % \\ GO:0016746-IEA;GO:0008270-IEA;GO:0046872-IEA;GO:0016020-IEA;GO:0004839-IEA;GO:0016021-IEA;GO:0016740-IEA;GO:0016874-IEA;GO:0016567-IEA \\ transferase activity, transferring acyl groups-IEA;zinc ion binding-IEA;metal ion binding-IEA;membrane-IEA;ubiquitin activating enzyme activity-IEA;integral component of membrane-IEA;transferase activity-IEA;ligase ac…
TRINITY_DN767_c0_g2	FvH4_3g38140.1	4.15775	9.92575	5.768	2.38729	0.000155597	0.0523304	laccase-4-like \\ 0.00E+00 \\ 91.13 % \\ GO:0046274-IEA;GO:0048046-IEA;GO:0016491-IEA;GO:0046872-IEA;GO:0005507-IEA;GO:0055114-IEA;GO:0052716-IEA;GO:0005576-IEA \\ lignin catabolic process-IEA;apoplast-IEA;oxidoreductase activity-IEA;metal ion binding-IEA;copper ion binding-IEA;oxidation-reduction process-IEA;hydroquinone:oxygen oxidoreductase activity-IEA;extracellular region-IEA \\ GO:0005507;G…	laccase [EC:1.10.3.2]	Multicopper oxidase, type 1
TRINITY_DN12020_c0_g1	FvH4_6g40000.1	1.46175	3.489	2.02725	2.38687	0.00657425	0.457034	putative F-box domain-containing protein \\ 0.00E+00 \\ 70.39 %		F-box domain
TRINITY_DN13841_c0_g1	FvH4_4g14500.1	1.88825	4.49075	2.6025	2.37826	0.000634787	0.115359	probable E3 ubiquitin-protein ligase LUL4 \\ 1.00E-52 \\ 92.30 % \\ GO:0003723-IBA;GO:0003735-IEA;GO:0003735-IBA;GO:0002181-IBA;GO:0016020-IEA;GO:0016021-IEA;GO:0022625-IBA;GO:0005840-IEA;GO:0006412-IEA;GO:0005622-IEA \\ RNA binding-IBA;structural constituent of ribosome-IEA;structural constituent of ribosome-IBA;cytoplasmic translation-IBA;membrane-IEA;integral component of membrane-IEA;cytosoli…
TRINITY_DN2900_c0_g1	FvH4_6g12650.1	5.0045	11.8763	6.87175	2.37311	6.40122e-06	0.00929693	---NA---
TRINITY_DN745_c1_g1	FvH4_6g33130.1	4.481	10.627	6.146	2.37157	0.0385198	0.929067	---NA---	PRA1 family protein 1	Prenylated rab acceptor PRA1
TRINITY_DN1305_c0_g1	FvH4_5g05670.1	0.85375	2.02225	1.1685	2.36867	0.000664057	0.117452	---NA---		Pentatricopeptide repeat
TRINITY_DN8735_c0_g1	FvH4_4g04040.1	3.39075	8.01225	4.6215	2.36297	3.65228e-05	0.0229243	phosphate transporter PHO1 \\ 0.00E+00 \\ 92.00 % \\ GO:0015114-IEA;GO:0005802-IEA;GO:0048016-IEA;GO:0016020-IEA;GO:0016021-IEA;GO:0006817-IEA;GO:0000822-IEA;GO:0005794-IEA;GO:0016036-IEA;GO:0006799-IEA;GO:0035435-IEA;GO:0005886-IEA \\ phosphate ion transmembrane transporter activity-IEA;trans-Golgi network-IEA;inositol phosphate-mediated signaling-IEA;membrane-IEA;integral component of membrane-…		SPX domain
TRINITY_DN10272_c0_g1	FvH4_3g08680.1	0.8535	2.0155	1.162	2.36145	0.0304458	0.929067	PREDICTED: uncharacterized protein At3g17950-like
TRINITY_DN5045_c0_g1	FvH4_1g10900.1	0.684	1.615	0.931	2.36111	0.00376786	0.329278	UPF0548 protein At2g17695 \\ 1.90E-11 \\ 93.66 % \\ GO:0016740-IEA;GO:0008168-IEA;GO:0032259-IEA \\ transferase activity-IEA;methyltransferase activity-IEA;methylation-IEA \\ GO:0008168;GO:0032259 \\ methyltransferase activity;methylation		Domain of unknown function DUF1990
TRINITY_DN22479_c0_g2	FvH4_6g45030.1	2.405	5.67775	3.27275	2.36081	0.0011475	0.162087	---NA---		Putative cell wall protein
TRINITY_DN2275_c0_g1	FvH4_7g30880.1	6.454	15.2353	8.78125	2.36059	0.00978551	0.577846	hydroxyproline O-galactosyltransferase HPGT1 \\ 0.00E+00 \\ 89.01 % \\ GO:0016757-IEA;GO:0016020-IEA;GO:0016021-IEA;GO:0008378-IEA;GO:0006486-IEA;GO:0005794-IEA;GO:0000139-IEA;GO:0016740-IEA \\ transferase activity, transferring glycosyl groups-IEA;membrane-IEA;integral component of membrane-IEA;galactosyltransferase activity-IEA;protein glycosylation-IEA;Golgi apparatus-IEA;Golgi membrane-IEA;tr…	hydroxyproline O-galactosyltransferase HPGT [EC:2.4.1.-]	Glycosyl transferase, family 31
TRINITY_DN774_c0_g2	FvH4_6g02260.1	31.8792	75.081	43.2018	2.35517	0.00147593	0.188355	---NA---
TRINITY_DN10673_c0_g1	FvH4_5g04840.1	0.6985	1.643	0.9445	2.35218	0.0121502	0.658407	calcineurin B-like protein 7 \\ 1.90E-139 \\ 91.95 % \\ GO:0016020-IEA;GO:0005509-IEA \\ membrane-IEA;calcium ion binding-IEA \\ GO:0005509;GO:0016020 \\ calcium ion binding;membrane	serine/threonine-protein phosphatase 2B regulatory subunit	EF-hand domain
TRINITY_DN10105_c0_g1	FvH4_3g29370.1	8.7355	20.4765	11.741	2.34406	0.00550732	0.41061	PREDICTED: uncharacterized protein LOC101295300 \\ 9.30E-06 \\ 98.15 % \\ GO:0032041-IEA;GO:0004407-IEA;GO:0016575-IEA;GO:0016787-IEA;GO:0070932-IEA \\ NAD-dependent histone deacetylase activity (H3-K14 specific)-IEA;histone deacetylase activity-IEA;histone deacetylation-IEA;hydrolase activity-IEA;histone H3 deacetylation-IEA
TRINITY_DN7184_c0_g1	FvH4_1g01050.1	5.3315	12.4703	7.13875	2.33898	0.00309451	0.292971	reticulon-like protein B21 \\ 0.00E+00 \\ 80.54 % \\ GO:0005789-IEA;GO:0016020-IEA;GO:0016021-IEA;GO:0005783-IEA \\ endoplasmic reticulum membrane-IEA;membrane-IEA;integral component of membrane-IEA;endoplasmic reticulum-IEA \\ GO:0005789;GO:0016021 \\ endoplasmic reticulum membrane;integral component of membrane		Reticulon
TRINITY_DN17377_c1_g1	FvH4_3g12280.1	6.2615	14.6307	8.36925	2.33662	0.0017978	0.210669	protein EXORDIUM-like 7 \\ 5.10E-06 \\ 60.67 % \\ GO:0000166-IEA;GO:0016020-IEA;GO:0016021-IEA;GO:0016310-IEA;GO:0016740-IEA;GO:0004672-IEA;GO:0016301-IEA;GO:0030246-IEA;GO:0004674-IEA;GO:0005524-IEA;GO:0006468-IEA \\ nucleotide binding-IEA;membrane-IEA;integral component of membrane-IEA;phosphorylation-IEA;transferase activity-IEA;protein kinase activity-IEA;kinase activity-IEA;carbohydrate bind…		Protein EXORDIUM-like
TRINITY_DN11074_c0_g1	FvH4_6g45640.1	4.14225	9.678	5.53575	2.33641	0.00751778	0.493637	protein trichome birefringence-like 19		PMR5 N-terminal domain
TRINITY_DN18320_c0_g1	FvH4_1g22110.1	6.725	15.7038	8.97875	2.33513	0.00695249	0.470286	---NA---	nuclear transcription Y subunit beta	Transcription factor, NFYB/HAP3, conserved site
TRINITY_DN7186_c0_g1	FvH4_1g01030.1	2.214	5.16975	2.95575	2.33503	0.00183433	0.213246	---NA---	acyl-lipid omega-6 desaturase (Delta-12 desaturase) [EC:1.14.19.23 1.14.19.45]	Fatty acid desaturase domain
TRINITY_DN9779_c0_g1	FvH4_6g05630.1	0.935	2.178	1.243	2.32941	0.00136545	0.179998	TNF receptor-associated factor		Zinc finger, RING-type
TRINITY_DN1954_c0_g1	FvH4_6g09620.1	3.36875	7.84225	4.4735	2.32794	5.29349e-05	0.0288949	---NA---	mannan endo-1,4-beta-mannosidase [EC:3.2.1.78]	Glycoside hydrolase, family 5
TRINITY_DN23992_c0_g3	FvH4_2g25960.1	4.67175	10.8615	6.18975	2.32493	0.00199484	0.223612	probable pectinesterase/pectinesterase inhibitor 7 \\ 0.00E+00 \\ 89.28 % \\ GO:0004857-IEA;GO:0005618-IEA;GO:0043086-IEA;GO:0045330-IEA;GO:0030599-IEA;GO:0042545-IEA;GO:0045490-IEA;GO:0016787-IEA \\ enzyme inhibitor activity-IEA;cell wall-IEA;negative regulation of catalytic activity-IEA;aspartyl esterase activity-IEA;pectinesterase activity-IEA;cell wall modification-IEA;pectin catabolic proces…	pectinesterase [EC:3.1.1.11]	Pectinesterase, catalytic
TRINITY_DN8902_c0_g4	FvH4_3g26310.1	11.7027	27.1273	15.4245	2.31802	0.000259891	0.0695609	---NA---		The fantastic four family
TRINITY_DN3411_c0_g2	FvH4_6g09940.1	0.48375	1.11975	0.636	2.31473	0.0196682	0.874087	RING-H2 finger protein ATL74 \\ 0.00E+00 \\ 90.31 % \\ GO:0006081-IEA;GO:0016491-IEA;GO:0016020-IEA;GO:0016021-IEA;GO:0055114-IEA;GO:0005783-IEA;GO:0016620-IEA;GO:0004028-IBA \\ cellular aldehyde metabolic process-IEA;oxidoreductase activity-IEA;membrane-IEA;integral component of membrane-IEA;oxidation-reduction process-IEA;endoplasmic reticulum-IEA;oxidoreductase activity, acting on the aldehyde…		Zinc finger, RING-type
TRINITY_DN1723_c2_g3	FvH4_6g06000.1	0.60025	1.38925	0.789	2.31445	0.00039797	0.0901609	probable Xaa-Pro aminopeptidase P \\ 0.00E+00 \\ 91.85 % \\ GO:0009570-IEA;GO:0009507-IEA;GO:0046872-IEA;GO:0006508-IEA;GO:0070006-IEA;GO:0004177-IEA;GO:0016787-IEA \\ chloroplast stroma-IEA;chloroplast-IEA;metal ion binding-IEA;proteolysis-IEA;metalloaminopeptidase activity-IEA;aminopeptidase activity-IEA;hydrolase activity-IEA \\ GO:0006508;GO:0009570;GO:0046872;GO:0070006 \\ proteolysis;chloro…	Xaa-Pro aminopeptidase [EC:3.4.11.9]	Creatinase, N-terminal
TRINITY_DN4636_c1_g1	FvH4_3g15730.1	1.9435	4.4955	2.552	2.31309	0.0236861	0.929067	disease resistance protein RPP4-like \\ 6.50E-63 \\ 68.72 % \\ GO:0003677-IEA;GO:0000166-IEA;GO:0048544-IEA;GO:0016020-IEA;GO:0016021-IEA;GO:0016310-IEA;GO:0016740-IEA;GO:0016301-IEA;GO:0016787-IEA;GO:0007165-IEA;GO:0043531-IEA;GO:0004672-IEA;GO:0004674-IEA;GO:0005524-IEA;GO:0006468-IEA \\ DNA binding-IEA;nucleotide binding-IEA;recognition of pollen-IEA;membrane-IEA;integral component of membrane…
TRINITY_DN6503_c0_g1	FvH4_1g11530.1	2.76875	6.401	3.63225	2.31187	0.0188684	0.85425	histidine kinase 1 \\ 0.00E+00 \\ 86.46 % \\ GO:0000155-IEA;GO:0023014-IEA;GO:0005737-IEA;GO:0016020-IEA;GO:0006508-IEA;GO:0016021-IEA;GO:0000160-IEA;GO:0005839-IEA;GO:0019773-IEA;GO:0016772-IEA;GO:0016310-IEA;GO:0016740-IEA;GO:0051603-IEA;GO:0016301-IEA;GO:0018106-IEA;GO:0016787-IEA;GO:0008233-IEA;GO:0007165-IEA;GO:0004673-IEA;GO:0000502-IEA;GO:0004298-IEA;GO:0005622-IEA \\ phosphorelay sensor k…		Histidine kinase/HSP90-like ATPase
TRINITY_DN1432_c0_g3	FvH4_4g31050.1	0.4695	1.0845	0.615	2.3099	0.0153556	0.758109	N-terminal acetyltransferase A, auxiliary subunit \\ 0.00E+00 \\ 85.97 % \\ GO:0046872-IEA;GO:0016020-IEA;GO:0016021-IEA;GO:0016311-IEA;GO:0003993-IEA;GO:0016787-IEA \\ metal ion binding-IEA;membrane-IEA;integral component of membrane-IEA;dephosphorylation-IEA;acid phosphatase activity-IEA;hydrolase activity-IEA \\ GO:0003993;GO:0016021;GO:0016311;GO:0046872 \\ acid phosphatase activity;integral …		SET domain
TRINITY_DN1437_c0_g6	FvH4_2g02050.1	1.17225	2.70375	1.5315	2.30646	0.0038491	0.333351	TMV resistance protein N-like \\ 0.00E+00 \\ 74.14 % \\ GO:0007165-IEA;GO:0043531-IEA;GO:0016787-IEA \\ signal transduction-IEA;ADP binding-IEA;hydrolase activity-IEA		Toll/interleukin-1 receptor homology (TIR) domain
TRINITY_DN3608_c0_g1	FvH4_6g40610.1	0.73325	1.6855	0.95225	2.29867	0.025032	0.929067	myelin transcription factor 1-like protein \\ 1.80E-99 \\ 69.15 % \\ GO:0016616-IEA;GO:0016491-IEA;GO:0016020-IEA;GO:0016021-IEA;GO:0006102-IEA;GO:0004450-IEA;GO:0055114-IEA \\ oxidoreductase activity, acting on the CH-OH group of donors, NAD or NADP as acceptor-IEA;oxidoreductase activity-IEA;membrane-IEA;integral component of membrane-IEA;isocitrate metabolic process-IEA;isocitrate dehydrogenas…
TRINITY_DN19429_c0_g1	FvH4_4g28340.1	1.43625	3.30025	1.864	2.29782	0.0061709	0.437732	nudix hydrolase 1 \\ 2.80E-14 \\ 71.23 %	8-oxo-dGTP diphosphatase [EC:3.6.1.55]	NUDIX hydrolase domain
TRINITY_DN20079_c0_g1	FvH4_6g39710.1	0.46775	1.07225	0.6045	2.29236	0.0372241	0.929067	UDP-glycosyltransferase 82A1 \\ 0.00E+00 \\ 82.74 % \\ GO:0008171-IEA;GO:0046983-IEA;GO:0016740-IEA;GO:0008168-IEA;GO:0032259-IEA \\ O-methyltransferase activity-IEA;protein dimerization activity-IEA;transferase activity-IEA;methyltransferase activity-IEA;methylation-IEA \\ GO:0008171;GO:0032259;GO:0046983 \\ O-methyltransferase activity;methylation;protein dimerization activity		UDP-glucuronosyl/UDP-glucosyltransferase
TRINITY_DN1024_c0_g2	FvH4_6g21660.1	374.48	856.11	481.63	2.28613	0.000626388	0.114426	---NA---
TRINITY_DN1254_c0_g1	FvH4_5g08520.1	28.486	65.0662	36.5802	2.28415	0.0300708	0.929067	MADS-box transcription factor 23-like isoform X2 \\ 1.10E-54 \\ 85.47 % \\ GO:0003677-IEA;GO:0003700-IEA;GO:0006351-IEA;GO:0046983-IEA;GO:0006355-IEA;GO:0000977-IEA;GO:0005634-IEA;GO:0045944-IEA \\ DNA binding-IEA;DNA-binding transcription factor activity-IEA;transcription, DNA-templated-IEA;protein dimerization activity-IEA;regulation of transcription, DNA-templated-IEA;RNA polymerase II regulat…		Transcription factor, MADS-box
TRINITY_DN3017_c1_g1	FvH4_2g32340.1	0.8785	2.00125	1.12275	2.27803	0.00685773	0.466783	transcription factor MYB36-like \\ 0.00E+00 \\ 99.32 % \\ GO:0003677-IEA;GO:0006281-IEA;GO:0006260-IEA;GO:0046982-IEA;GO:0005524-IEA \\ DNA binding-IEA;DNA repair-IEA;DNA replication-IEA;protein heterodimerization activity-IEA;ATP binding-IEA \\ GO:0003677;GO:0005524;GO:0006260;GO:0006281;GO:0046982 \\ DNA binding;ATP binding;DNA replication;DNA repair;protein heterodimerization activity	transcription factor MYB, plant	SANT/Myb domain
TRINITY_DN747_c0_g1	FvH4_4g23440.1	1.395	3.17525	1.78025	2.27616	0.00161464	0.19901	ATP-dependent tryptophan/phenylalanine/tyrosine adenylase \\ 6.10E-85 \\ 64.93 %
TRINITY_DN9414_c0_g1	FvH4_2g32660.1	0.773	1.75825	0.98525	2.27458	0.0107313	0.608614	---NA---	RNA-binding protein Musashi
TRINITY_DN10316_c0_g1	FvH4_6g36430.1	0.64575	1.46875	0.823	2.27449	0.00332239	0.30539	myb family transcription factor PHL6 \\ 0.00E+00 \\ 82.53 % \\ GO:0003677-IEA;GO:0005634-IEA \\ DNA binding-IEA;nucleus-IEA \\ GO:0003677;GO:0005634 \\ DNA binding;nucleus		SANT/Myb domain
TRINITY_DN1424_c0_g1	FvH4_6g28850.1	3.81925	8.68475	4.8655	2.27394	0.00191878	0.218386	Mitochondrial glycoprotein \\ 4.50E-155 \\ 74.49 % \\ GO:0043531-IEA;GO:0016787-IEA \\ ADP binding-IEA;hydrolase activity-IEA	complement component 1 Q subcomponent-binding protein, mitochondrial	Mitochondrial glycoprotein
TRINITY_DN5848_c0_g3	FvH4_6g09980.1	104.573	237.734	133.16	2.27337	0.0351613	0.929067	non-specific lipid-transfer protein 1-like
TRINITY_DN535_c1_g1	FvH4_5g29630.1	7.66925	17.4047	9.7355	2.26942	0.00228516	0.244102	anaphase-promoting complex subunit 10 \\ 9.00E-106 \\ 92.09 % \\ GO:0010087-IEA;GO:0008283-IEA;GO:0016604-IEA;GO:0051301-IEA;GO:0005680-IEA;GO:0007049-IEA;GO:0031145-IEA;GO:0032875-IEA;GO:0032876-IEA \\ phloem or xylem histogenesis-IEA;cell proliferation-IEA;nuclear body-IEA;cell division-IEA;anaphase-promoting complex-IEA;cell cycle-IEA;anaphase-promoting complex-dependent catabolic process-IEA;…		ELO family
TRINITY_DN7833_c0_g1	FvH4_3g04980.1	5.22625	11.8565	6.63025	2.26864	0.00319539	0.299575	CSC1-like protein ERD4 \\ 0.00E+00 \\ 89.56 % \\ GO:0009507-IEA;GO:0016020-IEA;GO:0016021-IEA;GO:0034220-IEA;GO:0009941-IEA;GO:0005773-IEA;GO:0009506-IEA;GO:0005774-IEA;GO:0005227-IBA;GO:0005886-IEA;GO:0005886-IBA \\ chloroplast-IEA;membrane-IEA;integral component of membrane-IEA;ion transmembrane transport-IEA;chloroplast envelope-IEA;vacuole-IEA;plasmodesma-IEA;vacuolar membrane-IEA;calcium act…		Calcium-dependent channel, 7TM region, putative phosphate
TRINITY_DN142_c0_g1	FvH4_3g17650.1	19.1073	43.2283	24.121	2.2624	0.00100913	0.150572	---NA---	trehalose 6-phosphate synthase/phosphatase [EC:2.4.1.15 3.1.3.12]	Glycosyl transferase, family 20
TRINITY_DN7830_c0_g1	FvH4_5g26540.1	1.15475	2.611	1.45625	2.2611	0.000151477	0.0515437	---NA---
TRINITY_DN3630_c1_g1	FvH4_3g25540.1	18.4355	41.5662	23.1307	2.25469	0.00126192	0.17174	26S proteasome non-ATPase regulatory subunit 6 homolog \\ 0.00E+00 \\ 97.09 % \\ GO:0043161-IBA;GO:0050790-IEA;GO:0030234-IEA;GO:0000502-IEA \\ proteasome-mediated ubiquitin-dependent protein catabolic process-IBA;regulation of catalytic activity-IEA;enzyme regulator activity-IEA;proteasome complex-IEA \\ GO:0000502;GO:0030234;GO:0043161;GO:0050790 \\ proteasome complex;enzyme regulator activity;…	26S proteasome regulatory subunit N7	Proteasome component (PCI) domain
TRINITY_DN6797_c0_g1	FvH4_3g15570.1	4.16825	9.39675	5.2285	2.25436	0.0284483	0.929067	LOB domain-containing protein 4-like \\ 4.50E-55 \\ 77.48 %		Lateral organ boundaries, LOB
TRINITY_DN12819_c0_g1	FvH4_6g48670.1	0.50475	1.1365	0.63175	2.25161	0.00246721	0.255745	lysosomal Pro-X carboxypeptidase-like \\ 0.00E+00 \\ 91.05 % \\ GO:0004180-IEA;GO:0006508-IEA;GO:0006508-IBA;GO:0008236-IEA;GO:0016787-IEA;GO:0008239-IBA \\ carboxypeptidase activity-IEA;proteolysis-IEA;proteolysis-IBA;serine-type peptidase activity-IEA;hydrolase activity-IEA;dipeptidyl-peptidase activity-IBA \\ GO:0004180;GO:0006508;GO:0008236;GO:0008239 \\ carboxypeptidase activity;proteolysis;…	lysosomal Pro-X carboxypeptidase [EC:3.4.16.2]	Peptidase S28
TRINITY_DN2527_c0_g1	FvH4_3g12410.1	14.7225	33.1445	18.422	2.25128	0.00045178	0.096124	protein NAP1 isoform X1 \\ 0.00E+00 \\ 95.83 % \\ GO:0005789-IEA;GO:0045893-IEA;GO:0007015-IEA;GO:0010090-IEA;GO:0009825-IEA;GO:0005634-IEA \\ endoplasmic reticulum membrane-IEA;positive regulation of transcription, DNA-templated-IEA;actin filament organization-IEA;trichome morphogenesis-IEA;multidimensional cell growth-IEA;nucleus-IEA \\ GO:0005634;GO:0005789;GO:0007015;GO:0009825;GO:0010090;GO:…		Nck-associated protein 1
TRINITY_DN3542_c3_g1	FvH4_5g35540.1	54.007	121.406	67.3995	2.24798	0.00491603	0.387038	aspartyl protease AED3 \\ 1.40E-13 \\ 94.95 % \\ GO:0003824-IEA;GO:0046872-IEA;GO:0016020-IEA;GO:0016021-IEA;GO:0051539-IEA;GO:0006777-IEA;GO:0019008-IEA;GO:0051536-IEA \\ catalytic activity-IEA;metal ion binding-IEA;membrane-IEA;integral component of membrane-IEA;4 iron, 4 sulfur cluster binding-IEA;Mo-molybdopterin cofactor biosynthetic process-IEA;molybdopterin synthase complex-IEA;iron-sulfur…		Aspartic peptidase A1 family
TRINITY_DN15596_c0_g1	FvH4_4g34030.1	6.421	14.4322	8.01125	2.24766	0.0299325	0.929067	---NA---		Linker histone H1/H5, domain H15
TRINITY_DN19162_c0_g1	FvH4_5g08500.1	0.45	1.01075	0.56075	2.24611	0.0209447	0.910938	---NA---
TRINITY_DN708_c0_g1	FvH4_7g02750.1	3.664	8.21875	4.55475	2.24311	6.86491e-06	0.00939104	F-box protein SKIP5 \\ 1.50E-66 \\ 87.67 % \\ GO:0016829-IEA \\ lyase activity-IEA \\ GO:0016829 \\ lyase activity		F-box domain
TRINITY_DN4678_c1_g1	FvH4_2g29030.1	1.36875	3.069	1.70025	2.24219	0.00493991	0.388228	putative EEIG1/EHBP1 domain-containing protein \\ 0.00E+00 \\ 73.75 %		EEIG1/EHBP1 N-terminal domain
TRINITY_DN7992_c2_g1	FvH4_3g20860.1	12.4328	27.849	15.4163	2.23997	0.0235873	0.929067	Inactive serine/threonine-protein kinase \\ 5.60E-28 \\ 60.63 % \\ GO:0035235-IEA;GO:0016020-IEA;GO:0016021-IEA;GO:0004970-IEA;GO:0006811-IEA \\ ionotropic glutamate receptor signaling pathway-IEA;membrane-IEA;integral component of membrane-IEA;ionotropic glutamate receptor activity-IEA;ion transport-IEA \\ GO:0016020 \\ membrane
TRINITY_DN5260_c0_g2	FvH4_6g33430.1	0.48075	1.076	0.59525	2.23817	0.00612974	0.43651	---NA--- \\ 5.50E-166 \\ 75.17 % \\ GO:0052689-IEA;GO:0016020-IEA;GO:0016021-IEA;GO:0005576-IEA;GO:0005975-IEA;GO:0016787-IEA;GO:0030248-IEA \\ carboxylic ester hydrolase activity-IEA;membrane-IEA;integral component of membrane-IEA;extracellular region-IEA;carbohydrate metabolic process-IEA;hydrolase activity-IEA;cellulose binding-IEA \\ GO:0005576;GO:0005975;GO:0016021;GO:0030248;GO:0052689 \\ e…
TRINITY_DN7713_c0_g1	FvH4_3g37220.1	10.5548	23.6133	13.0585	2.23722	0.00268753	0.270482	universal stress protein PHOS34-like \\ 4.70E-07 \\ 97.64 %		Universal stress protein A
TRINITY_DN30655_c0_g1	FvH4_2g03830.1	6.90425	15.407	8.50275	2.23152	0.000112165	0.0441309	ABC transporter G family member 4 \\ 0.00E+00 \\ 89.08 % \\ GO:0000166-IEA;GO:0042626-IBA;GO:0055085-IBA;GO:0016020-IEA;GO:0016021-IEA;GO:0005524-IEA;GO:0016787-IEA;GO:0005886-IBA;GO:0016887-IEA \\ nucleotide binding-IEA;ATPase activity, coupled to transmembrane movement of substances-IBA;transmembrane transport-IBA;membrane-IEA;integral component of membrane-IEA;ATP binding-IEA;hydrolase activit…		ABC transporter-like
TRINITY_DN170558_c0_g1	FvH4_7g08000.1	0.7915	1.766	0.9745	2.23121	0.0322003	0.929067	E3 ubiquitin-protein ligase PUB23-like \\ 0.00E+00 \\ 87.48 % \\ GO:0016746-IEA;GO:0016740-IEA;GO:0016874-IEA;GO:0016567-IEA;GO:0004842-IEA \\ transferase activity, transferring acyl groups-IEA;transferase activity-IEA;ligase activity-IEA;protein ubiquitination-IEA;ubiquitin-protein transferase activity-IEA \\ GO:0004842;GO:0016567;GO:0016746;GO:0016874 \\ ubiquitin-protein transferase activity;p…		U box domain
TRINITY_DN2877_c0_g1	FvH4_3g08900.1	2.11825	4.726	2.60775	2.23109	0.00423039	0.351946	dof zinc finger protein DOF1.2-like \\ 4.60E-82 \\ 83.71 % \\ GO:0003677-IEA;GO:0006355-IEA;GO:0005634-IEA \\ DNA binding-IEA;regulation of transcription, DNA-templated-IEA;nucleus-IEA \\ GO:0003677;GO:0005634;GO:0006355 \\ DNA binding;nucleus;regulation of transcription, DNA-templated		Zinc finger, Dof-type
TRINITY_DN1728_c2_g2	FvH4_6g11560.1	0.48075	1.07025	0.5895	2.22621	0.0406629	0.929067	---NA---		Yippee/Mis18/Cereblon
TRINITY_DN2049_c2_g1	FvH4_3g02240.1	1.35175	3.00675	1.655	2.22434	0.00255907	0.261397	---NA---
TRINITY_DN935_c0_g1	FvH4_4g31400.1	3.0425	6.75325	3.71075	2.21964	0.0075978	0.496743	---NA--- \\ 0.00E+00 \\ 86.41 % \\ GO:0004722-IEA;GO:0003824-IEA;GO:0046872-IEA;GO:0006470-IEA;GO:0043169-IEA;GO:0004721-IEA;GO:0016787-IEA \\ protein serine/threonine phosphatase activity-IEA;catalytic activity-IEA;metal ion binding-IEA;protein dephosphorylation-IEA;cation binding-IEA;phosphoprotein phosphatase activity-IEA;hydrolase activity-IEA \\ GO:0004722;GO:0006470;GO:0046872 \\ protein se…
TRINITY_DN171982_c0_g1	FvH4_5g05060.1	0.456	1.012	0.556	2.2193	0.0161832	0.781313	RING-H2 finger protein ATL46-like \\ 0.00E+00 \\ 91.04 %		Zinc finger, RING-type
TRINITY_DN564_c0_g1	FvH4_3g02590.1	0.73825	1.63675	0.8985	2.21707	0.0359353	0.929067	kinesin 1 \\ 3.90E-18 \\ 78.95 % \\ GO:0000166-IEA;GO:0003777-IEA;GO:0008017-IEA;GO:0005524-IEA;GO:0007018-IEA \\ nucleotide binding-IEA;microtubule motor activity-IEA;microtubule binding-IEA;ATP binding-IEA;microtubule-based movement-IEA
TRINITY_DN6715_c0_g1	FvH4_2g12580.1	0.8025	1.77875	0.97625	2.21651	0.0460158	0.929067	---NA--- \\ 0.00E+00 \\ 90.90 % \\ GO:0070273-IEA;GO:0000166-IEA;GO:0000144-IEA;GO:0005525-IEA;GO:0051301-IEA;GO:0005619-IEA;GO:0000281-IEA;GO:0010314-IEA;GO:0031107-IEA;GO:0031105-IEA;GO:0032160-IEA;GO:0005198-IEA;GO:0000921-IEA;GO:0001400-IEA \\ phosphatidylinositol-4-phosphate binding-IEA;nucleotide binding-IEA;cellular bud neck septin ring-IEA;GTP binding-IEA;cell division-IEA;ascospore wall-…		Multicopper oxidase, type 1
TRINITY_DN2544_c0_g1	FvH4_6g44580.1	3.9445	8.73875	4.79425	2.21543	0.00122224	0.168699	putative ankyrin repeat-containing domain, PGG domain-containing protein \\ 0.00E+00 \\ 67.99 % \\ GO:0016020-IEA;GO:0016021-IEA \\ membrane-IEA;integral component of membrane-IEA \\ GO:0016020 \\ membrane		Ankyrin repeat
TRINITY_DN7439_c0_g1	FvH4_5g29550.1	0.7675	1.698	0.9305	2.21238	0.00115734	0.163178	F-box protein At1g10780 \\ 0.00E+00 \\ 91.79 %		F-box domain
TRINITY_DN4454_c0_g1	FvH4_3g41930.1	30.2073	66.713	36.5057	2.20851	0.00021663	0.0629004	---NA---	raffinose synthase [EC:2.4.1.82]	Glycosyl hydrolases 36
TRINITY_DN2772_c0_g1	FvH4_5g04400.1	3.77175	8.309	4.53725	2.20296	0.00266622	0.269042	UDP-glycosyltransferase 76F1-like \\ 0.00E+00 \\ 78.51 % \\ GO:0016757-IEA;GO:0047807-IEA;GO:0016758-IEA;GO:0016740-IEA \\ transferase activity, transferring glycosyl groups-IEA;cytokinin 7-beta-glucosyltransferase activity-IEA;transferase activity, transferring hexosyl groups-IEA;transferase activity-IEA \\ GO:0047807 \\ cytokinin 7-beta-glucosyltransferase activity		UDP-glucuronosyl/UDP-glucosyltransferase
TRINITY_DN1236_c0_g1	FvH4_4g25240.1	1.11375	2.45075	1.337	2.20045	0.00680854	0.464976	D-cysteine desulfhydrase 2, mitochondrial \\ 0.00E+00 \\ 82.86 % \\ GO:0016020-IEA;GO:0016021-IEA;GO:0016829-IEA;GO:0019148-IEA \\ membrane-IEA;integral component of membrane-IEA;lyase activity-IEA;D-cysteine desulfhydrase activity-IEA \\ GO:0016020;GO:0019148 \\ membrane;D-cysteine desulfhydrase activity	D-cysteine desulfhydrase [EC:4.4.1.15]	Tryptophan synthase beta subunit-like PLP-dependent enzyme
TRINITY_DN23220_c0_g1	FvH4_4g20180.1	2.277	5.007	2.73	2.19895	0.00757569	0.496397	cell wall / vacuolar inhibitor of fructosidase 1 \\ 0.00E+00 \\ 83.04 % \\ GO:0008146-IEA;GO:0016740-IEA;GO:0016787-IEA \\ sulfotransferase activity-IEA;transferase activity-IEA;hydrolase activity-IEA \\ GO:0008146;GO:0016787 \\ sulfotransferase activity;hydrolase activity		Pectinesterase inhibitor domain
TRINITY_DN761_c1_g1	FvH4_3g06860.1	0.981	2.157	1.176	2.19878	0.00243836	0.254053	probable leucine-rich repeat receptor-like serine/threonine-protein kinase At3g14840 \\ 0.00E+00 \\ 85.94 % \\ GO:0016020-IEA;GO:0016021-IEA;GO:0004672-IEA;GO:0016740-IEA;GO:0005524-IEA;GO:0006468-IEA \\ membrane-IEA;integral component of membrane-IEA;protein kinase activity-IEA;transferase activity-IEA;ATP binding-IEA;protein phosphorylation-IEA \\ GO:0004672;GO:0005524;GO:0006468;GO:0016021 \\ …		Protein kinase domain
TRINITY_DN2377_c0_g1	FvH4_6g33160.1	2.60875	5.7255	3.11675	2.19473	0.00719986	0.480739	---NA---
TRINITY_DN17769_c0_g1	FvH4_2g37650.1	0.473	1.03575	0.56275	2.18975	0.0447289	0.929067	lysine histidine transporter-like 8 \\ 0.00E+00 \\ 90.68 % \\ GO:0016020-IEA;GO:0016021-IEA \\ membrane-IEA;integral component of membrane-IEA \\ GO:0016021 \\ integral component of membrane		Amino acid transporter, transmembrane domain
TRINITY_DN45_c0_g4	FvH4_6g51730.1	16.5422	36.174	19.6318	2.18676	0.000325715	0.0798725	putative transcription factor C2H2 family		Zinc finger, RING-type
TRINITY_DN2951_c1_g1	FvH4_5g14490.1	1.39675	3.052	1.65525	2.18507	0.00889802	0.54595	formin-like protein 20 \\ 0.00E+00 \\ 87.35 %		Tensin phosphatase, C2 domain
TRINITY_DN12056_c0_g2	FvH4_1g24050.1	1.4415	3.14475	1.70325	2.18158	0.000232271	0.0654673	---NA---	xylan alpha-glucuronosyltransferase [EC:2.4.1.-]	Glycosyl transferase, family 8
TRINITY_DN5096_c0_g3	FvH4_5g06390.1	3.301	7.201	3.9	2.18146	0.0402909	0.929067	PREDICTED: uncharacterized protein LOC101312836 \\ 3.70E-161 \\ 53.32 % \\ GO:0008233-IEA;GO:0006508-IEA;GO:0016020-IEA;GO:0016021-IEA;GO:0004252-IEA;GO:0004252-IBA;GO:0004175-IBA;GO:0016787-IEA \\ peptidase activity-IEA;proteolysis-IEA;membrane-IEA;integral component of membrane-IEA;serine-type endopeptidase activity-IEA;serine-type endopeptidase activity-IBA;endopeptidase activity-IBA;hydrolase…		Protein of unknown function DUF868, plant
TRINITY_DN9237_c0_g2	FvH4_2g23090.1	3.11075	6.77925	3.6685	2.1793	0.00108585	0.156316	---NA---		Protein kinase domain
TRINITY_DN198453_c0_g1	FvH4_4g21750.1	5.2645	11.417	6.1525	2.16868	0.015622	0.765008	hypothetical protein RchiOBHm_Chr4g0427981
TRINITY_DN3329_c0_g1	FvH4_4g36930.1	8.44925	18.3212	9.872	2.16839	0.00183232	0.213106	ENHANCER OF AG-4 protein 2 \\ 0.00E+00 \\ 78.83 %		PWWP domain
TRINITY_DN1798_c0_g1	FvH4_1g11290.1	1.9015	4.12225	2.22075	2.16789	0.0102112	0.59209	---NA---		Uncharacterised protein family UPF0434/Trm112
TRINITY_DN5840_c0_g1	FvH4_6g49590.1	6.236	13.5155	7.2795	2.16733	4.94708e-05	0.0275647	---NA---		Thaumatin
TRINITY_DN2367_c0_g2	FvH4_1g04700.1	1.338	2.89825	1.56025	2.16611	0.00716518	0.479653	probable chlorophyll(ide) b reductase NYC1, chloroplastic \\ 0.00E+00 \\ 85.96 % \\ GO:0015996-IEA;GO:0015996-IBA;GO:0016491-IEA;GO:0034256-IEA;GO:0034256-IBA;GO:0016020-IEA;GO:0016021-IEA;GO:0010304-IEA;GO:0010304-IBA;GO:0055114-IEA;GO:0009536-IEA \\ chlorophyll catabolic process-IEA;chlorophyll catabolic process-IBA;oxidoreductase activity-IEA;chlorophyll(ide) b reductase activity-IEA;chlorophy…	chlorophyll(ide) b reductase [EC:1.1.1.294]	Short-chain dehydrogenase/reductase SDR
TRINITY_DN1120_c0_g1	FvH4_3g34940.1	22.3345	48.3658	26.0313	2.16552	0.00739995	0.488787	probable aquaporin TIP1-2 \\ 0.00E+00 \\ 96.13 % \\ GO:0016491-IEA;GO:0046872-IEA;GO:0051287-IEA;GO:0004471-IEA;GO:0004470-IEA;GO:0055114-IEA \\ oxidoreductase activity-IEA;metal ion binding-IEA;NAD binding-IEA;malate dehydrogenase (decarboxylating) (NAD+) activity-IEA;malic enzyme activity-IEA;oxidation-reduction process-IEA \\ GO:0004471;GO:0046872;GO:0051287;GO:0055114 \\ malate dehydrogenase …		Major intrinsic protein
TRINITY_DN3127_c1_g1	FvH4_5g26900.1	2.69475	5.833	3.13825	2.16458	0.00194697	0.220192	UDP-galactose transporter 2-like \\ 0.00E+00 \\ 90.57 % \\ GO:0016020-IEA;GO:0016021-IEA;GO:0008643-IEA \\ membrane-IEA;integral component of membrane-IEA;carbohydrate transport-IEA \\ GO:0008643;GO:0016021 \\ carbohydrate transport;integral component of membrane		Sugar phosphate transporter domain
TRINITY_DN1030_c1_g1	FvH4_7g07440.1	6.4735	14.0073	7.53375	2.16378	0.000735038	0.124556	trafficking protein particle complex subunit 2 \\ 3.50E-42 \\ 96.31 % \\ GO:0005737-IEA;GO:0016020-IEA;GO:0016021-IEA;GO:0006888-IEA;GO:0005622-IEA \\ cytoplasm-IEA;membrane-IEA;integral component of membrane-IEA;ER to Golgi vesicle-mediated transport-IEA;intracellular-IEA \\ GO:0005737;GO:0006888;GO:0016021 \\ cytoplasm;ER to Golgi vesicle-mediated transport;integral component of membrane	trafficking protein particle complex subunit 2	Trafficking protein particle complex subunit 2
TRINITY_DN3114_c0_g1	FvH4_1g07790.1	0.7755	1.678	0.9025	2.16377	0.00811519	0.517315	Survival protein SurE-like phosphatase/nucleotidase \\ 0.00E+00 \\ 82.53 % \\ GO:0008253-IEA;GO:0008252-IEA;GO:0016311-IEA;GO:0016787-IEA \\ 5'-nucleotidase activity-IEA;nucleotidase activity-IEA;dephosphorylation-IEA;hydrolase activity-IEA \\ GO:0008253;GO:0016311 \\ 5'-nucleotidase activity;dephosphorylation	5'-nucleotidase [EC:3.1.3.5]	Survival protein SurE-like phosphatase/nucleotidase
TRINITY_DN1800_c1_g1	FvH4_5g04490.1	47.0658	101.77	54.704	2.16229	0.0491636	0.929067	endoglucanase 6 \\ 0.00E+00 \\ 93.08 % \\ GO:0008152-IEA;GO:0003824-IEA;GO:0000272-IEA;GO:0030245-IEA;GO:0030247-IEA;GO:0030246-IEA;GO:0004553-IEA;GO:0016787-IEA;GO:0016798-IEA;GO:0005975-IEA;GO:0008810-IEA \\ metabolic process-IEA;catalytic activity-IEA;polysaccharide catabolic process-IEA;cellulose catabolic process-IEA;polysaccharide binding-IEA;carbohydrate binding-IEA;hydrolase activity, hyd…		Glycoside hydrolase family 9
TRINITY_DN3086_c0_g1	FvH4_3g13760.1	4.28	9.25025	4.97025	2.16127	0.00200787	0.224308	expansin-A13 \\ 4.30E-81 \\ 95.67 % \\ GO:0005618-IEA;GO:0016020-IEA;GO:0071555-IEA;GO:0009664-IEA;GO:0005576-IEA \\ cell wall-IEA;membrane-IEA;cell wall organization-IEA;plant-type cell wall organization-IEA;extracellular region-IEA \\ GO:0005576;GO:0005618;GO:0009664;GO:0016020 \\ extracellular region;cell wall;plant-type cell wall organization;membrane		Expansin
TRINITY_DN975_c0_g1	FvH4_6g28320.1	1.691	3.6525	1.9615	2.15996	0.0136021	0.705778	leucine-rich repeat extensin-like protein 2 \\ 8.00E-135 \\ 85.84 % \\ GO:0016491-IEA;GO:0055114-IEA;GO:0003960-IEA \\ oxidoreductase activity-IEA;oxidation-reduction process-IEA;NADPH:quinone reductase activity-IEA \\ GO:0003960;GO:0055114 \\ NADPH:quinone reductase activity;oxidation-reduction process
TRINITY_DN7265_c0_g1	FvH4_7g31660.1	0.64525	1.39325	0.748	2.15924	0.012827	0.678784	O-acyltransferase WSD1-like isoform X1 \\ 6.00E-137 \\ 79.88 % \\ GO:0016746-IEA;GO:0016020-IEA;GO:0016021-IEA;GO:0045017-IEA;GO:0016740-IEA;GO:0004144-IEA \\ transferase activity, transferring acyl groups-IEA;membrane-IEA;integral component of membrane-IEA;glycerolipid biosynthetic process-IEA;transferase activity-IEA;diacylglycerol O-acyltransferase activity-IEA \\ GO:0016020;GO:0016746 \\ memb…		O-acyltransferase, WSD1, N-terminal
TRINITY_DN23249_c0_g1	FvH4_2g08230.1	0.9515	2.05075	1.09925	2.15528	0.00214577	0.233999	---NA---	NAD(P)H dehydrogenase (quinone) [EC:1.6.5.2]	NADPH-dependent FMN reductase-like
TRINITY_DN4721_c1_g1	FvH4_3g12900.1	4.3615	9.398	5.0365	2.15476	0.000424503	0.0927824	zinc transporter 5-like \\ 2.70E-121 \\ 78.87 % \\ GO:0055085-IEA;GO:0046873-IEA;GO:0016020-IEA;GO:0016021-IEA;GO:0030001-IEA;GO:0005385-IEA;GO:0071577-IEA;GO:0006811-IEA \\ transmembrane transport-IEA;metal ion transmembrane transporter activity-IEA;membrane-IEA;integral component of membrane-IEA;metal ion transport-IEA;zinc ion transmembrane transporter activity-IEA;zinc ion transmembrane trans…		Zinc/iron permease
TRINITY_DN14694_c0_g5	FvH4_7g18470.1	0.9925	2.1385	1.146	2.15466	0.00974616	0.576074	3-hydroxyisobutyryl-CoA hydrolase 1 \\ 0.00E+00 \\ 74.06 % \\ GO:0007165-IEA;GO:0043531-IEA;GO:0016787-IEA \\ signal transduction-IEA;ADP binding-IEA;hydrolase activity-IEA	3-hydroxyisobutyryl-CoA hydrolase [EC:3.1.2.4]	ClpP/crotonase-like domain superfamily
TRINITY_DN4924_c0_g2	FvH4_1g04850.1	4.681	10.0685	5.3875	2.15093	0.000729811	0.124148	putative kelch-type beta propeller \\ 1.10E-105 \\ 78.02 % \\ GO:0016020-IEA;GO:0016021-IEA \\ membrane-IEA;integral component of membrane-IEA \\ GO:0016021 \\ integral component of membrane
TRINITY_DN11774_c0_g3	FvH4_6g40900.1	1.96575	4.222	2.25625	2.14778	0.00273098	0.272982	zinc finger CCCH domain-containing protein 18 isoform X1 \\ 0.00E+00 \\ 90.85 % \\ GO:0003723-IEA;GO:0046872-IEA;GO:0003676-IEA \\ RNA binding-IEA;metal ion binding-IEA;nucleic acid binding-IEA \\ GO:0003723;GO:0046872 \\ RNA binding;metal ion binding		RNA recognition motif domain
TRINITY_DN138_c0_g1	FvH4_6g46340.1	1180.95	2534.31	1353.36	2.146	0.000264627	0.0701492	collagen alpha-2(IV) chain-like isoform X1 \\ 2.40E-137 \\ 81.50 %		Collagen triple helix repeat
TRINITY_DN4743_c0_g1	FvH4_4g14800.1	2.7705	5.944	3.1735	2.14546	0.049509	0.929067	PREDICTED: uncharacterized protein LOC101310110 \\ 4.00E-15 \\ 46.96 %
TRINITY_DN627_c2_g1	FvH4_1g06300.1	0.7515	1.612	0.8605	2.14504	0.0184181	0.842201	---NA---		IQ motif, EF-hand binding site
TRINITY_DN15805_c1_g1	FvH4_5g09210.1	0.481	1.0315	0.5505	2.14449	0.0228336	0.929067	serine carboxypeptidase-like 45 \\ 0.00E+00 \\ 90.29 % \\ GO:0016020-IEA;GO:0016021-IEA \\ membrane-IEA;integral component of membrane-IEA \\ GO:0016021 \\ integral component of membrane	serine carboxypeptidase-like clade II [EC:3.4.16.-]	Peptidase S10, serine carboxypeptidase
TRINITY_DN3850_c3_g1	FvH4_6g33470.1	1.806	3.8725	2.0665	2.14424	0.0278415	0.929067	hypothetical protein RchiOBHm_Chr1g0351211 \\ 0.00E+00 \\ 57.86 % \\ GO:0003677-IEA;GO:0006351-IEA;GO:0006355-IEA;GO:0005634-IEA \\ DNA binding-IEA;transcription, DNA-templated-IEA;regulation of transcription, DNA-templated-IEA;nucleus-IEA
TRINITY_DN15792_c1_g1	FvH4_3g45570.1	18.5635	39.8035	21.24	2.14418	0.00114643	0.16201	---NA---
TRINITY_DN1671_c0_g1	FvH4_2g40050.1	0.838	1.79425	0.95625	2.14111	0.00473138	0.377811	---NA--- \\ 2.10E-05 \\ 97.70 %
TRINITY_DN6127_c0_g1	FvH4_4g27260.1	1.63375	3.49375	1.86	2.13849	0.000642305	0.115988	caffeoylshikimate esterase-like \\ 1.10E-05 \\ 98.57 % \\ GO:0006418-IEA;GO:0000166-IEA;GO:0004832-IEA;GO:0006438-IEA;GO:0004812-IEA;GO:0106074-IEA;GO:0016020-IEA;GO:0002161-IEA;GO:0016021-IEA;GO:0016874-IEA;GO:0005524-IEA;GO:0006412-IEA \\ tRNA aminoacylation for protein translation-IEA;nucleotide binding-IEA;valine-tRNA ligase activity-IEA;valyl-tRNA aminoacylation-IEA;aminoacyl-tRNA ligase act…	acylglycerol lipase [EC:3.1.1.23]	Alpha/beta hydrolase fold-1
TRINITY_DN7404_c0_g1	FvH4_5g38100.1	10.5853	22.6352	12.05	2.13838	0.00100185	0.149752	---NA---
TRINITY_DN14027_c0_g1	FvH4_6g43790.1	1.3165	2.807	1.4905	2.13217	0.00626707	0.442414	---NA---		BTB/POZ domain
TRINITY_DN5383_c0_g1	FvH4_7g22750.1	23.1212	49.1398	26.0185	2.12531	0.00452148	0.366755	PREDICTED: uncharacterized protein LOC101305304		Protein of unknown function DUF674
TRINITY_DN2489_c0_g1	FvH4_2g13280.1	10.7135	22.751	12.0375	2.12358	5.49474e-05	0.0292866	polypyrimidine tract-binding protein homolog 3 \\ 0.00E+00 \\ 96.08 % \\ GO:0003723-IEA;GO:0030170-IEA;GO:0008483-IEA;GO:0006397-IEA;GO:0005634-IEA;GO:0003676-IEA \\ RNA binding-IEA;pyridoxal phosphate binding-IEA;transaminase activity-IEA;mRNA processing-IEA;nucleus-IEA;nucleic acid binding-IEA \\ GO:0003723;GO:0005634;GO:0006397;GO:0008483;GO:0030170 \\ RNA binding;nucleus;mRNA processing;trans…	polypyrimidine tract-binding protein 2	RNA recognition motif domain
TRINITY_DN96841_c0_g1	FvH4_1g30170.1	0.87175	1.851	0.97925	2.12332	3.65365e-05	0.0229243	---NA---		Pentatricopeptide repeat
TRINITY_DN5345_c0_g1	FvH4_3g03730.1	1.881	3.98875	2.10775	2.12055	0.00301449	0.28857	ATP binding protein, putative \\ 0.00E+00 \\ 72.12 %		PB1 domain
TRINITY_DN2002_c0_g2	FvH4_4g13300.1	2.0005	4.2355	2.235	2.11722	0.00496743	0.388628	DNA repair protein RAD50 \\ 0.00E+00 \\ 88.21 % \\ GO:0006281-IEA;GO:0005737-IEA;GO:0046872-IEA;GO:0030870-IEA;GO:0006312-IEA;GO:0000723-IEA;GO:0016233-IEA;GO:0005634-IEA;GO:0006302-IEA;GO:0005524-IEA;GO:0016887-IEA \\ DNA repair-IEA;cytoplasm-IEA;metal ion binding-IEA;Mre11 complex-IEA;mitotic recombination-IEA;telomere maintenance-IEA;telomere capping-IEA;nucleus-IEA;double-strand break repair-…	DNA repair protein RAD50 [EC:3.6.-.-]	RAD50, zinc hook
TRINITY_DN16121_c0_g1	FvH4_2g07760.1	0.915	1.93725	1.02225	2.11721	0.00990083	0.582427	PREDICTED: uncharacterized protein LOC105350018 \\ 1.50E-58 \\ 71.14 % \\ GO:0016020-IEA;GO:0016021-IEA \\ membrane-IEA;integral component of membrane-IEA \\ GO:0016021 \\ integral component of membrane		Protein of unknown function DUF4228, plant
TRINITY_DN20323_c0_g1	FvH4_7g33640.1	27.168	57.4205	30.2525	2.11353	0.000258424	0.0693943	(-)-germacrene D synthase-like \\ 0.00E+00 \\ 81.18 % \\ GO:0000287-IEA;GO:0046872-IEA;GO:0016829-IEA;GO:0010333-IEA \\ magnesium ion binding-IEA;metal ion binding-IEA;lyase activity-IEA;terpene synthase activity-IEA \\ GO:0000287;GO:0010333 \\ magnesium ion binding;terpene synthase activity	(-)-germacrene D synthase [EC:4.2.3.75]	Terpene synthase, N-terminal domain
TRINITY_DN78_c0_g1	FvH4_6g31020.1	2.88475	6.09675	3.212	2.11344	0.027043	0.929067	coatomer subunit beta'-1-like \\ 2.60E-07 \\ 89.61 % \\ GO:0003677-IEA;GO:0008270-IEA;GO:0005634-IEA;GO:0003676-IEA \\ DNA binding-IEA;zinc ion binding-IEA;nucleus-IEA;nucleic acid binding-IEA	coatomer subunit beta'	WD40 repeat
TRINITY_DN5176_c0_g1	FvH4_5g09150.1	0.48075	1.01575	0.535	2.11284	0.00180301	0.211119	---NA---		Poly A polymerase, head domain
TRINITY_DN1345_c1_g1	FvH4_7g30620.1	10.0553	21.2052	11.15	2.10887	0.0194768	0.869848	nuclear valosin-containing protein-like \\ 0.00E+00 \\ 89.65 % \\ GO:0051013-IEA;GO:0005524-IEA;GO:0016787-IEA;GO:0008568-IEA \\ microtubule severing-IEA;ATP binding-IEA;hydrolase activity-IEA;microtubule-severing ATPase activity-IEA \\ GO:0005524;GO:0008568;GO:0051013 \\ ATP binding;microtubule-severing ATPase activity;microtubule severing		AAA+ ATPase domain
TRINITY_DN1010_c1_g2	FvH4_4g24500.1	5.85	12.3018	6.45175	2.10286	0.0193917	0.867809	putative cytochrome P450 \\ 0.00E+00 \\ 82.75 % \\ GO:0005506-IEA;GO:0016491-IEA;GO:0016705-IEA;GO:0046872-IEA;GO:0016020-IEA;GO:0016021-IEA;GO:0020037-IEA;GO:0055114-IEA;GO:0004497-IEA \\ iron ion binding-IEA;oxidoreductase activity-IEA;oxidoreductase activity, acting on paired donors, with incorporation or reduction of molecular oxygen-IEA;metal ion binding-IEA;membrane-IEA;integral component o…		Cytochrome P450
TRINITY_DN1013_c0_g2	FvH4_7g00100.1	2.7905	5.848	3.0575	2.09568	0.000873028	0.138067	ecotropic viral integration site protein \\ 1.00E-20 \\ 64.15 % \\ GO:0003723-IEA;GO:0009409-IEA;GO:0003735-IEA;GO:0009507-IEA;GO:0046686-IEA;GO:0016020-IEA;GO:0032544-IEA;GO:0015935-IEA;GO:1990904-IEA;GO:0009570-IEA;GO:0009579-IEA;GO:0009535-IEA;GO:0009534-IEA;GO:1901259-IEA;GO:0005840-IEA;GO:0006412-IEA;GO:0009955-IEA;GO:0005634-IEA \\ RNA binding-IEA;response to cold-IEA;structural constituent…
TRINITY_DN4055_c0_g1	FvH4_1g19550.1	0.7255	1.519	0.7935	2.09373	0.0192756	0.865003	putative U-box domain-containing protein 50 isoform X2 \\ 0.00E+00 \\ 84.86 % \\ GO:0016310-IEA;GO:0004672-IEA;GO:0016740-IEA;GO:0016301-IEA;GO:0005524-IEA;GO:0004842-IEA;GO:0016567-IEA;GO:0006468-IEA \\ phosphorylation-IEA;protein kinase activity-IEA;transferase activity-IEA;kinase activity-IEA;ATP binding-IEA;ubiquitin-protein transferase activity-IEA;protein ubiquitination-IEA;protein phosphor…		Protein kinase domain
TRINITY_DN3883_c4_g1	FvH4_7g04180.1	135.81	284.196	148.386	2.09259	0.00293885	0.284507	cysteine inhibitor 1 \\ 4.40E-169 \\ 91.78 % \\ GO:0005525-IEA;GO:0000166-IEA;GO:0005737-IEA;GO:0003746-IEA;GO:0003924-IEA;GO:0006414-IEA;GO:0006412-IEA \\ GTP binding-IEA;nucleotide binding-IEA;cytoplasm-IEA;translation elongation factor activity-IEA;GTPase activity-IEA;translational elongation-IEA;translation-IEA \\ GO:0003746;GO:0003924;GO:0005525;GO:0005737;GO:0006414 \\ translation elongatio…
TRINITY_DN20143_c0_g1	FvH4_5g15340.1	1.5645	3.2705	1.706	2.09044	0.0183714	0.841299	probable WRKY transcription factor 61 \\ 0.00E+00 \\ 74.70 % \\ GO:0003677-IEA;GO:0003700-IEA;GO:0006355-IEA;GO:0043565-IEA;GO:0005634-IEA \\ DNA binding-IEA;DNA-binding transcription factor activity-IEA;regulation of transcription, DNA-templated-IEA;sequence-specific DNA binding-IEA;nucleus-IEA \\ GO:0003700;GO:0005634;GO:0006355;GO:0043565 \\ DNA-binding transcription factor activity;nucleus;re…		WRKY domain
TRINITY_DN2444_c0_g1	FvH4_7g28940.1	16.9517	35.3933	18.4415	2.08788	0.00150803	0.191342	---NA---	valyl-tRNA synthetase [EC:6.1.1.9]	Aminoacyl-tRNA synthetase, class I, conserved site
TRINITY_DN14485_c0_g1	FvH4_2g17030.1	0.74575	1.557	0.81125	2.08783	0.00371865	0.32674	---NA---		Expansin
TRINITY_DN8551_c0_g1	FvH4_4g09080.1	1.6765	3.5	1.8235	2.08768	0.000597386	0.112104	FGGY carbohydrate kinase domain-containing protein \\ 4.60E-110 \\ 88.93 % \\ GO:0016310-IEA;GO:0008741-IEA;GO:0016740-IEA;GO:0016773-IEA;GO:0016301-IEA;GO:0005975-IEA;GO:0046835-IEA \\ phosphorylation-IEA;ribulokinase activity-IEA;transferase activity-IEA;phosphotransferase activity, alcohol group as acceptor-IEA;kinase activity-IEA;carbohydrate metabolic process-IEA;carbohydrate phosphorylation…		FGGY carbohydrate kinase, pentulose kinase
TRINITY_DN1452_c1_g1	FvH4_5g04670.1	24.8053	51.7758	26.9705	2.08729	2.08955e-05	0.0166286	nucleoside diphosphate kinase III, chloroplastic/mitochondrial-like \\ 6.60E-108 \\ 62.17 %	nucleoside-diphosphate kinase [EC:2.7.4.6]	Nucleoside diphosphate kinase
TRINITY_DN13042_c0_g1	FvH4_7g29540.1	1.9465	4.0625	2.116	2.08708	0.00271481	0.271955	O-glucosyltransferase rumi homolog \\ 0.00E+00 \\ 89.34 % \\ GO:0016757-IEA;GO:0016020-IEA;GO:0016021-IEA;GO:0016740-IEA \\ transferase activity, transferring glycosyl groups-IEA;membrane-IEA;integral component of membrane-IEA;transferase activity-IEA \\ GO:0016021;GO:0016757 \\ integral component of membrane;transferase activity, transferring glycosyl groups		Lipopolysaccharide-modifying protein
TRINITY_DN7285_c0_g2	FvH4_2g18000.1	0.539	1.12475	0.58575	2.08673	0.0337567	0.929067	cytochrome b561 and DOMON domain-containing protein At3g25290 \\ 0.00E+00 \\ 80.85 % \\ GO:0008152-IEA;GO:0016020-IEA;GO:0016021-IEA;GO:0004560-IEA;GO:0016787-IEA;GO:0016798-IEA;GO:0016788-IEA \\ metabolic process-IEA;membrane-IEA;integral component of membrane-IEA;alpha-L-fucosidase activity-IEA;hydrolase activity-IEA;hydrolase activity, acting on glycosyl bonds-IEA;hydrolase activity, acting on…		DOMON domain
TRINITY_DN584_c0_g2	FvH4_1g08040.1	1.25025	2.608	1.35775	2.08598	0.00737576	0.487995	---NA---		Pentatricopeptide repeat
TRINITY_DN1076_c0_g2	FvH4_3g07080.1	5.24875	10.9383	5.6895	2.08397	0.000608531	0.113321	aquaporin NIP1-1-like \\ 1.90E-132 \\ 89.19 % \\ GO:0055085-IEA;GO:0015267-IEA;GO:0016020-IEA;GO:0016021-IEA \\ transmembrane transport-IEA;channel activity-IEA;membrane-IEA;integral component of membrane-IEA \\ GO:0015267;GO:0016021;GO:0055085 \\ channel activity;integral component of membrane;transmembrane transport		Major intrinsic protein
TRINITY_DN14787_c0_g1	FvH4_7g16690.1	0.50575	1.05375	0.548	2.08354	0.0389303	0.929067	lysine-specific demethylase JMJ25-like isoform X1 \\ 1.20E-06 \\ 71.36 %
TRINITY_DN383_c0_g1	FvH4_6g53990.1	3.7615	7.8345	4.073	2.08281	0.00275341	0.2739	glycerophosphodiester phosphodiesterase GDPD1, chloroplastic-like \\ 0.00E+00 \\ 89.75 % \\ GO:0006629-IEA;GO:0008889-IEA;GO:0008081-IEA;GO:0016787-IEA \\ lipid metabolic process-IEA;glycerophosphodiester phosphodiesterase activity-IEA;phosphoric diester hydrolase activity-IEA;hydrolase activity-IEA \\ GO:0006629;GO:0008889 \\ lipid metabolic process;glycerophosphodiester phosphodiesterase activi…		PLC-like phosphodiesterase, TIM beta/alpha-barrel domain superfamily
TRINITY_DN4976_c1_g1	FvH4_1g13280.1	1.776	3.69125	1.91525	2.07841	0.00784809	0.506684	protein RADIALIS-like 3 \\ 4.90E-53 \\ 85.13 % \\ GO:0003677-IEA;GO:0005634-IEA \\ DNA binding-IEA;nucleus-IEA \\ GO:0003677;GO:0005634 \\ DNA binding;nucleus		SANT/Myb domain
TRINITY_DN4426_c0_g1	FvH4_7g00060.1	7.024	14.5608	7.53675	2.073	0.00411505	0.346089	protein YLS3-like \\ 2.40E-120 \\ 60.62 % \\ GO:0004190-IEA;GO:0008233-IEA;GO:0006508-IEA;GO:0016020-IEA;GO:0016021-IEA;GO:0016787-IEA \\ aspartic-type endopeptidase activity-IEA;peptidase activity-IEA;proteolysis-IEA;membrane-IEA;integral component of membrane-IEA;hydrolase activity-IEA \\ GO:0008233;GO:0016020 \\ peptidase activity;membrane		Plant lipid transfer protein/Par allergen
TRINITY_DN148_c0_g2	FvH4_3g46020.1	1.369	2.83375	1.46475	2.06994	0.015154	0.752739	---NA---
TRINITY_DN5039_c0_g1	FvH4_2g40540.1	0.64925	1.34	0.69075	2.06392	0.0081124	0.517315	---NA---		Protein kinase domain
TRINITY_DN7013_c0_g2	FvH4_1g16200.1	3.357	6.92025	3.56325	2.06144	0.00510406	0.394483	---NA---		Phosphatidylinositol-specific phospholipase C, X domain
TRINITY_DN11832_c0_g1	FvH4_7g14990.1	1.3605	2.80425	1.44375	2.06119	0.0156344	0.765173	---NA---		Protein of unknown function DUF604
TRINITY_DN168022_c0_g1	FvH4_5g22150.1	322.777	663.311	340.534	2.05501	0.000578794	0.110726	---NA---
TRINITY_DN7388_c0_g1	FvH4_7g31490.1	3.7995	7.808	4.0085	2.05501	0.000850289	0.136219	---NA---		IQ motif, EF-hand binding site
TRINITY_DN2695_c2_g1	FvH4_5g12140.1	19.3212	39.6653	20.344	2.05293	0.00593686	0.429033	---NA---
TRINITY_DN291350_c0_g1	FvH4_1g20130.1	14.4035	29.5217	15.1182	2.04962	0.000303701	0.0762213	---NA---		Protein MIZU-KUSSEI 1-like, plant
TRINITY_DN21500_c1_g1	FvH4_6g36210.1	4.60925	9.44475	4.8355	2.04909	0.000618512	0.114132	---NA---
TRINITY_DN3208_c0_g1	FvH4_3g31950.1	1.93225	3.95925	2.027	2.04904	0.00736035	0.487425	---NA---		Pleckstrin homology domain
TRINITY_DN1637_c0_g2	FvH4_7g18870.1	4.08675	8.36325	4.2765	2.04643	4.87816e-05	0.0273737	---NA---		Amino acid transporter, transmembrane domain
TRINITY_DN10987_c0_g1	FvH4_5g20840.1	34.0425	69.648	35.6055	2.04591	0.00176089	0.208485	Zf-FLZ domain containing protein \\ 1.50E-20 \\ 70.90 % \\ GO:0008270-IEA \\ zinc ion binding-IEA		Zf-FLZ domain
TRINITY_DN2734_c0_g1	FvH4_6g35330.1	6.52175	13.338	6.81625	2.04516	0.0242904	0.929067	dormancy-associated protein homolog 4-like isoform X1 \\ 2.90E-35 \\ 86.74 %		Dormancy/auxin associated protein
TRINITY_DN3510_c1_g1	FvH4_3g07740.1	9.08975	18.586	9.49625	2.04472	0.00574618	0.420981	phosphatidylinositol 4-phosphate 5-kinase MSS4-like protein		Protein of unknown function DUF4228, plant
TRINITY_DN6627_c0_g4	FvH4_1g07620.1	1.412	2.887	1.475	2.04462	0.0033006	0.304527	cytokinin dehydrogenase 3-like \\ 0.00E+00 \\ 85.90 % \\ GO:0009690-IEA;GO:0071949-IEA;GO:0003824-IEA;GO:0016491-IEA;GO:0050660-IEA;GO:0016020-IEA;GO:0016021-IEA;GO:0055114-IEA;GO:0019139-IEA \\ cytokinin metabolic process-IEA;FAD binding-IEA;catalytic activity-IEA;oxidoreductase activity-IEA;flavin adenine dinucleotide binding-IEA;membrane-IEA;integral component of membrane-IEA;oxidation-reducti…	cytokinin dehydrogenase [EC:1.5.99.12]	Oxygen oxidoreductase covalent FAD-binding site
TRINITY_DN5577_c0_g1	FvH4_6g11480.1	1.10825	2.2645	1.15625	2.04331	0.0249446	0.929067	protein N-methyltransferase NNT1 \\ 7.60E-08 \\ 72.00 % \\ GO:0046872-IEA;GO:0016020-IEA;GO:0016021-IEA;GO:0009579-IEA;GO:0009522-IEA;GO:0015979-IEA \\ metal ion binding-IEA;membrane-IEA;integral component of membrane-IEA;thylakoid-IEA;photosystem I-IEA;photosynthesis-IEA \\ GO:0009522;GO:0015979;GO:0016021;GO:0046872 \\ photosystem I;photosynthesis;integral component of membrane;metal ion binding		Lysine methyltransferase
TRINITY_DN23_c1_g4	FvH4_4g06500.1	1.58375	3.235	1.65125	2.04262	0.0460596	0.929067	serine carboxypeptidase-like 13 \\ 0.00E+00 \\ 79.92 % \\ GO:0004180-IEA;GO:0008233-IEA;GO:0004185-IEA;GO:0006508-IEA;GO:0016020-IEA;GO:0016021-IEA;GO:0016787-IEA \\ carboxypeptidase activity-IEA;peptidase activity-IEA;serine-type carboxypeptidase activity-IEA;proteolysis-IEA;membrane-IEA;integral component of membrane-IEA;hydrolase activity-IEA \\ GO:0004185;GO:0006508;GO:0016020 \\ serine-type …	serine carboxypeptidase-like clade I [EC:3.4.16.-]	Peptidase S10, serine carboxypeptidase
TRINITY_DN10754_c1_g1	FvH4_7g08920.1	18.7812	38.3498	19.5685	2.04192	0.000900525	0.140309	Zf-FLZ domain containing protein \\ 2.40E-39 \\ 55.50 %		Zf-FLZ domain
TRINITY_DN681_c1_g1	FvH4_7g01670.1	0.6015	1.227	0.6255	2.0399	0.00389368	0.335814	---NA---		Methyltransferase type 11
TRINITY_DN3335_c0_g1	FvH4_1g05660.1	0.521	1.062	0.541	2.03839	0.047606	0.929067	---NA---
TRINITY_DN8843_c0_g1	FvH4_7g17430.1	2.1425	4.3655	2.223	2.03757	0.0231265	0.929067	---NA---		Protein kinase domain
TRINITY_DN820_c0_g1	FvH4_5g03000.1	1.17225	2.38775	1.2155	2.03689	0.049169	0.929067	Polyketide cyclase SnoaL-like domain containing protein \\ 0.00E+00 \\ 72.25 % \\ GO:0016020-IEA;GO:0016021-IEA \\ membrane-IEA;integral component of membrane-IEA
TRINITY_DN6500_c0_g1	FvH4_1g21940.1	0.543	1.10575	0.56275	2.03637	0.0335153	0.929067	glutathione hydrolase 1-like isoform X1 \\ 0.00E+00 \\ 89.39 % \\ GO:0016746-IEA;GO:0036374-IEA;GO:0006508-IEA;GO:0006751-IEA;GO:0016740-IEA;GO:0016787-IEA \\ transferase activity, transferring acyl groups-IEA;glutathione hydrolase activity-IEA;proteolysis-IEA;glutathione catabolic process-IEA;transferase activity-IEA;hydrolase activity-IEA \\ GO:0006508;GO:0006751;GO:0016746;GO:0036374 \\ proteo…	gamma-glutamyltranspeptidase / glutathione hydrolase / leukotriene-C4 hydrolase [EC:2.3.2.2 3.4.19.13 3.4.19.14]	Gamma-glutamyltranspeptidase
TRINITY_DN6533_c0_g1	FvH4_3g27660.1	6.70775	13.6567	6.949	2.03597	8.70205e-05	0.0372857	---NA---		Stomatal closure-related actin-binding protein, coiled-coil domain
TRINITY_DN5259_c1_g2	FvH4_6g36780.1	0.686	1.39525	0.70925	2.03389	0.00881058	0.542313	tyrosine-sulfated glycopeptide receptor 1 \\ 0.00E+00 \\ 81.42 % \\ GO:0000166-IEA;GO:0016020-IEA;GO:0016021-IEA;GO:0016310-IEA;GO:0016740-IEA;GO:0004672-IEA;GO:0016301-IEA;GO:0004674-IEA;GO:0005524-IEA;GO:0006468-IEA \\ nucleotide binding-IEA;membrane-IEA;integral component of membrane-IEA;phosphorylation-IEA;transferase activity-IEA;protein kinase activity-IEA;kinase activity-IEA;protein serine…		Leucine-rich repeat
TRINITY_DN18042_c0_g2	FvH4_4g32180.1	11.5445	23.4605	11.916	2.03218	0.024626	0.929067	Mediator of RNA polymerase II transcription subunit 18, putative \\ 5.30E-126 \\ 76.93 % \\ GO:0016614-IEA;GO:0050660-IEA;GO:0055114-IEA \\ oxidoreductase activity, acting on CH-OH group of donors-IEA;flavin adenine dinucleotide binding-IEA;oxidation-reduction process-IEA \\ GO:0016614;GO:0050660;GO:0055114 \\ oxidoreductase activity, acting on CH-OH group of donors;flavin adenine dinucleotide bi…
TRINITY_DN771_c0_g1	FvH4_4g34840.1	1.57725	3.2045	1.62725	2.0317	0.00629838	0.444014	RING-H2 finger protein ATL47-like \\ 0.00E+00 \\ 78.74 % \\ GO:0016020-IEA;GO:0016021-IEA \\ membrane-IEA;integral component of membrane-IEA \\ GO:0016020 \\ membrane		Zinc finger, RING-type
TRINITY_DN353_c1_g2	FvH4_5g00870.1	4.02075	8.1625	4.14175	2.03009	0.00447024	0.364517	---NA---		ACT domain
TRINITY_DN1883_c1_g3	FvH4_3g26090.1	9.11625	18.4622	9.346	2.0252	0.00638211	0.44848	---NA---
TRINITY_DN9050_c0_g1	FvH4_2g03540.1	4.4005	8.91175	4.51125	2.02517	0.000222352	0.0640787	serine carboxypeptidase-like 18 \\ 0.00E+00 \\ 80.94 % \\ GO:0004180-IEA;GO:0004185-IEA;GO:0006508-IEA;GO:0016787-IEA \\ carboxypeptidase activity-IEA;serine-type carboxypeptidase activity-IEA;proteolysis-IEA;hydrolase activity-IEA \\ GO:0004185;GO:0006508 \\ serine-type carboxypeptidase activity;proteolysis	serine carboxypeptidase-like clade I [EC:3.4.16.-]	Peptidase S10, serine carboxypeptidase
TRINITY_DN480_c0_g1	FvH4_4g28890.1	0.88475	1.79075	0.906	2.02402	0.00318569	0.298847	---NA---
TRINITY_DN12368_c0_g1	FvH4_3g07710.1	7.3275	14.799	7.4715	2.01965	0.000403582	0.0908857	---NA---		Polyketide cyclase/dehydrase
TRINITY_DN4305_c0_g4	FvH4_6g32540.1	3.1215	6.29975	3.17825	2.01818	0.0154955	0.761844	FRIGIDA-like protein 4a \\ 0.00E+00 \\ 82.57 %
TRINITY_DN12249_c0_g1	FvH4_3g18840.1	0.5365	1.081	0.5445	2.01491	0.000588197	0.11157	---NA---		Mg2+ transporter protein, CorA-like/Zinc transport protein ZntB
TRINITY_DN2241_c4_g1	FvH4_3g28430.1	10.016	20.1518	10.1358	2.01196	0.000413428	0.0918131	---NA---		RNA recognition motif domain
TRINITY_DN1389_c0_g1	FvH4_3g40350.1	0.5115	1.029	0.5175	2.01173	0.00139501	0.182024	uncharacterized membrane protein At1g06890		Sugar phosphate transporter domain
TRINITY_DN6951_c0_g1	FvH4_2g13010.1	1.2955	2.60475	1.30925	2.01061	0.0106063	0.60453	tryptophan aminotransferase-related protein 4-like \\ 0.00E+00 \\ 86.51 % \\ GO:0016846-IEA;GO:0003824-IEA;GO:0047654-IEA;GO:0016020-IEA;GO:0016021-IEA;GO:0016829-IEA \\ carbon-sulfur lyase activity-IEA;catalytic activity-IEA;alliin lyase activity-IEA;membrane-IEA;integral component of membrane-IEA;lyase activity-IEA \\ GO:0016021;GO:0047654 \\ integral component of membrane;alliin lyase activity		Alliinase, EGF-like domain
TRINITY_DN883_c0_g1	FvH4_1g13420.1	0.6775	1.35725	0.67975	2.00332	0.0123078	0.663689	cytochrome P450 90B1 \\ 0.00E+00 \\ 94.52 % \\ GO:0005506-IEA;GO:0046872-IEA;GO:0016491-IEA;GO:0016705-IEA;GO:0008386-IEA;GO:0016020-IEA;GO:0016021-IEA;GO:0020037-IEA;GO:0055114-IEA;GO:0004497-IEA \\ iron ion binding-IEA;metal ion binding-IEA;oxidoreductase activity-IEA;oxidoreductase activity, acting on paired donors, with incorporation or reduction of molecular oxygen-IEA;cholesterol monooxygen…	steroid 22-alpha-hydroxylase [EC:1.14.13.-]	Cytochrome P450
TRINITY_DN144_c0_g2	FvH4_5g30810.1	1.24975	2.50275	1.253	2.0026	0.0318808	0.929067	---NA---
TRINITY_DN8645_c0_g1	FvH4_1g19820.1	0.93925	1.87925	0.94	2.0008	0.00235145	0.248249	IMPACT family member in pol 5region \\ 0.00E+00 \\ 75.02 % \\ GO:0051213-IEA;GO:0016491-IEA;GO:0046872-IEA;GO:0016707-IEA;GO:0055114-IEA \\ dioxygenase activity-IEA;oxidoreductase activity-IEA;metal ion binding-IEA;gibberellin 3-beta-dioxygenase activity-IEA;oxidation-reduction process-IEA \\ GO:0016707;GO:0046872;GO:0055114 \\ gibberellin 3-beta-dioxygenase activity;metal ion binding;oxidation-r…		Impact, N-terminal
Total distinct and upregulated genes=	762
Downregulated genes in NCGR1603
TRINITY_DN1900_c0_g1	FvH4_4g08830.1	36.553	0	-36.553	#DIV/0!	9.42974e-05	0.039257	polyadenylate-binding protein 7	polyadenylate-binding protein	RNA recognition motif domain
TRINITY_DN8754_c0_g1	FvH4_5g07050.1	23.1235	0	-23.1235	#DIV/0!	0.0001179	0.0451038	---NA--- \\ 6.00E-26 \\ 82.51 % \\ GO:0008152-IEA;GO:0016020-IEA;GO:0016021-IEA;GO:0004650-IEA;GO:0016787-IEA;GO:0016798-IEA \\ metabolic process-IEA;membrane-IEA;integral component of membrane-IEA;polygalacturonase activity-IEA;hydrolase activity-IEA;hydrolase activity, acting on glycosyl bonds-IEA \\ GO:0004650;GO:0008152;GO:0016021 \\ polygalacturonase activity;metabolic process;integral compo…
TRINITY_DN1308_c0_g2	FvH4_4g28030.1	15.7032	0	-15.7032	#DIV/0!	0.00104962	0.15325	AP2/ERF and B3 domain-containing transcription factor RAV1 \\ 1.00E-102 \\ 87.43 % \\ GO:0016874-IEA;GO:0009536-IEA \\ ligase activity-IEA;plastid-IEA \\ GO:0009536;GO:0016874 \\ plastid;ligase activity	RAV-like factor	AP2/ERF domain
TRINITY_DN2749_c0_g2	FvH4_7g01960.1	13.3722	0	-13.3722	#DIV/0!	0.000254815	0.0688603	---NA---
TRINITY_DN8425_c1_g1	FvH4_2g07240.1	12.2093	0	-12.2093	#DIV/0!	0.000109235	0.0434782	B3 domain-containing protein Os01g0723500-like \\ 0.00E+00 \\ 89.79 % \\ GO:0016020-IEA;GO:0004806-IEA;GO:0016021-IEA;GO:0016787-IEA;GO:0016788-IEA \\ membrane-IEA;triglyceride lipase activity-IEA;integral component of membrane-IEA;hydrolase activity-IEA;hydrolase activity, acting on ester bonds-IEA \\ GO:0004806;GO:0016021 \\ triglyceride lipase activity;integral component of membrane		B3 DNA binding domain
TRINITY_DN3254_c0_g1	FvH4_6g34840.1	11.4043	0	-11.4043	#DIV/0!	0.000453688	0.0964438	Glutamate--tRNA ligase
TRINITY_DN201_c0_g3	FvH4_3g40450.1	10.866	0	-10.866	#DIV/0!	0.000411857	0.0916768	pre-mRNA-splicing factor ATP-dependent RNA helicase DEAH1 \\ 0.00E+00 \\ 70.59 % \\ GO:0000166-IEA;GO:0004386-IEA;GO:0016787-IEA;GO:0005524-IEA;GO:0003676-IEA \\ nucleotide binding-IEA;helicase activity-IEA;hydrolase activity-IEA;ATP binding-IEA;nucleic acid binding-IEA \\ GO:0000166;GO:0016787 \\ nucleotide binding;hydrolase activity		Helicase, C-terminal
TRINITY_DN16205_c0_g1	FvH4_5g37080.1	5.00625	0	-5.00625	#DIV/0!	4.31657e-11	1.32981e-05	hypothetical protein RchiOBHm_Chr4g0428101 \\ 6.00E-26 \\ 53.08 %
TRINITY_DN3696_c0_g5	FvH4_5g07300.1	4.77725	0	-4.77725	#DIV/0!	0.000821633	0.132837	kelch domain-containing protein 4 \\ 0.00E+00 \\ 87.61 %		Kelch repeat type 2
TRINITY_DN35741_c0_g1	FvH4_7g12390.1	3.51025	0	-3.51025	#DIV/0!	5.69537e-06	0.00872922	putative helitron helicase-like domain-containing protein \\ 9.60E-124 \\ 69.30 %
TRINITY_DN201979_c0_g1	FvH4_2g22160.1	2.9305	0	-2.9305	#DIV/0!	0.00781557	0.505883	---NA---
TRINITY_DN463_c1_g2	FvH4_4g17590.1	2.3205	0	-2.3205	#DIV/0!	0.000988864	0.148593	---NA--- \\ 0.00E+00 \\ 85.30 % \\ GO:0003824-IEA;GO:0016310-IEA;GO:0016311-IEA;GO:0004331-IEA;GO:0016740-IEA;GO:0016301-IEA;GO:0016787-IEA;GO:0003873-IEA;GO:0046835-IEA \\ catalytic activity-IEA;phosphorylation-IEA;dephosphorylation-IEA;fructose-2,6-bisphosphate 2-phosphatase activity-IEA;transferase activity-IEA;kinase activity-IEA;hydrolase activity-IEA;6-phosphofructo-2-kinase activity-IEA;ca…
TRINITY_DN3265_c0_g2	FvH4_4g22250.1	2.28925	0	-2.28925	#DIV/0!	0.000189838	0.0582464	PREDICTED: uncharacterized protein LOC105350414 \\ 2.40E-35 \\ 60.94 % \\ GO:0047485-IEA;GO:0001764-IEA;GO:0045184-IEA;GO:0045184-IMP;GO:0051301-IEA;GO:0030425-IEA;GO:0030424-IEA;GO:2000370-IEA;GO:1901076-IEA;GO:0031252-IC;GO:0061098-IEA;GO:0008154-IEA;GO:0099140-IEA;GO:0043025-IEA;GO:0007049-IEA;GO:0043326-IEA;GO:0043326-IMP;GO:0098793-IEA;GO:0048858-IEA;GO:0031209-IEA;GO:0031209-IDA;GO:0005911-…
TRINITY_DN6263_c0_g1	FvH4_7g17710.1	1.9655	0	-1.9655	#DIV/0!	4.56823e-05	0.0261586	DNA damage-repair/toleration protein DRT102 \\ 2.60E-28 \\ 85.23 %		Sugar-phosphate isomerase, RpiB/LacA/LacB superfamily
TRINITY_DN4478_c0_g1	FvH4_1g19170.1	1.946	0	-1.946	#DIV/0!	7.62285e-06	0.00974922	putative ribonuclease T(2) \\ 0.00E+00 \\ 72.22 % \\ GO:0006508-IEA;GO:0043531-IEA;GO:0008234-IEA \\ proteolysis-IEA;ADP binding-IEA;cysteine-type peptidase activity-IEA	ribonuclease T2 [EC:3.1.27.1]	Ribonuclease T2-like
TRINITY_DN23806_c1_g1	FvH4_5g24830.1	1.59275	0	-1.59275	#DIV/0!	0.0484207	0.929067	putative Ulp1 protease family catalytic domain, transposase, Tnp1/En/Spm \\ 4.80E-129 \\ 61.44 % \\ GO:0008233-IEA;GO:0006508-IEA;GO:0008234-IEA;GO:0016787-IEA \\ peptidase activity-IEA;proteolysis-IEA;cysteine-type peptidase activity-IEA;hydrolase activity-IEA		Peptidase S10, serine carboxypeptidase
TRINITY_DN1669_c3_g1	FvH4_6g10000.1	1.48525	0	-1.48525	#DIV/0!	0.0330123	0.929067	F-box/LRR-repeat protein At3g59190-like isoform X1		F-box domain
TRINITY_DN3850_c0_g3	FvH4_5g31900.1	1.33425	0	-1.33425	#DIV/0!	0.000571323	0.110066	---NA--- \\ 9.50E-29 \\ 68.87 % \\ GO:0003677-IEA;GO:0007165-IEA;GO:0043531-IEA \\ DNA binding-IEA;signal transduction-IEA;ADP binding-IEA \\ GO:0003677;GO:0007165;GO:0043531 \\ DNA binding;signal transduction;ADP binding
TRINITY_DN30482_c0_g3	FvH4_1g29770.1	1.33325	0	-1.33325	#DIV/0!	8.58248e-05	0.0369791	---NA--- \\ 3.30E-61 \\ 67.92 % \\ GO:0003735-IEA;GO:0022625-IBA;GO:0005840-IEA;GO:0006412-IEA;GO:0005622-IEA \\ structural constituent of ribosome-IEA;cytosolic large ribosomal subunit-IBA;ribosome-IEA;translation-IEA;intracellular-IEA \\ GO:0022625 \\ cytosolic large ribosomal subunit
TRINITY_DN16322_c0_g2	FvH4_3g35370.1	1.1135	0	-1.1135	#DIV/0!	0.00702597	0.473631	exocyst complex component SEC15B
TRINITY_DN6103_c0_g1	FvH4_4g08110.1	1.109	0	-1.109	#DIV/0!	2.72379e-05	0.0194142	---NA---
TRINITY_DN27963_c0_g1	FvH4_5g16370.1	14.8558	7.42175	-7.434	-2.00165	0.0460852	0.929067	CDP-diacylglycerol-glycerol-3-phosphate 3-phosphatidyltransferase \\ 1.80E-111 \\ 87.48 % \\ GO:0009773-IBA;GO:0046872-IEA;GO:0009055-IEA;GO:0020037-IEA;GO:0022900-IEA \\ photosynthetic electron transport in photosystem I-IBA;metal ion binding-IEA;electron transfer activity-IEA;heme binding-IEA;electron transport chain-IEA \\ GO:0009055;GO:0009773;GO:0020037;GO:0046872 \\ electron transfer activi…
TRINITY_DN7589_c0_g2	FvH4_7g26950.1	6.186	3.08775	-3.09825	-2.0034	0.00445561	0.363903	ATP-dependent 6-phosphofructokinase 4, chloroplastic \\ 0.00E+00 \\ 91.44 % \\ GO:0000166-IEA;GO:0005737-IEA;GO:0009507-IEA;GO:0003824-IEA;GO:0046872-IEA;GO:0016310-IEA;GO:0016740-IEA;GO:0016301-IEA;GO:0008152-IEA;GO:0006096-IEA;GO:0061615-IEA;GO:0006002-IEA;GO:0003872-IEA;GO:0003872-IBA;GO:0005524-IEA \\ nucleotide binding-IEA;cytoplasm-IEA;chloroplast-IEA;catalytic activity-IEA;metal ion bindin…	6-phosphofructokinase 1 [EC:2.7.1.11]	Phosphofructokinase domain
TRINITY_DN6698_c0_g1	FvH4_7g28400.1	10.017	4.99825	-5.01875	-2.0041	3.16901e-05	0.0212697	---NA---		Embryo-specific ATS3
TRINITY_DN1184_c0_g1	FvH4_4g23680.1	11.621	5.7925	-5.8285	-2.00621	0.000922283	0.141922	probable methyltransferase At1g27930 \\ 3.70E-179 \\ 86.54 % \\ GO:0045492-IEA;GO:0016020-IEA;GO:0016021-IEA;GO:0008168-IEA;GO:0016740-IEA;GO:0030775-IEA;GO:0032259-IEA \\ xylan biosynthetic process-IEA;membrane-IEA;integral component of membrane-IEA;methyltransferase activity-IEA;transferase activity-IEA;glucuronoxylan 4-O-methyltransferase activity-IEA;methylation-IEA \\ GO:0016021;GO:0030775;G…		IRX15/IRX15L/IGXM
TRINITY_DN2385_c1_g2	FvH4_7g14340.1	6.0875	3.03075	-3.05675	-2.00858	0.00611326	0.436254	U-box domain-containing protein 33 \\ 0.00E+00 \\ 90.16 % \\ GO:0016310-IEA;GO:0004672-IEA;GO:0016301-IEA;GO:0016567-IEA;GO:0004842-IEA;GO:0005524-IEA;GO:0006468-IEA \\ phosphorylation-IEA;protein kinase activity-IEA;kinase activity-IEA;protein ubiquitination-IEA;ubiquitin-protein transferase activity-IEA;ATP binding-IEA;protein phosphorylation-IEA \\ GO:0004672;GO:0004842;GO:0005524;GO:0006468;G…		Protein kinase domain
TRINITY_DN2164_c2_g1	FvH4_7g19050.1	27.654	13.763	-13.891	-2.0093	0.00778514	0.504453	---NA---		GNAT domain
TRINITY_DN3179_c0_g1	FvH4_3g16430.1	10.8227	5.38625	-5.4365	-2.00933	0.0106862	0.607317	MLO-like protein 1 \\ 0.00E+00 \\ 84.41 % \\ GO:0009607-IEA;GO:0005516-IEA;GO:0016020-IEA;GO:0016021-IEA;GO:0006952-IEA \\ response to biotic stimulus-IEA;calmodulin binding-IEA;membrane-IEA;integral component of membrane-IEA;defense response-IEA \\ GO:0005516;GO:0006952;GO:0009607;GO:0016021 \\ calmodulin binding;defense response;response to biotic stimulus;integral component of membrane	mlo protein	Mlo-related protein
TRINITY_DN1781_c1_g1	FvH4_2g39690.1	2.08675	1.0365	-1.05025	-2.01327	0.0339513	0.929067	zinc-finger homeodomain protein 5 isoform X2 \\ 0.00E+00 \\ 67.09 % \\ GO:0003677-IEA;GO:0003700-IEA;GO:0042803-IEA;GO:0045893-IEA;GO:0043565-IEA;GO:0009737-IEA;GO:0005634-IEA \\ DNA binding-IEA;DNA-binding transcription factor activity-IEA;protein homodimerization activity-IEA;positive regulation of transcription, DNA-templated-IEA;sequence-specific DNA binding-IEA;response to abscisic acid-IEA;…		Homeodomain, ZF-HD class
TRINITY_DN2023_c1_g2	FvH4_2g03290.1	1.5075	0.7485	-0.759	-2.01403	0.0199204	0.881988	isoleucine--tRNA ligase, cytoplasmic \\ 0.00E+00 \\ 90.07 % \\ GO:0006629-IEA;GO:0016042-IEA;GO:0016787-IEA \\ lipid metabolic process-IEA;lipid catabolic process-IEA;hydrolase activity-IEA \\ GO:0016042;GO:0016787 \\ lipid catabolic process;hydrolase activity
TRINITY_DN5746_c0_g1	FvH4_4g25430.1	22.435	11.1348	-11.3002	-2.01486	0.00218572	0.237033	protein-tyrosine-phosphatase MKP1-like \\ 0.00E+00 \\ 80.70 % \\ GO:0004725-IEA;GO:0051015-IEA;GO:0006470-IEA;GO:0016791-IEA;GO:0008138-IEA;GO:0016311-IEA;GO:0035335-IEA;GO:0016787-IEA \\ protein tyrosine phosphatase activity-IEA;actin filament binding-IEA;protein dephosphorylation-IEA;phosphatase activity-IEA;protein tyrosine/serine/threonine phosphatase activity-IEA;dephosphorylation-IEA;peptid…		Dual specificity phosphatase, catalytic domain
TRINITY_DN2118_c0_g1	FvH4_1g13450.1	21.27	10.5527	-10.7172	-2.01559	5.62654e-06	0.00872922	---NA---	U1 small nuclear ribonucleoprotein 70kDa	RNA recognition motif domain
TRINITY_DN12531_c0_g1	FvH4_5g20910.1	31.967	15.8538	-16.1132	-2.01637	0.00229862	0.245199	lon protease homolog 2, peroxisomal \\ 0.00E+00 \\ 96.96 % \\ GO:0000166-IEA;GO:0006515-IEA;GO:0006625-IBA;GO:0006508-IEA;GO:0016485-IEA;GO:0016485-IBA;GO:0016787-IEA;GO:0016887-IEA;GO:0016558-IEA;GO:0008233-IEA;GO:0030163-IEA;GO:0005782-IEA;GO:0005782-IBA;GO:0004176-IEA;GO:0008236-IEA;GO:0004252-IEA;GO:0005777-IEA;GO:0005524-IEA \\ nucleotide binding-IEA;protein quality control for misfolded or …	ATP-dependent Lon protease [EC:3.4.21.53]	Lon, substrate-binding domain
TRINITY_DN130_c0_g3	FvH4_6g08600.1	15.6852	7.77425	-7.911	-2.01759	0.000816663	0.132555	hydrophobic protein LTI6A \\ 0.00E+00 \\ 89.34 % \\ GO:0008152-IEA;GO:0016020-IEA;GO:0016021-IEA;GO:0004560-IEA;GO:0016798-IEA;GO:0016787-IEA;GO:0016788-IEA \\ metabolic process-IEA;membrane-IEA;integral component of membrane-IEA;alpha-L-fucosidase activity-IEA;hydrolase activity, acting on glycosyl bonds-IEA;hydrolase activity-IEA;hydrolase activity, acting on ester bonds-IEA \\ GO:0004560;GO:00…		Proteolipid membrane potential modulator
TRINITY_DN3708_c0_g1	FvH4_5g14830.1	1.868	0.92425	-0.94375	-2.0211	0.00878425	0.541558	cyclic dof factor 3 \\ 0.00E+00 \\ 82.63 % \\ GO:0003677-IEA;GO:0006355-IEA;GO:0005634-IEA \\ DNA binding-IEA;regulation of transcription, DNA-templated-IEA;nucleus-IEA \\ GO:0003677;GO:0005634;GO:0006355 \\ DNA binding;nucleus;regulation of transcription, DNA-templated		Zinc finger, Dof-type
TRINITY_DN3480_c0_g1	FvH4_3g44550.1	6.9395	3.4335	-3.506	-2.02112	0.00222381	0.239877	metal tolerance protein 4-like \\ 0.00E+00 \\ 93.19 % \\ GO:0055085-IEA;GO:0006812-IEA;GO:0098655-IEA;GO:0016020-IEA;GO:0016021-IEA;GO:0008324-IEA \\ transmembrane transport-IEA;cation transport-IEA;cation transmembrane transport-IEA;membrane-IEA;integral component of membrane-IEA;cation transmembrane transporter activity-IEA \\ GO:0008324;GO:0016021;GO:0098655 \\ cation transmembrane transporter…		Cation efflux protein
TRINITY_DN284_c0_g1	FvH4_3g27670.1	12.112	5.98725	-6.12475	-2.02297	7.86044e-05	0.0355068	protein kinase 2B, chloroplastic-like isoform X3 \\ 0.00E+00 \\ 67.60 % \\ GO:0071949-IEA;GO:0016020-IEA;GO:0016021-IEA;GO:0016787-IEA;GO:0004104-IEA \\ FAD binding-IEA;membrane-IEA;integral component of membrane-IEA;hydrolase activity-IEA;cholinesterase activity-IEA \\ GO:0016021;GO:0016787;GO:0071949 \\ integral component of membrane;hydrolase activity;FAD binding		Protein kinase domain
TRINITY_DN21529_c0_g1	FvH4_3g03690.1	1.29425	0.63975	-0.6545	-2.02306	0.013167	0.691633	---NA---		Protein of unknown function DUF594
TRINITY_DN875_c0_g1	FvH4_1g22980.1	1.217	0.6015	-0.6155	-2.02328	0.0238406	0.929067	tRNA(His) guanylyltransferase 1-like isoform X1 \\ 0.00E+00 \\ 90.77 % \\ GO:0099116-IEA;GO:0000287-IEA;GO:0008193-IEA;GO:0006400-IEA \\ tRNA 5'-end processing-IEA;magnesium ion binding-IEA;tRNA guanylyltransferase activity-IEA;tRNA modification-IEA \\ GO:0000287;GO:0006400;GO:0008193;GO:0099116 \\ magnesium ion binding;tRNA modification;tRNA guanylyltransferase activity;tRNA 5'-end processing	tRNA(His) guanylyltransferase [EC:2.7.7.79]	Glycoside hydrolase family 17
TRINITY_DN1494_c0_g1	FvH4_3g06230.1	195.34	96.417	-98.9232	-2.02599	0.00701763	0.473172	DNA-binding protein DDB_G0278111 isoform X1 \\ 3.50E-26 \\ 54.65 %		PDCD5-like
TRINITY_DN295571_c0_g1	FvH4_2g24950.1	20.357	10.0403	-10.3168	-2.02754	0.0213974	0.922715	monothiol glutaredoxin-S6-like \\ 0.00E+00 \\ 70.26 % \\ GO:0008168-IEA;GO:0016740-IEA;GO:0032259-IEA \\ methyltransferase activity-IEA;transferase activity-IEA;methylation-IEA \\ GO:0016740 \\ transferase activity		Glutaredoxin
TRINITY_DN171811_c0_g1	FvH4_1g18020.1	36.0082	17.7383	-18.27	-2.02998	0.0101952	0.591477	VQ motif-containing protein 29-like \\ 1.10E-159 \\ 79.53 % \\ GO:0031429-IEA;GO:0001522-IEA;GO:0042254-IEA \\ box H/ACA snoRNP complex-IEA;pseudouridine synthesis-IEA;ribosome biogenesis-IEA \\ GO:0001522;GO:0031429;GO:0042254 \\ pseudouridine synthesis;box H/ACA snoRNP complex;ribosome biogenesis		VQ
TRINITY_DN370_c0_g1	FvH4_4g30100.1	2.20675	1.0865	-1.12025	-2.03106	0.000285446	0.0730353	---NA---		Ureide permease
TRINITY_DN199055_c0_g1	FvH4_3g45290.1	28.068	13.7907	-14.2772	-2.03528	0.0111996	0.625842	probable polyamine transporter At3g13620 \\ 0.00E+00 \\ 81.25 % \\ GO:0055085-IEA;GO:0016020-IEA;GO:0016021-IEA;GO:0022857-IEA \\ transmembrane transport-IEA;membrane-IEA;integral component of membrane-IEA;transmembrane transporter activity-IEA \\ GO:0016021;GO:0022857;GO:0055085 \\ integral component of membrane;transmembrane transporter activity;transmembrane transport		Amino acid/polyamine transporter I
TRINITY_DN493_c0_g1	FvH4_6g40820.1	1.5565	0.76475	-0.79175	-2.03531	0.00984527	0.58004	putative leucine-rich repeat-containing, plant-type, leucine-rich repeat domain, L \\ 0.00E+00 \\ 81.09 % \\ GO:0016020-IEA;GO:0016021-IEA \\ membrane-IEA;integral component of membrane-IEA \\ GO:0016021 \\ integral component of membrane		Leucine-rich repeat
TRINITY_DN2683_c0_g1	FvH4_2g21540.1	75.9153	37.2797	-38.6355	-2.03637	0.000402422	0.0908236	---NA---		Phosphate permease
TRINITY_DN3117_c0_g1	FvH4_6g05640.1	5.1775	2.54175	-2.63575	-2.03698	0.0108505	0.612698	---NA---	amidase [EC:3.5.1.4]	Amidase
TRINITY_DN4899_c0_g1	FvH4_7g07460.1	24.6872	12.1173	-12.57	-2.03736	0.00792846	0.509921	multiple organellar RNA editing factor 2, chloroplastic-like		Peptidase S8 propeptide/proteinase inhibitor I9 superfamily
TRINITY_DN3226_c0_g2	FvH4_1g15480.1	2.0355	0.999	-1.0365	-2.03754	0.0242402	0.929067	---NA---		Beta tubulin, autoregulation binding site
TRINITY_DN1945_c0_g1	FvH4_3g12160.1	462.516	226.773	-235.744	-2.03956	0.0042844	0.355002	protein PHLOEM PROTEIN 2-LIKE A9 \\ 1.00E-77 \\ 73.65 %		Phloem protein 2-like
TRINITY_DN3368_c0_g1	FvH4_2g39910.1	67.0275	32.82	-34.2075	-2.04228	1.99052e-05	0.016197	---NA---	glucose-6-phosphate isomerase [EC:5.3.1.9]	Phosphoglucose isomerase (PGI)
TRINITY_DN3069_c0_g1	FvH4_6g44410.1	13.4495	6.579	-6.8705	-2.04431	0.00032875	0.0800975	diacylglycerol kinase 5 isoform X1 \\ 0.00E+00 \\ 88.08 % \\ GO:0000166-IEA;GO:0007165-IEA;GO:0004143-IEA;GO:0016310-IEA;GO:0016740-IEA;GO:0016301-IEA;GO:0005524-IEA;GO:0007205-IEA;GO:0003951-IEA \\ nucleotide binding-IEA;signal transduction-IEA;diacylglycerol kinase activity-IEA;phosphorylation-IEA;transferase activity-IEA;kinase activity-IEA;ATP binding-IEA;protein kinase C-activating G protein…	diacylglycerol kinase (ATP) [EC:2.7.1.107]	Diacylglycerol kinase, accessory domain
TRINITY_DN14237_c1_g6	FvH4_5g12490.1	12.7892	6.249	-6.54025	-2.04661	0.000263031	0.0700362	GPI inositol-deacylase PGAP1-like protein \\ 0.00E+00 \\ 80.78 % \\ GO:0016020-IEA;GO:0016021-IEA;GO:0016788-IEA \\ membrane-IEA;integral component of membrane-IEA;hydrolase activity, acting on ester bonds-IEA \\ GO:0016021;GO:0016788 \\ integral component of membrane;hydrolase activity, acting on ester bonds		Uncharacterised conserved protein UCP015417, vWA
TRINITY_DN9082_c0_g1	FvH4_3g38750.1	43.523	21.2575	-22.2655	-2.04742	8.61953e-06	0.0103069	zinc finger CCCH domain-containing protein 66 \\ 0.00E+00 \\ 84.60 % \\ GO:0046872-IEA;GO:0016021-IEA \\ metal ion binding-IEA;integral component of membrane-IEA \\ GO:0016021;GO:0046872 \\ integral component of membrane;metal ion binding		Zinc finger, CCCH-type
TRINITY_DN995_c0_g1	FvH4_2g11020.1	8.58425	4.19125	-4.393	-2.04814	0.000277343	0.0717991	glutamyl-tRNA reductase 2, chloroplastic-like \\ 0.00E+00 \\ 89.40 % \\ GO:0006779-IEA;GO:0016491-IEA;GO:0050661-IEA;GO:0055114-IEA;GO:0006782-IEA;GO:0033014-IEA;GO:0008883-IEA \\ porphyrin-containing compound biosynthetic process-IEA;oxidoreductase activity-IEA;NADP binding-IEA;oxidation-reduction process-IEA;protoporphyrinogen IX biosynthetic process-IEA;tetrapyrrole biosynthetic process-IEA;gl…	glutamyl-tRNA reductase [EC:1.2.1.70]	Tetrapyrrole biosynthesis, glutamyl-tRNA reductase
TRINITY_DN2200_c0_g3	FvH4_2g34780.1	89.3525	43.6243	-45.7282	-2.04823	0.00464252	0.373017	patatin-like protein 2 \\ 0.00E+00 \\ 90.07 % \\ GO:0006629-IEA;GO:0016042-IEA;GO:0016787-IEA \\ lipid metabolic process-IEA;lipid catabolic process-IEA;hydrolase activity-IEA \\ GO:0016042;GO:0016787 \\ lipid catabolic process;hydrolase activity		Patatin-like phospholipase domain
TRINITY_DN7334_c0_g1	FvH4_5g23180.1	11.7447	5.7295	-6.01525	-2.04987	0.039002	0.929067	probable xyloglucan endotransglucosylase/hydrolase protein 30 \\ 1.20E-08 \\ 71.76 % \\ GO:0005739-IEA \\ mitochondrion-IEA	xyloglucan:xyloglucosyl transferase [EC:2.4.1.207]	Glycoside hydrolase family 16
TRINITY_DN3008_c1_g1	FvH4_1g12710.1	2.95075	1.439	-1.51175	-2.05056	0.00232833	0.246407	disease resistance RPP13-like protein 4 \\ 0.00E+00 \\ 87.10 % \\ GO:0043531-IEA;GO:0016787-IEA;GO:0005524-IEA \\ ADP binding-IEA;hydrolase activity-IEA;ATP binding-IEA \\ GO:0005524;GO:0016787;GO:0043531 \\ ATP binding;hydrolase activity;ADP binding		NB-ARC
TRINITY_DN265193_c0_g1	FvH4_6g45050.1	1.81275	0.8825	-0.93025	-2.05411	0.0409872	0.929067	photosystem II repair protein PSB27-H1, chloroplastic \\ 0.00E+00 \\ 91.44 % \\ GO:0099116-IEA;GO:0000166-IEA;GO:0016779-IEA;GO:0005525-IEA;GO:0000287-IEA;GO:0008193-IEA;GO:0046872-IEA;GO:0008033-IEA;GO:0006400-IEA;GO:0016740-IEA \\ tRNA 5'-end processing-IEA;nucleotide binding-IEA;nucleotidyltransferase activity-IEA;GTP binding-IEA;magnesium ion binding-IEA;tRNA guanylyltransferase activity-IEA;…	photosystem II Psb27 protein	Photosystem II Pbs27
TRINITY_DN1537_c1_g1	FvH4_3g02980.1	550.255	267.837	-282.418	-2.05444	0.0253516	0.929067	anthocyanidin reductase \\ 0.00E+00 \\ 93.59 % \\ GO:0033729-IEA;GO:0050662-IEA;GO:0003824-IEA;GO:0016491-IEA;GO:0055114-IEA \\ anthocyanidin reductase activity-IEA;coenzyme binding-IEA;catalytic activity-IEA;oxidoreductase activity-IEA;oxidation-reduction process-IEA \\ GO:0033729;GO:0050662;GO:0055114 \\ anthocyanidin reductase activity;coenzyme binding;oxidation-reduction process	anthocyanidin reductase [EC:1.3.1.77]	NAD-dependent epimerase/dehydratase
TRINITY_DN166196_c0_g3	FvH4_6g12360.1	1.0255	0.499	-0.5265	-2.05511	0.0189545	0.856278	fructose-1,6-bisphosphatase, chloroplastic \\ 0.00E+00 \\ 90.73 % \\ GO:0009409-IEA;GO:0009507-IEA;GO:0046872-IEA;GO:0019253-IEA;GO:0010319-IEA;GO:0005829-IBA;GO:0042132-IEA;GO:0042132-IBA;GO:0030388-IEA;GO:0030388-IBA;GO:0016787-IEA;GO:0006094-IBA;GO:0032440-IEA;GO:0042578-IEA;GO:0005986-IBA;GO:0005985-IEA;GO:0048046-IEA;GO:0005737-IBA;GO:0016491-IEA;GO:0016791-IEA;GO:0055114-IEA;GO:0016311-IEA;…
TRINITY_DN8338_c0_g1	FvH4_1g24040.1	3.0245	1.46975	-1.55475	-2.05783	0.0265922	0.929067	protein MKS1-like \\ 3.70E-126 \\ 63.14 %		VQ
TRINITY_DN11027_c0_g1	FvH4_7g19750.1	2.29675	1.116	-1.18075	-2.05802	0.0290756	0.929067	chlorophyll a-b binding protein 6, chloroplastic \\ 0.00E+00 \\ 86.35 % \\ GO:0003735-IEA;GO:0016020-IEA;GO:0016021-IEA;GO:0006298-IEA;GO:0015934-IEA;GO:0005840-IEA;GO:0030983-IEA;GO:0006412-IEA;GO:0005524-IEA \\ structural constituent of ribosome-IEA;membrane-IEA;integral component of membrane-IEA;mismatch repair-IEA;large ribosomal subunit-IEA;ribosome-IEA;mismatched DNA binding-IEA;translation…	light-harvesting complex I chlorophyll a/b binding protein 1	Chlorophyll A-B binding protein, plant
TRINITY_DN6395_c0_g1	FvH4_6g30880.1	109.769	53.3215	-56.4477	-2.05863	0.00512885	0.395406	extradiol ring-cleavage dioxygenase-like \\ 2.00E-93 \\ 95.61 % \\ GO:0009607-IEA;GO:0006952-IEA \\ response to biotic stimulus-IEA;defense response-IEA \\ GO:0006952;GO:0009607 \\ defense response;response to biotic stimulus	4,5-DOPA dioxygenase extradiol [EC:1.13.11.-]	Extradiol ring-cleavage dioxygenase, class III enzyme, subunit B
TRINITY_DN203800_c0_g1	FvH4_6g51980.1	3.55475	1.72575	-1.829	-2.05983	0.0450684	0.929067	PREDICTED: uncharacterized protein LOC101312562 \\ 2.50E-79 \\ 55.27 % \\ GO:0045087-N/A;GO:0016020-IEA;GO:0016021-IEA;GO:0030246-IEA \\ innate immune response-N/A;membrane-IEA;integral component of membrane-IEA;carbohydrate binding-IEA
TRINITY_DN146_c1_g1	FvH4_3g36640.1	1.72775	0.8385	-0.88925	-2.06052	0.0330205	0.929067	pentatricopeptide repeat-containing protein DOT4, chloroplastic \\ 0.00E+00 \\ 85.58 % \\ GO:0008270-IEA;GO:0009507-IBA;GO:0009451-IBA;GO:1900865-IBA \\ zinc ion binding-IEA;chloroplast-IBA;RNA modification-IBA;chloroplast RNA modification-IBA \\ GO:0008270;GO:0009507;GO:1900865 \\ zinc ion binding;chloroplast;chloroplast RNA modification		Pentatricopeptide repeat
TRINITY_DN7625_c0_g1	FvH4_2g15070.1	22.9447	11.1255	-11.8192	-2.06236	0.00841863	0.527569	NAD(P)H-quinone oxidoreductase subunit 3 like \\ 0.00E+00 \\ 82.64 % \\ GO:0016020-IEA;GO:0016021-IEA;GO:0005524-IEA \\ membrane-IEA;integral component of membrane-IEA;ATP binding-IEA \\ GO:0005524;GO:0016021 \\ ATP binding;integral component of membrane
TRINITY_DN2886_c0_g1	FvH4_7g11930.1	16.1517	7.83125	-8.3205	-2.06247	0.00229493	0.24489	---NA---	protein cornichon	Cornichon
TRINITY_DN18485_c0_g1	FvH4_6g47570.1	16.2688	7.86425	-8.4045	-2.0687	0.00527808	0.401342	UDP-glycosyltransferase 708C1 \\ 0.00E+00 \\ 78.49 % \\ GO:0016757-IEA;GO:0016758-IEA;GO:0016740-IEA \\ transferase activity, transferring glycosyl groups-IEA;transferase activity, transferring hexosyl groups-IEA;transferase activity-IEA \\ GO:0016758 \\ transferase activity, transferring hexosyl groups		UDP-glucuronosyl/UDP-glucosyltransferase
TRINITY_DN230645_c0_g1	FvH4_3g44810.1	26.4788	12.7982	-13.6805	-2.06894	0.0113375	0.630233	---NA---		Protein of unknown function DUF716 (TMEM45)
TRINITY_DN259937_c0_g1	FvH4_7g20000.1	103.489	49.9185	-53.5702	-2.07315	0.0182337	0.839024	hypothetical protein RchiOBHm_Chr1g0363951 \\ 0.00E+00 \\ 91.87 % \\ GO:0000166-IEA;GO:0016310-IEA;GO:0004672-IEA;GO:0016301-IEA;GO:0004674-IEA;GO:0005524-IEA;GO:0006468-IEA \\ nucleotide binding-IEA;phosphorylation-IEA;protein kinase activity-IEA;kinase activity-IEA;protein serine/threonine kinase activity-IEA;ATP binding-IEA;protein phosphorylation-IEA \\ GO:0004674;GO:0005524;GO:0006468 \\ pro…
TRINITY_DN1444_c0_g2	FvH4_1g16180.1	1.0405	0.50175	-0.53875	-2.07374	0.0256029	0.929067	subtilisin-like protease SBT1.9 \\ 0.00E+00 \\ 80.07 % \\ GO:0008233-IEA;GO:0006508-IEA;GO:0008236-IEA;GO:0004252-IEA;GO:0016787-IEA \\ peptidase activity-IEA;proteolysis-IEA;serine-type peptidase activity-IEA;serine-type endopeptidase activity-IEA;hydrolase activity-IEA \\ GO:0004252;GO:0006508 \\ serine-type endopeptidase activity;proteolysis		Peptidase S8/S53 domain
TRINITY_DN6389_c0_g2	FvH4_6g16560.1	2.28875	1.1035	-1.18525	-2.07408	0.0068227	0.465634	E3 ubiquitin-protein ligase RFWD3 isoform X1 \\ 0.00E+00 \\ 72.97 % \\ GO:0036297-IEA;GO:0016567-IEA;GO:0004842-IEA;GO:0005634-IEA \\ interstrand cross-link repair-IEA;protein ubiquitination-IEA;ubiquitin-protein transferase activity-IEA;nucleus-IEA \\ GO:0004842;GO:0005634;GO:0016567;GO:0036297 \\ ubiquitin-protein transferase activity;nucleus;protein ubiquitination;interstrand cross-link repair	E3 ubiquitin-protein ligase RFWD3 [EC:2.3.2.27]	Zinc finger, RING-type
TRINITY_DN3107_c0_g2	FvH4_1g08560.1	3.53875	1.70325	-1.8355	-2.07765	0.000130197	0.0476363	---NA---
TRINITY_DN3597_c0_g1	FvH4_3g38990.1	3.90875	1.88125	-2.0275	-2.07774	0.0160293	0.776276	probable protein phosphatase 2C 25 \\ 7.70E-122 \\ 74.39 % \\ GO:0004722-IEA;GO:0003824-IEA;GO:0046872-IEA;GO:0006470-IEA;GO:0043169-IEA;GO:0016787-IEA;GO:0004721-IEA \\ protein serine/threonine phosphatase activity-IEA;catalytic activity-IEA;metal ion binding-IEA;protein dephosphorylation-IEA;cation binding-IEA;hydrolase activity-IEA;phosphoprotein phosphatase activity-IEA \\ GO:0004722;GO:00064…		PPM-type phosphatase, divalent cation binding
TRINITY_DN1495_c0_g2	FvH4_6g40200.1	3.0575	1.4705	-1.587	-2.07922	0.00430036	0.35575	vacuolar cation/proton exchanger 3-like \\ 0.00E+00 \\ 84.30 % \\ GO:0015369-IEA;GO:0055085-IEA;GO:0006812-IEA;GO:0015297-IEA;GO:0016020-IEA;GO:0006816-IEA;GO:0016021-IEA;GO:0008324-IEA;GO:0005773-IEA;GO:0070588-IEA;GO:0006811-IEA;GO:0005774-IEA \\ calcium:proton antiporter activity-IEA;transmembrane transport-IEA;cation transport-IEA;antiporter activity-IEA;membrane-IEA;calcium ion transport-IEA…		Calcium/proton exchanger
TRINITY_DN1962_c0_g1	FvH4_2g16830.1	5.29025	2.54375	-2.7465	-2.07971	0.0397542	0.929067	homoserine kinase \\ 0.00E+00 \\ 91.31 % \\ GO:0016310-IEA;GO:0016740-IEA;GO:0016301-IEA;GO:0005524-IEA;GO:0004413-IEA;GO:0006566-IEA \\ phosphorylation-IEA;transferase activity-IEA;kinase activity-IEA;ATP binding-IEA;homoserine kinase activity-IEA;threonine metabolic process-IEA \\ GO:0004413;GO:0005524;GO:0006566;GO:0016310 \\ homoserine kinase activity;ATP binding;threonine metabolic process;p…	homoserine kinase [EC:2.7.1.39]	Homoserine kinase
TRINITY_DN5783_c0_g1	FvH4_5g04130.1	8.929	4.29275	-4.63625	-2.08002	0.000118005	0.0451038	---NA---		Amino acid transporter, transmembrane domain
TRINITY_DN7420_c0_g1	FvH4_3g13800.1	4.6375	2.22925	-2.40825	-2.0803	0.0199942	0.884367	---NA---	mediator of RNA polymerase II transcription subunit 22	Mediator of RNA polymerase II transcription subunit 22
TRINITY_DN3702_c0_g1	FvH4_5g08080.1	25.4752	12.2395	-13.2357	-2.0814	0.000407607	0.0912584	putative transcription factor C2H2 family \\ 0.00E+00 \\ 83.96 %		Zinc finger, RING-type
TRINITY_DN2980_c0_g1	FvH4_1g14640.1	4.281	2.0565	-2.2245	-2.08169	0.0215228	0.925795	B3 domain-containing transcription factor VRN1-like \\ 0.00E+00 \\ 54.97 % \\ GO:0003677-IEA;GO:0006351-IEA;GO:0006355-IEA;GO:0005634-IEA \\ DNA binding-IEA;transcription, DNA-templated-IEA;regulation of transcription, DNA-templated-IEA;nucleus-IEA \\ GO:0003677;GO:0005634;GO:0006355 \\ DNA binding;nucleus;regulation of transcription, DNA-templated		B3 DNA binding domain
TRINITY_DN15361_c0_g1	FvH4_6g06470.1	1.486	0.71375	-0.77225	-2.08196	0.0184151	0.842201	luminal-binding protein 5-like \\ 0.00E+00 \\ 93.97 % \\ GO:0000166-IEA;GO:0009860-IEA;GO:0016592-IEA;GO:0005524-IEA \\ nucleotide binding-IEA;pollen tube growth-IEA;mediator complex-IEA;ATP binding-IEA \\ GO:0005524;GO:0009860;GO:0016592 \\ ATP binding;pollen tube growth;mediator complex	heat shock 70kDa protein 5	Heat shock protein 70 family
TRINITY_DN8878_c2_g1	FvH4_2g26550.1	35.6007	17.0545	-18.5462	-2.08747	0.000116819	0.0449248	probable N-succinyldiaminopimelate aminotransferase DapC \\ 0.00E+00 \\ 90.98 % \\ GO:0030170-IEA;GO:0003824-IEA;GO:0009058-IEA;GO:0016020-IEA;GO:0016021-IEA;GO:0016740-IEA \\ pyridoxal phosphate binding-IEA;catalytic activity-IEA;biosynthetic process-IEA;membrane-IEA;integral component of membrane-IEA;transferase activity-IEA \\ GO:0009058;GO:0016021;GO:0016740;GO:0030170 \\ biosynthetic process…		Aminotransferase, class I/classII
TRINITY_DN63_c0_g1	FvH4_1g11200.1	19.8855	9.524	-10.3615	-2.08794	1.5247e-05	0.0140481	pre-rRNA-processing protein ESF1 \\ 0.00E+00 \\ 86.56 % \\ GO:0004190-IEA;GO:0008233-IEA;GO:0006508-IEA;GO:0005634-IEA;GO:0016787-IEA \\ aspartic-type endopeptidase activity-IEA;peptidase activity-IEA;proteolysis-IEA;nucleus-IEA;hydrolase activity-IEA \\ GO:0004190;GO:0005634;GO:0006508 \\ aspartic-type endopeptidase activity;nucleus;proteolysis		NUC153
TRINITY_DN5612_c0_g1	FvH4_5g25500.1	21.611	10.3458	-11.2652	-2.08888	0.000623047	0.114365	protein SLOW WALKER 1 \\ 0.00E+00 \\ 86.96 % \\ GO:0009553-IEA;GO:0009561-IEA;GO:0006364-IEA;GO:0005730-IEA \\ embryo sac development-IEA;megagametogenesis-IEA;rRNA processing-IEA;nucleolus-IEA \\ GO:0005730;GO:0006364;GO:0009561 \\ nucleolus;rRNA processing;megagametogenesis		WD40 repeat
TRINITY_DN1229_c0_g2	FvH4_5g17350.1	3.44775	1.6505	-1.79725	-2.08891	0.0121807	0.659376	2-phytyl-1,4-beta-naphthoquinone methyltransferase, chloroplastic \\ 7.10E-27 \\ 84.41 % \\ GO:0009507-IEA;GO:0042372-IEA;GO:0016740-IEA;GO:0008168-IEA;GO:0052624-IEA;GO:0032259-IEA;GO:0009536-IEA \\ chloroplast-IEA;phylloquinone biosynthetic process-IEA;transferase activity-IEA;methyltransferase activity-IEA;2-phytyl-1,4-naphthoquinone methyltransferase activity-IEA;methylation-IEA;plastid-IEA \…
TRINITY_DN2538_c1_g1	FvH4_3g00750.1	11.2877	5.4025	-5.88525	-2.08936	0.00137637	0.180895	inositol transporter 4-like \\ 0.00E+00 \\ 92.19 % \\ GO:0055085-IEA;GO:0016020-IEA;GO:0016021-IEA;GO:0008643-IEA;GO:0022857-IEA;GO:0005215-IEA \\ transmembrane transport-IEA;membrane-IEA;integral component of membrane-IEA;carbohydrate transport-IEA;transmembrane transporter activity-IEA;transporter activity-IEA \\ GO:0008643;GO:0016021;GO:0022857;GO:0055085 \\ carbohydrate transport;integral com…		Sugar/inositol transporter
TRINITY_DN3155_c0_g3	FvH4_7g15570.1	20.5882	9.84925	-10.739	-2.09034	0.00535309	0.404694	delta(8)-fatty-acid desaturase 1-like \\ 0.00E+00 \\ 88.28 % \\ GO:0016491-IEA;GO:0016020-IEA;GO:0006629-IEA;GO:0016021-IEA;GO:0102003-IEA;GO:0055114-IEA \\ oxidoreductase activity-IEA;membrane-IEA;lipid metabolic process-IEA;integral component of membrane-IEA;Delta8-sphingolipid desaturase activity-IEA;oxidation-reduction process-IEA \\ GO:0006629;GO:0016021;GO:0055114;GO:0102003 \\ lipid metabo…	sphingolipid 8-(E/Z)-desaturase [EC:1.14.19.29]	Cytochrome b5-like heme/steroid binding domain
TRINITY_DN10528_c0_g3	FvH4_5g23400.1	2.00475	0.9585	-1.04625	-2.09155	0.0134929	0.703104	---NA---		NB-ARC
TRINITY_DN9756_c0_g1	FvH4_6g34310.1	1.843	0.88075	-0.96225	-2.09253	0.0143774	0.728976	solute carrier family 25 member 44 \\ 0.00E+00 \\ 86.11 % \\ GO:0008618-IEA;GO:0008033-IEA;GO:0036265-IEA;GO:0006400-IEA;GO:0016740-IEA;GO:0008168-IEA;GO:0030488-IEA;GO:0005634-IEA;GO:0032259-IEA \\ 7-methylguanosine metabolic process-IEA;tRNA processing-IEA;RNA (guanine-N7)-methylation-IEA;tRNA modification-IEA;transferase activity-IEA;methyltransferase activity-IEA;tRNA methylation-IEA;nucleus-…		Mitochondrial carrier protein
TRINITY_DN12796_c0_g1	FvH4_4g36980.1	1.98375	0.948	-1.03575	-2.09256	0.0423888	0.929067	cytochrome P450 86B1-like \\ 0.00E+00 \\ 86.32 % \\ GO:0005506-IEA;GO:0016705-IEA;GO:0016491-IEA;GO:0046872-IEA;GO:0016020-IEA;GO:0016021-IEA;GO:0020037-IEA;GO:0018685-IEA;GO:0055114-IEA;GO:0004497-IEA;GO:0052869-IEA \\ iron ion binding-IEA;oxidoreductase activity, acting on paired donors, with incorporation or reduction of molecular oxygen-IEA;oxidoreductase activity-IEA;metal ion binding-IEA;me…	fatty acid omega-hydroxylase [EC:1.14.-.-]	Cytochrome P450
TRINITY_DN13892_c0_g1	FvH4_2g13070.1	6.94975	3.31825	-3.6315	-2.0944	0.00270803	0.271835	light-harvesting complex-like protein OHP2, chloroplastic \\ 4.40E-49 \\ 78.03 % \\ GO:0009507-IEA;GO:0009535-IEA;GO:0009534-IEA;GO:0009642-IEA \\ chloroplast-IEA;chloroplast thylakoid membrane-IEA;chloroplast thylakoid-IEA;response to light intensity-IEA \\ GO:0009535;GO:0009642 \\ chloroplast thylakoid membrane;response to light intensity		Chlorophyll a/b binding domain superfamily
TRINITY_DN10453_c1_g1	FvH4_2g38980.1	1.55	0.7395	-0.8105	-2.09601	0.00715188	0.478974	---NA---		Forkhead-associated (FHA) domain
TRINITY_DN55607_c0_g1	FvH4_5g20600.1	11.1405	5.31225	-5.82825	-2.09713	0.000861991	0.137166	PREDICTED: uncharacterized protein LOC101306432 isoform X2 \\ 0.00E+00 \\ 79.46 % \\ GO:0003677-IEA;GO:0000166-IEA;GO:0046872-IEA;GO:0016020-IEA;GO:0016021-IEA;GO:0006355-IEA;GO:0043565-IEA;GO:0005634-IEA;GO:0016787-IEA;GO:0005524-IEA \\ DNA binding-IEA;nucleotide binding-IEA;metal ion binding-IEA;membrane-IEA;integral component of membrane-IEA;regulation of transcription, DNA-templated-IEA;seque…
TRINITY_DN8257_c0_g1	FvH4_5g37740.1	8.56725	4.0815	-4.48575	-2.09904	0.0167461	0.796997	---NA---	mTERF domain-containing protein, mitochondrial	Transcription termination factor, mitochondrial/chloroplastic
TRINITY_DN6840_c0_g1	FvH4_7g18880.1	3.6555	1.74125	-1.91425	-2.09935	0.0296932	0.929067	thioredoxin-like 3-2, chloroplastic isoform X2 \\ 2.40E-13 \\ 85.64 % \\ GO:0009570-IEA;GO:0015035-IEA;GO:0045454-IEA;GO:0055114-IEA;GO:0006662-IEA;GO:0005623-IEA \\ chloroplast stroma-IEA;protein disulfide oxidoreductase activity-IEA;cell redox homeostasis-IEA;oxidation-reduction process-IEA;glycerol ether metabolic process-IEA;cell-IEA \\ GO:0006662;GO:0009570;GO:0015035;GO:0045454;GO:0055114 \…		Thioredoxin
TRINITY_DN14361_c0_g2	FvH4_7g12570.1	7.05275	3.3585	-3.69425	-2.09997	3.6073e-05	0.0227848	---NA---		D-isomer specific 2-hydroxyacid dehydrogenase, catalytic domain
TRINITY_DN1030_c0_g1	FvH4_7g03940.1	6.39525	3.043	-3.35225	-2.10163	0.00259683	0.264282	---NA---
TRINITY_DN20561_c0_g1	FvH4_4g20200.1	34.5425	16.426	-18.1165	-2.10292	0.000778261	0.129041	galactokinase \\ 0.00E+00 \\ 92.95 % \\ GO:0005737-IEA;GO:0005737-IBA;GO:0005829-IBA;GO:0006012-IEA;GO:0016310-IEA;GO:0033499-IBA;GO:0016773-IEA;GO:0016740-IEA;GO:0016301-IEA;GO:0005524-IEA;GO:0005534-IEA;GO:0004335-IEA;GO:0004335-IBA;GO:0046835-IEA \\ cytoplasm-IEA;cytoplasm-IBA;cytosol-IBA;galactose metabolic process-IEA;phosphorylation-IEA;galactose catabolic process via UDP-galactose-IBA;phos…	N-acetylgalactosamine kinase [EC:2.7.1.157]	Galactokinase
TRINITY_DN14342_c0_g1	FvH4_5g26600.1	40.28	19.135	-21.145	-2.10504	0.00240023	0.251424	Poly polymerase 1, putative \\ 9.90E-04 \\ 74.42 % \\ GO:0008152-IEA;GO:0016020-IEA;GO:0016798-IEA;GO:0016787-IEA \\ metabolic process-IEA;membrane-IEA;hydrolase activity, acting on glycosyl bonds-IEA;hydrolase activity-IEA		Protein of unknown function DUF4228, plant
TRINITY_DN292_c2_g1	FvH4_4g26860.1	5.9885	2.8445	-3.144	-2.10529	0.0011663	0.163766	---NA---
TRINITY_DN2154_c0_g1	FvH4_5g23300.1	64.2137	30.4962	-33.7175	-2.10563	0.00013653	0.0486561	phosphomevalonate kinase-like \\ 0.00E+00 \\ 91.25 % \\ GO:0010142-IBA;GO:0019287-IEA;GO:0019287-IBA;GO:0016310-IEA;GO:0016740-IEA;GO:0016301-IEA;GO:0004631-IEA;GO:0004631-IBA;GO:0005524-IEA;GO:0005777-IEA;GO:0005777-IBA \\ farnesyl diphosphate biosynthetic process, mevalonate pathway-IBA;isopentenyl diphosphate biosynthetic process, mevalonate pathway-IEA;isopentenyl diphosphate biosynthetic pro…	phosphomevalonate kinase [EC:2.7.4.2]	GHMP kinase N-terminal domain
TRINITY_DN2014_c0_g1	FvH4_6g13490.1	59.8212	28.3997	-31.4215	-2.1064	0.0015725	0.196527	HAD hydrolase, subfamily IA \\ 1.30E-165 \\ 91.41 % \\ GO:0033883-IEA;GO:0016311-IEA;GO:0016787-IEA \\ pyridoxal phosphatase activity-IEA;dephosphorylation-IEA;hydrolase activity-IEA \\ GO:0016311;GO:0033883 \\ dephosphorylation;pyridoxal phosphatase activity		HAD hydrolase, subfamily IA
TRINITY_DN1770_c0_g1	FvH4_1g14540.1	10.3648	4.91825	-5.4465	-2.10741	0.000586176	0.11154	---NA---		Protein kinase domain
TRINITY_DN330628_c0_g1	FvH4_3g38260.1	6.11225	2.89925	-3.213	-2.10822	0.0120001	0.654079	putative thylakoid soluble phosphoprotein TSP9 \\ 7.00E-159 \\ 92.93 % \\ GO:0003723-IEA;GO:0003735-IEA;GO:0019843-IEA;GO:0005840-IEA;GO:0006412-IEA;GO:0005622-IEA \\ RNA binding-IEA;structural constituent of ribosome-IEA;rRNA binding-IEA;ribosome-IEA;translation-IEA;intracellular-IEA \\ GO:0003735;GO:0005840;GO:0006412;GO:0019843 \\ structural constituent of ribosome;ribosome;translation;rRNA bi…		Thylakoid soluble phosphoprotein TSP9
TRINITY_DN1617_c0_g2	FvH4_3g43780.1	2.8585	1.35575	-1.50275	-2.10843	0.000597379	0.112104	---NA---		Protein kinase domain
TRINITY_DN3307_c0_g1	FvH4_5g11250.1	23.8923	11.331	-12.5613	-2.10857	0.00139019	0.181799	protein SAR DEFICIENT 1 \\ 0.00E+00 \\ 86.14 % \\ GO:0005516-IEA \\ calmodulin binding-IEA \\ GO:0005516 \\ calmodulin binding		Powdery mildew resistance protein, RPW8 domain
TRINITY_DN3724_c0_g1	FvH4_2g24960.1	134.22	63.6178	-70.6025	-2.10979	0.0264825	0.929067	monothiol glutaredoxin-S6-like \\ 4.30E-178 \\ 95.32 % \\ GO:0009507-IEA;GO:0018298-IEA;GO:0016020-IEA;GO:0016021-IEA;GO:0009579-IEA;GO:0009535-IEA;GO:0009523-IEA;GO:0009765-IEA;GO:0009522-IEA;GO:0016168-IEA;GO:0015979-IEA;GO:0009536-IEA \\ chloroplast-IEA;protein-chromophore linkage-IEA;membrane-IEA;integral component of membrane-IEA;thylakoid-IEA;chloroplast thylakoid membrane-IEA;photosystem I…		Glutaredoxin
TRINITY_DN833_c0_g1	FvH4_3g27720.1	2.5695	1.21775	-1.35175	-2.11004	0.000446741	0.0955537	---NA---		F-box domain
TRINITY_DN3736_c0_g1	FvH4_7g30150.1	9.2955	4.3985	-4.897	-2.11333	0.000264821	0.0701492	uncharacterized membrane protein YjcL-like \\ 0.00E+00 \\ 87.70 % \\ GO:0016020-IEA;GO:0016021-IEA;GO:0009941-IEA \\ membrane-IEA;integral component of membrane-IEA;chloroplast envelope-IEA \\ GO:0009941;GO:0016021 \\ chloroplast envelope;integral component of membrane		Protein of unknown function DUF819
TRINITY_DN692_c0_g1	FvH4_3g04660.1	128.498	60.8013	-67.6962	-2.1134	0.0158984	0.77265	---NA---	polyphenol oxidase [EC:1.10.3.1]	Tyrosinase copper-binding domain
TRINITY_DN322406_c0_g1	FvH4_3g25960.1	7.664	3.62625	-4.03775	-2.11348	0.00589036	0.4271	probable CCR4-associated factor 1 homolog 11 \\ 2.30E-88 \\ 63.88 %	CCR4-NOT transcription complex subunit 7/8	Ribonuclease CAF1
TRINITY_DN10121_c0_g1	FvH4_4g05510.1	9.6735	4.57525	-5.09825	-2.11431	0.0419764	0.929067	---NA---	hydroxyethylthiazole kinase [EC:2.7.1.50]	Hydroxyethylthiazole kinase
TRINITY_DN5350_c0_g1	FvH4_7g09500.1	2.52075	1.192	-1.32875	-2.11472	6.99574e-05	0.033195	---NA---		Alpha/Beta hydrolase fold
TRINITY_DN1222_c0_g1	FvH4_4g19740.1	478.66	225.755	-252.905	-2.12026	0.00691892	0.469392	ATP-citrate synthase beta chain protein 2 \\ 0.00E+00 \\ 98.38 % \\ GO:0016746-IEA;GO:0003878-IEA;GO:0003824-IEA;GO:0016740-IEA;GO:0046912-IEA \\ transferase activity, transferring acyl groups-IEA;ATP citrate synthase activity-IEA;catalytic activity-IEA;transferase activity-IEA;transferase activity, transferring acyl groups, acyl groups converted into alkyl on transfer-IEA \\ GO:0003878 \\ ATP ci…	ATP citrate (pro-S)-lyase [EC:2.3.3.8]	Citrate synthase
TRINITY_DN3534_c0_g1	FvH4_2g23800.1	48.4143	22.8268	-25.5875	-2.12094	0.00122379	0.168837	phenazine biosynthesis-like domain-containing protein 1 \\ 0.00E+00 \\ 86.58 % \\ GO:0009058-IEA;GO:0003824-IEA;GO:0102943-IEA;GO:0016853-IEA \\ biosynthetic process-IEA;catalytic activity-IEA;trans-2,3-dihydro-3-hydroxy-anthranilate isomerase activity-IEA;isomerase activity-IEA \\ GO:0009058;GO:0102943 \\ biosynthetic process;trans-2,3-dihydro-3-hydroxy-anthranilate isomerase activity		Phenazine biosynthesis PhzF protein
TRINITY_DN8089_c0_g1	FvH4_5g14510.1	2.35425	1.11	-1.24425	-2.12095	0.0366742	0.929067	probable receptor-like protein kinase At5g61350 \\ 0.00E+00 \\ 90.04 % \\ GO:0016020-IEA;GO:0016021-IEA;GO:0016310-IEA;GO:0004672-IEA;GO:0016301-IEA;GO:0005524-IEA;GO:0006468-IEA \\ membrane-IEA;integral component of membrane-IEA;phosphorylation-IEA;protein kinase activity-IEA;kinase activity-IEA;ATP binding-IEA;protein phosphorylation-IEA \\ GO:0004672;GO:0005524;GO:0006468;GO:0016021 \\ protein…		Tetratricopeptide-like helical domain superfamily
TRINITY_DN6831_c0_g1	FvH4_6g14490.1	89.7955	42.3362	-47.4593	-2.12101	0.00467618	0.374861	diaminopimelate epimerase, chloroplastic \\ 1.40E-117 \\ 83.85 % \\ GO:0008837-IEA;GO:0008837-IBA;GO:0005737-IEA;GO:0009089-IEA;GO:0009089-IBA;GO:0005829-IBA \\ diaminopimelate epimerase activity-IEA;diaminopimelate epimerase activity-IBA;cytoplasm-IEA;lysine biosynthetic process via diaminopimelate-IEA;lysine biosynthetic process via diaminopimelate-IBA;cytosol-IBA \\ GO:0005829;GO:0008837;GO:00…	diaminopimelate epimerase [EC:5.1.1.7]	Diaminopimelate epimerase, DapF
TRINITY_DN12621_c0_g1	FvH4_6g15760.1	3.70725	1.74775	-1.9595	-2.12116	0.000500584	0.101131	putative serine/threonine-protein kinase \\ 4.00E-59 \\ 89.41 % \\ GO:0016020-IEA;GO:0016021-IEA;GO:0005575-ND;GO:0003674-ND \\ membrane-IEA;integral component of membrane-IEA;cellular_component-ND;molecular_function-ND \\ GO:0016021 \\ integral component of membrane		Protein kinase domain
TRINITY_DN2413_c0_g1	FvH4_1g07140.1	13.0985	6.16825	-6.93025	-2.12354	0.0322162	0.929067	serine acetyltransferase 5 \\ 1.30E-25 \\ 65.33 % \\ GO:0005576-IEA;GO:0005975-IEA;GO:0030248-IEA \\ extracellular region-IEA;carbohydrate metabolic process-IEA;cellulose binding-IEA	serine O-acetyltransferase [EC:2.3.1.30]	Hexapeptide repeat
TRINITY_DN2657_c0_g1	FvH4_5g14350.1	1.0485	0.49375	-0.55475	-2.12354	0.00284988	0.279428	---NA---		Remorin, C-terminal
TRINITY_DN7290_c0_g1	FvH4_2g31410.1	9.52075	4.48275	-5.038	-2.12386	0.00196499	0.221174	protein PLASTID MOVEMENT IMPAIRED 1-RELATED 1 \\ 0.00E+00 \\ 72.95 %		EEIG1/EHBP1 N-terminal domain
TRINITY_DN534_c0_g1	FvH4_2g10220.1	19.404	9.1275	-10.2765	-2.12588	0.000153657	0.0519049	GATA transcription factor 5-like \\ 0.00E+00 \\ 62.77 % \\ GO:0003677-IEA;GO:0003700-IEA;GO:0008270-IEA;GO:0046872-IEA;GO:0045893-IEA;GO:0006355-IEA;GO:0043565-IEA;GO:0005634-IEA \\ DNA binding-IEA;DNA-binding transcription factor activity-IEA;zinc ion binding-IEA;metal ion binding-IEA;positive regulation of transcription, DNA-templated-IEA;regulation of transcription, DNA-templated-IEA;sequence-…		Zinc finger, GATA-type
TRINITY_DN62_c0_g1	FvH4_6g40460.1	14.006	6.585	-7.421	-2.12696	0.000142803	0.0494862	---NA---	heterogeneous nuclear ribonucleoprotein A1/A3	RNA recognition motif domain
TRINITY_DN4975_c0_g2	FvH4_2g05710.1	54.4878	25.6008	-28.887	-2.12837	0.00222614	0.240029	CBS domain-containing protein CBSX1, chloroplastic-like \\ 1.50E-04 \\ 65.85 %		CBS domain
TRINITY_DN952_c0_g1	FvH4_7g27630.1	12.125	5.69	-6.435	-2.13093	0.000370642	0.0861759	beta-fructofuranosidase, soluble isoenzyme I-like \\ 0.00E+00 \\ 88.61 % \\ GO:0008152-IEA;GO:0016020-IEA;GO:0016021-IEA;GO:0005773-IEA;GO:0005775-IEA;GO:0004553-IEA;GO:0004575-IEA;GO:0004564-IEA;GO:0016787-IEA;GO:0005975-IEA;GO:0016798-IEA \\ metabolic process-IEA;membrane-IEA;integral component of membrane-IEA;vacuole-IEA;vacuolar lumen-IEA;hydrolase activity, hydrolyzing O-glycosyl compounds-I…	beta-fructofuranosidase [EC:3.2.1.26]	Glycoside hydrolase, family 32
TRINITY_DN275_c2_g1	FvH4_2g18520.1	9.532	4.47275	-5.05925	-2.13113	5.24167e-05	0.0287546	ethylene-responsive transcription factor-like protein At4g13040 \\ 1.30E-126 \\ 78.39 % \\ GO:0003677-IEA;GO:0003700-IEA;GO:0006355-IEA;GO:0005634-IEA \\ DNA binding-IEA;DNA-binding transcription factor activity-IEA;regulation of transcription, DNA-templated-IEA;nucleus-IEA \\ GO:0003677;GO:0003700;GO:0005634;GO:0006355 \\ DNA binding;DNA-binding transcription factor activity;nucleus;regulation o…		AP2/ERF domain
TRINITY_DN11402_c0_g2	FvH4_3g33710.1	7.30475	3.42675	-3.878	-2.13168	0.00355699	0.317795	NEDD8-specific protease 1 \\ 3.90E-82 \\ 44.30 %	sentrin-specific protease 8 [EC:3.4.22.68]	Ulp1 protease family, C-terminal catalytic domain
TRINITY_DN4778_c0_g1	FvH4_6g30910.1	4.46825	2.095	-2.37325	-2.13282	0.00457637	0.369844	---NA---		BRCT domain
TRINITY_DN18093_c0_g2	FvH4_2g33990.1	7.5935	3.5555	-4.038	-2.13571	0.000109594	0.0435517	putative SPRY domain, concanavalin A-like lectin/glucanase domain-containing protein \\ 0.00E+00 \\ 77.06 % \\ GO:0016020-IEA;GO:0016021-IEA;GO:0030246-IEA \\ membrane-IEA;integral component of membrane-IEA;carbohydrate binding-IEA \\ GO:0016021;GO:0030246 \\ integral component of membrane;carbohydrate binding		Concanavalin A-like lectin/glucanase domain superfamily
TRINITY_DN27750_c0_g1	FvH4_7g28580.1	4.079	1.9095	-2.1695	-2.13616	0.00210689	0.231397	receptor-like serine/threonine-protein kinase At4g25390 \\ 0.00E+00 \\ 76.94 % \\ GO:0016020-IEA;GO:0016021-IEA;GO:0016310-IEA;GO:0004672-IEA;GO:0016740-IEA;GO:0016301-IEA;GO:0005524-IEA;GO:0006468-IEA \\ membrane-IEA;integral component of membrane-IEA;phosphorylation-IEA;protein kinase activity-IEA;transferase activity-IEA;kinase activity-IEA;ATP binding-IEA;protein phosphorylation-IEA \\ GO:000…		Protein kinase domain
TRINITY_DN68243_c0_g1	FvH4_6g25150.1	14.3742	6.72725	-7.647	-2.13672	0.00137257	0.18055	---NA---	pyrroline-5-carboxylate reductase [EC:1.5.1.2]	Pyrroline-5-carboxylate reductase
TRINITY_DN2146_c1_g1	FvH4_1g12590.1	22.031	10.299	-11.732	-2.13914	0.00492431	0.387394	putative dehydrin \\ 3.90E-137 \\ 89.67 % \\ GO:0016020-IEA;GO:0016021-IEA \\ membrane-IEA;integral component of membrane-IEA \\ GO:0016021 \\ integral component of membrane		Dehydrin
TRINITY_DN20901_c0_g2	FvH4_6g23820.1	4.25525	1.9875	-2.26775	-2.14101	1.23297e-05	0.0122529	cytoplasmic tRNA 2-thiolation protein 2 \\ 0.00E+00 \\ 83.79 % \\ GO:0016779-IEA;GO:0005737-IEA;GO:0008033-IEA;GO:0005829-IBA;GO:0034227-IEA;GO:0016783-IEA;GO:0016783-IBA;GO:0002098-IEA;GO:0002143-IBA;GO:0010311-IEA;GO:0000049-IEA;GO:0032447-IEA \\ nucleotidyltransferase activity-IEA;cytoplasm-IEA;tRNA processing-IEA;cytosol-IBA;tRNA thio-modification-IEA;sulfurtransferase activity-IEA;sulfurtran…	cytoplasmic tRNA 2-thiolation protein 2	Rossmann-like alpha/beta/alpha sandwich fold
TRINITY_DN2212_c1_g2	FvH4_4g07520.1	115.193	53.798	-61.395	-2.14121	0.00772703	0.501999	---NA---	Cd2+/Zn2+-exporting ATPase [EC:3.6.3.3 3.6.3.5]	P-type ATPase
TRINITY_DN7472_c0_g1	FvH4_6g02570.1	4.66425	2.17225	-2.492	-2.1472	0.00849715	0.529795	---NA---
TRINITY_DN990_c1_g2	FvH4_2g25610.1	71.156	33.1143	-38.0417	-2.1488	8.60296e-05	0.0370156	---NA---	general transcription factor 3C polypeptide 3 (transcription factor C subunit 4)	F-box domain
TRINITY_DN200208_c0_g1	FvH4_5g24400.1	8.0815	3.75825	-4.32325	-2.15034	0.00866585	0.536473	Glycosyl transferase \\ 0.00E+00 \\ 91.92 % \\ GO:0016779-IEA;GO:0016740-IEA;GO:0008773-IEA \\ nucleotidyltransferase activity-IEA;transferase activity-IEA;[protein-PII] uridylyltransferase activity-IEA \\ GO:0008773 \\ [protein-PII] uridylyltransferase activity		Glycosyl transferase, family 1
TRINITY_DN44_c0_g1	FvH4_4g32950.1	375.069	174.42	-200.649	-2.15038	0.00244017	0.254053	ATP-citrate synthase alpha chain protein 1 \\ 0.00E+00 \\ 97.23 % \\ GO:0016746-IEA;GO:0003878-IEA;GO:0003878-IBA;GO:0006085-IBA;GO:0005829-IBA;GO:0009346-IBA;GO:0016740-IEA;GO:0005524-IEA;GO:0006633-IBA \\ transferase activity, transferring acyl groups-IEA;ATP citrate synthase activity-IEA;ATP citrate synthase activity-IBA;acetyl-CoA biosynthetic process-IBA;cytosol-IBA;citrate lyase complex-IBA…	ATP citrate (pro-S)-lyase [EC:2.3.3.8]	ATP-grasp fold, succinyl-CoA synthetase-type
TRINITY_DN17705_c0_g1	FvH4_1g20570.1	1.41975	0.65975	-0.76	-2.15195	0.0360037	0.929067	haloacid dehalogenase-like hydrolase domain-containing protein At4g39970 \\ 4.70E-180 \\ 74.19 % \\ GO:0030749-IEA;GO:0016740-IEA;GO:0008168-IEA;GO:0032259-IEA \\ loganate O-methyltransferase activity-IEA;transferase activity-IEA;methyltransferase activity-IEA;methylation-IEA \\ GO:0008168 \\ methyltransferase activity		HAD superfamily
TRINITY_DN3213_c1_g2	FvH4_6g19330.1	1.37725	0.63875	-0.7385	-2.15616	0.0269605	0.929067	protein ORANGE-LIKE, chloroplastic \\ 0.00E+00 \\ 75.57 % \\ GO:0016310-IEA;GO:0004672-IEA;GO:0016740-IEA;GO:0016301-IEA;GO:0005524-IEA;GO:0006468-IEA \\ phosphorylation-IEA;protein kinase activity-IEA;transferase activity-IEA;kinase activity-IEA;ATP binding-IEA;protein phosphorylation-IEA \\ GO:0004672;GO:0005524;GO:0006468 \\ protein kinase activity;ATP binding;protein phosphorylation		Heat shock protein DnaJ, cysteine-rich domain superfamily
TRINITY_DN9241_c0_g1	FvH4_2g36680.1	12.7185	5.89775	-6.82075	-2.1565	0.000466828	0.0973702	putative peptidyl-tRNA hydrolase PTRHD1 \\ 2.90E-110 \\ 85.44 % \\ GO:0004045-IEA;GO:0016787-IEA \\ aminoacyl-tRNA hydrolase activity-IEA;hydrolase activity-IEA \\ GO:0004045 \\ aminoacyl-tRNA hydrolase activity		Peptidyl-tRNA hydrolase, PTH2
TRINITY_DN45_c0_g6	FvH4_6g06910.1	4.62	2.1415	-2.4785	-2.15737	0.000126101	0.0469744	putative transcription factor C2H2 family \\ 3.80E-26 \\ 76.13 % \\ GO:0016020-IEA;GO:0016021-IEA;GO:0016310-IEA;GO:0004672-IEA;GO:0016740-IEA;GO:0016301-IEA;GO:0005524-IEA;GO:0006468-IEA \\ membrane-IEA;integral component of membrane-IEA;phosphorylation-IEA;protein kinase activity-IEA;transferase activity-IEA;kinase activity-IEA;ATP binding-IEA;protein phosphorylation-IEA \\ GO:0016020;GO:001630…		Zinc finger, RING-type
TRINITY_DN16022_c0_g1	FvH4_6g02920.1	18.5177	8.5825	-9.93525	-2.15762	0.00161179	0.198777	sec-independent protein translocase protein TATA, chloroplastic \\ 9.80E-49 \\ 81.88 % \\ GO:0016020-IEA;GO:0016021-IEA;GO:0015031-IEA;GO:0008565-IEA;GO:0009306-IEA;GO:0005886-IEA \\ membrane-IEA;integral component of membrane-IEA;protein transport-IEA;protein transporter activity-IEA;protein secretion-IEA;plasma membrane-IEA \\ GO:0005886;GO:0008565;GO:0009306;GO:0016021 \\ plasma membrane;prote…	sec-independent protein translocase protein TatA
TRINITY_DN1330_c0_g1	FvH4_5g12380.1	12.344	5.71525	-6.62875	-2.15984	0.0115449	0.637473	---NA---		Cytochrome P450
TRINITY_DN2026_c0_g2	FvH4_1g15130.1	8.65775	4.0065	-4.65125	-2.16093	4.18886e-05	0.0247141	probable disease resistance protein At5g66900 \\ 0.00E+00 \\ 79.13 % \\ GO:0043531-IEA \\ ADP binding-IEA \\ GO:0043531 \\ ADP binding		NB-ARC
TRINITY_DN3154_c0_g1	FvH4_5g09670.1	1.03575	0.47925	-0.5565	-2.16119	0.0096861	0.57457	pentatricopeptide repeat-containing protein At5g50990 \\ 0.00E+00 \\ 84.30 % \\ GO:0008270-IEA \\ zinc ion binding-IEA \\ GO:0008270 \\ zinc ion binding		Pentatricopeptide repeat
TRINITY_DN31853_c0_g1	FvH4_5g22200.1	9.07975	4.198	-4.88175	-2.16288	0.018697	0.849347	PREDICTED: uncharacterized protein LOC105351684 \\ 0.00E+00 \\ 74.14 % \\ GO:0055085-IEA;GO:0016020-IEA;GO:0016021-IEA \\ transmembrane transport-IEA;membrane-IEA;integral component of membrane-IEA \\ GO:0016021;GO:0055085 \\ integral component of membrane;transmembrane transport
TRINITY_DN15574_c0_g1	FvH4_7g15480.1	9.03175	4.17475	-4.857	-2.16342	0.00218662	0.237033	late embryogenesis abundant protein At1g64065-like \\ 1.80E-166 \\ 89.59 % \\ GO:0055085-IEA;GO:0016020-IEA;GO:0016021-IEA;GO:0008643-IEA;GO:0022857-IEA \\ transmembrane transport-IEA;membrane-IEA;integral component of membrane-IEA;carbohydrate transport-IEA;transmembrane transporter activity-IEA \\ GO:0008643;GO:0016021;GO:0022857;GO:0055085 \\ carbohydrate transport;integral component of membra…		Late embryogenesis abundant protein, LEA-14
TRINITY_DN145485_c0_g1	FvH4_7g32970.1	41.6532	19.2402	-22.413	-2.1649	0.0428206	0.929067	protein TRANSPARENT TESTA GLABRA 1 \\ 0.00E+00 \\ 95.99 %	WD repeat-containing protein 68	WD40 repeat
TRINITY_DN7638_c0_g1	FvH4_5g01190.1	13.3395	6.146	-7.1935	-2.17044	0.0415557	0.929067	---NA---	histone deacetylase complex subunit SAP18	Sin3 associated polypeptide p18
TRINITY_DN65703_c0_g1	FvH4_4g36990.1	4.79	2.2045	-2.5855	-2.17283	0.000632666	0.115124	PREDICTED: uncharacterized protein LOC101314652 \\ 0.00E+00 \\ 88.26 %
TRINITY_DN1909_c0_g1	FvH4_6g01510.1	9.137	4.20175	-4.93525	-2.17457	9.89416e-06	0.0108586	tRNA-splicing endonuclease subunit Sen2-1-like \\ 4.10E-157 \\ 87.05 % \\ GO:0090305-IEA;GO:0000178-IEA;GO:0090501-IEA;GO:0003723-IEA;GO:0090502-IEA;GO:0004518-IEA;GO:0004519-IEA;GO:0016829-IEA;GO:0006388-IEA;GO:0016740-IEA;GO:0000213-IEA;GO:0003676-IEA \\ nucleic acid phosphodiester bond hydrolysis-IEA;exosome (RNase complex)-IEA;RNA phosphodiester bond hydrolysis-IEA;RNA binding-IEA;RNA phospho…	exosome complex component CSL4	tRNA-splicing endonuclease
TRINITY_DN4349_c0_g1	FvH4_4g00250.1	1047.9	480.957	-566.941	-2.17878	0.00734156	0.486495	beta-amyrin 28-oxidase-like \\ 0.00E+00 \\ 91.86 % \\ GO:0005506-IEA;GO:0046872-IEA;GO:0016491-IEA;GO:0016705-IEA;GO:0016020-IEA;GO:0016021-IEA;GO:0020037-IEA;GO:0055114-IEA;GO:0004497-IEA \\ iron ion binding-IEA;metal ion binding-IEA;oxidoreductase activity-IEA;oxidoreductase activity, acting on paired donors, with incorporation or reduction of molecular oxygen-IEA;membrane-IEA;integral componen…	beta-amyrin 28-monooxygenase [EC:1.14.13.201]	Cytochrome P450
TRINITY_DN2394_c0_g2	FvH4_6g43180.1	3.379	1.55	-1.829	-2.18	0.0469681	0.929067	Peptidyl-prolyl cis-trans isomerase \\ 1.10E-64 \\ 94.95 % \\ GO:0015035-IEA;GO:0016491-IEA;GO:0045454-IEA;GO:0009055-IEA;GO:0055114-IEA;GO:0004791-IEA;GO:0022900-IEA;GO:0098869-IEA;GO:0005623-IEA \\ protein disulfide oxidoreductase activity-IEA;oxidoreductase activity-IEA;cell redox homeostasis-IEA;electron transfer activity-IEA;oxidation-reduction process-IEA;thioredoxin-disulfide reductase act…
TRINITY_DN2689_c1_g1	FvH4_6g10800.1	1.08925	0.4995	-0.58975	-2.18068	0.0410838	0.929067	receptor-like protein 12 \\ 0.00E+00 \\ 79.09 % \\ GO:0016020-IEA;GO:0016021-IEA \\ membrane-IEA;integral component of membrane-IEA \\ GO:0016021 \\ integral component of membrane		Leucine-rich repeat
TRINITY_DN1005_c0_g1	FvH4_3g21940.1	73.5952	33.7408	-39.8545	-2.1812	0.000417736	0.0921116	thiamine thiazole synthase, chloroplastic-like \\ 0.00E+00 \\ 93.14 % \\ GO:0009570-IEA;GO:0009507-IEA;GO:0046872-IEA;GO:0005829-IEA;GO:0052837-IEA;GO:0009536-IEA;GO:0009228-IEA \\ chloroplast stroma-IEA;chloroplast-IEA;metal ion binding-IEA;cytosol-IEA;thiazole biosynthetic process-IEA;plastid-IEA;thiamine biosynthetic process-IEA \\ GO:0005829;GO:0009228;GO:0009570;GO:0046872;GO:0052837 \\ cyto…		Thiazole biosynthetic enzyme Thi4 family
TRINITY_DN2026_c5_g1	FvH4_1g10470.1	22.7778	10.433	-12.3448	-2.18324	0.000186044	0.0578352	probable serine/threonine-protein kinase PIX13 \\ 0.00E+00 \\ 88.37 % \\ GO:0000166-IEA;GO:0016310-IEA;GO:0004672-IEA;GO:0016740-IEA;GO:0016301-IEA;GO:0004674-IEA;GO:0005524-IEA;GO:0006468-IEA \\ nucleotide binding-IEA;phosphorylation-IEA;protein kinase activity-IEA;transferase activity-IEA;kinase activity-IEA;protein serine/threonine kinase activity-IEA;ATP binding-IEA;protein phosphorylation-IE…		Protein kinase domain
TRINITY_DN8003_c0_g1	FvH4_6g45650.1	3.772	1.727	-2.045	-2.18413	0.00398852	0.340879	Glucose-repressible alcohol dehydrogenase transcriptional effector like \\ 2.50E-30 \\ 88.57 %
TRINITY_DN2509_c0_g3	FvH4_4g00400.1	4.891	2.23675	-2.65425	-2.18665	0.000567834	0.109765	---NA---	aarF domain-containing kinase	UbiB domain
TRINITY_DN8172_c0_g1	FvH4_5g36220.1	8.10975	3.70825	-4.4015	-2.18695	0.011875	0.648984	putative clathrin assembly protein At4g40080 \\ 0.00E+00 \\ 85.21 % \\ GO:0016757-IEA;GO:0016758-IEA;GO:0016740-IEA;GO:0047215-IEA \\ transferase activity, transferring glycosyl groups-IEA;transferase activity, transferring hexosyl groups-IEA;transferase activity-IEA;indole-3-acetate beta-glucosyltransferase activity-IEA \\ GO:0047215 \\ indole-3-acetate beta-glucosyltransferase activity		ENTH/VHS
TRINITY_DN6212_c0_g1	FvH4_2g34900.1	33.6007	15.3637	-18.237	-2.18701	0.00341647	0.311118	serine carboxypeptidase II-3-like \\ 0.00E+00 \\ 79.00 % \\ GO:0004180-IEA;GO:0008233-IEA;GO:0006508-IEA;GO:0004185-IEA;GO:0004185-IBA;GO:0005773-IBA;GO:0051603-IBA;GO:0016787-IEA \\ carboxypeptidase activity-IEA;peptidase activity-IEA;proteolysis-IEA;serine-type carboxypeptidase activity-IEA;serine-type carboxypeptidase activity-IBA;vacuole-IBA;proteolysis involved in cellular protein catabolic …	serine carboxypeptidase-like clade II [EC:3.4.16.-]	Peptidase S10, serine carboxypeptidase
TRINITY_DN6692_c0_g1	FvH4_5g39200.1	81.1775	37.0983	-44.0792	-2.18818	0.000351331	0.0833856	bZIP transcription factor 53-like \\ 0.00E+00 \\ 72.37 % \\ GO:0051213-IEA;GO:0046872-IEA;GO:0016491-IEA;GO:0016707-IEA;GO:0055114-IEA \\ dioxygenase activity-IEA;metal ion binding-IEA;oxidoreductase activity-IEA;gibberellin 3-beta-dioxygenase activity-IEA;oxidation-reduction process-IEA \\ GO:0016707;GO:0046872;GO:0055114 \\ gibberellin 3-beta-dioxygenase activity;metal ion binding;oxidation-red…		Basic-leucine zipper domain
TRINITY_DN4106_c0_g1	FvH4_6g32710.1	93.719	42.8285	-50.8905	-2.18824	0.000547756	0.107219	hypothetical protein RchiOBHm_Chr2g0141731 \\ 2.30E-93 \\ 65.04 %
TRINITY_DN6846_c0_g1	FvH4_6g40640.1	15.6065	7.12225	-8.48425	-2.19123	0.000132041	0.0480826	alpha-1,6-mannosyl-glycoprotein 2-beta-N-acetylglucosaminyltransferase \\ 0.00E+00 \\ 87.46 % \\ GO:0016757-IEA;GO:0016020-IEA;GO:0016021-IEA;GO:0008455-IEA;GO:0005795-IEA;GO:0009312-IEA;GO:0016740-IEA \\ transferase activity, transferring glycosyl groups-IEA;membrane-IEA;integral component of membrane-IEA;alpha-1,6-mannosylglycoprotein 2-beta-N-acetylglucosaminyltransferase activity-IEA;Golgi st…	alpha-1,6-mannosyl-glycoprotein beta-1,2-N-acetylglucosaminyltransferase [EC:2.4.1.143]	N-acetylglucosaminyltransferase II
TRINITY_DN6238_c0_g1	FvH4_5g39190.1	25.0995	11.4267	-13.6728	-2.19656	0.00267097	0.269343	calvin cycle protein CP12-1, chloroplastic \\ 5.30E-29 \\ 92.91 % \\ GO:0038023-IBA;GO:0016020-IEA;GO:0016021-IEA;GO:0006882-IBA;GO:0005623-IEA \\ signaling receptor activity-IBA;membrane-IEA;integral component of membrane-IEA;cellular zinc ion homeostasis-IBA;cell-IEA \\ GO:0005623;GO:0006882;GO:0016021;GO:0038023 \\ cell;cellular zinc ion homeostasis;integral component of membrane;signaling rec…		Domain of unknown function CP12
TRINITY_DN11420_c0_g1	FvH4_5g29910.1	1.43825	0.65475	-0.7835	-2.19664	0.00415	0.347983	purple acid phosphatase 23 \\ 0.00E+00 \\ 94.21 % \\ GO:0046872-IEA;GO:0016020-IEA;GO:0016021-IEA;GO:0016311-IEA;GO:0003993-IEA;GO:0016787-IEA \\ metal ion binding-IEA;membrane-IEA;integral component of membrane-IEA;dephosphorylation-IEA;acid phosphatase activity-IEA;hydrolase activity-IEA \\ GO:0003993;GO:0016021;GO:0016311;GO:0046872 \\ acid phosphatase activity;integral component of membrane;d…		Calcineurin-like phosphoesterase domain, ApaH type
TRINITY_DN3029_c0_g2	FvH4_6g39740.1	2.5895	1.17825	-1.41125	-2.19775	0.00122125	0.168638	---NA---		Pentatricopeptide repeat
TRINITY_DN201987_c0_g1	FvH4_7g09310.1	14.685	6.6805	-8.0045	-2.19819	0.000910632	0.140903	PGG domain containing protein \\ 1.90E-91 \\ 67.74 % \\ GO:0016020-IEA;GO:0016021-IEA \\ membrane-IEA;integral component of membrane-IEA		PGG domain
TRINITY_DN1683_c0_g1	FvH4_3g21170.1	2.87775	1.30525	-1.5725	-2.20475	0.0112919	0.62824	F-box/LRR-repeat protein At4g14103-like \\ 8.20E-80 \\ 64.47 %		Leucine-rich repeat domain superfamily
TRINITY_DN6432_c1_g1	FvH4_4g33230.1	12.4743	5.657	-6.81725	-2.2051	0.00704496	0.47445	G-type lectin S-receptor-like serine/threonine-protein kinase At1g34300 \\ 0.00E+00 \\ 82.10 % \\ GO:0000166-IEA;GO:0048544-IEA;GO:0016020-IEA;GO:0016021-IEA;GO:0016310-IEA;GO:0016740-IEA;GO:0004672-IEA;GO:0016301-IEA;GO:0004674-IEA;GO:0030246-IEA;GO:0005524-IEA;GO:0006468-IEA \\ nucleotide binding-IEA;recognition of pollen-IEA;membrane-IEA;integral component of membrane-IEA;phosphorylation-IEA;t…		Protein kinase domain
TRINITY_DN2026_c1_g3	FvH4_1g15380.1	4.28325	1.94025	-2.343	-2.20758	0.00384164	0.333053	probable disease resistance protein At5g66900 \\ 0.00E+00 \\ 61.85 % \\ GO:0006508-IEA;GO:0043531-IEA;GO:0008234-IEA \\ proteolysis-IEA;ADP binding-IEA;cysteine-type peptidase activity-IEA		NB-ARC
TRINITY_DN3400_c0_g1	FvH4_6g40190.1	2.0765	0.94025	-1.13625	-2.20846	0.00768772	0.49997	flowering time control protein FPA \\ 0.00E+00 \\ 91.70 % \\ GO:0003723-IEA;GO:0003676-IEA \\ RNA binding-IEA;nucleic acid binding-IEA \\ GO:0003723 \\ RNA binding		RNA recognition motif domain
TRINITY_DN13105_c0_g1	FvH4_3g16950.1	13.2498	5.99875	-7.251	-2.20875	0.0140529	0.718792	BAHD acyltransferase At5g47980-like \\ 0.00E+00 \\ 71.89 % \\ GO:0016746-IEA;GO:0016747-IEA;GO:0016740-IEA;GO:0050636-IEA \\ transferase activity, transferring acyl groups-IEA;transferase activity, transferring acyl groups other than amino-acyl groups-IEA;transferase activity-IEA;vinorine synthase activity-IEA \\ GO:0050636 \\ vinorine synthase activity	shikimate O-hydroxycinnamoyltransferase [EC:2.3.1.133]	Transferase
TRINITY_DN1589_c1_g1	FvH4_4g11640.1	17.7252	8.0195	-9.70575	-2.21027	0.000668258	0.11791	mitochondrial import inner membrane translocase subunit tim16 \\ 7.20E-146 \\ 74.56 % \\ GO:0007165-IEA;GO:0043531-IEA;GO:0016787-IEA \\ signal transduction-IEA;ADP binding-IEA;hydrolase activity-IEA	mitochondrial import inner membrane translocase subunit TIM16	Mitochondrial import inner membrane translocase subunit Tim16
TRINITY_DN32_c1_g2	FvH4_3g29740.1	82.6072	37.326	-45.2812	-2.21313	0.000930354	0.142683	pleiotropic drug resistance protein 2-like \\ 0.00E+00 \\ 93.43 % \\ GO:0000166-IEA;GO:0016020-IEA;GO:0016021-IEA;GO:0042908-IEA;GO:0102026-IEA;GO:0016787-IEA;GO:0016887-IEA;GO:0015623-IEA;GO:0015688-IEA;GO:0055085-IEA;GO:0008559-IEA;GO:0006855-IEA;GO:0005524-IEA \\ nucleotide binding-IEA;membrane-IEA;integral component of membrane-IEA;xenobiotic transport-IEA;ferric dicitrate transporter activit…		ABC transporter-like
TRINITY_DN16434_c0_g1	FvH4_4g27220.1	4.24175	1.91375	-2.328	-2.21646	0.0106997	0.607605	VQ motif-containing protein 20-like \\ 0.00E+00 \\ 66.55 % \\ GO:0016020-IEA;GO:0016021-IEA \\ membrane-IEA;integral component of membrane-IEA		VQ
TRINITY_DN2481_c0_g1	FvH4_6g36520.1	380.236	171.429	-208.806	-2.21803	0.00122543	0.168912	beta-amyrin synthase-like \\ 0.00E+00 \\ 92.32 % \\ GO:0016866-IEA;GO:0016853-IEA \\ intramolecular transferase activity-IEA;isomerase activity-IEA \\ GO:0016866 \\ intramolecular transferase activity	beta-amyrin synthase [EC:5.4.99.39]	Terpene synthase, conserved site
TRINITY_DN15177_c0_g1	FvH4_6g12430.1	30.519	13.7573	-16.7617	-2.21839	0.0381297	0.929067	laccase-7-like \\ 0.00E+00 \\ 89.36 % \\ GO:0048046-IEA;GO:0046274-IEA;GO:0046872-IEA;GO:0016491-IEA;GO:0005507-IEA;GO:0055114-IEA;GO:0052716-IEA;GO:0005576-IEA \\ apoplast-IEA;lignin catabolic process-IEA;metal ion binding-IEA;oxidoreductase activity-IEA;copper ion binding-IEA;oxidation-reduction process-IEA;hydroquinone:oxygen oxidoreductase activity-IEA;extracellular region-IEA \\ GO:0005507;G…	laccase [EC:1.10.3.2]	Multicopper oxidase, type 1
TRINITY_DN228_c1_g1	FvH4_5g23990.1	24.0862	10.8468	-13.2395	-2.2206	0.000160927	0.0532089	probable ribosomal protein S11, mitochondrial \\ 6.20E-14 \\ 79.12 % \\ GO:0005634-IEA \\ nucleus-IEA \\ GO:0005634 \\ nucleus	phosphoribosylglycinamide formyltransferase [EC:2.1.2.2]	Phosphoribosylglycinamide formyltransferase, active site
TRINITY_DN20899_c0_g2	FvH4_6g40490.1	2.01525	0.90725	-1.108	-2.22127	0.0118144	0.646796	ribulose-1,5 bisphosphate carboxylase/oxygenase large subunit N-methyltransferase, chloroplastic \\ 0.00E+00 \\ 93.82 % \\ GO:0009507-IEA;GO:0016740-IEA;GO:0008168-IEA;GO:0018026-IBA;GO:0016279-IBA;GO:0030785-IEA;GO:0032259-IEA \\ chloroplast-IEA;transferase activity-IEA;methyltransferase activity-IEA;peptidyl-lysine monomethylation-IBA;protein-lysine N-methyltransferase activity-IBA;[ribulose-bi…		SET domain
TRINITY_DN313_c0_g1	FvH4_4g34790.1	3.78125	1.70225	-2.079	-2.22132	0.000346338	0.0827103	potassium transporter 6-like \\ 0.00E+00 \\ 90.60 % \\ GO:0071805-IEA;GO:0006813-IEA;GO:0015079-IEA;GO:0016020-IEA;GO:0016021-IEA;GO:0006811-IEA \\ potassium ion transmembrane transport-IEA;potassium ion transport-IEA;potassium ion transmembrane transporter activity-IEA;membrane-IEA;integral component of membrane-IEA;ion transport-IEA \\ GO:0015079;GO:0016021;GO:0071805 \\ potassium ion transmemb…		Potassium transporter
TRINITY_DN5939_c0_g1	FvH4_6g11110.1	1.35175	0.60825	-0.7435	-2.22236	0.0123322	0.664327	dnaJ protein ERDJ3A \\ 0.00E+00 \\ 81.80 % \\ GO:0009408-IEA;GO:0016491-IEA;GO:0009860-IEA;GO:0055114-IEA;GO:0009506-IEA;GO:0005788-IEA \\ response to heat-IEA;oxidoreductase activity-IEA;pollen tube growth-IEA;oxidation-reduction process-IEA;plasmodesma-IEA;endoplasmic reticulum lumen-IEA \\ GO:0005788;GO:0009408;GO:0009506;GO:0009860;GO:0016491;GO:0055114 \\ endoplasmic reticulum lumen;response…		DnaJ domain
TRINITY_DN6079_c0_g1	FvH4_6g24730.1	2.4125	1.08475	-1.32775	-2.22401	0.000195145	0.0592299	probable inactive purple acid phosphatase 16 isoform X1 \\ 0.00E+00 \\ 90.99 % \\ GO:0008233-IEA;GO:0006508-IEA;GO:0008234-IEA;GO:0016787-IEA \\ peptidase activity-IEA;proteolysis-IEA;cysteine-type peptidase activity-IEA;hydrolase activity-IEA \\ GO:0006508;GO:0008234 \\ proteolysis;cysteine-type peptidase activity		Calcineurin-like phosphoesterase domain, ApaH type
TRINITY_DN840_c0_g1	FvH4_7g24590.1	172.731	77.6425	-95.0883	-2.22469	0.0159241	0.773456	omega-3 fatty acid desaturase, chloroplastic \\ 0.00E+00 \\ 88.52 % \\ GO:0016717-IEA;GO:0016020-IEA;GO:0006629-IEA;GO:0016021-IEA;GO:0055114-IEA \\ oxidoreductase activity, acting on paired donors, with oxidation of a pair of donors resulting in the reduction of molecular oxygen to two molecules of water-IEA;membrane-IEA;lipid metabolic process-IEA;integral component of membrane-IEA;oxidation-re…	acyl-lipid omega-3 desaturase [EC:1.14.19.25 1.14.19.35 1.14.19.36]	Fatty acid desaturase domain
TRINITY_DN1035_c0_g1	FvH4_7g15800.1	1.7445	0.784	-0.9605	-2.22513	0.000156801	0.052506	GDSL esterase/lipase At4g01130 isoform X1 \\ 0.00E+00 \\ 90.02 % \\ GO:0008152-IEA;GO:0016020-IEA;GO:0016021-IEA;GO:0004560-IEA;GO:0016787-IEA;GO:0016798-IEA;GO:0016788-IEA \\ metabolic process-IEA;membrane-IEA;integral component of membrane-IEA;alpha-L-fucosidase activity-IEA;hydrolase activity-IEA;hydrolase activity, acting on glycosyl bonds-IEA;hydrolase activity, acting on ester bonds-IEA \\ …		GDSL lipase/esterase
TRINITY_DN118_c0_g1	FvH4_2g02540.1	50.7583	22.7568	-28.0015	-2.23047	0.00412325	0.34659	receptor-like protein kinase HAIKU2 \\ 0.00E+00 \\ 80.74 % \\ GO:0000166-IEA;GO:0016020-IEA;GO:0016021-IEA;GO:0016310-IEA;GO:0016740-IEA;GO:0004672-IEA;GO:0016301-IEA;GO:0004674-IEA;GO:0005524-IEA;GO:0006468-IEA \\ nucleotide binding-IEA;membrane-IEA;integral component of membrane-IEA;phosphorylation-IEA;transferase activity-IEA;protein kinase activity-IEA;kinase activity-IEA;protein serine/threo…		Protein kinase domain
TRINITY_DN2363_c0_g1	FvH4_7g27800.1	12.3185	5.517	-6.8015	-2.23283	0.0193956	0.86786	21 kDa protein-like		Pectinesterase inhibitor domain
TRINITY_DN7023_c0_g1	FvH4_3g04690.1	18.8905	8.45475	-10.4358	-2.23431	0.00443277	0.362613	---NA---	polyphenol oxidase [EC:1.10.3.1]	Polyphenol oxidase, C-terminal
TRINITY_DN1539_c0_g1	FvH4_6g28480.1	28.85	12.91	-15.94	-2.2347	0.0129768	0.684236	chaperone protein dnaJ 8, chloroplastic \\ 1.10E-32 \\ 89.48 %
TRINITY_DN322_c0_g1	FvH4_7g04530.1	9.24925	4.13675	-5.1125	-2.23587	5.34247e-05	0.0289804	exportin-7 isoform X1 \\ 0.00E+00 \\ 97.49 % \\ GO:0005737-IBA;GO:0005643-IBA;GO:0005049-IBA;GO:0005634-IEA;GO:0008536-IEA;GO:0006886-IEA;GO:0006611-IBA \\ cytoplasm-IBA;nuclear pore-IBA;nuclear export signal receptor activity-IBA;nucleus-IEA;Ran GTPase binding-IEA;intracellular protein transport-IEA;protein export from nucleus-IBA \\ GO:0005049;GO:0005643;GO:0005737;GO:0006611;GO:0008536 \\ nucl…		Importin-beta, N-terminal domain
TRINITY_DN3578_c0_g1	FvH4_6g23260.1	5.17125	2.31275	-2.8585	-2.23597	5.74858e-05	0.0299106	putative EGF-like domain, exostosin \\ 0.00E+00 \\ 91.12 % \\ GO:0016757-IEA;GO:0016020-IEA;GO:0010409-IEA;GO:0016021-IEA;GO:0080147-IEA;GO:0006486-IEA;GO:0005794-IEA \\ transferase activity, transferring glycosyl groups-IEA;membrane-IEA;extensin metabolic process-IEA;integral component of membrane-IEA;root hair cell development-IEA;protein glycosylation-IEA;Golgi apparatus-IEA \\ GO:0005794;GO:0…		EGF-like domain
TRINITY_DN11861_c0_g2	FvH4_4g19170.1	907.31	405.405	-501.905	-2.23803	0.0283468	0.929067	major allergen Pru av 1-like \\ 3.60E-39 \\ 86.64 %		Bet v I/Major latex protein
TRINITY_DN3202_c0_g1	FvH4_4g20750.1	2.35275	1.048	-1.30475	-2.24499	0.0106371	0.605818	transcription factor MYB108 \\ 1.40E-166 \\ 68.65 % \\ GO:0003677-IEA;GO:0043565-IBA;GO:0005634-IBA \\ DNA binding-IEA;sequence-specific DNA binding-IBA;nucleus-IBA \\ GO:0003677 \\ DNA binding	transcription factor MYB, plant	SANT/Myb domain
TRINITY_DN7782_c0_g1	FvH4_1g02500.1	5.306	2.36175	-2.94425	-2.24664	0.00131344	0.175709	---NA---		AdipoR/Haemolysin-III-related
TRINITY_DN23143_c0_g1	FvH4_6g40740.1	6.89425	3.06775	-3.8265	-2.24733	0.00191624	0.218386	---NA---	exosome complex component RRP42	Exoribonuclease, phosphorolytic domain 1
TRINITY_DN630_c0_g1	FvH4_3g02620.1	19.6575	8.743	-10.9145	-2.24837	0.0422109	0.929067	---NA---		Pentatricopeptide repeat
TRINITY_DN9945_c0_g1	FvH4_2g16180.1	19.752	8.78175	-10.9702	-2.24921	0.00568308	0.419049	NAC transcription factor \\ 1.10E-67 \\ 92.41 % \\ GO:0003677-IEA;GO:0045792-IEA;GO:0006355-IEA;GO:0010200-IEA;GO:0005634-IEA;GO:0009965-IEA;GO:0048281-IEA \\ DNA binding-IEA;negative regulation of cell size-IEA;regulation of transcription, DNA-templated-IEA;response to chitin-IEA;nucleus-IEA;leaf morphogenesis-IEA;inflorescence morphogenesis-IEA \\ GO:0003677;GO:0005634;GO:0006355;GO:0009965;GO:…		NAC domain
TRINITY_DN910_c0_g1	FvH4_7g17810.1	1.2145	0.5395	-0.675	-2.25116	0.000278169	0.0718921	caffeic acid 3-O-methyltransferase-like \\ 0.00E+00 \\ 89.95 % \\ GO:0008171-IEA;GO:0047763-IEA;GO:0046983-IEA;GO:0016740-IEA;GO:0008168-IEA;GO:0032259-IEA \\ O-methyltransferase activity-IEA;caffeate O-methyltransferase activity-IEA;protein dimerization activity-IEA;transferase activity-IEA;methyltransferase activity-IEA;methylation-IEA \\ GO:0032259;GO:0046983;GO:0047763 \\ methylation;protein …	caffeic acid 3-O-methyltransferase [EC:2.1.1.68]	O-methyltransferase, family 2
TRINITY_DN19944_c0_g5	FvH4_6g53290.1	6.74075	2.99425	-3.7465	-2.25123	0.00160547	0.198235	30S ribosomal protein S21, chloroplastic-like \\ 1.60E-171 \\ 80.64 % \\ GO:0016310-IEA;GO:0016740-IEA;GO:0016301-IEA;GO:0006139-IEA;GO:0019205-IEA;GO:0005524-IEA \\ phosphorylation-IEA;transferase activity-IEA;kinase activity-IEA;nucleobase-containing compound metabolic process-IEA;nucleobase-containing compound kinase activity-IEA;ATP binding-IEA \\ GO:0005524;GO:0006139;GO:0016310;GO:0019205 \…		Ribosomal protein S21
TRINITY_DN770_c1_g1	FvH4_2g07400.1	2.54425	1.13	-1.41425	-2.25155	0.00267014	0.269343	extra-large guanine nucleotide-binding protein 1-like \\ 0.00E+00 \\ 80.07 % \\ GO:0000166-IEA;GO:0005525-IEA;GO:0009617-IEA;GO:0007165-IEA;GO:0003924-IEA;GO:0019001-IEA;GO:0007186-IEA;GO:0031683-IEA;GO:0042742-IEA;GO:0005634-IEA \\ nucleotide binding-IEA;GTP binding-IEA;response to bacterium-IEA;signal transduction-IEA;GTPase activity-IEA;guanyl nucleotide binding-IEA;G protein-coupled receptor …		Guanine nucleotide binding protein (G-protein), alpha subunit
TRINITY_DN3467_c0_g1	FvH4_3g04160.1	8.0515	3.574	-4.4775	-2.2528	0.0119687	0.652948	CFE protein \\ 8.80E-122 \\ 76.45 % \\ GO:0016020-IEA;GO:0016021-IEA \\ membrane-IEA;integral component of membrane-IEA \\ GO:0016021 \\ integral component of membrane		Protein of unknown function DUF761, plant
TRINITY_DN8434_c0_g1	FvH4_2g06670.1	30.8885	13.678	-17.2105	-2.25826	0.00384639	0.333228	probable membrane-associated kinase regulator 3 \\ 0.00E+00 \\ 71.64 %		Protein of unknown function DUF688
TRINITY_DN7241_c0_g1	FvH4_3g28370.1	41.5328	18.3897	-23.143	-2.25847	0.0134572	0.701839	glucan endo-1,3-beta-glucosidase-like \\ 0.00E+00 \\ 89.86 % \\ GO:0008152-IEA;GO:0042973-IEA;GO:0004553-IEA;GO:0016798-IEA;GO:0005975-IEA;GO:0016787-IEA \\ metabolic process-IEA;glucan endo-1,3-beta-D-glucosidase activity-IEA;hydrolase activity, hydrolyzing O-glycosyl compounds-IEA;hydrolase activity, acting on glycosyl bonds-IEA;carbohydrate metabolic process-IEA;hydrolase activity-IEA \\ GO:00…		Glycoside hydrolase family 17
TRINITY_DN4694_c1_g1	FvH4_3g08740.1	5.30525	2.34775	-2.9575	-2.25972	0.00193052	0.219056	MACPF domain-containing protein NSL1 \\ 0.00E+00 \\ 87.44 % \\ GO:0006955-IBA;GO:0009626-IBA;GO:0005886-IBA \\ immune response-IBA;plant-type hypersensitive response-IBA;plasma membrane-IBA \\ GO:0005886;GO:0009626 \\ plasma membrane;plant-type hypersensitive response		Membrane attack complex component/perforin (MACPF) domain
TRINITY_DN16703_c0_g1	FvH4_6g28280.1	3.37725	1.493	-1.88425	-2.26206	0.0279584	0.929067	organic cation/carnitine transporter 4 \\ 0.00E+00 \\ 87.43 % \\ GO:0055085-IEA;GO:0016020-IEA;GO:0016021-IEA;GO:0008643-IEA;GO:0022857-IEA;GO:0005215-IEA \\ transmembrane transport-IEA;membrane-IEA;integral component of membrane-IEA;carbohydrate transport-IEA;transmembrane transporter activity-IEA;transporter activity-IEA \\ GO:0008643;GO:0016021;GO:0022857;GO:0055085 \\ carbohydrate transport;i…		Major facilitator, sugar transporter-like
TRINITY_DN2139_c0_g1	FvH4_7g27150.1	20.2045	8.92425	-11.2802	-2.264	0.0054348	0.407851	protein DYAD-like \\ 0.00E+00 \\ 61.32 %
TRINITY_DN8823_c0_g1	FvH4_4g14240.1	21.5305	9.50075	-12.0297	-2.26619	0.000846489	0.135751	---NA---	speckle-type POZ protein	BTB/POZ domain
TRINITY_DN1603_c1_g1	FvH4_6g24120.1	28.8305	12.7175	-16.113	-2.26699	0.00051326	0.102609	heat stress transcription factor B-3	heat shock transcription factor, other eukaryote	Heat shock factor (HSF)-type, DNA-binding
TRINITY_DN7530_c0_g1	FvH4_6g51680.1	2.0325	0.89575	-1.13675	-2.26905	0.00788823	0.508182	---NA---		Homeobox-like domain superfamily
TRINITY_DN3067_c0_g1	FvH4_5g10410.1	1.23075	0.54225	-0.6885	-2.26971	0.0184693	0.843616	B3 domain-containing transcription factor NGA1-like \\ 0.00E+00 \\ 66.27 % \\ GO:0003677-IEA;GO:0006351-IEA;GO:0006355-IEA;GO:0005634-IEA \\ DNA binding-IEA;transcription, DNA-templated-IEA;regulation of transcription, DNA-templated-IEA;nucleus-IEA \\ GO:0003677;GO:0005634;GO:0006355 \\ DNA binding;nucleus;regulation of transcription, DNA-templated		B3 DNA binding domain
TRINITY_DN4364_c0_g2	FvH4_5g37930.1	37.1255	16.3558	-20.7698	-2.26987	0.0186415	0.848033	2,3-bisphosphoglycerate-dependent phosphoglycerate mutase-like \\ 0.00E+00 \\ 91.69 % \\ GO:0016868-IEA;GO:0003824-IEA;GO:0004619-IEA;GO:0006096-IEA;GO:0016853-IEA \\ intramolecular transferase activity, phosphotransferases-IEA;catalytic activity-IEA;phosphoglycerate mutase activity-IEA;glycolytic process-IEA;isomerase activity-IEA \\ GO:0004619;GO:0006096 \\ phosphoglycerate mutase activity;glyc…	2,3-bisphosphoglycerate-dependent phosphoglycerate mutase [EC:5.4.2.11]	Phosphoglycerate/bisphosphoglycerate mutase, active site
TRINITY_DN2620_c0_g2	FvH4_5g36070.1	28.8818	12.6963	-16.1855	-2.27483	0.00610216	0.435664	vegetative cell wall protein gp1 \\ 3.60E-150 \\ 84.06 %		Cytochrome c1, transmembrane anchor, C-terminal
TRINITY_DN8194_c0_g1	FvH4_6g02280.1	11.716	5.145	-6.571	-2.27716	0.0230492	0.929067	---NA---		Rubisco accumulation factor 1
TRINITY_DN5672_c0_g1	FvH4_5g03460.1	5.1315	2.2475	-2.884	-2.2832	0.0402034	0.929067	putative Late embryogenesis abundant protein, LEA-14		Late embryogenesis abundant protein, LEA-14
TRINITY_DN3317_c0_g2	FvH4_3g42290.1	109.147	47.6482	-61.4985	-2.29068	9.55733e-06	0.0107373	farnesyl pyrophosphate synthase \\ 2.40E-123 \\ 94.59 % \\ GO:0004337-IEA;GO:0008299-IEA;GO:0004161-IEA;GO:0016740-IEA \\ geranyltranstransferase activity-IEA;isoprenoid biosynthetic process-IEA;dimethylallyltranstransferase activity-IEA;transferase activity-IEA \\ GO:0004161;GO:0004337;GO:0008299 \\ dimethylallyltranstransferase activity;geranyltranstransferase activity;isoprenoid biosynthetic p…	farnesyl diphosphate synthase [EC:2.5.1.1 2.5.1.10]	Polyprenyl synthetase
TRINITY_DN3195_c0_g1	FvH4_5g03710.1	398.534	173.309	-225.225	-2.29955	0.00746107	0.491207	disease resistance response protein 206-like		Dirigent protein
TRINITY_DN5643_c0_g1	FvH4_2g40680.1	84.022	36.4277	-47.5942	-2.30654	0.00109164	0.156711	probable thylakoidal processing peptidase 2, chloroplastic \\ 1.50E-139 \\ 74.20 % \\ GO:0016020-IEA;GO:0006508-IEA;GO:0016021-IEA;GO:0008236-IEA;GO:0016787-IEA \\ membrane-IEA;proteolysis-IEA;integral component of membrane-IEA;serine-type peptidase activity-IEA;hydrolase activity-IEA \\ GO:0006508;GO:0008236;GO:0016021 \\ proteolysis;serine-type peptidase activity;integral component of membrane	signal peptidase I [EC:3.4.21.89]	Peptidase S26A, signal peptidase I
TRINITY_DN9199_c0_g1	FvH4_7g16500.1	3.09325	1.341	-1.75225	-2.30667	0.00500421	0.390331	---NA---
TRINITY_DN21852_c1_g1	FvH4_3g40320.1	4.38025	1.89625	-2.484	-2.30995	0.000868466	0.137628	probable serine/threonine-protein kinase WNK4 isoform X1 \\ 0.00E+00 \\ 90.10 % \\ GO:0016310-IEA;GO:0004672-IEA;GO:0016740-IEA;GO:0016301-IEA;GO:0004674-IEA;GO:0005524-IEA;GO:0006468-IEA \\ phosphorylation-IEA;protein kinase activity-IEA;transferase activity-IEA;kinase activity-IEA;protein serine/threonine kinase activity-IEA;ATP binding-IEA;protein phosphorylation-IEA \\ GO:0004674;GO:0005524;G…	WNK lysine deficient protein kinase [EC:2.7.11.1]	Protein kinase domain
TRINITY_DN6154_c0_g1	FvH4_1g12460.1	18.9423	8.2	-10.7423	-2.31003	0.00104582	0.153179	bifunctional epoxide hydrolase 2-like \\ 0.00E+00 \\ 94.96 % \\ GO:0055085-IEA;GO:0003824-IEA;GO:0016020-IEA;GO:0016021-IEA;GO:0022857-IEA;GO:0004301-IEA;GO:0016787-IEA \\ transmembrane transport-IEA;catalytic activity-IEA;membrane-IEA;integral component of membrane-IEA;transmembrane transporter activity-IEA;epoxide hydrolase activity-IEA;hydrolase activity-IEA \\ GO:0004301;GO:0016021;GO:0022857…		Alpha/beta hydrolase fold-1
TRINITY_DN6791_c0_g1	FvH4_4g23110.1	146.36	63.3035	-83.0562	-2.31203	0.0108212	0.611913	pyruvate dehydrogenase E1 component subunit beta-1, mitochondrial \\ 7.00E-180 \\ 95.26 % \\ GO:0005759-IEA;GO:0016491-IEA;GO:0005739-IEA;GO:0003824-IEA;GO:0006096-IEA;GO:0004739-IEA;GO:0006086-IEA;GO:0055114-IEA \\ mitochondrial matrix-IEA;oxidoreductase activity-IEA;mitochondrion-IEA;catalytic activity-IEA;glycolytic process-IEA;pyruvate dehydrogenase (acetyl-transferring) activity-IEA;acetyl-C…	pyruvate dehydrogenase E1 component beta subunit [EC:1.2.4.1]	Transketolase-like, pyrimidine-binding domain
TRINITY_DN17981_c0_g1	FvH4_2g19300.1	13.6527	5.89775	-7.755	-2.31491	0.000469557	0.0978008	pantoate--beta-alanine ligase \\ 0.00E+00 \\ 88.27 % \\ GO:0015940-IEA;GO:0003824-IEA;GO:0009058-IEA;GO:0004592-IEA;GO:0016874-IEA \\ pantothenate biosynthetic process-IEA;catalytic activity-IEA;biosynthetic process-IEA;pantoate-beta-alanine ligase activity-IEA;ligase activity-IEA \\ GO:0004592;GO:0015940 \\ pantoate-beta-alanine ligase activity;pantothenate biosynthetic process	pantoate--beta-alanine ligase [EC:6.3.2.1]	Pantoate-beta-alanine ligase
TRINITY_DN3650_c0_g1	FvH4_5g26440.1	32.3438	13.967	-18.3768	-2.31573	0.0185675	0.846168	---NA---		Basic-leucine zipper domain
TRINITY_DN23992_c0_g1	FvH4_5g35590.1	43.4395	18.745	-24.6945	-2.31739	0.013929	0.715387	probable pectinesterase/pectinesterase inhibitor 20 \\ 0.00E+00 \\ 83.63 % \\ GO:0004857-IEA;GO:0005618-IEA;GO:0043086-IEA;GO:0045330-IEA;GO:0030599-IEA;GO:0042545-IEA;GO:0045490-IEA;GO:0016787-IEA \\ enzyme inhibitor activity-IEA;cell wall-IEA;negative regulation of catalytic activity-IEA;aspartyl esterase activity-IEA;pectinesterase activity-IEA;cell wall modification-IEA;pectin catabolic proce…	pectinesterase [EC:3.1.1.11]	Pectinesterase, catalytic
TRINITY_DN5475_c0_g1	FvH4_6g42080.1	17.8203	7.67975	-10.1405	-2.32042	0.0154598	0.761149	probable tyrosine-protein phosphatase At1g05000 \\ 3.50E-125 \\ 87.11 % \\ GO:0005737-IBA;GO:0004725-IEA;GO:0004725-IBA;GO:0016791-IEA;GO:0016311-IEA;GO:0035335-IEA;GO:0016787-IEA \\ cytoplasm-IBA;protein tyrosine phosphatase activity-IEA;protein tyrosine phosphatase activity-IBA;phosphatase activity-IEA;dephosphorylation-IEA;peptidyl-tyrosine dephosphorylation-IEA;hydrolase activity-IEA \\ GO:00…	tyrosine-protein phosphatase SIW14 [EC:3.1.3.48]	Protein-tyrosine phosphatase, SIW14-like
TRINITY_DN7730_c0_g1	FvH4_5g02720.1	23.1152	9.9585	-13.1567	-2.32116	8.24228e-05	0.0364304	hydroxyproline-rich glycoprotein family protein \\ 0.00E+00 \\ 79.80 %
TRINITY_DN16127_c0_g1	FvH4_1g30090.1	222.671	95.9115	-126.76	-2.32164	0.0024157	0.25253	microsomal glutathione S-transferase 3-like \\ 1.20E-20 \\ 89.58 % \\ GO:0003677-IEA;GO:0003700-IEA;GO:0006351-IEA;GO:0046983-IEA;GO:0016020-IEA;GO:0016021-IEA;GO:0006355-IEA;GO:0000977-IEA;GO:0005634-IEA;GO:0045944-IEA \\ DNA binding-IEA;DNA-binding transcription factor activity-IEA;transcription, DNA-templated-IEA;protein dimerization activity-IEA;membrane-IEA;integral component of membrane-IEA…	glutathione S-transferase [EC:2.5.1.18]	Membrane-associated, eicosanoid/glutathione metabolism (MAPEG) protein
TRINITY_DN299143_c0_g1	FvH4_5g29270.1	5.50425	2.367	-3.13725	-2.32541	0.000736814	0.124788	legumin B-like \\ 8.00E-04 \\ 100.00 %		11-S seed storage protein, plant
TRINITY_DN203_c1_g1	FvH4_4g31150.1	3.15625	1.357	-1.79925	-2.3259	0.0346184	0.929067	---NA--- \\ 2.20E-45 \\ 72.27 % \\ GO:0005096-IBA;GO:0016020-IEA;GO:0050790-IEA;GO:0016021-IEA;GO:0030176-IBA;GO:0051020-IBA;GO:0005090-IBA;GO:0003400-IBA;GO:0009306-IBA;GO:0043547-IEA \\ GTPase activator activity-IBA;membrane-IEA;regulation of catalytic activity-IEA;integral component of membrane-IEA;integral component of endoplasmic reticulum membrane-IBA;GTPase binding-IBA;Sar guanyl-nucleotid…
TRINITY_DN14687_c1_g1	FvH4_1g17280.1	5.55675	2.38125	-3.1755	-2.33354	0.00741045	0.489271	BTB/POZ domain-containing protein At5g67385 \\ 0.00E+00 \\ 93.19 %		BTB/POZ domain
TRINITY_DN2390_c0_g1	FvH4_6g03170.1	180.107	77.173	-102.934	-2.33381	0.000276322	0.0716136	neurogenic locus notch-like protein \\ 8.20E-90 \\ 72.23 %
TRINITY_DN11302_c0_g1	FvH4_1g02430.1	4.23125	1.813	-2.41825	-2.33384	0.00568223	0.419049	---NA---		Armadillo-like helical
TRINITY_DN4615_c4_g2	FvH4_3g17330.1	231.786	99.3012	-132.485	-2.33417	4.13734e-05	0.0245586	probable solanesyl-diphosphate synthase 3, chloroplastic \\ 0.00E+00 \\ 91.14 % \\ GO:0036422-IEA;GO:0008299-IEA;GO:0016740-IEA;GO:0015979-IEA;GO:0016765-IEA \\ heptaprenyl diphosphate synthase activity-IEA;isoprenoid biosynthetic process-IEA;transferase activity-IEA;photosynthesis-IEA;transferase activity, transferring alkyl or aryl (other than methyl) groups-IEA \\ GO:0008299;GO:0015979;GO:0036…	all-trans-nonaprenyl-diphosphate synthase [EC:2.5.1.84 2.5.1.85]	Polyprenyl synthetase
TRINITY_DN8128_c0_g1	FvH4_7g24490.1	3.3755	1.4455	-1.93	-2.33518	0.00776209	0.503849	putative serine/threonine-protein kinase-like protein CCR3 \\ 0.00E+00 \\ 81.20 % \\ GO:0016020-IEA;GO:0016021-IEA;GO:0016310-IEA;GO:0004672-IEA;GO:0016740-IEA;GO:0016301-IEA;GO:0005524-IEA;GO:0006468-IEA \\ membrane-IEA;integral component of membrane-IEA;phosphorylation-IEA;protein kinase activity-IEA;transferase activity-IEA;kinase activity-IEA;ATP binding-IEA;protein phosphorylation-IEA \\ GO:…		Protein kinase domain
TRINITY_DN3167_c0_g1	FvH4_4g32900.1	4.76875	2.04025	-2.7285	-2.33734	0.00102314	0.151466	Transmembrane protein \\ 6.80E-119 \\ 83.63 % \\ GO:0016020-IEA;GO:0016021-IEA \\ membrane-IEA;integral component of membrane-IEA \\ GO:0016021 \\ integral component of membrane
TRINITY_DN2685_c3_g1	FvH4_2g08160.1	4.71925	2.015	-2.70425	-2.34206	0.013716	0.708974	---NA--- \\ 3.50E-136 \\ 89.30 % \\ GO:0046872-IEA;GO:0005618-IBA;GO:0030145-IEA;GO:0005576-IEA;GO:0045735-IEA \\ metal ion binding-IEA;cell wall-IBA;manganese ion binding-IEA;extracellular region-IEA;nutrient reservoir activity-IEA \\ GO:0005576;GO:0005618;GO:0030145;GO:0045735 \\ extracellular region;cell wall;manganese ion binding;nutrient reservoir activity
TRINITY_DN1881_c1_g1	FvH4_4g20030.1	39.7005	16.9492	-22.7513	-2.34232	0.00745164	0.491136	hypothetical protein Pyn_35600 \\ 9.70E-143 \\ 86.57 % \\ GO:0000166-IEA;GO:0016020-IEA;GO:0016021-IEA;GO:0016310-IEA;GO:0016740-IEA;GO:0004672-IEA;GO:0016301-IEA;GO:0004674-IEA;GO:0005524-IEA;GO:0006468-IEA \\ nucleotide binding-IEA;membrane-IEA;integral component of membrane-IEA;phosphorylation-IEA;transferase activity-IEA;protein kinase activity-IEA;kinase activity-IEA;protein serine/threonine…
TRINITY_DN7268_c0_g1	FvH4_4g03310.1	1.0935	0.46675	-0.62675	-2.3428	0.0203962	0.896484	1-aminocyclopropane-1-carboxylate oxidase homolog 1-like \\ 0.00E+00 \\ 52.55 %		Oxoglutarate/iron-dependent dioxygenase
TRINITY_DN6062_c1_g1	FvH4_2g24300.1	2.85325	1.2175	-1.63575	-2.34353	0.00126058	0.17174	---NA---		Protein kinase domain
TRINITY_DN6335_c2_g1	FvH4_3g20550.1	15.4877	6.6005	-8.88725	-2.34645	0.0014513	0.187071	CBS domain-containing protein CBSX5-like \\ 0.00E+00 \\ 68.24 %		CBS domain
TRINITY_DN10969_c0_g1	FvH4_6g02330.1	1.1095	0.47275	-0.63675	-2.34691	0.0124663	0.668612	methyltransferase-like protein 6 \\ 9.50E-61 \\ 86.27 % \\ GO:0003688-IBA;GO:0006270-IBA;GO:0006260-IEA;GO:0000808-IEA;GO:0009744-IEA;GO:0018024-IEA;GO:0034968-IEA;GO:0005664-IBA;GO:0005634-IEA \\ DNA replication origin binding-IBA;DNA replication initiation-IBA;DNA replication-IEA;origin recognition complex-IEA;response to sucrose-IEA;histone-lysine N-methyltransferase activity-IEA;histone lysin…	methyltransferase-like protein 6 [EC:2.1.1.-]	Methyltransferase-like
TRINITY_DN5807_c0_g1	FvH4_4g27890.1	2.0225	0.86175	-1.16075	-2.34697	0.0171165	0.807147	ornithine decarboxylase-like \\ 5.00E-39 \\ 53.63 % \\ GO:0048870-IEA;GO:0048870-IMP;GO:0048870-IGI;GO:0030866-IEA;GO:0030866-IDA;GO:0097204-IEA;GO:0097204-IDA;GO:0005826-IEA;GO:0005826-IDA;GO:0005829-IEA;GO:0005829-IDA;GO:0031034-IEA;GO:0031034-IDA;GO:0032009-IEA;GO:0032009-IDA;GO:0030864-IEA;GO:0030864-IDA;GO:0034461-IEA;GO:0034461-IMP;GO:0031270-IEA;GO:0031270-IMP;GO:0032440-IEA;GO:0033298-IEA…	ornithine decarboxylase [EC:4.1.1.17]	Ornithine/DAP/Arg decarboxylase
TRINITY_DN197_c1_g1	FvH4_5g11090.1	6.917	2.946	-3.971	-2.34793	0.000326347	0.0798725	---NA---		Powdery mildew resistance protein, RPW8 domain
TRINITY_DN4775_c0_g1	FvH4_1g21150.1	36.8597	15.6867	-21.173	-2.34974	0.00811787	0.517315	PLAT domain-containing protein 3-like \\ 0.00E+00 \\ 74.57 % \\ GO:0003677-IEA \\ DNA binding-IEA \\ GO:0003677 \\ DNA binding		PLAT/LH2 domain
TRINITY_DN4853_c0_g1	FvH4_4g05770.1	13.3697	5.68825	-7.6815	-2.35042	0.0144166	0.729998	---NA---
TRINITY_DN3031_c0_g1	FvH4_5g13610.1	1.576	0.6705	-0.9055	-2.35048	0.017336	0.81376	RHOMBOID-like protein 12, mitochondrial \\ 2.20E-20 \\ 83.43 % \\ GO:0008233-IEA;GO:0005739-IEA;GO:0006508-IEA;GO:0016020-IEA;GO:0016021-IEA;GO:0004252-IEA;GO:0016787-IEA \\ peptidase activity-IEA;mitochondrion-IEA;proteolysis-IEA;membrane-IEA;integral component of membrane-IEA;serine-type endopeptidase activity-IEA;hydrolase activity-IEA \\ GO:0004252;GO:0005739;GO:0006508;GO:0016021 \\ serine-t…		Peptidase S54, rhomboid domain
TRINITY_DN1730_c0_g1	FvH4_7g02540.1	30.2668	12.8735	-17.3933	-2.35109	0.00386584	0.334255	proline-rich protein 4-like \\ 4.00E-129 \\ 85.35 % \\ GO:0008168-IEA;GO:0016740-IEA;GO:0032259-IEA \\ methyltransferase activity-IEA;transferase activity-IEA;methylation-IEA \\ GO:0008168;GO:0032259 \\ methyltransferase activity;methylation
TRINITY_DN20137_c0_g1	FvH4_3g20740.1	1.0925	0.46425	-0.62825	-2.35326	0.00969359	0.57457	peptidyl-prolyl cis-trans isomerase CYP37, chloroplastic isoform X1 \\ 1.00E-179 \\ 88.88 % \\ GO:0003755-IEA;GO:0000413-IEA;GO:0016853-IEA \\ peptidyl-prolyl cis-trans isomerase activity-IEA;protein peptidyl-prolyl isomerization-IEA;isomerase activity-IEA \\ GO:0000413;GO:0003755 \\ protein peptidyl-prolyl isomerization;peptidyl-prolyl cis-trans isomerase activity		Cyclophilin-type peptidyl-prolyl cis-trans isomerase domain
TRINITY_DN17592_c0_g1	FvH4_6g06320.1	48.3648	20.5267	-27.838	-2.35618	0.0379006	0.929067	---NA---		C2 domain
TRINITY_DN23128_c0_g4	FvH4_3g31410.1	8.32525	3.52875	-4.7965	-2.35926	0.000143718	0.049713	---NA---		P-loop containing nucleoside triphosphate hydrolase
TRINITY_DN230622_c0_g1	FvH4_1g12240.1	1.46175	0.61925	-0.8425	-2.36052	0.0244478	0.929067	probable leucine-rich repeat receptor-like protein kinase At1g35710 \\ 0.00E+00 \\ 79.96 % \\ GO:0032440-IEA;GO:0016491-IEA;GO:0046777-IBA;GO:0055114-IEA;GO:0016310-IEA;GO:0004672-IBA;GO:0016740-IEA;GO:0016301-IEA;GO:0009506-IBA;GO:0004674-IEA;GO:0006468-IEA \\ 2-alkenal reductase [NAD(P)] activity-IEA;oxidoreductase activity-IEA;protein autophosphorylation-IBA;oxidation-reduction process-IEA;pho…		Leucine-rich repeat
TRINITY_DN346_c0_g1	FvH4_4g36280.1	5.89375	2.4945	-3.39925	-2.3627	0.000803179	0.13126	putative tetratricopeptide-like helical domain, P-loop containing nucleoside triphosphate hydrolase \\ 0.00E+00 \\ 84.60 % \\ GO:0005524-IEA;GO:0016787-IEA \\ ATP binding-IEA;hydrolase activity-IEA \\ GO:0005524;GO:0016787 \\ ATP binding;hydrolase activity		Tetratricopeptide-like helical domain superfamily
TRINITY_DN234455_c0_g1	FvH4_7g28860.1	15.2995	6.47175	-8.82775	-2.36404	0.000917109	0.141621	LysM domain containing protein		LysM domain superfamily
TRINITY_DN9441_c0_g1	FvH4_3g13270.1	3.6785	1.55575	-2.12275	-2.36445	0.0223023	0.929067	LRR receptor-like serine/threonine-protein kinase GSO1 \\ 0.00E+00 \\ 88.37 % \\ GO:0000166-IEA;GO:0016491-IEA;GO:0016020-IEA;GO:0016021-IEA;GO:0055114-IEA;GO:0016310-IEA;GO:0016740-IEA;GO:0016301-IEA;GO:0032440-IEA;GO:0004672-IEA;GO:0004674-IEA;GO:0005524-IEA;GO:0006468-IEA \\ nucleotide binding-IEA;oxidoreductase activity-IEA;membrane-IEA;integral component of membrane-IEA;oxidation-reduction p…		Protein kinase domain
TRINITY_DN5412_c0_g1	FvH4_1g08660.1	1.449	0.6125	-0.8365	-2.36571	0.0100817	0.588218	RRP12-like protein \\ 0.00E+00 \\ 66.84 %		Armadillo-like helical
TRINITY_DN24900_c0_g2	FvH4_3g27180.1	5.097	2.153	-2.944	-2.36739	0.0147324	0.738794	Serine/threonine protein kinase \\ 1.10E-85 \\ 88.63 % \\ GO:0003729-IBA;GO:0016310-IEA;GO:0016301-IEA;GO:0004674-IEA;GO:0005634-IBA;GO:0006468-IEA \\ mRNA binding-IBA;phosphorylation-IEA;kinase activity-IEA;protein serine/threonine kinase activity-IEA;nucleus-IBA;protein phosphorylation-IEA \\ GO:0003729;GO:0004674;GO:0005634;GO:0006468 \\ mRNA binding;protein serine/threonine kinase activity;nu…		Forkhead-associated (FHA) domain
TRINITY_DN703_c0_g1	FvH4_5g38040.1	2558.81	1080.77	-1478.04	-2.36757	0.00618137	0.438265	protein DMR6-LIKE OXYGENASE 2-like \\ 0.00E+00 \\ 90.77 % \\ GO:0051213-IEA;GO:0016491-IEA;GO:0045486-IEA;GO:0046872-IEA;GO:0055114-IEA \\ dioxygenase activity-IEA;oxidoreductase activity-IEA;naringenin 3-dioxygenase activity-IEA;metal ion binding-IEA;oxidation-reduction process-IEA \\ GO:0045486;GO:0046872;GO:0055114 \\ naringenin 3-dioxygenase activity;metal ion binding;oxidation-reduction proc…		Oxoglutarate/iron-dependent dioxygenase
TRINITY_DN915_c0_g1	FvH4_6g01490.1	6.79675	2.87025	-3.9265	-2.368	7.34543e-06	0.00969425	U-box domain-containing protein 34-like \\ 0.00E+00 \\ 78.55 % \\ GO:0016020-IEA;GO:0016021-IEA;GO:0016310-IEA;GO:0004672-IEA;GO:0030247-IEA;GO:0016301-IEA;GO:0008889-IEA;GO:0005524-IEA;GO:0016787-IEA;GO:0006468-IEA \\ membrane-IEA;integral component of membrane-IEA;phosphorylation-IEA;protein kinase activity-IEA;polysaccharide binding-IEA;kinase activity-IEA;glycerophosphodiester phosphodiestera…		Protein kinase domain
TRINITY_DN8130_c0_g2	FvH4_1g10640.1	106.605	45.0072	-61.598	-2.36862	0.0129775	0.684236	endochitinase-like \\ 6.80E-167 \\ 91.75 % \\ GO:0016998-IEA;GO:0008152-IEA;GO:0004568-IEA;GO:0008061-IEA;GO:0006032-IEA;GO:0005975-IEA;GO:0016798-IEA;GO:0016787-IEA \\ cell wall macromolecule catabolic process-IEA;metabolic process-IEA;chitinase activity-IEA;chitin binding-IEA;chitin catabolic process-IEA;carbohydrate metabolic process-IEA;hydrolase activity, acting on glycosyl bonds-IEA;hydrola…	basic endochitinase B [EC:3.2.1.14]	Glycoside hydrolase, family 19, catalytic
TRINITY_DN11859_c0_g1	FvH4_6g16460.1	5.76875	2.43475	-3.334	-2.36934	0.00542941	0.407851	4-coumarate--CoA ligase-like 7 \\ 0.00E+00 \\ 78.48 % \\ GO:0047077-IEA;GO:0003987-IEA;GO:0003824-IEA;GO:0016491-IEA;GO:0016020-IEA;GO:0016021-IEA;GO:0055114-IEA;GO:0016874-IEA \\ Photinus-luciferin 4-monooxygenase (ATP-hydrolyzing) activity-IEA;acetate-CoA ligase activity-IEA;catalytic activity-IEA;oxidoreductase activity-IEA;membrane-IEA;integral component of membrane-IEA;oxidation-reduction pr…	4-coumarate--CoA ligase [EC:6.2.1.12]	AMP-dependent synthetase/ligase
TRINITY_DN1697_c0_g2	FvH4_6g13480.1	13.8637	5.848	-8.01575	-2.37068	0.0162007	0.781754	ATP-dependent zinc metalloprotease FTSH 10, mitochondrial-like \\ 0.00E+00 \\ 88.46 % \\ GO:0051301-IEA;GO:0006508-IEA;GO:0016020-IEA;GO:0016021-IEA;GO:0008053-IBA;GO:0042407-IBA;GO:0008270-IEA;GO:0008233-IEA;GO:0034982-IBA;GO:0008237-IEA;GO:0004222-IEA;GO:0005524-IEA;GO:0005743-IBA \\ cell division-IEA;proteolysis-IEA;membrane-IEA;integral component of membrane-IEA;mitochondrial fusion-IBA;crist…	AFG3 family protein [EC:3.4.24.-]	Peptidase M41
TRINITY_DN6821_c0_g1	FvH4_6g27790.1	16.683	7.037	-9.646	-2.37075	0.000994126	0.149104	RING finger protein 215 \\ 1.80E-40 \\ 93.59 % \\ GO:0046983-IEA \\ protein dimerization activity-IEA \\ GO:0046983 \\ protein dimerization activity		Zinc finger, RING-type
TRINITY_DN2150_c0_g3	FvH4_4g00360.1	9.9685	4.19925	-5.76925	-2.37388	9.20801e-06	0.0105454	---NA---		F-box domain
TRINITY_DN198714_c0_g1	FvH4_5g30940.1	4.5435	1.91325	-2.63025	-2.37475	0.0448136	0.929067	chlorophyll a-b binding protein CP24 10A, chloroplastic \\ 0.00E+00 \\ 88.57 % \\ GO:0004806-IEA;GO:0016787-IEA;GO:0016788-IEA \\ triglyceride lipase activity-IEA;hydrolase activity-IEA;hydrolase activity, acting on ester bonds-IEA \\ GO:0004806 \\ triglyceride lipase activity	light-harvesting complex II chlorophyll a/b binding protein 6	Chlorophyll A-B binding protein, plant
TRINITY_DN2185_c0_g2	FvH4_5g34640.1	7.25525	3.05475	-4.2005	-2.37507	0.000883631	0.138875	putative galactose oxidase, beta-propeller \\ 0.00E+00 \\ 85.37 % \\ GO:0102151-IEA;GO:0050410-IEA;GO:0016829-IEA;GO:0102577-IEA \\ 3-oxo-myristate decarboxylase activity-IEA;3-oxolaurate decarboxylase activity-IEA;lyase activity-IEA;3-oxo-palmitate decarboxylase activity-IEA \\ GO:0050410;GO:0102151;GO:0102577 \\ 3-oxolaurate decarboxylase activity;3-oxo-myristate decarboxylase activity;3-oxo-pa…		Protein of unknown function DUF1677, Oryza sativa
TRINITY_DN389_c2_g1	FvH4_5g17640.1	14.6755	6.173	-8.5025	-2.37737	7.5758e-05	0.0346272	i1 len=2175 path=[0:0-2174]
TRINITY_DN3268_c0_g1	FvH4_4g14820.1	5.81775	2.44525	-3.3725	-2.3792	0.000982731	0.147899	3-dehydrosphinganine reductase TSC10A-like isoform X1 \\ 0.00E+00 \\ 92.52 % \\ GO:0047560-IEA;GO:0016491-IEA;GO:0016020-IEA;GO:0016021-IEA;GO:0055114-IEA \\ 3-dehydrosphinganine reductase activity-IEA;oxidoreductase activity-IEA;membrane-IEA;integral component of membrane-IEA;oxidation-reduction process-IEA \\ GO:0016021;GO:0047560;GO:0055114 \\ integral component of membrane;3-dehydrosphinganin…	3-dehydrosphinganine reductase [EC:1.1.1.102]	Short-chain dehydrogenase/reductase SDR
TRINITY_DN5963_c0_g1	FvH4_4g04630.1	3.61275	1.5155	-2.09725	-2.38387	0.0109939	0.61816	PREDICTED: uncharacterized protein LOC101306220 isoform X1 \\ 0.00E+00 \\ 91.35 % \\ GO:0000166-IEA;GO:0005737-IEA;GO:0004812-IEA;GO:0106074-IEA;GO:0004826-IEA;GO:0002161-IEA;GO:0006432-IEA;GO:0043039-IEA;GO:0000049-IEA;GO:0016874-IEA;GO:0009328-IEA;GO:0005524-IEA \\ nucleotide binding-IEA;cytoplasm-IEA;aminoacyl-tRNA ligase activity-IEA;aminoacyl-tRNA metabolism involved in translational fidelit…
TRINITY_DN51915_c0_g2	FvH4_1g29160.1	3.23925	1.35825	-1.881	-2.38487	0.0028626	0.279874	---NA---		RNA polymerase sigma-70
TRINITY_DN10301_c0_g1	FvH4_6g18950.1	5.595	2.34075	-3.25425	-2.39026	0.0060146	0.432203	putative F-box/FBD/LRR-repeat protein At4g03220 isoform X1 \\ 4.60E-132 \\ 73.98 %		Leucine-rich repeat domain superfamily
TRINITY_DN4894_c0_g1	FvH4_4g06280.1	6.51425	2.72125	-3.793	-2.39384	5.92593e-05	0.0303371	F-box protein At5g07610-like \\ 0.00E+00 \\ 57.63 %		F-box domain
TRINITY_DN8884_c0_g1	FvH4_5g28210.1	12.0693	5.0335	-7.03575	-2.39778	0.00161807	0.199139	PREDICTED: uncharacterized protein LOC101306243 isoform X1 \\ 0.00E+00 \\ 90.01 % \\ GO:0016020-IEA;GO:0016021-IEA \\ membrane-IEA;integral component of membrane-IEA \\ GO:0016021 \\ integral component of membrane		Protein of unknown function DUF707
TRINITY_DN13960_c0_g1	FvH4_4g29850.1	20.5127	8.5535	-11.9592	-2.39817	4.7209e-06	0.00837656	putative methylesterase 11, chloroplastic		Alpha/beta hydrolase fold-1
TRINITY_DN10059_c0_g1	FvH4_6g35500.1	13.3145	5.54575	-7.76875	-2.40085	0.00057694	0.110548	GDSL esterase/lipase 1-like		GDSL lipase/esterase
TRINITY_DN5497_c0_g1	FvH4_2g05480.1	66.7602	27.7953	-38.965	-2.40186	0.000352258	0.0834412	leucine-rich repeat extensin-like protein 3 isoform X1 \\ 5.80E-94 \\ 89.92 % \\ GO:0016554-IEA \\ cytidine to uridine editing-IEA \\ GO:0016554 \\ cytidine to uridine editing		C2 domain
TRINITY_DN51091_c0_g2	FvH4_7g04950.1	1.47425	0.61325	-0.861	-2.404	0.025356	0.929067	---NA---		AP2/ERF domain
TRINITY_DN1414_c1_g2	FvH4_4g04860.1	2.126	0.88425	-1.24175	-2.4043	0.0155264	0.762752	putative EF-hand domain pair protein \\ 4.70E-135 \\ 75.91 % \\ GO:0003677-IEA;GO:0003700-IBA;GO:0046983-IEA;GO:0006355-IEA;GO:0044212-IBA;GO:0005634-IBA \\ DNA binding-IEA;DNA-binding transcription factor activity-IBA;protein dimerization activity-IEA;regulation of transcription, DNA-templated-IEA;transcription regulatory region DNA binding-IBA;nucleus-IBA \\ GO:0003700;GO:0005634;GO:0044212;GO:…		EF-hand domain
TRINITY_DN9757_c0_g1	FvH4_5g17790.1	2.83425	1.17875	-1.6555	-2.40445	0.0089362	0.547202	monoglyceride lipase \\ 1.00E-143 \\ 92.70 % \\ GO:0009507-IEA;GO:0047372-IEA;GO:0016020-IEA;GO:0016020-IBA;GO:0016021-IEA;GO:0016787-IEA \\ chloroplast-IEA;acylglycerol lipase activity-IEA;membrane-IEA;membrane-IBA;integral component of membrane-IEA;hydrolase activity-IEA \\ GO:0009507;GO:0016021;GO:0047372 \\ chloroplast;integral component of membrane;acylglycerol lipase activity	acylglycerol lipase [EC:3.1.1.23]	Serine aminopeptidase, S33
TRINITY_DN7654_c0_g1	FvH4_1g17460.1	23.9925	9.96975	-14.0228	-2.40653	0.0385021	0.929067	cytochrome P450 CYP82D47-like \\ 0.00E+00 \\ 81.20 % \\ GO:0005506-IEA;GO:0016491-IEA;GO:0046872-IEA;GO:0016705-IEA;GO:0016020-IEA;GO:0016021-IEA;GO:0020037-IEA;GO:0055114-IEA;GO:0004497-IEA \\ iron ion binding-IEA;oxidoreductase activity-IEA;metal ion binding-IEA;oxidoreductase activity, acting on paired donors, with incorporation or reduction of molecular oxygen-IEA;membrane-IEA;integral compon…		Cytochrome P450
TRINITY_DN5614_c0_g1	FvH4_7g24390.1	10.5377	4.37725	-6.1605	-2.40739	2.18207e-06	0.00560192	putative MENTAL domain-containing protein \\ 2.70E-99 \\ 87.74 % \\ GO:0016020-IEA;GO:0016021-IEA \\ membrane-IEA;integral component of membrane-IEA \\ GO:0016021 \\ integral component of membrane		MENTAL domain
TRINITY_DN108_c0_g3	FvH4_2g25230.1	12.8863	5.3425	-7.54375	-2.41203	0.00298225	0.286659	pentatricopeptide repeat-containing protein At5g56310-like \\ 0.00E+00 \\ 80.61 %		Pentatricopeptide repeat
TRINITY_DN573_c0_g1	FvH4_1g16070.1	5.642	2.33575	-3.30625	-2.4155	0.00697155	0.470992	SMI1/KNR4-like domain containing protein \\ 9.90E-170 \\ 93.52 %
TRINITY_DN10655_c0_g2	FvH4_2g08690.1	22.547	9.28525	-13.2617	-2.42826	0.0100291	0.58616	glucan endo-1,3-beta-glucosidase 7 \\ 0.00E+00 \\ 86.59 % \\ GO:0008152-IEA;GO:0042973-IEA;GO:0004553-IEA;GO:0005975-IEA;GO:0016787-IEA;GO:0016798-IEA \\ metabolic process-IEA;glucan endo-1,3-beta-D-glucosidase activity-IEA;hydrolase activity, hydrolyzing O-glycosyl compounds-IEA;carbohydrate metabolic process-IEA;hydrolase activity-IEA;hydrolase activity, acting on glycosyl bonds-IEA \\ GO:00059…		Glycoside hydrolase family 17
TRINITY_DN65809_c0_g1	FvH4_2g23100.1	40.852	16.8167	-24.0353	-2.42924	0.00221153	0.239055	sulfate transporter 3.1-like \\ 0.00E+00 \\ 94.45 % \\ GO:0015116-IEA;GO:0015116-IBA;GO:0008272-IEA;GO:0008271-IEA;GO:0055085-IEA;GO:0015301-IBA;GO:0009507-IEA;GO:0016020-IEA;GO:0016021-IEA;GO:0016021-IBA;GO:0098656-IEA;GO:1902358-IEA \\ sulfate transmembrane transporter activity-IEA;sulfate transmembrane transporter activity-IBA;sulfate transport-IEA;secondary active sulfate transmembrane transp…		SLC26A/SulP transporter
TRINITY_DN4831_c1_g1	FvH4_6g40530.1	2.99425	1.2325	-1.76175	-2.42941	0.000234332	0.0656747	putative SAWADEE domain-containing protein \\ 3.30E-153 \\ 67.63 % \\ GO:0003682-IEA \\ chromatin binding-IEA		SAWADEE domain
TRINITY_DN2634_c0_g1	FvH4_3g21580.1	12.5183	5.1475	-7.37075	-2.43191	0.000451805	0.096124	scarecrow-like protein 21 \\ 0.00E+00 \\ 87.29 %		Transcription factor GRAS
TRINITY_DN4573_c0_g1	FvH4_6g48210.1	7.0845	2.913	-4.1715	-2.43203	0.0180778	0.834843	expansin-A10-like isoform X1 \\ 0.00E+00 \\ 70.11 % \\ GO:0003723-IEA;GO:0046872-IEA;GO:0000502-IEA;GO:0003676-IEA \\ RNA binding-IEA;metal ion binding-IEA;proteasome complex-IEA;nucleic acid binding-IEA \\ GO:0003723;GO:0046872 \\ RNA binding;metal ion binding		Expansin
TRINITY_DN117_c0_g1	FvH4_4g26620.1	2.0385	0.83675	-1.20175	-2.43621	0.0029325	0.284159	uncharacterized protein LOC112199646 \\ 2.00E-31 \\ 87.04 % \\ GO:0080085-IEA;GO:0009507-IEA;GO:0045038-IEA;GO:0009416-IEA;GO:0016787-IEA \\ signal recognition particle, chloroplast targeting-IEA;chloroplast-IEA;protein import into chloroplast thylakoid membrane-IEA;response to light stimulus-IEA;hydrolase activity-IEA \\ GO:0009416;GO:0009507;GO:0016787;GO:0045038;GO:0080085 \\ response to light…
TRINITY_DN501_c0_g1	FvH4_5g07740.1	19.3655	7.94725	-11.4183	-2.43675	0.00145816	0.187251	cyclin-dependent kinase G-2-like \\ 0.00E+00 \\ 73.31 % \\ GO:0016020-IEA;GO:0016021-IEA;GO:0004672-IEA;GO:0016740-IEA;GO:0005524-IEA;GO:0006468-IEA \\ membrane-IEA;integral component of membrane-IEA;protein kinase activity-IEA;transferase activity-IEA;ATP binding-IEA;protein phosphorylation-IEA \\ GO:0004672;GO:0005524;GO:0006468;GO:0016021 \\ protein kinase activity;ATP binding;protein phosphor…	cell division cycle 2-like [EC:2.7.11.22]	Protein kinase domain
TRINITY_DN19557_c0_g2	FvH4_3g08880.1	4.73225	1.941	-2.79125	-2.43805	0.000457848	0.0969014	squamosa promoter-binding-like protein 3 \\ 2.40E-162 \\ 87.48 % \\ GO:0003743-IEA;GO:0000166-IEA;GO:0016702-IEA;GO:0055114-IEA;GO:0004386-IEA;GO:0004004-IEA;GO:0005524-IEA;GO:0016787-IEA;GO:0003676-IEA;GO:0006413-IEA \\ translation initiation factor activity-IEA;nucleotide binding-IEA;oxidoreductase activity, acting on single donors with incorporation of molecular oxygen, incorporation of two at…		SBP domain
TRINITY_DN9932_c0_g1	FvH4_3g08470.1	22.5622	9.25375	-13.3085	-2.43817	0.00061404	0.113751	glutaredoxin-C9-like \\ 0.00E+00 \\ 92.21 % \\ GO:0004348-IEA;GO:0006665-IEA;GO:0016787-IEA \\ glucosylceramidase activity-IEA;sphingolipid metabolic process-IEA;hydrolase activity-IEA \\ GO:0004348;GO:0006665 \\ glucosylceramidase activity;sphingolipid metabolic process		Glutaredoxin
TRINITY_DN796_c0_g2	FvH4_2g14260.1	8.03725	3.293	-4.74425	-2.44071	0.0182062	0.838383	U-box domain-containing protein 28-like \\ 0.00E+00 \\ 79.90 % \\ GO:0016746-IEA;GO:0016740-IEA;GO:0016874-IEA;GO:0016567-IEA;GO:0004842-IEA \\ transferase activity, transferring acyl groups-IEA;transferase activity-IEA;ligase activity-IEA;protein ubiquitination-IEA;ubiquitin-protein transferase activity-IEA \\ GO:0004842;GO:0016567;GO:0016746;GO:0016874 \\ ubiquitin-protein transferase activity;…		U box domain
TRINITY_DN262343_c0_g1	FvH4_1g13510.1	1.14175	0.46675	-0.675	-2.44617	0.0159251	0.773456	anti-muellerian hormone type-2 receptor
TRINITY_DN5897_c0_g1	FvH4_3g39780.1	11.2502	4.59325	-6.657	-2.4493	0.0320018	0.929067	PRA1 family protein B1-like \\ 9.20E-94 \\ 53.62 % \\ GO:0005506-IEA;GO:0055085-IEA;GO:0016705-IEA;GO:0016020-IEA;GO:0016021-IEA;GO:0020037-IEA;GO:0055114-IEA \\ iron ion binding-IEA;transmembrane transport-IEA;oxidoreductase activity, acting on paired donors, with incorporation or reduction of molecular oxygen-IEA;membrane-IEA;integral component of membrane-IEA;heme binding-IEA;oxidation-reducti…	PRA1 family protein 1	Prenylated rab acceptor PRA1
TRINITY_DN6962_c0_g1	FvH4_3g04020.1	15.5497	6.342	-9.20775	-2.45187	0.00397482	0.34024	F-box protein At1g61340-like \\ 5.50E-31 \\ 69.17 % \\ GO:0016020-IEA;GO:0016021-IEA \\ membrane-IEA;integral component of membrane-IEA \\ GO:0016020 \\ membrane		F-box domain
TRINITY_DN6010_c0_g1	FvH4_5g36280.1	25.4292	10.349	-15.0802	-2.45717	0.000461623	0.0969014	PREDICTED: uncharacterized protein LOC101306919 \\ 5.90E-18 \\ 82.60 %
TRINITY_DN841_c0_g1	FvH4_1g13660.1	19.1485	7.787	-11.3615	-2.45903	4.1053e-07	0.00288883	UPF0496 protein At4g34320-like \\ 0.00E+00 \\ 80.60 % \\ GO:0016020-IEA;GO:0016021-IEA \\ membrane-IEA;integral component of membrane-IEA \\ GO:0016021 \\ integral component of membrane		IQ motif, EF-hand binding site
TRINITY_DN5023_c0_g1	FvH4_5g01350.1	467.121	189.785	-277.337	-2.46132	0.000785994	0.129855	hydroxymethylglutaryl-CoA synthase \\ 1.30E-135 \\ 99.26 % \\ GO:0016746-IEA;GO:0008299-IEA;GO:0003824-IEA;GO:0006629-IEA;GO:0008202-IEA;GO:0006694-IEA;GO:0016740-IEA;GO:0004421-IEA;GO:0016126-IEA \\ transferase activity, transferring acyl groups-IEA;isoprenoid biosynthetic process-IEA;catalytic activity-IEA;lipid metabolic process-IEA;steroid metabolic process-IEA;steroid biosynthetic process-IE…	hydroxymethylglutaryl-CoA synthase [EC:2.3.3.10]	Hydroxymethylglutaryl-coenzyme A synthase, active site
TRINITY_DN1470_c0_g2	FvH4_1g19380.1	106.02	43.0512	-62.9685	-2.46264	0.000774456	0.12848	putative UDP-rhamnose:rhamnosyltransferase 1 \\ 0.00E+00 \\ 85.48 % \\ GO:0016757-IEA;GO:0016758-IEA;GO:0016020-IEA;GO:0016021-IEA;GO:0016740-IEA \\ transferase activity, transferring glycosyl groups-IEA;transferase activity, transferring hexosyl groups-IEA;membrane-IEA;integral component of membrane-IEA;transferase activity-IEA \\ GO:0016021;GO:0016758 \\ integral component of membrane;transfera…		UDP-glucuronosyl/UDP-glucosyltransferase
TRINITY_DN1589_c0_g1	FvH4_1g16870.1	8.90675	3.61225	-5.2945	-2.46571	9.50613e-05	0.03949	cytochrome P450 81E8-like \\ 0.00E+00 \\ 86.51 % \\ GO:0005506-IEA;GO:0016491-IEA;GO:0016705-IEA;GO:0046872-IEA;GO:0016020-IEA;GO:0016021-IEA;GO:0020037-IEA;GO:0055114-IEA;GO:0004497-IEA \\ iron ion binding-IEA;oxidoreductase activity-IEA;oxidoreductase activity, acting on paired donors, with incorporation or reduction of molecular oxygen-IEA;metal ion binding-IEA;membrane-IEA;integral component …		Cytochrome P450
TRINITY_DN3759_c0_g1	FvH4_6g50750.1	9.25975	3.75475	-5.505	-2.46614	0.000942939	0.144093	L-aspartate oxidase, chloroplastic \\ 0.00E+00 \\ 92.21 % \\ GO:0005737-IEA;GO:0009507-IEA;GO:0016491-IEA;GO:0019363-IEA;GO:0009435-IEA;GO:0055114-IEA;GO:0008734-IEA;GO:0044318-IEA \\ cytoplasm-IEA;chloroplast-IEA;oxidoreductase activity-IEA;pyridine nucleotide biosynthetic process-IEA;NAD biosynthetic process-IEA;oxidation-reduction process-IEA;L-aspartate oxidase activity-IEA;L-aspartate:fumara…	L-aspartate oxidase [EC:1.4.3.16]	FAD-dependent oxidoreductase 2, FAD binding domain
TRINITY_DN2771_c0_g1	FvH4_2g12540.1	39.0513	15.834	-23.2173	-2.46629	3.31125e-05	0.0217969	LEAF RUST 10 DISEASE-RESISTANCE LOCUS RECEPTOR-LIKE PROTEIN KINASE-like 1.4 \\ 0.00E+00 \\ 80.02 % \\ GO:0016020-IEA;GO:0016021-IEA;GO:0016740-IEA;GO:0004672-IEA;GO:0030247-IEA;GO:0005524-IEA;GO:0006468-IEA \\ membrane-IEA;integral component of membrane-IEA;transferase activity-IEA;protein kinase activity-IEA;polysaccharide binding-IEA;ATP binding-IEA;protein phosphorylation-IEA \\ GO:0005488;GO:…		Protein kinase domain
TRINITY_DN5973_c0_g1	FvH4_6g32130.1	1.51275	0.613	-0.89975	-2.46778	0.0127404	0.676546	ankyrin repeat-containing protein At2g01680-like \\ 0.00E+00 \\ 65.33 % \\ GO:0016020-IEA;GO:0016021-IEA \\ membrane-IEA;integral component of membrane-IEA \\ GO:0016021 \\ integral component of membrane		Ankyrin repeat
TRINITY_DN8431_c0_g1	FvH4_5g38810.1	30.4198	12.3015	-18.1182	-2.47285	0.000696638	0.120993	beta-1,3-galactosyltransferase 7 isoform X2 \\ 0.00E+00 \\ 92.10 % \\ GO:0016757-IEA;GO:0016020-IEA;GO:0016021-IEA;GO:0008378-IEA;GO:0006486-IEA;GO:0016740-IEA;GO:0005794-IEA;GO:0000139-IEA \\ transferase activity, transferring glycosyl groups-IEA;membrane-IEA;integral component of membrane-IEA;galactosyltransferase activity-IEA;protein glycosylation-IEA;transferase activity-IEA;Golgi apparatus-I…	beta-1,3-galactosyltransferase 1/2/3/4/5/7/8 [EC:2.4.1.-]	Glycosyl transferase, family 31
TRINITY_DN2621_c0_g1	FvH4_6g02980.1	131.178	53.0415	-78.137	-2.47313	0.0141403	0.721105	---NA---	GDP-D-mannose 3', 5'-epimerase [EC:5.1.3.18 5.1.3.-]	NAD-dependent epimerase/dehydratase
TRINITY_DN5569_c0_g1	FvH4_2g03450.1	2.62825	1.06125	-1.567	-2.47656	0.0174015	0.815466	PREDICTED: uncharacterized protein LOC101305138 \\ 0.00E+00 \\ 88.57 % \\ GO:0003964-IEA;GO:0016779-IEA;GO:0008270-IEA;GO:0006278-IEA;GO:0015074-IEA;GO:0000943-IEA;GO:0016740-IEA;GO:0003676-IEA \\ RNA-directed DNA polymerase activity-IEA;nucleotidyltransferase activity-IEA;zinc ion binding-IEA;RNA-dependent DNA biosynthetic process-IEA;DNA integration-IEA;retrotransposon nucleocapsid-IEA;transfer…
TRINITY_DN11417_c0_g1	FvH4_6g08500.1	10.7107	4.31175	-6.399	-2.48408	0.0274564	0.929067	aspartic proteinase-like \\ 0.00E+00 \\ 88.03 % \\ GO:0004190-IEA;GO:0008233-IEA;GO:0006629-IEA;GO:0006508-IEA;GO:0016020-IEA;GO:0016021-IEA;GO:0016787-IEA \\ aspartic-type endopeptidase activity-IEA;peptidase activity-IEA;lipid metabolic process-IEA;proteolysis-IEA;membrane-IEA;integral component of membrane-IEA;hydrolase activity-IEA \\ GO:0004190;GO:0006508;GO:0006629;GO:0016021 \\ aspartic-ty…	phytepsin [EC:3.4.23.40]	Aspartic peptidase A1 family
TRINITY_DN1154_c0_g2	FvH4_5g34840.1	6.7615	2.7205	-4.041	-2.48539	0.00649041	0.453724	protein ECERIFERUM 2-like \\ 1.30E-173 \\ 64.29 % \\ GO:0003677-IEA \\ DNA binding-IEA		Transferase
TRINITY_DN71_c0_g1	FvH4_5g10730.1	7.97225	3.2	-4.77225	-2.49133	0.0127217	0.676069	TMV resistance protein N-like \\ 6.80E-14 \\ 46.98 % \\ GO:0016020-IEA;GO:0016021-IEA \\ membrane-IEA;integral component of membrane-IEA		Toll/interleukin-1 receptor homology (TIR) domain
TRINITY_DN10563_c1_g2	FvH4_5g16890.1	35.6992	14.293	-21.4062	-2.49767	6.82469e-06	0.00939104	protein DETOXIFICATION 16-like \\ 0.00E+00 \\ 85.87 % \\ GO:0055085-IEA;GO:0009507-IEA;GO:0016020-IEA;GO:0015297-IEA;GO:0016021-IEA;GO:0006855-IEA;GO:0015238-IEA;GO:0009536-IEA \\ transmembrane transport-IEA;chloroplast-IEA;membrane-IEA;antiporter activity-IEA;integral component of membrane-IEA;drug transmembrane transport-IEA;drug transmembrane transporter activity-IEA;plastid-IEA \\ GO:0006855;…		Multi antimicrobial extrusion protein
TRINITY_DN44649_c0_g1	FvH4_3g19340.1	2.594	1.038	-1.556	-2.49904	0.00198882	0.223042	probable aminotransferase TAT2 \\ 0.00E+00 \\ 93.14 % \\ GO:0080130-IEA;GO:0030170-IEA;GO:0003824-IEA;GO:0009058-IEA;GO:0008793-IEA;GO:0008483-IEA;GO:0006520-IEA;GO:0016740-IEA \\ L-phenylalanine:2-oxoglutarate aminotransferase activity-IEA;pyridoxal phosphate binding-IEA;catalytic activity-IEA;biosynthetic process-IEA;aromatic-amino-acid:2-oxoglutarate aminotransferase activity-IEA;transaminase …	tyrosine aminotransferase [EC:2.6.1.5]	Aminotransferase, class I/classII
TRINITY_DN262292_c0_g1	FvH4_2g04290.1	49.7572	19.885	-29.8722	-2.50225	0.000855153	0.136643	probable beta-D-xylosidase 5 isoform X2 \\ 2.60E-05 \\ 98.34 %
TRINITY_DN1298_c5_g1	FvH4_3g20150.1	2.7705	1.1065	-1.664	-2.50384	0.0325698	0.929067	---NA---
TRINITY_DN16815_c0_g1	FvH4_5g28820.1	12.9573	5.16475	-7.7925	-2.50879	0.041975	0.929067	ferredoxin, leaf L-A-like		2Fe-2S ferredoxin-type iron-sulfur binding domain
TRINITY_DN10598_c0_g1	FvH4_1g17530.1	1.57875	0.627	-0.95175	-2.51794	0.0137875	0.711834	cyclin-D5-1 \\ 0.00E+00 \\ 78.04 % \\ GO:0005634-IEA \\ nucleus-IEA \\ GO:0005634 \\ nucleus		Cyclin, N-terminal
TRINITY_DN3663_c1_g1	FvH4_2g26820.1	11.8968	4.72325	-7.1735	-2.51876	0.000658236	0.117013	sister chromatid cohesion protein PDS5 homolog A isoform X1 \\ 0.00E+00 \\ 82.92 %		Armadillo-like helical
TRINITY_DN6944_c0_g2	FvH4_7g10070.1	4.572	1.8135	-2.7585	-2.52109	0.00130112	0.174808	ethylene-responsive transcription factor 2-like \\ 8.80E-22 \\ 74.99 % \\ GO:0046872-IEA \\ metal ion binding-IEA \\ GO:0046872 \\ metal ion binding		AP2/ERF domain
TRINITY_DN2875_c0_g1	FvH4_1g15580.1	2.88575	1.14275	-1.743	-2.52527	0.00209311	0.230896	patatin-like protein 2 \\ 0.00E+00 \\ 91.23 % \\ GO:0003755-IEA;GO:0006629-IEA;GO:0016042-IEA;GO:0000413-IEA;GO:0016787-IEA;GO:0016853-IEA;GO:0006457-IEA \\ peptidyl-prolyl cis-trans isomerase activity-IEA;lipid metabolic process-IEA;lipid catabolic process-IEA;protein peptidyl-prolyl isomerization-IEA;hydrolase activity-IEA;isomerase activity-IEA;protein folding-IEA \\ GO:0000413;GO:0003755;GO:0…		Patatin-like phospholipase domain
TRINITY_DN6167_c0_g1	FvH4_2g41060.1	13.4108	5.31025	-8.1005	-2.52545	0.00379373	0.330618	probable WRKY transcription factor 40 isoform X1 \\ 0.00E+00 \\ 66.88 % \\ GO:0003677-IEA;GO:0003700-IEA;GO:0006355-IEA;GO:0043565-IEA;GO:0005634-IEA \\ DNA binding-IEA;DNA-binding transcription factor activity-IEA;regulation of transcription, DNA-templated-IEA;sequence-specific DNA binding-IEA;nucleus-IEA \\ GO:0003700;GO:0005634;GO:0006355;GO:0043565 \\ DNA-binding transcription factor activity…		WRKY domain
TRINITY_DN939_c0_g2	FvH4_2g25030.1	5.005	1.98125	-3.02375	-2.52618	0.00124699	0.17065	spermatogenesis-associated protein 20 \\ 0.00E+00 \\ 89.11 % \\ GO:0003824-IEA \\ catalytic activity-IEA \\ GO:0003824 \\ catalytic activity		Domain of unknown function DUF255
TRINITY_DN928_c2_g1	FvH4_3g23100.1	1.49075	0.58925	-0.9015	-2.52991	0.00596427	0.429782	L-type lectin-domain containing receptor kinase IX.1-like \\ 0.00E+00 \\ 81.14 % \\ GO:0016020-IEA;GO:0016021-IEA;GO:0016740-IEA;GO:0004672-IEA;GO:0030246-IEA;GO:0005524-IEA;GO:0006468-IEA \\ membrane-IEA;integral component of membrane-IEA;transferase activity-IEA;protein kinase activity-IEA;carbohydrate binding-IEA;ATP binding-IEA;protein phosphorylation-IEA \\ GO:0004672;GO:0005524;GO:0006468;G…		Protein kinase domain
TRINITY_DN1990_c1_g4	FvH4_5g03140.1	18.041	7.131	-10.91	-2.52994	8.76553e-06	0.0103069	heavy metal-associated isoprenylated plant protein 39		Heavy metal-associated domain, HMA
TRINITY_DN5792_c0_g1	FvH4_6g53130.1	6.6375	2.6165	-4.021	-2.53679	0.00114916	0.162246	probable adenylate kinase 7, mitochondrial \\ 1.10E-120 \\ 74.63 % \\ GO:0003676-IEA \\ nucleic acid binding-IEA \\ GO:0003676 \\ nucleic acid binding	adenylate kinase [EC:2.7.4.3]	Adenylate kinase/UMP-CMP kinase
TRINITY_DN24123_c0_g2	FvH4_7g14710.1	100.525	39.6175	-60.9078	-2.5374	0.0025069	0.258622	L-3-cyanoalanine synthase 2, mitochondrial \\ 4.00E-180 \\ 89.19 % \\ GO:0005739-IEA;GO:0016829-IEA;GO:0019499-IEA;GO:0019344-IEA;GO:0009611-IDA;GO:0008652-IEA;GO:0016740-IEA;GO:0006535-IEA;GO:0009836-IDA;GO:0004124-IEA;GO:0050017-IEA;GO:0050017-IDA \\ mitochondrion-IEA;lyase activity-IEA;cyanide metabolic process-IEA;cysteine biosynthetic process-IEA;response to wounding-IDA;cellular amino acid …	L-3-cyanoalanine synthase/ cysteine synthase [EC:2.5.1.47 4.4.1.9]	Cysteine synthase/cystathionine beta-synthase, pyridoxal-phosphate attachment site
TRINITY_DN12014_c1_g1	FvH4_6g37490.1	20.8077	8.19975	-12.608	-2.53761	0.00779299	0.504747	mitogen-activated protein kinase kinase 5-like \\ 0.00E+00 \\ 92.84 % \\ GO:0005515-IPI;GO:0000166-IEA;GO:0023014-IBA;GO:0005737-IBA;GO:0000165-IEA;GO:0000187-IBA;GO:0032147-IBA;GO:0004708-IBA;GO:0016310-IEA;GO:0016740-IEA;GO:0016301-IEA;GO:0031098-IBA;GO:0004672-IEA;GO:0004674-IEA;GO:0004674-IBA;GO:0005524-IEA;GO:0006468-IEA \\ protein binding-IPI;nucleotide binding-IEA;signal transduction by pr…	mitogen-activated protein kinase kinase 4/5 [EC:2.7.12.2]	Protein kinase domain
TRINITY_DN3119_c0_g1	FvH4_6g17290.1	8.5455	3.36525	-5.18025	-2.53934	0.0028241	0.278095	aspartic proteinase-like protein 2 \\ 8.20E-155 \\ 92.65 % \\ GO:0004190-IEA;GO:0008233-IEA;GO:0006508-IEA;GO:0016020-IEA;GO:0016021-IEA;GO:0016787-IEA \\ aspartic-type endopeptidase activity-IEA;peptidase activity-IEA;proteolysis-IEA;membrane-IEA;integral component of membrane-IEA;hydrolase activity-IEA \\ GO:0004190;GO:0006508;GO:0016021 \\ aspartic-type endopeptidase activity;proteolysis;integ…		Aspartic peptidase A1 family
TRINITY_DN291562_c0_g1	FvH4_2g04120.1	9.3985	3.69875	-5.69975	-2.54099	0.040412	0.929067	zinc finger protein ZAT10-like		Zinc finger C2H2-type
TRINITY_DN7347_c0_g1	FvH4_1g01560.1	1.4185	0.556	-0.8625	-2.55126	0.00693197	0.469809	---NA---		Sugar/inositol transporter
TRINITY_DN8829_c0_g1	FvH4_1g20190.1	4.33075	1.69525	-2.6355	-2.55464	0.000326783	0.0798725	PREDICTED: uncharacterized protein LOC101308800 \\ 0.00E+00 \\ 78.46 % \\ GO:0016020-IEA;GO:0016021-IEA;GO:0016310-IEA;GO:0016301-IEA \\ membrane-IEA;integral component of membrane-IEA;phosphorylation-IEA;kinase activity-IEA
TRINITY_DN21328_c0_g1	FvH4_5g24040.1	4.559	1.78375	-2.77525	-2.55585	0.00433804	0.357906	Tumor necrosis factor alpha-induced protein like \\ 0.00E+00 \\ 97.11 % \\ GO:0051028-IEA;GO:0000166-IEA;GO:0003723-IEA;GO:0016787-IEA;GO:0008150-ND;GO:0008380-IEA;GO:0005681-IEA;GO:0006397-IEA;GO:0005575-ND;GO:0004386-IEA;GO:0005524-IEA;GO:0005634-IEA;GO:0003676-IEA \\ mRNA transport-IEA;nucleotide binding-IEA;RNA binding-IEA;hydrolase activity-IEA;biological_process-ND;RNA splicing-IEA;spliceos…	large subunit ribosomal protein L40e
TRINITY_DN9579_c0_g2	FvH4_1g04860.1	3.0585	1.1935	-1.865	-2.56263	0.00211909	0.232323	PREDICTED: uncharacterized protein LOC101308222 \\ 1.90E-49 \\ 56.87 %
TRINITY_DN2284_c0_g1	FvH4_1g15390.1	9.16125	3.57475	-5.5865	-2.56277	0.0156297	0.765145	probable disease resistance protein At5g66900 \\ 0.00E+00 \\ 69.42 % \\ GO:0043531-IEA \\ ADP binding-IEA		NB-ARC
TRINITY_DN6668_c0_g1	FvH4_5g26750.1	9.08425	3.54225	-5.542	-2.56454	0.00259951	0.264301	---NA---		Cyanobacterial aminoacyl-tRNA synthetase, CAAD domain
TRINITY_DN2305_c0_g1	FvH4_6g09640.1	9.09325	3.54525	-5.548	-2.56491	0.000103639	0.0420108	serine/threonine-protein kinase AtPK2/AtPK19-like \\ 0.00E+00 \\ 83.84 % \\ GO:0000166-IEA;GO:0005737-IBA;GO:0016020-IEA;GO:0016021-IEA;GO:0016310-IEA;GO:0016740-IEA;GO:0016301-IEA;GO:0035556-IBA;GO:0004672-IEA;GO:0004674-IEA;GO:0004674-IBA;GO:0005524-IEA;GO:0005634-IBA;GO:0006468-IEA;GO:0006468-IBA \\ nucleotide binding-IEA;cytoplasm-IBA;membrane-IEA;integral component of membrane-IEA;phosphoryl…	ribosomal protein S6 kinase beta [EC:2.7.11.1]	Protein kinase domain
TRINITY_DN8084_c0_g3	FvH4_7g22760.1	2.039	0.79475	-1.24425	-2.56559	0.0220569	0.929067	hypothetical protein CCACVL1_09133 \\ 0.00E+00 \\ 94.11 % \\ GO:0016020-IEA;GO:0016021-IEA \\ membrane-IEA;integral component of membrane-IEA \\ GO:0016021 \\ integral component of membrane
TRINITY_DN2403_c3_g1	FvH4_6g43420.1	2.67325	1.04125	-1.632	-2.56735	0.0230799	0.929067	---NA---
TRINITY_DN9365_c0_g1	FvH4_5g02710.1	24.2397	9.4025	-14.8372	-2.57801	0.0030294	0.289295	BTB/POZ domain-containing protein At5g41330 \\ 0.00E+00 \\ 99.03 % \\ GO:0003743-IEA;GO:0000166-IEA;GO:0003723-IEA;GO:0005737-IEA;GO:0004386-IEA;GO:0004004-IEA;GO:0005524-IEA;GO:0016787-IEA;GO:0006412-IEA;GO:0003676-IEA;GO:0006413-IEA \\ translation initiation factor activity-IEA;nucleotide binding-IEA;RNA binding-IEA;cytoplasm-IEA;helicase activity-IEA;ATP-dependent RNA helicase activity-IEA;ATP…		BTB/POZ domain
TRINITY_DN6776_c0_g1	FvH4_2g25570.1	11.0395	4.28075	-6.75875	-2.57887	0.000150587	0.0513748	ABC transporter C family member 14-like \\ 0.00E+00 \\ 90.87 % \\ GO:0042626-IEA;GO:0000166-IEA;GO:0055085-IEA;GO:0016020-IEA;GO:0016021-IEA;GO:0005524-IEA;GO:0016887-IEA \\ ATPase activity, coupled to transmembrane movement of substances-IEA;nucleotide binding-IEA;transmembrane transport-IEA;membrane-IEA;integral component of membrane-IEA;ATP binding-IEA;ATPase activity-IEA \\ GO:0005524;GO:0016…		ABC transporter-like
TRINITY_DN260647_c0_g1	FvH4_5g23520.1	1.43	0.55425	-0.87575	-2.58006	0.00169057	0.203524	phosphoribulokinase, chloroplastic \\ 8.10E-66 \\ 98.10 % \\ GO:0005388-IEA;GO:0070588-IEA;GO:0016787-IEA;GO:0005854-IEA;GO:0099132-IEA \\ calcium-transporting ATPase activity-IEA;calcium ion transmembrane transport-IEA;hydrolase activity-IEA;nascent polypeptide-associated complex-IEA;ATP hydrolysis coupled cation transmembrane transport-IEA \\ GO:0005388;GO:0005854;GO:0070588;GO:0099132 \\ calci…	phosphoribulokinase [EC:2.7.1.19]	Phosphoribulokinase
TRINITY_DN24013_c0_g1	FvH4_6g44340.1	2.044	0.7915	-1.2525	-2.58244	0.0295506	0.929067	myb-related protein Myb4-like \\ 2.20E-150 \\ 80.78 % \\ GO:0043531-IEA;GO:0016787-IEA \\ ADP binding-IEA;hydrolase activity-IEA \\ GO:0016787;GO:0043531 \\ hydrolase activity;ADP binding	transcription factor MYB, plant	SANT/Myb domain
TRINITY_DN10829_c0_g1	FvH4_4g04740.1	8.3635	3.22525	-5.13825	-2.59313	0.0452592	0.929067	putative EF-hand domain pair protein \\ 8.50E-60 \\ 86.89 % \\ GO:0005504-IEA;GO:0009627-IEA \\ fatty acid binding-IEA;systemic acquired resistance-IEA \\ GO:0005504;GO:0009627 \\ fatty acid binding;systemic acquired resistance		EF-hand domain
TRINITY_DN4645_c0_g1	FvH4_6g53780.1	2.99475	1.1545	-1.84025	-2.59398	0.0174558	0.816303	short-chain dehydrogenase reductase 2a \\ 0.00E+00 \\ 66.98 % \\ GO:0003677-IEA \\ DNA binding-IEA \\ GO:0003677 \\ DNA binding		Short-chain dehydrogenase/reductase SDR
TRINITY_DN1574_c0_g1	FvH4_3g20140.1	20.9055	8.04125	-12.8643	-2.59978	0.00393282	0.337686	thioredoxin M4, chloroplastic \\ 0.00E+00 \\ 80.50 % \\ GO:0016746-IEA;GO:0102406-IEA;GO:0016747-IEA;GO:0016740-IEA;GO:0047172-IEA \\ transferase activity, transferring acyl groups-IEA;omega-hydroxypalmitate O-sinapoyl transferase activity-IEA;transferase activity, transferring acyl groups other than amino-acyl groups-IEA;transferase activity-IEA;shikimate O-hydroxycinnamoyltransferase activity-I…		Thioredoxin
TRINITY_DN3330_c0_g1	FvH4_3g36330.1	1.64575	0.63225	-1.0135	-2.60301	0.0355009	0.929067	testis-specific gene 10 protein-like isoform X1 \\ 0.00E+00 \\ 62.31 %
TRINITY_DN12348_c0_g1	FvH4_2g20480.1	1.68275	0.64575	-1.037	-2.60588	1.55131e-05	0.0141285	bifunctional TH2 protein, mitochondrial-like \\ 0.00E+00 \\ 76.92 % \\ GO:0016787-IEA \\ hydrolase activity-IEA		Thiaminase-2/PQQC
TRINITY_DN651_c0_g1	FvH4_3g03960.1	67.8717	26.026	-41.8457	-2.60784	2.27436e-05	0.0174243	external alternative NAD(P)H-ubiquinone oxidoreductase B2, mitochondrial \\ 0.00E+00 \\ 87.24 % \\ GO:0016491-IEA;GO:0016020-IEA;GO:0005509-IEA;GO:0016021-IEA;GO:0055114-IEA \\ oxidoreductase activity-IEA;membrane-IEA;calcium ion binding-IEA;integral component of membrane-IEA;oxidation-reduction process-IEA \\ GO:0005509;GO:0016021;GO:0016491;GO:0055114 \\ calcium ion binding;integral component o…	NADH:ubiquinone reductase (non-electrogenic) [EC:1.6.5.9]	EF-hand domain
TRINITY_DN6802_c0_g1	FvH4_2g25860.1	1077.44	412.327	-665.113	-2.61307	0.00698697	0.471621	indole-3-acetic acid-induced protein ARG2		Late embryogenesis abundant protein, LEA5-type
TRINITY_DN11679_c0_g1	FvH4_4g26720.1	7.039	2.68875	-4.35025	-2.61795	5.07613e-06	0.00863895	putative rossmann-like alpha/beta/alpha sandwich protein \\ 1.40E-162 \\ 91.66 % \\ GO:0009058-IEA;GO:0003824-IEA \\ biosynthetic process-IEA;catalytic activity-IEA \\ GO:0003824;GO:0009058 \\ catalytic activity;biosynthetic process		Cytidyltransferase-like domain
TRINITY_DN5005_c0_g1	FvH4_4g26570.1	87.0735	33.2518	-53.8217	-2.61861	0.00389953	0.335942	amino-acid permease BAT1 isoform X1 \\ 0.00E+00 \\ 92.96 % \\ GO:0055085-IEA;GO:0016020-IEA;GO:0016021-IEA;GO:0022857-IEA;GO:0006865-IEA \\ transmembrane transport-IEA;membrane-IEA;integral component of membrane-IEA;transmembrane transporter activity-IEA;amino acid transport-IEA \\ GO:0006865;GO:0016021;GO:0022857;GO:0055085 \\ amino acid transport;integral component of membrane;transmembrane tra…
TRINITY_DN5561_c0_g1	FvH4_1g17220.1	12.5915	4.80475	-7.78675	-2.62064	0.000179551	0.0566746	molybdate-anion transporter \\ 0.00E+00 \\ 80.99 % \\ GO:0016020-IEA;GO:0016021-IEA;GO:0015098-IEA;GO:0015689-IEA \\ membrane-IEA;integral component of membrane-IEA;molybdate ion transmembrane transporter activity-IEA;molybdate ion transport-IEA \\ GO:0015098;GO:0015689;GO:0016021 \\ molybdate ion transmembrane transporter activity;molybdate ion transport;integral component of membrane		Molybdate-anion transporter
TRINITY_DN1498_c2_g1	FvH4_1g23740.1	24.6275	9.3975	-15.23	-2.62064	0.00059931	0.112237	FAD-dependent urate hydroxylase-like \\ 9.10E-42 \\ 70.18 % \\ GO:0031047-IEA;GO:0003676-IEA \\ gene silencing by RNA-IEA;nucleic acid binding-IEA		FAD-binding domain
TRINITY_DN12723_c0_g1	FvH4_4g36960.1	15.0475	5.728	-9.3195	-2.62701	0.00543834	0.407935	endochitinase A \\ 8.20E-49 \\ 85.38 % \\ GO:0016020-IEA;GO:0016021-IEA;GO:0005886-IEA \\ membrane-IEA;integral component of membrane-IEA;plasma membrane-IEA \\ GO:0005886;GO:0016021 \\ plasma membrane;integral component of membrane
TRINITY_DN3166_c0_g1	FvH4_1g00120.1	6.0145	2.288	-3.7265	-2.62872	0.00199664	0.223612	poly(ADP-ribose) glycohydrolase 1-like \\ 0.00E+00 \\ 85.63 % \\ GO:0008152-IEA;GO:0006282-IBA;GO:0005737-IBA;GO:0004649-IEA;GO:0004649-IBA;GO:1990966-IBA;GO:0009225-IBA;GO:0005975-IEA;GO:0005634-IBA;GO:0016798-IEA;GO:0016787-IEA \\ metabolic process-IEA;regulation of DNA repair-IBA;cytoplasm-IBA;poly(ADP-ribose) glycohydrolase activity-IEA;poly(ADP-ribose) glycohydrolase activity-IBA;ATP generat…	poly(ADP-ribose) glycohydrolase [EC:3.2.1.143]	Poly(ADP-ribose) glycohydrolase
TRINITY_DN18847_c1_g2	FvH4_3g26780.1	7.22725	2.7365	-4.49075	-2.64106	0.00970761	0.57457	PREDICTED: uncharacterized protein LOC105350703 \\ 2.00E-85 \\ 77.95 % \\ GO:0016020-IEA;GO:0016021-IEA;GO:0005509-IEA;GO:0016310-IEA;GO:0004672-IEA;GO:0016740-IEA;GO:0030247-IEA;GO:0016301-IEA;GO:0004674-IEA;GO:0005524-IEA;GO:0006468-IEA \\ membrane-IEA;integral component of membrane-IEA;calcium ion binding-IEA;phosphorylation-IEA;protein kinase activity-IEA;transferase activity-IEA;polysacchari…
TRINITY_DN6553_c0_g1	FvH4_6g05190.1	5.2625	1.991	-3.2715	-2.64314	0.000543481	0.106711	protein DMP10-like \\ 6.90E-132 \\ 80.89 % \\ GO:0016020-IEA;GO:0016021-IEA \\ membrane-IEA;integral component of membrane-IEA \\ GO:0016021 \\ integral component of membrane		Protein DMP
TRINITY_DN9512_c0_g1	FvH4_5g11530.1	18.4043	6.9465	-11.4578	-2.64943	0.0141053	0.720275	hypothetical protein Pyn_38651 \\ 4.20E-15 \\ 69.68 %
TRINITY_DN7408_c0_g1	FvH4_3g33900.1	80.2552	30.2847	-49.9705	-2.65002	4.59852e-06	0.00823644	mitogen-activated protein kinase 3 \\ 0.00E+00 \\ 98.19 % \\ GO:0000166-IEA;GO:0009409-IEA;GO:0000165-IEA;GO:0005737-IEA;GO:0005737-IBA;GO:0004707-IEA;GO:0010468-IBA;GO:0016310-IEA;GO:0016740-IEA;GO:0016301-IEA;GO:0035556-IBA;GO:0050832-IEA;GO:1901002-IEA;GO:0009414-IEA;GO:0004672-IEA;GO:0042742-IEA;GO:0004674-IEA;GO:0005524-IEA;GO:0005634-IEA;GO:0005634-IBA;GO:0006468-IEA;GO:0005622-IEA \\ nucle…	mitogen-activated protein kinase 3 [EC:2.7.11.24]	Protein kinase domain
TRINITY_DN5357_c0_g1	FvH4_3g12850.1	9.83275	3.70525	-6.1275	-2.65373	0.00681194	0.465057	allantoate deiminase \\ 0.00E+00 \\ 90.16 % \\ GO:0016813-IEA;GO:0047652-IEA;GO:0005783-IEA;GO:0006145-IEA;GO:0016787-IEA;GO:0010136-IEA \\ hydrolase activity, acting on carbon-nitrogen (but not peptide) bonds, in linear amidines-IEA;allantoate deiminase activity-IEA;endoplasmic reticulum-IEA;purine nucleobase catabolic process-IEA;hydrolase activity-IEA;ureide catabolic process-IEA \\ GO:0005783…	allantoate deiminase [EC:3.5.3.9]	Peptidase M20
TRINITY_DN15162_c0_g2	FvH4_2g16170.1	14.7525	5.55825	-9.19425	-2.65416	0.000569922	0.109941	putative transcription factor C2H2 family \\ 0.00E+00 \\ 93.75 % \\ GO:0044183-IBA;GO:0000166-IEA;GO:0051787-IBA;GO:0005737-IBA;GO:0005739-IBA;GO:0034620-IBA;GO:0034605-IBA;GO:0016887-IBA;GO:0031072-IBA;GO:0051085-IBA;GO:0042026-IBA;GO:0006986-IBA;GO:0051082-IEA;GO:0051082-IBA;GO:0005524-IEA;GO:0005524-IBA;GO:0042623-IBA;GO:0006457-IEA \\ protein binding involved in protein folding-IBA;nucleotide…		Zinc finger, RING-type
TRINITY_DN18275_c0_g1	FvH4_3g38530.1	27.9532	10.5297	-17.4235	-2.65469	0.00170383	0.204799	vacuolar cation/proton exchanger 3-like \\ 0.00E+00 \\ 89.85 % \\ GO:0006812-IEA;GO:0009705-IBA;GO:0016020-IEA;GO:0006816-IEA;GO:0016021-IEA;GO:0070588-IEA;GO:0070588-IBA;GO:0015369-IEA;GO:0015369-IBA;GO:0055085-IEA;GO:0015297-IEA;GO:0008324-IEA;GO:0005773-IEA;GO:0006811-IEA;GO:0005774-IEA;GO:0006874-IBA \\ cation transport-IEA;plant-type vacuole membrane-IBA;membrane-IEA;calcium ion transport-IE…		Calcium/proton exchanger
TRINITY_DN28_c0_g2	FvH4_7g20060.1	31.8493	11.9968	-19.8525	-2.65482	0.00277033	0.274964	uncharacterized protein LOC112182463 \\ 0.00E+00 \\ 91.54 % \\ GO:0006979-IEA;GO:0004601-IEA;GO:0046872-IEA;GO:0016491-IEA;GO:0020037-IEA;GO:0055114-IEA;GO:0098869-IEA;GO:0005576-IEA;GO:0042744-IEA \\ response to oxidative stress-IEA;peroxidase activity-IEA;metal ion binding-IEA;oxidoreductase activity-IEA;heme binding-IEA;oxidation-reduction process-IEA;cellular oxidant detoxification-IEA;extrac…
TRINITY_DN253_c0_g1	FvH4_5g21040.1	180.765	67.8475	-112.918	-2.66429	0.000560752	0.108785	dynamin-related protein 1E-like \\ 0.00E+00 \\ 92.51 % \\ GO:0000266-IBA;GO:0005525-IEA;GO:0000166-IEA;GO:0005737-IBA;GO:0003924-IEA;GO:0003924-IBA;GO:0016020-IBA;GO:0008017-IBA \\ mitochondrial fission-IBA;GTP binding-IEA;nucleotide binding-IEA;cytoplasm-IBA;GTPase activity-IEA;GTPase activity-IBA;membrane-IBA;microtubule binding-IBA \\ GO:0000266;GO:0003924;GO:0005525;GO:0005737;GO:0008017;GO:0…		Dynamin central domain
TRINITY_DN2331_c0_g1	FvH4_6g50630.1	291.086	108.934	-182.152	-2.67213	0.0018463	0.213911	formate dehydrogenase, mitochondrial \\ 4.30E-30 \\ 56.48 % \\ GO:0000166-IEA;GO:0005737-IBA;GO:0000160-IEA;GO:0016310-IEA;GO:0016740-IEA;GO:0016301-IEA;GO:0035556-IBA;GO:0018105-IBA;GO:0005575-ND;GO:0004672-IEA;GO:0004674-IEA;GO:0004674-IBA;GO:0005524-IEA;GO:0005634-IBA;GO:0006468-IEA;GO:0005622-IEA \\ nucleotide binding-IEA;cytoplasm-IBA;phosphorelay signal transduction system-IEA;phosphorylati…	formate dehydrogenase [EC:1.17.1.9]	D-isomer specific 2-hydroxyacid dehydrogenase, catalytic domain
TRINITY_DN313_c0_g2	FvH4_6g50500.1	9.48825	3.5505	-5.93775	-2.67237	7.71326e-05	0.0350476	---NA---		Potassium transporter
TRINITY_DN15618_c0_g1	FvH4_7g10300.1	34.6345	12.9595	-21.675	-2.67252	0.000248166	0.0675973	disease resistance protein RPM1-like isoform X1 \\ 1.20E-22 \\ 57.02 % \\ GO:0043531-IEA;GO:0016787-IEA \\ ADP binding-IEA;hydrolase activity-IEA
TRINITY_DN20419_c0_g1	FvH4_6g30170.1	13.86	5.176	-8.684	-2.67774	0.0289184	0.929067	DUF761 domain protein		Protein of unknown function DUF761, plant
TRINITY_DN2159_c0_g1	FvH4_2g04580.1	9.83175	3.6705	-6.16125	-2.67859	0.00311784	0.294546	3-oxo-Delta(4,5)-steroid 5-beta-reductase-like \\ 0.00E+00 \\ 86.79 % \\ GO:0003854-IEA;GO:0050662-IEA;GO:0102294-IEA;GO:0016491-IEA;GO:0003824-IEA;GO:0016020-IEA;GO:0016021-IEA;GO:0055114-IEA;GO:0047568-IEA;GO:0047787-IEA \\ 3-beta-hydroxy-delta5-steroid dehydrogenase activity-IEA;coenzyme binding-IEA;cholesterol dehydrogenase activity-IEA;oxidoreductase activity-IEA;catalytic activity-IEA;membr…		NAD-dependent epimerase/dehydratase
TRINITY_DN401_c0_g3	FvH4_6g53000.1	4.7025	1.7535	-2.949	-2.68178	0.00384348	0.333069	beta-glucosidase 13-like \\ 0.00E+00 \\ 75.76 % \\ GO:0008152-IEA;GO:0008422-IEA;GO:0102483-IEA;GO:0004553-IEA;GO:0016787-IEA;GO:0005975-IEA;GO:0016798-IEA \\ metabolic process-IEA;beta-glucosidase activity-IEA;scopolin beta-glucosidase activity-IEA;hydrolase activity, hydrolyzing O-glycosyl compounds-IEA;hydrolase activity-IEA;carbohydrate metabolic process-IEA;hydrolase activity, acting on glyc…	beta-glucosidase [EC:3.2.1.21]	Glycoside hydrolase family 1
TRINITY_DN10410_c0_g1	FvH4_1g20220.1	31.2458	11.649	-19.5968	-2.68227	3.8736e-05	0.0237245	bifunctional riboflavin biosynthesis protein RIBA 1, chloroplastic-like \\ 0.00E+00 \\ 87.02 % \\ GO:0009570-IEA;GO:0009507-IEA;GO:0009507-IBA;GO:0003935-IEA;GO:0016020-IEA;GO:0009231-IEA;GO:0009231-IBA;GO:0016829-IEA;GO:0008686-IEA;GO:0008686-IBA;GO:0016787-IEA \\ chloroplast stroma-IEA;chloroplast-IEA;chloroplast-IBA;GTP cyclohydrolase II activity-IEA;membrane-IEA;riboflavin biosynthetic proces…	3,4-dihydroxy 2-butanone 4-phosphate synthase / GTP cyclohydrolase II [EC:4.1.99.12 3.5.4.25]	3,4-dihydroxy-2-butanone 4-phosphate synthase, RibB
TRINITY_DN11130_c0_g1	FvH4_3g40240.1	78.961	29.423	-49.538	-2.68365	0.000122303	0.0460049	Methyltransferase-related protein \\ 0.00E+00 \\ 77.16 %
TRINITY_DN20854_c0_g1	FvH4_4g22140.1	24.3463	9.06225	-15.284	-2.68656	1.27745e-06	0.00432946	DUF4228 domain-containing protein \\ 2.70E-42 \\ 75.04 % \\ GO:0016020-IEA;GO:0016021-IEA \\ membrane-IEA;integral component of membrane-IEA \\ GO:0016021 \\ integral component of membrane		Protein of unknown function DUF4228, plant
TRINITY_DN15483_c0_g1	FvH4_2g14470.1	31.7415	11.8048	-19.9367	-2.68888	0.000167343	0.054324	pathogen-related protein-like \\ 1.40E-162 \\ 88.03 %		Rossmann-like alpha/beta/alpha sandwich fold
TRINITY_DN2217_c0_g1	FvH4_6g11660.1	13.6143	5.06075	-8.5535	-2.69016	1.98094e-05	0.016197	putative leucine-rich repeat-containing, plant-type, leucine-rich repeat domain, L \\ 0.00E+00 \\ 76.06 % \\ GO:0016020-IEA;GO:0016021-IEA \\ membrane-IEA;integral component of membrane-IEA \\ GO:0016021 \\ integral component of membrane		Leucine-rich repeat
TRINITY_DN8054_c1_g1	FvH4_7g16520.1	50.0867	18.594	-31.4927	-2.6937	0.00151589	0.192181	cytochrome P450 CYP82D47-like \\ 0.00E+00 \\ 83.13 % \\ GO:0005506-IEA;GO:0046872-IEA;GO:0016491-IEA;GO:0016705-IEA;GO:0016020-IEA;GO:0016021-IEA;GO:0020037-IEA;GO:0055114-IEA;GO:0004497-IEA \\ iron ion binding-IEA;metal ion binding-IEA;oxidoreductase activity-IEA;oxidoreductase activity, acting on paired donors, with incorporation or reduction of molecular oxygen-IEA;membrane-IEA;integral compon…		Cytochrome P450
TRINITY_DN2577_c0_g2	FvH4_6g39640.1	15.0758	5.59375	-9.482	-2.69511	0.0195935	0.872406	putative cysteine-rich transmembrane CYSTM domain-containing protein \\ 7.10E-125 \\ 93.52 % \\ GO:0003723-IEA;GO:0003735-IEA;GO:0019843-IEA;GO:0005840-IEA;GO:0006412-IEA;GO:0005622-IEA \\ RNA binding-IEA;structural constituent of ribosome-IEA;rRNA binding-IEA;ribosome-IEA;translation-IEA;intracellular-IEA \\ GO:0003735;GO:0005840;GO:0006412;GO:0019843 \\ structural constituent of ribosome;riboso…		Cysteine-rich transmembrane CYSTM domain
TRINITY_DN6207_c0_g1	FvH4_6g15400.1	3.0705	1.13825	-1.93225	-2.69756	0.00662609	0.458752	---NA---	ribonuclease P protein subunit POP4 [EC:3.1.26.5]	Ribonuclease P/MRP, subunit p29
TRINITY_DN5694_c0_g1	FvH4_5g16230.1	174.461	64.6505	-109.811	-2.69853	0.0034038	0.310515	protein EDS1L-like \\ 0.00E+00 \\ 69.94 % \\ GO:0052689-IEA;GO:0006629-IEA;GO:0016787-IEA \\ carboxylic ester hydrolase activity-IEA;lipid metabolic process-IEA;hydrolase activity-IEA \\ GO:0006629;GO:0052689 \\ lipid metabolic process;carboxylic ester hydrolase activity		Fungal lipase-like domain
TRINITY_DN10987_c1_g1	FvH4_6g38620.1	10.8245	4.00925	-6.81525	-2.69988	4.09239e-05	0.024433	aspartyl protease family protein 2-like \\ 0.00E+00 \\ 86.61 % \\ GO:0004190-IEA;GO:0003735-IEA;GO:0008233-IEA;GO:0006508-IEA;GO:0005840-IEA;GO:0016787-IEA;GO:0006412-IEA \\ aspartic-type endopeptidase activity-IEA;structural constituent of ribosome-IEA;peptidase activity-IEA;proteolysis-IEA;ribosome-IEA;hydrolase activity-IEA;translation-IEA \\ GO:0003735;GO:0004190;GO:0005840;GO:0006412;GO:0006…		Aspartic peptidase A1 family
TRINITY_DN2878_c0_g1	FvH4_5g04200.1	5.19875	1.925	-3.27375	-2.70065	0.00272468	0.272538	hydroquinone glucosyltransferase-like \\ 0.00E+00 \\ 86.66 % \\ GO:0000166-IEA;GO:0016310-IEA;GO:0004672-IEA;GO:0016301-IEA;GO:0004674-IEA;GO:0005524-IEA;GO:0006468-IEA \\ nucleotide binding-IEA;phosphorylation-IEA;protein kinase activity-IEA;kinase activity-IEA;protein serine/threonine kinase activity-IEA;ATP binding-IEA;protein phosphorylation-IEA \\ GO:0004674;GO:0005524;GO:0006468 \\ protein …	hydroquinone glucosyltransferase [EC:2.4.1.218]	UDP-glucuronosyl/UDP-glucosyltransferase
TRINITY_DN12500_c1_g1	FvH4_1g23380.1	1.6735	0.619	-1.0545	-2.70355	9.96521e-05	0.0408671	G-type lectin S-receptor-like serine/threonine-protein kinase LECRK3 \\ 0.00E+00 \\ 81.96 % \\ GO:0000166-IEA;GO:0048544-IEA;GO:0016020-IEA;GO:0016021-IEA;GO:0016310-IEA;GO:0004672-IEA;GO:0016740-IEA;GO:0016301-IEA;GO:0004674-IEA;GO:0030246-IEA;GO:0005524-IEA;GO:0006468-IEA \\ nucleotide binding-IEA;recognition of pollen-IEA;membrane-IEA;integral component of membrane-IEA;phosphorylation-IEA;prot…		Protein kinase domain
TRINITY_DN5465_c0_g1	FvH4_3g05900.1	3.3735	1.247	-2.1265	-2.70529	0.0239551	0.929067	hypothetical protein RchiOBHm_Chr5g0013541
TRINITY_DN8388_c0_g2	FvH4_6g23140.1	1.43875	0.53125	-0.9075	-2.70824	0.00182707	0.212724	carboxyl-terminal-processing peptidase 3, chloroplastic \\ 0.00E+00 \\ 87.67 % \\ GO:0006508-IEA;GO:0008236-IEA;GO:0016787-IEA \\ proteolysis-IEA;serine-type peptidase activity-IEA;hydrolase activity-IEA \\ GO:0006508;GO:0008236 \\ proteolysis;serine-type peptidase activity	carboxyl-terminal processing protease [EC:3.4.21.102]	PDZ domain
TRINITY_DN4535_c0_g1	FvH4_1g28320.1	5.096	1.88025	-3.21575	-2.71028	0.00343015	0.311739	---NA---
TRINITY_DN9435_c0_g1	FvH4_3g44190.1	5.8815	2.16975	-3.71175	-2.71068	0.00614855	0.43678	protein NRT1/ PTR FAMILY 7.1-like \\ 0.00E+00 \\ 90.05 % \\ GO:0055085-IEA;GO:0016020-IEA;GO:0016021-IEA;GO:0022857-IEA \\ transmembrane transport-IEA;membrane-IEA;integral component of membrane-IEA;transmembrane transporter activity-IEA \\ GO:0016021;GO:0022857;GO:0055085 \\ integral component of membrane;transmembrane transporter activity;transmembrane transport		Proton-dependent oligopeptide transporter family
TRINITY_DN2594_c0_g2	FvH4_3g12720.1	30.524	11.248	-19.276	-2.71373	0.000457537	0.0969014	VQ motif-containing protein 22 \\ 0.00E+00 \\ 95.32 % \\ GO:0005737-IEA;GO:0016192-IEA;GO:0003824-IEA;GO:0016020-IEA;GO:0015031-IEA;GO:0031410-IEA;GO:0005198-IEA;GO:0030663-IEA;GO:0000139-IEA;GO:0005794-IEA;GO:0030117-IEA;GO:0006886-IEA \\ cytoplasm-IEA;vesicle-mediated transport-IEA;catalytic activity-IEA;membrane-IEA;protein transport-IEA;cytoplasmic vesicle-IEA;structural molecule activity-IEA…		VQ
TRINITY_DN18543_c0_g2	FvH4_3g24360.1	12.6635	4.66025	-8.00325	-2.71734	0.000185479	0.0577318	putative low molecular weight protein-tyrosine-phosphatase slr0328 \\ 0.00E+00 \\ 94.47 % \\ GO:0045492-IEA;GO:0016020-IEA;GO:0016021-IEA;GO:0008168-IEA;GO:0016740-IEA;GO:0030775-IEA;GO:0032259-IEA \\ xylan biosynthetic process-IEA;membrane-IEA;integral component of membrane-IEA;methyltransferase activity-IEA;transferase activity-IEA;glucuronoxylan 4-O-methyltransferase activity-IEA;methylation-I…	protein-tyrosine phosphatase [EC:3.1.3.48]	Protein-tyrosine phosphatase, low molecular weight
TRINITY_DN10486_c0_g1	FvH4_1g05110.1	8.31825	3.0575	-5.26075	-2.72061	0.00863005	0.535157	multiprotein-bridging factor 1c \\ 1.30E-05 \\ 78.38 %		Cro/C1-type helix-turn-helix domain
TRINITY_DN19938_c0_g1	FvH4_1g13440.1	36.0975	13.2523	-22.8452	-2.72388	0.00147031	0.188188	sulfite exporter TauE/SafE family protein 3-like \\ 0.00E+00 \\ 92.46 % \\ GO:0016020-IEA;GO:0016021-IEA \\ membrane-IEA;integral component of membrane-IEA \\ GO:0016021 \\ integral component of membrane		Transmembrane protein TauE-like
TRINITY_DN5906_c0_g1	FvH4_2g07730.1	2.254	0.82525	-1.42875	-2.73129	0.00213051	0.232802	DC1 domain-containing protein \\ 4.20E-93 \\ 71.11 %		Protein kinase C-like, phorbol ester/diacylglycerol-binding domain
TRINITY_DN1037_c0_g3	FvH4_7g27120.1	2.66575	0.97575	-1.69	-2.732	0.0139998	0.717302	hexose carrier protein HEX6-like \\ 0.00E+00 \\ 93.68 % \\ GO:0055085-IEA;GO:0016491-IEA;GO:0032440-IEA;GO:0016020-IEA;GO:0016021-IEA;GO:0008643-IEA;GO:0055114-IEA;GO:0015293-IEA;GO:0022857-IEA;GO:0005215-IEA \\ transmembrane transport-IEA;oxidoreductase activity-IEA;2-alkenal reductase [NAD(P)] activity-IEA;membrane-IEA;integral component of membrane-IEA;carbohydrate transport-IEA;oxidation-redu…		Sugar/inositol transporter
TRINITY_DN24747_c0_g2	FvH4_6g45410.1	1.1505	0.421	-0.7295	-2.73278	0.01151	0.636142	transcription factor CYCLOIDEA-like \\ 3.30E-158 \\ 65.72 % \\ GO:0003677-IEA;GO:0006351-IEA;GO:0006355-IEA;GO:0005634-IEA \\ DNA binding-IEA;transcription, DNA-templated-IEA;regulation of transcription, DNA-templated-IEA;nucleus-IEA \\ GO:0003677;GO:0005634;GO:0006355 \\ DNA binding;nucleus;regulation of transcription, DNA-templated		Transcription factor, TCP
TRINITY_DN14114_c0_g1	FvH4_6g19530.1	27.805	10.1197	-17.6852	-2.7476	0.0139769	0.716662	probable F-box protein At1g60180 \\ 0.00E+00 \\ 84.03 % \\ GO:0016020-IEA;GO:0016021-IEA \\ membrane-IEA;integral component of membrane-IEA \\ GO:0016021 \\ integral component of membrane		F-box domain
TRINITY_DN5947_c0_g1	FvH4_2g08760.1	2.6005	0.9445	-1.656	-2.75331	0.000457593	0.0969014	Erythronate-4-phosphate dehydrogenase family protein isoform 1 \\ 0.00E+00 \\ 83.26 % \\ GO:0016020-IEA;GO:0016021-IEA \\ membrane-IEA;integral component of membrane-IEA \\ GO:0016021 \\ integral component of membrane
TRINITY_DN7573_c0_g1	FvH4_6g53760.1	41.91	15.2075	-26.7025	-2.75588	7.37997e-05	0.0341374	squamosa promoter-binding-like protein 13A \\ 6.00E-150 \\ 62.82 % \\ GO:0003677-IEA;GO:0046872-IEA;GO:0005634-IEA \\ DNA binding-IEA;metal ion binding-IEA;nucleus-IEA		SBP domain
TRINITY_DN9887_c0_g1	FvH4_5g01730.1	13.904	5.04375	-8.86025	-2.75668	0.000877521	0.138503	replication factor C subunit 2 \\ 0.00E+00 \\ 90.60 % \\ GO:0003677-IEA;GO:0006260-IEA;GO:0016779-IEA;GO:0003887-IEA;GO:0071897-IEA;GO:0016740-IEA;GO:0005524-IEA;GO:0016787-IEA \\ DNA binding-IEA;DNA replication-IEA;nucleotidyltransferase activity-IEA;DNA-directed DNA polymerase activity-IEA;DNA biosynthetic process-IEA;transferase activity-IEA;ATP binding-IEA;hydrolase activity-IEA \\ GO:0003677…	replication factor C subunit 2/4	AAA+ ATPase domain
TRINITY_DN5182_c0_g1	FvH4_7g12810.1	2.61975	0.95	-1.66975	-2.75763	0.0314261	0.929067	transcription factor TCP9 \\ 2.80E-160 \\ 73.74 % \\ GO:0003677-IEA;GO:0008361-IEA;GO:0048364-IEA;GO:0006351-IEA;GO:1900056-IEA;GO:0006355-IEA;GO:0005634-IEA \\ DNA binding-IEA;regulation of cell size-IEA;root development-IEA;transcription, DNA-templated-IEA;negative regulation of leaf senescence-IEA;regulation of transcription, DNA-templated-IEA;nucleus-IEA \\ GO:0003677;GO:0005634;GO:0006355;GO…		Transcription factor, TCP
[truncated: 488 more rows]

## Sheet: N12I48 vs. BukI48, P<0.05
				NCGR1218_wounded-inoculated_WI-48h Vs Bukammen_wounded-inoculated_WI-48h
[truncated: 1,774 more rows]

## Sheet: Distinct genes_N16 & Buk
				NCGR1218_wounded-inoculated_WI-48h Vs NCGR1603_wounded-inoculated_WI-48h											NCGR1218_wounded-inoculated_WI-48h Vs Bukammen_wounded-inoculated_WI-48h
[truncated: 106 more rows]

[truncated: 5 more sheets: Shared distinct genes_N16+Buk, RPc-1 locus genes, NLRs, RLKs & RLPs common, Shared RPc-1 locus genes, PR genes]
