# Supplementary material for: Comparative Transcriptome Analysis Reveals Novel Candidate Resistance Genes Involved in Defence against Phytophthora cactorum in Strawberry
Source: Int J Mol Sci. 2023 Jun 29;24(13):10851. doi: 10.3390/ijms241310851 (PMC10341869; doi:10.3390/ijms241310851)
Supplement: Supplementary file 1 [file ijms-24-10851-s001.zip › Supplementary_material_S3.xlsx]

## Sheet: Description
Supplementary Material S3: Differentially expressed genes in the three Fragaria vesca genotypes in response to wounding and Phytophthora cactorum.
Sheet name	Description
NCGR1218	Fragaria vesca gene differentially expressed (fold change ≥ 2 or ≤ -2 , P < 0.05) between controls (untreated or wounded) and inoculated samples (48 hours after inoculation with Phytophthora cactorum) of the susceptible genotype NCGR1218.
NCGR1603	F. vesca genes differentially expressed (fold change ≥ 2 or ≤ -2 , P < 0.05) between controls (untreated or wounded) and inoculated samples (48 hours after inoculation with P. cactorum) of the resistant genotype NCGR1603
Bukammen	F. vesca genes differentially expressed (fold change ≥ 2 or ≤ -2 , P < 0.05) between controls (untreated or wounded) and inoculated samples (48 hours after inoculation with P. cactorum) of the resistant genotype Bukammen.
RPc-1 locus	Differentially expressed genes (DEGs) from the resistant locus RPc-1 (Resistance to Phytophthora cactorum 1). Comparisons were made between controls (untreated or wounded) and inoculated samples (48 hours after inoculation with P. cactorum) of the F. vesca genotypes.
PR proteins	Differentially expressed genes (DEGs) belonging to pathogenesis-related protein families. Comparisons were made between controls (untreated or wounded) and inoculated samples (48 hours after inoculation with P. cactorum) of the F. vesca genotypes.
Auxin	Differentially expressed genes (DEGs) involved in auxin biosynthesis and transport. Comparisons were made between controls (untreated or wounded) and inoculated samples (48 hours after inoculation with P. cactorum) of the F. vesca genotypes.
Salicylic acid	Differentially expressed genes (DEGs) involved in salicylic acid signalling and metabolism. Comparisons were made between controls (untreated or wounded) and inoculated samples (48 hours after inoculation with P. cactorum) of the F. vesca genotypes.
Jasmonic acid	Differentially expressed genes (DEGs) involved in jasmonic biosynthesis and metabolism. Comparisons were made between controls (untreated or wounded) and inoculated samples (48 hours after inoculation with P. cactorum) of the F. vesca genotypes.
Ethylene	Differentially expressed genes (DEGs) involved in ethylene biosyntheis and metabolism. Comparisons were made between controls (untreated or wounded) and inoculated samples (48 hours after inoculation with P. cactorum) of the F. vesca genotypes.
Flavonoid	Differentially expressed genes involved in flavanoid biosynthesis. Comparisons were made between controls (untreated or wounded) and inoculated samples (48 hours after inoculation with P. cactorum) of the F. vesca genotypes.
Isopreniod biosynthesis	Differentially expressed genes involved in isoprenoid biosynthesis. Comparisons were made between controls (untreated or wounded) and inoculated samples (48 hours after inoculation with P. cactorum) of the F. vesca genotypes.

## Sheet: NCGR1218
				NCGR1218_untreated_control_C0h Vs NCGR1218_wounded-inoculated_WI-48h											NCGR1218_wounded_W48h vs NCGR1218_wounded-inoculated_WI-48h
Trinity_ID	Fragaria_vesca4.0_ID	1218_C-0h Mean (TPM)	1218_WI-48h Mean (TPM)	Difference (TPM)	Fold change	P-value	FDR corrected p-value	NCBI_Nr_Annotations (<1E-3) with GO terms	Fragaria_vesca4.0_KEGG_orthologs_annotations	Fragaria_vesca4.0_InterPro_domain_annotations	Trinity_ID	Fragaria_vesca4.0_ID	1218_W-48h Mean (TPM)	1218_WI-48h Mean (TPM)	Difference	Fold change	P-value	FDR corrected p-value	NCBI_Nr_Annotations (<1E-3) with GO terms	Fragaria_vesca4.0_KEGG_orthologs_annotations	Fragaria_vesca4.0_InterPro_domain_annotations
Upregulated genes											Upregulated genes
TRINITY_DN510_c1_g3	FvH4_2g33890.1	0	5.81975	5.81975	#DIV/0!	7.00186e-05	0.0442929	glycine-rich cell wall structural protein 1.8-like \\ 8.20E-121 \\ 70.15 % \\ GO:0016757-IEA;GO:0016020-IEA;GO:0016021-IEA;GO:0016740-IEA \\ transferase activity, transferring glycosyl groups-IEA;membrane-IEA;integral component of membrane-IEA;transferase			TRINITY_DN510_c1_g3	FvH4_2g33890.1	0	5.81975	5.81975	#DIV/0!	7.00186e-05	0.0540617	glycine-rich cell wall structural protein 1.8-like \\ 8.20E-121 \\ 70.15 % \\ GO:0016757-IEA;GO:0016020-IEA;GO:0016021-IEA;GO:0016740-IEA \\ transferase activity, transferring glycosyl groups-IEA;membrane-IEA;integral component of membrane-IEA;transferase
TRINITY_DN25268_c0_g1	FvH4_4g18000.1	0	5.1715	5.1715	#DIV/0!	0.00284085	0.328892	peroxidase 5-like \\ 1.10E-109 \\ 82.63 % \\ GO:0005576-IEA \\ extracellular region-IEA \\ GO:0005576 \\ extracellular region	peroxidase [EC:1.11.1.7]	Plant peroxidase	TRINITY_DN8987_c0_g2	FvH4_5g18320.1	0	2.59125	2.59125	#DIV/0!	0.00799828	0.607502	hypothetical protein RchiOBHm_Chr5g0057351 \\ 1.70E-51 \\ 67.70 %
TRINITY_DN6321_c0_g2	FvH4_2g21560.1	0	2.7615	2.7615	#DIV/0!	0.000132118	0.0613899	ethylene-responsive transcription factor ERF098-like \\ 0.00E+00 \\ 99.70 % \\ GO:0006616-IEA;GO:0000166-IEA;GO:0006515-IEA;GO:0005829-IEA;GO:0051082-IEA;GO:0005524-IEA;GO:0016887-IEA;GO:0006457-IEA \\ SRP-dependent cotranslational protein targeting to me		AP2/ERF domain	TRINITY_DN25268_c0_g1	FvH4_4g18000.1	0.00925	5.1715	5.16225	559.081	0.00286655	0.357514	peroxidase 5-like \\ 1.10E-109 \\ 82.63 % \\ GO:0005576-IEA \\ extracellular region-IEA \\ GO:0005576 \\ extracellular region	peroxidase [EC:1.11.1.7]	Plant peroxidase
TRINITY_DN4304_c0_g2	FvH4_7g13410.1	0	1.901	1.901	#DIV/0!	0.0273191	1	BON1-associated protein 2-like		C2 domain	TRINITY_DN4051_c0_g2	FvH4_5g16260.1	0.30725	88.8788	88.5715	289.272	0.000110719	0.0670354	allene oxide synthase 3-like \\ 0.00E+00 \\ 85.76 % \\ GO:0005506-IEA;GO:0046872-IEA;GO:0016705-IEA;GO:0016829-IEA;GO:0020037-IEA;GO:0055114-IEA;GO:0047987-IEA;GO:0004497-IEA \\ iron ion binding-IEA;metal ion binding-IEA;oxidoreductase activity, acting on	hydroperoxide dehydratase [EC:4.2.1.92]	Cytochrome P450
TRINITY_DN838_c0_g4	FvH4_4g03460.1	0	1.363	1.363	#DIV/0!	0.00970207	0.645833	ethylene-responsive transcription factor ERF098		AP2/ERF domain	TRINITY_DN12303_c0_g1	FvH4_3g25010.1	0.1045	28.2445	28.14	270.282	0.00752304	0.588977	---NA--- \\ 2.40E-115 \\ 83.90 % \\ GO:0003700-IEA;GO:0006355-IEA \\ DNA-binding transcription factor activity-IEA;regulation of transcription, DNA-templated-IEA \\ GO:0003700;GO:0006355 \\ DNA-binding transcription factor activity;regulation of transcrip
TRINITY_DN609_c1_g1	FvH4_4g04180.1	0.13375	35.5932	35.4595	266.118	0.00110622	0.19836	cyclic nucleotide-gated ion channel 1-like \\ 0.00E+00 \\ 63.79 % \\ GO:0055085-IEA;GO:0016020-IEA;GO:0016021-IEA;GO:0034220-IEA;GO:0006811-IEA;GO:0005216-IEA \\ transmembrane transport-IEA;membrane-IEA;integral component of membrane-IEA;ion transmembrane	cyclic nucleotide gated channel, plant	Cyclic nucleotide-binding domain	TRINITY_DN201979_c0_g1	FvH4_2g22160.1	0.01325	2.9305	2.91725	221.17	0.00798249	0.606902	---NA---
TRINITY_DN3888_c0_g1	FvH4_3g21390.1	0.2135	49.3655	49.152	231.22	0.000186328	0.0753628	(-)-alpha-pinene synthase-like \\ 0.00E+00 \\ 76.48 % \\ GO:0000287-IEA;GO:0046872-IEA;GO:0016829-IEA;GO:0010333-IEA \\ magnesium ion binding-IEA;metal ion binding-IEA;lyase activity-IEA;terpene synthase activity-IEA \\ GO:0016829;GO:0046872 \\ lyase acti	(-)-germacrene D synthase [EC:4.2.3.75]	Terpene synthase, N-terminal domain	TRINITY_DN176801_c0_g1	FvH4_1g16830.1	0.51875	82.92	82.4013	159.846	6.43635e-07	0.00862107	hyphally-regulated protein-like
TRINITY_DN25238_c0_g1	FvH4_6g06890.1	0.0135	2.79575	2.78225	207.093	0.000181904	0.0742242	F-box protein PP2-B15-like		F-box domain	TRINITY_DN4304_c0_g1	FvH4_7g13400.1	0.52025	74.7055	74.1852	143.595	0.00233047	0.320871	BON1-associated protein 2-like		C2 domain
TRINITY_DN1756_c0_g1	FvH4_3g01670.1	0.214	40.7632	40.5493	190.482	0.0072127	0.54595	stigma-specific STIG1-like protein 1 \\ 9.20E-111 \\ 88.91 % \\ GO:0003735-IEA;GO:0005840-IEA;GO:0006412-IEA;GO:0005622-IEA \\ structural constituent of ribosome-IEA;ribosome-IEA;translation-IEA;intracellular-IEA \\ GO:0003735;GO:0005840;GO:0006412 \\ str		Stigma-specific protein Stig1	TRINITY_DN6321_c0_g2	FvH4_2g21560.1	0.021	2.7615	2.7405	131.5	0.000138474	0.0746657	ethylene-responsive transcription factor ERF098-like \\ 0.00E+00 \\ 99.70 % \\ GO:0006616-IEA;GO:0000166-IEA;GO:0006515-IEA;GO:0005829-IEA;GO:0051082-IEA;GO:0005524-IEA;GO:0016887-IEA;GO:0006457-IEA \\ SRP-dependent cotranslational protein targeting to me		AP2/ERF domain
TRINITY_DN201979_c0_g1	FvH4_2g22160.1	0.01625	2.9305	2.91425	180.338	0.0080224	0.57822	---NA---			TRINITY_DN2875_c0_g2	FvH4_1g15600.1	0.06975	7.675	7.60525	110.036	0.000871071	0.190726	patatin-like protein 2 \\ 7.00E-100 \\ 93.45 % \\ GO:0004601-IEA;GO:0016020-IEA;GO:0016021-IEA;GO:0098869-IEA \\ peroxidase activity-IEA;membrane-IEA;integral component of membrane-IEA;cellular oxidant detoxification-IEA \\ GO:0004601;GO:0016021;GO:009886		Patatin-like phospholipase domain
TRINITY_DN4304_c0_g1	FvH4_7g13400.1	0.46525	74.7055	74.2403	160.571	0.00232207	0.297648	BON1-associated protein 2-like		C2 domain	TRINITY_DN6189_c1_g1	FvH4_4g03450.1	0.06625	7.19075	7.1245	108.54	0.00119742	0.226611	ethylene-responsive transcription factor ERF096-like \\ 8.50E-144 \\ 67.36 % \\ GO:0051764-IEA;GO:0051764-IBA;GO:0051764-IDA;GO:0051017-IEA;GO:0051017-IDA;GO:0005737-IEA;GO:0005737-IDA;GO:0051015-IEA;GO:0051015-IPI;GO:0051015-IBA;GO:0003779-IEA;GO:0005509		AP2/ERF domain
TRINITY_DN23992_c0_g2	FvH4_5g35580.1	0.07325	11.7545	11.6813	160.471	0.000117705	0.0577216	probable pectinesterase/pectinesterase inhibitor 20 \\ 0.00E+00 \\ 86.75 % \\ GO:0004857-IEA;GO:0005618-IEA;GO:0043086-IEA;GO:0045330-IEA;GO:0030599-IEA;GO:0042545-IEA;GO:0045490-IEA;GO:0016787-IEA \\ enzyme inhibitor activity-IEA;cell wall-IEA;negative r	pectinesterase [EC:3.1.1.11]	Pectinesterase, catalytic	TRINITY_DN1218_c0_g2	FvH4_3g25000.1	0.1465	15.0905	14.944	103.007	0.00591105	0.519986	---NA--- \\ 1.80E-34 \\ 63.49 % \\ GO:0006629-IEA;GO:0016020-IEA;GO:0016021-IEA \\ lipid metabolic process-IEA;membrane-IEA;integral component of membrane-IEA
TRINITY_DN1218_c0_g2	FvH4_3g25000.1	0.09525	15.0905	14.9953	158.43	0.00580927	0.483693	---NA--- \\ 1.80E-34 \\ 63.49 % \\ GO:0006629-IEA;GO:0016020-IEA;GO:0016021-IEA \\ lipid metabolic process-IEA;membrane-IEA;integral component of membrane-IEA			TRINITY_DN16472_c0_g1	FvH4_3g01790.1	0.033	2.9245	2.8915	88.6212	0.000243857	0.101247	probable F-box protein At4g22030		Petal formation-expressed
TRINITY_DN292_c1_g1	FvH4_1g24170.1	0.0205	2.85275	2.83225	139.159	0.0177059	0.895235	putative cysteine desulfurase \\ 0.00E+00 \\ 84.00 % \\ GO:0031071-IEA;GO:0003824-IEA;GO:0016020-IEA;GO:0008483-IEA;GO:0016021-IEA;GO:0016740-IEA \\ cysteine desulfurase activity-IEA;catalytic activity-IEA;membrane-IEA;transaminase activity-IEA;integral c		Aminotransferase class V domain	TRINITY_DN17351_c0_g1	FvH4_1g12870.1	0.159	13.3678	13.2088	84.0739	1.23841e-06	0.0109005	ankyrin repeat-containing protein At5g02620-like \\ 0.00E+00 \\ 66.16 % \\ GO:2000031-IEA;GO:0016020-IEA;GO:0016021-IEA;GO:0071446-IEA;GO:0031347-IEA \\ regulation of salicylic acid mediated signaling pathway-IEA;membrane-IEA;integral component of membran		Ankyrin repeat
TRINITY_DN12303_c0_g1	FvH4_3g25010.1	0.22275	28.2445	28.0218	126.799	0.00767619	0.564689	---NA--- \\ 2.40E-115 \\ 83.90 % \\ GO:0003700-IEA;GO:0006355-IEA \\ DNA-binding transcription factor activity-IEA;regulation of transcription, DNA-templated-IEA \\ GO:0003700;GO:0006355 \\ DNA-binding transcription factor activity;regulation of transcrip			TRINITY_DN2213_c0_g2	FvH4_1g07710.1	0.03325	2.521	2.48775	75.8195	4.58872e-05	0.0441462	putative transcription factor bHLH041 isoform X1 \\ 0.00E+00 \\ 76.14 % \\ GO:0046983-IEA;GO:0016020-IEA;GO:0016021-IEA \\ protein dimerization activity-IEA;membrane-IEA;integral component of membrane-IEA \\ GO:0016020;GO:0046983 \\ membrane;protein dimer		Myc-type, basic helix-loop-helix (bHLH) domain
TRINITY_DN8987_c0_g2	FvH4_5g18320.1	0.02475	2.59125	2.5665	104.697	0.00836214	0.591763	hypothetical protein RchiOBHm_Chr5g0057351 \\ 1.70E-51 \\ 67.70 %			TRINITY_DN15423_c0_g1	FvH4_4g24970.1	0.03175	2.126	2.09425	66.9606	0.0164209	0.893401	RPM1-interacting protein 4-like \\ 5.40E-38 \\ 70.64 % \\ GO:0016020-IEA;GO:0016021-IEA;GO:0003950-IEA \\ membrane-IEA;integral component of membrane-IEA;NAD+ ADP-ribosyltransferase activity-IEA \\ GO:0016020 \\ membrane
TRINITY_DN11248_c0_g1	FvH4_2g16050.1	0.0155	1.39925	1.38375	90.2742	0.0177142	0.895505	lysine histidine transporter-like 8 \\ 0.00E+00 \\ 79.48 % \\ GO:0016020-IEA;GO:0016021-IEA \\ membrane-IEA;integral component of membrane-IEA \\ GO:0016021 \\ integral component of membrane		Amino acid transporter, transmembrane domain	TRINITY_DN838_c0_g4	FvH4_4g03460.1	0.02225	1.363	1.34075	61.2584	0.0105132	0.703862	ethylene-responsive transcription factor ERF098		AP2/ERF domain
TRINITY_DN3691_c0_g1	FvH4_6g46480.1	0.795	65.1015	64.3065	81.8887	0.00360966	0.375304	NADH-ubiquinone reductase complex 1 MLRQ subunit \\ 5.00E-157 \\ 99.56 % \\ GO:0000166-IEA;GO:0000165-IEA;GO:0005737-IEA;GO:0050850-IEA;GO:0004707-IEA;GO:0016310-IEA;GO:0016740-IEA;GO:0016301-IEA;GO:1903340-IEA;GO:1905665-IEA;GO:0004672-IEA;GO:0004674-IEA			TRINITY_DN6423_c0_g1	FvH4_2g41070.1	0.18075	10.9378	10.757	60.5131	0.000354503	0.121731	probable WRKY transcription factor 40 \\ 3.40E-102 \\ 74.68 %		WRKY domain
TRINITY_DN176801_c0_g1	FvH4_1g16830.1	1.0405	82.92	81.8795	79.6925	6.76945e-07	0.00587156	hyphally-regulated protein-like			TRINITY_DN4304_c0_g2	FvH4_7g13410.1	0.03325	1.901	1.86775	57.1729	0.0292422	1	BON1-associated protein 2-like		C2 domain
TRINITY_DN4010_c0_g2	FvH4_5g32830.1	0.08625	6.84925	6.763	79.4116	0.00331665	0.357812	putative powdery mildew resistance protein, RPW8 \\ 2.80E-10 \\ 90.74 % \\ GO:0016020-IEA;GO:0016021-IEA \\ membrane-IEA;integral component of membrane-IEA \\ GO:0016021 \\ integral component of membrane		Powdery mildew resistance protein, RPW8 domain	TRINITY_DN1497_c0_g2	FvH4_7g22340.1	0.512	28.3052	27.7932	55.2837	6.86147e-05	0.0535143	heat shock cognate 70 kDa protein-like \\ 0.00E+00 \\ 83.83 % \\ GO:0000166-IEA;GO:0005524-IEA \\ nucleotide binding-IEA;ATP binding-IEA \\ GO:0005524 \\ ATP binding	heat shock 70kDa protein 1/2/6/8	Heat shock protein 70 family
TRINITY_DN4051_c0_g2	FvH4_5g16260.1	1.1195	88.8788	87.7593	79.3915	0.000117245	0.0577216	allene oxide synthase 3-like \\ 0.00E+00 \\ 85.76 % \\ GO:0005506-IEA;GO:0046872-IEA;GO:0016705-IEA;GO:0016829-IEA;GO:0020037-IEA;GO:0055114-IEA;GO:0047987-IEA;GO:0004497-IEA \\ iron ion binding-IEA;metal ion binding-IEA;oxidoreductase activity, acting on	hydroperoxide dehydratase [EC:4.2.1.92]	Cytochrome P450	TRINITY_DN975_c0_g1	FvH4_6g28320.1	0.035	1.691	1.656	48.3143	1.71619e-05	0.0298705	leucine-rich repeat extensin-like protein 2 \\ 8.00E-135 \\ 85.84 % \\ GO:0016491-IEA;GO:0055114-IEA;GO:0003960-IEA \\ oxidoreductase activity-IEA;oxidation-reduction process-IEA;NADPH:quinone reductase activity-IEA \\ GO:0003960;GO:0055114 \\ NADPH:quino
TRINITY_DN180429_c0_g1	FvH4_1g25360.1	0.062	4.85825	4.79625	78.3589	2.07946e-05	0.0225278	protein DOG1-like 4 \\ 0.00E+00 \\ 78.97 % \\ GO:0035235-IEA;GO:0016020-IEA;GO:0016021-IEA;GO:0004970-IEA;GO:0006811-IEA \\ ionotropic glutamate receptor signaling pathway-IEA;membrane-IEA;integral component of membrane-IEA;ionotropic glutamate receptor a		Transcription factor TGA like domain	TRINITY_DN58526_c0_g1	FvH4_5g02030.1	0.0245	1.0865	1.062	44.3469	0.00141847	0.246886	protein LURP-one-related 4 \\ 3.90E-28 \\ 91.17 % \\ GO:0016310-IEA;GO:0004672-IEA;GO:0016740-IEA;GO:0016301-IEA;GO:0004674-IEA;GO:0005524-IEA;GO:0006468-IEA \\ phosphorylation-IEA;protein kinase activity-IEA;transferase activity-IEA;kinase activity-IEA;p		LURP-one-related
TRINITY_DN16472_c0_g1	FvH4_3g01790.1	0.038	2.9245	2.8865	76.9605	0.000247951	0.0891988	probable F-box protein At4g22030		Petal formation-expressed	TRINITY_DN9803_c0_g2	FvH4_3g10290.1	0.2175	9.61125	9.39375	44.1897	1.3171e-07	0.00314948	putative wall-associated receptor kinase-like 16 \\ 0.00E+00 \\ 81.57 % \\ GO:0016020-IEA;GO:0016021-IEA;GO:0005509-IEA;GO:0004672-IEA;GO:0016740-IEA;GO:0030247-IEA;GO:0005524-IEA;GO:0006468-IEA \\ membrane-IEA;integral component of membrane-IEA;calcium i		EGF-type aspartate/asparagine hydroxylation site
TRINITY_DN1497_c0_g2	FvH4_7g22340.1	0.37125	28.3052	27.934	76.2431	6.69432e-05	0.0436008	heat shock cognate 70 kDa protein-like \\ 0.00E+00 \\ 83.83 % \\ GO:0000166-IEA;GO:0005524-IEA \\ nucleotide binding-IEA;ATP binding-IEA \\ GO:0005524 \\ ATP binding	heat shock 70kDa protein 1/2/6/8	Heat shock protein 70 family	TRINITY_DN608_c0_g1	FvH4_6g39410.1	2.7	113.169	110.469	41.9146	0.00670785	0.557305	putative UDP-glucose flavonoid 3-O-glucosyltransferase 3 \\ 0.00E+00 \\ 72.03 % \\ GO:0003677-IEA;GO:0046982-IEA;GO:0008233-IEA;GO:0006508-IEA;GO:0005694-IEA;GO:0004252-IEA;GO:0000786-IEA;GO:0005634-IEA;GO:0016787-IEA \\ DNA binding-IEA;protein heterodime		UDP-glucuronosyl/UDP-glucosyltransferase
TRINITY_DN3005_c0_g1	FvH4_3g03890.1	0.24875	17.4715	17.2227	70.2372	0.00575563	0.480785	hypothetical protein RchiOBHm_Chr5g0006141 \\ 4.20E-40 \\ 58.76 % \\ GO:0031072-IEA;GO:0009408-IEA;GO:0046872-IEA;GO:0005829-IBA;GO:0051082-IEA;GO:0005524-IEA;GO:0006457-IEA \\ heat shock protein binding-IEA;response to heat-IEA;metal ion binding-IEA;cyto			TRINITY_DN9174_c0_g1	FvH4_1g15230.1	0.18275	7.3965	7.21375	40.4733	7.07048e-05	0.0543193	probable disease resistance protein At5g66900 \\ 0.00E+00 \\ 90.33 % \\ GO:0016020-IEA;GO:0016021-IEA;GO:0043531-IEA \\ membrane-IEA;integral component of membrane-IEA;ADP binding-IEA \\ GO:0016021;GO:0043531 \\ integral component of membrane;ADP binding		NB-ARC
TRINITY_DN3559_c0_g1	FvH4_2g35020.1	11.4703	759.623	748.153	66.2255	8.6415e-06	0.0181101	putative cupredoxin \\ 6.90E-06 \\ 89.76 % \\ GO:0005789-IEA;GO:0005737-IEA;GO:0016491-IEA;GO:0006629-IEA;GO:0016020-IEA;GO:0016021-IEA;GO:0055114-IEA;GO:0010025-IEA;GO:0102758-IEA;GO:0016627-IEA;GO:1905499-IEA;GO:0005783-IEA;GO:0010091-IEA;GO:0042335-IEA		Phytocyanin domain	TRINITY_DN16605_c0_g1	FvH4_7g03520.1	1.746	67.4108	65.6648	38.6087	0.000239909	0.100147	sigma factor binding protein 1, chloroplastic-like \\ 0.00E+00 \\ 95.52 % \\ GO:0016757-IEA;GO:0008184-IEA;GO:0004645-IEA;GO:0102250-IEA;GO:0030170-IEA;GO:0016740-IEA;GO:0102499-IEA;GO:0005975-IEA \\ transferase activity, transferring glycosyl groups-IEA;		VQ
TRINITY_DN9174_c0_g1	FvH4_1g15230.1	0.12525	7.3965	7.27125	59.0539	6.70935e-05	0.0436065	probable disease resistance protein At5g66900 \\ 0.00E+00 \\ 90.33 % \\ GO:0016020-IEA;GO:0016021-IEA;GO:0043531-IEA \\ membrane-IEA;integral component of membrane-IEA;ADP binding-IEA \\ GO:0016021;GO:0043531 \\ integral component of membrane;ADP binding		NB-ARC	TRINITY_DN556_c3_g1	FvH4_2g08100.1	0.68325	23.3257	22.6425	34.1394	2.10828e-05	0.0317588	UPF0496 protein At4g34320-like \\ 0.00E+00 \\ 56.17 % \\ GO:0016020-IEA;GO:0016021-IEA \\ membrane-IEA;integral component of membrane-IEA \\ GO:0016021 \\ integral component of membrane		Protein of unknown function DUF677
TRINITY_DN224_c0_g1	FvH4_3g17500.1	0.1905	10.425	10.2345	54.7244	0.000572595	0.141572	alpha-amylase/subtilisin inhibitor-like \\ 8.70E-42 \\ 61.82 % \\ GO:0005524-IEA \\ ATP binding-IEA		Proteinase inhibitor I3, Kunitz legume	TRINITY_DN14751_c0_g1	FvH4_4g15000.1	1.46375	47.1305	45.6668	32.1985	0.000531275	0.149744	2-hydroxyisoflavanone dehydratase-like \\ 0.00E+00 \\ 95.70 % \\ GO:0000287-IEA;GO:0030976-IEA;GO:0046872-IEA;GO:0003824-IEA;GO:0004737-IEA;GO:0016829-IEA;GO:0016831-IEA \\ magnesium ion binding-IEA;thiamine pyrophosphate binding-IEA;metal ion binding-IEA		Alpha/beta hydrolase fold-3
TRINITY_DN2875_c0_g2	FvH4_1g15600.1	0.143	7.675	7.532	53.6713	0.000931071	0.180627	patatin-like protein 2 \\ 7.00E-100 \\ 93.45 % \\ GO:0004601-IEA;GO:0016020-IEA;GO:0016021-IEA;GO:0098869-IEA \\ peroxidase activity-IEA;membrane-IEA;integral component of membrane-IEA;cellular oxidant detoxification-IEA \\ GO:0004601;GO:0016021;GO:009886		Patatin-like phospholipase domain	TRINITY_DN1660_c0_g2	FvH4_5g17150.1	0.279	8.58	8.301	30.7527	0.00188784	0.284812	laccase-1 \\ 0.00E+00 \\ 87.64 % \\ GO:0048046-IEA;GO:0046274-IEA;GO:0046872-IEA;GO:0016491-IEA;GO:0005507-IEA;GO:0016020-IEA;GO:0016021-IEA;GO:0055114-IEA;GO:0052716-IEA;GO:0005576-IEA;GO:0016722-IBA \\ apoplast-IEA;lignin catabolic process-IEA;metal ion	laccase [EC:1.10.3.2]	Multicopper oxidase, type 1
TRINITY_DN975_c0_g1	FvH4_6g28320.1	0.03175	1.691	1.65925	53.2598	1.55623e-05	0.0201682	leucine-rich repeat extensin-like protein 2 \\ 8.00E-135 \\ 85.84 % \\ GO:0016491-IEA;GO:0055114-IEA;GO:0003960-IEA \\ oxidoreductase activity-IEA;oxidation-reduction process-IEA;NADPH:quinone reductase activity-IEA \\ GO:0003960;GO:0055114 \\ NADPH:quino			TRINITY_DN11248_c0_g1	FvH4_2g16050.1	0.04775	1.39925	1.3515	29.3037	0.0195003	0.980329	lysine histidine transporter-like 8 \\ 0.00E+00 \\ 79.48 % \\ GO:0016020-IEA;GO:0016021-IEA \\ membrane-IEA;integral component of membrane-IEA \\ GO:0016021 \\ integral component of membrane		Amino acid transporter, transmembrane domain
TRINITY_DN6423_c0_g1	FvH4_2g41070.1	0.235	10.9378	10.7028	46.5436	0.000367039	0.110137	probable WRKY transcription factor 40 \\ 3.40E-102 \\ 74.68 %		WRKY domain	TRINITY_DN25238_c0_g1	FvH4_6g06890.1	0.096	2.79575	2.69975	29.1224	0.000217067	0.0945852	F-box protein PP2-B15-like		F-box domain
TRINITY_DN1443_c0_g4	FvH4_5g03370.1	0.48225	21.7963	21.314	45.197	7.20242e-09	0.00110942	putative Late embryogenesis abundant protein, LEA-14 \\ 7.10E-118 \\ 84.96 % \\ GO:0031408-IEA;GO:0031408-IBA;GO:0003824-IEA;GO:0016491-IEA;GO:0010181-IEA;GO:0016629-IEA;GO:0016629-IBA;GO:0009695-IEA;GO:0009695-IBA;GO:0055114-IEA;GO:0005777-IEA;GO:0005777		Late embryogenesis abundant protein, LEA-14	TRINITY_DN3336_c0_g1	FvH4_4g02490.1	0.0355	1.0095	0.974	28.4366	2.86634e-05	0.0358956	UPF0481 protein At3g47200-like \\ 0.00E+00 \\ 57.33 % \\ GO:0016020-IEA;GO:0016021-IEA \\ membrane-IEA;integral component of membrane-IEA		Protein of unknown function DUF247, plant
TRINITY_DN17351_c0_g1	FvH4_1g12870.1	0.301	13.3678	13.0668	44.4111	1.37445e-06	0.00776886	ankyrin repeat-containing protein At5g02620-like \\ 0.00E+00 \\ 66.16 % \\ GO:2000031-IEA;GO:0016020-IEA;GO:0016021-IEA;GO:0071446-IEA;GO:0031347-IEA \\ regulation of salicylic acid mediated signaling pathway-IEA;membrane-IEA;integral component of membran		Ankyrin repeat	TRINITY_DN12312_c0_g1	FvH4_3g44500.1	0.69125	19.5223	18.831	28.242	4.31255e-05	0.0427192	hypothetical protein RchiOBHm_Chr5g0081201 \\ 4.10E-18 \\ 54.33 % \\ GO:0016020-IEA;GO:0005509-IEA;GO:0016021-IEA \\ membrane-IEA;calcium ion binding-IEA;integral component of membrane-IEA
TRINITY_DN23432_c0_g1	FvH4_3g41220.1	0.1675	7.34425	7.17675	43.8463	0.00360602	0.375181	cytochrome P450 714C2-like \\ 0.00E+00 \\ 89.38 % \\ GO:0005506-IEA;GO:0016491-IEA;GO:0046872-IEA;GO:0016705-IEA;GO:0016020-IEA;GO:0016021-IEA;GO:0020037-IEA;GO:0055114-IEA;GO:0004497-IEA \\ iron ion binding-IEA;oxidoreductase activity-IEA;metal ion bindi		Cytochrome P450	TRINITY_DN8093_c0_g2	FvH4_2g06190.1	0.323	9.07625	8.75325	28.0998	5.51279e-05	0.0485235	protein PLANT CADMIUM RESISTANCE 2-like		PLAC8 motif-containing protein
TRINITY_DN12554_c0_g1	FvH4_6g13620.1	0.14875	6.285	6.13625	42.2521	0.00146622	0.232955	elicitor-responsive protein 1-like \\ 2.10E-06 \\ 44.62 % \\ GO:0015698-IEA;GO:0055085-IEA;GO:0008308-IEA;GO:0098656-IEA;GO:0005741-IEA \\ inorganic anion transport-IEA;transmembrane transport-IEA;voltage-gated anion channel activity-IEA;anion transmembra		C2 domain	TRINITY_DN24531_c0_g2	FvH4_4g03470.1	2.224	62.1977	59.9737	27.9666	1.16633e-05	0.0236389	ethylene-responsive transcription factor 1B	ethylene-responsive transcription factor 1	AP2/ERF domain
TRINITY_DN17343_c0_g1	FvH4_5g36590.1	0.5535	23.327	22.7735	42.1445	1.05995e-07	0.00326538	chromodomain-helicase-DNA-binding protein 9-like		Uncharacterised protein family UPF0503	TRINITY_DN326962_c0_g1	FvH4_4g02930.1	0.2685	7.48125	7.21275	27.8631	0.00456075	0.454753	Proteinase inhibitor I13, potato inhibitor I \\ 6.70E-55 \\ 95.63 % \\ GO:0005525-IEA;GO:0000166-IEA;GO:0016787-IEA;GO:0005622-IEA \\ GTP binding-IEA;nucleotide binding-IEA;hydrolase activity-IEA;intracellular-IEA \\ GO:0005525;GO:0005622;GO:0016787 \\ GT		Proteinase inhibitor I13, potato inhibitor I
TRINITY_DN7311_c0_g1	FvH4_5g20290.1	4.129	166.78	162.651	40.3924	0.00679355	0.52771	expansin-like B1 \\ 1.60E-07 \\ 99.22 % \\ GO:0004722-IEA;GO:0046872-IEA;GO:0003824-IEA;GO:0006470-IEA;GO:0043169-IEA;GO:0016787-IEA;GO:0004721-IEA \\ protein serine/threonine phosphatase activity-IEA;metal ion binding-IEA;catalytic activity-IEA;protein d		Expansin/pollen allergen, DPBB domain	TRINITY_DN1074_c0_g3	FvH4_6g39850.1	0.8395	23.3568	22.5173	27.8222	0.000247109	0.101638	7-deoxyloganetin glucosyltransferase-like \\ 0.00E+00 \\ 85.52 % \\ GO:0016757-IEA;GO:0016758-IEA;GO:0016740-IEA \\ transferase activity, transferring glycosyl groups-IEA;transferase activity, transferring hexosyl groups-IEA;transferase activity-IEA \\ GO	7-deoxyloganetin glucosyltransferase [EC:2.4.1.324]	UDP-glucuronosyl/UDP-glucosyltransferase
TRINITY_DN7285_c2_g2	FvH4_3g26390.1	0.05875	2.354	2.29525	40.0681	5.33803e-05	0.0380331	E3 ubiquitin-protein ligase PUB23-like \\ 2.60E-64 \\ 62.16 % \\ GO:0016020-IEA;GO:0016021-IEA \\ membrane-IEA;integral component of membrane-IEA \\ GO:0016021 \\ integral component of membrane		U box domain	TRINITY_DN180429_c0_g1	FvH4_1g25360.1	0.178	4.85825	4.68025	27.2935	2.64375e-05	0.034806	protein DOG1-like 4 \\ 0.00E+00 \\ 78.97 % \\ GO:0035235-IEA;GO:0016020-IEA;GO:0016021-IEA;GO:0004970-IEA;GO:0006811-IEA \\ ionotropic glutamate receptor signaling pathway-IEA;membrane-IEA;integral component of membrane-IEA;ionotropic glutamate receptor a		Transcription factor TGA like domain
TRINITY_DN237671_c0_g1	FvH4_2g33680.1	0.79725	31.4525	30.6552	39.4512	0.000891602	0.175849	Transmembrane protein			TRINITY_DN5665_c0_g1	FvH4_6g40950.1	0.09125	2.47625	2.385	27.137	6.14452e-05	0.0511868	calcium-transporting ATPase 12, plasma membrane-type-like \\ 0.00E+00 \\ 72.71 % \\ GO:0000166-IEA;GO:0016020-IEA;GO:0016021-IEA;GO:0005388-IEA;GO:0070588-IEA;GO:0016787-IEA;GO:0099132-IEA \\ nucleotide binding-IEA;membrane-IEA;integral component of membr	Ca2+-transporting ATPase [EC:3.6.3.8]	P-type ATPase
TRINITY_DN7922_c0_g1	FvH4_6g11440.1	1.257	49.5875	48.3305	39.4491	0.00262274	0.317271	(-)-germacrene D synthase-like \\ 0.00E+00 \\ 78.46 % \\ GO:0000287-IEA;GO:0046872-IEA;GO:0016829-IEA;GO:0010333-IEA \\ magnesium ion binding-IEA;metal ion binding-IEA;lyase activity-IEA;terpene synthase activity-IEA \\ GO:0016829;GO:0046872 \\ lyase acti	(-)-germacrene D synthase [EC:4.2.3.75]	Terpene synthase, N-terminal domain	TRINITY_DN35309_c0_g3	FvH4_5g05180.1	0.17275	4.512	4.33925	26.1187	4.76383e-05	0.0445998	transcription factor bHLH162-like \\ 6.10E-113 \\ 56.26 % \\ GO:0003677-IEA;GO:0006355-IEA \\ DNA binding-IEA;regulation of transcription, DNA-templated-IEA		Myc-type, basic helix-loop-helix (bHLH) domain
TRINITY_DN8726_c0_g1	FvH4_3g14420.1	0.27325	10.592	10.3188	38.763	0.000703262	0.156203	---NA--- \\ 4.10E-81 \\ 80.71 % \\ GO:0008270-IEA;GO:0046872-IEA;GO:0016818-IEA;GO:0016310-IEA;GO:0004683-IEA;GO:0004386-IEA;GO:0016740-IEA;GO:0016301-IEA;GO:0005524-IEA;GO:0016787-IEA;GO:0003676-IEA;GO:0006468-IEA \\ zinc ion binding-IEA;metal ion bindin			TRINITY_DN2969_c0_g1	FvH4_4g30920.1	0.3935	10.2695	9.876	26.0978	4.76031e-07	0.00733254	phosphate transporter PHO1 homolog 3-like \\ 0.00E+00 \\ 89.07 % \\ GO:0016020-IEA;GO:0016021-IEA \\ membrane-IEA;integral component of membrane-IEA \\ GO:0016021 \\ integral component of membrane		SPX domain
TRINITY_DN16605_c0_g1	FvH4_7g03520.1	1.773	67.4108	65.6378	38.0207	0.000241056	0.0878843	sigma factor binding protein 1, chloroplastic-like \\ 0.00E+00 \\ 95.52 % \\ GO:0016757-IEA;GO:0008184-IEA;GO:0004645-IEA;GO:0102250-IEA;GO:0030170-IEA;GO:0016740-IEA;GO:0102499-IEA;GO:0005975-IEA \\ transferase activity, transferring glycosyl groups-IEA;		VQ	TRINITY_DN1439_c1_g1	FvH4_1g21540.1	1.027	26.3583	25.3313	25.6653	7.7344e-05	0.0556714	L-ascorbate oxidase-like \\ 0.00E+00 \\ 89.28 % \\ GO:0016491-IEA;GO:0046872-IEA;GO:0005507-IEA;GO:0055114-IEA;GO:0005576-IEA;GO:0016722-IBA \\ oxidoreductase activity-IEA;metal ion binding-IEA;copper ion binding-IEA;oxidation-reduction process-IEA;extrac		Multicopper oxidase, type 1
TRINITY_DN12127_c0_g1	FvH4_3g42100.1	0.0465	1.741	1.6945	37.4409	0.010126	0.661336	heavy metal-associated isoprenylated plant protein 47-like			TRINITY_DN2039_c0_g2	FvH4_3g01760.1	3.433	87.0683	83.6352	25.3621	0.00078604	0.179774	putative methyltransferase DDB_G0268948 \\ 7.20E-05 \\ 86.92 %		Methyltransferase type 11
TRINITY_DN1660_c0_g2	FvH4_5g17150.1	0.22975	8.58	8.35025	37.3449	0.00182217	0.26293	laccase-1 \\ 0.00E+00 \\ 87.64 % \\ GO:0048046-IEA;GO:0046274-IEA;GO:0046872-IEA;GO:0016491-IEA;GO:0005507-IEA;GO:0016020-IEA;GO:0016021-IEA;GO:0055114-IEA;GO:0052716-IEA;GO:0005576-IEA;GO:0016722-IBA \\ apoplast-IEA;lignin catabolic process-IEA;metal ion	laccase [EC:1.10.3.2]	Multicopper oxidase, type 1	TRINITY_DN1443_c0_g4	FvH4_5g03370.1	0.86225	21.7963	20.934	25.2783	1.06292e-08	0.00163727	putative Late embryogenesis abundant protein, LEA-14 \\ 7.10E-118 \\ 84.96 % \\ GO:0031408-IEA;GO:0031408-IBA;GO:0003824-IEA;GO:0016491-IEA;GO:0010181-IEA;GO:0016629-IEA;GO:0016629-IBA;GO:0009695-IEA;GO:0009695-IBA;GO:0055114-IEA;GO:0005777-IEA;GO:0005777		Late embryogenesis abundant protein, LEA-14
TRINITY_DN6189_c1_g1	FvH4_4g03450.1	0.20125	7.19075	6.9895	35.7304	0.00133681	0.219999	ethylene-responsive transcription factor ERF096-like \\ 8.50E-144 \\ 67.36 % \\ GO:0051764-IEA;GO:0051764-IBA;GO:0051764-IDA;GO:0051017-IEA;GO:0051017-IDA;GO:0005737-IEA;GO:0005737-IDA;GO:0051015-IEA;GO:0051015-IPI;GO:0051015-IBA;GO:0003779-IEA;GO:0005509		AP2/ERF domain	TRINITY_DN17343_c0_g1	FvH4_5g36590.1	0.9265	23.327	22.4005	25.1775	1.19334e-07	0.00314948	chromodomain-helicase-DNA-binding protein 9-like		Uncharacterised protein family UPF0503
TRINITY_DN17174_c0_g1	FvH4_4g35190.1	2.28825	81.7135	79.4252	35.71	4.96857e-05	0.0368232	CDP-diacylglycerol-glycerol-3-phosphate 3-phosphatidyltransferase \\ 1.90E-22 \\ 66.37 % \\ GO:0006606-IEA;GO:0008150-ND;GO:0005575-ND;GO:0003674-ND;GO:0016787-IEA;GO:0005622-IEA \\ protein import into nucleus-IEA;biological_process-ND;cellular_component-			TRINITY_DN11596_c0_g1	FvH4_5g01820.1	3.0315	76.233	73.2015	25.147	0.0145844	0.841153	protein P21-like \\ 0.00E+00 \\ 89.90 % \\ GO:0004613-IEA;GO:0004613-IBA;GO:0005525-IEA;GO:0000166-IEA;GO:0071333-IBA;GO:0046872-IEA;GO:0017076-IEA;GO:0016020-IEA;GO:0005829-N/A;GO:0005829-IBA;GO:0042594-IBA;GO:0016021-IEA;GO:0019543-IBA;GO:0016310-IEA;GO		Thaumatin
TRINITY_DN3336_c0_g1	FvH4_4g02490.1	0.0285	1.0095	0.981	35.4211	2.99985e-05	0.0270762	UPF0481 protein At3g47200-like \\ 0.00E+00 \\ 57.33 % \\ GO:0016020-IEA;GO:0016021-IEA \\ membrane-IEA;integral component of membrane-IEA		Protein of unknown function DUF247, plant	TRINITY_DN6203_c0_g2	FvH4_2g13240.1	0.49575	12.3432	11.8475	24.8981	0.000147249	0.0767602	ethylene-responsive transcription factor ABR1-like \\ 4.20E-72 \\ 76.48 % \\ GO:0003677-IEA;GO:0003700-IEA;GO:0006351-IEA;GO:0006355-IEA;GO:0005634-IEA \\ DNA binding-IEA;DNA-binding transcription factor activity-IEA;transcription, DNA-templated-IEA;regul		AP2/ERF domain
TRINITY_DN13913_c0_g1	FvH4_6g10200.1	0.11625	4.008	3.89175	34.4774	2.12326e-05	0.0225278	Methyltransferase-related protein			TRINITY_DN7453_c1_g1	FvH4_6g48230.1	0.54275	12.587	12.0442	23.1912	8.73413e-07	0.00925697	pentatricopeptide repeat-containing protein At5g39680 \\ 0.00E+00 \\ 88.35 % \\ GO:0008270-IEA \\ zinc ion binding-IEA \\ GO:0008270 \\ zinc ion binding		Pentatricopeptide repeat
TRINITY_DN2944_c0_g1	FvH4_4g19020.1	7.69175	265.107	257.415	34.4664	0.00029154	0.0970971	major allergen Pru ar 1-like		Bet v I/Major latex protein	TRINITY_DN542_c3_g1	FvH4_3g37310.1	0.178	4.124	3.946	23.1685	3.95748e-05	0.0414688	UDP-glucose iridoid glucosyltransferase-like \\ 6.60E-164 \\ 72.68 % \\ GO:0003677-IEA;GO:0003700-IEA;GO:0006351-IEA;GO:0006355-IEA;GO:0005634-IEA \\ DNA binding-IEA;DNA-binding transcription factor activity-IEA;transcription, DNA-templated-IEA;regulation		UDP-glucuronosyl/UDP-glucosyltransferase
TRINITY_DN14751_c0_g1	FvH4_4g15000.1	1.36775	47.1305	45.7627	34.4584	0.000527368	0.135615	2-hydroxyisoflavanone dehydratase-like \\ 0.00E+00 \\ 95.70 % \\ GO:0000287-IEA;GO:0030976-IEA;GO:0046872-IEA;GO:0003824-IEA;GO:0004737-IEA;GO:0016829-IEA;GO:0016831-IEA \\ magnesium ion binding-IEA;thiamine pyrophosphate binding-IEA;metal ion binding-IEA		Alpha/beta hydrolase fold-3	TRINITY_DN24013_c0_g1	FvH4_6g44340.1	0.08825	2.044	1.95575	23.1615	0.000380965	0.126606	myb-related protein Myb4-like \\ 2.20E-150 \\ 80.78 % \\ GO:0043531-IEA;GO:0016787-IEA \\ ADP binding-IEA;hydrolase activity-IEA \\ GO:0016787;GO:0043531 \\ hydrolase activity;ADP binding	transcription factor MYB, plant	SANT/Myb domain
TRINITY_DN230619_c0_g1	FvH4_7g30570.1	0.12325	4.229	4.10575	34.3124	3.62902e-06	0.0122856	late embryogenesis abundant protein At1g64065-like \\ 1.50E-89 \\ 87.52 % \\ GO:0005509-IEA;GO:0009523-IEA;GO:0009654-IEA;GO:0015979-IEA;GO:0019898-IEA \\ calcium ion binding-IEA;photosystem II-IEA;photosystem II oxygen evolving complex-IEA;photosynthesis		Late embryogenesis abundant protein, LEA-14	TRINITY_DN17174_c0_g1	FvH4_4g35190.1	3.535	81.7135	78.1785	23.1156	5.43151e-05	0.048501	CDP-diacylglycerol-glycerol-3-phosphate 3-phosphatidyltransferase \\ 1.90E-22 \\ 66.37 % \\ GO:0006606-IEA;GO:0008150-ND;GO:0005575-ND;GO:0003674-ND;GO:0016787-IEA;GO:0005622-IEA \\ protein import into nucleus-IEA;biological_process-ND;cellular_component-
TRINITY_DN5665_c0_g1	FvH4_6g40950.1	0.07225	2.47625	2.404	34.2734	5.88291e-05	0.0402744	calcium-transporting ATPase 12, plasma membrane-type-like \\ 0.00E+00 \\ 72.71 % \\ GO:0000166-IEA;GO:0016020-IEA;GO:0016021-IEA;GO:0005388-IEA;GO:0070588-IEA;GO:0016787-IEA;GO:0099132-IEA \\ nucleotide binding-IEA;membrane-IEA;integral component of membr	Ca2+-transporting ATPase [EC:3.6.3.8]	P-type ATPase	TRINITY_DN31853_c2_g1	FvH4_6g43220.1	0.1015	2.31275	2.21125	22.7857	0.00208049	0.300765	protein DETOXIFICATION 40-like \\ 1.80E-116 \\ 81.66 % \\ GO:0003677-IEA \\ DNA binding-IEA \\ GO:0003677 \\ DNA binding		Multi antimicrobial extrusion protein
TRINITY_DN15385_c0_g1	FvH4_4g18960.1	3.436	112.869	109.433	32.8491	3.79525e-06	0.0127087	major allergen Pru ar 1-like \\ 2.20E-13 \\ 58.43 % \\ GO:0008233-IEA;GO:0006508-IEA;GO:0004252-IEA;GO:0008236-IEA;GO:0016787-IEA \\ peptidase activity-IEA;proteolysis-IEA;serine-type endopeptidase activity-IEA;serine-type peptidase activity-IEA;hydrolase		Bet v I/Major latex protein	TRINITY_DN1696_c0_g2	FvH4_6g32100.1	0.43275	9.854	9.42125	22.7707	2.82062e-05	0.0357312	ankyrin repeat-containing protein At5g02620-like \\ 1.50E-179 \\ 76.38 % \\ GO:0008270-IEA;GO:0006355-IEA \\ zinc ion binding-IEA;regulation of transcription, DNA-templated-IEA \\ GO:0006355 \\ regulation of transcription, DNA-templated		Ankyrin repeat
TRINITY_DN2108_c0_g1	FvH4_5g31290.1	0.05725	1.87025	1.813	32.6681	0.00922138	0.628086	putative F-box protein At1g47790 \\ 0.00E+00 \\ 63.76 % \\ GO:0016020-IEA;GO:0016021-IEA;GO:0016874-IEA;GO:0005774-IEA \\ membrane-IEA;integral component of membrane-IEA;ligase activity-IEA;vacuolar membrane-IEA \\ GO:0016021 \\ integral component of memb			TRINITY_DN172294_c0_g1	FvH4_4g02610.1	0.0715	1.6025	1.531	22.4126	0.0235	1	transcription factor bHLH92 \\ 4.90E-131 \\ 82.40 % \\ GO:0016192-IEA;GO:0016020-IEA;GO:0016021-IEA;GO:0005622-IEA;GO:0006886-IEA \\ vesicle-mediated transport-IEA;membrane-IEA;integral component of membrane-IEA;intracellular-IEA;intracellular protein tra		Myc-type, basic helix-loop-helix (bHLH) domain
TRINITY_DN6807_c1_g1	FvH4_7g33270.1	0.416	13.5717	13.1557	32.6244	0.000111099	0.0563638	PREDICTED: uncharacterized protein LOC101292349 \\ 4.70E-09 \\ 83.47 % \\ GO:0055085-IEA;GO:0016020-IEA;GO:0016021-IEA;GO:0022857-IEA \\ transmembrane transport-IEA;membrane-IEA;integral component of membrane-IEA;transmembrane transporter activity-IEA		Protein of unknown function DUF599	TRINITY_DN19966_c0_g1	FvH4_6g54230.1	0.0965	2.066	1.9695	21.4093	0.000268214	0.105875	protein SDA1 homolog
TRINITY_DN556_c3_g1	FvH4_2g08100.1	0.72125	23.3257	22.6045	32.3407	2.1257e-05	0.0225278	UPF0496 protein At4g34320-like \\ 0.00E+00 \\ 56.17 % \\ GO:0016020-IEA;GO:0016021-IEA \\ membrane-IEA;integral component of membrane-IEA \\ GO:0016021 \\ integral component of membrane		Protein of unknown function DUF677	TRINITY_DN32506_c0_g1	FvH4_3g42050.1	0.177	3.78675	3.60975	21.3941	3.98139e-05	0.0415779	heavy metal-associated isoprenylated plant protein 47-like \\ 2.50E-93 \\ 95.38 % \\ GO:0071341-IEA;GO:0005737-IEA;GO:0005826-IEA;GO:0016460-IEA;GO:1903475-IEA;GO:0071574-IEA;GO:0005509-IEA;GO:1903479-IEA \\ medial cortical node-IEA;cytoplasm-IEA;actomyos
TRINITY_DN2718_c0_g1	FvH4_7g15310.1	0.371	11.805	11.434	31.8194	0.000444415	0.12279	1-aminocyclopropane-1-carboxylate synthase 1 \\ 0.00E+00 \\ 89.99 % \\ GO:0042218-IEA;GO:0016847-IEA;GO:0030170-IEA;GO:0009058-IEA;GO:0003824-IEA;GO:0016829-IEA;GO:0009693-IEA;GO:0009835-IEA \\ 1-aminocyclopropane-1-carboxylate biosynthetic process-IEA;1-	1-aminocyclopropane-1-carboxylate synthase 1/2/6 [EC:4.4.1.14]	Aminotransferases, class-I, pyridoxal-phosphate-binding site	TRINITY_DN11177_c0_g1	FvH4_6g07410.1	0.084	1.7855	1.7015	21.256	0.00216787	0.308193	PREDICTED: uncharacterized protein LOC101299979 isoform X1 \\ 0.00E+00 \\ 66.75 %
TRINITY_DN2217_c0_g1	FvH4_6g11660.1	0.43025	13.6143	13.184	31.6426	1.37762e-06	0.00776886	putative leucine-rich repeat-containing, plant-type, leucine-rich repeat domain, L \\ 0.00E+00 \\ 76.06 % \\ GO:0016020-IEA;GO:0016021-IEA \\ membrane-IEA;integral component of membrane-IEA \\ GO:0016021 \\ integral component of membrane		Leucine-rich repeat	TRINITY_DN3017_c0_g1	FvH4_5g11930.1	2.73425	57.8032	55.069	21.1404	2.16651e-05	0.0317827	transcription factor MYB108-like \\ 6.10E-118 \\ 63.74 % \\ GO:0004869-IEA;GO:0030414-IEA;GO:0010951-IEA;GO:0010466-IEA \\ cysteine-type endopeptidase inhibitor activity-IEA;peptidase inhibitor activity-IEA;negative regulation of endopeptidase activity-IE	transcription factor MYB, plant	SANT/Myb domain
TRINITY_DN754_c1_g2	FvH4_4g24640.1	0.60075	18.5633	17.9625	30.9001	3.88904e-05	0.0318079	geraniol 8-hydroxylase-like \\ 3.40E-66 \\ 86.88 % \\ GO:0003735-IEA;GO:0005840-IEA;GO:0006412-IEA;GO:0005622-IEA \\ structural constituent of ribosome-IEA;ribosome-IEA;translation-IEA;intracellular-IEA \\ GO:0003735;GO:0005840;GO:0006412 \\ structural co		Cytochrome P450	TRINITY_DN1758_c1_g1	FvH4_6g39430.1	0.27675	5.8005	5.52375	20.9593	0.018247	0.942389	putative UDP-glucose flavonoid 3-O-glucosyltransferase 3 \\ 0.00E+00 \\ 83.70 % \\ GO:0016757-IEA;GO:0016758-IEA;GO:0102360-IEA;GO:0102425-IEA;GO:0047893-IEA;GO:0016740-IEA \\ transferase activity, transferring glycosyl groups-IEA;transferase activity, tr		UDP-glucuronosyl/UDP-glucosyltransferase
TRINITY_DN33408_c0_g1	FvH4_3g31680.1	0.10325	3.08675	2.9835	29.8959	0.00022551	0.0845537	alpha carbonic anhydrase 7	carbonic anhydrase [EC:4.2.1.1]	Alpha carbonic anhydrase	TRINITY_DN230619_c0_g1	FvH4_7g30570.1	0.20475	4.229	4.02425	20.6545	4.51592e-06	0.0172412	late embryogenesis abundant protein At1g64065-like \\ 1.50E-89 \\ 87.52 % \\ GO:0005509-IEA;GO:0009523-IEA;GO:0009654-IEA;GO:0015979-IEA;GO:0019898-IEA \\ calcium ion binding-IEA;photosystem II-IEA;photosystem II oxygen evolving complex-IEA;photosynthesis		Late embryogenesis abundant protein, LEA-14
TRINITY_DN172294_c0_g1	FvH4_4g02610.1	0.05375	1.6025	1.54875	29.814	0.0220205	1	transcription factor bHLH92 \\ 4.90E-131 \\ 82.40 % \\ GO:0016192-IEA;GO:0016020-IEA;GO:0016021-IEA;GO:0005622-IEA;GO:0006886-IEA \\ vesicle-mediated transport-IEA;membrane-IEA;integral component of membrane-IEA;intracellular-IEA;intracellular protein tra		Myc-type, basic helix-loop-helix (bHLH) domain	TRINITY_DN754_c1_g2	FvH4_4g24640.1	0.9085	18.5633	17.6547	20.4329	4.64289e-05	0.0441462	geraniol 8-hydroxylase-like \\ 3.40E-66 \\ 86.88 % \\ GO:0003735-IEA;GO:0005840-IEA;GO:0006412-IEA;GO:0005622-IEA \\ structural constituent of ribosome-IEA;ribosome-IEA;translation-IEA;intracellular-IEA \\ GO:0003735;GO:0005840;GO:0006412 \\ structural co		Cytochrome P450
TRINITY_DN608_c0_g1	FvH4_6g39410.1	3.81975	113.169	109.35	29.6275	0.0070492	0.539674	putative UDP-glucose flavonoid 3-O-glucosyltransferase 3 \\ 0.00E+00 \\ 72.03 % \\ GO:0003677-IEA;GO:0046982-IEA;GO:0008233-IEA;GO:0006508-IEA;GO:0005694-IEA;GO:0004252-IEA;GO:0000786-IEA;GO:0005634-IEA;GO:0016787-IEA \\ DNA binding-IEA;protein heterodime		UDP-glucuronosyl/UDP-glucosyltransferase	TRINITY_DN12554_c0_g1	FvH4_6g13620.1	0.31125	6.285	5.97375	20.1928	0.00170812	0.271298	elicitor-responsive protein 1-like \\ 2.10E-06 \\ 44.62 % \\ GO:0015698-IEA;GO:0055085-IEA;GO:0008308-IEA;GO:0098656-IEA;GO:0005741-IEA \\ inorganic anion transport-IEA;transmembrane transport-IEA;voltage-gated anion channel activity-IEA;anion transmembra		C2 domain
TRINITY_DN2039_c0_g2	FvH4_3g01760.1	2.943	87.0683	84.1253	29.5849	0.000762775	0.1614	putative methyltransferase DDB_G0268948 \\ 7.20E-05 \\ 86.92 %		Methyltransferase type 11	TRINITY_DN1848_c0_g3	FvH4_4g35100.1	0.663	13.1645	12.5015	19.856	0.00305462	0.367305	IAA-amino acid hydrolase ILR1-like 1 \\ 0.00E+00 \\ 87.29 % \\ GO:0016787-IEA \\ hydrolase activity-IEA \\ GO:0016787 \\ hydrolase activity	IAA-amino acid hydrolase [EC:3.5.1.-]	Peptidase M20
TRINITY_DN9803_c0_g2	FvH4_3g10290.1	0.33	9.61125	9.28125	29.125	1.56737e-07	0.00360102	putative wall-associated receptor kinase-like 16 \\ 0.00E+00 \\ 81.57 % \\ GO:0016020-IEA;GO:0016021-IEA;GO:0005509-IEA;GO:0004672-IEA;GO:0016740-IEA;GO:0030247-IEA;GO:0005524-IEA;GO:0006468-IEA \\ membrane-IEA;integral component of membrane-IEA;calcium i		EGF-type aspartate/asparagine hydroxylation site	TRINITY_DN5321_c0_g2	FvH4_6g05210.1	0.23525	4.57825	4.343	19.4612	2.37889e-08	0.00183217	protein DMP10-like		Protein DMP
TRINITY_DN6923_c0_g1	FvH4_5g03330.1	5.23125	150.688	145.456	28.8053	0.000858644	0.171768	late embryogenesis abundant protein At1g64065-like \\ 2.40E-14 \\ 44.51 %		Late embryogenesis abundant protein, LEA-14	TRINITY_DN324379_c0_g1	FvH4_6g10190.1	0.08425	1.63675	1.5525	19.4273	0.0103702	0.700208	flotillin-like protein 4 \\ 0.00E+00 \\ 88.20 % \\ GO:0016740-IEA \\ transferase activity-IEA \\ GO:0016740 \\ transferase activity	flotillin	Band 7 domain
TRINITY_DN542_c3_g1	FvH4_3g37310.1	0.14375	4.124	3.98025	28.6887	3.64021e-05	0.0303913	UDP-glucose iridoid glucosyltransferase-like \\ 6.60E-164 \\ 72.68 % \\ GO:0003677-IEA;GO:0003700-IEA;GO:0006351-IEA;GO:0006355-IEA;GO:0005634-IEA \\ DNA binding-IEA;DNA-binding transcription factor activity-IEA;transcription, DNA-templated-IEA;regulation		UDP-glucuronosyl/UDP-glucosyltransferase	TRINITY_DN6923_c0_g1	FvH4_5g03330.1	7.86575	150.688	142.822	19.1574	0.000948045	0.198398	late embryogenesis abundant protein At1g64065-like \\ 2.40E-14 \\ 44.51 %		Late embryogenesis abundant protein, LEA-14
TRINITY_DN9737_c0_g2	FvH4_1g00290.1	0.44375	12.7145	12.2708	28.6524	5.19698e-05	0.037583	polygalacturonase-like	polygalacturonase [EC:3.2.1.15]	Glycoside hydrolase, family 28	TRINITY_DN7996_c1_g1	FvH4_1g08540.1	2.515	48.1553	45.6403	19.1472	0.0118774	0.751118	auxin-binding protein ABP19a \\ 1.50E-79 \\ 77.89 % \\ GO:0006979-IEA;GO:0004601-IEA;GO:0016491-IEA;GO:0046872-IEA;GO:0004096-IEA;GO:0020037-IEA;GO:0055114-IEA;GO:0098869-IEA;GO:0042744-IEA \\ response to oxidative stress-IEA;peroxidase activity-IEA;oxido		Germin
TRINITY_DN8595_c0_g3	FvH4_3g32960.1	0.039	1.117	1.078	28.641	6.4697e-05	0.0425881	glutamate receptor 2.7-like \\ 0.00E+00 \\ 73.51 % \\ GO:0003856-IEA;GO:0004713-IEA;GO:0009073-IEA;GO:0016491-IEA;GO:0055114-IEA;GO:0016310-IEA;GO:0004672-IEA;GO:0016301-IEA;GO:0005524-IEA;GO:0018108-IEA;GO:0006468-IEA \\ 3-dehydroquinate synthase activit	glutamate receptor, ionotropic, plant	Ionotropic glutamate receptor	TRINITY_DN6531_c0_g1	FvH4_1g09240.1	0.859	16.0475	15.1885	18.6816	8.96912e-05	0.0598855	probable flavin-containing monooxygenase 1 \\ 0.00E+00 \\ 89.65 % \\ GO:0016491-IEA;GO:0050660-IEA;GO:0050661-IEA;GO:0055114-IEA;GO:0004497-IEA;GO:0004499-IEA \\ oxidoreductase activity-IEA;flavin adenine dinucleotide binding-IEA;NADP binding-IEA;oxidatio	dimethylaniline monooxygenase (N-oxide forming) [EC:1.14.13.8]	Flavin monooxygenase FMO
TRINITY_DN245886_c0_g1	FvH4_1g16190.1	0.11325	3.13425	3.021	27.6755	0.00125057	0.212032	proteinase inhibitor-like		Proteinase inhibitor I13, potato inhibitor I	TRINITY_DN198_c1_g4	FvH4_6g49810.1	0.799	14.777	13.978	18.4944	0.000509389	0.14735	probable galacturonosyltransferase-like 10		Glycosyl transferase, family 8
TRINITY_DN6035_c0_g1	FvH4_2g22110.1	0.103	2.806	2.703	27.2427	1.18368e-05	0.0201682	---NA--- \\ 5.30E-45 \\ 74.85 % \\ GO:0003735-IEA;GO:0005840-IEA;GO:0006412-IEA;GO:0005622-IEA \\ structural constituent of ribosome-IEA;ribosome-IEA;translation-IEA;intracellular-IEA \\ GO:0005622 \\ intracellular			TRINITY_DN2577_c0_g1	FvH4_6g39680.1	2.0995	38.23	36.1305	18.2091	0.0136557	0.812929	putative cysteine-rich transmembrane CYSTM domain-containing protein \\ 5.50E-165 \\ 93.27 % \\ GO:0006021-IEA;GO:0008654-IEA;GO:0004512-IEA \\ inositol biosynthetic process-IEA;phospholipid biosynthetic process-IEA;inositol-3-phosphate synthase activity-		Cysteine-rich transmembrane CYSTM domain
TRINITY_DN1439_c1_g1	FvH4_1g21540.1	0.97025	26.3583	25.388	27.1665	7.55428e-05	0.0461843	L-ascorbate oxidase-like \\ 0.00E+00 \\ 89.28 % \\ GO:0016491-IEA;GO:0046872-IEA;GO:0005507-IEA;GO:0055114-IEA;GO:0005576-IEA;GO:0016722-IBA \\ oxidoreductase activity-IEA;metal ion binding-IEA;copper ion binding-IEA;oxidation-reduction process-IEA;extrac		Multicopper oxidase, type 1	TRINITY_DN609_c1_g1	FvH4_4g04180.1	1.99775	35.5932	33.5955	17.8167	0.00156478	0.259313	cyclic nucleotide-gated ion channel 1-like \\ 0.00E+00 \\ 63.79 % \\ GO:0055085-IEA;GO:0016020-IEA;GO:0016021-IEA;GO:0034220-IEA;GO:0006811-IEA;GO:0005216-IEA \\ transmembrane transport-IEA;membrane-IEA;integral component of membrane-IEA;ion transmembrane	cyclic nucleotide gated channel, plant	Cyclic nucleotide-binding domain
TRINITY_DN1298_c5_g1	FvH4_3g20150.1	0.10675	2.7705	2.66375	25.9532	0.00328293	0.355865	---NA---			TRINITY_DN6740_c0_g1	FvH4_1g02890.1	11.0512	194.634	183.583	17.612	0.000465541	0.140609	blue copper protein \\ 2.40E-148 \\ 69.94 % \\ GO:0016020-IEA;GO:0016021-IEA;GO:0009055-IEA;GO:0022900-IEA \\ membrane-IEA;integral component of membrane-IEA;electron transfer activity-IEA;electron transport chain-IEA \\ GO:0009055;GO:0022900 \\ electron		Phytocyanin domain
TRINITY_DN2969_c0_g1	FvH4_4g30920.1	0.396	10.2695	9.8735	25.9331	5.01525e-07	0.00569332	phosphate transporter PHO1 homolog 3-like \\ 0.00E+00 \\ 89.07 % \\ GO:0016020-IEA;GO:0016021-IEA \\ membrane-IEA;integral component of membrane-IEA \\ GO:0016021 \\ integral component of membrane		SPX domain	TRINITY_DN146800_c1_g1	FvH4_2g28100.1	0.112	1.967	1.855	17.5625	8.58274e-05	0.0594177	hypothetical protein RchiOBHm_Chr6g0297031 \\ 7.50E-56 \\ 94.49 % \\ GO:0007165-IEA;GO:0007186-IEA \\ signal transduction-IEA;G protein-coupled receptor signaling pathway-IEA \\ GO:0007186 \\ G protein-coupled receptor signaling pathway
TRINITY_DN1315_c0_g1	FvH4_5g36720.1	0.40225	10.3308	9.9285	25.6824	0.0259305	1	plant cysteine oxidase 1-like \\ 0.00E+00 \\ 84.62 % \\ GO:0016757-IEA;GO:0016758-IEA;GO:0016740-IEA;GO:0102241-IEA \\ transferase activity, transferring glycosyl groups-IEA;transferase activity, transferring hexosyl groups-IEA;transferase activity-IEA;so	cysteamine dioxygenase [EC:1.13.11.19]	RmlC-like cupin domain superfamily	TRINITY_DN3537_c0_g1	FvH4_7g16150.1	7.9585	139.386	131.428	17.5141	9.04077e-07	0.00925697	probable WRKY transcription factor 46 \\ 1.10E-124 \\ 80.90 % \\ GO:0003677-IEA;GO:0003700-IEA;GO:0006355-IEA;GO:0043565-IEA;GO:0005634-IEA \\ DNA binding-IEA;DNA-binding transcription factor activity-IEA;regulation of transcription, DNA-templated-IEA;seq		WRKY domain
TRINITY_DN2213_c0_g2	FvH4_1g07710.1	0.09875	2.521	2.42225	25.5291	5.43938e-05	0.038522	putative transcription factor bHLH041 isoform X1 \\ 0.00E+00 \\ 76.14 % \\ GO:0046983-IEA;GO:0016020-IEA;GO:0016021-IEA \\ protein dimerization activity-IEA;membrane-IEA;integral component of membrane-IEA \\ GO:0016020;GO:0046983 \\ membrane;protein dimer		Myc-type, basic helix-loop-helix (bHLH) domain	TRINITY_DN6926_c0_g1	FvH4_2g21550.1	0.511	8.843	8.332	17.3053	0.00211163	0.302854	ethylene-responsive transcription factor 1B-like \\ 1.70E-170 \\ 62.36 % \\ GO:0003677-IEA;GO:0007165-IEA;GO:0043531-IEA \\ DNA binding-IEA;signal transduction-IEA;ADP binding-IEA	ethylene-responsive transcription factor 1	AP2/ERF domain
TRINITY_DN22410_c0_g1	FvH4_4g02960.1	0.984	24.8877	23.9037	25.2924	0.00530735	0.461744	hypothetical protein RchiOBHm_Chr4g0391021 \\ 2.50E-08 \\ 90.62 % \\ GO:0018024-IEA;GO:0008168-IEA;GO:0016740-IEA;GO:0034968-IEA;GO:0032259-IEA;GO:0005634-IEA \\ histone-lysine N-methyltransferase activity-IEA;methyltransferase activity-IEA;transferase ac			TRINITY_DN10612_c0_g1	FvH4_1g07830.1	1.97825	34.174	32.1957	17.2749	5.8753e-07	0.00822729	IQ domain-containing protein IQM1-like \\ 0.00E+00 \\ 80.69 %
TRINITY_DN14210_c0_g1	FvH4_7g15780.1	14.8402	373.544	358.703	25.171	0.000283475	0.0957566	probable inactive 2-oxoglutarate-dependent dioxygenase AOP2 \\ 7.70E-165 \\ 91.82 % \\ GO:0051213-IEA;GO:0016491-IEA;GO:0046872-IEA;GO:0055114-IEA \\ dioxygenase activity-IEA;oxidoreductase activity-IEA;metal ion binding-IEA;oxidation-reduction process-IE		Oxoglutarate/iron-dependent dioxygenase	TRINITY_DN235892_c0_g1	FvH4_4g17880.1	3.80025	64.3582	60.558	16.9353	0.0078557	0.600933	protein SRC2-like \\ 0.00E+00 \\ 93.47 % \\ GO:0045735-IEA \\ nutrient reservoir activity-IEA \\ GO:0045735 \\ nutrient reservoir activity		C2 domain
TRINITY_DN23992_c0_g1	FvH4_5g35590.1	1.8195	43.4395	41.62	23.8744	0.00101586	0.189555	probable pectinesterase/pectinesterase inhibitor 20 \\ 0.00E+00 \\ 83.63 % \\ GO:0004857-IEA;GO:0005618-IEA;GO:0043086-IEA;GO:0045330-IEA;GO:0030599-IEA;GO:0042545-IEA;GO:0045490-IEA;GO:0016787-IEA \\ enzyme inhibitor activity-IEA;cell wall-IEA;negative r	pectinesterase [EC:3.1.1.11]	Pectinesterase, catalytic	TRINITY_DN6775_c0_g1	FvH4_4g29200.1	0.31	5.13025	4.82025	16.5492	1.0819e-05	0.0232607	hypothetical protein RchiOBHm_Chr4g0437271 \\ 3.40E-13 \\ 85.46 % \\ GO:0005506-IEA;GO:0016705-IEA;GO:0016020-IEA;GO:0016021-IEA;GO:0020037-IEA;GO:0055114-IEA;GO:0005773-IBA \\ iron ion binding-IEA;oxidoreductase activity, acting on paired donors, with in
TRINITY_DN983_c0_g2	FvH4_3g14270.1	0.1475	3.48225	3.33475	23.6085	2.76753e-05	0.0260732	---NA---			TRINITY_DN2217_c0_g1	FvH4_6g11660.1	0.82725	13.6143	12.787	16.4572	1.78047e-06	0.0126436	putative leucine-rich repeat-containing, plant-type, leucine-rich repeat domain, L \\ 0.00E+00 \\ 76.06 % \\ GO:0016020-IEA;GO:0016021-IEA \\ membrane-IEA;integral component of membrane-IEA \\ GO:0016021 \\ integral component of membrane		Leucine-rich repeat
TRINITY_DN503_c0_g1	FvH4_3g09340.1	0.38675	9.02375	8.637	23.3323	0.00255124	0.312942	heat stress transcription factor B-2a-like \\ 3.50E-100 \\ 77.59 % \\ GO:0000166-IEA;GO:0046177-IEA;GO:0046177-IBA;GO:0046316-IEA;GO:0046316-IBA;GO:0016310-IEA;GO:0016740-IEA;GO:0016301-IEA;GO:0005975-IEA;GO:0005524-IEA \\ nucleotide binding-IEA;D-glucona	heat shock transcription factor, other eukaryote	Heat shock factor (HSF)-type, DNA-binding	TRINITY_DN3908_c0_g1	FvH4_4g01680.1	0.673	10.989	10.316	16.3284	2.79239e-05	0.0357312	putative calcium-transporting ATPase 13, plasma membrane-type \\ 0.00E+00 \\ 91.65 % \\ GO:0000166-IEA;GO:0016020-IEA;GO:0006816-IEA;GO:0016021-IEA;GO:0005388-IEA;GO:0070588-IEA;GO:0006811-IEA;GO:0016787-IEA;GO:0005524-IEA;GO:0099132-IEA \\ nucleotide bin	Ca2+-transporting ATPase [EC:3.6.3.8]	P-type ATPase
TRINITY_DN10612_c0_g1	FvH4_1g07830.1	1.48025	34.174	32.6938	23.0866	4.43205e-07	0.00566428	IQ domain-containing protein IQM1-like \\ 0.00E+00 \\ 80.69 %			TRINITY_DN4620_c0_g1	FvH4_7g28170.1	0.10925	1.7735	1.66425	16.2334	0.000629129	0.159782	nuclear polyadenylated RNA-binding protein 3-like \\ 2.60E-06 \\ 83.98 %
TRINITY_DN3017_c0_g1	FvH4_5g11930.1	2.5105	57.8032	55.2927	23.0246	2.13019e-05	0.0225278	transcription factor MYB108-like \\ 6.10E-118 \\ 63.74 % \\ GO:0004869-IEA;GO:0030414-IEA;GO:0010951-IEA;GO:0010466-IEA \\ cysteine-type endopeptidase inhibitor activity-IEA;peptidase inhibitor activity-IEA;negative regulation of endopeptidase activity-IE	transcription factor MYB, plant	SANT/Myb domain	TRINITY_DN10044_c0_g1	FvH4_3g02270.1	0.103	1.671	1.568	16.2233	0.0128949	0.786642	PREDICTED: uncharacterized protein LOC101291313 \\ 5.90E-05 \\ 57.34 % \\ GO:0008270-IEA;GO:0003676-IEA \\ zinc ion binding-IEA;nucleic acid binding-IEA
TRINITY_DN1696_c0_g2	FvH4_6g32100.1	0.4325	9.854	9.4215	22.7838	2.79206e-05	0.0261444	ankyrin repeat-containing protein At5g02620-like \\ 1.50E-179 \\ 76.38 % \\ GO:0008270-IEA;GO:0006355-IEA \\ zinc ion binding-IEA;regulation of transcription, DNA-templated-IEA \\ GO:0006355 \\ regulation of transcription, DNA-templated		Ankyrin repeat	TRINITY_DN5482_c0_g1	FvH4_6g37430.1	0.35975	5.66875	5.309	15.7575	2.15777e-05	0.0317827	receptor-like protein kinase \\ 0.00E+00 \\ 78.80 % \\ GO:0000166-IEA;GO:0016020-IEA;GO:0016021-IEA;GO:0016310-IEA;GO:0016740-IEA;GO:0004672-IEA;GO:0016301-IEA;GO:0004674-IEA;GO:0005524-IEA;GO:0006468-IEA \\ nucleotide binding-IEA;membrane-IEA;integral co		Protein kinase domain
TRINITY_DN6740_c0_g1	FvH4_1g02890.1	8.8505	194.634	185.784	21.9913	0.000433246	0.121006	blue copper protein \\ 2.40E-148 \\ 69.94 % \\ GO:0016020-IEA;GO:0016021-IEA;GO:0009055-IEA;GO:0022900-IEA \\ membrane-IEA;integral component of membrane-IEA;electron transfer activity-IEA;electron transport chain-IEA \\ GO:0009055;GO:0022900 \\ electron		Phytocyanin domain	TRINITY_DN6807_c1_g1	FvH4_7g33270.1	0.8745	13.5717	12.6972	15.5194	0.000138633	0.0746657	PREDICTED: uncharacterized protein LOC101292349 \\ 4.70E-09 \\ 83.47 % \\ GO:0055085-IEA;GO:0016020-IEA;GO:0016021-IEA;GO:0022857-IEA \\ transmembrane transport-IEA;membrane-IEA;integral component of membrane-IEA;transmembrane transporter activity-IEA		Protein of unknown function DUF599
TRINITY_DN7453_c1_g1	FvH4_6g48230.1	0.58375	12.587	12.0032	21.5623	8.54849e-07	0.00658383	pentatricopeptide repeat-containing protein At5g39680 \\ 0.00E+00 \\ 88.35 % \\ GO:0008270-IEA \\ zinc ion binding-IEA \\ GO:0008270 \\ zinc ion binding		Pentatricopeptide repeat	TRINITY_DN1949_c1_g1	FvH4_3g18370.1	19.5655	301.323	281.758	15.4007	0.00276019	0.350541	epidermis-specific secreted glycoprotein EP1-like \\ 0.00E+00 \\ 86.95 % \\ GO:0030246-IEA \\ carbohydrate binding-IEA \\ GO:0030246 \\ carbohydrate binding		Bulb-type lectin domain
TRINITY_DN8530_c0_g1	FvH4_3g15320.1	0.271	5.73175	5.46075	21.1504	5.5511e-06	0.0157496	transcription factor MYB63 \\ 0.00E+00 \\ 61.65 % \\ GO:0003677-IEA;GO:0030154-IBA;GO:0044212-IBA;GO:0043565-IBA;GO:0005634-IBA \\ DNA binding-IEA;cell differentiation-IBA;transcription regulatory region DNA binding-IBA;sequence-specific DNA binding-IBA;n	transcription factor MYB, plant	SANT/Myb domain	TRINITY_DN10620_c0_g1	FvH4_7g00010.1	1.68725	24.7997	23.1125	14.6983	0.00185178	0.282274	Transcription termination factor like \\ 0.00E+00 \\ 82.08 % \\ GO:0030448-IBA;GO:0005946-IBA;GO:0005737-IBA;GO:0031505-IBA;GO:0003824-IEA;GO:0003825-IBA;GO:0004805-IBA;GO:0070413-IBA;GO:0016740-IEA;GO:0016311-IEA;GO:0034605-IBA;GO:0043936-IBA;GO:0005992-
TRINITY_DN6944_c0_g1	FvH4_7g10080.1	0.30825	6.50825	6.2	21.1135	0.000279274	0.095278	ethylene-responsive transcription factor 13-like \\ 2.10E-125 \\ 94.15 % \\ GO:0016491-IEA;GO:0016020-IEA;GO:0016021-IEA;GO:0055114-IEA;GO:0009522-IEA;GO:0015979-IEA;GO:0009538-IEA \\ oxidoreductase activity-IEA;membrane-IEA;integral component of membrane		AP2/ERF domain	TRINITY_DN98392_c0_g2	FvH4_4g05930.1	0.9885	14.5263	13.5378	14.6952	3.84611e-06	0.0155904	ubiquinol oxidase, mitochondrial-like \\ 0.00E+00 \\ 83.77 % \\ GO:0003824-IEA \\ catalytic activity-IEA \\ GO:0003824 \\ catalytic activity	ubiquinol oxidase [EC:1.10.3.11]	Alternative oxidase
TRINITY_DN3537_c0_g1	FvH4_7g16150.1	6.65925	139.386	132.727	20.9312	9.28236e-07	0.00673267	probable WRKY transcription factor 46 \\ 1.10E-124 \\ 80.90 % \\ GO:0003677-IEA;GO:0003700-IEA;GO:0006355-IEA;GO:0043565-IEA;GO:0005634-IEA \\ DNA binding-IEA;DNA-binding transcription factor activity-IEA;regulation of transcription, DNA-templated-IEA;seq		WRKY domain	TRINITY_DN23432_c0_g1	FvH4_3g41220.1	0.51225	7.34425	6.832	14.3372	0.00474867	0.463097	cytochrome P450 714C2-like \\ 0.00E+00 \\ 89.38 % \\ GO:0005506-IEA;GO:0016491-IEA;GO:0046872-IEA;GO:0016705-IEA;GO:0016020-IEA;GO:0016021-IEA;GO:0020037-IEA;GO:0055114-IEA;GO:0004497-IEA \\ iron ion binding-IEA;oxidoreductase activity-IEA;metal ion bindi		Cytochrome P450
TRINITY_DN2577_c0_g1	FvH4_6g39680.1	1.83525	38.23	36.3947	20.8309	0.0132613	0.768655	putative cysteine-rich transmembrane CYSTM domain-containing protein \\ 5.50E-165 \\ 93.27 % \\ GO:0006021-IEA;GO:0008654-IEA;GO:0004512-IEA \\ inositol biosynthetic process-IEA;phospholipid biosynthetic process-IEA;inositol-3-phosphate synthase activity-		Cysteine-rich transmembrane CYSTM domain	TRINITY_DN1920_c0_g1	FvH4_1g27450.1	2.2505	31.7408	29.4903	14.1039	0.00128208	0.234265	butyrate--CoA ligase AAE11, peroxisomal-like \\ 0.00E+00 \\ 89.38 % \\ GO:0016207-IEA;GO:0003824-IEA;GO:0016874-IEA \\ 4-coumarate-CoA ligase activity-IEA;catalytic activity-IEA;ligase activity-IEA \\ GO:0016207 \\ 4-coumarate-CoA ligase activity		AMP-dependent synthetase/ligase
TRINITY_DN10044_c0_g1	FvH4_3g02270.1	0.08025	1.671	1.59075	20.8224	0.0117582	0.717157	PREDICTED: uncharacterized protein LOC101291313 \\ 5.90E-05 \\ 57.34 % \\ GO:0008270-IEA;GO:0003676-IEA \\ zinc ion binding-IEA;nucleic acid binding-IEA			TRINITY_DN7017_c0_g1	FvH4_3g05370.1	0.58275	7.9055	7.32275	13.5659	0.0073316	0.583855	protein TIFY 5A-like \\ 0.00E+00 \\ 68.50 % \\ GO:0003677-IEA;GO:0044212-IBA;GO:0030154-IBA;GO:0043565-IBA;GO:0005634-IBA \\ DNA binding-IEA;transcription regulatory region DNA binding-IBA;cell differentiation-IBA;sequence-specific DNA binding-IBA;nucleus		Tify domain
TRINITY_DN98392_c0_g2	FvH4_4g05930.1	0.703	14.5263	13.8233	20.6632	2.99915e-06	0.0109994	ubiquinol oxidase, mitochondrial-like \\ 0.00E+00 \\ 83.77 % \\ GO:0003824-IEA \\ catalytic activity-IEA \\ GO:0003824 \\ catalytic activity	ubiquinol oxidase [EC:1.10.3.11]	Alternative oxidase	TRINITY_DN211460_c0_g1	FvH4_7g04040.1	0.1105	1.47475	1.36425	13.3462	0.00139942	0.245523	probable carboxylesterase 15 \\ 3.80E-48 \\ 85.18 %		Alpha/beta hydrolase fold-3
TRINITY_DN4317_c0_g1	FvH4_3g21380.1	18.976	386.346	367.37	20.3597	5.54419e-07	0.00569332	cytochrome P450 71A25-like \\ 0.00E+00 \\ 79.25 % \\ GO:0016757-IEA;GO:0016758-IEA;GO:0016020-IEA;GO:0016021-IEA;GO:0016740-IEA \\ transferase activity, transferring glycosyl groups-IEA;transferase activity, transferring hexosyl groups-IEA;membrane-IEA;in		Cytochrome P450	TRINITY_DN7613_c0_g1	FvH4_1g26490.1	5.4835	72.6397	67.1562	13.247	0.014645	0.842362	putative transcription factor WD40-like family \\ 0.00E+00 \\ 84.75 % \\ GO:0008233-IEA;GO:0006508-IEA \\ peptidase activity-IEA;proteolysis-IEA \\ GO:0006508;GO:0008233 \\ proteolysis;peptidase activity		WD40-like Beta Propeller
TRINITY_DN8912_c0_g1	FvH4_2g29520.1	0.392	7.8155	7.4235	19.9375	4.89696e-05	0.0366167	putative UPF0481 protein At3g02645 \\ 0.00E+00 \\ 73.17 % \\ GO:0016020-IEA;GO:0016021-IEA \\ membrane-IEA;integral component of membrane-IEA \\ GO:0016021 \\ integral component of membrane		Protein of unknown function DUF247, plant	TRINITY_DN1498_c2_g1	FvH4_1g23740.1	1.88375	24.6275	22.7437	13.0737	3.00183e-05	0.0362253	FAD-dependent urate hydroxylase-like \\ 9.10E-42 \\ 70.18 % \\ GO:0031047-IEA;GO:0003676-IEA \\ gene silencing by RNA-IEA;nucleic acid binding-IEA		FAD-binding domain
TRINITY_DN17407_c0_g2	FvH4_2g23400.1	0.05975	1.17575	1.116	19.6778	0.00511548	0.453635	ent-copalyl diphosphate synthase, chloroplastic-like \\ 0.00E+00 \\ 79.82 % \\ GO:0000287-IEA;GO:0009905-IEA;GO:0016829-IEA;GO:0010333-IEA;GO:0016853-IEA \\ magnesium ion binding-IEA;ent-copalyl diphosphate synthase activity-IEA;lyase activity-IEA;terpene	ent-copalyl diphosphate synthase [EC:5.5.1.13]	Terpene synthase, N-terminal domain	TRINITY_DN510_c1_g1	FvH4_2g33720.1	0.46425	6.0185	5.55425	12.9639	0.000122453	0.0702052	putative transcription factor MYC/MYB \\ 0.00E+00 \\ 84.72 %		Transcription factor MYC/MYB N-terminal
TRINITY_DN928_c2_g1	FvH4_3g23100.1	0.07675	1.49075	1.414	19.4235	0.000261335	0.0922215	L-type lectin-domain containing receptor kinase IX.1-like \\ 0.00E+00 \\ 81.14 % \\ GO:0016020-IEA;GO:0016021-IEA;GO:0016740-IEA;GO:0004672-IEA;GO:0030246-IEA;GO:0005524-IEA;GO:0006468-IEA \\ membrane-IEA;integral component of membrane-IEA;transferase act		Protein kinase domain	TRINITY_DN4317_c0_g1	FvH4_3g21380.1	29.9975	386.346	356.348	12.8793	8.59626e-07	0.00925697	cytochrome P450 71A25-like \\ 0.00E+00 \\ 79.25 % \\ GO:0016757-IEA;GO:0016758-IEA;GO:0016020-IEA;GO:0016021-IEA;GO:0016740-IEA \\ transferase activity, transferring glycosyl groups-IEA;transferase activity, transferring hexosyl groups-IEA;membrane-IEA;in		Cytochrome P450
TRINITY_DN22418_c0_g1	FvH4_6g29770.1	1.0345	19.6713	18.6367	19.0152	4.38253e-05	0.0339228	cucumber peeling cupredoxin-like		Phytocyanin domain	TRINITY_DN22410_c0_g1	FvH4_4g02960.1	1.94675	24.8877	22.941	12.7843	0.00647559	0.546854	hypothetical protein RchiOBHm_Chr4g0391021 \\ 2.50E-08 \\ 90.62 % \\ GO:0018024-IEA;GO:0008168-IEA;GO:0016740-IEA;GO:0034968-IEA;GO:0032259-IEA;GO:0005634-IEA \\ histone-lysine N-methyltransferase activity-IEA;methyltransferase activity-IEA;transferase ac
TRINITY_DN18066_c0_g1	FvH4_1g05060.1	0.244	4.583	4.339	18.7828	0.000837814	0.169866	5-methyltetrahydropteroyltriglutamate--homocysteine methyltransferase			TRINITY_DN28961_c0_g1	FvH4_4g14250.1	1.9535	24.698	22.7445	12.6429	0.00180368	0.278248	---NA--- \\ 0.00E+00 \\ 97.42 %
TRINITY_DN6775_c0_g1	FvH4_4g29200.1	0.2755	5.13025	4.85475	18.6216	9.91864e-06	0.019515	hypothetical protein RchiOBHm_Chr4g0437271 \\ 3.40E-13 \\ 85.46 % \\ GO:0005506-IEA;GO:0016705-IEA;GO:0016020-IEA;GO:0016021-IEA;GO:0020037-IEA;GO:0055114-IEA;GO:0005773-IBA \\ iron ion binding-IEA;oxidoreductase activity, acting on paired donors, with in			TRINITY_DN13913_c0_g1	FvH4_6g10200.1	0.31825	4.008	3.68975	12.5939	4.30866e-05	0.0427192	Methyltransferase-related protein
TRINITY_DN7515_c2_g3	FvH4_4g24790.1	0.55875	10.149	9.59025	18.1638	0.003743	0.381509	vinorine synthase-like \\ 0.00E+00 \\ 83.38 % \\ GO:0016746-IEA;GO:0016747-IEA;GO:0016740-IEA;GO:0050636-IEA \\ transferase activity, transferring acyl groups-IEA;transferase activity, transferring acyl groups other than amino-acyl groups-IEA;transferase		Transferase	TRINITY_DN2295_c0_g2	FvH4_4g02880.1	0.97875	12.3185	11.3398	12.586	0.0385617	1	glu S.griseus protease inhibitor-like		Proteinase inhibitor I13, potato inhibitor I
TRINITY_DN324379_c0_g1	FvH4_6g10190.1	0.091	1.63675	1.54575	17.9863	0.0107832	0.683651	flotillin-like protein 4 \\ 0.00E+00 \\ 88.20 % \\ GO:0016740-IEA \\ transferase activity-IEA \\ GO:0016740 \\ transferase activity	flotillin	Band 7 domain	TRINITY_DN6051_c0_g1	FvH4_4g23480.1	5.35625	67.4045	62.0482	12.5843	5.84273e-06	0.0175255	probable WRKY transcription factor 75 \\ 3.40E-57 \\ 96.31 % \\ GO:0003677-IEA;GO:0003700-IEA;GO:0006355-IEA;GO:0043565-IEA;GO:0005634-IEA \\ DNA binding-IEA;DNA-binding transcription factor activity-IEA;regulation of transcription, DNA-templated-IEA;sequ		WRKY domain
TRINITY_DN1074_c0_g3	FvH4_6g39850.1	1.3025	23.3568	22.0543	17.9322	0.000279804	0.095353	7-deoxyloganetin glucosyltransferase-like \\ 0.00E+00 \\ 85.52 % \\ GO:0016757-IEA;GO:0016758-IEA;GO:0016740-IEA \\ transferase activity, transferring glycosyl groups-IEA;transferase activity, transferring hexosyl groups-IEA;transferase activity-IEA \\ GO	7-deoxyloganetin glucosyltransferase [EC:2.4.1.324]	UDP-glucuronosyl/UDP-glucosyltransferase	TRINITY_DN6404_c0_g1	FvH4_3g43440.1	0.6	7.54825	6.94825	12.5804	2.80722e-05	0.0357312	G-type lectin S-receptor-like serine/threonine-protein kinase LECRK2 \\ 0.00E+00 \\ 81.50 % \\ GO:0000166-IEA;GO:0016020-IEA;GO:0016021-IEA;GO:0016310-IEA;GO:0004672-IEA;GO:0016740-IEA;GO:0016301-IEA;GO:0004674-IEA;GO:0005524-IEA;GO:0006468-IEA \\ nucleot		Protein kinase domain
TRINITY_DN1920_c0_g1	FvH4_1g27450.1	1.78	31.7408	29.9608	17.8319	0.00118446	0.205611	butyrate--CoA ligase AAE11, peroxisomal-like \\ 0.00E+00 \\ 89.38 % \\ GO:0016207-IEA;GO:0003824-IEA;GO:0016874-IEA \\ 4-coumarate-CoA ligase activity-IEA;catalytic activity-IEA;ligase activity-IEA \\ GO:0016207 \\ 4-coumarate-CoA ligase activity		AMP-dependent synthetase/ligase	TRINITY_DN2108_c0_g1	FvH4_5g31290.1	0.15	1.87025	1.72025	12.4683	0.0116805	0.744519	putative F-box protein At1g47790 \\ 0.00E+00 \\ 63.76 % \\ GO:0016020-IEA;GO:0016021-IEA;GO:0016874-IEA;GO:0005774-IEA \\ membrane-IEA;integral component of membrane-IEA;ligase activity-IEA;vacuolar membrane-IEA \\ GO:0016021 \\ integral component of memb
TRINITY_DN4155_c0_g1	FvH4_2g33840.1	0.3405	5.96875	5.62825	17.5294	2.26206e-05	0.0234248	putative receptor protein kinase ZmPK1 \\ 0.00E+00 \\ 81.90 % \\ GO:0000166-IEA;GO:0048544-IEA;GO:0016020-IEA;GO:0016021-IEA;GO:0016310-IEA;GO:0004672-IEA;GO:0016740-IEA;GO:0016301-IEA;GO:0004674-IEA;GO:0005524-IEA;GO:0006468-IEA \\ nucleotide binding-IEA		Protein kinase domain	TRINITY_DN4155_c0_g1	FvH4_2g33840.1	0.4825	5.96875	5.48625	12.3705	2.59568e-05	0.0343758	putative receptor protein kinase ZmPK1 \\ 0.00E+00 \\ 81.90 % \\ GO:0000166-IEA;GO:0048544-IEA;GO:0016020-IEA;GO:0016021-IEA;GO:0016310-IEA;GO:0004672-IEA;GO:0016740-IEA;GO:0016301-IEA;GO:0004674-IEA;GO:0005524-IEA;GO:0006468-IEA \\ nucleotide binding-IEA		Protein kinase domain
TRINITY_DN27253_c0_g1	FvH4_3g42060.1	0.121	2.11675	1.99575	17.4938	0.000709101	0.156741	heavy metal-associated isoprenylated plant protein 47-like			TRINITY_DN27253_c0_g1	FvH4_3g42060.1	0.17325	2.11675	1.9435	12.2179	0.000983882	0.202881	heavy metal-associated isoprenylated plant protein 47-like
TRINITY_DN28961_c0_g1	FvH4_4g14250.1	1.4195	24.698	23.2785	17.3991	0.00150584	0.236685	---NA--- \\ 0.00E+00 \\ 97.42 %			TRINITY_DN12470_c0_g1	FvH4_5g01840.1	7.45425	89.87	82.4158	12.0562	0.0108607	0.716612	osmotin-like protein osm34		Thaumatin
TRINITY_DN31853_c2_g1	FvH4_6g43220.1	0.13375	2.31275	2.179	17.2916	0.0025818	0.31475	protein DETOXIFICATION 40-like \\ 1.80E-116 \\ 81.66 % \\ GO:0003677-IEA \\ DNA binding-IEA \\ GO:0003677 \\ DNA binding		Multi antimicrobial extrusion protein	TRINITY_DN8912_c0_g1	FvH4_2g29520.1	0.652	7.8155	7.1635	11.987	6.24279e-05	0.051242	putative UPF0481 protein At3g02645 \\ 0.00E+00 \\ 73.17 % \\ GO:0016020-IEA;GO:0016021-IEA \\ membrane-IEA;integral component of membrane-IEA \\ GO:0016021 \\ integral component of membrane		Protein of unknown function DUF247, plant
TRINITY_DN4191_c0_g2	FvH4_1g20790.1	0.40725	6.73125	6.324	16.5285	0.00215295	0.286134	putative transcription factor interactor and regulator CCHC(Zn) family \\ 0.00E+00 \\ 98.83 % \\ GO:0004634-IEA;GO:0000287-IEA;GO:0046872-IEA;GO:0006096-IEA;GO:0000015-IEA \\ phosphopyruvate hydratase activity-IEA;magnesium ion binding-IEA;metal ion bindi			TRINITY_DN7139_c0_g1	FvH4_4g01640.1	1.47	17.4958	16.0258	11.9019	0.00117706	0.223895	putative calcium-transporting ATPase 13, plasma membrane-type \\ 0.00E+00 \\ 84.49 % \\ GO:0000166-IEA;GO:0016020-IEA;GO:0006816-IEA;GO:0016021-IEA;GO:0005388-IEA;GO:0070588-IEA;GO:0006811-IEA;GO:0016787-IEA;GO:0005524-IEA;GO:0099132-IEA \\ nucleotide bin	Ca2+-transporting ATPase [EC:3.6.3.8]	P-type ATPase
TRINITY_DN3908_c0_g1	FvH4_4g01680.1	0.66575	10.989	10.3233	16.5062	2.73049e-05	0.0258537	putative calcium-transporting ATPase 13, plasma membrane-type \\ 0.00E+00 \\ 91.65 % \\ GO:0000166-IEA;GO:0016020-IEA;GO:0006816-IEA;GO:0016021-IEA;GO:0005388-IEA;GO:0070588-IEA;GO:0006811-IEA;GO:0016787-IEA;GO:0005524-IEA;GO:0099132-IEA \\ nucleotide bin	Ca2+-transporting ATPase [EC:3.6.3.8]	P-type ATPase	TRINITY_DN1350_c0_g1	FvH4_7g33510.1	0.31825	3.75875	3.4405	11.8107	0.00316604	0.374276	putative endopeptidase, NLPC/P60 domain, LRAT-like domain-containing protein \\ 0.00E+00 \\ 88.81 % \\ GO:0016192-IEA;GO:0006906-IBA;GO:0046872-IEA;GO:0016491-IEA;GO:0016020-IEA;GO:0016021-IEA;GO:0016021-IBA;GO:0048278-IBA;GO:0031201-IBA;GO:0012505-IBA;GO		LRAT-like domain
TRINITY_DN15423_c0_g1	FvH4_4g24970.1	0.13	2.126	1.996	16.3538	0.020388	0.968236	RPM1-interacting protein 4-like \\ 5.40E-38 \\ 70.64 % \\ GO:0016020-IEA;GO:0016021-IEA;GO:0003950-IEA \\ membrane-IEA;integral component of membrane-IEA;NAD+ ADP-ribosyltransferase activity-IEA \\ GO:0016020 \\ membrane			TRINITY_DN2944_c0_g1	FvH4_4g19020.1	22.518	265.107	242.589	11.7731	0.000428925	0.134835	major allergen Pru ar 1-like		Bet v I/Major latex protein
TRINITY_DN7474_c0_g2	FvH4_6g22790.1	3.6385	59.1743	55.5358	16.2634	0.00373565	0.381208	polygalacturonase-inhibiting protein \\ 0.00E+00 \\ 89.73 %		Leucine-rich repeat	TRINITY_DN11008_c0_g1	FvH4_1g16150.1	1.14775	13.4355	12.2878	11.7059	3.90025e-05	0.0412904	mitogen-activated protein kinase kinase kinase 3-like		Protein kinase domain
TRINITY_DN32506_c0_g1	FvH4_3g42050.1	0.2335	3.78675	3.55325	16.2173	3.37594e-05	0.0290017	heavy metal-associated isoprenylated plant protein 47-like \\ 2.50E-93 \\ 95.38 % \\ GO:0071341-IEA;GO:0005737-IEA;GO:0005826-IEA;GO:0016460-IEA;GO:1903475-IEA;GO:0071574-IEA;GO:0005509-IEA;GO:1903479-IEA \\ medial cortical node-IEA;cytoplasm-IEA;actomyos			TRINITY_DN68_c1_g1	FvH4_5g14810.1	0.53425	6.1235	5.58925	11.4619	8.76663e-05	0.0598242	probable calcium-binding protein CML45 \\ 1.70E-124 \\ 74.38 % \\ GO:0048046-IEA;GO:0005576-IEA \\ apoplast-IEA;extracellular region-IEA \\ GO:0005576 \\ extracellular region	calmodulin	EF-hand domain
TRINITY_DN16867_c0_g1	FvH4_4g35930.1	0.468	7.53225	7.06425	16.0946	9.48108e-06	0.0190904	glutamate decarboxylase 4-like \\ 0.00E+00 \\ 91.55 % \\ GO:0030170-IEA;GO:0003824-IEA;GO:0016829-IEA;GO:0019752-IEA;GO:0004351-IEA;GO:0006536-IEA;GO:0016831-IEA \\ pyridoxal phosphate binding-IEA;catalytic activity-IEA;lyase activity-IEA;carboxylic acid	glutamate decarboxylase [EC:4.1.1.15]	Pyridoxal phosphate-dependent decarboxylase	TRINITY_DN4231_c0_g2	FvH4_7g13230.1	0.73875	8.412	7.67325	11.3868	0.000172944	0.0839038	mitogen-activated protein kinase kinase kinase ANP1 \\ 2.30E-149 \\ 71.69 % \\ GO:0023014-IBA;GO:0005737-IBA;GO:0031098-IBA;GO:0032147-IBA;GO:0016310-IEA;GO:0004672-IEA;GO:0016301-IEA;GO:0004674-IBA;GO:0005524-IEA;GO:0006468-IEA \\ signal transduction by		Protein kinase domain
TRINITY_DN235892_c0_g1	FvH4_4g17880.1	4.00925	64.3582	60.349	16.0524	0.00804466	0.578757	protein SRC2-like \\ 0.00E+00 \\ 93.47 % \\ GO:0045735-IEA \\ nutrient reservoir activity-IEA \\ GO:0045735 \\ nutrient reservoir activity		C2 domain	TRINITY_DN12127_c0_g1	FvH4_3g42100.1	0.15425	1.741	1.58675	11.2869	0.0142285	0.832728	heavy metal-associated isoprenylated plant protein 47-like
TRINITY_DN7004_c0_g1	FvH4_2g29870.1	0.214	3.384	3.17	15.8131	0.000303386	0.09954	cysteine-rich receptor-like protein kinase 26 \\ 0.00E+00 \\ 78.70 % \\ GO:0016020-IEA;GO:0016021-IEA;GO:0004672-IEA;GO:0016740-IEA;GO:0005524-IEA;GO:0006468-IEA \\ membrane-IEA;integral component of membrane-IEA;protein kinase activity-IEA;transferase ac		Protein kinase domain	TRINITY_DN990_c0_g2	FvH4_2g35060.1	0.2455	2.77075	2.52525	11.2862	0.000564536	0.152509	putative wall-associated receptor kinase-like 16 \\ 0.00E+00 \\ 80.80 % \\ GO:0000166-IEA;GO:0016020-IEA;GO:0005509-IEA;GO:0016021-IEA;GO:0016310-IEA;GO:0004672-IEA;GO:0016740-IEA;GO:0030247-IEA;GO:0016301-IEA;GO:0004674-IEA;GO:0005524-IEA;GO:0006468-IEA		EGF-type aspartate/asparagine hydroxylation site
TRINITY_DN7996_c1_g1	FvH4_1g08540.1	3.0535	48.1553	45.1018	15.7705	0.0132968	0.769844	auxin-binding protein ABP19a \\ 1.50E-79 \\ 77.89 % \\ GO:0006979-IEA;GO:0004601-IEA;GO:0016491-IEA;GO:0046872-IEA;GO:0004096-IEA;GO:0020037-IEA;GO:0055114-IEA;GO:0098869-IEA;GO:0042744-IEA \\ response to oxidative stress-IEA;peroxidase activity-IEA;oxido		Germin	TRINITY_DN15385_c0_g1	FvH4_4g18960.1	10.1023	112.869	102.767	11.1727	7.85555e-06	0.0196106	major allergen Pru ar 1-like \\ 2.20E-13 \\ 58.43 % \\ GO:0008233-IEA;GO:0006508-IEA;GO:0004252-IEA;GO:0008236-IEA;GO:0016787-IEA \\ peptidase activity-IEA;proteolysis-IEA;serine-type endopeptidase activity-IEA;serine-type peptidase activity-IEA;hydrolase		Bet v I/Major latex protein
TRINITY_DN5482_c0_g1	FvH4_6g37430.1	0.363	5.66875	5.30575	15.6164	2.17156e-05	0.0228325	receptor-like protein kinase \\ 0.00E+00 \\ 78.80 % \\ GO:0000166-IEA;GO:0016020-IEA;GO:0016021-IEA;GO:0016310-IEA;GO:0016740-IEA;GO:0004672-IEA;GO:0016301-IEA;GO:0004674-IEA;GO:0005524-IEA;GO:0006468-IEA \\ nucleotide binding-IEA;membrane-IEA;integral co		Protein kinase domain	TRINITY_DN11031_c0_g1	FvH4_1g07430.1	0.10225	1.113	1.01075	10.8851	0.0014824	0.251478	Protein SON like \\ 8.10E-140 \\ 67.93 %
TRINITY_DN24531_c0_g2	FvH4_4g03470.1	3.99375	62.1977	58.204	15.5738	1.45267e-05	0.0201682	ethylene-responsive transcription factor 1B	ethylene-responsive transcription factor 1	AP2/ERF domain	TRINITY_DN6335_c2_g1	FvH4_3g20550.1	1.42825	15.4877	14.0595	10.8439	9.47146e-05	0.0611713	CBS domain-containing protein CBSX5-like \\ 0.00E+00 \\ 68.24 %		CBS domain
TRINITY_DN10075_c0_g1	FvH4_4g33180.1	0.12125	1.87675	1.7555	15.4784	0.000169976	0.0715326	putative F-box domain, leucine-rich repeat domain, L domain-containing protein \\ 3.30E-111 \\ 56.74 %		Leucine-rich repeat domain superfamily	TRINITY_DN10829_c0_g1	FvH4_4g04740.1	0.78125	8.3635	7.58225	10.7053	0.00941212	0.663522	putative EF-hand domain pair protein \\ 8.50E-60 \\ 86.89 % \\ GO:0005504-IEA;GO:0009627-IEA \\ fatty acid binding-IEA;systemic acquired resistance-IEA \\ GO:0005504;GO:0009627 \\ fatty acid binding;systemic acquired resistance		EF-hand domain
TRINITY_DN264381_c0_g1	FvH4_3g20710.1	0.17275	2.6365	2.46375	15.2619	0.00108961	0.196647	PREDICTED: uncharacterized protein LOC105350158			TRINITY_DN18066_c0_g1	FvH4_1g05060.1	0.4305	4.583	4.1525	10.6458	0.00136304	0.241956	5-methyltetrahydropteroyltriglutamate--homocysteine methyltransferase
TRINITY_DN35309_c0_g3	FvH4_5g05180.1	0.29775	4.512	4.21425	15.1537	7.08206e-05	0.0446566	transcription factor bHLH162-like \\ 6.10E-113 \\ 56.26 % \\ GO:0003677-IEA;GO:0006355-IEA \\ DNA binding-IEA;regulation of transcription, DNA-templated-IEA		Myc-type, basic helix-loop-helix (bHLH) domain	TRINITY_DN5024_c0_g1	FvH4_3g13600.1	0.879	9.33625	8.45725	10.6214	6.22235e-05	0.051242	receptor-like protein EIX2 \\ 0.00E+00 \\ 75.02 % \\ GO:0016020-IEA;GO:0016021-IEA;GO:0016310-IEA;GO:0016740-IEA;GO:0016301-IEA;GO:0004674-IEA;GO:0006468-IEA \\ membrane-IEA;integral component of membrane-IEA;phosphorylation-IEA;transferase activity-IEA;k		Leucine-rich repeat
TRINITY_DN582_c0_g3	FvH4_3g43760.1	0.24725	3.70125	3.454	14.9697	0.000818025	0.167782	---NA--- \\ 0.00E+00 \\ 67.64 % \\ GO:0008270-IEA;GO:0006355-IBA;GO:0005634-IEA;GO:0005634-IBA;GO:0005622-IEA \\ zinc ion binding-IEA;regulation of transcription, DNA-templated-IBA;nucleus-IEA;nucleus-IBA;intracellular-IEA \\ GO:0005634;GO:0008270 \\ nucl			TRINITY_DN7922_c0_g1	FvH4_6g11440.1	4.6905	49.5875	44.897	10.5719	0.00506638	0.476806	(-)-germacrene D synthase-like \\ 0.00E+00 \\ 78.46 % \\ GO:0000287-IEA;GO:0046872-IEA;GO:0016829-IEA;GO:0010333-IEA \\ magnesium ion binding-IEA;metal ion binding-IEA;lyase activity-IEA;terpene synthase activity-IEA \\ GO:0016829;GO:0046872 \\ lyase acti	(-)-germacrene D synthase [EC:4.2.3.75]	Terpene synthase, N-terminal domain
TRINITY_DN9729_c1_g1	FvH4_3g13880.1	0.175	2.61825	2.44325	14.9614	0.000282689	0.0955962	calcium-transporting ATPase 12, plasma membrane-type-like \\ 0.00E+00 \\ 62.31 % \\ GO:0000166-IEA;GO:0016020-IEA;GO:0006816-IEA;GO:0016021-IEA;GO:0005388-IEA;GO:0005388-IBA;GO:0070588-IEA;GO:0006811-IEA;GO:0005887-IBA;GO:0016787-IEA;GO:0005524-IEA;GO:009	Ca2+-transporting ATPase [EC:3.6.3.8]	Cation-transporting P-type ATPase, C-terminal	TRINITY_DN7474_c0_g2	FvH4_6g22790.1	5.602	59.1743	53.5722	10.5631	0.0044837	0.451439	polygalacturonase-inhibiting protein \\ 0.00E+00 \\ 89.73 %		Leucine-rich repeat
TRINITY_DN20063_c0_g1	FvH4_2g17510.1	0.08	1.18975	1.10975	14.8719	0.00412331	0.403201	PREDICTED: uncharacterized protein LOC101291991 \\ 2.50E-86 \\ 85.90 % \\ GO:0007165-IEA;GO:0016020-IEA;GO:0016021-IEA;GO:0043531-IEA;GO:0016787-IEA \\ signal transduction-IEA;membrane-IEA;integral component of membrane-IEA;ADP binding-IEA;hydrolase activ		Protein of unknown function DUF707	TRINITY_DN6072_c0_g1	FvH4_4g09360.1	0.29475	3.05825	2.7635	10.3757	0.00181378	0.278867	cotton fiber protein \\ 5.60E-53 \\ 91.15 % \\ GO:0003723-IEA;GO:0005737-IBA;GO:0071014-IBA;GO:2000815-IBA;GO:0003729-IBA;GO:0071028-IBA;GO:1990904-IBA;GO:0016973-IBA;GO:0005634-IBA;GO:0003676-IEA \\ RNA binding-IEA;cytoplasm-IBA;post-mRNA release spliceo		Protein of unknown function DUF761, plant
TRINITY_DN6051_c0_g1	FvH4_4g23480.1	4.54375	67.4045	62.8607	14.8346	4.48575e-06	0.0143511	probable WRKY transcription factor 75 \\ 3.40E-57 \\ 96.31 % \\ GO:0003677-IEA;GO:0003700-IEA;GO:0006355-IEA;GO:0043565-IEA;GO:0005634-IEA \\ DNA binding-IEA;DNA-binding transcription factor activity-IEA;regulation of transcription, DNA-templated-IEA;sequ		WRKY domain	TRINITY_DN20063_c0_g1	FvH4_2g17510.1	0.115	1.18975	1.07475	10.3457	0.00468261	0.45971	PREDICTED: uncharacterized protein LOC101291991 \\ 2.50E-86 \\ 85.90 % \\ GO:0007165-IEA;GO:0016020-IEA;GO:0016021-IEA;GO:0043531-IEA;GO:0016787-IEA \\ signal transduction-IEA;membrane-IEA;integral component of membrane-IEA;ADP binding-IEA;hydrolase activ		Protein of unknown function DUF707
TRINITY_DN15090_c0_g1	FvH4_4g18480.1	0.2015	2.96225	2.76075	14.701	2.72558e-05	0.0258537	phylloplanin-like \\ 1.40E-86 \\ 76.00 % \\ GO:0016020-IEA;GO:0016021-IEA;GO:0005375-IEA;GO:0035434-IEA \\ membrane-IEA;integral component of membrane-IEA;copper ion transmembrane transporter activity-IEA;copper ion transmembrane transport-IEA \\ GO:00053		Immunoglobulin-like fold	TRINITY_DN2837_c0_g2	FvH4_1g22820.1	1.99525	20.6208	18.6255	10.3349	8.48109e-06	0.0206186	probable WRKY transcription factor 51 \\ 5.70E-44 \\ 86.10 % \\ GO:0000166-IEA;GO:0048544-IEA;GO:0016020-IEA;GO:0016021-IEA;GO:0016310-IEA;GO:0016740-IEA;GO:0004672-IEA;GO:0016301-IEA;GO:0004674-IEA;GO:0005524-IEA;GO:0006468-IEA \\ nucleotide binding-IEA;		WRKY domain
TRINITY_DN4512_c0_g2	FvH4_5g11820.1	0.102	1.48625	1.38425	14.5711	0.00432694	0.414232	putative glycosyl transferase, family 14		Glycosyl transferase, family 14	TRINITY_DN245886_c0_g1	FvH4_1g16190.1	0.30375	3.13425	2.8305	10.3185	0.00204137	0.297362	proteinase inhibitor-like		Proteinase inhibitor I13, potato inhibitor I
TRINITY_DN11861_c0_g2	FvH4_4g19170.1	62.5905	907.31	844.719	14.496	0.00199431	0.276005	major allergen Pru av 1-like \\ 3.60E-39 \\ 86.64 %		Bet v I/Major latex protein	TRINITY_DN10629_c0_g1	FvH4_4g35180.1	1.60975	16.4965	14.8867	10.2479	0.00298611	0.362719	metalloendoproteinase 2-MMP \\ 0.00E+00 \\ 82.83 % \\ GO:0008270-IEA;GO:0008233-IEA;GO:0046872-IEA;GO:0006508-IEA;GO:0008237-IEA;GO:0031012-IEA;GO:0004222-IEA;GO:0016787-IEA \\ zinc ion binding-IEA;peptidase activity-IEA;metal ion binding-IEA;proteolysis-		Peptidase M10, metallopeptidase
TRINITY_DN266087_c0_g1	FvH4_5g17730.1	0.118	1.706	1.588	14.4576	0.00250061	0.309953	U-box domain-containing protein 21-like		U box domain	TRINITY_DN12729_c0_g1	FvH4_6g12390.1	5.26275	52.694	47.4313	10.0126	0.000749347	0.175023	PAR1 protein		PAR1
TRINITY_DN10005_c0_g1	FvH4_2g23780.1	22.524	324.823	302.299	14.4212	0.0150184	0.821359	basic 7S globulin-like \\ 0.00E+00 \\ 87.78 % \\ GO:0008152-IEA;GO:0042973-IEA;GO:0004553-IEA;GO:0016787-IEA;GO:0005975-IEA;GO:0016798-IEA \\ metabolic process-IEA;glucan endo-1,3-beta-D-glucosidase activity-IEA;hydrolase activity, hydrolyzing O-glycosyl		Aspartic peptidase A1 family	TRINITY_DN11861_c0_g2	FvH4_4g19170.1	90.6965	907.31	816.613	10.0038	0.0025728	0.337708	major allergen Pru av 1-like \\ 3.60E-39 \\ 86.64 %		Bet v I/Major latex protein
TRINITY_DN6203_c0_g2	FvH4_2g13240.1	0.8655	12.3432	11.4778	14.2614	0.000185137	0.0750462	ethylene-responsive transcription factor ABR1-like \\ 4.20E-72 \\ 76.48 % \\ GO:0003677-IEA;GO:0003700-IEA;GO:0006351-IEA;GO:0006355-IEA;GO:0005634-IEA \\ DNA binding-IEA;DNA-binding transcription factor activity-IEA;transcription, DNA-templated-IEA;regul		AP2/ERF domain	TRINITY_DN32498_c0_g1	FvH4_3g05150.1	0.15825	1.58275	1.4245	10.0016	0.000515729	0.147796	hypothetical protein RchiOBHm_Chr5g0014611 \\ 5.80E-41 \\ 76.49 % \\ GO:0016020-IEA;GO:0016021-IEA;GO:0022900-IEA \\ membrane-IEA;integral component of membrane-IEA;electron transport chain-IEA \\ GO:0016020 \\ membrane
TRINITY_DN19856_c0_g1	FvH4_5g10980.1	1.979	28.1677	26.1887	14.2333	0.00375543	0.382079	NADP-specific glutamate dehydrogenase, putative \\ 1.50E-16 \\ 92.30 % \\ GO:0016020-IEA;GO:0016021-IEA \\ membrane-IEA;integral component of membrane-IEA \\ GO:0016021 \\ integral component of membrane			TRINITY_DN46688_c0_g1	FvH4_5g10560.1	2.66525	26.5485	23.8833	9.96098	0.00065802	0.162261	Avr9/Cf-9 rapidly elicited protein \\ 0.00E+00 \\ 89.95 % \\ GO:0015698-IEA;GO:0055085-IEA;GO:0008308-IEA;GO:0098656-IEA;GO:0005741-IEA \\ inorganic anion transport-IEA;transmembrane transport-IEA;voltage-gated anion channel activity-IEA;anion transmembra
TRINITY_DN10629_c0_g1	FvH4_4g35180.1	1.1915	16.4965	15.305	13.8452	0.00260252	0.31665	metalloendoproteinase 2-MMP \\ 0.00E+00 \\ 82.83 % \\ GO:0008270-IEA;GO:0008233-IEA;GO:0046872-IEA;GO:0006508-IEA;GO:0008237-IEA;GO:0031012-IEA;GO:0004222-IEA;GO:0016787-IEA \\ zinc ion binding-IEA;peptidase activity-IEA;metal ion binding-IEA;proteolysis-		Peptidase M10, metallopeptidase	TRINITY_DN8165_c0_g1	FvH4_7g26430.1	70.2163	696.219	626.003	9.91535	1.82829e-05	0.0299651	putative bifunctional inhibitor/plant lipid transfer protein/seed storage helical
TRINITY_DN6531_c0_g1	FvH4_1g09240.1	1.1625	16.0475	14.885	13.8043	0.000101189	0.0537471	probable flavin-containing monooxygenase 1 \\ 0.00E+00 \\ 89.65 % \\ GO:0016491-IEA;GO:0050660-IEA;GO:0050661-IEA;GO:0055114-IEA;GO:0004497-IEA;GO:0004499-IEA \\ oxidoreductase activity-IEA;flavin adenine dinucleotide binding-IEA;NADP binding-IEA;oxidatio	dimethylaniline monooxygenase (N-oxide forming) [EC:1.14.13.8]	Flavin monooxygenase FMO	TRINITY_DN15_c0_g1	FvH4_6g06100.1	6.12725	60.633	54.5057	9.89563	7.97148e-05	0.0568466	probable linoleate 9S-lipoxygenase 5 \\ 0.00E+00 \\ 86.14 % \\ GO:0031408-IEA;GO:0016702-IEA;GO:0051213-IEA;GO:0016491-IEA;GO:0046872-IEA;GO:0055114-IEA;GO:0006633-IEA \\ oxylipin biosynthetic process-IEA;oxidoreductase activity, acting on single donors w	linoleate 9S-lipoxygenase [EC:1.13.11.58]	Lipoxygenase
TRINITY_DN1053_c0_g1	FvH4_2g20090.1	8.818	121.16	112.342	13.7401	6.65631e-06	0.0164049	glutathione transferase GST 23-like	glutathione S-transferase [EC:2.5.1.18]	Glutathione S-transferase, N-terminal	TRINITY_DN1053_c0_g1	FvH4_2g20090.1	12.2465	121.16	108.914	9.89344	7.78097e-06	0.0196106	glutathione transferase GST 23-like	glutathione S-transferase [EC:2.5.1.18]	Glutathione S-transferase, N-terminal
TRINITY_DN8093_c0_g2	FvH4_2g06190.1	0.66125	9.07625	8.415	13.7259	7.08835e-05	0.0446566	protein PLANT CADMIUM RESISTANCE 2-like		PLAC8 motif-containing protein	TRINITY_DN7001_c0_g1	FvH4_3g10940.1	5.3745	53.0853	47.7108	9.87724	2.05813e-06	0.0130281	tetrahydrocannabinolic acid synthase-like \\ 0.00E+00 \\ 86.32 % \\ GO:0071949-IEA;GO:0050660-IEA;GO:0003824-IEA;GO:0016491-IEA;GO:0055114-IEA;GO:0050328-IEA \\ FAD binding-IEA;flavin adenine dinucleotide binding-IEA;catalytic activity-IEA;oxidoreductase		FAD linked oxidase, N-terminal
TRINITY_DN198_c1_g4	FvH4_6g49810.1	1.07675	14.777	13.7003	13.7237	0.000560692	0.140557	probable galacturonosyltransferase-like 10		Glycosyl transferase, family 8	TRINITY_DN7311_c0_g1	FvH4_5g20290.1	16.9045	166.78	149.876	9.86603	0.0106885	0.710583	expansin-like B1 \\ 1.60E-07 \\ 99.22 % \\ GO:0004722-IEA;GO:0046872-IEA;GO:0003824-IEA;GO:0006470-IEA;GO:0043169-IEA;GO:0016787-IEA;GO:0004721-IEA \\ protein serine/threonine phosphatase activity-IEA;metal ion binding-IEA;catalytic activity-IEA;protein d		Expansin/pollen allergen, DPBB domain
TRINITY_DN10405_c0_g1	FvH4_2g05000.1	11.817	162.08	150.263	13.7158	6.30811e-06	0.016275	basic secretory protease \\ 3.80E-59 \\ 55.57 % \\ GO:0003964-IEA;GO:0016779-IEA;GO:0008270-IEA;GO:0016020-IEA;GO:0016829-IEA;GO:0016021-IEA;GO:0006278-IEA;GO:0015074-IEA;GO:0000943-IEA;GO:0016740-IEA;GO:0010333-IEA;GO:0003676-IEA \\ RNA-directed DNA poly		Uncharacterised protein family, basic secretory protein	TRINITY_DN4010_c0_g2	FvH4_5g32830.1	0.6945	6.84925	6.15475	9.86213	0.00532058	0.489141	putative powdery mildew resistance protein, RPW8 \\ 2.80E-10 \\ 90.74 % \\ GO:0016020-IEA;GO:0016021-IEA \\ membrane-IEA;integral component of membrane-IEA \\ GO:0016021 \\ integral component of membrane		Powdery mildew resistance protein, RPW8 domain
TRINITY_DN199383_c0_g1	FvH4_6g45100.1	0.58575	7.99025	7.4045	13.6411	0.00243635	0.306229	NDR1/HIN1-like protein 6			TRINITY_DN4512_c0_g2	FvH4_5g11820.1	0.1515	1.48625	1.33475	9.81023	0.00519024	0.482631	putative glycosyl transferase, family 14		Glycosyl transferase, family 14
TRINITY_DN37706_c1_g2	FvH4_3g16620.1	0.132	1.77675	1.64475	13.4602	2.98949e-09	0.000920971	VQ motif-containing protein 1-like \\ 1.20E-33 \\ 56.83 %		VQ	TRINITY_DN7004_c0_g1	FvH4_2g29870.1	0.34975	3.384	3.03425	9.67548	0.00047132	0.141382	cysteine-rich receptor-like protein kinase 26 \\ 0.00E+00 \\ 78.70 % \\ GO:0016020-IEA;GO:0016021-IEA;GO:0004672-IEA;GO:0016740-IEA;GO:0005524-IEA;GO:0006468-IEA \\ membrane-IEA;integral component of membrane-IEA;protein kinase activity-IEA;transferase ac		Protein kinase domain
TRINITY_DN24013_c0_g1	FvH4_6g44340.1	0.15325	2.044	1.89075	13.3377	0.000471175	0.126929	myb-related protein Myb4-like \\ 2.20E-150 \\ 80.78 % \\ GO:0043531-IEA;GO:0016787-IEA \\ ADP binding-IEA;hydrolase activity-IEA \\ GO:0016787;GO:0043531 \\ hydrolase activity;ADP binding	transcription factor MYB, plant	SANT/Myb domain	TRINITY_DN6944_c0_g1	FvH4_7g10080.1	0.675	6.50825	5.83325	9.64185	0.000454657	0.139369	ethylene-responsive transcription factor 13-like \\ 2.10E-125 \\ 94.15 % \\ GO:0016491-IEA;GO:0016020-IEA;GO:0016021-IEA;GO:0055114-IEA;GO:0009522-IEA;GO:0015979-IEA;GO:0009538-IEA \\ oxidoreductase activity-IEA;membrane-IEA;integral component of membrane		AP2/ERF domain
TRINITY_DN12942_c0_g1	FvH4_4g28560.1	0.08175	1.088	1.00625	13.3089	1.33165e-05	0.0201682	PREDICTED: uncharacterized protein LOC101314743 \\ 0.00E+00 \\ 84.57 % \\ GO:0055085-IEA;GO:0016020-IEA;GO:0016021-IEA;GO:0022857-IEA \\ transmembrane transport-IEA;membrane-IEA;integral component of membrane-IEA;transmembrane transporter activity-IEA \\		Protein of unknown function DUF1262	TRINITY_DN2726_c2_g1	FvH4_1g23370.1	0.14475	1.3935	1.24875	9.62694	7.14287e-06	0.0191298	G-type lectin S-receptor-like serine/threonine-protein kinase LECRK3 \\ 0.00E+00 \\ 77.97 % \\ GO:0000166-IEA;GO:0048544-IEA;GO:0016020-IEA;GO:0016021-IEA;GO:0016310-IEA;GO:0004672-IEA;GO:0016740-IEA;GO:0016301-IEA;GO:0004674-IEA;GO:0030246-IEA;GO:0005524		Protein kinase domain
TRINITY_DN15333_c0_g1	FvH4_4g33190.1	0.68775	9.1165	8.42875	13.2555	4.84894e-05	0.0363458	U-box domain-containing protein 21-like \\ 0.00E+00 \\ 80.33 % \\ GO:0008152-IEA;GO:0000981-IEA;GO:0008270-IEA;GO:0006355-IEA;GO:0004553-IEA;GO:0016787-IEA;GO:0016798-IEA;GO:0005975-IEA;GO:0005634-IEA;GO:0006357-IEA \\ metabolic process-IEA;DNA-binding tr		U box domain	TRINITY_DN695_c0_g1	FvH4_6g24640.1	8.454	80.4952	72.0412	9.52156	2.73773e-07	0.00542396	glucan endo-1,3-beta-glucosidase, basic isoform-like \\ 8.30E-179 \\ 72.02 % \\ GO:0008270-IEA;GO:0003676-IEA \\ zinc ion binding-IEA;nucleic acid binding-IEA		Glycoside hydrolase family 17
TRINITY_DN1758_c1_g1	FvH4_6g39430.1	0.43875	5.8005	5.36175	13.2205	0.0206323	0.974197	putative UDP-glucose flavonoid 3-O-glucosyltransferase 3 \\ 0.00E+00 \\ 83.70 % \\ GO:0016757-IEA;GO:0016758-IEA;GO:0102360-IEA;GO:0102425-IEA;GO:0047893-IEA;GO:0016740-IEA \\ transferase activity, transferring glycosyl groups-IEA;transferase activity, tr		UDP-glucuronosyl/UDP-glucosyltransferase	TRINITY_DN9729_c1_g1	FvH4_3g13880.1	0.278	2.61825	2.34025	9.41817	0.000355422	0.121731	calcium-transporting ATPase 12, plasma membrane-type-like \\ 0.00E+00 \\ 62.31 % \\ GO:0000166-IEA;GO:0016020-IEA;GO:0006816-IEA;GO:0016021-IEA;GO:0005388-IEA;GO:0005388-IBA;GO:0070588-IEA;GO:0006811-IEA;GO:0005887-IBA;GO:0016787-IEA;GO:0005524-IEA;GO:009	Ca2+-transporting ATPase [EC:3.6.3.8]	Cation-transporting P-type ATPase, C-terminal
TRINITY_DN2594_c0_g2	FvH4_3g12720.1	2.37575	30.524	28.1483	12.8482	3.21423e-05	0.028211	VQ motif-containing protein 22 \\ 0.00E+00 \\ 95.32 % \\ GO:0005737-IEA;GO:0016192-IEA;GO:0003824-IEA;GO:0016020-IEA;GO:0015031-IEA;GO:0031410-IEA;GO:0005198-IEA;GO:0030663-IEA;GO:0000139-IEA;GO:0005794-IEA;GO:0030117-IEA;GO:0006886-IEA \\ cytoplasm-IEA;v		VQ	TRINITY_DN23992_c0_g1	FvH4_5g35590.1	4.628	43.4395	38.8115	9.38624	0.00152974	0.255985	probable pectinesterase/pectinesterase inhibitor 20 \\ 0.00E+00 \\ 83.63 % \\ GO:0004857-IEA;GO:0005618-IEA;GO:0043086-IEA;GO:0045330-IEA;GO:0030599-IEA;GO:0042545-IEA;GO:0045490-IEA;GO:0016787-IEA \\ enzyme inhibitor activity-IEA;cell wall-IEA;negative r	pectinesterase [EC:3.1.1.11]	Pectinesterase, catalytic
TRINITY_DN1990_c1_g1	FvH4_7g22200.1	0.11475	1.47425	1.3595	12.8475	0.00195039	0.273119	CASP-like protein 4D1 \\ 7.00E-16 \\ 74.25 % \\ GO:0003954-IEA;GO:0003954-IBA;GO:0005747-IBA;GO:0046872-IEA;GO:0016491-IEA;GO:0005739-IEA;GO:0048038-IEA;GO:0055114-IEA;GO:0070469-IEA;GO:0051539-IEA;GO:0032981-IBA;GO:0009060-IBA;GO:0051536-IEA;GO:0015990-I		Domain of unknown function DUF588	TRINITY_DN4269_c0_g3	FvH4_2g33250.1	7.9745	73.9175	65.943	9.26923	0.00647492	0.546854	zinc finger protein ZAT10-like \\ 7.80E-06 \\ 86.11 %		Zinc finger C2H2-type
TRINITY_DN10620_c0_g1	FvH4_7g00010.1	1.95875	24.7997	22.841	12.661	0.00196658	0.274262	Transcription termination factor like \\ 0.00E+00 \\ 82.08 % \\ GO:0030448-IBA;GO:0005946-IBA;GO:0005737-IBA;GO:0031505-IBA;GO:0003824-IEA;GO:0003825-IBA;GO:0004805-IBA;GO:0070413-IBA;GO:0016740-IEA;GO:0016311-IEA;GO:0034605-IBA;GO:0043936-IBA;GO:0005992-			TRINITY_DN32003_c0_g1	FvH4_1g20660.1	0.31475	2.90975	2.595	9.24464	0.00243853	0.328436	---NA---
TRINITY_DN11091_c0_g3	FvH4_1g02880.1	5.0665	63.9365	58.87	12.6195	0.00276573	0.324958	umecyanin-like \\ 2.00E-93 \\ 76.83 % \\ GO:0061630-IBA;GO:0016746-IEA;GO:0008270-IEA;GO:0046872-IEA;GO:0004839-IEA;GO:0016740-IEA;GO:0016874-IEA;GO:0016567-IEA;GO:0006511-IBA \\ ubiquitin protein ligase activity-IBA;transferase activity, transferring acy		Phytocyanin domain	TRINITY_DN322406_c0_g1	FvH4_3g25960.1	0.831	7.664	6.833	9.22262	0.000304128	0.112771	probable CCR4-associated factor 1 homolog 11 \\ 2.30E-88 \\ 63.88 %	CCR4-NOT transcription complex subunit 7/8	Ribonuclease CAF1
TRINITY_DN12556_c0_g1	FvH4_5g34510.1	0.713	8.95625	8.24325	12.5614	0.00110979	0.198544	UDP-glycosyltransferase 91C1 \\ 0.00E+00 \\ 79.84 % \\ GO:0016757-IEA;GO:0016758-IEA;GO:0047213-IEA;GO:0016020-IEA;GO:0005829-IEA;GO:0016021-IEA;GO:0016740-IEA;GO:0102241-IEA \\ transferase activity, transferring glycosyl groups-IEA;transferase activity,		UDP-glucuronosyl/UDP-glucosyltransferase	TRINITY_DN4191_c0_g2	FvH4_1g20790.1	0.7345	6.73125	5.99675	9.1644	0.00286875	0.357514	putative transcription factor interactor and regulator CCHC(Zn) family \\ 0.00E+00 \\ 98.83 % \\ GO:0004634-IEA;GO:0000287-IEA;GO:0046872-IEA;GO:0006096-IEA;GO:0000015-IEA \\ phosphopyruvate hydratase activity-IEA;magnesium ion binding-IEA;metal ion bindi
TRINITY_DN326962_c0_g1	FvH4_4g02930.1	0.6025	7.48125	6.87875	12.417	0.00693038	0.534421	Proteinase inhibitor I13, potato inhibitor I \\ 6.70E-55 \\ 95.63 % \\ GO:0005525-IEA;GO:0000166-IEA;GO:0016787-IEA;GO:0005622-IEA \\ GTP binding-IEA;nucleotide binding-IEA;hydrolase activity-IEA;intracellular-IEA \\ GO:0005525;GO:0005622;GO:0016787 \\ GT		Proteinase inhibitor I13, potato inhibitor I	TRINITY_DN12942_c0_g1	FvH4_4g28560.1	0.1195	1.088	0.9685	9.1046	1.08727e-05	0.0232607	PREDICTED: uncharacterized protein LOC101314743 \\ 0.00E+00 \\ 84.57 % \\ GO:0055085-IEA;GO:0016020-IEA;GO:0016021-IEA;GO:0022857-IEA \\ transmembrane transport-IEA;membrane-IEA;integral component of membrane-IEA;transmembrane transporter activity-IEA \\		Protein of unknown function DUF1262
TRINITY_DN1498_c2_g1	FvH4_1g23740.1	1.98575	24.6275	22.6417	12.4021	3.01462e-05	0.0270762	FAD-dependent urate hydroxylase-like \\ 9.10E-42 \\ 70.18 % \\ GO:0031047-IEA;GO:0003676-IEA \\ gene silencing by RNA-IEA;nucleic acid binding-IEA		FAD-binding domain	TRINITY_DN3307_c0_g1	FvH4_5g11250.1	2.63975	23.8923	21.2525	9.05095	2.4892e-06	0.0130281	protein SAR DEFICIENT 1 \\ 0.00E+00 \\ 86.14 % \\ GO:0005516-IEA \\ calmodulin binding-IEA \\ GO:0005516 \\ calmodulin binding		Powdery mildew resistance protein, RPW8 domain
TRINITY_DN1603_c1_g1	FvH4_6g24120.1	2.338	28.8305	26.4925	12.3313	2.45428e-05	0.0246004	heat stress transcription factor B-3	heat shock transcription factor, other eukaryote	Heat shock factor (HSF)-type, DNA-binding	TRINITY_DN3888_c0_g1	FvH4_3g21390.1	5.47475	49.3655	43.8907	9.01694	0.000474871	0.141757	(-)-alpha-pinene synthase-like \\ 0.00E+00 \\ 76.48 % \\ GO:0000287-IEA;GO:0046872-IEA;GO:0016829-IEA;GO:0010333-IEA \\ magnesium ion binding-IEA;metal ion binding-IEA;lyase activity-IEA;terpene synthase activity-IEA \\ GO:0016829;GO:0046872 \\ lyase acti	(-)-germacrene D synthase [EC:4.2.3.75]	Terpene synthase, N-terminal domain
TRINITY_DN11596_c0_g1	FvH4_5g01820.1	6.21425	76.233	70.0188	12.2674	0.0182859	0.909438	protein P21-like \\ 0.00E+00 \\ 89.90 % \\ GO:0004613-IEA;GO:0004613-IBA;GO:0005525-IEA;GO:0000166-IEA;GO:0071333-IBA;GO:0046872-IEA;GO:0017076-IEA;GO:0016020-IEA;GO:0005829-N/A;GO:0005829-IBA;GO:0042594-IBA;GO:0016021-IEA;GO:0019543-IBA;GO:0016310-IEA;GO		Thaumatin	TRINITY_DN12105_c0_g1	FvH4_3g00340.1	1.06875	9.62775	8.559	9.00842	0.000140359	0.0750701	nudix hydrolase 2-like \\ 0.00E+00 \\ 72.26 % \\ GO:0007165-IEA;GO:0016020-IEA;GO:0016021-IEA;GO:0043531-IEA;GO:0016787-IEA \\ signal transduction-IEA;membrane-IEA;integral component of membrane-IEA;ADP binding-IEA;hydrolase activity-IEA \\ GO:0016020 \\		NUDIX hydrolase domain
TRINITY_DN7139_c0_g1	FvH4_4g01640.1	1.43825	17.4958	16.0575	12.1646	0.00116074	0.203494	putative calcium-transporting ATPase 13, plasma membrane-type \\ 0.00E+00 \\ 84.49 % \\ GO:0000166-IEA;GO:0016020-IEA;GO:0006816-IEA;GO:0016021-IEA;GO:0005388-IEA;GO:0070588-IEA;GO:0006811-IEA;GO:0016787-IEA;GO:0005524-IEA;GO:0099132-IEA \\ nucleotide bin	Ca2+-transporting ATPase [EC:3.6.3.8]	P-type ATPase	TRINITY_DN6683_c0_g2	FvH4_5g09240.1	2.6095	23.0568	20.4473	8.8357	0.00160916	0.26425	mitochondrial phosphate carrier protein 2, mitochondrial \\ 0.00E+00 \\ 91.12 % \\ GO:0016020-IEA;GO:0016021-IEA \\ membrane-IEA;integral component of membrane-IEA \\ GO:0016021 \\ integral component of membrane		Protein of unknown function DUF1677, Oryza sativa
TRINITY_DN46688_c0_g1	FvH4_5g10560.1	2.184	26.5485	24.3645	12.1559	0.000583996	0.14256	Avr9/Cf-9 rapidly elicited protein \\ 0.00E+00 \\ 89.95 % \\ GO:0015698-IEA;GO:0055085-IEA;GO:0008308-IEA;GO:0098656-IEA;GO:0005741-IEA \\ inorganic anion transport-IEA;transmembrane transport-IEA;voltage-gated anion channel activity-IEA;anion transmembra			TRINITY_DN321_c2_g2	FvH4_3g17850.1	3.1205	27.27	24.1495	8.73898	0.000634186	0.160475	probable leucine-rich repeat receptor-like serine/threonine-protein kinase At3g14840 \\ 0.00E+00 \\ 82.54 % \\ GO:0016020-IEA;GO:0016021-IEA;GO:0046777-IBA;GO:0016310-IEA;GO:0004672-IEA;GO:0016301-IEA;GO:0004674-IBA;GO:0005524-IEA;GO:0006468-IEA;GO:000588		Protein kinase domain
TRINITY_DN32498_c0_g1	FvH4_3g05150.1	0.131	1.58275	1.45175	12.0821	0.00048098	0.128848	hypothetical protein RchiOBHm_Chr5g0014611 \\ 5.80E-41 \\ 76.49 % \\ GO:0016020-IEA;GO:0016021-IEA;GO:0022900-IEA \\ membrane-IEA;integral component of membrane-IEA;electron transport chain-IEA \\ GO:0016020 \\ membrane			TRINITY_DN906_c3_g1	FvH4_6g11360.1	6.67325	58.064	51.3908	8.70101	0.0058964	0.519463	protein SRG1-like		Oxoglutarate/iron-dependent dioxygenase
TRINITY_DN16434_c0_g1	FvH4_4g27220.1	0.355	4.24175	3.88675	11.9486	0.000160113	0.0687489	VQ motif-containing protein 20-like \\ 0.00E+00 \\ 66.55 % \\ GO:0016020-IEA;GO:0016021-IEA \\ membrane-IEA;integral component of membrane-IEA		VQ	TRINITY_DN3209_c0_g2	FvH4_3g38650.1	3.73475	32.0123	28.2775	8.57146	0.00698478	0.568808	probable pyridoxal 5'-phosphate synthase subunit PDX1 \\ 0.00E+00 \\ 94.76 % \\ GO:0042823-IEA;GO:0003824-IEA;GO:0042819-IEA;GO:0016829-IEA;GO:0036381-IEA \\ pyridoxal phosphate biosynthetic process-IEA;catalytic activity-IEA;vitamin B6 biosynthetic proce	pyridoxal 5'-phosphate synthase pdxS subunit [EC:4.3.3.6]	Pyridoxal 5'-phosphate synthase subunit PdxS/SNZ
TRINITY_DN450_c1_g1	FvH4_4g19070.1	224.581	2664.44	2439.86	11.8641	0.000490463	0.130144	major allergen Pru ar 1-like \\ 8.20E-132 \\ 84.58 % \\ GO:0005737-IBA;GO:0009738-IBA;GO:0080163-IBA;GO:0038023-IBA;GO:0010427-IBA;GO:0032515-IEA;GO:0004864-IBA;GO:0005634-IBA \\ cytoplasm-IBA;abscisic acid-activated signaling pathway-IBA;regulation of pr		Bet v I/Major latex protein	TRINITY_DN3005_c0_g1	FvH4_3g03890.1	2.039	17.4715	15.4325	8.56866	0.0098809	0.683126	hypothetical protein RchiOBHm_Chr5g0006141 \\ 4.20E-40 \\ 58.76 % \\ GO:0031072-IEA;GO:0009408-IEA;GO:0046872-IEA;GO:0005829-IBA;GO:0051082-IEA;GO:0005524-IEA;GO:0006457-IEA \\ heat shock protein binding-IEA;response to heat-IEA;metal ion binding-IEA;cyto
TRINITY_DN22511_c0_g1	FvH4_6g18050.1	0.178	2.076	1.898	11.6629	0.000860653	0.171912	hypothetical protein RchiOBHm_Chr3g0472321			TRINITY_DN14173_c0_g1	FvH4_5g10850.1	0.79475	6.7965	6.00175	8.55175	0.0201863	1	transcription factor MYC2-like \\ 0.00E+00 \\ 73.19 % \\ GO:0046983-IEA \\ protein dimerization activity-IEA \\ GO:0046983 \\ protein dimerization activity		Myc-type, basic helix-loop-helix (bHLH) domain
TRINITY_DN7877_c1_g1	FvH4_2g05950.1	1.2	13.9298	12.7298	11.6081	9.39737e-07	0.00673267	putative leucine-rich repeat-containing, plant-type, leucine-rich repeat domain, L \\ 0.00E+00 \\ 74.80 % \\ GO:0016020-IEA;GO:0016021-IEA \\ membrane-IEA;integral component of membrane-IEA \\ GO:0016021 \\ integral component of membrane		Leucine-rich repeat	TRINITY_DN26577_c0_g1	FvH4_4g18630.1	1.73175	14.7715	13.0397	8.52981	0.0053731	0.491265	RING-H2 finger protein ATL2 \\ 2.20E-153 \\ 74.63 % \\ GO:0016020-IEA;GO:0016021-IEA \\ membrane-IEA;integral component of membrane-IEA \\ GO:0016021 \\ integral component of membrane		Zinc finger, RING-type
TRINITY_DN510_c1_g1	FvH4_2g33720.1	0.522	6.0185	5.4965	11.5297	0.000134089	0.062074	putative transcription factor MYC/MYB \\ 0.00E+00 \\ 84.72 %		Transcription factor MYC/MYB N-terminal	TRINITY_DN4437_c0_g1	FvH4_7g32500.1	6.455	54.527	48.072	8.44725	3.88634e-07	0.00686155	AAA-ATPase At2g46620-like \\ 0.00E+00 \\ 86.75 % \\ GO:0016020-IEA;GO:0016021-IEA;GO:0005524-IEA \\ membrane-IEA;integral component of membrane-IEA;ATP binding-IEA \\ GO:0005524;GO:0016021 \\ ATP binding;integral component of membrane	mitochondrial chaperone BCS1	AAA+ ATPase domain
TRINITY_DN12946_c0_g1	FvH4_6g53770.1	1.74225	19.927	18.1848	11.4375	2.99005e-05	0.0270762	probable WRKY transcription factor 75 \\ 2.00E-51 \\ 93.84 % \\ GO:0003677-IEA;GO:0003700-IEA;GO:0006355-IEA;GO:0043565-IEA;GO:0005634-IEA \\ DNA binding-IEA;DNA-binding transcription factor activity-IEA;regulation of transcription, DNA-templated-IEA;sequ		WRKY domain	TRINITY_DN133_c0_g1	FvH4_2g20060.1	4.71425	39.7245	35.0102	8.42647	9.35235e-05	0.0609979	probable glutathione S-transferase \\ 0.00E+00 \\ 72.54 % \\ GO:0003676-IEA \\ nucleic acid binding-IEA	glutathione S-transferase [EC:2.5.1.18]	Glutathione S-transferase, N-terminal
TRINITY_DN133_c0_g1	FvH4_2g20060.1	3.474	39.7245	36.2505	11.4348	7.39054e-05	0.045811	probable glutathione S-transferase \\ 0.00E+00 \\ 72.54 % \\ GO:0003676-IEA \\ nucleic acid binding-IEA	glutathione S-transferase [EC:2.5.1.18]	Glutathione S-transferase, N-terminal	TRINITY_DN3581_c0_g1	FvH4_1g02900.1	2.60075	21.8642	19.2635	8.4069	0.00294089	0.360808	blue copper protein-like \\ 4.10E-122 \\ 75.26 % \\ GO:0003677-IEA;GO:0003700-IEA;GO:0006355-IEA;GO:0043565-IEA;GO:0005634-IEA \\ DNA binding-IEA;DNA-binding transcription factor activity-IEA;regulation of transcription, DNA-templated-IEA;sequence-specifi		Phytocyanin domain
TRINITY_DN1073_c3_g1	FvH4_5g02050.1	0.82125	9.3505	8.52925	11.3857	1.59766e-05	0.0201718	putative methyltransferase DDB_G0268948 \\ 1.80E-128 \\ 80.37 %		Lipopolysaccharide-modifying protein	TRINITY_DN8595_c0_g3	FvH4_3g32960.1	0.1335	1.117	0.9835	8.36704	0.000130393	0.0722484	glutamate receptor 2.7-like \\ 0.00E+00 \\ 73.51 % \\ GO:0003856-IEA;GO:0004713-IEA;GO:0009073-IEA;GO:0016491-IEA;GO:0055114-IEA;GO:0016310-IEA;GO:0004672-IEA;GO:0016301-IEA;GO:0005524-IEA;GO:0018108-IEA;GO:0006468-IEA \\ 3-dehydroquinate synthase activit	glutamate receptor, ionotropic, plant	Ionotropic glutamate receptor
TRINITY_DN15100_c0_g1	FvH4_3g02220.1	0.24025	2.73125	2.491	11.3684	0.000182682	0.074443	PREDICTED: uncharacterized protein LOC105350192 \\ 4.30E-102 \\ 83.87 % \\ GO:0016746-IEA;GO:0016747-IEA;GO:0003824-IEA;GO:0016020-IEA;GO:0016740-IEA;GO:0006633-IEA \\ transferase activity, transferring acyl groups-IEA;transferase activity, transferring a			TRINITY_DN721_c0_g1	FvH4_7g30310.1	31.089	258.178	227.089	8.30446	2.76626e-05	0.0357312	heavy metal-associated isoprenylated plant protein 3-like isoform X1 \\ 2.50E-24 \\ 78.87 % \\ GO:0007165-IEA;GO:0016020-IEA;GO:0016021-IEA;GO:0043531-IEA;GO:0016787-IEA \\ signal transduction-IEA;membrane-IEA;integral component of membrane-IEA;ADP bindin		Heavy metal-associated domain, HMA
TRINITY_DN171811_c0_g1	FvH4_1g18020.1	3.17575	36.0082	32.8325	11.3385	0.000259438	0.0916574	VQ motif-containing protein 29-like \\ 1.10E-159 \\ 79.53 % \\ GO:0031429-IEA;GO:0001522-IEA;GO:0042254-IEA \\ box H/ACA snoRNP complex-IEA;pseudouridine synthesis-IEA;ribosome biogenesis-IEA \\ GO:0001522;GO:0031429;GO:0042254 \\ pseudouridine synthesis;		VQ	TRINITY_DN2950_c0_g3	FvH4_5g31830.1	0.511	4.21825	3.70725	8.25489	9.86137e-05	0.0623818	protein NRT1/ PTR FAMILY 5.10-like \\ 0.00E+00 \\ 82.21 % \\ GO:0055085-IEA;GO:0006857-IEA;GO:0016020-IEA;GO:0016021-IEA;GO:0022857-IEA;GO:0005215-IEA \\ transmembrane transport-IEA;oligopeptide transport-IEA;membrane-IEA;integral component of membrane-IE		Proton-dependent oligopeptide transporter family
TRINITY_DN32003_c0_g1	FvH4_1g20660.1	0.257	2.90975	2.65275	11.322	0.00227296	0.294586	---NA---			TRINITY_DN9264_c0_g1	FvH4_2g38310.1	0.402	3.31425	2.91225	8.2444	0.0240112	1	thaumatin-like protein 1b		Thaumatin
TRINITY_DN24639_c0_g1	FvH4_6g18630.1	0.64325	7.2035	6.56025	11.1986	0.000288034	0.096346	protein BIC1 \\ 1.40E-19 \\ 83.24 % \\ GO:0055085-IEA;GO:0015297-IEA;GO:0016020-IEA;GO:0016021-IEA;GO:0006855-IEA;GO:0015238-IEA \\ transmembrane transport-IEA;antiporter activity-IEA;membrane-IEA;integral component of membrane-IEA;drug transmembrane tran			TRINITY_DN14114_c0_g1	FvH4_6g19530.1	3.373	27.805	24.432	8.2434	0.00226666	0.317714	probable F-box protein At1g60180 \\ 0.00E+00 \\ 84.03 % \\ GO:0016020-IEA;GO:0016021-IEA \\ membrane-IEA;integral component of membrane-IEA \\ GO:0016021 \\ integral component of membrane		F-box domain
TRINITY_DN4231_c0_g2	FvH4_7g13230.1	0.75175	8.412	7.66025	11.1899	0.00017232	0.0721994	mitogen-activated protein kinase kinase kinase ANP1 \\ 2.30E-149 \\ 71.69 % \\ GO:0023014-IBA;GO:0005737-IBA;GO:0031098-IBA;GO:0032147-IBA;GO:0016310-IEA;GO:0004672-IEA;GO:0016301-IEA;GO:0004674-IBA;GO:0005524-IEA;GO:0006468-IEA \\ signal transduction by		Protein kinase domain	TRINITY_DN6723_c2_g1	FvH4_4g27520.1	8.20825	67.5405	59.3323	8.22837	0.000132631	0.072575	protein NIM1-INTERACTING 2 \\ 3.90E-96 \\ 76.75 % \\ GO:0003964-IEA;GO:0008270-IEA;GO:0006278-IEA;GO:0015074-IEA;GO:0003676-IEA \\ RNA-directed DNA polymerase activity-IEA;zinc ion binding-IEA;RNA-dependent DNA biosynthetic process-IEA;DNA integration-IEA		Protein NIM1-INTERACTING 2
TRINITY_DN2837_c0_g2	FvH4_1g22820.1	1.8475	20.6208	18.7733	11.1614	7.84952e-06	0.0173971	probable WRKY transcription factor 51 \\ 5.70E-44 \\ 86.10 % \\ GO:0000166-IEA;GO:0048544-IEA;GO:0016020-IEA;GO:0016021-IEA;GO:0016310-IEA;GO:0016740-IEA;GO:0004672-IEA;GO:0016301-IEA;GO:0004674-IEA;GO:0005524-IEA;GO:0006468-IEA \\ nucleotide binding-IEA;		WRKY domain	TRINITY_DN1510_c0_g1	FvH4_5g06220.1	1.2145	9.92825	8.71375	8.17476	0.0277264	1	thaumatin-like protein 1b \\ 2.90E-17 \\ 55.96 % \\ GO:0016020-IEA;GO:0016021-IEA \\ membrane-IEA;integral component of membrane-IEA		Thaumatin
TRINITY_DN146800_c1_g1	FvH4_2g28100.1	0.177	1.967	1.79	11.113	0.000113315	0.0571339	hypothetical protein RchiOBHm_Chr6g0297031 \\ 7.50E-56 \\ 94.49 % \\ GO:0007165-IEA;GO:0007186-IEA \\ signal transduction-IEA;G protein-coupled receptor signaling pathway-IEA \\ GO:0007186 \\ G protein-coupled receptor signaling pathway			TRINITY_DN156_c0_g1	FvH4_4g02990.1	1.445	11.784	10.339	8.15502	2.12365e-05	0.0317588	cellulose synthase-like protein G2 isoform X1 \\ 0.00E+00 \\ 84.66 % \\ GO:0016757-IEA;GO:0016020-IEA;GO:0016021-IEA;GO:0016760-IEA;GO:0071555-IEA;GO:0016740-IEA;GO:0030244-IEA \\ transferase activity, transferring glycosyl groups-IEA;membrane-IEA;integra		Cellulose synthase
TRINITY_DN4269_c0_g3	FvH4_2g33250.1	6.6565	73.9175	67.261	11.1046	0.00601104	0.493484	zinc finger protein ZAT10-like \\ 7.80E-06 \\ 86.11 %		Zinc finger C2H2-type	TRINITY_DN292_c1_g1	FvH4_1g24170.1	0.3525	2.85275	2.50025	8.09291	0.0303479	1	putative cysteine desulfurase \\ 0.00E+00 \\ 84.00 % \\ GO:0031071-IEA;GO:0003824-IEA;GO:0016020-IEA;GO:0008483-IEA;GO:0016021-IEA;GO:0016740-IEA \\ cysteine desulfurase activity-IEA;catalytic activity-IEA;membrane-IEA;transaminase activity-IEA;integral c		Aminotransferase class V domain
TRINITY_DN7613_c0_g1	FvH4_1g26490.1	6.623	72.6397	66.0167	10.9678	0.0158689	0.84632	putative transcription factor WD40-like family \\ 0.00E+00 \\ 84.75 % \\ GO:0008233-IEA;GO:0006508-IEA \\ peptidase activity-IEA;proteolysis-IEA \\ GO:0006508;GO:0008233 \\ proteolysis;peptidase activity		WD40-like Beta Propeller	TRINITY_DN19381_c0_g1	FvH4_2g30510.1	0.1335	1.0795	0.946	8.08614	0.00535339	0.490401	primary amine oxidase-like \\ 0.00E+00 \\ 86.58 % \\ GO:0016491-IEA;GO:0046872-IEA;GO:0048038-IEA;GO:0005507-IEA;GO:0005507-IBA;GO:0008131-IEA;GO:0008131-IBA;GO:0055114-IEA;GO:0009308-IEA;GO:0009308-IBA \\ oxidoreductase activity-IEA;metal ion binding-IEA	primary-amine oxidase [EC:1.4.3.21]	Copper amine oxidase
TRINITY_DN58526_c0_g1	FvH4_5g02030.1	0.0995	1.0865	0.987	10.9196	0.00301354	0.338208	protein LURP-one-related 4 \\ 3.90E-28 \\ 91.17 % \\ GO:0016310-IEA;GO:0004672-IEA;GO:0016740-IEA;GO:0016301-IEA;GO:0004674-IEA;GO:0005524-IEA;GO:0006468-IEA \\ phosphorylation-IEA;protein kinase activity-IEA;transferase activity-IEA;kinase activity-IEA;p		LURP-one-related	TRINITY_DN1990_c1_g1	FvH4_7g22200.1	0.18275	1.47425	1.2915	8.06703	0.00284754	0.355879	CASP-like protein 4D1 \\ 7.00E-16 \\ 74.25 % \\ GO:0003954-IEA;GO:0003954-IBA;GO:0005747-IBA;GO:0046872-IEA;GO:0016491-IEA;GO:0005739-IEA;GO:0048038-IEA;GO:0055114-IEA;GO:0070469-IEA;GO:0051539-IEA;GO:0032981-IBA;GO:0009060-IBA;GO:0051536-IEA;GO:0015990-I		Domain of unknown function DUF588
TRINITY_DN4829_c0_g1	FvH4_4g33670.1	1.454	15.8615	14.4075	10.9089	0.000487962	0.129866	PREDICTED: uncharacterized protein LOC105351168 \\ 0.00E+00 \\ 71.24 % \\ GO:0003677-IEA;GO:0006355-IEA;GO:0005634-IEA \\ DNA binding-IEA;regulation of transcription, DNA-templated-IEA;nucleus-IEA \\ GO:0003677;GO:0005634;GO:0006355 \\ DNA binding;nucleus			TRINITY_DN2834_c0_g1	FvH4_6g28650.1	7.8545	62.7185	54.864	7.98504	0.000370571	0.12465	probable WRKY transcription factor 40 \\ 2.90E-72 \\ 87.96 % \\ GO:0003677-IEA;GO:0003700-IEA;GO:0006355-IEA;GO:0043565-IEA;GO:0005634-IEA \\ DNA binding-IEA;DNA-binding transcription factor activity-IEA;regulation of transcription, DNA-templated-IEA;sequ		WRKY domain
TRINITY_DN4010_c0_g1	FvH4_5g32810.1	0.8825	9.59425	8.71175	10.8717	0.00413341	0.403843	putative powdery mildew resistance protein, RPW8 \\ 0.00E+00 \\ 79.04 % \\ GO:0005618-IEA;GO:0045330-IEA;GO:0071555-IEA;GO:0030599-IEA;GO:0005576-IEA;GO:0042545-IEA;GO:0045490-IEA;GO:0016787-IEA;GO:0005975-IEA;GO:0030248-IEA \\ cell wall-IEA;aspartyl este		Powdery mildew resistance protein, RPW8 domain	TRINITY_DN18403_c0_g1	FvH4_2g05370.1	23.0127	183.556	160.543	7.97627	6.52804e-05	0.0522362	peroxidase 44 \\ 1.10E-05 \\ 100.00 %	peroxidase [EC:1.11.1.7]	Plant peroxidase
TRINITY_DN2944_c1_g1	FvH4_2g26150.1	2.2775	24.4845	22.207	10.7506	8.71855e-05	0.0501944	probable polygalacturonase isoform X1 \\ 0.00E+00 \\ 90.42 % \\ GO:0008152-IEA;GO:0016020-IEA;GO:0016021-IEA;GO:0047911-IEA;GO:0071555-IEA;GO:0004650-IEA;GO:0005576-IEA;GO:0016787-IEA;GO:0016798-IEA;GO:0005975-IEA \\ metabolic process-IEA;membrane-IEA;int		Glycoside hydrolase, family 28	TRINITY_DN15802_c0_g1	FvH4_2g34060.1	2.47	19.6552	17.1852	7.95759	3.35915e-05	0.0384704	uncharacterized acetyltransferase At3g50280-like \\ 0.00E+00 \\ 85.97 % \\ GO:0016746-IEA;GO:0016747-IEA;GO:0016740-IEA;GO:0047172-IEA \\ transferase activity, transferring acyl groups-IEA;transferase activity, transferring acyl groups other than amino-ac		Transferase
TRINITY_DN20323_c0_g1	FvH4_7g33640.1	2.53725	27.168	24.6307	10.7077	0.000259373	0.0916574	(-)-germacrene D synthase-like \\ 0.00E+00 \\ 81.18 % \\ GO:0000287-IEA;GO:0046872-IEA;GO:0016829-IEA;GO:0010333-IEA \\ magnesium ion binding-IEA;metal ion binding-IEA;lyase activity-IEA;terpene synthase activity-IEA \\ GO:0000287;GO:0010333 \\ magnesium	(-)-germacrene D synthase [EC:4.2.3.75]	Terpene synthase, N-terminal domain	TRINITY_DN13156_c0_g1	FvH4_2g39450.1	0.1285	1.01975	0.89125	7.9358	0.000317583	0.114698	jasmonate O-methyltransferase-like \\ 0.00E+00 \\ 88.61 % \\ GO:0008150-ND;GO:0005575-ND;GO:0003674-ND \\ biological_process-ND;cellular_component-ND;molecular_function-ND	jasmonate O-methyltransferase [EC:2.1.1.141]	SAM dependent carboxyl methyltransferase
TRINITY_DN1537_c0_g6	FvH4_6g35370.1	0.45425	4.818	4.36375	10.6065	0.00616103	0.499744	---NA--- \\ 0.00E+00 \\ 82.48 % \\ GO:0016020-IEA;GO:0016021-IEA;GO:0008168-IEA;GO:0016740-IEA;GO:0032259-IEA \\ membrane-IEA;integral component of membrane-IEA;methyltransferase activity-IEA;transferase activity-IEA;methylation-IEA \\ GO:0008168;GO:00160			TRINITY_DN11091_c0_g3	FvH4_1g02880.1	8.0585	63.9365	55.878	7.93404	0.00358244	0.401056	umecyanin-like \\ 2.00E-93 \\ 76.83 % \\ GO:0061630-IBA;GO:0016746-IEA;GO:0008270-IEA;GO:0046872-IEA;GO:0004839-IEA;GO:0016740-IEA;GO:0016874-IEA;GO:0016567-IEA;GO:0006511-IBA \\ ubiquitin protein ligase activity-IBA;transferase activity, transferring acy		Phytocyanin domain
TRINITY_DN2726_c2_g1	FvH4_1g23370.1	0.1315	1.3935	1.262	10.597	7.24206e-06	0.0167026	G-type lectin S-receptor-like serine/threonine-protein kinase LECRK3 \\ 0.00E+00 \\ 77.97 % \\ GO:0000166-IEA;GO:0048544-IEA;GO:0016020-IEA;GO:0016021-IEA;GO:0016310-IEA;GO:0004672-IEA;GO:0016740-IEA;GO:0016301-IEA;GO:0004674-IEA;GO:0030246-IEA;GO:0005524		Protein kinase domain	TRINITY_DN12592_c0_g1	FvH4_5g03320.1	53.1165	419.372	366.255	7.89532	0.000288408	0.109617	late embryogenesis abundant protein At1g64065-like \\ 9.80E-57 \\ 59.91 %		Late embryogenesis abundant protein, LEA-14
TRINITY_DN34360_c0_g1	FvH4_6g10510.1	1.448	15.245	13.797	10.5283	1.99372e-06	0.00930613	probable WRKY transcription factor 33 \\ 0.00E+00 \\ 72.73 % \\ GO:0003677-IEA;GO:0003700-IEA;GO:0006355-IEA;GO:0043565-IEA;GO:0005634-IEA \\ DNA binding-IEA;DNA-binding transcription factor activity-IEA;regulation of transcription, DNA-templated-IEA;sequ	WRKY transcription factor 33	WRKY domain	TRINITY_DN2269_c0_g1	FvH4_6g20570.1	0.789	6.21375	5.42475	7.87548	0.00148335	0.251501	polyphenol oxidase, chloroplastic-like \\ 0.00E+00 \\ 84.13 % \\ GO:0009507-IEA;GO:0016491-IEA;GO:0046872-IEA;GO:0004097-IEA;GO:0009579-IEA;GO:0055114-IEA;GO:0046148-IEA;GO:0009543-IEA;GO:0009536-IEA \\ chloroplast-IEA;oxidoreductase activity-IEA;metal io	polyphenol oxidase [EC:1.10.3.1]	Tyrosinase copper-binding domain
TRINITY_DN11695_c1_g1	FvH4_3g02010.1	3.89575	40.8083	36.9125	10.4751	0.0193834	0.942018	---NA---			TRINITY_DN28_c0_g2	FvH4_7g20060.1	4.08475	31.8493	27.7645	7.79711	0.000447293	0.137982	uncharacterized protein LOC112182463 \\ 0.00E+00 \\ 91.54 % \\ GO:0006979-IEA;GO:0004601-IEA;GO:0046872-IEA;GO:0016491-IEA;GO:0020037-IEA;GO:0055114-IEA;GO:0098869-IEA;GO:0005576-IEA;GO:0042744-IEA \\ response to oxidative stress-IEA;peroxidase activity-I
TRINITY_DN6110_c0_g1	FvH4_7g01730.1	2.46575	25.804	23.3383	10.465	0.0207982	0.978963	protein BPS1, chloroplastic-like \\ 0.00E+00 \\ 81.22 % \\ GO:0003677-IEA;GO:0003700-IEA;GO:0006351-IEA;GO:0046983-IEA;GO:0006355-IEA;GO:0000977-IEA;GO:0005634-IEA;GO:0045944-IEA \\ DNA binding-IEA;DNA-binding transcription factor activity-IEA;transcripti		Protein BYPASS-related	TRINITY_DN928_c2_g1	FvH4_3g23100.1	0.19375	1.49075	1.297	7.69419	0.000462567	0.140535	L-type lectin-domain containing receptor kinase IX.1-like \\ 0.00E+00 \\ 81.14 % \\ GO:0016020-IEA;GO:0016021-IEA;GO:0016740-IEA;GO:0004672-IEA;GO:0030246-IEA;GO:0005524-IEA;GO:0006468-IEA \\ membrane-IEA;integral component of membrane-IEA;transferase act		Protein kinase domain
TRINITY_DN3476_c0_g2	FvH4_5g36920.1	0.92875	9.7055	8.77675	10.4501	0.000109983	0.0561655	protein EXORDIUM-like \\ 0.00E+00 \\ 92.51 % \\ GO:0016020-IEA;GO:0016021-IEA;GO:0055114-IEA \\ membrane-IEA;integral component of membrane-IEA;oxidation-reduction process-IEA \\ GO:0016021;GO:0055114 \\ integral component of membrane;oxidation-reduction		Protein EXORDIUM-like	TRINITY_DN237671_c0_g1	FvH4_2g33680.1	4.19825	31.4525	27.2542	7.49181	0.00212169	0.303734	Transmembrane protein
TRINITY_DN4620_c0_g1	FvH4_7g28170.1	0.17025	1.7735	1.60325	10.417	0.000533162	0.13597	nuclear polyadenylated RNA-binding protein 3-like \\ 2.60E-06 \\ 83.98 %			TRINITY_DN6010_c0_g1	FvH4_5g36280.1	3.39825	25.4292	22.031	7.48304	1.49938e-05	0.0279636	PREDICTED: uncharacterized protein LOC101306919 \\ 5.90E-18 \\ 82.60 %
TRINITY_DN3307_c0_g1	FvH4_5g11250.1	2.30225	23.8923	21.59	10.3778	2.16527e-06	0.00946965	protein SAR DEFICIENT 1 \\ 0.00E+00 \\ 86.14 % \\ GO:0005516-IEA \\ calmodulin binding-IEA \\ GO:0005516 \\ calmodulin binding		Powdery mildew resistance protein, RPW8 domain	TRINITY_DN12399_c0_g1	FvH4_4g24820.1	0.30875	2.2815	1.97275	7.38947	0.0028853	0.358162	DELLA protein RGL1-like \\ 0.00E+00 \\ 83.61 % \\ GO:0003700-IBA;GO:0052689-IEA;GO:0006355-IEA;GO:0043565-IBA;GO:0016787-IEA;GO:0005634-IBA \\ DNA-binding transcription factor activity-IBA;carboxylic ester hydrolase activity-IEA;regulation of transcriptio		Transcription factor GRAS
TRINITY_DN4437_c0_g1	FvH4_7g32500.1	5.28675	54.527	49.2403	10.3139	3.15983e-07	0.00442476	AAA-ATPase At2g46620-like \\ 0.00E+00 \\ 86.75 % \\ GO:0016020-IEA;GO:0016021-IEA;GO:0005524-IEA \\ membrane-IEA;integral component of membrane-IEA;ATP binding-IEA \\ GO:0005524;GO:0016021 \\ ATP binding;integral component of membrane	mitochondrial chaperone BCS1	AAA+ ATPase domain	TRINITY_DN6775_c1_g1	FvH4_4g29210.1	2.84525	21.0023	18.157	7.38151	4.54255e-08	0.00199918	hypothetical protein RchiOBHm_Chr4g0437271
TRINITY_DN6361_c0_g1	FvH4_5g00680.1	1.51625	15.395	13.8788	10.1533	7.19564e-05	0.0451479	putative S-adenosyl-L-methionine-dependent methyltransferase \\ 1.90E-11 \\ 48.34 % \\ GO:0003964-IEA;GO:0016779-IEA;GO:0090502-IEA;GO:0006278-IEA;GO:0016740-IEA;GO:0004523-IEA;GO:0003676-IEA \\ RNA-directed DNA polymerase activity-IEA;nucleotidyltransfer		Protein of unknown function DUF1442	TRINITY_DN12556_c0_g1	FvH4_5g34510.1	1.2135	8.95625	7.74275	7.38051	0.00169249	0.270833	UDP-glycosyltransferase 91C1 \\ 0.00E+00 \\ 79.84 % \\ GO:0016757-IEA;GO:0016758-IEA;GO:0047213-IEA;GO:0016020-IEA;GO:0005829-IEA;GO:0016021-IEA;GO:0016740-IEA;GO:0102241-IEA \\ transferase activity, transferring glycosyl groups-IEA;transferase activity,		UDP-glucuronosyl/UDP-glucosyltransferase
TRINITY_DN3195_c0_g1	FvH4_5g03710.1	39.2715	398.534	359.262	10.1482	0.000629926	0.147351	disease resistance response protein 206-like		Dirigent protein	TRINITY_DN199383_c0_g1	FvH4_6g45100.1	1.083	7.99025	6.90725	7.37789	0.00359669	0.401461	NDR1/HIN1-like protein 6
TRINITY_DN41773_c0_g2	FvH4_2g25280.1	0.106	1.07425	0.96825	10.1344	0.00206227	0.281615	desiccation-related protein PCC13-62 \\ 7.60E-34 \\ 65.53 % \\ GO:0003824-IEA;GO:0016020-IEA;GO:0016021-IEA \\ catalytic activity-IEA;membrane-IEA;integral component of membrane-IEA		Ferritin-like	TRINITY_DN21_c0_g3	FvH4_1g20390.1	0.29925	2.2065	1.90725	7.37343	4.89764e-05	0.0454463	ABC transporter G family member 11-like \\ 0.00E+00 \\ 87.63 % \\ GO:0000166-IEA;GO:0042626-IBA;GO:0055085-IBA;GO:0015411-IEA;GO:0016020-IEA;GO:0016021-IEA;GO:0005524-IEA;GO:0016787-IEA;GO:0015734-IEA;GO:0016887-IEA;GO:0005886-IBA \\ nucleotide binding-IE		ABC transporter-like
TRINITY_DN2295_c0_g2	FvH4_4g02880.1	1.22075	12.3185	11.0977	10.0909	0.0428996	1	glu S.griseus protease inhibitor-like		Proteinase inhibitor I13, potato inhibitor I	TRINITY_DN3613_c0_g1	FvH4_5g11730.1	1.99925	14.7178	12.7185	7.36164	8.55272e-07	0.00925697	endoglucanase 25-like \\ 0.00E+00 \\ 83.76 % \\ GO:0003824-IEA;GO:0000272-IEA;GO:0016020-IEA;GO:0016021-IEA;GO:0030245-IEA;GO:0016740-IEA;GO:0030247-IEA;GO:0016798-IEA;GO:0016787-IEA;GO:0008152-IEA;GO:0004672-IEA;GO:0004553-IEA;GO:0005524-IEA;GO:0005975-I	endoglucanase [EC:3.2.1.4]	Glycoside hydrolase family 9
TRINITY_DN1949_c1_g1	FvH4_3g18370.1	29.9135	301.323	271.41	10.0732	0.00330575	0.357084	epidermis-specific secreted glycoprotein EP1-like \\ 0.00E+00 \\ 86.95 % \\ GO:0030246-IEA \\ carbohydrate binding-IEA \\ GO:0030246 \\ carbohydrate binding		Bulb-type lectin domain	TRINITY_DN298070_c0_g1	FvH4_2g32750.1	3.99075	29.2893	25.2985	7.33928	0.0250834	1	phytosulfokines 3
TRINITY_DN22388_c0_g2	FvH4_4g03610.1	2.54475	25.146	22.6013	9.88152	2.44891e-05	0.0246004	myb-related protein Myb4-like \\ 6.40E-91 \\ 73.96 % \\ GO:0003677-IEA;GO:0016020-IEA;GO:0016021-IEA;GO:0044212-IBA;GO:0030154-IBA;GO:0043565-IBA;GO:0005634-IBA \\ DNA binding-IEA;membrane-IEA;integral component of membrane-IEA;transcription regulatory re	transcription factor MYB, plant	SANT/Myb domain	TRINITY_DN20434_c0_g1	FvH4_1g00150.1	1.80475	13.2305	11.4257	7.33093	0.000161731	0.0804917	uncharacterized protein LOC112190620 \\ 0.00E+00 \\ 85.03 % \\ GO:0016757-IEA;GO:0016758-IEA;GO:0016740-IEA \\ transferase activity, transferring glycosyl groups-IEA;transferase activity, transferring hexosyl groups-IEA;transferase activity-IEA \\ GO:0016
TRINITY_DN12729_c0_g1	FvH4_6g12390.1	5.361	52.694	47.333	9.82914	0.000766896	0.161576	PAR1 protein		PAR1	TRINITY_DN4258_c0_g1	FvH4_4g01290.1	1.17025	8.5395	7.36925	7.29716	0.00240423	0.325713	early light-induced protein 1, chloroplastic-like \\ 0.00E+00 \\ 89.54 % \\ GO:0000166-IEA;GO:0045261-IEA;GO:0005739-IEA;GO:0046961-IEA;GO:0046034-IEA;GO:0016020-IEA;GO:0016787-IEA;GO:0015986-IEA;GO:0016887-IEA;GO:0043531-IEA;GO:1902600-IEA;GO:0042776-IEA		Chlorophyll A-B binding protein
TRINITY_DN2390_c0_g1	FvH4_6g03170.1	18.3665	180.107	161.74	9.80626	2.03242e-05	0.0225278	neurogenic locus notch-like protein \\ 8.20E-90 \\ 72.23 %			TRINITY_DN5566_c1_g1	FvH4_7g30730.1	0.6305	4.59325	3.96275	7.28509	0.00408293	0.429276	protein DETOXIFICATION 27-like \\ 0.00E+00 \\ 91.47 % \\ GO:0055085-IEA;GO:0016020-IEA;GO:0015297-IEA;GO:0016021-IEA;GO:0006855-IEA;GO:0015238-IEA \\ transmembrane transport-IEA;membrane-IEA;antiporter activity-IEA;integral component of membrane-IEA;drug		Multi antimicrobial extrusion protein
TRINITY_DN721_c0_g1	FvH4_7g30310.1	26.4318	258.178	231.746	9.7677	2.52404e-05	0.0246879	heavy metal-associated isoprenylated plant protein 3-like isoform X1 \\ 2.50E-24 \\ 78.87 % \\ GO:0007165-IEA;GO:0016020-IEA;GO:0016021-IEA;GO:0043531-IEA;GO:0016787-IEA \\ signal transduction-IEA;membrane-IEA;integral component of membrane-IEA;ADP bindin		Heavy metal-associated domain, HMA	TRINITY_DN6361_c0_g1	FvH4_5g00680.1	2.11675	15.395	13.2782	7.27294	8.89426e-05	0.0598855	putative S-adenosyl-L-methionine-dependent methyltransferase \\ 1.90E-11 \\ 48.34 % \\ GO:0003964-IEA;GO:0016779-IEA;GO:0090502-IEA;GO:0006278-IEA;GO:0016740-IEA;GO:0004523-IEA;GO:0003676-IEA \\ RNA-directed DNA polymerase activity-IEA;nucleotidyltransfer		Protein of unknown function DUF1442
TRINITY_DN10829_c0_g1	FvH4_4g04740.1	0.877	8.3635	7.4865	9.53649	0.0098741	0.651315	putative EF-hand domain pair protein \\ 8.50E-60 \\ 86.89 % \\ GO:0005504-IEA;GO:0009627-IEA \\ fatty acid binding-IEA;systemic acquired resistance-IEA \\ GO:0005504;GO:0009627 \\ fatty acid binding;systemic acquired resistance		EF-hand domain	TRINITY_DN4010_c0_g1	FvH4_5g32810.1	1.32675	9.59425	8.2675	7.23139	0.00576865	0.513033	putative powdery mildew resistance protein, RPW8 \\ 0.00E+00 \\ 79.04 % \\ GO:0005618-IEA;GO:0045330-IEA;GO:0071555-IEA;GO:0030599-IEA;GO:0005576-IEA;GO:0042545-IEA;GO:0045490-IEA;GO:0016787-IEA;GO:0005975-IEA;GO:0030248-IEA \\ cell wall-IEA;aspartyl este		Powdery mildew resistance protein, RPW8 domain
TRINITY_DN5024_c0_g1	FvH4_3g13600.1	0.98175	9.33625	8.3545	9.5098	6.62117e-05	0.0433426	receptor-like protein EIX2 \\ 0.00E+00 \\ 75.02 % \\ GO:0016020-IEA;GO:0016021-IEA;GO:0016310-IEA;GO:0016740-IEA;GO:0016301-IEA;GO:0004674-IEA;GO:0006468-IEA \\ membrane-IEA;integral component of membrane-IEA;phosphorylation-IEA;transferase activity-IEA;k		Leucine-rich repeat	TRINITY_DN17407_c0_g2	FvH4_2g23400.1	0.16275	1.17575	1.013	7.22427	0.00889691	0.64174	ent-copalyl diphosphate synthase, chloroplastic-like \\ 0.00E+00 \\ 79.82 % \\ GO:0000287-IEA;GO:0009905-IEA;GO:0016829-IEA;GO:0010333-IEA;GO:0016853-IEA \\ magnesium ion binding-IEA;ent-copalyl diphosphate synthase activity-IEA;lyase activity-IEA;terpene	ent-copalyl diphosphate synthase [EC:5.5.1.13]	Terpene synthase, N-terminal domain
TRINITY_DN3613_c0_g1	FvH4_5g11730.1	1.55775	14.7178	13.16	9.44808	6.21741e-07	0.00580423	endoglucanase 25-like \\ 0.00E+00 \\ 83.76 % \\ GO:0003824-IEA;GO:0000272-IEA;GO:0016020-IEA;GO:0016021-IEA;GO:0030245-IEA;GO:0016740-IEA;GO:0030247-IEA;GO:0016798-IEA;GO:0016787-IEA;GO:0008152-IEA;GO:0004672-IEA;GO:0004553-IEA;GO:0005524-IEA;GO:0005975-I	endoglucanase [EC:3.2.1.4]	Glycoside hydrolase family 9	TRINITY_DN14564_c0_g1	FvH4_4g15150.1	6.69775	48.3678	41.67	7.22149	0.00337852	0.388076	sugar transport protein 13-like \\ 0.00E+00 \\ 93.79 % \\ GO:0055085-IEA;GO:0016020-IEA;GO:0016021-IEA;GO:0008643-IEA;GO:0022857-IEA;GO:0005215-IEA \\ transmembrane transport-IEA;membrane-IEA;integral component of membrane-IEA;carbohydrate transport-IEA;t		Sugar/inositol transporter
TRINITY_DN3172_c0_g1	FvH4_3g00840.1	2.10725	19.8513	17.744	9.42045	0.000320054	0.101544	probable xyloglucan endotransglucosylase/hydrolase protein 23 \\ 8.20E-07 \\ 80.55 %	xyloglucan:xyloglucosyl transferase TCH4 [EC:2.4.1.207]	Glycoside hydrolase family 16	TRINITY_DN4829_c0_g1	FvH4_4g33670.1	2.20125	15.8615	13.6603	7.20568	0.000657219	0.162261	PREDICTED: uncharacterized protein LOC105351168 \\ 0.00E+00 \\ 71.24 % \\ GO:0003677-IEA;GO:0006355-IEA;GO:0005634-IEA \\ DNA binding-IEA;regulation of transcription, DNA-templated-IEA;nucleus-IEA \\ GO:0003677;GO:0005634;GO:0006355 \\ DNA binding;nucleus
TRINITY_DN259937_c0_g1	FvH4_7g20000.1	11.0095	103.489	92.4792	9.39995	0.0012896	0.21532	hypothetical protein RchiOBHm_Chr1g0363951 \\ 0.00E+00 \\ 91.87 % \\ GO:0000166-IEA;GO:0016310-IEA;GO:0004672-IEA;GO:0016301-IEA;GO:0004674-IEA;GO:0005524-IEA;GO:0006468-IEA \\ nucleotide binding-IEA;phosphorylation-IEA;protein kinase activity-IEA;kinase			TRINITY_DN5024_c0_g2	FvH4_3g13480.1	0.2745	1.97775	1.70325	7.20492	6.4469e-06	0.0187368	receptor-like protein EIX2 \\ 0.00E+00 \\ 72.10 % \\ GO:0016020-IEA;GO:0016021-IEA;GO:0016310-IEA;GO:0016740-IEA;GO:0016301-IEA;GO:0004674-IEA;GO:0006468-IEA \\ membrane-IEA;integral component of membrane-IEA;phosphorylation-IEA;transferase activity-IEA;k		Leucine-rich repeat
TRINITY_DN12399_c0_g1	FvH4_4g24820.1	0.244	2.2815	2.0375	9.35041	0.00253787	0.312487	DELLA protein RGL1-like \\ 0.00E+00 \\ 83.61 % \\ GO:0003700-IBA;GO:0052689-IEA;GO:0006355-IEA;GO:0043565-IBA;GO:0016787-IEA;GO:0005634-IBA \\ DNA-binding transcription factor activity-IBA;carboxylic ester hydrolase activity-IEA;regulation of transcriptio		Transcription factor GRAS	TRINITY_DN4121_c0_g1	FvH4_7g04820.1	0.758	5.45375	4.69575	7.19492	0.00101018	0.205675	protein ZINC INDUCED FACILITATOR-LIKE 1-like isoform X1 \\ 0.00E+00 \\ 89.41 % \\ GO:0055085-IEA;GO:0016020-IEA;GO:0016021-IEA;GO:0005215-IEA \\ transmembrane transport-IEA;membrane-IEA;integral component of membrane-IEA;transporter activity-IEA \\ GO:000		Major facilitator superfamily
TRINITY_DN6404_c0_g1	FvH4_3g43440.1	0.80825	7.54825	6.74	9.339	3.24366e-05	0.0283885	G-type lectin S-receptor-like serine/threonine-protein kinase LECRK2 \\ 0.00E+00 \\ 81.50 % \\ GO:0000166-IEA;GO:0016020-IEA;GO:0016021-IEA;GO:0016310-IEA;GO:0004672-IEA;GO:0016740-IEA;GO:0016301-IEA;GO:0004674-IEA;GO:0005524-IEA;GO:0006468-IEA \\ nucleot		Protein kinase domain	TRINITY_DN6349_c0_g1	FvH4_6g33590.1	25.6808	184.476	158.795	7.18344	6.06741e-05	0.0509932	beta-fructofuranosidase, insoluble isoenzyme CWINV1-like \\ 0.00E+00 \\ 87.67 % \\ GO:0008152-IEA;GO:0004553-IEA;GO:0004564-IEA;GO:0016787-IEA;GO:0005975-IEA;GO:0016798-IEA \\ metabolic process-IEA;hydrolase activity, hydrolyzing O-glycosyl compounds-IEA;	beta-fructofuranosidase [EC:3.2.1.26]	Glycoside hydrolase, family 32
TRINITY_DN9365_c0_g1	FvH4_5g02710.1	2.6065	24.2397	21.6332	9.29973	0.000425379	0.119519	BTB/POZ domain-containing protein At5g41330 \\ 0.00E+00 \\ 99.03 % \\ GO:0003743-IEA;GO:0000166-IEA;GO:0003723-IEA;GO:0005737-IEA;GO:0004386-IEA;GO:0004004-IEA;GO:0005524-IEA;GO:0016787-IEA;GO:0006412-IEA;GO:0003676-IEA;GO:0006413-IEA \\ translation initi		BTB/POZ domain	TRINITY_DN1073_c3_g1	FvH4_5g02050.1	1.302	9.3505	8.0485	7.18164	2.99663e-05	0.0362253	putative methyltransferase DDB_G0268948 \\ 1.80E-128 \\ 80.37 %		Lipopolysaccharide-modifying protein
TRINITY_DN4034_c0_g1	FvH4_6g40280.1	5.61325	52.1067	46.4935	9.28281	7.3501e-05	0.0456521	heavy metal-associated isoprenylated plant protein 39-like			TRINITY_DN3632_c0_g3	FvH4_2g35330.1	7.46325	53.524	46.0607	7.17167	0.00105915	0.210647	NADP-dependent malic enzyme isoform X1 \\ 0.00E+00 \\ 94.20 % \\ GO:0051287-IEA;GO:0016491-IEA;GO:0046872-IEA;GO:0004471-IEA;GO:0004470-IEA;GO:0055114-IEA \\ NAD binding-IEA;oxidoreductase activity-IEA;metal ion binding-IEA;malate dehydrogenase (decarboxy	malate dehydrogenase (oxaloacetate-decarboxylating)(NADP+) [EC:1.1.1.40]	Malic oxidoreductase
TRINITY_DN4968_c2_g1	FvH4_7g25530.1	13.3795	124.189	110.809	9.28204	1.00805e-05	0.019655	hypoxia-responsive family protein \\ 0.00E+00 \\ 87.66 % \\ GO:0055085-IEA;GO:0016020-IEA;GO:0016021-IEA;GO:0022857-IEA \\ transmembrane transport-IEA;membrane-IEA;integral component of membrane-IEA;transmembrane transporter activity-IEA \\ GO:0016021;GO:			TRINITY_DN7446_c0_g1	FvH4_2g40880.1	4.55975	32.466	27.9062	7.12013	0.00705768	0.572023	acidic mammalian chitinase-like \\ 0.00E+00 \\ 81.11 % \\ GO:0008152-IEA;GO:0004568-IEA;GO:0008061-IEA;GO:0004553-IEA;GO:0016787-IEA;GO:0005975-IEA;GO:0016798-IEA \\ metabolic process-IEA;chitinase activity-IEA;chitin binding-IEA;hydrolase activity, hydro	chitinase [EC:3.2.1.14]	Glycoside hydrolase family 18, catalytic domain
TRINITY_DN13194_c0_g1	FvH4_7g21880.1	5.05325	46.8073	41.754	9.2628	8.75539e-05	0.0501944	zinc finger protein ZAT12-like \\ 2.60E-156 \\ 80.19 % \\ GO:0000166-IEA;GO:0016020-IEA;GO:0016021-IEA;GO:0016310-IEA;GO:0004672-IEA;GO:0030247-IEA;GO:0016301-IEA;GO:0008889-IEA;GO:0004674-IEA;GO:0005524-IEA;GO:0016787-IEA;GO:0006468-IEA \\ nucleotide bin		Zinc finger C2H2-type	TRINITY_DN14579_c0_g1	FvH4_4g28510.1	0.47875	3.39225	2.9135	7.08564	5.76551e-07	0.00822729	E3 ubiquitin-protein ligase RHA2B-like \\ 5.80E-164 \\ 80.48 % \\ GO:0016020-IEA;GO:0016021-IEA;GO:0016310-IEA;GO:0016740-IEA;GO:0016301-IEA;GO:0004674-IEA;GO:0006468-IEA \\ membrane-IEA;integral component of membrane-IEA;phosphorylation-IEA;transferase a	E3 ubiquitin-protein ligase RHA2 [EC:2.3.2.27]	Zinc finger, RING-type
TRINITY_DN7001_c0_g1	FvH4_3g10940.1	5.8115	53.0853	47.2737	9.13452	1.95154e-06	0.00927909	tetrahydrocannabinolic acid synthase-like \\ 0.00E+00 \\ 86.32 % \\ GO:0071949-IEA;GO:0050660-IEA;GO:0003824-IEA;GO:0016491-IEA;GO:0055114-IEA;GO:0050328-IEA \\ FAD binding-IEA;flavin adenine dinucleotide binding-IEA;catalytic activity-IEA;oxidoreductase		FAD linked oxidase, N-terminal	TRINITY_DN6962_c0_g1	FvH4_3g04020.1	2.21125	15.5497	13.3385	7.03211	0.000155344	0.0780697	F-box protein At1g61340-like \\ 5.50E-31 \\ 69.17 % \\ GO:0016020-IEA;GO:0016021-IEA \\ membrane-IEA;integral component of membrane-IEA \\ GO:0016020 \\ membrane		F-box domain
TRINITY_DN5024_c0_g2	FvH4_3g13480.1	0.21675	1.97775	1.761	9.12457	4.49216e-06	0.0143511	receptor-like protein EIX2 \\ 0.00E+00 \\ 72.10 % \\ GO:0016020-IEA;GO:0016021-IEA;GO:0016310-IEA;GO:0016740-IEA;GO:0016301-IEA;GO:0004674-IEA;GO:0006468-IEA \\ membrane-IEA;integral component of membrane-IEA;phosphorylation-IEA;transferase activity-IEA;k		Leucine-rich repeat	TRINITY_DN34360_c0_g1	FvH4_6g10510.1	2.172	15.245	13.073	7.01888	3.49213e-06	0.0149419	probable WRKY transcription factor 33 \\ 0.00E+00 \\ 72.73 % \\ GO:0003677-IEA;GO:0003700-IEA;GO:0006355-IEA;GO:0043565-IEA;GO:0005634-IEA \\ DNA binding-IEA;DNA-binding transcription factor activity-IEA;regulation of transcription, DNA-templated-IEA;sequ	WRKY transcription factor 33	WRKY domain
TRINITY_DN68_c1_g1	FvH4_5g14810.1	0.679	6.1235	5.4445	9.01841	9.65243e-05	0.0525578	probable calcium-binding protein CML45 \\ 1.70E-124 \\ 74.38 % \\ GO:0048046-IEA;GO:0005576-IEA \\ apoplast-IEA;extracellular region-IEA \\ GO:0005576 \\ extracellular region	calmodulin	EF-hand domain	TRINITY_DN37706_c1_g2	FvH4_3g16620.1	0.25325	1.77675	1.5235	7.01579	2.9633e-06	0.013425	VQ motif-containing protein 1-like \\ 1.20E-33 \\ 56.83 %		VQ
TRINITY_DN3759_c0_g1	FvH4_6g50750.1	1.0295	9.25975	8.23025	8.99441	8.85357e-05	0.0505096	L-aspartate oxidase, chloroplastic \\ 0.00E+00 \\ 92.21 % \\ GO:0005737-IEA;GO:0009507-IEA;GO:0016491-IEA;GO:0019363-IEA;GO:0009435-IEA;GO:0055114-IEA;GO:0008734-IEA;GO:0044318-IEA \\ cytoplasm-IEA;chloroplast-IEA;oxidoreductase activity-IEA;pyridine nucl	L-aspartate oxidase [EC:1.4.3.16]	FAD-dependent oxidoreductase 2, FAD binding domain	TRINITY_DN2944_c1_g1	FvH4_2g26150.1	3.5195	24.4845	20.965	6.95681	0.00014956	0.0767917	probable polygalacturonase isoform X1 \\ 0.00E+00 \\ 90.42 % \\ GO:0008152-IEA;GO:0016020-IEA;GO:0016021-IEA;GO:0047911-IEA;GO:0071555-IEA;GO:0004650-IEA;GO:0005576-IEA;GO:0016787-IEA;GO:0016798-IEA;GO:0005975-IEA \\ metabolic process-IEA;membrane-IEA;int		Glycoside hydrolase, family 28
TRINITY_DN21341_c0_g1	FvH4_2g22140.1	0.2175	1.9505	1.733	8.96782	0.0457827	1	---NA---			TRINITY_DN201987_c0_g1	FvH4_7g09310.1	2.111	14.685	12.574	6.95642	1.71132e-06	0.0125526	PGG domain containing protein \\ 1.90E-91 \\ 67.74 % \\ GO:0016020-IEA;GO:0016021-IEA \\ membrane-IEA;integral component of membrane-IEA		PGG domain
TRINITY_DN13271_c0_g1	FvH4_7g27760.1	1.7305	15.453	13.7225	8.92979	0.00112912	0.200374	pectinesterase 2-like \\ 0.00E+00 \\ 89.35 % \\ GO:0004857-IEA;GO:0005618-IEA;GO:0043086-IEA;GO:0045330-IEA;GO:0016020-IEA;GO:0016021-IEA;GO:0071555-IEA;GO:0030599-IEA;GO:0030599-IBA;GO:0045490-IEA;GO:0016787-IEA;GO:0046910-IBA;GO:0005576-IEA;GO:0042545-I	pectinesterase [EC:3.1.1.11]	Pectinesterase, catalytic	TRINITY_DN3220_c0_g1	FvH4_2g03250.1	2.20575	15.2735	13.0678	6.9244	2.34581e-05	0.0327002	UDP-glycosyltransferase 74G1-like \\ 0.00E+00 \\ 89.99 % \\ GO:0016757-IEA;GO:0016758-IEA;GO:0016740-IEA \\ transferase activity, transferring glycosyl groups-IEA;transferase activity, transferring hexosyl groups-IEA;transferase activity-IEA \\ GO:0016758	pathogen-inducible salicylic acid glucosyltransferase [EC:2.4.1.-]	UDP-glucuronosyl/UDP-glucosyltransferase
TRINITY_DN4704_c0_g1	FvH4_3g14400.1	0.3005	2.68075	2.38025	8.92097	0.00766596	0.56422	---NA---			TRINITY_DN13661_c0_g1	FvH4_2g04750.1	4.17775	28.9073	24.7295	6.91933	0.00836069	0.621195	probable indole-3-acetic acid-amido synthetase GH3.1 \\ 0.00E+00 \\ 93.72 %		GH3 family
TRINITY_DN19966_c0_g1	FvH4_6g54230.1	0.2325	2.066	1.8335	8.88602	0.000408829	0.117489	protein SDA1 homolog			TRINITY_DN230031_c0_g1	FvH4_4g30950.1	0.622	4.21675	3.59475	6.77934	3.76244e-05	0.0406622	galactoside 2-alpha-L-fucosyltransferase-like \\ 0.00E+00 \\ 78.87 % \\ GO:0016757-IEA;GO:0036065-IEA;GO:0016020-IEA;GO:0016021-IEA;GO:0016740-IEA;GO:0008107-IEA;GO:0042546-IEA \\ transferase activity, transferring glycosyl groups-IEA;fucosylation-IEA;mem	xyloglucan fucosyltransferase [EC:2.4.1.-]	Xyloglucan fucosyltransferase
TRINITY_DN28_c0_g2	FvH4_7g20060.1	3.60425	31.8493	28.245	8.83658	0.000424527	0.119519	uncharacterized protein LOC112182463 \\ 0.00E+00 \\ 91.54 % \\ GO:0006979-IEA;GO:0004601-IEA;GO:0046872-IEA;GO:0016491-IEA;GO:0020037-IEA;GO:0055114-IEA;GO:0098869-IEA;GO:0005576-IEA;GO:0042744-IEA \\ response to oxidative stress-IEA;peroxidase activity-I			TRINITY_DN8972_c0_g1	FvH4_2g38170.1	1.103	7.4575	6.3545	6.76111	4.77747e-05	0.0445998	pto-interacting protein 1-like isoform X1 \\ 0.00E+00 \\ 74.83 % \\ GO:0007178-IEA;GO:0016310-IEA;GO:0004672-IEA;GO:0016740-IEA;GO:0016301-IEA;GO:0004675-IBA;GO:0005524-IEA;GO:0006468-IEA;GO:0006468-IBA;GO:0005886-IBA \\ transmembrane receptor protein ser		Protein kinase domain
TRINITY_DN7496_c0_g4	FvH4_5g32180.1	18.1088	159.336	141.227	8.79884	0.00272113	0.322415	ase inhibitor I20 \\ 4.70E-127 \\ 87.23 % \\ GO:0003735-IEA;GO:0005840-IEA;GO:0006412-IEA;GO:0005622-IEA \\ structural constituent of ribosome-IEA;ribosome-IEA;translation-IEA;intracellular-IEA \\ GO:0003735;GO:0005840;GO:0006412 \\ structural constituent		Proteinase inhibitor I20	TRINITY_DN2390_c0_g1	FvH4_6g03170.1	26.7245	180.107	153.382	6.73939	3.07528e-05	0.0367209	neurogenic locus notch-like protein \\ 8.20E-90 \\ 72.23 %
TRINITY_DN322406_c0_g1	FvH4_3g25960.1	0.87725	7.664	6.78675	8.73639	0.000335494	0.104611	probable CCR4-associated factor 1 homolog 11 \\ 2.30E-88 \\ 63.88 %	CCR4-NOT transcription complex subunit 7/8	Ribonuclease CAF1	TRINITY_DN1470_c0_g2	FvH4_1g19380.1	15.7475	106.02	90.2722	6.73248	0.000112656	0.0675215	putative UDP-rhamnose:rhamnosyltransferase 1 \\ 0.00E+00 \\ 85.48 % \\ GO:0016757-IEA;GO:0016758-IEA;GO:0016020-IEA;GO:0016021-IEA;GO:0016740-IEA \\ transferase activity, transferring glycosyl groups-IEA;transferase activity, transferring hexosyl groups-I		UDP-glucuronosyl/UDP-glucosyltransferase
TRINITY_DN14114_c0_g1	FvH4_6g19530.1	3.18675	27.805	24.6182	8.72519	0.0021942	0.289109	probable F-box protein At1g60180 \\ 0.00E+00 \\ 84.03 % \\ GO:0016020-IEA;GO:0016021-IEA \\ membrane-IEA;integral component of membrane-IEA \\ GO:0016021 \\ integral component of membrane		F-box domain	TRINITY_DN15100_c0_g1	FvH4_3g02220.1	0.407	2.73125	2.32425	6.71069	0.000280182	0.10871	PREDICTED: uncharacterized protein LOC105350192 \\ 4.30E-102 \\ 83.87 % \\ GO:0016746-IEA;GO:0016747-IEA;GO:0003824-IEA;GO:0016020-IEA;GO:0016740-IEA;GO:0006633-IEA \\ transferase activity, transferring acyl groups-IEA;transferase activity, transferring a
TRINITY_DN324233_c0_g1	FvH4_1g16980.1	0.79125	6.90125	6.11	8.72196	0.0241967	1	probable indole-3-acetic acid-amido synthetase GH3.1 \\ 0.00E+00 \\ 92.13 %		GH3 family	TRINITY_DN10059_c0_g1	FvH4_6g35500.1	1.98425	13.3145	11.3302	6.71009	1.99658e-05	0.0309914	GDSL esterase/lipase 1-like		GDSL lipase/esterase
TRINITY_DN4197_c0_g5	FvH4_3g16410.1	0.14925	1.2985	1.14925	8.70017	1.38027e-05	0.0201682	MDIS1-interacting receptor like kinase 2-like \\ 0.00E+00 \\ 74.82 % \\ GO:0000166-IEA;GO:0016020-IEA;GO:0016021-IEA;GO:0004672-IEA;GO:0016740-IEA;GO:0005524-IEA;GO:0006468-IEA \\ nucleotide binding-IEA;membrane-IEA;integral component of membrane-IEA;prot		Protein kinase domain	TRINITY_DN2718_c0_g1	FvH4_7g15310.1	1.764	11.805	10.041	6.69218	0.00136801	0.242487	1-aminocyclopropane-1-carboxylate synthase 1 \\ 0.00E+00 \\ 89.99 % \\ GO:0042218-IEA;GO:0016847-IEA;GO:0030170-IEA;GO:0009058-IEA;GO:0003824-IEA;GO:0016829-IEA;GO:0009693-IEA;GO:0009835-IEA \\ 1-aminocyclopropane-1-carboxylate biosynthetic process-IEA;1-	1-aminocyclopropane-1-carboxylate synthase 1/2/6 [EC:4.4.1.14]	Aminotransferases, class-I, pyridoxal-phosphate-binding site
TRINITY_DN14579_c0_g1	FvH4_4g28510.1	0.39	3.39225	3.00225	8.69808	1.90553e-07	0.00360102	E3 ubiquitin-protein ligase RHA2B-like \\ 5.80E-164 \\ 80.48 % \\ GO:0016020-IEA;GO:0016021-IEA;GO:0016310-IEA;GO:0016740-IEA;GO:0016301-IEA;GO:0004674-IEA;GO:0006468-IEA \\ membrane-IEA;integral component of membrane-IEA;phosphorylation-IEA;transferase a	E3 ubiquitin-protein ligase RHA2 [EC:2.3.2.27]	Zinc finger, RING-type	TRINITY_DN6944_c0_g2	FvH4_7g10070.1	0.68475	4.572	3.88725	6.67689	6.01348e-05	0.0509932	ethylene-responsive transcription factor 2-like \\ 8.80E-22 \\ 74.99 % \\ GO:0046872-IEA \\ metal ion binding-IEA \\ GO:0046872 \\ metal ion binding		AP2/ERF domain
TRINITY_DN6944_c0_g2	FvH4_7g10070.1	0.52775	4.572	4.04425	8.66319	4.16448e-05	0.0329617	ethylene-responsive transcription factor 2-like \\ 8.80E-22 \\ 74.99 % \\ GO:0046872-IEA \\ metal ion binding-IEA \\ GO:0046872 \\ metal ion binding		AP2/ERF domain	TRINITY_DN4197_c0_g5	FvH4_3g16410.1	0.1945	1.2985	1.104	6.67609	1.43884e-05	0.027194	MDIS1-interacting receptor like kinase 2-like \\ 0.00E+00 \\ 74.82 % \\ GO:0000166-IEA;GO:0016020-IEA;GO:0016021-IEA;GO:0004672-IEA;GO:0016740-IEA;GO:0005524-IEA;GO:0006468-IEA \\ nucleotide binding-IEA;membrane-IEA;integral component of membrane-IEA;prot		Protein kinase domain
TRINITY_DN7446_c0_g1	FvH4_2g40880.1	3.75425	32.466	28.7118	8.6478	0.00607514	0.496174	acidic mammalian chitinase-like \\ 0.00E+00 \\ 81.11 % \\ GO:0008152-IEA;GO:0004568-IEA;GO:0008061-IEA;GO:0004553-IEA;GO:0016787-IEA;GO:0005975-IEA;GO:0016798-IEA \\ metabolic process-IEA;chitinase activity-IEA;chitin binding-IEA;hydrolase activity, hydro	chitinase [EC:3.2.1.14]	Glycoside hydrolase family 18, catalytic domain	TRINITY_DN24392_c0_g1	FvH4_3g07280.1	0.50775	3.38575	2.878	6.66814	0.00349723	0.395518	hypothetical protein Pyn_19849 \\ 1.80E-88 \\ 82.02 % \\ GO:0052689-IEA;GO:0006629-IEA;GO:0016020-IEA;GO:0016021-IEA;GO:0016787-IEA \\ carboxylic ester hydrolase activity-IEA;lipid metabolic process-IEA;membrane-IEA;integral component of membrane-IEA;hydr
TRINITY_DN12312_c0_g1	FvH4_3g44500.1	2.28275	19.5223	17.2395	8.55208	7.5446e-05	0.0461843	hypothetical protein RchiOBHm_Chr5g0081201 \\ 4.10E-18 \\ 54.33 % \\ GO:0016020-IEA;GO:0005509-IEA;GO:0016021-IEA \\ membrane-IEA;calcium ion binding-IEA;integral component of membrane-IEA			TRINITY_DN69_c0_g1	FvH4_5g14410.1	1.3765	9.17425	7.79775	6.66491	2.52944e-06	0.0130281	probable LRR receptor-like serine/threonine-protein kinase At1g74360 \\ 0.00E+00 \\ 86.84 % \\ GO:0000166-IEA;GO:0016020-IEA;GO:0016021-IEA;GO:0016310-IEA;GO:0016740-IEA;GO:0004672-IEA;GO:0016301-IEA;GO:0004674-IEA;GO:0005524-IEA;GO:0006468-IEA \\ nucleot		Protein kinase domain
TRINITY_DN26577_c0_g1	FvH4_4g18630.1	1.744	14.7715	13.0275	8.4699	0.00550524	0.469416	RING-H2 finger protein ATL2 \\ 2.20E-153 \\ 74.63 % \\ GO:0016020-IEA;GO:0016021-IEA \\ membrane-IEA;integral component of membrane-IEA \\ GO:0016021 \\ integral component of membrane		Zinc finger, RING-type	TRINITY_DN7375_c0_g1	FvH4_7g20010.1	1.77	11.6483	9.87825	6.58093	3.11536e-06	0.0139094	hypothetical protein RchiOBHm_Chr1g0363961 \\ 1.50E-114 \\ 96.54 % \\ GO:0009691-IEA;GO:0016787-IEA \\ cytokinin biosynthetic process-IEA;hydrolase activity-IEA \\ GO:0009691;GO:0016787 \\ cytokinin biosynthetic process;hydrolase activity
TRINITY_DN6891_c0_g3	FvH4_1g02250.1	0.73925	6.22375	5.4845	8.41901	1.40251e-08	0.00144023	putative Late embryogenesis abundant protein, LEA-14 \\ 2.70E-87 \\ 68.82 % \\ GO:0045892-IEA \\ negative regulation of transcription, DNA-templated-IEA \\ GO:0045892 \\ negative regulation of transcription, DNA-templated		Late embryogenesis abundant protein, LEA-14	TRINITY_DN3688_c0_g1	FvH4_6g24680.1	7.20525	47.017	39.8117	6.52538	0.016469	0.894187	glucan endo-1,3-beta-glucosidase, basic isoform-like \\ 0.00E+00 \\ 82.93 % \\ GO:0008152-IEA;GO:0042973-IEA;GO:0004553-IEA;GO:0016787-IEA;GO:0005975-IEA;GO:0016798-IEA \\ metabolic process-IEA;glucan endo-1,3-beta-D-glucosidase activity-IEA;hydrolase act		Glycoside hydrolase family 17
TRINITY_DN6167_c0_g1	FvH4_2g41060.1	1.5985	13.4108	11.8123	8.38958	6.60982e-05	0.0433426	probable WRKY transcription factor 40 isoform X1 \\ 0.00E+00 \\ 66.88 % \\ GO:0003677-IEA;GO:0003700-IEA;GO:0006355-IEA;GO:0043565-IEA;GO:0005634-IEA \\ DNA binding-IEA;DNA-binding transcription factor activity-IEA;regulation of transcription, DNA-templat		WRKY domain	TRINITY_DN537_c0_g1	FvH4_2g05100.1	0.5345	3.48475	2.95025	6.51964	0.0016516	0.267372	---NA---
TRINITY_DN778_c0_g1	FvH4_1g05090.1	7.73175	64.818	57.0862	8.38335	0.000284847	0.0958201	aldehyde dehydrogenase family 2 member C4-like \\ 0.00E+00 \\ 94.23 % \\ GO:0050269-IEA;GO:0016491-IEA;GO:0004030-IEA;GO:0055114-IEA;GO:0009699-IEA;GO:0016620-IEA \\ coniferyl-aldehyde dehydrogenase activity-IEA;oxidoreductase activity-IEA;aldehyde dehydr	coniferyl-aldehyde dehydrogenase [EC:1.2.1.68]	Aldehyde dehydrogenase domain	TRINITY_DN5652_c0_g1	FvH4_3g01000.1	20.4345	133.061	112.627	6.51161	0.00295333	0.361132	acyl-CoA--sterol O-acyltransferase 1-like \\ 8.60E-04 \\ 100.00 %		Wax synthase domain
TRINITY_DN2678_c0_g1	FvH4_2g17100.1	103.002	862.973	759.971	8.37822	0.000178689	0.0737917	3-hydroxy-3-methylglutaryl-coenzyme A reductase 1-like \\ 0.00E+00 \\ 92.01 % \\ GO:0005789-IEA;GO:0050662-IEA;GO:0016616-IEA;GO:0016491-IEA;GO:0008299-IEA;GO:0050661-IEA;GO:0016020-IEA;GO:0016021-IEA;GO:0055114-IEA;GO:0015936-IEA;GO:0004420-IEA;GO:000578	hydroxymethylglutaryl-CoA reductase (NADPH) [EC:1.1.1.34]	Hydroxymethylglutaryl-CoA reductase, class I/II	TRINITY_DN18331_c0_g1	FvH4_6g00880.1	0.26025	1.68175	1.4215	6.46206	0.00514728	0.47965	cytochrome P450 714C2-like \\ 0.00E+00 \\ 86.60 % \\ GO:0005506-IEA;GO:0046872-IEA;GO:0016491-IEA;GO:0016705-IEA;GO:0016020-IEA;GO:0016021-IEA;GO:0020037-IEA;GO:0055114-IEA;GO:0004497-IEA;GO:0050616-IEA \\ iron ion binding-IEA;metal ion binding-IEA;oxidor	cytochrome P450 family 714 subfamily A polypeptide 1	Cytochrome P450
TRINITY_DN2834_c0_g1	FvH4_6g28650.1	7.4875	62.7185	55.231	8.37643	0.000359871	0.108585	probable WRKY transcription factor 40 \\ 2.90E-72 \\ 87.96 % \\ GO:0003677-IEA;GO:0003700-IEA;GO:0006355-IEA;GO:0043565-IEA;GO:0005634-IEA \\ DNA binding-IEA;DNA-binding transcription factor activity-IEA;regulation of transcription, DNA-templated-IEA;sequ		WRKY domain	TRINITY_DN12324_c0_g1	FvH4_3g37400.1	0.62425	4.03075	3.4065	6.45695	0.00110497	0.215871	probable serine/threonine-protein kinase At5g41260 isoform X2 \\ 0.00E+00 \\ 84.51 % \\ GO:0016310-IEA;GO:0016740-IEA;GO:0004672-IEA;GO:0016301-IEA;GO:0005524-IEA;GO:0006468-IEA \\ phosphorylation-IEA;transferase activity-IEA;protein kinase activity-IEA;k	BR-signaling kinase [EC:2.7.11.1]	Protein kinase domain
TRINITY_DN3267_c0_g1	FvH4_6g26300.1	0.549	4.5055	3.9565	8.20674	0.00172907	0.256835	probable L-type lectin-domain containing receptor kinase VII.2 \\ 0.00E+00 \\ 81.87 % \\ GO:0000166-IEA;GO:0016020-IEA;GO:0016021-IEA;GO:0016310-IEA;GO:0004672-IEA;GO:0016740-IEA;GO:0016301-IEA;GO:0030246-IEA;GO:0004674-IEA;GO:0005524-IEA;GO:0006468-IEA \		Protein kinase domain	TRINITY_DN15_c0_g2	FvH4_6g06090.1	7.236	46.5333	39.2973	6.4308	1.63401e-06	0.0123621	probable linoleate 9S-lipoxygenase 5 \\ 0.00E+00 \\ 92.10 % \\ GO:0016702-IEA;GO:0031408-IEA;GO:0051213-IEA;GO:0016491-IEA;GO:0046872-IEA;GO:0055114-IEA;GO:0006633-IEA \\ oxidoreductase activity, acting on single donors with incorporation of molecular oxy	linoleate 9S-lipoxygenase [EC:1.13.11.58]	Lipoxygenase
TRINITY_DN6280_c0_g1	FvH4_2g26080.1	13.9527	114.259	100.306	8.189	1.07932e-05	0.0200337	ethylene-responsive transcription factor ERF071	EREBP-like factor	AP2/ERF domain	TRINITY_DN12946_c0_g1	FvH4_6g53770.1	3.10075	19.927	16.8262	6.42651	5.1788e-05	0.0473422	probable WRKY transcription factor 75 \\ 2.00E-51 \\ 93.84 % \\ GO:0003677-IEA;GO:0003700-IEA;GO:0006355-IEA;GO:0043565-IEA;GO:0005634-IEA \\ DNA binding-IEA;DNA-binding transcription factor activity-IEA;regulation of transcription, DNA-templated-IEA;sequ		WRKY domain
TRINITY_DN321_c2_g2	FvH4_3g17850.1	3.36675	27.27	23.9032	8.0998	0.00066081	0.150685	probable leucine-rich repeat receptor-like serine/threonine-protein kinase At3g14840 \\ 0.00E+00 \\ 82.54 % \\ GO:0016020-IEA;GO:0016021-IEA;GO:0046777-IBA;GO:0016310-IEA;GO:0004672-IEA;GO:0016301-IEA;GO:0004674-IBA;GO:0005524-IEA;GO:0006468-IEA;GO:000588		Protein kinase domain	TRINITY_DN14210_c0_g1	FvH4_7g15780.1	58.1955	373.544	315.348	6.41877	0.000841311	0.186238	probable inactive 2-oxoglutarate-dependent dioxygenase AOP2 \\ 7.70E-165 \\ 91.82 % \\ GO:0051213-IEA;GO:0016491-IEA;GO:0046872-IEA;GO:0055114-IEA \\ dioxygenase activity-IEA;oxidoreductase activity-IEA;metal ion binding-IEA;oxidation-reduction process-IE		Oxoglutarate/iron-dependent dioxygenase
TRINITY_DN5321_c0_g2	FvH4_6g05210.1	0.5655	4.57825	4.01275	8.09593	6.22985e-08	0.00286056	protein DMP10-like		Protein DMP	TRINITY_DN14867_c0_g1	FvH4_5g03430.1	56.389	361.089	304.7	6.40354	6.3597e-05	0.0516948	putative Late embryogenesis abundant protein, LEA-14 \\ 3.60E-97 \\ 94.98 % \\ GO:0008270-IEA;GO:0016829-IEA;GO:0004089-IEA;GO:0015976-IEA \\ zinc ion binding-IEA;lyase activity-IEA;carbonate dehydratase activity-IEA;carbon utilization-IEA \\ GO:0004089;G		Late embryogenesis abundant protein, LEA-14
TRINITY_DN30249_c0_g1	FvH4_6g02200.1	1.43075	11.4545	10.0237	8.00594	0.000285836	0.0960278	---NA--- \\ 3.00E-47 \\ 52.53 % \\ GO:0016020-IEA;GO:0016021-IEA \\ membrane-IEA;integral component of membrane-IEA			TRINITY_DN3534_c0_g1	FvH4_2g23800.1	7.596	48.4143	40.8183	6.37365	0.000102746	0.0639452	phenazine biosynthesis-like domain-containing protein 1 \\ 0.00E+00 \\ 86.58 % \\ GO:0009058-IEA;GO:0003824-IEA;GO:0102943-IEA;GO:0016853-IEA \\ biosynthetic process-IEA;catalytic activity-IEA;trans-2,3-dihydro-3-hydroxy-anthranilate isomerase activity-IE		Phenazine biosynthesis PhzF protein
TRINITY_DN18403_c0_g1	FvH4_2g05370.1	22.937	183.556	160.619	8.00262	8.21666e-05	0.0480324	peroxidase 44 \\ 1.10E-05 \\ 100.00 %	peroxidase [EC:1.11.1.7]	Plant peroxidase	TRINITY_DN6005_c0_g2	FvH4_1g10380.1	0.17625	1.116	0.93975	6.33191	2.18088e-05	0.0318418	ankyrin repeat-containing protein At5g02620-like \\ 0.00E+00 \\ 66.05 % \\ GO:2000031-IEA;GO:0016020-IEA;GO:0016021-IEA;GO:0071446-IEA;GO:0031347-IEA \\ regulation of salicylic acid mediated signaling pathway-IEA;membrane-IEA;integral component of membran		Ankyrin repeat
TRINITY_DN8972_c0_g1	FvH4_2g38170.1	0.93425	7.4575	6.52325	7.98234	4.17845e-05	0.0329617	pto-interacting protein 1-like isoform X1 \\ 0.00E+00 \\ 74.83 % \\ GO:0007178-IEA;GO:0016310-IEA;GO:0004672-IEA;GO:0016740-IEA;GO:0016301-IEA;GO:0004675-IBA;GO:0005524-IEA;GO:0006468-IEA;GO:0006468-IBA;GO:0005886-IBA \\ transmembrane receptor protein ser		Protein kinase domain	TRINITY_DN8773_c0_g1	FvH4_2g05090.1	8.58175	54.1285	45.5468	6.3074	0.0225435	1	UDP-glucose glucosyltransferase \\ 0.00E+00 \\ 89.77 % \\ GO:0016757-IEA;GO:0050412-IEA;GO:0016758-IEA;GO:0016740-IEA;GO:0047913-IEA;GO:0009636-IEA \\ transferase activity, transferring glycosyl groups-IEA;cinnamate beta-D-glucosyltransferase activity-IEA		UDP-glucuronosyl/UDP-glucosyltransferase
TRINITY_DN6962_c0_g1	FvH4_3g04020.1	1.95625	15.5497	13.5935	7.94875	0.000168551	0.0713257	F-box protein At1g61340-like \\ 5.50E-31 \\ 69.17 % \\ GO:0016020-IEA;GO:0016021-IEA \\ membrane-IEA;integral component of membrane-IEA \\ GO:0016020 \\ membrane		F-box domain	TRINITY_DN2594_c0_g2	FvH4_3g12720.1	4.84275	30.524	25.6813	6.30303	6.6758e-05	0.0527035	VQ motif-containing protein 22 \\ 0.00E+00 \\ 95.32 % \\ GO:0005737-IEA;GO:0016192-IEA;GO:0003824-IEA;GO:0016020-IEA;GO:0015031-IEA;GO:0031410-IEA;GO:0005198-IEA;GO:0030663-IEA;GO:0000139-IEA;GO:0005794-IEA;GO:0030117-IEA;GO:0006886-IEA \\ cytoplasm-IEA;v		VQ
TRINITY_DN12952_c0_g1	FvH4_1g05390.1	0.2205	1.73825	1.51775	7.88322	0.00378339	0.383783	glucan endo-1,3-beta-glucosidase 8 \\ 1.40E-18 \\ 82.72 %		Glycoside hydrolase family 17	TRINITY_DN1559_c0_g1	FvH4_4g09990.1	4.99275	31.4372	26.4445	6.29658	0.000226083	0.0967352	protein DETOXIFICATION 16-like isoform X1 \\ 0.00E+00 \\ 90.57 % \\ GO:0055085-IEA;GO:0015297-IEA;GO:0016020-IEA;GO:0016021-IEA;GO:0006855-IEA;GO:0015238-IEA \\ transmembrane transport-IEA;antiporter activity-IEA;membrane-IEA;integral component of membran		Multi antimicrobial extrusion protein
TRINITY_DN3013_c0_g1	FvH4_5g20430.1	67.2368	523.951	456.714	7.79263	8.15472e-05	0.0478582	protein DMR6-LIKE OXYGENASE 2-like \\ 0.00E+00 \\ 94.96 % \\ GO:0051213-IEA;GO:0045486-IEA;GO:0016491-IEA;GO:0046872-IEA;GO:0055114-IEA \\ dioxygenase activity-IEA;naringenin 3-dioxygenase activity-IEA;oxidoreductase activity-IEA;metal ion binding-IEA;oxi		Oxoglutarate/iron-dependent dioxygenase	TRINITY_DN10402_c0_g1	FvH4_4g12720.1	5.66125	35.5293	29.868	6.27587	0.00056391	0.152509	probable glutathione S-transferase \\ 0.00E+00 \\ 54.85 % \\ GO:0016020-IEA;GO:0016021-IEA \\ membrane-IEA;integral component of membrane-IEA	glutathione S-transferase [EC:2.5.1.18]	Glutathione S-transferase, N-terminal
TRINITY_DN262292_c0_g1	FvH4_2g04290.1	6.39725	49.7572	43.36	7.77791	0.000105613	0.0551275	probable beta-D-xylosidase 5 isoform X2 \\ 2.60E-05 \\ 98.34 %			TRINITY_DN10563_c1_g2	FvH4_5g16890.1	5.6905	35.6992	30.0087	6.27348	2.71045e-07	0.00542396	protein DETOXIFICATION 16-like \\ 0.00E+00 \\ 85.87 % \\ GO:0055085-IEA;GO:0009507-IEA;GO:0016020-IEA;GO:0015297-IEA;GO:0016021-IEA;GO:0006855-IEA;GO:0015238-IEA;GO:0009536-IEA \\ transmembrane transport-IEA;chloroplast-IEA;membrane-IEA;antiporter activit		Multi antimicrobial extrusion protein
TRINITY_DN12426_c0_g2	FvH4_5g08800.1	0.68125	5.295	4.61375	7.77248	0.0125976	0.747051	putative small auxin-up RNA \\ 2.60E-92 \\ 76.83 % \\ GO:0055114-IEA;GO:0004497-IEA;GO:0005576-IEA;GO:0016787-IEA;GO:0005975-IEA;GO:0030248-IEA \\ oxidation-reduction process-IEA;monooxygenase activity-IEA;extracellular region-IEA;hydrolase activity-IEA;c		Small auxin-up RNA	TRINITY_DN9365_c0_g1	FvH4_5g02710.1	3.87475	24.2397	20.365	6.25582	0.000628384	0.159725	BTB/POZ domain-containing protein At5g41330 \\ 0.00E+00 \\ 99.03 % \\ GO:0003743-IEA;GO:0000166-IEA;GO:0003723-IEA;GO:0005737-IEA;GO:0004386-IEA;GO:0004004-IEA;GO:0005524-IEA;GO:0016787-IEA;GO:0006412-IEA;GO:0003676-IEA;GO:0006413-IEA \\ translation initi		BTB/POZ domain
TRINITY_DN201987_c0_g1	FvH4_7g09310.1	1.91625	14.685	12.7688	7.66341	1.85841e-06	0.00927909	PGG domain containing protein \\ 1.90E-91 \\ 67.74 % \\ GO:0016020-IEA;GO:0016021-IEA \\ membrane-IEA;integral component of membrane-IEA		PGG domain	TRINITY_DN2689_c1_g1	FvH4_6g10800.1	0.1745	1.08925	0.91475	6.24212	0.00141765	0.246883	receptor-like protein 12 \\ 0.00E+00 \\ 79.09 % \\ GO:0016020-IEA;GO:0016021-IEA \\ membrane-IEA;integral component of membrane-IEA \\ GO:0016021 \\ integral component of membrane		Leucine-rich repeat
TRINITY_DN5566_c1_g1	FvH4_7g30730.1	0.60125	4.59325	3.992	7.6395	0.0038526	0.388501	protein DETOXIFICATION 27-like \\ 0.00E+00 \\ 91.47 % \\ GO:0055085-IEA;GO:0016020-IEA;GO:0015297-IEA;GO:0016021-IEA;GO:0006855-IEA;GO:0015238-IEA \\ transmembrane transport-IEA;membrane-IEA;antiporter activity-IEA;integral component of membrane-IEA;drug		Multi antimicrobial extrusion protein	TRINITY_DN379_c0_g3	FvH4_3g35040.1	2.6825	16.7302	14.0477	6.23681	0.000907504	0.194056	zinc finger protein ZAT12-like \\ 5.30E-06 \\ 94.94 % \\ GO:0003723-IEA;GO:0003676-IEA \\ RNA binding-IEA;nucleic acid binding-IEA		Zinc finger C2H2-type
TRINITY_DN17981_c0_g1	FvH4_2g19300.1	1.78725	13.6527	11.8655	7.63897	2.04312e-05	0.0225278	pantoate--beta-alanine ligase \\ 0.00E+00 \\ 88.27 % \\ GO:0015940-IEA;GO:0003824-IEA;GO:0009058-IEA;GO:0004592-IEA;GO:0016874-IEA \\ pantothenate biosynthetic process-IEA;catalytic activity-IEA;biosynthetic process-IEA;pantoate-beta-alanine ligase activi	pantoate--beta-alanine ligase [EC:6.3.2.1]	Pantoate-beta-alanine ligase	TRINITY_DN3172_c0_g1	FvH4_3g00840.1	3.19725	19.8513	16.654	6.20885	0.000484586	0.142995	probable xyloglucan endotransglucosylase/hydrolase protein 23 \\ 8.20E-07 \\ 80.55 %	xyloglucan:xyloglucosyl transferase TCH4 [EC:2.4.1.207]	Glycoside hydrolase family 16
TRINITY_DN10402_c0_g1	FvH4_4g12720.1	4.654	35.5293	30.8753	7.63413	0.000453368	0.124371	probable glutathione S-transferase \\ 0.00E+00 \\ 54.85 % \\ GO:0016020-IEA;GO:0016021-IEA \\ membrane-IEA;integral component of membrane-IEA	glutathione S-transferase [EC:2.5.1.18]	Glutathione S-transferase, N-terminal	TRINITY_DN3476_c0_g2	FvH4_5g36920.1	1.5635	9.7055	8.142	6.20755	0.000204363	0.0912435	protein EXORDIUM-like \\ 0.00E+00 \\ 92.51 % \\ GO:0016020-IEA;GO:0016021-IEA;GO:0055114-IEA \\ membrane-IEA;integral component of membrane-IEA;oxidation-reduction process-IEA \\ GO:0016021;GO:0055114 \\ integral component of membrane;oxidation-reduction		Protein EXORDIUM-like
TRINITY_DN13661_c0_g1	FvH4_2g04750.1	3.79975	28.9073	25.1075	7.60767	0.00765104	0.564116	probable indole-3-acetic acid-amido synthetase GH3.1 \\ 0.00E+00 \\ 93.72 %		GH3 family	TRINITY_DN259937_c0_g1	FvH4_7g20000.1	16.6775	103.489	86.8113	6.20529	0.00186752	0.283133	hypothetical protein RchiOBHm_Chr1g0363951 \\ 0.00E+00 \\ 91.87 % \\ GO:0000166-IEA;GO:0016310-IEA;GO:0004672-IEA;GO:0016301-IEA;GO:0004674-IEA;GO:0005524-IEA;GO:0006468-IEA \\ nucleotide binding-IEA;phosphorylation-IEA;protein kinase activity-IEA;kinase
TRINITY_DN2958_c0_g1	FvH4_2g35260.1	3.07275	23.3535	20.2807	7.6002	1.0985e-05	0.020056	receptor-like protein kinase HSL1 \\ 0.00E+00 \\ 83.89 % \\ GO:0000166-IEA;GO:0000165-IEA;GO:0000186-IEA;GO:0016491-IEA;GO:0016020-IEA;GO:0016021-IEA;GO:0004709-IEA;GO:0055114-IEA;GO:0016310-IEA;GO:0016740-IEA;GO:0016301-IEA;GO:0032440-IEA;GO:0004672-IEA;		Protein kinase domain	TRINITY_DN17981_c0_g1	FvH4_2g19300.1	2.20025	13.6527	11.4525	6.20509	2.45584e-05	0.0336024	pantoate--beta-alanine ligase \\ 0.00E+00 \\ 88.27 % \\ GO:0015940-IEA;GO:0003824-IEA;GO:0009058-IEA;GO:0004592-IEA;GO:0016874-IEA \\ pantothenate biosynthetic process-IEA;catalytic activity-IEA;biosynthetic process-IEA;pantoate-beta-alanine ligase activi	pantoate--beta-alanine ligase [EC:6.3.2.1]	Pantoate-beta-alanine ligase
TRINITY_DN12592_c0_g1	FvH4_5g03320.1	55.187	419.372	364.185	7.5991	0.000302625	0.0994981	late embryogenesis abundant protein At1g64065-like \\ 9.80E-57 \\ 59.91 %		Late embryogenesis abundant protein, LEA-14	TRINITY_DN470_c0_g1	FvH4_3g36960.1	25.1045	155.676	130.571	6.20112	0.0006249	0.159365	putative oxidoreductase \\ 0.00E+00 \\ 75.67 % \\ GO:0003677-IEA \\ DNA binding-IEA \\ GO:0003677 \\ DNA binding	tropinone reductase I [EC:1.1.1.206]	Short-chain dehydrogenase/reductase SDR
TRINITY_DN12470_c0_g1	FvH4_5g01840.1	11.8555	89.87	78.0145	7.58045	0.0141789	0.797391	osmotin-like protein osm34		Thaumatin	TRINITY_DN12952_c0_g1	FvH4_1g05390.1	0.28075	1.73825	1.4575	6.19145	0.00484173	0.466414	glucan endo-1,3-beta-glucosidase 8 \\ 1.40E-18 \\ 82.72 %		Glycoside hydrolase family 17
TRINITY_DN11218_c0_g1	FvH4_3g44360.1	5.11275	38.7157	33.603	7.57239	0.000191794	0.076397	peroxidase 15-like \\ 1.30E-141 \\ 87.42 % \\ GO:0045892-IEA \\ negative regulation of transcription, DNA-templated-IEA \\ GO:0045892 \\ negative regulation of transcription, DNA-templated	peroxidase [EC:1.11.1.7]	Plant peroxidase	TRINITY_DN3759_c0_g1	FvH4_6g50750.1	1.513	9.25975	7.74675	6.12013	0.000136551	0.0740623	L-aspartate oxidase, chloroplastic \\ 0.00E+00 \\ 92.21 % \\ GO:0005737-IEA;GO:0009507-IEA;GO:0016491-IEA;GO:0019363-IEA;GO:0009435-IEA;GO:0055114-IEA;GO:0008734-IEA;GO:0044318-IEA \\ cytoplasm-IEA;chloroplast-IEA;oxidoreductase activity-IEA;pyridine nucl	L-aspartate oxidase [EC:1.4.3.16]	FAD-dependent oxidoreductase 2, FAD binding domain
TRINITY_DN12324_c0_g1	FvH4_3g37400.1	0.5325	4.03075	3.49825	7.56948	0.000983423	0.185935	probable serine/threonine-protein kinase At5g41260 isoform X2 \\ 0.00E+00 \\ 84.51 % \\ GO:0016310-IEA;GO:0016740-IEA;GO:0004672-IEA;GO:0016301-IEA;GO:0005524-IEA;GO:0006468-IEA \\ phosphorylation-IEA;transferase activity-IEA;protein kinase activity-IEA;k	BR-signaling kinase [EC:2.7.11.1]	Protein kinase domain	TRINITY_DN5023_c0_g1	FvH4_5g01350.1	76.576	467.121	390.545	6.1001	9.65145e-05	0.0617913	hydroxymethylglutaryl-CoA synthase \\ 1.30E-135 \\ 99.26 % \\ GO:0016746-IEA;GO:0008299-IEA;GO:0003824-IEA;GO:0006629-IEA;GO:0008202-IEA;GO:0006694-IEA;GO:0016740-IEA;GO:0004421-IEA;GO:0016126-IEA \\ transferase activity, transferring acyl groups-IEA;isop	hydroxymethylglutaryl-CoA synthase [EC:2.3.3.10]	Hydroxymethylglutaryl-coenzyme A synthase, active site
TRINITY_DN9672_c0_g1	FvH4_7g26930.1	19.5245	147.193	127.668	7.53887	1.62304e-05	0.0202091	ethylene-responsive transcription factor ERF105-like \\ 0.00E+00 \\ 52.31 %	EREBP-like factor	AP2/ERF domain	TRINITY_DN2792_c0_g1	FvH4_1g05530.1	1.236	7.53325	6.29725	6.09486	0.00272277	0.348278	bark storage protein A		Nucleoside phosphorylase domain
TRINITY_DN990_c0_g2	FvH4_2g35060.1	0.37025	2.77075	2.4005	7.48346	0.000705105	0.1565	putative wall-associated receptor kinase-like 16 \\ 0.00E+00 \\ 80.80 % \\ GO:0000166-IEA;GO:0016020-IEA;GO:0005509-IEA;GO:0016021-IEA;GO:0016310-IEA;GO:0004672-IEA;GO:0016740-IEA;GO:0030247-IEA;GO:0016301-IEA;GO:0004674-IEA;GO:0005524-IEA;GO:0006468-IEA		EGF-type aspartate/asparagine hydroxylation site	TRINITY_DN2291_c0_g1	FvH4_2g02310.1	0.30975	1.88375	1.574	6.08152	0.0439498	1	indole-3-acetic acid-induced protein ARG7-like \\ 2.80E-43 \\ 90.68 % \\ GO:0016757-IEA;GO:0016758-IEA;GO:0016740-IEA \\ transferase activity, transferring glycosyl groups-IEA;transferase activity, transferring hexosyl groups-IEA;transferase activity-IEA		Small auxin-up RNA
TRINITY_DN2950_c0_g3	FvH4_5g31830.1	0.56375	4.21825	3.6545	7.48248	0.000118415	0.0577216	protein NRT1/ PTR FAMILY 5.10-like \\ 0.00E+00 \\ 82.21 % \\ GO:0055085-IEA;GO:0006857-IEA;GO:0016020-IEA;GO:0016021-IEA;GO:0022857-IEA;GO:0005215-IEA \\ transmembrane transport-IEA;oligopeptide transport-IEA;membrane-IEA;integral component of membrane-IE		Proton-dependent oligopeptide transporter family	TRINITY_DN18792_c0_g1	FvH4_3g06620.1	0.7195	4.35325	3.63375	6.05038	0.00382938	0.414163	GDSL esterase/lipase \\ 9.30E-163 \\ 69.89 % \\ GO:0003677-IEA;GO:0044212-IBA;GO:0030154-IBA;GO:0043565-IBA;GO:0005634-IBA \\ DNA binding-IEA;transcription regulatory region DNA binding-IBA;cell differentiation-IBA;sequence-specific DNA binding-IBA;nucleu		GDSL lipase/esterase
TRINITY_DN20056_c0_g1	FvH4_6g36530.1	0.17425	1.30225	1.128	7.47346	0.00470242	0.433735	polygalacturonase QRT3-like		Parallel beta-helix repeat	TRINITY_DN125_c0_g1	FvH4_2g27430.1	6.98425	42.0907	35.1065	6.02652	0.000239598	0.100147	NAC domain-containing protein 2 \\ 1.70E-95 \\ 97.44 % \\ GO:0003677-IEA;GO:0006355-IEA;GO:0005634-IEA \\ DNA binding-IEA;regulation of transcription, DNA-templated-IEA;nucleus-IEA \\ GO:0003677;GO:0005634;GO:0006355 \\ DNA binding;nucleus;regulation of t		NAC domain
TRINITY_DN15_c0_g1	FvH4_6g06100.1	8.16225	60.633	52.4707	7.42847	9.46535e-05	0.0523943	probable linoleate 9S-lipoxygenase 5 \\ 0.00E+00 \\ 86.14 % \\ GO:0031408-IEA;GO:0016702-IEA;GO:0051213-IEA;GO:0016491-IEA;GO:0046872-IEA;GO:0055114-IEA;GO:0006633-IEA \\ oxylipin biosynthetic process-IEA;oxidoreductase activity, acting on single donors w	linoleate 9S-lipoxygenase [EC:1.13.11.58]	Lipoxygenase	TRINITY_DN3381_c0_g1	FvH4_6g35140.1	27.6037	166.29	138.686	6.02418	0.00227375	0.317714	protein TIFY 10b-like		Tify domain
TRINITY_DN15802_c0_g1	FvH4_2g34060.1	2.655	19.6552	17.0002	7.40311	3.84889e-05	0.031704	uncharacterized acetyltransferase At3g50280-like \\ 0.00E+00 \\ 85.97 % \\ GO:0016746-IEA;GO:0016747-IEA;GO:0016740-IEA;GO:0047172-IEA \\ transferase activity, transferring acyl groups-IEA;transferase activity, transferring acyl groups other than amino-ac		Transferase	TRINITY_DN3013_c0_g1	FvH4_5g20430.1	87.2177	523.951	436.733	6.00739	0.000148417	0.0767602	protein DMR6-LIKE OXYGENASE 2-like \\ 0.00E+00 \\ 94.96 % \\ GO:0051213-IEA;GO:0045486-IEA;GO:0016491-IEA;GO:0046872-IEA;GO:0055114-IEA \\ dioxygenase activity-IEA;naringenin 3-dioxygenase activity-IEA;oxidoreductase activity-IEA;metal ion binding-IEA;oxi		Oxoglutarate/iron-dependent dioxygenase
TRINITY_DN6602_c0_g1	FvH4_7g34200.1	2.64625	19.5802	16.934	7.39924	0.0026066	0.316772	alcohol dehydrogenase-like 1 \\ 0.00E+00 \\ 73.87 % \\ GO:0005634-IEA \\ nucleus-IEA	S-(hydroxymethyl)glutathione dehydrogenase / alcohol dehydrogenase [EC:1.1.1.284 1.1.1.1]	Alcohol dehydrogenase, zinc-type, conserved site	TRINITY_DN2810_c3_g1	FvH4_2g29490.1	0.252	1.49725	1.24525	5.94147	0.000356237	0.121731	UPF0481 protein At3g47200-like \\ 5.30E-166 \\ 73.32 % \\ GO:0005524-IEA \\ ATP binding-IEA		Protein of unknown function DUF247, plant
TRINITY_DN11859_c0_g1	FvH4_6g16460.1	0.78125	5.76875	4.9875	7.384	0.000717967	0.157763	4-coumarate--CoA ligase-like 7 \\ 0.00E+00 \\ 78.48 % \\ GO:0047077-IEA;GO:0003987-IEA;GO:0003824-IEA;GO:0016491-IEA;GO:0016020-IEA;GO:0016021-IEA;GO:0055114-IEA;GO:0016874-IEA \\ Photinus-luciferin 4-monooxygenase (ATP-hydrolyzing) activity-IEA;acetate-C	4-coumarate--CoA ligase [EC:6.2.1.12]	AMP-dependent synthetase/ligase	TRINITY_DN6858_c0_g1	FvH4_5g02080.1	9.28325	54.9813	45.698	5.92263	0.0073944	0.585043	oxalate--CoA ligase-like \\ 0.00E+00 \\ 90.13 % \\ GO:0050203-IEA;GO:0003987-IEA;GO:0003824-IEA;GO:0016874-IEA \\ oxalate-CoA ligase activity-IEA;acetate-CoA ligase activity-IEA;catalytic activity-IEA;ligase activity-IEA \\ GO:0003987;GO:0050203 \\ acetat	oxalate---CoA ligase [EC:6.2.1.8]	AMP-dependent synthetase/ligase
TRINITY_DN69_c0_g1	FvH4_5g14410.1	1.2515	9.17425	7.92275	7.3306	1.40582e-06	0.00776886	probable LRR receptor-like serine/threonine-protein kinase At1g74360 \\ 0.00E+00 \\ 86.84 % \\ GO:0000166-IEA;GO:0016020-IEA;GO:0016021-IEA;GO:0016310-IEA;GO:0016740-IEA;GO:0004672-IEA;GO:0016301-IEA;GO:0004674-IEA;GO:0005524-IEA;GO:0006468-IEA \\ nucleot		Protein kinase domain	TRINITY_DN18381_c0_g1	FvH4_7g25370.1	0.304	1.79975	1.49575	5.92023	0.00872935	0.635018	neuronal PAS domain protein \\ 0.00E+00 \\ 87.43 %		Single hybrid motif
TRINITY_DN470_c0_g1	FvH4_3g36960.1	21.2505	155.676	134.425	7.32576	0.000431396	0.120599	putative oxidoreductase \\ 0.00E+00 \\ 75.67 % \\ GO:0003677-IEA \\ DNA binding-IEA \\ GO:0003677 \\ DNA binding	tropinone reductase I [EC:1.1.1.206]	Short-chain dehydrogenase/reductase SDR	TRINITY_DN9672_c0_g1	FvH4_7g26930.1	25.0135	147.193	122.179	5.88453	1.80739e-05	0.0299651	ethylene-responsive transcription factor ERF105-like \\ 0.00E+00 \\ 52.31 %	EREBP-like factor	AP2/ERF domain
TRINITY_DN7598_c0_g1	FvH4_3g09930.1	0.71275	5.1845	4.47175	7.27394	0.001708	0.254634	cationic amino acid transporter 1-like \\ 0.00E+00 \\ 88.01 % \\ GO:0055085-IEA;GO:0016020-IEA;GO:0016021-IEA;GO:0022857-IEA \\ transmembrane transport-IEA;membrane-IEA;integral component of membrane-IEA;transmembrane transporter activity-IEA \\ GO:001602		Amino acid/polyamine transporter I	TRINITY_DN3691_c0_g1	FvH4_6g46480.1	11.0655	65.1015	54.036	5.88329	0.0110241	0.72229	NADH-ubiquinone reductase complex 1 MLRQ subunit \\ 5.00E-157 \\ 99.56 % \\ GO:0000166-IEA;GO:0000165-IEA;GO:0005737-IEA;GO:0050850-IEA;GO:0004707-IEA;GO:0016310-IEA;GO:0016740-IEA;GO:0016301-IEA;GO:1903340-IEA;GO:1905665-IEA;GO:0004672-IEA;GO:0004674-IEA
TRINITY_DN6926_c0_g1	FvH4_2g21550.1	1.216	8.843	7.627	7.2722	0.00326104	0.355142	ethylene-responsive transcription factor 1B-like \\ 1.70E-170 \\ 62.36 % \\ GO:0003677-IEA;GO:0007165-IEA;GO:0043531-IEA \\ DNA binding-IEA;signal transduction-IEA;ADP binding-IEA	ethylene-responsive transcription factor 1	AP2/ERF domain	TRINITY_DN1694_c0_g1	FvH4_6g44110.1	0.34375	2.0185	1.67475	5.872	5.50692e-05	0.0485235	kinase RLK-Pelle-DLSV family \\ 8.60E-10 \\ 69.09 % \\ GO:0000166-IEA;GO:0048544-IEA;GO:0016020-IEA;GO:0016021-IEA;GO:0016310-IEA;GO:0004672-IEA;GO:0016740-IEA;GO:0016301-IEA;GO:0004674-IEA;GO:0030246-IEA;GO:0005524-IEA;GO:0006468-IEA \\ nucleotide bindin		Protein kinase domain
TRINITY_DN22867_c0_g1	FvH4_2g29390.1	2.41825	17.515	15.0968	7.24284	0.0244877	1	hypothetical protein RchiOBHm_Chr6g0298191 \\ 1.00E-100 \\ 75.15 % \\ GO:0016740-IEA;GO:0004364-IEA \\ transferase activity-IEA;glutathione transferase activity-IEA \\ GO:0016740 \\ transferase activity			TRINITY_DN23992_c0_g2	FvH4_5g35580.1	2.026	11.7545	9.7285	5.80183	0.000752849	0.175174	probable pectinesterase/pectinesterase inhibitor 20 \\ 0.00E+00 \\ 86.75 % \\ GO:0004857-IEA;GO:0005618-IEA;GO:0043086-IEA;GO:0045330-IEA;GO:0030599-IEA;GO:0042545-IEA;GO:0045490-IEA;GO:0016787-IEA \\ enzyme inhibitor activity-IEA;cell wall-IEA;negative r	pectinesterase [EC:3.1.1.11]	Pectinesterase, catalytic
TRINITY_DN3581_c0_g1	FvH4_1g02900.1	3.02075	21.8642	18.8435	7.23802	0.00332912	0.358477	blue copper protein-like \\ 4.10E-122 \\ 75.26 % \\ GO:0003677-IEA;GO:0003700-IEA;GO:0006355-IEA;GO:0043565-IEA;GO:0005634-IEA \\ DNA binding-IEA;DNA-binding transcription factor activity-IEA;regulation of transcription, DNA-templated-IEA;sequence-specifi		Phytocyanin domain	TRINITY_DN26173_c0_g1	FvH4_5g00290.1	0.4945	2.84225	2.34775	5.74772	0.00734539	0.584204	acid beta-fructofuranosidase-like \\ 0.00E+00 \\ 85.23 % \\ GO:0008152-IEA;GO:0016020-IEA;GO:0016021-IEA;GO:0005773-IEA;GO:0004553-IEA;GO:0004564-IEA;GO:0004575-IEA;GO:0005774-IEA;GO:0016798-IEA;GO:0005975-IEA;GO:0016787-IEA \\ metabolic process-IEA;membr	beta-fructofuranosidase [EC:3.2.1.26]	Glycoside hydrolase, family 32
TRINITY_DN1559_c0_g1	FvH4_4g09990.1	4.344	31.4372	27.0932	7.23694	0.000207922	0.0805716	protein DETOXIFICATION 16-like isoform X1 \\ 0.00E+00 \\ 90.57 % \\ GO:0055085-IEA;GO:0015297-IEA;GO:0016020-IEA;GO:0016021-IEA;GO:0006855-IEA;GO:0015238-IEA \\ transmembrane transport-IEA;antiporter activity-IEA;membrane-IEA;integral component of membran		Multi antimicrobial extrusion protein	TRINITY_DN30351_c0_g1	FvH4_7g34120.1	4.36825	24.9895	20.6212	5.72071	5.55515e-05	0.0487571	s-norcoclaurine synthase 2 \\ 1.60E-86 \\ 86.59 % \\ GO:0000166-IEA;GO:0005525-IEA;GO:0005737-IEA;GO:0003746-IEA;GO:0003924-IEA;GO:0006414-IEA;GO:0006412-IEA \\ nucleotide binding-IEA;GTP binding-IEA;cytoplasm-IEA;translation elongation factor activity-IE		Bet v I/Major latex protein
TRINITY_DN2792_c0_g1	FvH4_1g05530.1	1.04175	7.53325	6.4915	7.23134	0.00221362	0.289821	bark storage protein A		Nucleoside phosphorylase domain	TRINITY_DN266087_c0_g1	FvH4_5g17730.1	0.29975	1.706	1.40625	5.69141	0.00641127	0.54393	U-box domain-containing protein 21-like		U box domain
TRINITY_DN5652_c0_g1	FvH4_3g01000.1	18.4557	133.061	114.606	7.20976	0.00279095	0.326674	acyl-CoA--sterol O-acyltransferase 1-like \\ 8.60E-04 \\ 100.00 %		Wax synthase domain	TRINITY_DN20056_c0_g1	FvH4_6g36530.1	0.2295	1.30225	1.07275	5.67429	0.00694174	0.566802	polygalacturonase QRT3-like		Parallel beta-helix repeat
TRINITY_DN29242_c0_g1	FvH4_2g37500.1	1.1655	8.396	7.2305	7.20378	3.87482e-06	0.0128357	vinorine synthase-like \\ 0.00E+00 \\ 65.55 % \\ GO:0016746-IEA;GO:0016747-IEA;GO:0047180-IEA;GO:0016740-IEA;GO:0050636-IEA \\ transferase activity, transferring acyl groups-IEA;transferase activity, transferring acyl groups other than amino-acyl groups-I		Transferase	TRINITY_DN13194_c0_g1	FvH4_7g21880.1	8.29775	46.8073	38.5095	5.64096	0.000132185	0.0725405	zinc finger protein ZAT12-like \\ 2.60E-156 \\ 80.19 % \\ GO:0000166-IEA;GO:0016020-IEA;GO:0016021-IEA;GO:0016310-IEA;GO:0004672-IEA;GO:0030247-IEA;GO:0016301-IEA;GO:0008889-IEA;GO:0004674-IEA;GO:0005524-IEA;GO:0016787-IEA;GO:0006468-IEA \\ nucleotide bin		Zinc finger C2H2-type
TRINITY_DN3790_c0_g1	FvH4_6g38760.1	9.21	66.0345	56.8245	7.16987	0.000264806	0.092598	glutathione S-transferase F9-like \\ 2.60E-145 \\ 93.44 % \\ GO:0016740-IEA;GO:0004364-IEA \\ transferase activity-IEA;glutathione transferase activity-IEA \\ GO:0004364 \\ glutathione transferase activity	glutathione S-transferase [EC:2.5.1.18]	Glutathione S-transferase, N-terminal	TRINITY_DN20854_c0_g1	FvH4_4g22140.1	4.33775	24.3463	20.0085	5.61264	1.03116e-06	0.00962631	DUF4228 domain-containing protein \\ 2.70E-42 \\ 75.04 % \\ GO:0016020-IEA;GO:0016021-IEA \\ membrane-IEA;integral component of membrane-IEA \\ GO:0016021 \\ integral component of membrane		Protein of unknown function DUF4228, plant
TRINITY_DN6010_c0_g1	FvH4_5g36280.1	3.5755	25.4292	21.8537	7.11208	1.47953e-05	0.0201682	PREDICTED: uncharacterized protein LOC101306919 \\ 5.90E-18 \\ 82.60 %			TRINITY_DN582_c0_g3	FvH4_3g43760.1	0.66125	3.70125	3.04	5.59735	0.00159182	0.262522	---NA--- \\ 0.00E+00 \\ 67.64 % \\ GO:0008270-IEA;GO:0006355-IBA;GO:0005634-IEA;GO:0005634-IBA;GO:0005622-IEA \\ zinc ion binding-IEA;regulation of transcription, DNA-templated-IBA;nucleus-IEA;nucleus-IBA;intracellular-IEA \\ GO:0005634;GO:0008270 \\ nucl
TRINITY_DN6072_c0_g1	FvH4_4g09360.1	0.432	3.05825	2.62625	7.07928	0.00233245	0.29791	cotton fiber protein \\ 5.60E-53 \\ 91.15 % \\ GO:0003723-IEA;GO:0005737-IBA;GO:0071014-IBA;GO:2000815-IBA;GO:0003729-IBA;GO:0071028-IBA;GO:1990904-IBA;GO:0016973-IBA;GO:0005634-IBA;GO:0003676-IEA \\ RNA binding-IEA;cytoplasm-IBA;post-mRNA release spliceo		Protein of unknown function DUF761, plant	TRINITY_DN1195_c0_g1	FvH4_6g10770.1	1.83525	10.2695	8.43425	5.5957	0.00392705	0.41906	iron-binding protein	ferritin heavy chain [EC:1.16.3.2]	Ferritin
TRINITY_DN1270_c0_g1	FvH4_4g06170.1	5.5505	39.273	33.7225	7.07558	3.38668e-05	0.0290017	DExH-box ATP-dependent RNA helicase DExH10 \\ 0.00E+00 \\ 94.20 % \\ GO:0003723-IEA;GO:0003724-IEA;GO:0000460-IBA;GO:0004386-IEA;GO:0004004-IBA;GO:0006401-IEA;GO:0006401-IBA;GO:0005524-IEA;GO:0005634-IBA;GO:0016787-IEA;GO:0003676-IEA \\ RNA binding-IEA;RN	ATP-dependent RNA helicase DOB1 [EC:3.6.4.13]	Helicase, C-terminal	TRINITY_DN1746_c0_g3	FvH4_4g34740.1	0.331	1.85025	1.51925	5.58988	0.00905092	0.647821	Transmembrane protein \\ 0.00E+00 \\ 85.07 % \\ GO:0047372-IEA;GO:0003824-IEA;GO:0004806-IEA;GO:0016787-IEA \\ acylglycerol lipase activity-IEA;catalytic activity-IEA;triglyceride lipase activity-IEA;hydrolase activity-IEA \\ GO:0004806;GO:0047372 \\ trig
TRINITY_DN15179_c0_g1	FvH4_6g38750.1	0.4275	2.9975	2.57	7.0117	8.39864e-06	0.0179678	transcription factor JUNGBRUNNEN 1-like \\ 7.80E-15 \\ 65.14 % \\ GO:0016779-IEA;GO:0003964-IEA;GO:0008270-IEA;GO:0006278-IEA;GO:0016740-IEA;GO:0003676-IEA \\ nucleotidyltransferase activity-IEA;RNA-directed DNA polymerase activity-IEA;zinc ion binding-IE		NAC domain	TRINITY_DN291562_c0_g1	FvH4_2g04120.1	1.69	9.3985	7.7085	5.56124	0.0113158	0.733391	zinc finger protein ZAT10-like		Zinc finger C2H2-type
TRINITY_DN6683_c0_g2	FvH4_5g09240.1	3.29975	23.0568	19.757	6.98742	0.00198758	0.275836	mitochondrial phosphate carrier protein 2, mitochondrial \\ 0.00E+00 \\ 91.12 % \\ GO:0016020-IEA;GO:0016021-IEA \\ membrane-IEA;integral component of membrane-IEA \\ GO:0016021 \\ integral component of membrane		Protein of unknown function DUF1677, Oryza sativa	TRINITY_DN6167_c0_g1	FvH4_2g41060.1	2.417	13.4108	10.9938	5.54851	9.46667e-05	0.0611713	probable WRKY transcription factor 40 isoform X1 \\ 0.00E+00 \\ 66.88 % \\ GO:0003677-IEA;GO:0003700-IEA;GO:0006355-IEA;GO:0043565-IEA;GO:0005634-IEA \\ DNA binding-IEA;DNA-binding transcription factor activity-IEA;regulation of transcription, DNA-templat		WRKY domain
TRINITY_DN21273_c0_g1	FvH4_2g16190.1	12.751	88.9057	76.1547	6.97245	0.00123479	0.210282	endochitinase 2-like \\ 1.90E-178 \\ 61.53 % \\ GO:0045332-IEA;GO:0016020-IEA;GO:0016021-IEA;GO:0004012-IBA;GO:0000324-IBA;GO:0005886-IBA \\ phospholipid translocation-IEA;membrane-IEA;integral component of membrane-IEA;phospholipid-translocating ATPase a	basic endochitinase B [EC:3.2.1.14]	Glycoside hydrolase, family 19, catalytic	TRINITY_DN3790_c0_g1	FvH4_6g38760.1	11.9038	66.0345	54.1307	5.54737	0.000348037	0.121348	glutathione S-transferase F9-like \\ 2.60E-145 \\ 93.44 % \\ GO:0016740-IEA;GO:0004364-IEA \\ transferase activity-IEA;glutathione transferase activity-IEA \\ GO:0004364 \\ glutathione transferase activity	glutathione S-transferase [EC:2.5.1.18]	Glutathione S-transferase, N-terminal
TRINITY_DN293693_c0_g1	FvH4_3g11090.1	0.187	1.303	1.116	6.96791	0.0146646	0.814002	flavin-dependent oxidoreductase FOX2-like \\ 0.00E+00 \\ 89.18 % \\ GO:0016020-IEA;GO:0016021-IEA;GO:0015171-IBA;GO:0003333-IBA;GO:0005886-IBA \\ membrane-IEA;integral component of membrane-IEA;amino acid transmembrane transporter activity-IBA;amino acid		FAD linked oxidase, N-terminal	TRINITY_DN730_c1_g1	FvH4_1g24380.1	2.26325	12.5258	10.2625	5.53441	0.001377	0.243102	putative laccase \\ 0.00E+00 \\ 92.03 % \\ GO:0046274-IEA;GO:0048046-IEA;GO:0046872-IEA;GO:0016491-IEA;GO:0005507-IEA;GO:0055114-IEA;GO:0052716-IEA;GO:0005576-IEA \\ lignin catabolic process-IEA;apoplast-IEA;metal ion binding-IEA;oxidoreductase activity-I	laccase [EC:1.10.3.2]	Multicopper oxidase, type 1
TRINITY_DN15604_c0_g1	FvH4_2g22290.1	0.17825	1.23775	1.0595	6.9439	0.0249747	1	ethylene-responsive transcription factor 3-like		AP2/ERF domain	TRINITY_DN171811_c0_g1	FvH4_1g18020.1	6.5125	36.0082	29.4957	5.5291	0.000562454	0.152397	VQ motif-containing protein 29-like \\ 1.10E-159 \\ 79.53 % \\ GO:0031429-IEA;GO:0001522-IEA;GO:0042254-IEA \\ box H/ACA snoRNP complex-IEA;pseudouridine synthesis-IEA;ribosome biogenesis-IEA \\ GO:0001522;GO:0031429;GO:0042254 \\ pseudouridine synthesis;		VQ
TRINITY_DN24955_c0_g1	FvH4_6g05020.1	0.24725	1.693	1.44575	6.84732	5.78524e-05	0.040141	probable LRR receptor-like serine/threonine-protein kinase RKF3 \\ 0.00E+00 \\ 83.35 % \\ GO:0016020-IEA;GO:0016021-IEA;GO:0016310-IEA;GO:0004672-IEA;GO:0016740-IEA;GO:0016301-IEA;GO:0004674-IEA;GO:0005524-IEA;GO:0006468-IEA \\ membrane-IEA;integral compo		Protein kinase domain	TRINITY_DN6680_c0_g1	FvH4_5g03390.1	2.0165	11.1493	9.13275	5.52901	4.27747e-05	0.0427192	putative Late embryogenesis abundant protein, LEA-14		Late embryogenesis abundant protein, LEA-14
TRINITY_DN7375_c0_g1	FvH4_7g20010.1	1.7015	11.6483	9.94675	6.84587	2.64593e-06	0.0101892	hypothetical protein RchiOBHm_Chr1g0363961 \\ 1.50E-114 \\ 96.54 % \\ GO:0009691-IEA;GO:0016787-IEA \\ cytokinin biosynthetic process-IEA;hydrolase activity-IEA \\ GO:0009691;GO:0016787 \\ cytokinin biosynthetic process;hydrolase activity			TRINITY_DN6110_c0_g1	FvH4_7g01730.1	4.6705	25.804	21.1335	5.52489	0.0306961	1	protein BPS1, chloroplastic-like \\ 0.00E+00 \\ 81.22 % \\ GO:0003677-IEA;GO:0003700-IEA;GO:0006351-IEA;GO:0046983-IEA;GO:0006355-IEA;GO:0000977-IEA;GO:0005634-IEA;GO:0045944-IEA \\ DNA binding-IEA;DNA-binding transcription factor activity-IEA;transcripti		Protein BYPASS-related
TRINITY_DN6723_c2_g1	FvH4_4g27520.1	9.89275	67.5405	57.6478	6.82727	0.000161391	0.069138	protein NIM1-INTERACTING 2 \\ 3.90E-96 \\ 76.75 % \\ GO:0003964-IEA;GO:0008270-IEA;GO:0006278-IEA;GO:0015074-IEA;GO:0003676-IEA \\ RNA-directed DNA polymerase activity-IEA;zinc ion binding-IEA;RNA-dependent DNA biosynthetic process-IEA;DNA integration-IEA		Protein NIM1-INTERACTING 2	TRINITY_DN10005_c0_g1	FvH4_2g23780.1	59.024	324.823	265.799	5.50324	0.0263336	1	basic 7S globulin-like \\ 0.00E+00 \\ 87.78 % \\ GO:0008152-IEA;GO:0042973-IEA;GO:0004553-IEA;GO:0016787-IEA;GO:0005975-IEA;GO:0016798-IEA \\ metabolic process-IEA;glucan endo-1,3-beta-D-glucosidase activity-IEA;hydrolase activity, hydrolyzing O-glycosyl		Aspartic peptidase A1 family
TRINITY_DN6680_c0_g1	FvH4_5g03390.1	1.64125	11.1493	9.508	6.79315	3.44141e-05	0.0292065	putative Late embryogenesis abundant protein, LEA-14		Late embryogenesis abundant protein, LEA-14	TRINITY_DN4034_c0_g1	FvH4_6g40280.1	9.49325	52.1067	42.6135	5.48882	0.00015116	0.0772242	heavy metal-associated isoprenylated plant protein 39-like
TRINITY_DN379_c0_g3	FvH4_3g35040.1	2.46875	16.7302	14.2615	6.77681	0.000867651	0.172693	zinc finger protein ZAT12-like \\ 5.30E-06 \\ 94.94 % \\ GO:0003723-IEA;GO:0003676-IEA \\ RNA binding-IEA;nucleic acid binding-IEA		Zinc finger C2H2-type	TRINITY_DN703_c0_g1	FvH4_5g38040.1	468.895	2558.81	2089.91	5.4571	0.00114212	0.219497	protein DMR6-LIKE OXYGENASE 2-like \\ 0.00E+00 \\ 90.77 % \\ GO:0051213-IEA;GO:0016491-IEA;GO:0045486-IEA;GO:0046872-IEA;GO:0055114-IEA \\ dioxygenase activity-IEA;oxidoreductase activity-IEA;naringenin 3-dioxygenase activity-IEA;metal ion binding-IEA;oxi		Oxoglutarate/iron-dependent dioxygenase
TRINITY_DN9094_c0_g1	FvH4_5g12460.1	1.098	7.4285	6.3305	6.76548	7.27345e-05	0.0453589	protein PLANT CADMIUM RESISTANCE 6-like \\ 0.00E+00 \\ 87.57 % \\ GO:0005506-IEA;GO:0009055-IEA;GO:0022900-IEA \\ iron ion binding-IEA;electron transfer activity-IEA;electron transport chain-IEA \\ GO:0005506;GO:0009055;GO:0022900 \\ iron ion binding;elec		PLAC8 motif-containing protein	TRINITY_DN954_c0_g2	FvH4_6g49970.1	1.96875	10.7152	8.7465	5.44267	0.00303817	0.366328	metalloendoproteinase 3-MMP-like \\ 4.60E-06 \\ 83.90 % \\ GO:0003735-IEA;GO:0005840-IEA;GO:0006412-IEA \\ structural constituent of ribosome-IEA;ribosome-IEA;translation-IEA		Peptidase M10, metallopeptidase
TRINITY_DN16311_c0_g1	FvH4_6g09300.1	1.186	8.021	6.835	6.76307	0.00649839	0.513742	probable calcium-binding protein CML43		EF-hand domain	TRINITY_DN7683_c0_g1	FvH4_4g23360.1	0.9685	5.247	4.2785	5.41766	0.000649345	0.16155	zinc finger E-box-binding homeobox 1		Domain of unknown function DUF4408
TRINITY_DN230031_c0_g1	FvH4_4g30950.1	0.626	4.21675	3.59075	6.73602	4.97601e-05	0.0368232	galactoside 2-alpha-L-fucosyltransferase-like \\ 0.00E+00 \\ 78.87 % \\ GO:0016757-IEA;GO:0036065-IEA;GO:0016020-IEA;GO:0016021-IEA;GO:0016740-IEA;GO:0008107-IEA;GO:0042546-IEA \\ transferase activity, transferring glycosyl groups-IEA;fucosylation-IEA;mem	xyloglucan fucosyltransferase [EC:2.4.1.-]	Xyloglucan fucosyltransferase	TRINITY_DN11859_c0_g1	FvH4_6g16460.1	1.07075	5.76875	4.698	5.38758	0.000955839	0.199061	4-coumarate--CoA ligase-like 7 \\ 0.00E+00 \\ 78.48 % \\ GO:0047077-IEA;GO:0003987-IEA;GO:0003824-IEA;GO:0016491-IEA;GO:0016020-IEA;GO:0016021-IEA;GO:0055114-IEA;GO:0016874-IEA \\ Photinus-luciferin 4-monooxygenase (ATP-hydrolyzing) activity-IEA;acetate-C	4-coumarate--CoA ligase [EC:6.2.1.12]	AMP-dependent synthetase/ligase
TRINITY_DN11008_c0_g1	FvH4_1g16150.1	2.00575	13.4355	11.4298	6.69849	5.19293e-05	0.037583	mitogen-activated protein kinase kinase kinase 3-like		Protein kinase domain	TRINITY_DN5694_c0_g1	FvH4_5g16230.1	32.4965	174.461	141.965	5.36862	0.000681636	0.165883	protein EDS1L-like \\ 0.00E+00 \\ 69.94 % \\ GO:0052689-IEA;GO:0006629-IEA;GO:0016787-IEA \\ carboxylic ester hydrolase activity-IEA;lipid metabolic process-IEA;hydrolase activity-IEA \\ GO:0006629;GO:0052689 \\ lipid metabolic process;carboxylic ester hy		Fungal lipase-like domain
TRINITY_DN13882_c0_g1	FvH4_6g20940.1	0.64	4.2785	3.6385	6.68516	0.00043476	0.121209	rho GTPase-activating protein gacG-like \\ 0.00E+00 \\ 77.78 % \\ GO:0016746-IEA;GO:0016747-IEA;GO:0047180-IEA;GO:0016740-IEA;GO:0047162-IEA \\ transferase activity, transferring acyl groups-IEA;transferase activity, transferring acyl groups other than am			TRINITY_DN24639_c0_g1	FvH4_6g18630.1	1.34225	7.2035	5.86125	5.36673	0.000819018	0.183235	protein BIC1 \\ 1.40E-19 \\ 83.24 % \\ GO:0055085-IEA;GO:0015297-IEA;GO:0016020-IEA;GO:0016021-IEA;GO:0006855-IEA;GO:0015238-IEA \\ transmembrane transport-IEA;antiporter activity-IEA;membrane-IEA;integral component of membrane-IEA;drug transmembrane tran
TRINITY_DN6136_c0_g1	FvH4_1g20180.1	0.979	6.513	5.534	6.65271	0.00873493	0.60758	PREDICTED: uncharacterized protein LOC101308504 isoform X1 \\ 0.00E+00 \\ 87.19 % \\ GO:0016757-IEA;GO:0016020-IEA;GO:0016021-IEA;GO:0008378-IEA;GO:0005794-IEA;GO:0006486-IEA;GO:0016740-IEA;GO:0000139-IEA \\ transferase activity, transferring glycosyl gro			TRINITY_DN10937_c0_g1	FvH4_7g13250.1	0.21625	1.1585	0.94225	5.35723	0.00125931	0.232866	mitogen-activated protein kinase kinase kinase NPK1-like \\ 0.00E+00 \\ 59.61 % \\ GO:0000165-IEA;GO:0000186-IEA;GO:0004709-IEA;GO:0016310-IEA;GO:0004672-IEA;GO:0016740-IEA;GO:0016301-IEA;GO:0005524-IEA;GO:0006468-IEA;GO:0005622-IEA \\ MAPK cascade-IEA;ac		Protein kinase domain
TRINITY_DN4817_c0_g1	FvH4_3g14410.1	0.583	3.8715	3.2885	6.64065	0.0123642	0.7393	---NA--- \\ 9.20E-101 \\ 93.49 % \\ GO:0000166-IEA;GO:0042626-IEA;GO:0055085-IEA;GO:0016020-IEA;GO:0016021-IEA;GO:0005524-IEA;GO:0016887-IEA \\ nucleotide binding-IEA;ATPase activity, coupled to transmembrane movement of substances-IEA;transmembrane trans			TRINITY_DN13882_c0_g1	FvH4_6g20940.1	0.80325	4.2785	3.47525	5.32649	0.00054857	0.151154	rho GTPase-activating protein gacG-like \\ 0.00E+00 \\ 77.78 % \\ GO:0016746-IEA;GO:0016747-IEA;GO:0047180-IEA;GO:0016740-IEA;GO:0047162-IEA \\ transferase activity, transferring acyl groups-IEA;transferase activity, transferring acyl groups other than am
TRINITY_DN3632_c0_g3	FvH4_2g35330.1	8.0905	53.524	45.4335	6.61566	0.00113205	0.200547	NADP-dependent malic enzyme isoform X1 \\ 0.00E+00 \\ 94.20 % \\ GO:0051287-IEA;GO:0016491-IEA;GO:0046872-IEA;GO:0004471-IEA;GO:0004470-IEA;GO:0055114-IEA \\ NAD binding-IEA;oxidoreductase activity-IEA;metal ion binding-IEA;malate dehydrogenase (decarboxy	malate dehydrogenase (oxaloacetate-decarboxylating)(NADP+) [EC:1.1.1.40]	Malic oxidoreductase	TRINITY_DN7203_c0_g1	FvH4_4g36510.1	1.51575	8.0725	6.55675	5.32575	0.00090959	0.194056	gibberellin 2-beta-dioxygenase 8-like \\ 0.00E+00 \\ 82.30 % \\ GO:0051213-IEA;GO:0016491-IEA;GO:0046872-IEA;GO:0055114-IEA;GO:0045543-IEA \\ dioxygenase activity-IEA;oxidoreductase activity-IEA;metal ion binding-IEA;oxidation-reduction process-IEA;gibber	gibberellin 2-oxidase [EC:1.14.11.13]	Oxoglutarate/iron-dependent dioxygenase
TRINITY_DN15814_c0_g1	FvH4_5g03420.1	9.7985	64.6983	54.8997	6.60287	1.32432e-06	0.00776886	putative Late embryogenesis abundant protein, LEA-14 \\ 1.40E-51 \\ 61.74 %		Late embryogenesis abundant protein, LEA-14	TRINITY_DN7625_c0_g1	FvH4_2g15070.1	4.31	22.9447	18.6347	5.32361	0.000941349	0.197818	NAD(P)H-quinone oxidoreductase subunit 3 like \\ 0.00E+00 \\ 82.64 % \\ GO:0016020-IEA;GO:0016021-IEA;GO:0005524-IEA \\ membrane-IEA;integral component of membrane-IEA;ATP binding-IEA \\ GO:0005524;GO:0016021 \\ ATP binding;integral component of membrane
TRINITY_DN983_c0_g1	FvH4_3g14250.1	0.35	2.3105	1.9605	6.60143	0.00309724	0.343525	hypothetical protein RchiOBHm_Chr5g0023481 \\ 6.00E-57 \\ 61.75 % \\ GO:0008150-ND;GO:0016020-IEA;GO:0016021-IEA;GO:0005575-ND;GO:0003674-ND \\ biological_process-ND;membrane-IEA;integral component of membrane-IEA;cellular_component-ND;molecular_function-			TRINITY_DN41773_c0_g2	FvH4_2g25280.1	0.202	1.07425	0.87225	5.31807	0.00408416	0.429276	desiccation-related protein PCC13-62 \\ 7.60E-34 \\ 65.53 % \\ GO:0003824-IEA;GO:0016020-IEA;GO:0016021-IEA \\ catalytic activity-IEA;membrane-IEA;integral component of membrane-IEA		Ferritin-like
TRINITY_DN113_c4_g1	FvH4_7g26920.1	5.452	35.8897	30.4378	6.58286	5.72399e-06	0.0157496	ethylene-responsive transcription factor 2-like \\ 3.40E-170 \\ 64.54 % \\ GO:0003677-IEA;GO:0003700-IEA;GO:0006351-IEA;GO:0006355-IEA;GO:0005634-IEA \\ DNA binding-IEA;DNA-binding transcription factor activity-IEA;transcription, DNA-templated-IEA;regulat	EREBP-like factor	AP2/ERF domain	TRINITY_DN393_c1_g2	FvH4_1g03960.1	6.3215	33.6103	27.2888	5.31682	4.0479e-07	0.00686155	potassium channel AKT1 \\ 0.00E+00 \\ 94.66 % \\ GO:0006813-IEA;GO:0016020-IEA;GO:0016021-IEA;GO:0034765-IEA;GO:0010107-IEA;GO:0042802-IEA;GO:0071805-IEA;GO:0055085-IEA;GO:0009651-IEA;GO:0090333-IEA;GO:0009414-IEA;GO:0005242-IEA;GO:0005267-IEA;GO:0048767-		Cyclic nucleotide-binding domain
TRINITY_DN1441_c0_g1	FvH4_2g23890.1	5.75675	37.8453	32.0885	6.57407	1.97749e-05	0.0225278	RING-H2 finger protein ATL54-like \\ 0.00E+00 \\ 62.19 % \\ GO:0016020-IEA;GO:0016021-IEA \\ membrane-IEA;integral component of membrane-IEA \\ GO:0016021 \\ integral component of membrane		Zinc finger, RING-type	TRINITY_DN7241_c0_g1	FvH4_3g28370.1	7.81475	41.5328	33.718	5.31466	4.75072e-05	0.0445998	glucan endo-1,3-beta-glucosidase-like \\ 0.00E+00 \\ 89.86 % \\ GO:0008152-IEA;GO:0042973-IEA;GO:0004553-IEA;GO:0016798-IEA;GO:0005975-IEA;GO:0016787-IEA \\ metabolic process-IEA;glucan endo-1,3-beta-D-glucosidase activity-IEA;hydrolase activity, hydrolyz		Glycoside hydrolase family 17
TRINITY_DN20854_c0_g1	FvH4_4g22140.1	3.7095	24.3463	20.6367	6.56322	2.37425e-07	0.00375047	DUF4228 domain-containing protein \\ 2.70E-42 \\ 75.04 % \\ GO:0016020-IEA;GO:0016021-IEA \\ membrane-IEA;integral component of membrane-IEA \\ GO:0016021 \\ integral component of membrane		Protein of unknown function DUF4228, plant	TRINITY_DN6776_c0_g1	FvH4_2g25570.1	2.09825	11.0395	8.94125	5.26129	1.69208e-05	0.0296182	ABC transporter C family member 14-like \\ 0.00E+00 \\ 90.87 % \\ GO:0042626-IEA;GO:0000166-IEA;GO:0055085-IEA;GO:0016020-IEA;GO:0016021-IEA;GO:0005524-IEA;GO:0016887-IEA \\ ATPase activity, coupled to transmembrane movement of substances-IEA;nucleotide b		ABC transporter-like
TRINITY_DN2689_c1_g1	FvH4_6g10800.1	0.16625	1.08925	0.923	6.55188	0.00159921	0.244968	receptor-like protein 12 \\ 0.00E+00 \\ 79.09 % \\ GO:0016020-IEA;GO:0016021-IEA \\ membrane-IEA;integral component of membrane-IEA \\ GO:0016021 \\ integral component of membrane		Leucine-rich repeat	TRINITY_DN1441_c0_g1	FvH4_2g23890.1	7.2415	37.8453	30.6037	5.22616	3.00364e-05	0.0362253	RING-H2 finger protein ATL54-like \\ 0.00E+00 \\ 62.19 % \\ GO:0016020-IEA;GO:0016021-IEA \\ membrane-IEA;integral component of membrane-IEA \\ GO:0016021 \\ integral component of membrane		Zinc finger, RING-type
TRINITY_DN115897_c0_g1	FvH4_1g03760.1	0.97175	6.30475	5.333	6.48804	0.000215824	0.0825951	early nodulin-93-like \\ 1.40E-14 \\ 92.89 % \\ GO:0008152-IEA;GO:0008422-IEA;GO:0102483-IEA;GO:0004553-IEA;GO:0005975-IEA;GO:0016798-IEA;GO:0016787-IEA \\ metabolic process-IEA;beta-glucosidase activity-IEA;scopolin beta-glucosidase activity-IEA;hydrolas		Early nodulin 93 ENOD93 protein	TRINITY_DN5299_c0_g1	FvH4_6g18220.1	13.8837	72.4035	58.5197	5.21498	0.000392545	0.129062	IQ domain-containing protein IQM3-like \\ 0.00E+00 \\ 80.41 %		IQ motif, EF-hand binding site
TRINITY_DN27963_c0_g1	FvH4_5g16370.1	2.2925	14.8558	12.5633	6.48015	0.00282992	0.32836	CDP-diacylglycerol-glycerol-3-phosphate 3-phosphatidyltransferase \\ 1.80E-111 \\ 87.48 % \\ GO:0009773-IBA;GO:0046872-IEA;GO:0009055-IEA;GO:0020037-IEA;GO:0022900-IEA \\ photosynthetic electron transport in photosystem I-IBA;metal ion binding-IEA;electro			TRINITY_DN1290_c2_g1	FvH4_4g11780.1	2.33	12.1435	9.8135	5.2118	0.000363167	0.123381	UDP-glycosyltransferase 92A1-like \\ 0.00E+00 \\ 82.33 % \\ GO:0016757-IEA;GO:0016758-IEA;GO:0016740-IEA \\ transferase activity, transferring glycosyl groups-IEA;transferase activity, transferring hexosyl groups-IEA;transferase activity-IEA \\ GO:0016758		UDP-glucuronosyl/UDP-glucosyltransferase
TRINITY_DN2720_c0_g1	FvH4_2g22790.1	0.8865	5.716	4.8295	6.44783	2.08573e-05	0.0225278	beta-carotene isomerase D27, chloroplastic \\ 6.60E-99 \\ 79.34 % \\ GO:0005506-IEA;GO:0009507-IEA;GO:0016859-IEA;GO:1901601-IEA;GO:0010223-IEA;GO:0016853-IEA \\ iron ion binding-IEA;chloroplast-IEA;cis-trans isomerase activity-IEA;strigolactone biosynthe	beta-carotene isomerase [EC:5.2.1.14]	Domain of unknown function DUF4033	TRINITY_DN1603_c1_g1	FvH4_6g24120.1	5.5325	28.8305	23.298	5.21112	7.57846e-05	0.0556309	heat stress transcription factor B-3	heat shock transcription factor, other eukaryote	Heat shock factor (HSF)-type, DNA-binding
TRINITY_DN2312_c0_g1	FvH4_6g18200.1	7.0795	45.4693	38.3897	6.42266	0.00192329	0.271047	plant cysteine oxidase 2-like \\ 6.90E-05 \\ 91.02 % \\ GO:0016747-IEA \\ transferase activity, transferring acyl groups other than amino-acyl groups-IEA	cysteamine dioxygenase [EC:1.13.11.19]	RmlC-like cupin domain superfamily	TRINITY_DN15483_c0_g1	FvH4_2g14470.1	6.0915	31.7415	25.65	5.21079	5.20181e-06	0.0174224	pathogen-related protein-like \\ 1.40E-162 \\ 88.03 %		Rossmann-like alpha/beta/alpha sandwich fold
TRINITY_DN23992_c0_g3	FvH4_2g25960.1	0.729	4.67175	3.94275	6.40844	0.000282349	0.0955962	probable pectinesterase/pectinesterase inhibitor 7 \\ 0.00E+00 \\ 89.28 % \\ GO:0004857-IEA;GO:0005618-IEA;GO:0043086-IEA;GO:0045330-IEA;GO:0030599-IEA;GO:0042545-IEA;GO:0045490-IEA;GO:0016787-IEA \\ enzyme inhibitor activity-IEA;cell wall-IEA;negative re	pectinesterase [EC:3.1.1.11]	Pectinesterase, catalytic	TRINITY_DN778_c0_g1	FvH4_1g05090.1	12.5398	64.818	52.2782	5.169	0.000550017	0.151154	aldehyde dehydrogenase family 2 member C4-like \\ 0.00E+00 \\ 94.23 % \\ GO:0050269-IEA;GO:0016491-IEA;GO:0004030-IEA;GO:0055114-IEA;GO:0009699-IEA;GO:0016620-IEA \\ coniferyl-aldehyde dehydrogenase activity-IEA;oxidoreductase activity-IEA;aldehyde dehydr	coniferyl-aldehyde dehydrogenase [EC:1.2.1.68]	Aldehyde dehydrogenase domain
TRINITY_DN28502_c0_g1	FvH4_3g21130.1	7.02025	44.874	37.8537	6.39208	0.00173204	0.256874	putative wound-induced protein \\ 2.20E-58 \\ 79.38 % \\ GO:0046983-IEA \\ protein dimerization activity-IEA \\ GO:0046983 \\ protein dimerization activity		Protein of unknown function wound-induced	TRINITY_DN6321_c0_g1	FvH4_6g02270.1	0.661	3.402	2.741	5.14675	0.000701561	0.168821	ethylene-responsive transcription factor 1B-like \\ 1.70E-11 \\ 54.73 % \\ GO:0003964-IEA;GO:0016779-IEA;GO:0008270-IEA;GO:0090502-IEA;GO:0005739-IEA;GO:0006278-IEA;GO:0016740-IEA;GO:0004523-IEA;GO:0003676-IEA \\ RNA-directed DNA polymerase activity-IEA;n	ethylene-responsive transcription factor 1	AP2/ERF domain
TRINITY_DN3146_c0_g1	FvH4_5g01270.1	1.3065	8.344	7.0375	6.38653	6.67777e-07	0.00587156	phospholipase D beta 1-like \\ 0.00E+00 \\ 83.88 % \\ GO:0046470-IEA;GO:0003824-IEA;GO:0016020-IEA;GO:0016042-IEA;GO:0005509-IEA;GO:0004630-IEA;GO:0016787-IEA;GO:0070290-IEA \\ phosphatidylcholine metabolic process-IEA;catalytic activity-IEA;membrane-IEA;	phospholipase D1/2 [EC:3.1.4.4]	C2 domain	TRINITY_DN450_c3_g1	FvH4_3g17550.1	7.72275	39.7183	31.9955	5.14302	0.000845399	0.186697	7-deoxyloganetin glucosyltransferase-like \\ 0.00E+00 \\ 83.83 % \\ GO:0016757-IEA;GO:0016758-IEA;GO:0016740-IEA \\ transferase activity, transferring glycosyl groups-IEA;transferase activity, transferring hexosyl groups-IEA;transferase activity-IEA \\ GO		UDP-glucuronosyl/UDP-glucosyltransferase
TRINITY_DN703_c0_g1	FvH4_5g38040.1	401.039	2558.81	2157.77	6.38045	0.000983262	0.185935	protein DMR6-LIKE OXYGENASE 2-like \\ 0.00E+00 \\ 90.77 % \\ GO:0051213-IEA;GO:0016491-IEA;GO:0045486-IEA;GO:0046872-IEA;GO:0055114-IEA \\ dioxygenase activity-IEA;oxidoreductase activity-IEA;naringenin 3-dioxygenase activity-IEA;metal ion binding-IEA;oxi		Oxoglutarate/iron-dependent dioxygenase	TRINITY_DN26_c0_g1	FvH4_3g16070.1	2.13025	10.9265	8.79625	5.12921	1.01964e-06	0.00962631	putative serine/threonine-protein kinase \\ 0.00E+00 \\ 91.33 % \\ GO:0000166-IEA;GO:0016310-IEA;GO:0004672-IEA;GO:0016740-IEA;GO:0016301-IEA;GO:0004674-IEA;GO:0005524-IEA;GO:0006468-IEA \\ nucleotide binding-IEA;phosphorylation-IEA;protein kinase activit		Protein kinase domain
TRINITY_DN5023_c0_g1	FvH4_5g01350.1	73.6097	467.121	393.512	6.34592	8.76573e-05	0.0501944	hydroxymethylglutaryl-CoA synthase \\ 1.30E-135 \\ 99.26 % \\ GO:0016746-IEA;GO:0008299-IEA;GO:0003824-IEA;GO:0006629-IEA;GO:0008202-IEA;GO:0006694-IEA;GO:0016740-IEA;GO:0004421-IEA;GO:0016126-IEA \\ transferase activity, transferring acyl groups-IEA;isop	hydroxymethylglutaryl-CoA synthase [EC:2.3.3.10]	Hydroxymethylglutaryl-coenzyme A synthase, active site	TRINITY_DN503_c0_g1	FvH4_3g09340.1	1.7595	9.02375	7.26425	5.12859	0.007151	0.57595	heat stress transcription factor B-2a-like \\ 3.50E-100 \\ 77.59 % \\ GO:0000166-IEA;GO:0046177-IEA;GO:0046177-IBA;GO:0046316-IEA;GO:0046316-IBA;GO:0016310-IEA;GO:0016740-IEA;GO:0016301-IEA;GO:0005975-IEA;GO:0005524-IEA \\ nucleotide binding-IEA;D-glucona	heat shock transcription factor, other eukaryote	Heat shock factor (HSF)-type, DNA-binding
TRINITY_DN71430_c1_g1	FvH4_1g23120.1	0.79625	5.0525	4.25625	6.34537	0.0221646	1	2-alkenal reductase (NADP(+)-dependent)-like \\ 6.10E-109 \\ 75.57 % \\ GO:0003677-IEA;GO:0000775-IEA;GO:0003696-IEA \\ DNA binding-IEA;chromosome, centromeric region-IEA;satellite DNA binding-IEA \\ GO:0000775;GO:0003696 \\ chromosome, centromeric region		GroES-like superfamily	TRINITY_DN6136_c0_g1	FvH4_1g20180.1	1.2795	6.513	5.2335	5.09027	0.012279	0.765126	PREDICTED: uncharacterized protein LOC101308504 isoform X1 \\ 0.00E+00 \\ 87.19 % \\ GO:0016757-IEA;GO:0016020-IEA;GO:0016021-IEA;GO:0008378-IEA;GO:0005794-IEA;GO:0006486-IEA;GO:0016740-IEA;GO:0000139-IEA \\ transferase activity, transferring glycosyl gro
TRINITY_DN7411_c0_g1	FvH4_7g24650.1	1.92425	12.206	10.2817	6.34325	0.000345317	0.105932	probable protein phosphatase 2C 25 \\ 0.00E+00 \\ 87.54 %	protein phosphatase 1L [EC:3.1.3.16]	PPM-type phosphatase, divalent cation binding	TRINITY_DN3317_c0_g2	FvH4_3g42290.1	21.4977	109.147	87.649	5.07712	9.31496e-07	0.00925697	farnesyl pyrophosphate synthase \\ 2.40E-123 \\ 94.59 % \\ GO:0004337-IEA;GO:0008299-IEA;GO:0004161-IEA;GO:0016740-IEA \\ geranyltranstransferase activity-IEA;isoprenoid biosynthetic process-IEA;dimethylallyltranstransferase activity-IEA;transferase activ	farnesyl diphosphate synthase [EC:2.5.1.1 2.5.1.10]	Polyprenyl synthetase
TRINITY_DN15483_c0_g1	FvH4_2g14470.1	5.00875	31.7415	26.7327	6.33721	4.24684e-06	0.0139183	pathogen-related protein-like \\ 1.40E-162 \\ 88.03 %		Rossmann-like alpha/beta/alpha sandwich fold	TRINITY_DN12216_c0_g1	FvH4_5g36230.1	3.7505	18.916	15.1655	5.04359	0.00193747	0.288905	RING-H2 finger protein ATL11-like \\ 0.00E+00 \\ 68.55 % \\ GO:0016020-IEA;GO:0016021-IEA \\ membrane-IEA;integral component of membrane-IEA \\ GO:0016021 \\ integral component of membrane	E3 ubiquitin-protein ligase ATL6/9/15/31/42/55 [EC:2.3.2.27]	Zinc finger, RING-type
TRINITY_DN6724_c0_g1	FvH4_6g47740.1	1.34625	8.522	7.17575	6.33018	8.56118e-05	0.0497631	UDP-glycosyltransferase 13-like \\ 0.00E+00 \\ 86.59 % \\ GO:0016757-IEA;GO:0016758-IEA;GO:0016740-IEA \\ transferase activity, transferring glycosyl groups-IEA;transferase activity, transferring hexosyl groups-IEA;transferase activity-IEA \\ GO:0016758 \		Protein of unknown function DUF863, plant	TRINITY_DN14302_c0_g1	FvH4_3g18790.1	0.2105	1.061	0.8505	5.04038	0.000820361	0.183402	sodium/calcium exchanger NCL2-like \\ 0.00E+00 \\ 84.53 % \\ GO:0055085-IEA;GO:0016020-IEA;GO:0016021-IEA;GO:0005509-IEA;GO:0016310-IEA;GO:0016301-IEA \\ transmembrane transport-IEA;membrane-IEA;integral component of membrane-IEA;calcium ion binding-IEA;p		EF-hand domain
TRINITY_DN3469_c2_g1	FvH4_7g03210.1	1.7045	10.7155	9.011	6.28659	0.00941197	0.634619	NADPH:quinone oxidoreductase-like \\ 2.10E-13 \\ 62.65 % \\ GO:0003677-IEA;GO:0006355-IEA;GO:0005634-IEA \\ DNA binding-IEA;regulation of transcription, DNA-templated-IEA;nucleus-IEA		NADPH-dependent FMN reductase-like	TRINITY_DN3923_c2_g1	FvH4_4g15010.1	6.58825	33.1532	26.565	5.03218	0.000694008	0.167853	2-hydroxyisoflavanone dehydratase-like \\ 0.00E+00 \\ 83.90 % \\ GO:0052689-IEA;GO:0016020-IEA;GO:0016021-IEA;GO:0016829-IEA;GO:0016787-IEA;GO:0033987-IEA \\ carboxylic ester hydrolase activity-IEA;membrane-IEA;integral component of membrane-IEA;lyase act		Alpha/beta hydrolase fold-3
TRINITY_DN1131_c0_g1	FvH4_4g19500.1	11.5508	71.8665	60.3158	6.2218	0.00216264	0.287175	glucan endo-1,3-beta-glucosidase, basic vacuolar isoform \\ 0.00E+00 \\ 85.64 % \\ GO:0008152-IEA;GO:0042973-IEA;GO:0004553-IEA;GO:0016798-IEA;GO:0005975-IEA;GO:0016787-IEA \\ metabolic process-IEA;glucan endo-1,3-beta-D-glucosidase activity-IEA;hydrolase		Glycoside hydrolase family 17	TRINITY_DN5614_c0_g1	FvH4_7g24390.1	2.09775	10.5377	8.44	5.02336	1.11077e-07	0.00314948	putative MENTAL domain-containing protein \\ 2.70E-99 \\ 87.74 % \\ GO:0016020-IEA;GO:0016021-IEA \\ membrane-IEA;integral component of membrane-IEA \\ GO:0016021 \\ integral component of membrane		MENTAL domain
TRINITY_DN30351_c0_g1	FvH4_7g34120.1	4.0245	24.9895	20.965	6.20934	4.47366e-05	0.0342645	s-norcoclaurine synthase 2 \\ 1.60E-86 \\ 86.59 % \\ GO:0000166-IEA;GO:0005525-IEA;GO:0005737-IEA;GO:0003746-IEA;GO:0003924-IEA;GO:0006414-IEA;GO:0006412-IEA \\ nucleotide binding-IEA;GTP binding-IEA;cytoplasm-IEA;translation elongation factor activity-IE		Bet v I/Major latex protein	TRINITY_DN2481_c0_g1	FvH4_6g36520.1	75.9267	380.236	304.309	5.00793	0.000180703	0.0860419	beta-amyrin synthase-like \\ 0.00E+00 \\ 92.32 % \\ GO:0016866-IEA;GO:0016853-IEA \\ intramolecular transferase activity-IEA;isomerase activity-IEA \\ GO:0016866 \\ intramolecular transferase activity	beta-amyrin synthase [EC:5.4.99.39]	Terpene synthase, conserved site
TRINITY_DN156_c0_g1	FvH4_4g02990.1	1.9	11.784	9.884	6.20211	3.42311e-05	0.0291775	cellulose synthase-like protein G2 isoform X1 \\ 0.00E+00 \\ 84.66 % \\ GO:0016757-IEA;GO:0016020-IEA;GO:0016021-IEA;GO:0016760-IEA;GO:0071555-IEA;GO:0016740-IEA;GO:0030244-IEA \\ transferase activity, transferring glycosyl groups-IEA;membrane-IEA;integra		Cellulose synthase	TRINITY_DN2720_c0_g1	FvH4_2g22790.1	1.14225	5.716	4.57375	5.00416	2.00191e-05	0.0309914	beta-carotene isomerase D27, chloroplastic \\ 6.60E-99 \\ 79.34 % \\ GO:0005506-IEA;GO:0009507-IEA;GO:0016859-IEA;GO:1901601-IEA;GO:0010223-IEA;GO:0016853-IEA \\ iron ion binding-IEA;chloroplast-IEA;cis-trans isomerase activity-IEA;strigolactone biosynthe	beta-carotene isomerase [EC:5.2.1.14]	Domain of unknown function DUF4033
TRINITY_DN14867_c0_g1	FvH4_5g03430.1	58.2893	361.089	302.8	6.19478	8.03952e-05	0.0475381	putative Late embryogenesis abundant protein, LEA-14 \\ 3.60E-97 \\ 94.98 % \\ GO:0008270-IEA;GO:0016829-IEA;GO:0004089-IEA;GO:0015976-IEA \\ zinc ion binding-IEA;lyase activity-IEA;carbonate dehydratase activity-IEA;carbon utilization-IEA \\ GO:0004089;G		Late embryogenesis abundant protein, LEA-14	TRINITY_DN983_c0_g2	FvH4_3g14270.1	0.6975	3.48225	2.78475	4.99247	0.000176331	0.0852783	---NA---
TRINITY_DN234455_c0_g1	FvH4_7g28860.1	2.471	15.2995	12.8285	6.19162	3.97666e-05	0.032117	LysM domain containing protein		LysM domain superfamily	TRINITY_DN1131_c0_g1	FvH4_4g19500.1	14.4023	71.8665	57.4642	4.98995	0.00253215	0.334964	glucan endo-1,3-beta-glucosidase, basic vacuolar isoform \\ 0.00E+00 \\ 85.64 % \\ GO:0008152-IEA;GO:0042973-IEA;GO:0004553-IEA;GO:0016798-IEA;GO:0005975-IEA;GO:0016787-IEA \\ metabolic process-IEA;glucan endo-1,3-beta-D-glucosidase activity-IEA;hydrolase		Glycoside hydrolase family 17
TRINITY_DN3534_c0_g1	FvH4_2g23800.1	7.8335	48.4143	40.5808	6.18041	9.22706e-05	0.0517897	phenazine biosynthesis-like domain-containing protein 1 \\ 0.00E+00 \\ 86.58 % \\ GO:0009058-IEA;GO:0003824-IEA;GO:0102943-IEA;GO:0016853-IEA \\ biosynthetic process-IEA;catalytic activity-IEA;trans-2,3-dihydro-3-hydroxy-anthranilate isomerase activity-IE		Phenazine biosynthesis PhzF protein	TRINITY_DN4477_c1_g1	FvH4_7g11320.1	10.193	50.7175	40.5245	4.97572	0.0057921	0.514028	pectinesterase 2 \\ 0.00E+00 \\ 86.97 % \\ GO:0004857-IEA;GO:0005618-IEA;GO:0043086-IEA;GO:0045330-IEA;GO:0046910-IBA;GO:0071555-IEA;GO:0030599-IEA;GO:0030599-IBA;GO:0005576-IEA;GO:0042545-IEA;GO:0045490-IEA;GO:0016787-IEA \\ enzyme inhibitor activity-IEA	pectinesterase [EC:3.1.1.11]	Pectinesterase, catalytic
TRINITY_DN2810_c3_g1	FvH4_2g29490.1	0.243	1.49725	1.25425	6.16152	0.000416608	0.118838	UPF0481 protein At3g47200-like \\ 5.30E-166 \\ 73.32 % \\ GO:0005524-IEA \\ ATP binding-IEA		Protein of unknown function DUF247, plant	TRINITY_DN2958_c0_g1	FvH4_2g35260.1	4.69375	23.3535	18.6597	4.97545	3.28413e-05	0.0381075	receptor-like protein kinase HSL1 \\ 0.00E+00 \\ 83.89 % \\ GO:0000166-IEA;GO:0000165-IEA;GO:0000186-IEA;GO:0016491-IEA;GO:0016020-IEA;GO:0016021-IEA;GO:0004709-IEA;GO:0055114-IEA;GO:0016310-IEA;GO:0016740-IEA;GO:0016301-IEA;GO:0032440-IEA;GO:0004672-IEA;		Protein kinase domain
TRINITY_DN8266_c0_g1	FvH4_1g14560.1	38.8017	238.178	199.376	6.13832	2.86089e-05	0.0263554	hypothetical protein RchiOBHm_Chr2g0103311			TRINITY_DN379_c0_g2	FvH4_3g35020.1	1.73275	8.60025	6.8675	4.96335	0.00219904	0.31119	zinc finger protein ZAT12-like \\ 1.90E-66 \\ 91.18 % \\ GO:0003735-IBA;GO:0022627-IBA;GO:0000028-IBA;GO:0005840-IEA \\ structural constituent of ribosome-IBA;cytosolic small ribosomal subunit-IBA;ribosomal small subunit assembly-IBA;ribosome-IEA \\ GO:00		Zinc finger C2H2-type
TRINITY_DN17800_c0_g1	FvH4_2g24610.1	1.24	7.5725	6.3325	6.10685	1.25692e-07	0.00331136	nucleosome assembly protein 1;2			TRINITY_DN2678_c0_g1	FvH4_2g17100.1	174.365	862.973	688.608	4.94923	0.00044951	0.138187	3-hydroxy-3-methylglutaryl-coenzyme A reductase 1-like \\ 0.00E+00 \\ 92.01 % \\ GO:0005789-IEA;GO:0050662-IEA;GO:0016616-IEA;GO:0016491-IEA;GO:0008299-IEA;GO:0050661-IEA;GO:0016020-IEA;GO:0016021-IEA;GO:0055114-IEA;GO:0015936-IEA;GO:0004420-IEA;GO:000578	hydroxymethylglutaryl-CoA reductase (NADPH) [EC:1.1.1.34]	Hydroxymethylglutaryl-CoA reductase, class I/II
TRINITY_DN1470_c0_g2	FvH4_1g19380.1	17.368	106.02	88.6517	6.10432	0.000121353	0.0584142	putative UDP-rhamnose:rhamnosyltransferase 1 \\ 0.00E+00 \\ 85.48 % \\ GO:0016757-IEA;GO:0016758-IEA;GO:0016020-IEA;GO:0016021-IEA;GO:0016740-IEA \\ transferase activity, transferring glycosyl groups-IEA;transferase activity, transferring hexosyl groups-I		UDP-glucuronosyl/UDP-glucosyltransferase	TRINITY_DN450_c1_g1	FvH4_4g19070.1	539.379	2664.44	2125.06	4.93983	0.00138622	0.243761	major allergen Pru ar 1-like \\ 8.20E-132 \\ 84.58 % \\ GO:0005737-IBA;GO:0009738-IBA;GO:0080163-IBA;GO:0038023-IBA;GO:0010427-IBA;GO:0032515-IEA;GO:0004864-IBA;GO:0005634-IBA \\ cytoplasm-IBA;abscisic acid-activated signaling pathway-IBA;regulation of pr		Bet v I/Major latex protein
TRINITY_DN6888_c0_g1	FvH4_3g11300.1	7.155	43.4895	36.3345	6.0782	0.00145303	0.231695	reticuline oxidase-like protein \\ 0.00E+00 \\ 91.60 % \\ GO:0071949-IEA;GO:0003824-IEA;GO:0016491-IEA;GO:0050660-IEA;GO:0055114-IEA;GO:0050328-IEA \\ FAD binding-IEA;catalytic activity-IEA;oxidoreductase activity-IEA;flavin adenine dinucleotide binding-I		FAD linked oxidase, N-terminal	TRINITY_DN5005_c0_g1	FvH4_4g26570.1	17.629	87.0735	69.4445	4.93922	0.000875526	0.190887	amino-acid permease BAT1 isoform X1 \\ 0.00E+00 \\ 92.96 % \\ GO:0055085-IEA;GO:0016020-IEA;GO:0016021-IEA;GO:0022857-IEA;GO:0006865-IEA \\ transmembrane transport-IEA;membrane-IEA;integral component of membrane-IEA;transmembrane transporter activity-IEA;
TRINITY_DN393_c1_g2	FvH4_1g03960.1	5.5595	33.6103	28.0508	6.04555	1.81426e-07	0.00360102	potassium channel AKT1 \\ 0.00E+00 \\ 94.66 % \\ GO:0006813-IEA;GO:0016020-IEA;GO:0016021-IEA;GO:0034765-IEA;GO:0010107-IEA;GO:0042802-IEA;GO:0071805-IEA;GO:0055085-IEA;GO:0009651-IEA;GO:0090333-IEA;GO:0009414-IEA;GO:0005242-IEA;GO:0005267-IEA;GO:0048767-		Cyclic nucleotide-binding domain	TRINITY_DN13271_c0_g1	FvH4_7g27760.1	3.14625	15.453	12.3067	4.91156	0.00221687	0.312421	pectinesterase 2-like \\ 0.00E+00 \\ 89.35 % \\ GO:0004857-IEA;GO:0005618-IEA;GO:0043086-IEA;GO:0045330-IEA;GO:0016020-IEA;GO:0016021-IEA;GO:0071555-IEA;GO:0030599-IEA;GO:0030599-IBA;GO:0045490-IEA;GO:0016787-IEA;GO:0046910-IBA;GO:0005576-IEA;GO:0042545-I	pectinesterase [EC:3.1.1.11]	Pectinesterase, catalytic
TRINITY_DN3135_c1_g1	FvH4_3g39850.1	3.5755	21.5375	17.962	6.02363	0.0001702	0.0715326	WRKY transcription factor WRKY24-like isoform X1 \\ 0.00E+00 \\ 81.19 % \\ GO:0003677-IEA;GO:0003700-IEA;GO:0006355-IEA;GO:0043565-IEA;GO:0005634-IEA \\ DNA binding-IEA;DNA-binding transcription factor activity-IEA;regulation of transcription, DNA-templat	WRKY transcription factor 33	WRKY domain	TRINITY_DN7411_c0_g1	FvH4_7g24650.1	2.49	12.206	9.716	4.90201	0.000530916	0.149744	probable protein phosphatase 2C 25 \\ 0.00E+00 \\ 87.54 %	protein phosphatase 1L [EC:3.1.3.16]	PPM-type phosphatase, divalent cation binding
TRINITY_DN1848_c0_g3	FvH4_4g35100.1	2.187	13.1645	10.9775	6.01943	0.00614492	0.499227	IAA-amino acid hydrolase ILR1-like 1 \\ 0.00E+00 \\ 87.29 % \\ GO:0016787-IEA \\ hydrolase activity-IEA \\ GO:0016787 \\ hydrolase activity	IAA-amino acid hydrolase [EC:3.5.1.-]	Peptidase M20	TRINITY_DN1316_c0_g1	FvH4_1g12290.1	2.89675	14.1555	11.2587	4.88668	0.000439868	0.136978	---NA--- \\ 1.40E-126 \\ 61.29 % \\ GO:0016310-IEA;GO:0016301-IEA \\ phosphorylation-IEA;kinase activity-IEA
TRINITY_DN4436_c0_g2	FvH4_7g26560.1	0.648	3.8965	3.2485	6.01312	0.000117357	0.0577216	LRR receptor-like serine/threonine-protein kinase GSO1 isoform X2 \\ 0.00E+00 \\ 71.07 % \\ GO:0016020-IEA;GO:0016021-IEA \\ membrane-IEA;integral component of membrane-IEA \\ GO:0016020 \\ membrane		Leucine-rich repeat	TRINITY_DN260304_c0_g1	FvH4_6g35980.1	5.661	27.6497	21.9887	4.88425	1.0306e-05	0.0225174	RING-H2 finger protein ATL3 \\ 1.90E-165 \\ 78.94 % \\ GO:0016020-IEA;GO:0016021-IEA;GO:0016567-IBA;GO:0005886-IBA \\ membrane-IEA;integral component of membrane-IEA;protein ubiquitination-IBA;plasma membrane-IBA \\ GO:0005886;GO:0016021;GO:0016567 \\ pla		Zinc finger, RING-type
TRINITY_DN2991_c0_g1	FvH4_2g39630.1	9.77575	58.587	48.8112	5.9931	0.0168304	0.870127	DNA polymerase epsilon catalytic subunit A \\ 6.20E-13 \\ 73.21 %			TRINITY_DN1612_c1_g1	FvH4_3g05200.1	5.891	28.7188	22.8278	4.87502	0.00289963	0.359105	endoplasmic reticulum oxidoreductin-1-like \\ 0.00E+00 \\ 92.67 % \\ GO:0005789-IBA;GO:0003756-IEA;GO:0003756-IBA;GO:0016491-IEA;GO:0015035-IBA;GO:0016020-IEA;GO:0016021-IEA;GO:0016671-IEA;GO:0034975-IBA;GO:0055114-IEA;GO:0005783-IEA;GO:0016972-IEA \\ end	ERO1-like protein alpha [EC:1.8.4.-]	Endoplasmic reticulum oxidoreductin 1
TRINITY_DN4662_c0_g1	FvH4_5g34720.1	11.0035	65.5412	54.5377	5.9564	4.88591e-06	0.014903	PREDICTED: uncharacterized protein LOC101306370 \\ 4.10E-89 \\ 84.16 %			TRINITY_DN7515_c2_g3	FvH4_4g24790.1	2.08675	10.149	8.06225	4.86354	0.00989612	0.683718	vinorine synthase-like \\ 0.00E+00 \\ 83.38 % \\ GO:0016746-IEA;GO:0016747-IEA;GO:0016740-IEA;GO:0050636-IEA \\ transferase activity, transferring acyl groups-IEA;transferase activity, transferring acyl groups other than amino-acyl groups-IEA;transferase		Transferase
TRINITY_DN9976_c0_g1	FvH4_3g21340.1	1.9555	11.6305	9.675	5.94758	0.000842495	0.170236	calcium-binding protein PBP1-like		EF-hand domain	TRINITY_DN4662_c0_g1	FvH4_5g34720.1	13.49	65.5412	52.0512	4.85851	9.93111e-06	0.0221701	PREDICTED: uncharacterized protein LOC101306370 \\ 4.10E-89 \\ 84.16 %
TRINITY_DN26_c0_g1	FvH4_3g16070.1	1.846	10.9265	9.0805	5.91901	5.20157e-07	0.00569332	putative serine/threonine-protein kinase \\ 0.00E+00 \\ 91.33 % \\ GO:0000166-IEA;GO:0016310-IEA;GO:0004672-IEA;GO:0016740-IEA;GO:0016301-IEA;GO:0004674-IEA;GO:0005524-IEA;GO:0006468-IEA \\ nucleotide binding-IEA;phosphorylation-IEA;protein kinase activit		Protein kinase domain	TRINITY_DN262292_c0_g1	FvH4_2g04290.1	10.264	49.7572	39.4933	4.84774	0.000186261	0.0870736	probable beta-D-xylosidase 5 isoform X2 \\ 2.60E-05 \\ 98.34 %
TRINITY_DN2701_c1_g1	FvH4_6g11080.1	0.33925	2.00325	1.664	5.90494	0.000825432	0.168531	receptor-like protein 12 \\ 0.00E+00 \\ 81.50 % \\ GO:0016020-IEA;GO:0016021-IEA \\ membrane-IEA;integral component of membrane-IEA \\ GO:0016021 \\ integral component of membrane		Leucine-rich repeat	TRINITY_DN10644_c0_g1	FvH4_2g06010.1	0.44	2.12525	1.68525	4.83011	0.000608021	0.158486	abscisic acid 8'-hydroxylase 4 \\ 0.00E+00 \\ 89.24 % \\ GO:0010295-IEA;GO:0005506-IEA;GO:0046872-IEA;GO:0016705-IEA;GO:0016491-IEA;GO:0016020-IEA;GO:0016021-IEA;GO:0020037-IEA;GO:0055114-IEA;GO:0004497-IEA \\ (+)-abscisic acid 8'-hydroxylase activity-IEA	(+)-abscisic acid 8'-hydroxylase [EC:1.14.13.93]	Cytochrome P450
TRINITY_DN6775_c1_g1	FvH4_4g29210.1	3.5605	21.0023	17.4417	5.89868	7.19721e-07	0.00599255	hypothetical protein RchiOBHm_Chr4g0437271			TRINITY_DN350_c3_g1	FvH4_4g34370.1	4.566	21.987	17.421	4.81537	0.00244553	0.328849	DNA ligase 1 \\ 3.10E-102 \\ 81.07 % \\ GO:0016020-IEA;GO:0016021-IEA;GO:0016740-IEA \\ membrane-IEA;integral component of membrane-IEA;transferase activity-IEA \\ GO:0016021;GO:0016740 \\ integral component of membrane;transferase activity		Protein of unknown function DUF1645, plant
TRINITY_DN730_c1_g1	FvH4_1g24380.1	2.126	12.5258	10.3998	5.8917	0.00122551	0.209699	putative laccase \\ 0.00E+00 \\ 92.03 % \\ GO:0046274-IEA;GO:0048046-IEA;GO:0046872-IEA;GO:0016491-IEA;GO:0005507-IEA;GO:0055114-IEA;GO:0052716-IEA;GO:0005576-IEA \\ lignin catabolic process-IEA;apoplast-IEA;metal ion binding-IEA;oxidoreductase activity-I	laccase [EC:1.10.3.2]	Multicopper oxidase, type 1	TRINITY_DN9241_c0_g1	FvH4_2g36680.1	2.64375	12.7185	10.0747	4.81078	3.73074e-05	0.0404873	putative peptidyl-tRNA hydrolase PTRHD1 \\ 2.90E-110 \\ 85.44 % \\ GO:0004045-IEA;GO:0016787-IEA \\ aminoacyl-tRNA hydrolase activity-IEA;hydrolase activity-IEA \\ GO:0004045 \\ aminoacyl-tRNA hydrolase activity		Peptidyl-tRNA hydrolase, PTH2
TRINITY_DN10059_c0_g1	FvH4_6g35500.1	2.26075	13.3145	11.0537	5.88942	3.77747e-05	0.0312829	GDSL esterase/lipase 1-like		GDSL lipase/esterase	TRINITY_DN3179_c0_g1	FvH4_3g16430.1	2.254	10.8227	8.56875	4.80157	0.000967995	0.20068	MLO-like protein 1 \\ 0.00E+00 \\ 84.41 % \\ GO:0009607-IEA;GO:0005516-IEA;GO:0016020-IEA;GO:0016021-IEA;GO:0006952-IEA \\ response to biotic stimulus-IEA;calmodulin binding-IEA;membrane-IEA;integral component of membrane-IEA;defense response-IEA \\ GO:00	mlo protein	Mlo-related protein
TRINITY_DN9945_c0_g1	FvH4_2g16180.1	3.354	19.752	16.398	5.88909	4.26913e-05	0.0333805	NAC transcription factor \\ 1.10E-67 \\ 92.41 % \\ GO:0003677-IEA;GO:0045792-IEA;GO:0006355-IEA;GO:0010200-IEA;GO:0005634-IEA;GO:0009965-IEA;GO:0048281-IEA \\ DNA binding-IEA;negative regulation of cell size-IEA;regulation of transcription, DNA-templated-		NAC domain	TRINITY_DN4353_c0_g1	FvH4_3g10960.1	7.26675	34.8563	27.5895	4.79668	0.000104654	0.0646108	berberine bridge enzyme-like 21 \\ 0.00E+00 \\ 85.75 % \\ GO:0071949-IEA;GO:0016491-IEA;GO:0050660-IEA;GO:0003824-IEA;GO:0016020-IEA;GO:0016021-IEA;GO:0055114-IEA;GO:0050328-IEA \\ FAD binding-IEA;oxidoreductase activity-IEA;flavin adenine dinucleotide bi		FAD linked oxidase, N-terminal
TRINITY_DN537_c0_g1	FvH4_2g05100.1	0.594	3.48475	2.89075	5.86658	0.00230454	0.29693	---NA---			TRINITY_DN13574_c0_g1	FvH4_6g44790.1	2.2365	10.6718	8.43525	4.77163	0.00204271	0.2974	protein TIC 20-IV, chloroplastic-like \\ 0.00E+00 \\ 92.65 % \\ GO:0008152-IEA;GO:0004553-IEA;GO:0005975-IEA;GO:0016798-IEA;GO:0016787-IEA \\ metabolic process-IEA;hydrolase activity, hydrolyzing O-glycosyl compounds-IEA;carbohydrate metabolic process-IEA		Chloroplast protein import component Tic20
TRINITY_DN1350_c0_g1	FvH4_7g33510.1	0.64125	3.75875	3.1175	5.8616	0.00672918	0.524635	putative endopeptidase, NLPC/P60 domain, LRAT-like domain-containing protein \\ 0.00E+00 \\ 88.81 % \\ GO:0016192-IEA;GO:0006906-IBA;GO:0046872-IEA;GO:0016491-IEA;GO:0016020-IEA;GO:0016021-IEA;GO:0016021-IBA;GO:0048278-IBA;GO:0031201-IBA;GO:0012505-IBA;GO		LRAT-like domain	TRINITY_DN113_c4_g1	FvH4_7g26920.1	7.526	35.8897	28.3637	4.76877	2.20457e-05	0.0318432	ethylene-responsive transcription factor 2-like \\ 3.40E-170 \\ 64.54 % \\ GO:0003677-IEA;GO:0003700-IEA;GO:0006351-IEA;GO:0006355-IEA;GO:0005634-IEA \\ DNA binding-IEA;DNA-binding transcription factor activity-IEA;transcription, DNA-templated-IEA;regulat	EREBP-like factor	AP2/ERF domain
TRINITY_DN2481_c0_g1	FvH4_6g36520.1	65.2685	380.236	314.967	5.82571	0.000138958	0.0631675	beta-amyrin synthase-like \\ 0.00E+00 \\ 92.32 % \\ GO:0016866-IEA;GO:0016853-IEA \\ intramolecular transferase activity-IEA;isomerase activity-IEA \\ GO:0016866 \\ intramolecular transferase activity	beta-amyrin synthase [EC:5.4.99.39]	Terpene synthase, conserved site	TRINITY_DN23699_c0_g1	FvH4_3g03610.1	4.64975	22.1632	17.5135	4.76655	3.30272e-05	0.0381075	calcium-binding protein PBP1-like \\ 0.00E+00 \\ 93.16 % \\ GO:0003756-IEA;GO:0003756-IBA;GO:0045454-IEA;GO:0005783-IEA;GO:0005783-IBA;GO:0005623-IEA;GO:0016853-IEA;GO:0005788-IEA;GO:0034976-IBA;GO:0006457-IBA \\ protein disulfide isomerase activity-IEA;p		EF-hand domain
TRINITY_DN20434_c0_g1	FvH4_1g00150.1	2.27175	13.2305	10.9587	5.82392	0.000186505	0.0753628	uncharacterized protein LOC112190620 \\ 0.00E+00 \\ 85.03 % \\ GO:0016757-IEA;GO:0016758-IEA;GO:0016740-IEA \\ transferase activity, transferring glycosyl groups-IEA;transferase activity, transferring hexosyl groups-IEA;transferase activity-IEA \\ GO:0016			TRINITY_DN4492_c0_g1	FvH4_7g06000.1	0.513	2.43575	1.92275	4.74805	1.1592e-05	0.0236389	rust resistance kinase Lr10-like \\ 0.00E+00 \\ 71.80 % \\ GO:0016020-IEA;GO:0016021-IEA;GO:0016310-IEA;GO:0004672-IEA;GO:0016301-IEA;GO:0008889-IEA;GO:0005524-IEA;GO:0016787-IEA;GO:0006468-IEA \\ membrane-IEA;integral component of membrane-IEA;phosphoryl		Protein kinase domain
TRINITY_DN4349_c0_g1	FvH4_4g00250.1	180.694	1047.9	867.204	5.79931	0.000983781	0.185935	beta-amyrin 28-oxidase-like \\ 0.00E+00 \\ 91.86 % \\ GO:0005506-IEA;GO:0046872-IEA;GO:0016491-IEA;GO:0016705-IEA;GO:0016020-IEA;GO:0016021-IEA;GO:0020037-IEA;GO:0055114-IEA;GO:0004497-IEA \\ iron ion binding-IEA;metal ion binding-IEA;oxidoreductase activ	beta-amyrin 28-monooxygenase [EC:1.14.13.201]	Cytochrome P450	TRINITY_DN2985_c0_g1	FvH4_3g02740.1	1.1845	5.6025	4.418	4.72984	3.38119e-06	0.0148806	cysteine-rich receptor-like protein kinase 25 \\ 0.00E+00 \\ 87.68 % \\ GO:0016020-IEA;GO:0016021-IEA;GO:0004672-IEA;GO:0016740-IEA;GO:0005524-IEA;GO:0006468-IEA \\ membrane-IEA;integral component of membrane-IEA;protein kinase activity-IEA;transferase ac		Protein kinase domain
TRINITY_DN15033_c0_g1	FvH4_6g20390.1	0.1735	1.005	0.8315	5.79251	0.000981029	0.185756	E3 ubiquitin-protein ligase PUB24-like \\ 0.00E+00 \\ 82.52 % \\ GO:0003860-IEA;GO:0016787-IEA \\ 3-hydroxyisobutyryl-CoA hydrolase activity-IEA;hydrolase activity-IEA \\ GO:0003860 \\ 3-hydroxyisobutyryl-CoA hydrolase activity		U box domain	TRINITY_DN9635_c0_g2	FvH4_6g34970.1	4.5505	21.4503	16.8998	4.71382	0.000120105	0.0696836	linoleate 13S-lipoxygenase 3-1, chloroplastic-like \\ 0.00E+00 \\ 93.14 % \\ GO:0031408-IEA;GO:0016702-IEA;GO:0051213-IEA;GO:0046872-IEA;GO:0016491-IEA;GO:0055114-IEA;GO:0006633-IEA \\ oxylipin biosynthetic process-IEA;oxidoreductase activity, acting on s	lipoxygenase [EC:1.13.11.12]	Lipoxygenase
TRINITY_DN1612_c1_g1	FvH4_3g05200.1	4.98275	28.7188	23.736	5.76363	0.00219959	0.289214	endoplasmic reticulum oxidoreductin-1-like \\ 0.00E+00 \\ 92.67 % \\ GO:0005789-IBA;GO:0003756-IEA;GO:0003756-IBA;GO:0016491-IEA;GO:0015035-IBA;GO:0016020-IEA;GO:0016021-IEA;GO:0016671-IEA;GO:0034975-IBA;GO:0055114-IEA;GO:0005783-IEA;GO:0016972-IEA \\ end	ERO1-like protein alpha [EC:1.8.4.-]	Endoplasmic reticulum oxidoreductin 1	TRINITY_DN4349_c0_g1	FvH4_4g00250.1	222.342	1047.9	825.556	4.713	0.0013017	0.235613	beta-amyrin 28-oxidase-like \\ 0.00E+00 \\ 91.86 % \\ GO:0005506-IEA;GO:0046872-IEA;GO:0016491-IEA;GO:0016705-IEA;GO:0016020-IEA;GO:0016021-IEA;GO:0020037-IEA;GO:0055114-IEA;GO:0004497-IEA \\ iron ion binding-IEA;metal ion binding-IEA;oxidoreductase activ	beta-amyrin 28-monooxygenase [EC:1.14.13.201]	Cytochrome P450
TRINITY_DN11416_c0_g1	FvH4_6g20400.1	0.68075	3.9145	3.23375	5.75028	0.000187225	0.0754154	E3 ubiquitin-protein ligase PUB23-like \\ 7.70E-146 \\ 78.78 % \\ GO:0009733-IEA \\ response to auxin-IEA \\ GO:0009733 \\ response to auxin		U box domain	TRINITY_DN329_c0_g2	FvH4_6g20840.1	0.86475	4.07075	3.206	4.70743	8.06874e-06	0.0198859	calcium-dependent protein kinase 26-like \\ 0.00E+00 \\ 86.17 % \\ GO:0005509-IEA;GO:0016310-IEA;GO:0004672-IEA;GO:0016740-IEA;GO:0004683-IEA;GO:0016301-IEA;GO:0005524-IEA;GO:0006468-IEA \\ calcium ion binding-IEA;phosphorylation-IEA;protein kinase activi	calcium-dependent protein kinase [EC:2.7.11.1]	Protein kinase domain
TRINITY_DN17752_c0_g1	FvH4_3g19740.1	0.47725	2.74275	2.2655	5.74699	0.000570283	0.141491	lactoylglutathione lyase GLX1-like \\ 1.40E-11 \\ 52.89 %	lactoylglutathione lyase [EC:4.4.1.5]	Glyoxalase/fosfomycin resistance/dioxygenase domain	TRINITY_DN6891_c0_g3	FvH4_1g02250.1	1.32425	6.22375	4.8995	4.69983	5.64253e-08	0.00217287	putative Late embryogenesis abundant protein, LEA-14 \\ 2.70E-87 \\ 68.82 % \\ GO:0045892-IEA \\ negative regulation of transcription, DNA-templated-IEA \\ GO:0045892 \\ negative regulation of transcription, DNA-templated		Late embryogenesis abundant protein, LEA-14
TRINITY_DN4492_c0_g1	FvH4_7g06000.1	0.424	2.43575	2.01175	5.74469	2.54701e-06	0.00997053	rust resistance kinase Lr10-like \\ 0.00E+00 \\ 71.80 % \\ GO:0016020-IEA;GO:0016021-IEA;GO:0016310-IEA;GO:0004672-IEA;GO:0016301-IEA;GO:0008889-IEA;GO:0005524-IEA;GO:0016787-IEA;GO:0006468-IEA \\ membrane-IEA;integral component of membrane-IEA;phosphoryl		Protein kinase domain	TRINITY_DN3195_c0_g1	FvH4_5g03710.1	85.0375	398.534	313.496	4.68656	0.001406	0.245834	disease resistance response protein 206-like		Dirigent protein
TRINITY_DN3142_c0_g3	FvH4_4g09410.1	0.6195	3.5465	2.927	5.72478	7.88462e-05	0.0471883	hydroxyproline O-galactosyltransferase GALT3 \\ 0.00E+00 \\ 91.25 % \\ GO:0016757-IEA;GO:0016020-IEA;GO:0016021-IEA;GO:0008378-IEA;GO:0000139-IEA;GO:0005783-IBA;GO:0006486-IEA;GO:0006486-IBA;GO:0016740-IEA;GO:0005794-IEA;GO:0005794-IBA \\ transferase acti		Glycosyl transferase, family 31	TRINITY_DN16218_c0_g1	FvH4_4g26600.1	3.2195	15.0882	11.8687	4.68652	1.52611e-05	0.0281526	uncharacterized N-acetyltransferase p20-like \\ 0.00E+00 \\ 96.56 % \\ GO:0009097-IEA;GO:0046872-IEA;GO:0005739-IEA;GO:0016491-IEA;GO:0009099-IEA;GO:0055114-IEA;GO:0008652-IEA;GO:0004455-IEA;GO:0009082-IEA;GO:0016853-IEA \\ isoleucine biosynthetic process		GNAT domain
TRINITY_DN90_c0_g2	FvH4_6g44460.1	28.6535	162.911	134.258	5.68557	0.000742492	0.159751	PREDICTED: uncharacterized protein LOC101304894 \\ 7.40E-50 \\ 91.59 %		Protein of unknown function wound-induced	TRINITY_DN3146_c0_g1	FvH4_5g01270.1	1.784	8.344	6.56	4.67713	2.29279e-06	0.0130281	phospholipase D beta 1-like \\ 0.00E+00 \\ 83.88 % \\ GO:0046470-IEA;GO:0003824-IEA;GO:0016020-IEA;GO:0016042-IEA;GO:0005509-IEA;GO:0004630-IEA;GO:0016787-IEA;GO:0070290-IEA \\ phosphatidylcholine metabolic process-IEA;catalytic activity-IEA;membrane-IEA;	phospholipase D1/2 [EC:3.1.4.4]	C2 domain
TRINITY_DN10563_c1_g2	FvH4_5g16890.1	6.294	35.6992	29.4052	5.67195	1.64407e-07	0.00360102	protein DETOXIFICATION 16-like \\ 0.00E+00 \\ 85.87 % \\ GO:0055085-IEA;GO:0009507-IEA;GO:0016020-IEA;GO:0015297-IEA;GO:0016021-IEA;GO:0006855-IEA;GO:0015238-IEA;GO:0009536-IEA \\ transmembrane transport-IEA;chloroplast-IEA;membrane-IEA;antiporter activit		Multi antimicrobial extrusion protein	TRINITY_DN8939_c0_g1	FvH4_4g21600.1	2.18775	10.2197	8.032	4.67135	2.10911e-06	0.0130281	ABC transporter B family member 11-like \\ 0.00E+00 \\ 85.37 % \\ GO:0042626-IEA;GO:0000166-IEA;GO:0055085-IEA;GO:0016020-IEA;GO:0016021-IEA;GO:0042908-IEA;GO:0008559-IEA;GO:0006855-IEA;GO:0005524-IEA;GO:0016787-IEA;GO:0016887-IEA \\ ATPase activity, coup	ATP-binding cassette, subfamily B (MDR/TAP), member 1 [EC:3.6.3.44]	ABC transporter-like
TRINITY_DN28769_c0_g3	FvH4_6g23840.1	0.17825	1.00875	0.8305	5.65919	0.000539614	0.136935	rust resistance kinase Lr10-like \\ 0.00E+00 \\ 75.77 % \\ GO:0016020-IEA;GO:0016021-IEA;GO:0016310-IEA;GO:0004672-IEA;GO:0016301-IEA;GO:0008889-IEA;GO:0005524-IEA;GO:0016787-IEA;GO:0006468-IEA \\ membrane-IEA;integral component of membrane-IEA;phosphoryl		Protein kinase domain	TRINITY_DN401_c0_g3	FvH4_6g53000.1	1.01425	4.7025	3.68825	4.63643	0.000832248	0.184986	beta-glucosidase 13-like \\ 0.00E+00 \\ 75.76 % \\ GO:0008152-IEA;GO:0008422-IEA;GO:0102483-IEA;GO:0004553-IEA;GO:0016787-IEA;GO:0005975-IEA;GO:0016798-IEA \\ metabolic process-IEA;beta-glucosidase activity-IEA;scopolin beta-glucosidase activity-IEA;hydro	beta-glucosidase [EC:3.2.1.21]	Glycoside hydrolase family 1
TRINITY_DN3678_c0_g1	FvH4_1g16790.1	3.66775	20.7025	17.0348	5.64447	0.00041263	0.118031	cinnamyl alcohol dehydrogenase 1-like \\ 0.00E+00 \\ 88.48 % \\ GO:0008270-IEA;GO:0016491-IEA;GO:0046872-IEA;GO:0045551-IEA;GO:0055114-IEA;GO:0052747-IEA \\ zinc ion binding-IEA;oxidoreductase activity-IEA;metal ion binding-IEA;cinnamyl-alcohol dehydrogen	cinnamyl-alcohol dehydrogenase [EC:1.1.1.195]	Alcohol dehydrogenase, zinc-type, conserved site	TRINITY_DN10987_c1_g1	FvH4_6g38620.1	2.338	10.8245	8.4865	4.62981	1.18681e-05	0.0237417	aspartyl protease family protein 2-like \\ 0.00E+00 \\ 86.61 % \\ GO:0004190-IEA;GO:0003735-IEA;GO:0008233-IEA;GO:0006508-IEA;GO:0005840-IEA;GO:0016787-IEA;GO:0006412-IEA \\ aspartic-type endopeptidase activity-IEA;structural constituent of ribosome-IEA;p		Aspartic peptidase A1 family
TRINITY_DN695_c0_g2	FvH4_6g37200.1	19.521	109.294	89.773	5.59879	0.000197329	0.0779375	glucan endo-1,3-beta-glucosidase, basic isoform-like \\ 2.80E-06 \\ 81.65 %		Glycoside hydrolase family 17	TRINITY_DN1081_c0_g1	FvH4_3g26010.1	52.1687	241.09	188.922	4.62135	0.00481902	0.465549	pathogenesis-related protein PR-4-like \\ 0.00E+00 \\ 90.45 % \\ GO:0051213-IEA;GO:0051213-IBA;GO:0016491-IEA;GO:0046872-IEA;GO:0055114-IEA \\ dioxygenase activity-IEA;dioxygenase activity-IBA;oxidoreductase activity-IEA;metal ion binding-IEA;oxidation-re		Barwin domain
TRINITY_DN9141_c0_g1	FvH4_3g12970.1	0.798	4.4605	3.6625	5.5896	0.00111759	0.19941	anthocyanidin 3-O-glucosyltransferase 2-like		UDP-glucuronosyl/UDP-glucosyltransferase	TRINITY_DN6189_c1_g2	FvH4_5g19840.1	22.9168	105.834	82.9172	4.61819	0.00128774	0.234603	ethylene-responsive transcription factor 2 \\ 4.50E-106 \\ 71.65 %	EREBP-like factor	AP2/ERF domain
TRINITY_DN3317_c0_g2	FvH4_3g42290.1	19.637	109.147	89.5098	5.55822	6.04729e-07	0.00580423	farnesyl pyrophosphate synthase \\ 2.40E-123 \\ 94.59 % \\ GO:0004337-IEA;GO:0008299-IEA;GO:0004161-IEA;GO:0016740-IEA \\ geranyltranstransferase activity-IEA;isoprenoid biosynthetic process-IEA;dimethylallyltranstransferase activity-IEA;transferase activ	farnesyl diphosphate synthase [EC:2.5.1.1 2.5.1.10]	Polyprenyl synthetase	TRINITY_DN12500_c1_g1	FvH4_1g23380.1	0.3625	1.6735	1.311	4.61655	2.78961e-06	0.0132215	G-type lectin S-receptor-like serine/threonine-protein kinase LECRK3 \\ 0.00E+00 \\ 81.96 % \\ GO:0000166-IEA;GO:0048544-IEA;GO:0016020-IEA;GO:0016021-IEA;GO:0016310-IEA;GO:0004672-IEA;GO:0016740-IEA;GO:0016301-IEA;GO:0004674-IEA;GO:0030246-IEA;GO:0005524		Protein kinase domain
TRINITY_DN7203_c0_g1	FvH4_4g36510.1	1.45475	8.0725	6.61775	5.54906	0.000894948	0.17617	gibberellin 2-beta-dioxygenase 8-like \\ 0.00E+00 \\ 82.30 % \\ GO:0051213-IEA;GO:0016491-IEA;GO:0046872-IEA;GO:0055114-IEA;GO:0045543-IEA \\ dioxygenase activity-IEA;oxidoreductase activity-IEA;metal ion binding-IEA;oxidation-reduction process-IEA;gibber	gibberellin 2-oxidase [EC:1.14.11.13]	Oxoglutarate/iron-dependent dioxygenase	TRINITY_DN2782_c0_g2	FvH4_2g38320.1	2.2625	10.4435	8.181	4.61591	0.010918	0.718548	thaumatin-like protein 1b \\ 2.70E-156 \\ 92.37 %		Thaumatin
TRINITY_DN8939_c0_g1	FvH4_4g21600.1	1.8475	10.2197	8.37225	5.53166	1.60854e-06	0.00839904	ABC transporter B family member 11-like \\ 0.00E+00 \\ 85.37 % \\ GO:0042626-IEA;GO:0000166-IEA;GO:0055085-IEA;GO:0016020-IEA;GO:0016021-IEA;GO:0042908-IEA;GO:0008559-IEA;GO:0006855-IEA;GO:0005524-IEA;GO:0016787-IEA;GO:0016887-IEA \\ ATPase activity, coup	ATP-binding cassette, subfamily B (MDR/TAP), member 1 [EC:3.6.3.44]	ABC transporter-like	TRINITY_DN1222_c0_g1	FvH4_4g19740.1	103.836	478.66	374.824	4.60977	0.000965501	0.200298	ATP-citrate synthase beta chain protein 2 \\ 0.00E+00 \\ 98.38 % \\ GO:0016746-IEA;GO:0003878-IEA;GO:0003824-IEA;GO:0016740-IEA;GO:0046912-IEA \\ transferase activity, transferring acyl groups-IEA;ATP citrate synthase activity-IEA;catalytic activity-IEA;t	ATP citrate (pro-S)-lyase [EC:2.3.3.8]	Citrate synthase
TRINITY_DN7017_c0_g1	FvH4_3g05370.1	1.4345	7.9055	6.471	5.51098	0.0133648	0.770868	protein TIFY 5A-like \\ 0.00E+00 \\ 68.50 % \\ GO:0003677-IEA;GO:0044212-IBA;GO:0030154-IBA;GO:0043565-IBA;GO:0005634-IBA \\ DNA binding-IEA;transcription regulatory region DNA binding-IBA;cell differentiation-IBA;sequence-specific DNA binding-IBA;nucleus		Tify domain	TRINITY_DN10944_c0_g1	FvH4_4g22330.1	1.0945	5.04325	3.94875	4.60781	3.8254e-05	0.0409198	nudix hydrolase 12, mitochondrial-like isoform X1 \\ 2.40E-73 \\ 83.45 % \\ GO:0016787-IEA \\ hydrolase activity-IEA \\ GO:0016787 \\ hydrolase activity	diphosphoinositol-polyphosphate diphosphatase [EC:3.6.1.52]	NUDIX hydrolase domain
TRINITY_DN16218_c0_g1	FvH4_4g26600.1	2.7455	15.0882	12.3427	5.49563	7.03022e-06	0.0167026	uncharacterized N-acetyltransferase p20-like \\ 0.00E+00 \\ 96.56 % \\ GO:0009097-IEA;GO:0046872-IEA;GO:0005739-IEA;GO:0016491-IEA;GO:0009099-IEA;GO:0055114-IEA;GO:0008652-IEA;GO:0004455-IEA;GO:0009082-IEA;GO:0016853-IEA \\ isoleucine biosynthetic process		GNAT domain	TRINITY_DN8506_c0_g1	FvH4_7g26400.1	6.0005	27.6372	21.6367	4.60582	0.00127753	0.233899	putative bifunctional inhibitor/plant lipid transfer protein/seed storage helical \\ 1.20E-13 \\ 78.01 % \\ GO:0005506-IEA;GO:0009507-IEA;GO:0016491-IEA;GO:0046872-IEA;GO:0016020-IEA;GO:0016021-IEA;GO:0055114-IEA;GO:0015979-IEA;GO:0022904-IEA;GO:0009055-I
TRINITY_DN4982_c0_g1	FvH4_4g26240.1	1.31625	7.23175	5.9155	5.49421	0.00157702	0.24362	epoxide hydrolase 4-like		Alpha/beta hydrolase fold-1	TRINITY_DN3678_c0_g1	FvH4_1g16790.1	4.5095	20.7025	16.193	4.59086	0.0005174	0.148137	cinnamyl alcohol dehydrogenase 1-like \\ 0.00E+00 \\ 88.48 % \\ GO:0008270-IEA;GO:0016491-IEA;GO:0046872-IEA;GO:0045551-IEA;GO:0055114-IEA;GO:0052747-IEA \\ zinc ion binding-IEA;oxidoreductase activity-IEA;metal ion binding-IEA;cinnamyl-alcohol dehydrogen	cinnamyl-alcohol dehydrogenase [EC:1.1.1.195]	Alcohol dehydrogenase, zinc-type, conserved site
TRINITY_DN12500_c1_g1	FvH4_1g23380.1	0.3055	1.6735	1.368	5.47791	3.50645e-07	0.00469667	G-type lectin S-receptor-like serine/threonine-protein kinase LECRK3 \\ 0.00E+00 \\ 81.96 % \\ GO:0000166-IEA;GO:0048544-IEA;GO:0016020-IEA;GO:0016021-IEA;GO:0016310-IEA;GO:0004672-IEA;GO:0016740-IEA;GO:0016301-IEA;GO:0004674-IEA;GO:0030246-IEA;GO:0005524		Protein kinase domain	TRINITY_DN2200_c0_g3	FvH4_2g34780.1	19.479	89.3525	69.8735	4.58712	0.000514862	0.147733	patatin-like protein 2 \\ 0.00E+00 \\ 90.07 % \\ GO:0006629-IEA;GO:0016042-IEA;GO:0016787-IEA \\ lipid metabolic process-IEA;lipid catabolic process-IEA;hydrolase activity-IEA \\ GO:0016042;GO:0016787 \\ lipid catabolic process;hydrolase activity		Patatin-like phospholipase domain
TRINITY_DN12216_c0_g1	FvH4_5g36230.1	3.45325	18.916	15.4627	5.47774	0.00180028	0.261268	RING-H2 finger protein ATL11-like \\ 0.00E+00 \\ 68.55 % \\ GO:0016020-IEA;GO:0016021-IEA \\ membrane-IEA;integral component of membrane-IEA \\ GO:0016021 \\ integral component of membrane	E3 ubiquitin-protein ligase ATL6/9/15/31/42/55 [EC:2.3.2.27]	Zinc finger, RING-type	TRINITY_DN11663_c0_g1	FvH4_7g30050.1	2.95325	13.54	10.5867	4.58478	0.000904666	0.193946	protein DETOXIFICATION 35 \\ 0.00E+00 \\ 87.18 % \\ GO:0055085-IEA;GO:0016020-IEA;GO:0015297-IEA;GO:0016021-IEA;GO:0006855-IEA;GO:0015238-IEA \\ transmembrane transport-IEA;membrane-IEA;antiporter activity-IEA;integral component of membrane-IEA;drug trans		Multi antimicrobial extrusion protein
TRINITY_DN8970_c0_g1	FvH4_5g05910.1	0.3595	1.96425	1.60475	5.46384	0.000339776	0.105097	hypothetical protein RchiOBHm_Chr7g0192821 \\ 0.00E+00 \\ 87.57 % \\ GO:0048046-IEA;GO:0005618-IEA;GO:0071555-IEA;GO:0016740-IEA;GO:0016762-IEA;GO:0016798-IEA;GO:0016787-IEA;GO:0010411-IEA;GO:0008152-IEA;GO:0016757-IEA;GO:0006073-IEA;GO:0009831-IEA;GO:000			TRINITY_DN169730_c0_g1	FvH4_7g29880.1	0.8485	3.8695	3.021	4.5604	0.000144126	0.0760287	Transmembrane protein \\ 1.50E-102 \\ 81.41 % \\ GO:0003700-IEA;GO:0006355-IEA;GO:0005634-IEA;GO:0003676-IEA \\ DNA-binding transcription factor activity-IEA;regulation of transcription, DNA-templated-IEA;nucleus-IEA;nucleic acid binding-IEA \\ GO:0003676
TRINITY_DN11031_c0_g1	FvH4_1g07430.1	0.205	1.113	0.908	5.42927	0.00328039	0.355865	Protein SON like \\ 8.10E-140 \\ 67.93 %			TRINITY_DN3467_c0_g1	FvH4_3g04160.1	1.76625	8.0515	6.28525	4.55853	0.00142749	0.247629	CFE protein \\ 8.80E-122 \\ 76.45 % \\ GO:0016020-IEA;GO:0016021-IEA \\ membrane-IEA;integral component of membrane-IEA \\ GO:0016021 \\ integral component of membrane		Protein of unknown function DUF761, plant
TRINITY_DN9044_c0_g1	FvH4_2g34940.1	3.80275	20.573	16.7703	5.41003	2.26591e-05	0.0234248	Trafficking kinesin-binding protein like \\ 0.00E+00 \\ 81.35 % \\ GO:0005634-IEA \\ nucleus-IEA \\ GO:0005634 \\ nucleus		Protein of unknown function DUF1645, plant	TRINITY_DN9976_c0_g1	FvH4_3g21340.1	2.55175	11.6305	9.07875	4.55785	0.00121017	0.228022	calcium-binding protein PBP1-like		EF-hand domain
TRINITY_DN9789_c0_g1	FvH4_4g04780.1	4.856	26.184	21.328	5.39209	0.0337229	1	---NA---			TRINITY_DN19856_c0_g1	FvH4_5g10980.1	6.19	28.1677	21.9777	4.55053	0.00843725	0.623175	NADP-specific glutamate dehydrogenase, putative \\ 1.50E-16 \\ 92.30 % \\ GO:0016020-IEA;GO:0016021-IEA \\ membrane-IEA;integral component of membrane-IEA \\ GO:0016021 \\ integral component of membrane
TRINITY_DN4353_c0_g1	FvH4_3g10960.1	6.46975	34.8563	28.3865	5.38757	8.21525e-05	0.0480324	berberine bridge enzyme-like 21 \\ 0.00E+00 \\ 85.75 % \\ GO:0071949-IEA;GO:0016491-IEA;GO:0050660-IEA;GO:0003824-IEA;GO:0016020-IEA;GO:0016021-IEA;GO:0055114-IEA;GO:0050328-IEA \\ FAD binding-IEA;oxidoreductase activity-IEA;flavin adenine dinucleotide bi		FAD linked oxidase, N-terminal	TRINITY_DN2695_c1_g5	FvH4_6g26360.1	1.46575	6.62825	5.1625	4.52209	0.00201648	0.295536	transcription factor bHLH162-like \\ 2.40E-98 \\ 92.10 % \\ GO:0045893-IBA;GO:0005634-IBA \\ positive regulation of transcription, DNA-templated-IBA;nucleus-IBA \\ GO:0005634;GO:0045893 \\ nucleus;positive regulation of transcription, DNA-templated		Myc-type, basic helix-loop-helix (bHLH) domain
TRINITY_DN5614_c0_g1	FvH4_7g24390.1	1.96025	10.5377	8.5775	5.37572	6.49979e-08	0.00286056	putative MENTAL domain-containing protein \\ 2.70E-99 \\ 87.74 % \\ GO:0016020-IEA;GO:0016021-IEA \\ membrane-IEA;integral component of membrane-IEA \\ GO:0016021 \\ integral component of membrane		MENTAL domain	TRINITY_DN7877_c1_g1	FvH4_2g05950.1	3.09	13.9298	10.8398	4.50801	5.14035e-06	0.0174224	putative leucine-rich repeat-containing, plant-type, leucine-rich repeat domain, L \\ 0.00E+00 \\ 74.80 % \\ GO:0016020-IEA;GO:0016021-IEA \\ membrane-IEA;integral component of membrane-IEA \\ GO:0016021 \\ integral component of membrane		Leucine-rich repeat
TRINITY_DN6519_c0_g1	FvH4_7g03030.1	0.19875	1.06675	0.868	5.3673	0.00208936	0.283118	protein NRT1/ PTR FAMILY 5.4-like \\ 3.20E-140 \\ 65.27 % \\ GO:0016020-IEA;GO:0016021-IEA \\ membrane-IEA;integral component of membrane-IEA		Proton-dependent oligopeptide transporter family	TRINITY_DN8338_c0_g1	FvH4_1g24040.1	0.672	3.0245	2.3525	4.50074	0.00430499	0.442671	protein MKS1-like \\ 3.70E-126 \\ 63.14 %		VQ
TRINITY_DN6335_c2_g1	FvH4_3g20550.1	2.8865	15.4877	12.6012	5.36558	0.000254703	0.0903991	CBS domain-containing protein CBSX5-like \\ 0.00E+00 \\ 68.24 %		CBS domain	TRINITY_DN12548_c1_g1	FvH4_6g39330.1	0.62	2.7855	2.1655	4.49274	0.0102397	0.697153	putative UDP-glucose flavonoid 3-O-glucosyltransferase 3 \\ 4.70E-14 \\ 80.78 % \\ GO:0046907-IBA;GO:0016020-IEA;GO:0016021-IEA;GO:0009306-IBA;GO:0005622-IEA \\ intracellular transport-IBA;membrane-IEA;integral component of membrane-IEA;protein secretion-		UDP-glucuronosyl/UDP-glucosyltransferase
TRINITY_DN8165_c0_g1	FvH4_7g26430.1	129.969	696.219	566.25	5.35681	3.06766e-05	0.0273929	putative bifunctional inhibitor/plant lipid transfer protein/seed storage helical			TRINITY_DN16703_c0_g1	FvH4_6g28280.1	0.755	3.37725	2.62225	4.47318	0.00565311	0.507818	organic cation/carnitine transporter 4 \\ 0.00E+00 \\ 87.43 % \\ GO:0055085-IEA;GO:0016020-IEA;GO:0016021-IEA;GO:0008643-IEA;GO:0022857-IEA;GO:0005215-IEA \\ transmembrane transport-IEA;membrane-IEA;integral component of membrane-IEA;carbohydrate transpor		Major facilitator, sugar transporter-like
TRINITY_DN13341_c0_g1	FvH4_6g29800.1	1.08725	5.819	4.73175	5.35203	0.00125403	0.212269	cucumber peeling cupredoxin-like		Phytocyanin domain	TRINITY_DN78139_c0_g1	FvH4_3g15110.1	0.24375	1.0885	0.84475	4.46564	0.00550602	0.499776	kinase RLK-Pelle-DLSV family \\ 0.00E+00 \\ 84.74 % \\ GO:0000166-IEA;GO:0004714-IEA;GO:0016020-IEA;GO:0016021-IEA;GO:0016310-IEA;GO:0004672-IEA;GO:0016740-IEA;GO:0016301-IEA;GO:0004674-IEA;GO:0005524-IEA;GO:0018108-IEA;GO:0006468-IEA \\ nucleotide bindin		Protein kinase domain
TRINITY_DN3176_c0_g1	FvH4_5g00090.1	12.2372	65.4805	53.2433	5.35092	0.0009332	0.180844	L-lactate dehydrogenase A-like \\ 2.70E-135 \\ 87.85 % \\ GO:0004459-IEA;GO:0005737-IEA;GO:0016616-IEA;GO:0016491-IEA;GO:0003824-IEA;GO:0019752-IEA;GO:0055114-IEA;GO:0005975-IEA \\ L-lactate dehydrogenase activity-IEA;cytoplasm-IEA;oxidoreductase activity	L-lactate dehydrogenase [EC:1.1.1.27]	Lactate/malate dehydrogenase, N-terminal	TRINITY_DN7010_c1_g1	FvH4_3g44150.1	0.6465	2.878	2.2315	4.45166	0.00777426	0.597857	non-structural maintenance of chromosomes element 4 homolog A-like		Non-structural maintenance of chromosome element 4, C-terminal
TRINITY_DN695_c0_g1	FvH4_6g24640.1	15.0562	80.4952	65.439	5.3463	1.11788e-06	0.00717468	glucan endo-1,3-beta-glucosidase, basic isoform-like \\ 8.30E-179 \\ 72.02 % \\ GO:0008270-IEA;GO:0003676-IEA \\ zinc ion binding-IEA;nucleic acid binding-IEA		Glycoside hydrolase family 17	TRINITY_DN6035_c0_g1	FvH4_2g22110.1	0.631	2.806	2.175	4.44691	0.0016932	0.270833	---NA--- \\ 5.30E-45 \\ 74.85 % \\ GO:0003735-IEA;GO:0005840-IEA;GO:0006412-IEA;GO:0005622-IEA \\ structural constituent of ribosome-IEA;ribosome-IEA;translation-IEA;intracellular-IEA \\ GO:0005622 \\ intracellular
TRINITY_DN6432_c1_g1	FvH4_4g33230.1	2.3345	12.4743	10.1398	5.34344	0.000724707	0.157919	G-type lectin S-receptor-like serine/threonine-protein kinase At1g34300 \\ 0.00E+00 \\ 82.10 % \\ GO:0000166-IEA;GO:0048544-IEA;GO:0016020-IEA;GO:0016021-IEA;GO:0016310-IEA;GO:0016740-IEA;GO:0004672-IEA;GO:0016301-IEA;GO:0004674-IEA;GO:0030246-IEA;GO:0005		Protein kinase domain	TRINITY_DN8837_c0_g1	FvH4_7g24150.1	5.9375	26.3768	20.4393	4.4424	0.0132496	0.800043	nematode resistance protein-like HSPRO2 \\ 0.00E+00 \\ 82.33 % \\ GO:0055085-IEA;GO:0016020-IEA;GO:0016021-IEA;GO:0016310-IEA;GO:0016301-IEA \\ transmembrane transport-IEA;membrane-IEA;integral component of membrane-IEA;phosphorylation-IEA;kinase activity		Hs1pro-1, C-terminal
TRINITY_DN14564_c0_g1	FvH4_4g15150.1	9.123	48.3678	39.2448	5.30174	0.00467773	0.432314	sugar transport protein 13-like \\ 0.00E+00 \\ 93.79 % \\ GO:0055085-IEA;GO:0016020-IEA;GO:0016021-IEA;GO:0008643-IEA;GO:0022857-IEA;GO:0005215-IEA \\ transmembrane transport-IEA;membrane-IEA;integral component of membrane-IEA;carbohydrate transport-IEA;t		Sugar/inositol transporter	TRINITY_DN15814_c0_g1	FvH4_5g03420.1	14.5968	64.6983	50.1015	4.43237	2.47194e-06	0.0130281	putative Late embryogenesis abundant protein, LEA-14 \\ 1.40E-51 \\ 61.74 %		Late embryogenesis abundant protein, LEA-14
TRINITY_DN5919_c0_g2	FvH4_7g15490.1	5.776	30.6205	24.8445	5.30133	0.00244198	0.306583	late embryogenesis abundant protein At1g64065-like \\ 2.90E-115 \\ 88.76 % \\ GO:0016020-IEA;GO:0016021-IEA \\ membrane-IEA;integral component of membrane-IEA \\ GO:0016021 \\ integral component of membrane		Late embryogenesis abundant protein, LEA-14	TRINITY_DN4785_c0_g1	FvH4_5g18190.1	0.368	1.629	1.261	4.42663	0.00301633	0.364694	Nucleotide-diphospho-sugar transferase \\ 0.00E+00 \\ 77.74 % \\ GO:0003677-IEA;GO:0008270-IEA;GO:0004803-IEA;GO:0016020-IEA;GO:0016021-IEA;GO:0016740-IEA;GO:0006313-IEA \\ DNA binding-IEA;zinc ion binding-IEA;transposase activity-IEA;membrane-IEA;integra		Nucleotide-diphospho-sugar transferase
TRINITY_DN2714_c0_g1	FvH4_4g33890.1	22.5455	119.35	96.8047	5.29375	0.000467262	0.126493	protein PLANT CADMIUM RESISTANCE 2-like \\ 1.60E-18 \\ 54.55 %		PLAC8 motif-containing protein	TRINITY_DN9044_c0_g1	FvH4_2g34940.1	4.66875	20.573	15.9043	4.40653	3.24113e-05	0.0378217	Trafficking kinesin-binding protein like \\ 0.00E+00 \\ 81.35 % \\ GO:0005634-IEA \\ nucleus-IEA \\ GO:0005634 \\ nucleus		Protein of unknown function DUF1645, plant
TRINITY_DN6005_c0_g2	FvH4_1g10380.1	0.2125	1.116	0.9035	5.25176	2.72308e-05	0.0258537	ankyrin repeat-containing protein At5g02620-like \\ 0.00E+00 \\ 66.05 % \\ GO:2000031-IEA;GO:0016020-IEA;GO:0016021-IEA;GO:0071446-IEA;GO:0031347-IEA \\ regulation of salicylic acid mediated signaling pathway-IEA;membrane-IEA;integral component of membran		Ankyrin repeat	TRINITY_DN11088_c1_g1	FvH4_6g20500.1	4.28475	18.7338	14.449	4.37219	0.00673533	0.55805	hypothetical protein RchiOBHm_Chr3g0476381 \\ 5.20E-160 \\ 66.29 % \\ GO:0003677-IEA;GO:0003700-IEA;GO:0006355-IEA;GO:0043565-IEA;GO:0005634-IEA \\ DNA binding-IEA;DNA-binding transcription factor activity-IEA;regulation of transcription, DNA-templated-IE
TRINITY_DN2985_c0_g1	FvH4_3g02740.1	1.0695	5.6025	4.533	5.23843	2.31609e-06	0.00951357	cysteine-rich receptor-like protein kinase 25 \\ 0.00E+00 \\ 87.68 % \\ GO:0016020-IEA;GO:0016021-IEA;GO:0004672-IEA;GO:0016740-IEA;GO:0005524-IEA;GO:0006468-IEA \\ membrane-IEA;integral component of membrane-IEA;protein kinase activity-IEA;transferase ac		Protein kinase domain	TRINITY_DN6724_c0_g1	FvH4_6g47740.1	1.95725	8.522	6.56475	4.35407	0.000149046	0.0767602	UDP-glycosyltransferase 13-like \\ 0.00E+00 \\ 86.59 % \\ GO:0016757-IEA;GO:0016758-IEA;GO:0016740-IEA \\ transferase activity, transferring glycosyl groups-IEA;transferase activity, transferring hexosyl groups-IEA;transferase activity-IEA \\ GO:0016758 \		Protein of unknown function DUF863, plant
TRINITY_DN4106_c0_g1	FvH4_6g32710.1	17.94	93.719	75.779	5.22402	1.52337e-05	0.0201682	hypothetical protein RchiOBHm_Chr2g0141731 \\ 2.30E-93 \\ 65.04 %			TRINITY_DN4125_c0_g1	FvH4_1g27430.1	6.6185	28.8083	22.1898	4.35269	0.000297357	0.111302	probable polyamine oxidase 4 \\ 7.80E-168 \\ 87.44 % \\ GO:0046592-IEA;GO:0052896-IEA;GO:0052893-IEA;GO:0016491-IEA;GO:0055114-IEA;GO:0006598-IEA;GO:0005777-IEA;GO:0052900-IEA \\ polyamine oxidase activity-IEA;spermidine oxidase (propane-1,3-diamine-formi	polyamine oxidase [EC:1.5.3.17 1.5.3.-]	Flavin amine oxidase
TRINITY_DN125_c0_g1	FvH4_2g27430.1	8.067	42.0907	34.0237	5.21765	0.000287313	0.0962092	NAC domain-containing protein 2 \\ 1.70E-95 \\ 97.44 % \\ GO:0003677-IEA;GO:0006355-IEA;GO:0005634-IEA \\ DNA binding-IEA;regulation of transcription, DNA-templated-IEA;nucleus-IEA \\ GO:0003677;GO:0005634;GO:0006355 \\ DNA binding;nucleus;regulation of t		NAC domain	TRINITY_DN2295_c0_g1	FvH4_4g02850.1	44.842	194.795	149.953	4.34402	0.0214668	1	glu S.griseus protease inhibitor-like \\ 7.20E-36 \\ 63.34 % \\ GO:0005768-IEA;GO:0005802-IEA;GO:0001888-IEA;GO:0052541-IEA;GO:0016020-IEA;GO:0016021-IEA;GO:0016740-IEA;GO:0010401-IEA;GO:0010087-IEA;GO:0016757-IEA;GO:0005794-IEA;GO:0006486-IEA;GO:0009737-		Proteinase inhibitor I13, potato inhibitor I
TRINITY_DN12105_c0_g1	FvH4_3g00340.1	1.84875	9.62775	7.779	5.20771	0.000242756	0.0880506	nudix hydrolase 2-like \\ 0.00E+00 \\ 72.26 % \\ GO:0007165-IEA;GO:0016020-IEA;GO:0016021-IEA;GO:0043531-IEA;GO:0016787-IEA \\ signal transduction-IEA;membrane-IEA;integral component of membrane-IEA;ADP binding-IEA;hydrolase activity-IEA \\ GO:0016020 \\		NUDIX hydrolase domain	TRINITY_DN7730_c0_g1	FvH4_5g02720.1	5.342	23.1152	17.7732	4.32708	1.11347e-05	0.0232993	hydroxyproline-rich glycoprotein family protein \\ 0.00E+00 \\ 79.80 %
TRINITY_DN3209_c0_g2	FvH4_3g38650.1	6.1625	32.0123	25.8498	5.19469	0.0105323	0.673621	probable pyridoxal 5'-phosphate synthase subunit PDX1 \\ 0.00E+00 \\ 94.76 % \\ GO:0042823-IEA;GO:0003824-IEA;GO:0042819-IEA;GO:0016829-IEA;GO:0036381-IEA \\ pyridoxal phosphate biosynthetic process-IEA;catalytic activity-IEA;vitamin B6 biosynthetic proce	pyridoxal 5'-phosphate synthase pdxS subunit [EC:4.3.3.6]	Pyridoxal 5'-phosphate synthase subunit PdxS/SNZ	TRINITY_DN3135_c1_g1	FvH4_3g39850.1	4.98625	21.5375	16.5513	4.31938	0.000248143	0.101791	WRKY transcription factor WRKY24-like isoform X1 \\ 0.00E+00 \\ 81.19 % \\ GO:0003677-IEA;GO:0003700-IEA;GO:0006355-IEA;GO:0043565-IEA;GO:0005634-IEA \\ DNA binding-IEA;DNA-binding transcription factor activity-IEA;regulation of transcription, DNA-templat	WRKY transcription factor 33	WRKY domain
TRINITY_DN1081_c0_g1	FvH4_3g26010.1	46.4393	241.09	194.651	5.19152	0.00430959	0.413342	pathogenesis-related protein PR-4-like \\ 0.00E+00 \\ 90.45 % \\ GO:0051213-IEA;GO:0051213-IBA;GO:0016491-IEA;GO:0046872-IEA;GO:0055114-IEA \\ dioxygenase activity-IEA;dioxygenase activity-IBA;oxidoreductase activity-IEA;metal ion binding-IEA;oxidation-re		Barwin domain	TRINITY_DN1344_c1_g2	FvH4_4g05160.1	5.05025	21.5422	16.492	4.26558	0.0247066	1	ammonium transporter 1 member 1 \\ 0.00E+00 \\ 94.09 % \\ GO:0008519-IEA;GO:0015696-IEA;GO:0072488-IEA;GO:0016020-IEA;GO:0016021-IEA \\ ammonium transmembrane transporter activity-IEA;ammonium transport-IEA;ammonium transmembrane transport-IEA;membrane-IE		Ammonium transporter
TRINITY_DN12655_c0_g1	FvH4_2g02860.1	0.74975	3.89225	3.1425	5.1914	0.0276353	1	pathogenesis-related protein 1-like \\ 1.70E-12 \\ 82.97 % \\ GO:0008152-IEA;GO:0004338-IEA;GO:0009277-IBA;GO:0009986-IBA;GO:0042124-IBA;GO:0016740-IEA;GO:0042973-IBA;GO:0005576-IBA;GO:0016798-IEA;GO:0016787-IEA \\ metabolic process-IEA;glucan exo-1,3-bet		Cysteine-rich secretory protein, allergen V5/Tpx-1-related	TRINITY_DN4005_c0_g1	FvH4_4g33450.1	2.85975	12.134	9.27425	4.24303	0.00304243	0.366555	aspartate-semialdehyde dehydrogenase \\ 1.70E-109 \\ 90.49 % \\ GO:0005737-IEA;GO:0009507-IEA;GO:0016491-IEA;GO:0051287-IEA;GO:0005739-IEA;GO:0050661-IEA;GO:0046983-IEA;GO:0055114-IEA;GO:0016620-IEA;GO:0009086-IEA;GO:0009097-IEA;GO:0009570-IEA;GO:0004073-	aspartate-semialdehyde dehydrogenase [EC:1.2.1.11]	Semialdehyde dehydrogenase, NAD-binding
TRINITY_DN14129_c0_g2	FvH4_6g14670.1	0.818	4.241	3.423	5.1846	0.00177134	0.259732	exocyst complex component EXO70A1-like \\ 0.00E+00 \\ 81.70 % \\ GO:0000145-IEA;GO:0015031-IEA;GO:0006887-IEA \\ exocyst-IEA;protein transport-IEA;exocytosis-IEA \\ GO:0000145;GO:0006887;GO:0015031 \\ exocyst;exocytosis;protein transport	exocyst complex component 7	Exocyst complex component Exo70	TRINITY_DN32_c1_g2	FvH4_3g29740.1	19.553	82.6072	63.0542	4.22479	8.71583e-05	0.0598242	pleiotropic drug resistance protein 2-like \\ 0.00E+00 \\ 93.43 % \\ GO:0000166-IEA;GO:0016020-IEA;GO:0016021-IEA;GO:0042908-IEA;GO:0102026-IEA;GO:0016787-IEA;GO:0016887-IEA;GO:0015623-IEA;GO:0015688-IEA;GO:0055085-IEA;GO:0008559-IEA;GO:0006855-IEA;GO:000		ABC transporter-like
TRINITY_DN582_c0_g4	FvH4_5g14730.1	4.96975	25.7482	20.7785	5.181	0.00899772	0.619371	PREDICTED: uncharacterized protein LOC101300623 \\ 1.20E-09 \\ 100.00 %			TRINITY_DN4641_c0_g1	FvH4_3g20170.1	0.87175	3.67825	2.8065	4.21939	0.00713236	0.575351	dynein light chain, cytoplasmic-like \\ 0.00E+00 \\ 74.46 % \\ GO:0030749-IEA;GO:0008168-IEA;GO:0016740-IEA;GO:0032259-IEA \\ loganate O-methyltransferase activity-IEA;methyltransferase activity-IEA;transferase activity-IEA;methylation-IEA \\ GO:0030749;G		Dynein light chain, type 1/2
TRINITY_DN10987_c1_g1	FvH4_6g38620.1	2.092	10.8245	8.7325	5.17424	6.44514e-06	0.016275	aspartyl protease family protein 2-like \\ 0.00E+00 \\ 86.61 % \\ GO:0004190-IEA;GO:0003735-IEA;GO:0008233-IEA;GO:0006508-IEA;GO:0005840-IEA;GO:0016787-IEA;GO:0006412-IEA \\ aspartic-type endopeptidase activity-IEA;structural constituent of ribosome-IEA;p		Aspartic peptidase A1 family	TRINITY_DN326827_c0_g1	FvH4_3g03600.1	1.34875	5.686	4.33725	4.21576	7.41249e-05	0.0554263	calcium-binding protein PBP1-like \\ 6.60E-33 \\ 62.17 %
TRINITY_DN15_c0_g2	FvH4_6g06090.1	9.03275	46.5333	37.5005	5.15161	2.26724e-06	0.00951357	probable linoleate 9S-lipoxygenase 5 \\ 0.00E+00 \\ 92.10 % \\ GO:0016702-IEA;GO:0031408-IEA;GO:0051213-IEA;GO:0016491-IEA;GO:0046872-IEA;GO:0055114-IEA;GO:0006633-IEA \\ oxidoreductase activity, acting on single donors with incorporation of molecular oxy	linoleate 9S-lipoxygenase [EC:1.13.11.58]	Lipoxygenase	TRINITY_DN16867_c0_g1	FvH4_4g35930.1	1.79575	7.53225	5.7365	4.19449	0.000168433	0.082329	glutamate decarboxylase 4-like \\ 0.00E+00 \\ 91.55 % \\ GO:0030170-IEA;GO:0003824-IEA;GO:0016829-IEA;GO:0019752-IEA;GO:0004351-IEA;GO:0006536-IEA;GO:0016831-IEA \\ pyridoxal phosphate binding-IEA;catalytic activity-IEA;lyase activity-IEA;carboxylic acid	glutamate decarboxylase [EC:4.1.1.15]	Pyridoxal phosphate-dependent decarboxylase
TRINITY_DN211460_c0_g1	FvH4_7g04040.1	0.287	1.47475	1.18775	5.1385	0.00303635	0.339039	probable carboxylesterase 15 \\ 3.80E-48 \\ 85.18 %		Alpha/beta hydrolase fold-3	TRINITY_DN3218_c0_g1	FvH4_7g04070.1	34.73	145.665	110.935	4.19421	0.0174065	0.918224	probable carboxylesterase 15 \\ 0.00E+00 \\ 87.07 % \\ GO:0052689-IEA;GO:0016787-IEA \\ carboxylic ester hydrolase activity-IEA;hydrolase activity-IEA \\ GO:0052689 \\ carboxylic ester hydrolase activity		Alpha/beta hydrolase fold-3
TRINITY_DN5694_c0_g1	FvH4_5g16230.1	34.169	174.461	140.292	5.10583	0.000781588	0.163354	protein EDS1L-like \\ 0.00E+00 \\ 69.94 % \\ GO:0052689-IEA;GO:0006629-IEA;GO:0016787-IEA \\ carboxylic ester hydrolase activity-IEA;lipid metabolic process-IEA;hydrolase activity-IEA \\ GO:0006629;GO:0052689 \\ lipid metabolic process;carboxylic ester hy		Fungal lipase-like domain	TRINITY_DN17395_c0_g1	FvH4_2g28040.1	0.36525	1.51525	1.15	4.14853	4.48362e-05	0.0439894	4-hydroxycoumarin synthase 1-like \\ 1.80E-121 \\ 71.85 % \\ GO:0007165-IEA;GO:0016020-IEA;GO:0016021-IEA;GO:0043531-IEA;GO:0016787-IEA \\ signal transduction-IEA;membrane-IEA;integral component of membrane-IEA;ADP binding-IEA;hydrolase activity-IEA \\ GO	chalcone synthase [EC:2.3.1.74]	Chalcone/stilbene synthase, N-terminal
TRINITY_DN329_c0_g2	FvH4_6g20840.1	0.7985	4.07075	3.27225	5.098	1.90322e-06	0.00927909	calcium-dependent protein kinase 26-like \\ 0.00E+00 \\ 86.17 % \\ GO:0005509-IEA;GO:0016310-IEA;GO:0004672-IEA;GO:0016740-IEA;GO:0004683-IEA;GO:0016301-IEA;GO:0005524-IEA;GO:0006468-IEA \\ calcium ion binding-IEA;phosphorylation-IEA;protein kinase activi	calcium-dependent protein kinase [EC:2.7.11.1]	Protein kinase domain	TRINITY_DN2521_c0_g1	FvH4_6g20160.1	35.7713	148.141	112.369	4.14133	0.00230675	0.319131	protein YLS9-like \\ 2.90E-155 \\ 91.04 % \\ GO:0016020-IEA;GO:0016021-IEA \\ membrane-IEA;integral component of membrane-IEA \\ GO:0016021 \\ integral component of membrane		Late embryogenesis abundant protein, LEA-14
TRINITY_DN133813_c4_g1	FvH4_6g32890.1	0.681	3.4675	2.7865	5.09178	0.000665006	0.151306	hypothetical protein RchiOBHm_Chr2g0142321 \\ 2.30E-68 \\ 71.29 % \\ GO:0003700-IEA;GO:0006355-IEA \\ DNA-binding transcription factor activity-IEA;regulation of transcription, DNA-templated-IEA \\ GO:0003700;GO:0006355 \\ DNA-binding transcription factor			TRINITY_DN4817_c0_g1	FvH4_3g14410.1	0.9365	3.8715	2.935	4.13401	0.0226744	1	---NA--- \\ 9.20E-101 \\ 93.49 % \\ GO:0000166-IEA;GO:0042626-IEA;GO:0055085-IEA;GO:0016020-IEA;GO:0016021-IEA;GO:0005524-IEA;GO:0016887-IEA \\ nucleotide binding-IEA;ATPase activity, coupled to transmembrane movement of substances-IEA;transmembrane trans
TRINITY_DN260304_c0_g1	FvH4_6g35980.1	5.4425	27.6497	22.2072	5.08034	9.21652e-06	0.0187773	RING-H2 finger protein ATL3 \\ 1.90E-165 \\ 78.94 % \\ GO:0016020-IEA;GO:0016021-IEA;GO:0016567-IBA;GO:0005886-IBA \\ membrane-IEA;integral component of membrane-IEA;protein ubiquitination-IBA;plasma membrane-IBA \\ GO:0005886;GO:0016021;GO:0016567 \\ pla		Zinc finger, RING-type	TRINITY_DN3176_c0_g1	FvH4_5g00090.1	15.8872	65.4805	49.5933	4.12158	0.00135101	0.24086	L-lactate dehydrogenase A-like \\ 2.70E-135 \\ 87.85 % \\ GO:0004459-IEA;GO:0005737-IEA;GO:0016616-IEA;GO:0016491-IEA;GO:0003824-IEA;GO:0019752-IEA;GO:0055114-IEA;GO:0005975-IEA \\ L-lactate dehydrogenase activity-IEA;cytoplasm-IEA;oxidoreductase activity	L-lactate dehydrogenase [EC:1.1.1.27]	Lactate/malate dehydrogenase, N-terminal
TRINITY_DN271_c0_g1	FvH4_6g11780.1	0.494	2.49175	1.99775	5.04403	0.000444013	0.122789	PREDICTED: uncharacterized protein LOC101295826 \\ 3.50E-50 \\ 88.45 % \\ GO:0008150-ND;GO:0016020-IEA;GO:0016021-IEA;GO:0005575-ND;GO:0016740-IEA;GO:0003674-ND \\ biological_process-ND;membrane-IEA;integral component of membrane-IEA;cellular_component-ND			TRINITY_DN2771_c0_g1	FvH4_2g12540.1	9.47925	39.0513	29.572	4.11966	8.49987e-06	0.0206186	LEAF RUST 10 DISEASE-RESISTANCE LOCUS RECEPTOR-LIKE PROTEIN KINASE-like 1.4 \\ 0.00E+00 \\ 80.02 % \\ GO:0016020-IEA;GO:0016021-IEA;GO:0016740-IEA;GO:0004672-IEA;GO:0030247-IEA;GO:0005524-IEA;GO:0006468-IEA \\ membrane-IEA;integral component of membrane-I		Protein kinase domain
TRINITY_DN401_c0_g3	FvH4_6g53000.1	0.936	4.7025	3.7665	5.02404	0.000726384	0.157919	beta-glucosidase 13-like \\ 0.00E+00 \\ 75.76 % \\ GO:0008152-IEA;GO:0008422-IEA;GO:0102483-IEA;GO:0004553-IEA;GO:0016787-IEA;GO:0005975-IEA;GO:0016798-IEA \\ metabolic process-IEA;beta-glucosidase activity-IEA;scopolin beta-glucosidase activity-IEA;hydro	beta-glucosidase [EC:3.2.1.21]	Glycoside hydrolase family 1	TRINITY_DN251_c0_g2	FvH4_6g09510.1	1.1255	4.629	3.5035	4.11284	0.0126443	0.776717	acid phosphatase 1-like		Acid phosphatase, class B-like
TRINITY_DN12944_c0_g1	FvH4_5g18490.1	4.6415	23.1105	18.469	4.9791	0.000125736	0.0597768	putative GEM-like protein 8 \\ 2.20E-142 \\ 83.13 % \\ GO:0004866-IEA;GO:0010951-IEA \\ endopeptidase inhibitor activity-IEA;negative regulation of endopeptidase activity-IEA \\ GO:0004866;GO:0010951 \\ endopeptidase inhibitor activity;negative regulation		GRAM domain	TRINITY_DN13748_c0_g1	FvH4_2g37950.1	0.753	3.083	2.33	4.09429	0.00541517	0.493565	PREDICTED: uncharacterized protein At1g76070-like \\ 0.00E+00 \\ 73.65 % \\ GO:0003824-IEA;GO:0004099-IEA;GO:0005975-IEA;GO:0016787-IEA;GO:0016810-IEA \\ catalytic activity-IEA;chitin deacetylase activity-IEA;carbohydrate metabolic process-IEA;hydrolase a
TRINITY_DN22079_c0_g1	FvH4_5g37950.1	4.49975	22.353	17.8532	4.96761	3.80832e-05	0.0314539	glucan 1,3-beta-glucosidase A-like \\ 0.00E+00 \\ 89.70 % \\ GO:0008152-IEA;GO:0051015-IEA;GO:0007015-IEA;GO:0004553-IEA;GO:0016798-IEA;GO:0005975-IEA;GO:0016787-IEA \\ metabolic process-IEA;actin filament binding-IEA;actin filament organization-IEA;hydro		Glycoside hydrolase, family 5	TRINITY_DN11218_c0_g1	FvH4_3g44360.1	9.4615	38.7157	29.2542	4.09193	0.000617122	0.158758	peroxidase 15-like \\ 1.30E-141 \\ 87.42 % \\ GO:0045892-IEA \\ negative regulation of transcription, DNA-templated-IEA \\ GO:0045892 \\ negative regulation of transcription, DNA-templated	peroxidase [EC:1.11.1.7]	Plant peroxidase
TRINITY_DN4524_c2_g1	FvH4_5g38240.1	0.4095	2.0255	1.616	4.94628	0.0098356	0.650365	hypothetical protein RchiOBHm_Chr7g0240201 \\ 3.80E-07 \\ 94.79 % \\ GO:0016020-IEA;GO:0016021-IEA;GO:0016573-IEA;GO:0016740-IEA;GO:0004402-IEA \\ membrane-IEA;integral component of membrane-IEA;histone acetylation-IEA;transferase activity-IEA;histone ace			TRINITY_DN29242_c0_g1	FvH4_2g37500.1	2.06175	8.396	6.33425	4.07227	2.25105e-05	0.0318914	vinorine synthase-like \\ 0.00E+00 \\ 65.55 % \\ GO:0016746-IEA;GO:0016747-IEA;GO:0047180-IEA;GO:0016740-IEA;GO:0050636-IEA \\ transferase activity, transferring acyl groups-IEA;transferase activity, transferring acyl groups other than amino-acyl groups-I		Transferase
TRINITY_DN2521_c0_g1	FvH4_6g20160.1	30.0972	148.141	118.043	4.92206	0.00187588	0.267048	protein YLS9-like \\ 2.90E-155 \\ 91.04 % \\ GO:0016020-IEA;GO:0016021-IEA \\ membrane-IEA;integral component of membrane-IEA \\ GO:0016021 \\ integral component of membrane		Late embryogenesis abundant protein, LEA-14	TRINITY_DN14784_c0_g1	FvH4_5g07620.1	0.67175	2.7295	2.05775	4.06327	0.019584	0.98205	uncharacterized N-acetyltransferase DDB_G0290199 \\ 1.80E-05 \\ 91.07 % \\ GO:0004029-IEA;GO:0016491-IEA;GO:0055114-IEA;GO:0016620-IEA;GO:0043878-IEA \\ aldehyde dehydrogenase (NAD) activity-IEA;oxidoreductase activity-IEA;oxidation-reduction process-IEA;
TRINITY_DN262174_c0_g1	FvH4_1g29930.1	1.139	5.593	4.454	4.91045	0.000147908	0.0659421	U-box domain-containing protein 21-like \\ 1.50E-105 \\ 77.84 % \\ GO:0016787-IEA \\ hydrolase activity-IEA		U box domain	TRINITY_DN3267_c0_g1	FvH4_6g26300.1	1.11325	4.5055	3.39225	4.04716	0.00466671	0.458881	probable L-type lectin-domain containing receptor kinase VII.2 \\ 0.00E+00 \\ 81.87 % \\ GO:0000166-IEA;GO:0016020-IEA;GO:0016021-IEA;GO:0016310-IEA;GO:0004672-IEA;GO:0016740-IEA;GO:0016301-IEA;GO:0030246-IEA;GO:0004674-IEA;GO:0005524-IEA;GO:0006468-IEA \		Protein kinase domain
TRINITY_DN4328_c1_g1	FvH4_6g13200.1	7.63625	37.3525	29.7162	4.89147	1.61811e-05	0.0202091	L-type lectin-domain containing receptor kinase IV.1-like \\ 0.00E+00 \\ 90.52 % \\ GO:0016020-IEA;GO:0016021-IEA;GO:0016740-IEA;GO:0004672-IEA;GO:0030246-IEA;GO:0005524-IEA;GO:0006468-IEA \\ membrane-IEA;integral component of membrane-IEA;transferase act		Protein kinase domain	TRINITY_DN1537_c0_g6	FvH4_6g35370.1	1.1905	4.818	3.6275	4.04704	0.0146881	0.844212	---NA--- \\ 0.00E+00 \\ 82.48 % \\ GO:0016020-IEA;GO:0016021-IEA;GO:0008168-IEA;GO:0016740-IEA;GO:0032259-IEA \\ membrane-IEA;integral component of membrane-IEA;methyltransferase activity-IEA;transferase activity-IEA;methylation-IEA \\ GO:0008168;GO:00160
TRINITY_DN9963_c0_g1	FvH4_5g17690.1	7.5575	36.918	29.3605	4.88495	0.00311075	0.343956	mitogen-activated protein kinase kinase 9-like \\ 1.10E-142 \\ 64.63 % \\ GO:0008233-IEA;GO:0071586-IEA;GO:0006508-IEA;GO:0008237-IEA;GO:0004222-IEA;GO:0016787-IEA \\ peptidase activity-IEA;CAAX-box protein processing-IEA;proteolysis-IEA;metallopeptidase	mitogen-activated protein kinase kinase 9 [EC:2.7.12.2]	Protein kinase domain	TRINITY_DN9698_c0_g1	FvH4_5g20770.1	1.653	6.6475	4.9945	4.02148	5.63464e-05	0.0491746	probable receptor-like protein kinase At5g47070 \\ 0.00E+00 \\ 89.92 % \\ GO:0000166-IEA;GO:0016310-IEA;GO:0004672-IEA;GO:0016740-IEA;GO:0016301-IEA;GO:0004674-IEA;GO:0005524-IEA;GO:0006468-IEA \\ nucleotide binding-IEA;phosphorylation-IEA;protein kinase		Protein kinase domain
TRINITY_DN8506_c0_g1	FvH4_7g26400.1	5.66825	27.6372	21.969	4.8758	0.00119443	0.20684	putative bifunctional inhibitor/plant lipid transfer protein/seed storage helical \\ 1.20E-13 \\ 78.01 % \\ GO:0005506-IEA;GO:0009507-IEA;GO:0016491-IEA;GO:0046872-IEA;GO:0016020-IEA;GO:0016021-IEA;GO:0055114-IEA;GO:0015979-IEA;GO:0022904-IEA;GO:0009055-I			TRINITY_DN2634_c0_g1	FvH4_3g21580.1	3.11825	12.5183	9.4	4.01451	1.6847e-05	0.0296182	scarecrow-like protein 21 \\ 0.00E+00 \\ 87.29 %		Transcription factor GRAS
TRINITY_DN6858_c0_g1	FvH4_5g02080.1	11.2875	54.9813	43.6938	4.87099	0.0094231	0.634659	oxalate--CoA ligase-like \\ 0.00E+00 \\ 90.13 % \\ GO:0050203-IEA;GO:0003987-IEA;GO:0003824-IEA;GO:0016874-IEA \\ oxalate-CoA ligase activity-IEA;acetate-CoA ligase activity-IEA;catalytic activity-IEA;ligase activity-IEA \\ GO:0003987;GO:0050203 \\ acetat	oxalate---CoA ligase [EC:6.2.1.8]	AMP-dependent synthetase/ligase	TRINITY_DN2363_c0_g1	FvH4_7g27800.1	3.0815	12.3185	9.237	3.99757	0.00266315	0.344385	21 kDa protein-like		Pectinesterase inhibitor domain
TRINITY_DN200208_c0_g1	FvH4_5g24400.1	1.6685	8.0815	6.413	4.84357	0.00107771	0.194956	Glycosyl transferase \\ 0.00E+00 \\ 91.92 % \\ GO:0016779-IEA;GO:0016740-IEA;GO:0008773-IEA \\ nucleotidyltransferase activity-IEA;transferase activity-IEA;[protein-PII] uridylyltransferase activity-IEA \\ GO:0008773 \\ [protein-PII] uridylyltransferase a		Glycosyl transferase, family 1	TRINITY_DN71430_c1_g1	FvH4_1g23120.1	1.26725	5.0525	3.78525	3.98698	0.037481	1	2-alkenal reductase (NADP(+)-dependent)-like \\ 6.10E-109 \\ 75.57 % \\ GO:0003677-IEA;GO:0000775-IEA;GO:0003696-IEA \\ DNA binding-IEA;chromosome, centromeric region-IEA;satellite DNA binding-IEA \\ GO:0000775;GO:0003696 \\ chromosome, centromeric region		GroES-like superfamily
TRINITY_DN5005_c0_g1	FvH4_4g26570.1	17.9982	87.0735	69.0752	4.83789	0.00100835	0.18907	amino-acid permease BAT1 isoform X1 \\ 0.00E+00 \\ 92.96 % \\ GO:0055085-IEA;GO:0016020-IEA;GO:0016021-IEA;GO:0022857-IEA;GO:0006865-IEA \\ transmembrane transport-IEA;membrane-IEA;integral component of membrane-IEA;transmembrane transporter activity-IEA;			TRINITY_DN15604_c0_g1	FvH4_2g22290.1	0.31075	1.23775	0.927	3.98311	0.0412326	1	ethylene-responsive transcription factor 3-like		AP2/ERF domain
TRINITY_DN4477_c1_g1	FvH4_7g11320.1	10.491	50.7175	40.2265	4.83438	0.00598201	0.492222	pectinesterase 2 \\ 0.00E+00 \\ 86.97 % \\ GO:0004857-IEA;GO:0005618-IEA;GO:0043086-IEA;GO:0045330-IEA;GO:0046910-IBA;GO:0071555-IEA;GO:0030599-IEA;GO:0030599-IBA;GO:0005576-IEA;GO:0042545-IEA;GO:0045490-IEA;GO:0016787-IEA \\ enzyme inhibitor activity-IEA	pectinesterase [EC:3.1.1.11]	Pectinesterase, catalytic	TRINITY_DN8358_c0_g3	FvH4_3g40360.1	0.848	3.373	2.525	3.97759	0.047614	1	expansin-A4-like precursor \\ 7.60E-10 \\ 92.78 % \\ GO:0003677-IEA;GO:0016779-IEA;GO:0032549-IEA;GO:0003899-IEA;GO:0003899-IBA;GO:0001056-IBA;GO:0006351-IEA;GO:0006383-IEA;GO:0016740-IEA;GO:0005666-IBA \\ DNA binding-IEA;nucleotidyltransferase activity-I		Expansin
TRINITY_DN5194_c0_g1	FvH4_1g04240.1	0.30675	1.4765	1.16975	4.81337	0.000724211	0.157919	auxin-responsive protein IAA1-like		PB1 domain	TRINITY_DN3469_c2_g1	FvH4_7g03210.1	2.69925	10.7155	8.01625	3.96981	0.0155138	0.867553	NADPH:quinone oxidoreductase-like \\ 2.10E-13 \\ 62.65 % \\ GO:0003677-IEA;GO:0006355-IEA;GO:0005634-IEA \\ DNA binding-IEA;regulation of transcription, DNA-templated-IEA;nucleus-IEA		NADPH-dependent FMN reductase-like
TRINITY_DN6189_c1_g2	FvH4_5g19840.1	22.0085	105.834	83.8255	4.80878	0.00150379	0.236606	ethylene-responsive transcription factor 2 \\ 4.50E-106 \\ 71.65 %	EREBP-like factor	AP2/ERF domain	TRINITY_DN21273_c0_g1	FvH4_2g16190.1	22.4765	88.9057	66.4292	3.9555	0.00344973	0.392596	endochitinase 2-like \\ 1.90E-178 \\ 61.53 % \\ GO:0045332-IEA;GO:0016020-IEA;GO:0016021-IEA;GO:0004012-IBA;GO:0000324-IBA;GO:0005886-IBA \\ phospholipid translocation-IEA;membrane-IEA;integral component of membrane-IEA;phospholipid-translocating ATPase a	basic endochitinase B [EC:3.2.1.14]	Glycoside hydrolase, family 19, catalytic
TRINITY_DN7625_c0_g1	FvH4_2g15070.1	4.8265	22.9447	18.1182	4.75391	0.00110744	0.19836	NAD(P)H-quinone oxidoreductase subunit 3 like \\ 0.00E+00 \\ 82.64 % \\ GO:0016020-IEA;GO:0016021-IEA;GO:0005524-IEA \\ membrane-IEA;integral component of membrane-IEA;ATP binding-IEA \\ GO:0005524;GO:0016021 \\ ATP binding;integral component of membrane			TRINITY_DN15326_c0_g1	FvH4_7g10340.1	2.17025	8.55	6.37975	3.93964	0.00360461	0.401618	uclacyanin-3 \\ 0.00E+00 \\ 78.99 % \\ GO:0016020-IEA;GO:0016021-IEA;GO:0008289-IEA \\ membrane-IEA;integral component of membrane-IEA;lipid binding-IEA \\ GO:0008289 \\ lipid binding		Phytocyanin domain
TRINITY_DN291562_c0_g1	FvH4_2g04120.1	1.9805	9.3985	7.418	4.74552	0.0144965	0.808317	zinc finger protein ZAT10-like		Zinc finger C2H2-type	TRINITY_DN118_c0_g1	FvH4_2g02540.1	12.8975	50.7583	37.8608	3.93551	0.000863017	0.189501	receptor-like protein kinase HAIKU2 \\ 0.00E+00 \\ 80.74 % \\ GO:0000166-IEA;GO:0016020-IEA;GO:0016021-IEA;GO:0016310-IEA;GO:0016740-IEA;GO:0004672-IEA;GO:0016301-IEA;GO:0004674-IEA;GO:0005524-IEA;GO:0006468-IEA \\ nucleotide binding-IEA;membrane-IEA;inte		Protein kinase domain
TRINITY_DN3623_c0_g1	FvH4_2g02760.1	8.856	42.0157	33.1597	4.74433	0.00818098	0.584488	branched-chain-amino-acid aminotransferase 2, chloroplastic-like \\ 0.00E+00 \\ 85.10 % \\ GO:0052655-IEA;GO:0052656-IEA;GO:0052654-IEA;GO:0004084-IEA;GO:0003824-IEA;GO:0008483-IEA;GO:0008652-IEA;GO:0016740-IEA;GO:0009082-IEA;GO:0009081-IEA \\ L-valine tr	branched-chain amino acid aminotransferase [EC:2.6.1.42]	Aminotransferase class IV	TRINITY_DN6432_c1_g1	FvH4_4g33230.1	3.17275	12.4743	9.3015	3.93168	0.00117736	0.223895	G-type lectin S-receptor-like serine/threonine-protein kinase At1g34300 \\ 0.00E+00 \\ 82.10 % \\ GO:0000166-IEA;GO:0048544-IEA;GO:0016020-IEA;GO:0016021-IEA;GO:0016310-IEA;GO:0016740-IEA;GO:0004672-IEA;GO:0016301-IEA;GO:0004674-IEA;GO:0030246-IEA;GO:0005		Protein kinase domain
TRINITY_DN8338_c0_g1	FvH4_1g24040.1	0.6375	3.0245	2.387	4.74431	0.00459436	0.428774	protein MKS1-like \\ 3.70E-126 \\ 63.14 %		VQ	TRINITY_DN200208_c0_g1	FvH4_5g24400.1	2.05975	8.0815	6.02175	3.92353	0.00104904	0.20972	Glycosyl transferase \\ 0.00E+00 \\ 91.92 % \\ GO:0016779-IEA;GO:0016740-IEA;GO:0008773-IEA \\ nucleotidyltransferase activity-IEA;transferase activity-IEA;[protein-PII] uridylyltransferase activity-IEA \\ GO:0008773 \\ [protein-PII] uridylyltransferase a		Glycosyl transferase, family 1
TRINITY_DN11088_c1_g1	FvH4_6g20500.1	3.965	18.7338	14.7688	4.72478	0.00598562	0.492387	hypothetical protein RchiOBHm_Chr3g0476381 \\ 5.20E-160 \\ 66.29 % \\ GO:0003677-IEA;GO:0003700-IEA;GO:0006355-IEA;GO:0043565-IEA;GO:0005634-IEA \\ DNA binding-IEA;DNA-binding transcription factor activity-IEA;regulation of transcription, DNA-templated-IE			TRINITY_DN11109_c0_g1	FvH4_6g05650.1	12.0843	47.3933	35.309	3.9219	0.00161192	0.264562	mevalonate kinase \\ 4.30E-131 \\ 87.30 % \\ GO:0000166-IEA;GO:0005737-IEA;GO:0006629-IEA;GO:0016020-IEA;GO:0019287-IEA;GO:0016021-IEA;GO:0016310-IEA;GO:0016740-IEA;GO:0016301-IEA;GO:0016126-IEA;GO:0008299-IEA;GO:0008202-IEA;GO:0006694-IEA;GO:0004496-IEA;	mevalonate kinase [EC:2.7.1.36]	GHMP kinase, ATP-binding, conserved site
TRINITY_DN10852_c0_g1	FvH4_2g22890.1	0.48475	2.284	1.79925	4.71171	0.00278253	0.325937	calmodulin-like protein 11 \\ 3.60E-127 \\ 83.11 % \\ GO:0005509-IEA;GO:0009536-IEA \\ calcium ion binding-IEA;plastid-IEA \\ GO:0005509 \\ calcium ion binding			TRINITY_DN1270_c0_g1	FvH4_4g06170.1	10.0165	39.273	29.2565	3.92083	8.8766e-05	0.0598855	DExH-box ATP-dependent RNA helicase DExH10 \\ 0.00E+00 \\ 94.20 % \\ GO:0003723-IEA;GO:0003724-IEA;GO:0000460-IBA;GO:0004386-IEA;GO:0004004-IBA;GO:0006401-IEA;GO:0006401-IBA;GO:0005524-IEA;GO:0005634-IBA;GO:0016787-IEA;GO:0003676-IEA \\ RNA binding-IEA;RN	ATP-dependent RNA helicase DOB1 [EC:3.6.4.13]	Helicase, C-terminal
TRINITY_DN16377_c0_g1	FvH4_6g45940.1	6.55425	30.7708	24.2165	4.69478	4.85049e-07	0.00569332	protein GLUTAMINE DUMPER 4-like			TRINITY_DN4937_c1_g3	FvH4_2g13110.1	174.961	685.962	511.001	3.92065	0.00740595	0.585163	peroxidase 12 \\ 4.80E-126 \\ 93.07 % \\ GO:0006979-IEA;GO:0004601-IEA;GO:0016491-IEA;GO:0046872-IEA;GO:0020037-IEA;GO:0055114-IEA;GO:0098869-IEA;GO:0005576-IEA;GO:0042744-IEA \\ response to oxidative stress-IEA;peroxidase activity-IEA;oxidoreductase acti	peroxidase [EC:1.11.1.7]	Plant peroxidase
TRINITY_DN27360_c0_g1	FvH4_5g29050.1	1.4505	6.8065	5.356	4.69252	0.00176448	0.259106	U-box domain-containing protein 16 \\ 0.00E+00 \\ 88.04 % \\ GO:0016746-IEA;GO:0016740-IEA;GO:0016874-IEA;GO:0016567-IEA;GO:0004842-IEA \\ transferase activity, transferring acyl groups-IEA;transferase activity-IEA;ligase activity-IEA;protein ubiquitinati		Armadillo	TRINITY_DN2953_c0_g3	FvH4_3g26210.1	1.7885	6.987	5.1985	3.90663	1.3305e-05	0.025618	PREDICTED: uncharacterized protein LOC101309119 \\ 0.00E+00 \\ 72.46 % \\ GO:0003677-IEA;GO:0006355-IEA;GO:0005634-IEA \\ DNA binding-IEA;regulation of transcription, DNA-templated-IEA;nucleus-IEA \\ GO:0003677;GO:0005634;GO:0006355 \\ DNA binding;nucleus
TRINITY_DN10436_c0_g1	FvH4_6g45680.1	0.6045	2.832	2.2275	4.68486	0.00303596	0.339039	tryptophan synthase beta chain 2 \\ 0.00E+00 \\ 87.94 % \\ GO:0030170-IEA;GO:0004834-IEA;GO:0052684-IBA;GO:0000162-IEA;GO:0000162-IBA;GO:0016829-IEA;GO:0006568-IEA \\ pyridoxal phosphate binding-IEA;tryptophan synthase activity-IEA;L-serine hydro-lyase (a	tryptophan synthase beta chain [EC:4.2.1.20]	Pyridoxal-phosphate dependent enzyme	TRINITY_DN2701_c1_g1	FvH4_6g11080.1	0.51325	2.00325	1.49	3.90307	0.00173163	0.273151	receptor-like protein 12 \\ 0.00E+00 \\ 81.50 % \\ GO:0016020-IEA;GO:0016021-IEA \\ membrane-IEA;integral component of membrane-IEA \\ GO:0016021 \\ integral component of membrane		Leucine-rich repeat
TRINITY_DN4125_c0_g1	FvH4_1g27430.1	6.168	28.8083	22.6403	4.6706	0.000268421	0.0929129	probable polyamine oxidase 4 \\ 7.80E-168 \\ 87.44 % \\ GO:0046592-IEA;GO:0052896-IEA;GO:0052893-IEA;GO:0016491-IEA;GO:0055114-IEA;GO:0006598-IEA;GO:0005777-IEA;GO:0052900-IEA \\ polyamine oxidase activity-IEA;spermidine oxidase (propane-1,3-diamine-formi	polyamine oxidase [EC:1.5.3.17 1.5.3.-]	Flavin amine oxidase	TRINITY_DN3119_c0_g1	FvH4_6g17290.1	2.19125	8.5455	6.35425	3.89983	0.000923227	0.195936	aspartic proteinase-like protein 2 \\ 8.20E-155 \\ 92.65 % \\ GO:0004190-IEA;GO:0008233-IEA;GO:0006508-IEA;GO:0016020-IEA;GO:0016021-IEA;GO:0016787-IEA \\ aspartic-type endopeptidase activity-IEA;peptidase activity-IEA;proteolysis-IEA;membrane-IEA;integra		Aspartic peptidase A1 family
TRINITY_DN7010_c1_g1	FvH4_3g44150.1	0.61925	2.878	2.25875	4.64756	0.00508353	0.453155	non-structural maintenance of chromosomes element 4 homolog A-like		Non-structural maintenance of chromosome element 4, C-terminal	TRINITY_DN3623_c0_g1	FvH4_2g02760.1	10.7785	42.0157	31.2372	3.89811	0.00943773	0.664437	branched-chain-amino-acid aminotransferase 2, chloroplastic-like \\ 0.00E+00 \\ 85.10 % \\ GO:0052655-IEA;GO:0052656-IEA;GO:0052654-IEA;GO:0004084-IEA;GO:0003824-IEA;GO:0008483-IEA;GO:0008652-IEA;GO:0016740-IEA;GO:0009082-IEA;GO:0009081-IEA \\ L-valine tr	branched-chain amino acid aminotransferase [EC:2.6.1.42]	Aminotransferase class IV
TRINITY_DN1746_c0_g3	FvH4_4g34740.1	0.39825	1.85025	1.452	4.64595	0.0110254	0.692335	Transmembrane protein \\ 0.00E+00 \\ 85.07 % \\ GO:0047372-IEA;GO:0003824-IEA;GO:0004806-IEA;GO:0016787-IEA \\ acylglycerol lipase activity-IEA;catalytic activity-IEA;triglyceride lipase activity-IEA;hydrolase activity-IEA \\ GO:0004806;GO:0047372 \\ trig			TRINITY_DN6479_c0_g1	FvH4_3g08420.1	1.61525	6.283	4.66775	3.8898	0.00514717	0.47965	PREDICTED: uncharacterized protein LOC101307761 \\ 2.70E-83 \\ 55.78 % \\ GO:0046872-IEA \\ metal ion binding-IEA		Protein of unknown function DUF599
TRINITY_DN222_c0_g1	FvH4_1g17620.1	1.1855	5.50775	4.32225	4.64593	2.4638e-05	0.0246004	calcium-transporting ATPase 2, plasma membrane-type-like \\ 0.00E+00 \\ 94.85 % \\ GO:0000166-IEA;GO:0005516-IEA;GO:0016020-IEA;GO:0006816-IEA;GO:0016021-IEA;GO:0005388-IEA;GO:0070588-IEA;GO:0006811-IEA;GO:0016787-IEA;GO:0005524-IEA;GO:0099132-IEA \\ nucl	Ca2+-transporting ATPase [EC:3.6.3.8]	P-type ATPase	TRINITY_DN4645_c0_g1	FvH4_6g53780.1	0.77075	2.99475	2.224	3.8855	0.00898303	0.645534	short-chain dehydrogenase reductase 2a \\ 0.00E+00 \\ 66.98 % \\ GO:0003677-IEA \\ DNA binding-IEA \\ GO:0003677 \\ DNA binding		Short-chain dehydrogenase/reductase SDR
TRINITY_DN3476_c0_g1	FvH4_5g36910.1	3.8225	17.6755	13.853	4.62407	3.94812e-05	0.0320078	protein EXORDIUM-like \\ 0.00E+00 \\ 93.76 %		Protein EXORDIUM-like	TRINITY_DN20198_c0_g1	FvH4_3g07830.1	0.418	1.623	1.205	3.88278	2.55746e-06	0.0130281	heavy metal-associated isoprenylated plant protein 20-like \\ 1.40E-18 \\ 81.64 % \\ GO:0007165-IEA;GO:0016020-IEA;GO:0016021-IEA;GO:0043531-IEA;GO:0016787-IEA \\ signal transduction-IEA;membrane-IEA;integral component of membrane-IEA;ADP binding-IEA;hydr		Heavy metal-associated domain, HMA
TRINITY_DN14302_c0_g1	FvH4_3g18790.1	0.23	1.061	0.831	4.61304	0.000814014	0.16727	sodium/calcium exchanger NCL2-like \\ 0.00E+00 \\ 84.53 % \\ GO:0055085-IEA;GO:0016020-IEA;GO:0016021-IEA;GO:0005509-IEA;GO:0016310-IEA;GO:0016301-IEA \\ transmembrane transport-IEA;membrane-IEA;integral component of membrane-IEA;calcium ion binding-IEA;p		EF-hand domain	TRINITY_DN191_c0_g3	FvH4_1g30150.1	2.30175	8.91675	6.615	3.8739	0.000258501	0.104212	aspartic proteinase PCS1 \\ 0.00E+00 \\ 83.63 % \\ GO:0004190-IEA;GO:0008233-IEA;GO:0006508-IEA;GO:0016787-IEA \\ aspartic-type endopeptidase activity-IEA;peptidase activity-IEA;proteolysis-IEA;hydrolase activity-IEA \\ GO:0004190;GO:0006508 \\ aspartic-t		Aspartic peptidase A1 family
TRINITY_DN9635_c0_g2	FvH4_6g34970.1	4.65725	21.4503	16.793	4.60578	0.000138716	0.0631675	linoleate 13S-lipoxygenase 3-1, chloroplastic-like \\ 0.00E+00 \\ 93.14 % \\ GO:0031408-IEA;GO:0016702-IEA;GO:0051213-IEA;GO:0046872-IEA;GO:0016491-IEA;GO:0055114-IEA;GO:0006633-IEA \\ oxylipin biosynthetic process-IEA;oxidoreductase activity, acting on s	lipoxygenase [EC:1.13.11.12]	Lipoxygenase	TRINITY_DN6888_c0_g1	FvH4_3g11300.1	11.2487	43.4895	32.2407	3.86616	0.00269989	0.347289	reticuline oxidase-like protein \\ 0.00E+00 \\ 91.60 % \\ GO:0071949-IEA;GO:0003824-IEA;GO:0016491-IEA;GO:0050660-IEA;GO:0055114-IEA;GO:0050328-IEA \\ FAD binding-IEA;catalytic activity-IEA;oxidoreductase activity-IEA;flavin adenine dinucleotide binding-I		FAD linked oxidase, N-terminal
TRINITY_DN8434_c0_g1	FvH4_2g06670.1	6.7275	30.8885	24.161	4.59138	0.00048956	0.130016	probable membrane-associated kinase regulator 3 \\ 0.00E+00 \\ 71.64 %		Protein of unknown function DUF688	TRINITY_DN264381_c0_g1	FvH4_3g20710.1	0.68425	2.6365	1.95225	3.85312	0.00739505	0.585043	PREDICTED: uncharacterized protein LOC105350158
TRINITY_DN942_c0_g3	FvH4_c3g00090.1	132.492	606.829	474.337	4.58013	0.0363848	1	Photosystem II protein D1 \\ 2.80E-84 \\ 84.55 % \\ GO:0009507-IEA;GO:0005739-IEA;GO:0045156-IEA;GO:0009772-IEA;GO:0016020-IEA;GO:0019684-IEA;GO:0016021-IEA;GO:0005524-IEA;GO:0009536-IEA \\ chloroplast-IEA;mitochondrion-IEA;electron transporter, transferr			TRINITY_DN11114_c0_g1	FvH4_5g36850.1	2.35025	9.0145	6.66425	3.83555	0.0378143	1	protein EXORDIUM-like 2 \\ 0.00E+00 \\ 85.75 % \\ GO:0005506-IEA;GO:0016491-IEA;GO:0016705-IEA;GO:0046872-IEA;GO:0016020-IEA;GO:0016021-IEA;GO:0020037-IEA;GO:0055114-IEA;GO:0004497-IEA;GO:0036204-IEA \\ iron ion binding-IEA;oxidoreductase activity-IEA;oxi		Protein EXORDIUM-like
TRINITY_DN299500_c0_g1	FvH4_1g06030.1	0.46225	2.114	1.65175	4.57328	0.000767312	0.161576	43kDa postsynaptic protein \\ 8.00E-43 \\ 64.87 % \\ GO:0003677-IEA;GO:0007165-IEA;GO:0043531-IEA;GO:0015074-IEA;GO:0000943-IEA;GO:0016787-IEA;GO:0003676-IEA \\ DNA binding-IEA;signal transduction-IEA;ADP binding-IEA;DNA integration-IEA;retrotransposon nu		Zinc finger, RING-type	TRINITY_DN2413_c0_g2	FvH4_3g29510.1	4.35125	16.5565	12.2052	3.805	0.000273333	0.107132	serine acetyltransferase 1, chloroplastic \\ 0.00E+00 \\ 81.56 % \\ GO:0016746-IEA;GO:0005737-IEA;GO:0009001-IEA;GO:0016740-IEA;GO:0006535-IEA \\ transferase activity, transferring acyl groups-IEA;cytoplasm-IEA;serine O-acetyltransferase activity-IEA;tran	serine O-acetyltransferase [EC:2.3.1.30]	Hexapeptide repeat
TRINITY_DN10944_c0_g1	FvH4_4g22330.1	1.10375	5.04325	3.9395	4.5692	5.88148e-05	0.0402744	nudix hydrolase 12, mitochondrial-like isoform X1 \\ 2.40E-73 \\ 83.45 % \\ GO:0016787-IEA \\ hydrolase activity-IEA \\ GO:0016787 \\ hydrolase activity	diphosphoinositol-polyphosphate diphosphatase [EC:3.6.1.52]	NUDIX hydrolase domain	TRINITY_DN222_c0_g1	FvH4_1g17620.1	1.44825	5.50775	4.0595	3.80304	3.65872e-05	0.0404873	calcium-transporting ATPase 2, plasma membrane-type-like \\ 0.00E+00 \\ 94.85 % \\ GO:0000166-IEA;GO:0005516-IEA;GO:0016020-IEA;GO:0006816-IEA;GO:0016021-IEA;GO:0005388-IEA;GO:0070588-IEA;GO:0006811-IEA;GO:0016787-IEA;GO:0005524-IEA;GO:0099132-IEA \\ nucl	Ca2+-transporting ATPase [EC:3.6.3.8]	P-type ATPase
TRINITY_DN2413_c0_g2	FvH4_3g29510.1	3.627	16.5565	12.9295	4.56479	0.000157348	0.0683481	serine acetyltransferase 1, chloroplastic \\ 0.00E+00 \\ 81.56 % \\ GO:0016746-IEA;GO:0005737-IEA;GO:0009001-IEA;GO:0016740-IEA;GO:0006535-IEA \\ transferase activity, transferring acyl groups-IEA;cytoplasm-IEA;serine O-acetyltransferase activity-IEA;tran	serine O-acetyltransferase [EC:2.3.1.30]	Hexapeptide repeat	TRINITY_DN4532_c0_g1	FvH4_3g20260.1	3.5725	13.5732	10.0008	3.79937	0.0266063	1	hypothetical protein RchiOBHm_Chr5g0034151
TRINITY_DN990_c0_g1	FvH4_7g23160.1	9.0205	40.9967	31.9762	4.54484	0.000632081	0.147743	wall-associated receptor kinase-like 20 \\ 0.00E+00 \\ 92.43 % \\ GO:0016020-IEA;GO:0016021-IEA;GO:0016310-IEA;GO:0004672-IEA;GO:0016740-IEA;GO:0030247-IEA;GO:0016301-IEA;GO:0005524-IEA;GO:0006468-IEA \\ membrane-IEA;integral component of membrane-IEA;pho		Protein kinase domain	TRINITY_DN12655_c0_g1	FvH4_2g02860.1	1.02575	3.89225	2.8665	3.79454	0.031825	1	pathogenesis-related protein 1-like \\ 1.70E-12 \\ 82.97 % \\ GO:0008152-IEA;GO:0004338-IEA;GO:0009277-IBA;GO:0009986-IBA;GO:0042124-IBA;GO:0016740-IEA;GO:0042973-IBA;GO:0005576-IBA;GO:0016798-IEA;GO:0016787-IEA \\ metabolic process-IEA;glucan exo-1,3-bet		Cysteine-rich secretory protein, allergen V5/Tpx-1-related
TRINITY_DN4036_c0_g2	FvH4_7g26030.1	9.328	41.9997	32.6718	4.50255	7.87081e-05	0.0471883	probable WRKY transcription factor 70 \\ 0.00E+00 \\ 96.19 % \\ GO:0008270-IEA;GO:0016491-IEA;GO:0046872-IEA;GO:0055114-IEA;GO:0008643-IEA \\ zinc ion binding-IEA;oxidoreductase activity-IEA;metal ion binding-IEA;oxidation-reduction process-IEA;carbohydra		WRKY domain	TRINITY_DN24682_c0_g1	FvH4_4g35790.1	5.38225	20.274	14.8918	3.76683	0.00433947	0.444288	7-deoxyloganetin glucosyltransferase-like \\ 0.00E+00 \\ 82.48 % \\ GO:0016757-IEA;GO:0016758-IEA;GO:0102360-IEA;GO:0102425-IEA;GO:0047893-IEA;GO:0016740-IEA \\ transferase activity, transferring glycosyl groups-IEA;transferase activity, transferring hexo	7-deoxyloganetin glucosyltransferase [EC:2.4.1.324]	UDP-glucuronosyl/UDP-glucosyltransferase
TRINITY_DN3471_c0_g1	FvH4_1g03650.1	4.14775	18.6163	14.4685	4.48828	0.00023477	0.0864105	pentatricopeptide repeat-containing protein At1g08070, chloroplastic \\ 9.10E-129 \\ 82.25 % \\ GO:0008270-IEA \\ zinc ion binding-IEA \\ GO:0008270 \\ zinc ion binding		Protein of unknown function DUF1677, Oryza sativa	TRINITY_DN4982_c0_g1	FvH4_4g26240.1	1.92075	7.23175	5.311	3.76507	0.00243936	0.328436	epoxide hydrolase 4-like		Alpha/beta hydrolase fold-1
TRINITY_DN1694_c0_g1	FvH4_6g44110.1	0.4515	2.0185	1.567	4.47065	0.000126048	0.0598329	kinase RLK-Pelle-DLSV family \\ 8.60E-10 \\ 69.09 % \\ GO:0000166-IEA;GO:0048544-IEA;GO:0016020-IEA;GO:0016021-IEA;GO:0016310-IEA;GO:0004672-IEA;GO:0016740-IEA;GO:0016301-IEA;GO:0004674-IEA;GO:0030246-IEA;GO:0005524-IEA;GO:0006468-IEA \\ nucleotide bindin		Protein kinase domain	TRINITY_DN2714_c0_g1	FvH4_4g33890.1	31.7022	119.35	87.648	3.76472	0.000840982	0.186238	protein PLANT CADMIUM RESISTANCE 2-like \\ 1.60E-18 \\ 54.55 %		PLAC8 motif-containing protein
TRINITY_DN77170_c0_g2	FvH4_5g09520.1	0.88825	3.96625	3.078	4.46524	5.09843e-05	0.0372375	ethylene-responsive transcription factor ERF114-like \\ 1.40E-149 \\ 88.82 % \\ GO:0003677-IEA;GO:0003700-IEA;GO:0006351-IEA;GO:0046983-IEA;GO:0006355-IEA;GO:0000977-IEA;GO:0005634-IEA;GO:0045944-IEA \\ DNA binding-IEA;DNA-binding transcription factor act		AP2/ERF domain	TRINITY_DN4536_c0_g1	FvH4_1g05040.1	15.5375	58.4935	42.956	3.76467	0.00175266	0.274602	putative arabinogalactan peptide, AGP \\ 6.80E-62 \\ 83.16 % \\ GO:0007165-IEA;GO:0016020-IEA;GO:0016021-IEA;GO:0043531-IEA;GO:0016787-IEA \\ signal transduction-IEA;membrane-IEA;integral component of membrane-IEA;ADP binding-IEA;hydrolase activity-IEA \\
TRINITY_DN79574_c0_g1	FvH4_7g26240.1	5.55725	24.8138	19.2565	4.46511	0.0113251	0.702726	60S ribosomal protein L10	large subunit ribosomal protein L10e	Ribosomal protein L10e	TRINITY_DN9963_c0_g1	FvH4_5g17690.1	9.87875	36.918	27.0392	3.73711	0.00438514	0.445871	mitogen-activated protein kinase kinase 9-like \\ 1.10E-142 \\ 64.63 % \\ GO:0008233-IEA;GO:0071586-IEA;GO:0006508-IEA;GO:0008237-IEA;GO:0004222-IEA;GO:0016787-IEA \\ peptidase activity-IEA;CAAX-box protein processing-IEA;proteolysis-IEA;metallopeptidase	mitogen-activated protein kinase kinase 9 [EC:2.7.12.2]	Protein kinase domain
TRINITY_DN20860_c0_g1	FvH4_4g06590.1	0.2495	1.11125	0.86175	4.45391	0.00480135	0.438551	homeobox-leucine zipper protein HAT22-like \\ 5.60E-147 \\ 81.81 % \\ GO:0006890-IEA;GO:0016020-IEA;GO:0006508-IEA;GO:0016021-IEA;GO:0004252-IEA;GO:0016874-IEA \\ retrograde vesicle-mediated transport, Golgi to ER-IEA;membrane-IEA;proteolysis-IEA;integral		Homeobox domain	TRINITY_DN234455_c0_g1	FvH4_7g28860.1	4.116	15.2995	11.1835	3.71708	8.95799e-05	0.0598855	LysM domain containing protein		LysM domain superfamily
TRINITY_DN8837_c0_g1	FvH4_7g24150.1	5.9305	26.3768	20.4462	4.44764	0.013827	0.78563	nematode resistance protein-like HSPRO2 \\ 0.00E+00 \\ 82.33 % \\ GO:0055085-IEA;GO:0016020-IEA;GO:0016021-IEA;GO:0016310-IEA;GO:0016301-IEA \\ transmembrane transport-IEA;membrane-IEA;integral component of membrane-IEA;phosphorylation-IEA;kinase activity		Hs1pro-1, C-terminal	TRINITY_DN8465_c0_g1	FvH4_6g16630.1	0.52525	1.9485	1.42325	3.70966	1.86435e-05	0.0299651	protein NUCLEAR FUSION DEFECTIVE 4-like \\ 0.00E+00 \\ 86.72 % \\ GO:0055085-IEA;GO:0016020-IEA;GO:0016021-IEA \\ transmembrane transport-IEA;membrane-IEA;integral component of membrane-IEA \\ GO:0016021;GO:0055085 \\ integral component of membrane;transm		Nodulin-like
TRINITY_DN2295_c0_g1	FvH4_4g02850.1	44.098	194.795	150.697	4.41731	0.0211976	0.989448	glu S.griseus protease inhibitor-like \\ 7.20E-36 \\ 63.34 % \\ GO:0005768-IEA;GO:0005802-IEA;GO:0001888-IEA;GO:0052541-IEA;GO:0016020-IEA;GO:0016021-IEA;GO:0016740-IEA;GO:0010401-IEA;GO:0010087-IEA;GO:0016757-IEA;GO:0005794-IEA;GO:0006486-IEA;GO:0009737-		Proteinase inhibitor I13, potato inhibitor I	TRINITY_DN22388_c0_g2	FvH4_4g03610.1	6.788	25.146	18.358	3.70448	0.000175135	0.0848329	myb-related protein Myb4-like \\ 6.40E-91 \\ 73.96 % \\ GO:0003677-IEA;GO:0016020-IEA;GO:0016021-IEA;GO:0044212-IBA;GO:0030154-IBA;GO:0043565-IBA;GO:0005634-IBA \\ DNA binding-IEA;membrane-IEA;integral component of membrane-IEA;transcription regulatory re	transcription factor MYB, plant	SANT/Myb domain
TRINITY_DN7683_c0_g1	FvH4_4g23360.1	1.18875	5.247	4.05825	4.41388	0.000968469	0.184057	zinc finger E-box-binding homeobox 1		Domain of unknown function DUF4408	TRINITY_DN14831_c0_g2	FvH4_4g27590.1	1.72125	6.37025	4.649	3.70094	0.000118748	0.0694171	ACD11 homolog protein \\ 0.00E+00 \\ 79.94 % \\ GO:0008152-IEA;GO:0016020-IEA;GO:0016021-IEA;GO:0004553-IEA;GO:0005975-IEA;GO:0016787-IEA;GO:0016798-IEA \\ metabolic process-IEA;membrane-IEA;integral component of membrane-IEA;hydrolase activity, hydrolyzi		Glycolipid transfer protein domain
TRINITY_DN224_c0_g2	FvH4_3g17480.1	68.6865	302.096	233.41	4.39819	0.000852631	0.171303	alpha-amylase/subtilisin inhibitor-like \\ 0.00E+00 \\ 73.36 % \\ GO:0048046-IEA;GO:0005618-IEA;GO:0071555-IEA;GO:0016740-IEA;GO:0016762-IEA;GO:0016798-IEA;GO:0016787-IEA;GO:0010411-IEA;GO:0008152-IEA;GO:0006073-IEA;GO:0016757-IEA;GO:0005576-IEA;GO:000455		Proteinase inhibitor I3, Kunitz legume	TRINITY_DN2180_c0_g1	FvH4_3g19390.1	0.53325	1.967	1.43375	3.6887	5.93787e-05	0.0507847	L-type lectin-domain containing receptor kinase IX.1-like \\ 0.00E+00 \\ 80.03 % \\ GO:0004601-IEA;GO:0016020-IEA;GO:0016021-IEA;GO:0055114-IEA;GO:0004672-IEA;GO:0016740-IEA;GO:0098869-IEA;GO:0030246-IEA;GO:0005524-IEA;GO:0006468-IEA \\ peroxidase activit		Protein kinase domain
TRINITY_DN7349_c0_g1	FvH4_1g19200.1	0.6575	2.88675	2.22925	4.39049	0.00257844	0.314702	probable rhamnogalacturonate lyase B \\ 0.00E+00 \\ 81.26 % \\ GO:0003824-IEA;GO:0016020-IEA;GO:0016829-IEA;GO:0016021-IEA;GO:0030246-IEA;GO:0005975-IEA;GO:0102210-IEA \\ catalytic activity-IEA;membrane-IEA;lyase activity-IEA;integral component of membran	rhamnogalacturonan endolyase [EC:4.2.2.23]	Galactose-binding-like domain superfamily	TRINITY_DN142_c3_g1	FvH4_4g25390.1	4.271	15.734	11.463	3.68391	0.00012841	0.0714065	putative 4-hydroxyphenylacetaldehyde oxime monooxygenase \\ 0.00E+00 \\ 85.88 % \\ GO:0005506-IEA;GO:0046872-IEA;GO:0016705-IEA;GO:0016491-IEA;GO:0016020-IEA;GO:0016021-IEA;GO:0020037-IEA;GO:0055114-IEA;GO:0004497-IEA \\ iron ion binding-IEA;metal ion bin		Cytochrome P450
TRINITY_DN4641_c0_g1	FvH4_3g20170.1	0.84275	3.67825	2.8355	4.36458	0.00657191	0.517407	dynein light chain, cytoplasmic-like \\ 0.00E+00 \\ 74.46 % \\ GO:0030749-IEA;GO:0008168-IEA;GO:0016740-IEA;GO:0032259-IEA \\ loganate O-methyltransferase activity-IEA;methyltransferase activity-IEA;transferase activity-IEA;methylation-IEA \\ GO:0030749;G		Dynein light chain, type 1/2	TRINITY_DN4436_c0_g2	FvH4_7g26560.1	1.06475	3.8965	2.83175	3.65954	0.000262142	0.10488	LRR receptor-like serine/threonine-protein kinase GSO1 isoform X2 \\ 0.00E+00 \\ 71.07 % \\ GO:0016020-IEA;GO:0016021-IEA \\ membrane-IEA;integral component of membrane-IEA \\ GO:0016020 \\ membrane		Leucine-rich repeat
TRINITY_DN32_c1_g2	FvH4_3g29740.1	18.934	82.6072	63.6732	4.36291	7.55687e-05	0.0461843	pleiotropic drug resistance protein 2-like \\ 0.00E+00 \\ 93.43 % \\ GO:0000166-IEA;GO:0016020-IEA;GO:0016021-IEA;GO:0042908-IEA;GO:0102026-IEA;GO:0016787-IEA;GO:0016887-IEA;GO:0015623-IEA;GO:0015688-IEA;GO:0055085-IEA;GO:0008559-IEA;GO:0006855-IEA;GO:000		ABC transporter-like	TRINITY_DN16311_c0_g1	FvH4_6g09300.1	2.19275	8.021	5.82825	3.65796	0.0137874	0.81781	probable calcium-binding protein CML43		EF-hand domain
TRINITY_DN1290_c2_g1	FvH4_4g11780.1	2.7885	12.1435	9.355	4.35485	0.000498924	0.131258	UDP-glycosyltransferase 92A1-like \\ 0.00E+00 \\ 82.33 % \\ GO:0016757-IEA;GO:0016758-IEA;GO:0016740-IEA \\ transferase activity, transferring glycosyl groups-IEA;transferase activity, transferring hexosyl groups-IEA;transferase activity-IEA \\ GO:0016758		UDP-glucuronosyl/UDP-glucosyltransferase	TRINITY_DN44_c0_g1	FvH4_4g32950.1	102.676	375.069	272.393	3.65295	0.000447029	0.137982	ATP-citrate synthase alpha chain protein 1 \\ 0.00E+00 \\ 97.23 % \\ GO:0016746-IEA;GO:0003878-IEA;GO:0003878-IBA;GO:0006085-IBA;GO:0005829-IBA;GO:0009346-IBA;GO:0016740-IEA;GO:0005524-IEA;GO:0006633-IBA \\ transferase activity, transferring acyl groups-I	ATP citrate (pro-S)-lyase [EC:2.3.3.8]	ATP-grasp fold, succinyl-CoA synthetase-type
TRINITY_DN7730_c0_g1	FvH4_5g02720.1	5.316	23.1152	17.7993	4.34824	1.18994e-05	0.0201682	hydroxyproline-rich glycoprotein family protein \\ 0.00E+00 \\ 79.80 %			TRINITY_DN7789_c0_g1	FvH4_3g16760.1	5.91525	21.5885	15.6732	3.64963	0.00179448	0.277421	gibberellin 2-beta-dioxygenase 1-like \\ 2.00E-168 \\ 85.49 % \\ GO:0052634-IBA;GO:0051213-IEA;GO:0051213-IBA;GO:0016491-IEA;GO:0046872-IEA;GO:0045487-IBA;GO:0055114-IEA;GO:0045543-IEA;GO:0009686-IBA \\ C-19 gibberellin 2-beta-dioxygenase activity-IBA;dio	gibberellin 2-oxidase [EC:1.14.11.13]	Oxoglutarate/iron-dependent dioxygenase
TRINITY_DN4694_c1_g1	FvH4_3g08740.1	1.22025	5.30525	4.085	4.34767	0.000304705	0.0995434	MACPF domain-containing protein NSL1 \\ 0.00E+00 \\ 87.44 % \\ GO:0006955-IBA;GO:0009626-IBA;GO:0005886-IBA \\ immune response-IBA;plant-type hypersensitive response-IBA;plasma membrane-IBA \\ GO:0005886;GO:0009626 \\ plasma membrane;plant-type hypersensi		Membrane attack complex component/perforin (MACPF) domain	TRINITY_DN22418_c0_g1	FvH4_6g29770.1	5.398	19.6713	14.2733	3.64417	0.000775424	0.178139	cucumber peeling cupredoxin-like		Phytocyanin domain
TRINITY_DN18742_c0_g1	FvH4_2g09320.1	0.7435	3.23025	2.48675	4.34465	0.00111238	0.198776	---NA---			TRINITY_DN15361_c0_g1	FvH4_6g06470.1	0.40925	1.486	1.07675	3.63103	0.00352661	0.397092	luminal-binding protein 5-like \\ 0.00E+00 \\ 93.97 % \\ GO:0000166-IEA;GO:0009860-IEA;GO:0016592-IEA;GO:0005524-IEA \\ nucleotide binding-IEA;pollen tube growth-IEA;mediator complex-IEA;ATP binding-IEA \\ GO:0005524;GO:0009860;GO:0016592 \\ ATP binding;p	heat shock 70kDa protein 5	Heat shock protein 70 family
TRINITY_DN23699_c0_g1	FvH4_3g03610.1	5.10325	22.1632	17.06	4.34297	6.8313e-05	0.0438546	calcium-binding protein PBP1-like \\ 0.00E+00 \\ 93.16 % \\ GO:0003756-IEA;GO:0003756-IBA;GO:0045454-IEA;GO:0005783-IEA;GO:0005783-IBA;GO:0005623-IEA;GO:0016853-IEA;GO:0005788-IEA;GO:0034976-IBA;GO:0006457-IBA \\ protein disulfide isomerase activity-IEA;p		EF-hand domain	TRINITY_DN10410_c0_g1	FvH4_1g20220.1	8.60825	31.2458	22.6375	3.62974	1.9607e-05	0.0309524	bifunctional riboflavin biosynthesis protein RIBA 1, chloroplastic-like \\ 0.00E+00 \\ 87.02 % \\ GO:0009570-IEA;GO:0009507-IEA;GO:0009507-IBA;GO:0003935-IEA;GO:0016020-IEA;GO:0009231-IEA;GO:0009231-IBA;GO:0016829-IEA;GO:0008686-IEA;GO:0008686-IBA;GO:0016	3,4-dihydroxy 2-butanone 4-phosphate synthase / GTP cyclohydrolase II [EC:4.1.99.12 3.5.4.25]	3,4-dihydroxy-2-butanone 4-phosphate synthase, RibB
TRINITY_DN15326_c0_g1	FvH4_7g10340.1	1.96925	8.55	6.58075	4.34175	0.0033545	0.359896	uclacyanin-3 \\ 0.00E+00 \\ 78.99 % \\ GO:0016020-IEA;GO:0016021-IEA;GO:0008289-IEA \\ membrane-IEA;integral component of membrane-IEA;lipid binding-IEA \\ GO:0008289 \\ lipid binding		Phytocyanin domain	TRINITY_DN1569_c0_g5	FvH4_6g23320.1	2.52775	9.14975	6.622	3.61972	0.0109859	0.720576	hypothetical protein RchiOBHm_Chr3g0481271 \\ 8.00E-53 \\ 87.86 %
TRINITY_DN2411_c0_g3	FvH4_c1g00650.1	0.4985	2.1635	1.665	4.34002	0.0363227	1	cytochrome c biogenesis C (mitochondrion) \\ 7.40E-129 \\ 91.21 % \\ GO:0015886-IEA;GO:0031966-IEA;GO:0005739-IEA;GO:0015232-IEA;GO:0016020-IEA;GO:0016021-IEA;GO:0020037-IEA;GO:0017004-IEA \\ heme transport-IEA;mitochondrial membrane-IEA;mitochondrion-IEA		Cytochrome c assembly protein	TRINITY_DN7810_c0_g1	FvH4_5g06700.1	7.659	27.71	20.051	3.61797	0.000178206	0.0857087	leucine-rich repeat receptor-like serine/threonine/tyrosine-protein kinase SOBIR1 \\ 0.00E+00 \\ 86.33 % \\ GO:0016020-IEA;GO:0016021-IEA;GO:0046777-IBA;GO:0016310-IEA;GO:0004672-IEA;GO:0004683-IEA;GO:0016740-IEA;GO:0016301-IEA;GO:0004674-IBA;GO:0005524-I		Protein kinase domain
TRINITY_DN2154_c0_g1	FvH4_5g23300.1	14.862	64.2137	49.3517	4.32067	1.50864e-05	0.0201682	phosphomevalonate kinase-like \\ 0.00E+00 \\ 91.25 % \\ GO:0010142-IBA;GO:0019287-IEA;GO:0019287-IBA;GO:0016310-IEA;GO:0016740-IEA;GO:0016301-IEA;GO:0004631-IEA;GO:0004631-IBA;GO:0005524-IEA;GO:0005777-IEA;GO:0005777-IBA \\ farnesyl diphosphate biosynthet	phosphomevalonate kinase [EC:2.7.4.2]	GHMP kinase N-terminal domain	TRINITY_DN3288_c0_g2	FvH4_3g17940.1	0.905	3.261	2.356	3.60331	5.70591e-05	0.0493975	probable LRR receptor-like serine/threonine-protein kinase At1g53430 isoform X1 \\ 0.00E+00 \\ 86.87 % \\ GO:0016020-IEA;GO:0016021-IEA;GO:0016310-IEA;GO:0004672-IEA;GO:0016740-IEA;GO:0016301-IEA;GO:0005524-IEA;GO:0006468-IEA \\ membrane-IEA;integral comp		Armadillo
TRINITY_DN9241_c0_g1	FvH4_2g36680.1	2.94975	12.7185	9.76875	4.31172	5.99631e-05	0.0408691	putative peptidyl-tRNA hydrolase PTRHD1 \\ 2.90E-110 \\ 85.44 % \\ GO:0004045-IEA;GO:0016787-IEA \\ aminoacyl-tRNA hydrolase activity-IEA;hydrolase activity-IEA \\ GO:0004045 \\ aminoacyl-tRNA hydrolase activity		Peptidyl-tRNA hydrolase, PTH2	TRINITY_DN995_c0_g1	FvH4_2g11020.1	2.3845	8.58425	6.19975	3.60002	1.79912e-05	0.0299651	glutamyl-tRNA reductase 2, chloroplastic-like \\ 0.00E+00 \\ 89.40 % \\ GO:0006779-IEA;GO:0016491-IEA;GO:0050661-IEA;GO:0055114-IEA;GO:0006782-IEA;GO:0033014-IEA;GO:0008883-IEA \\ porphyrin-containing compound biosynthetic process-IEA;oxidoreductase activ	glutamyl-tRNA reductase [EC:1.2.1.70]	Tetrapyrrole biosynthesis, glutamyl-tRNA reductase
TRINITY_DN14900_c0_g1	FvH4_3g18050.1	16.5775	71.4185	54.841	4.30816	0.000330689	0.103849	PREDICTED: uncharacterized protein LOC101310586 \\ 4.10E-04 \\ 72.97 % \\ GO:0016020-IEA;GO:0016021-IEA \\ membrane-IEA;integral component of membrane-IEA			TRINITY_DN7737_c0_g1	FvH4_6g05760.1	11.267	40.5475	29.2805	3.59878	6.88442e-05	0.0535577	peroxisomal adenine nucleotide carrier 1-like \\ 2.20E-173 \\ 91.56 % \\ GO:0055085-IEA;GO:0016020-IEA;GO:0016021-IEA;GO:0022857-IEA \\ transmembrane transport-IEA;membrane-IEA;integral component of membrane-IEA;transmembrane transporter activity-IEA \\ G		Mitochondrial carrier protein
TRINITY_DN3218_c0_g1	FvH4_7g04070.1	33.8773	145.665	111.788	4.29979	0.0179865	0.901363	probable carboxylesterase 15 \\ 0.00E+00 \\ 87.07 % \\ GO:0052689-IEA;GO:0016787-IEA \\ carboxylic ester hydrolase activity-IEA;hydrolase activity-IEA \\ GO:0052689 \\ carboxylic ester hydrolase activity		Alpha/beta hydrolase fold-3	TRINITY_DN1696_c0_g1	FvH4_6g32110.1	1.404	5.04575	3.64175	3.59384	8.77741e-05	0.0598242	putative disease resistance protein RGA3 \\ 0.00E+00 \\ 74.14 % \\ GO:0043531-IEA;GO:0016787-IEA \\ ADP binding-IEA;hydrolase activity-IEA \\ GO:0016787;GO:0043531 \\ hydrolase activity;ADP binding		NB-ARC
TRINITY_DN8438_c0_g1	FvH4_2g35010.1	1.7215	7.399	5.6775	4.298	0.00939617	0.63438	transcription factor MYB44-like \\ 0.00E+00 \\ 86.82 % \\ GO:0000166-IEA;GO:0046872-IEA;GO:0120029-IEA;GO:0016020-IEA;GO:0016021-IEA;GO:0008553-IEA;GO:0006811-IEA;GO:0005524-IEA;GO:0016787-IEA;GO:0005886-IEA \\ nucleotide binding-IEA;metal ion binding-IEA		SANT/Myb domain	TRINITY_DN3881_c0_g1	FvH4_2g29860.1	0.5565	1.99425	1.43775	3.58356	0.00272692	0.348278	PREDICTED: uncharacterized protein LOC101297404 \\ 1.50E-61 \\ 60.99 %
TRINITY_DN326827_c0_g1	FvH4_3g03600.1	1.32325	5.686	4.36275	4.297	0.000352632	0.10737	calcium-binding protein PBP1-like \\ 6.60E-33 \\ 62.17 %			TRINITY_DN2241_c1_g3	FvH4_5g30330.1	2.2345	8.00675	5.77225	3.58324	7.37097e-05	0.05525	GTP 3',8-cyclase, mitochondrial \\ 2.70E-11 \\ 89.74 %		MoaA/nifB/pqqE, iron-sulphur binding, conserved site
TRINITY_DN9137_c0_g1	FvH4_3g35700.1	0.4055	1.74125	1.33575	4.29408	0.00637397	0.508186	TMV resistance protein N-like \\ 6.40E-163 \\ 75.24 % \\ GO:0007165-IEA;GO:0016020-IEA;GO:0016021-IEA;GO:0043531-IEA;GO:0006334-IEA;GO:0016787-IEA;GO:0005634-IEA \\ signal transduction-IEA;membrane-IEA;integral component of membrane-IEA;ADP binding-IEA;nu		Toll/interleukin-1 receptor homology (TIR) domain	TRINITY_DN2154_c0_g1	FvH4_5g23300.1	18.0008	64.2137	46.213	3.56728	2.48796e-05	0.033765	phosphomevalonate kinase-like \\ 0.00E+00 \\ 91.25 % \\ GO:0010142-IBA;GO:0019287-IEA;GO:0019287-IBA;GO:0016310-IEA;GO:0016740-IEA;GO:0016301-IEA;GO:0004631-IEA;GO:0004631-IBA;GO:0005524-IEA;GO:0005777-IEA;GO:0005777-IBA \\ farnesyl diphosphate biosynthet	phosphomevalonate kinase [EC:2.7.4.2]	GHMP kinase N-terminal domain
TRINITY_DN21511_c0_g1	FvH4_2g05060.1	0.52075	2.22525	1.7045	4.27316	8.76525e-05	0.0501944	putative UDP-glucose glucosyltransferase \\ 0.00E+00 \\ 88.97 % \\ GO:0016757-IEA;GO:0016758-IEA;GO:0016740-IEA \\ transferase activity, transferring glycosyl groups-IEA;transferase activity, transferring hexosyl groups-IEA;transferase activity-IEA \\ GO:		UDP-glucuronosyl/UDP-glucosyltransferase	TRINITY_DN1769_c0_g1	FvH4_2g05690.1	2.069	7.3695	5.3005	3.56187	0.000480844	0.142533	UDP-glucose flavonoid 3-O-glucosyltransferase 7-like \\ 0.00E+00 \\ 87.40 % \\ GO:0016757-IEA;GO:0016758-IEA;GO:0102360-IEA;GO:0102425-IEA;GO:0047893-IEA;GO:0016740-IEA \\ transferase activity, transferring glycosyl groups-IEA;transferase activity, transf	abscisate beta-glucosyltransferase [EC:2.4.1.263]	UDP-glucuronosyl/UDP-glucosyltransferase
TRINITY_DN5024_c2_g1	FvH4_c1g00580.1	1.5155	6.47425	4.95875	4.27202	0.0320406	1	ATPase subunit 6 (mitochondrion) \\ 5.90E-122 \\ 95.80 % \\ GO:0045263-IEA;GO:0005739-IEA;GO:0015078-IEA;GO:0016020-IEA;GO:0016021-IEA;GO:0006811-IEA;GO:0015986-IEA;GO:0005743-IEA;GO:0006754-IEA \\ proton-transporting ATP synthase complex, coupling factor	F-type H+-transporting ATPase subunit a	ATP synthase, F0 complex, subunit A	TRINITY_DN2647_c0_g1	FvH4_2g40390.1	3.521	12.5217	9.00075	3.55631	3.68939e-05	0.0404873	protein DA1 \\ 0.00E+00 \\ 88.58 % \\ GO:0046872-IEA \\ metal ion binding-IEA \\ GO:0046872 \\ metal ion binding		Zinc finger, LIM-type
TRINITY_DN6776_c0_g1	FvH4_2g25570.1	2.5865	11.0395	8.453	4.26812	2.5078e-05	0.0246879	ABC transporter C family member 14-like \\ 0.00E+00 \\ 90.87 % \\ GO:0042626-IEA;GO:0000166-IEA;GO:0055085-IEA;GO:0016020-IEA;GO:0016021-IEA;GO:0005524-IEA;GO:0016887-IEA \\ ATPase activity, coupled to transmembrane movement of substances-IEA;nucleotide b		ABC transporter-like	TRINITY_DN4712_c0_g1	FvH4_3g11580.1	366.046	1299.01	932.964	3.54876	1.45264e-05	0.0272875	beta-amyrin 28-oxidase-like \\ 0.00E+00 \\ 92.66 % \\ GO:0005506-IEA;GO:0046872-IEA;GO:0016491-IEA;GO:0016705-IEA;GO:0020037-IEA;GO:0055114-IEA;GO:0004497-IEA \\ iron ion binding-IEA;metal ion binding-IEA;oxidoreductase activity-IEA;oxidoreductase activit	beta-amyrin 28-monooxygenase [EC:1.14.13.201]	Cytochrome P450
TRINITY_DN12548_c1_g1	FvH4_6g39330.1	0.654	2.7855	2.1315	4.25917	0.0130931	0.762639	putative UDP-glucose flavonoid 3-O-glucosyltransferase 3 \\ 4.70E-14 \\ 80.78 % \\ GO:0046907-IBA;GO:0016020-IEA;GO:0016021-IEA;GO:0009306-IBA;GO:0005622-IEA \\ intracellular transport-IBA;membrane-IEA;integral component of membrane-IEA;protein secretion-		UDP-glucuronosyl/UDP-glucosyltransferase	TRINITY_DN12723_c0_g1	FvH4_4g36960.1	4.24275	15.0475	10.8047	3.54664	0.00246028	0.329539	endochitinase A \\ 8.20E-49 \\ 85.38 % \\ GO:0016020-IEA;GO:0016021-IEA;GO:0005886-IEA \\ membrane-IEA;integral component of membrane-IEA;plasma membrane-IEA \\ GO:0005886;GO:0016021 \\ plasma membrane;integral component of membrane
TRINITY_DN1526_c0_g1	FvH4_5g03210.1	0.50025	2.12575	1.6255	4.24938	0.000897123	0.176261	probable WRKY transcription factor 29 isoform X1 \\ 2.50E-15 \\ 89.14 % \\ GO:0003700-IEA;GO:0006355-IEA \\ DNA-binding transcription factor activity-IEA;regulation of transcription, DNA-templated-IEA \\ GO:0003700;GO:0006355 \\ DNA-binding transcription		WRKY domain	TRINITY_DN3476_c0_g1	FvH4_5g36910.1	4.986	17.6755	12.6895	3.54503	0.000136856	0.0740971	protein EXORDIUM-like \\ 0.00E+00 \\ 93.76 %		Protein EXORDIUM-like
TRINITY_DN2072_c1_g2	FvH4_2g40740.1	0.8155	3.4645	2.649	4.24831	3.98244e-05	0.032117	mitogen-activated protein kinase kinase kinase YODA-like \\ 0.00E+00 \\ 72.54 % \\ GO:0000165-IEA;GO:0000186-IEA;GO:0004709-IEA;GO:0016310-IEA;GO:0016740-IEA;GO:0004672-IEA;GO:0016301-IEA;GO:0005524-IEA;GO:0006468-IEA;GO:0005622-IEA \\ MAPK cascade-IEA;ac		Protein kinase domain	TRINITY_DN17752_c0_g1	FvH4_3g19740.1	0.77575	2.74275	1.967	3.53561	0.00182844	0.280027	lactoylglutathione lyase GLX1-like \\ 1.40E-11 \\ 52.89 %	lactoylglutathione lyase [EC:4.4.1.5]	Glyoxalase/fosfomycin resistance/dioxygenase domain
TRINITY_DN1316_c0_g1	FvH4_1g12290.1	3.35375	14.1555	10.8018	4.2208	0.000569489	0.141491	---NA--- \\ 1.40E-126 \\ 61.29 % \\ GO:0016310-IEA;GO:0016301-IEA \\ phosphorylation-IEA;kinase activity-IEA			TRINITY_DN9750_c0_g1	FvH4_3g37560.1	0.39675	1.40225	1.0055	3.53434	0.00180812	0.278653	serpin-ZX \\ 0.00E+00 \\ 81.58 % \\ GO:0045735-IEA \\ nutrient reservoir activity-IEA \\ GO:0045735 \\ nutrient reservoir activity		Serpin family
TRINITY_DN17106_c0_g2	FvH4_6g10350.1	0.8955	3.7745	2.879	4.21496	0.00390179	0.391157	protein LURP-one-related 10-like \\ 0.00E+00 \\ 77.27 % \\ GO:0007165-IEA;GO:0043531-IEA;GO:0016787-IEA \\ signal transduction-IEA;ADP binding-IEA;hydrolase activity-IEA \\ GO:0007165;GO:0016787;GO:0043531 \\ signal transduction;hydrolase activity;ADP bin		LURP-one-related	TRINITY_DN1987_c0_g1	FvH4_2g27000.1	2.93525	10.364	7.42875	3.53087	0.00595418	0.521136	chlorophyllide a oxygenase, chloroplastic \\ 0.00E+00 \\ 92.80 % \\ GO:0005506-IEA;GO:0051213-IEA;GO:0016491-IEA;GO:0055114-IEA;GO:0051537-IEA;GO:0010277-IEA \\ iron ion binding-IEA;dioxygenase activity-IEA;oxidoreductase activity-IEA;oxidation-reduction	chlorophyllide a oxygenase [EC:1.14.13.122]	Pheophorbide a oxygenase
TRINITY_DN379_c0_g2	FvH4_3g35020.1	2.04325	8.60025	6.557	4.2091	0.00286922	0.330675	zinc finger protein ZAT12-like \\ 1.90E-66 \\ 91.18 % \\ GO:0003735-IBA;GO:0022627-IBA;GO:0000028-IBA;GO:0005840-IEA \\ structural constituent of ribosome-IBA;cytosolic small ribosomal subunit-IBA;ribosomal small subunit assembly-IBA;ribosome-IEA \\ GO:00		Zinc finger C2H2-type	TRINITY_DN819_c0_g2	FvH4_2g39130.1	5.29275	18.6465	13.3537	3.52303	0.00402259	0.424687	aldehyde oxidase GLOX-like \\ 0.00E+00 \\ 89.83 % \\ GO:0045480-IEA;GO:0016491-IEA;GO:0055114-IEA \\ galactose oxidase activity-IEA;oxidoreductase activity-IEA;oxidation-reduction process-IEA \\ GO:0045480;GO:0055114 \\ galactose oxidase activity;oxidatio	glyoxal/methylglyoxal oxidase [EC:1.2.3.15]	Glyoxal oxidase, N-terminal
TRINITY_DN425_c0_g4	FvH4_5g26740.1	1.258	5.28625	4.02825	4.20211	0.00186492	0.266464	protein LYK5 \\ 0.00E+00 \\ 72.56 % \\ GO:0016020-IEA;GO:0016021-IEA;GO:0016310-IEA;GO:0004672-IEA;GO:0016740-IEA;GO:0016301-IEA;GO:0005524-IEA;GO:0006468-IEA \\ membrane-IEA;integral component of membrane-IEA;phosphorylation-IEA;protein kinase activity-I		Protein kinase domain	TRINITY_DN125_c0_g2	FvH4_1g25150.1	13.014	45.783	32.769	3.51798	0.00011949	0.0695863	NAC domain-containing protein 2-like \\ 4.00E-104 \\ 92.64 % \\ GO:0003677-IEA;GO:0006355-IEA;GO:0005634-IEA \\ DNA binding-IEA;regulation of transcription, DNA-templated-IEA;nucleus-IEA \\ GO:0003677;GO:0005634;GO:0006355 \\ DNA binding;nucleus;regulatio		NAC domain
TRINITY_DN7810_c0_g1	FvH4_5g06700.1	6.6035	27.71	21.1065	4.19626	0.000131616	0.0613077	leucine-rich repeat receptor-like serine/threonine/tyrosine-protein kinase SOBIR1 \\ 0.00E+00 \\ 86.33 % \\ GO:0016020-IEA;GO:0016021-IEA;GO:0046777-IBA;GO:0016310-IEA;GO:0004672-IEA;GO:0004683-IEA;GO:0016740-IEA;GO:0016301-IEA;GO:0004674-IBA;GO:0005524-I		Protein kinase domain	TRINITY_DN2889_c0_g1	FvH4_1g09820.1	3.0295	10.6412	7.61175	3.51254	0.00059527	0.157103	probable L-type lectin-domain containing receptor kinase S.5 \\ 0.00E+00 \\ 81.51 % \\ GO:0004715-IEA;GO:0016020-IEA;GO:0016021-IEA;GO:0016310-IEA;GO:0016740-IEA;GO:0004672-IEA;GO:0016301-IEA;GO:0030246-IEA;GO:0005524-IEA;GO:0018108-IEA;GO:0006468-IEA \\		Protein kinase domain
TRINITY_DN11806_c0_g1	FvH4_3g13450.1	0.2815	1.165	0.8835	4.13854	0.000764004	0.161413	receptor-like protein 12 \\ 0.00E+00 \\ 73.68 % \\ GO:0016020-IEA;GO:0016021-IEA;GO:0016310-IEA;GO:0016740-IEA;GO:0016301-IEA;GO:0004674-IEA;GO:0006468-IEA \\ membrane-IEA;integral component of membrane-IEA;phosphorylation-IEA;transferase activity-IEA;kin		Leucine-rich repeat	TRINITY_DN13821_c0_g1	FvH4_6g29910.1	2.66375	9.343	6.67925	3.50746	0.00554103	0.501771	PREDICTED: uncharacterized protein LOC101299686 \\ 6.90E-125 \\ 58.83 % \\ GO:0016020-IEA;GO:0043386-IEA;GO:0016021-IEA \\ membrane-IEA;mycotoxin biosynthetic process-IEA;integral component of membrane-IEA \\ GO:0016021;GO:0043386 \\ integral component of
TRINITY_DN0_c8_g2	FvH4_6g41620.1	7.517	31.0607	23.5437	4.13207	0.0291012	1	hypothetical chloroplast RF1 (chloroplast) \\ 0.00E+00 \\ 97.05 % \\ GO:0009706-IEA;GO:0009507-IEA;GO:0016020-IEA;GO:0016021-IEA;GO:0015031-IEA;GO:0009528-IEA;GO:0009536-IEA \\ chloroplast inner membrane-IEA;chloroplast-IEA;membrane-IEA;integral component	NAD(P)H-quinone oxidoreductase subunit H [EC:1.6.5.3]	NADH-quinone oxidoreductase, subunit D	TRINITY_DN6280_c0_g1	FvH4_2g26080.1	32.6245	114.259	81.6345	3.50225	4.10835e-05	0.0420505	ethylene-responsive transcription factor ERF071	EREBP-like factor	AP2/ERF domain
TRINITY_DN350_c3_g1	FvH4_4g34370.1	5.3275	21.987	16.6595	4.12708	0.00303319	0.339039	DNA ligase 1 \\ 3.10E-102 \\ 81.07 % \\ GO:0016020-IEA;GO:0016021-IEA;GO:0016740-IEA \\ membrane-IEA;integral component of membrane-IEA;transferase activity-IEA \\ GO:0016021;GO:0016740 \\ integral component of membrane;transferase activity		Protein of unknown function DUF1645, plant	TRINITY_DN11013_c0_g1	FvH4_7g07900.1	33.9453	118.798	84.8525	3.49969	0.00101903	0.206063	protein NRT1/ PTR FAMILY 7.2-like \\ 0.00E+00 \\ 90.70 % \\ GO:0055085-IEA;GO:0016020-IEA;GO:0016021-IEA;GO:0022857-IEA \\ transmembrane transport-IEA;membrane-IEA;integral component of membrane-IEA;transmembrane transporter activity-IEA \\ GO:0016021;GO:		Proton-dependent oligopeptide transporter family
TRINITY_DN3356_c0_g3	FvH4_2g28560.1	0.7785	3.2025	2.424	4.11368	0.0146122	0.812121	orf198 (mitochondrion) \\ 1.00E-48 \\ 70.96 %			TRINITY_DN1504_c1_g2	FvH4_2g13190.1	2.5575	8.9325	6.375	3.49267	0.000937229	0.197432	phytosulfokine receptor 2 \\ 0.00E+00 \\ 68.21 % \\ GO:0003677-IEA;GO:0044212-IBA;GO:0030154-IBA;GO:0043565-IBA;GO:0005634-IBA \\ DNA binding-IEA;transcription regulatory region DNA binding-IBA;cell differentiation-IBA;sequence-specific DNA binding-IBA;nu		Protein kinase domain
TRINITY_DN2889_c0_g1	FvH4_1g09820.1	2.591	10.6412	8.05025	4.10701	0.000777019	0.162726	probable L-type lectin-domain containing receptor kinase S.5 \\ 0.00E+00 \\ 81.51 % \\ GO:0004715-IEA;GO:0016020-IEA;GO:0016021-IEA;GO:0016310-IEA;GO:0016740-IEA;GO:0004672-IEA;GO:0016301-IEA;GO:0030246-IEA;GO:0005524-IEA;GO:0018108-IEA;GO:0006468-IEA \\		Protein kinase domain	TRINITY_DN4036_c0_g2	FvH4_7g26030.1	12.0503	41.9997	29.9495	3.48538	0.000131647	0.0725405	probable WRKY transcription factor 70 \\ 0.00E+00 \\ 96.19 % \\ GO:0008270-IEA;GO:0016491-IEA;GO:0046872-IEA;GO:0055114-IEA;GO:0008643-IEA \\ zinc ion binding-IEA;oxidoreductase activity-IEA;metal ion binding-IEA;oxidation-reduction process-IEA;carbohydra		WRKY domain
TRINITY_DN972_c0_g2	FvH4_3g23080.1	0.49325	2.0215	1.52825	4.09833	3.33731e-06	0.0119549	probable F-box protein At4g22030 \\ 0.00E+00 \\ 75.23 % \\ GO:0016746-IEA;GO:0016020-IEA;GO:0016021-IEA;GO:0016740-IEA;GO:0016787-IEA;GO:0004742-IEA \\ transferase activity, transferring acyl groups-IEA;membrane-IEA;integral component of membrane-IEA;tran		Petal formation-expressed	TRINITY_DN12426_c0_g2	FvH4_5g08800.1	1.52225	5.295	3.77275	3.4784	0.0371415	1	putative small auxin-up RNA \\ 2.60E-92 \\ 76.83 % \\ GO:0055114-IEA;GO:0004497-IEA;GO:0005576-IEA;GO:0016787-IEA;GO:0005975-IEA;GO:0030248-IEA \\ oxidation-reduction process-IEA;monooxygenase activity-IEA;extracellular region-IEA;hydrolase activity-IEA;c		Small auxin-up RNA
TRINITY_DN4121_c0_g1	FvH4_7g04820.1	1.333	5.45375	4.12075	4.09134	0.00217427	0.287974	protein ZINC INDUCED FACILITATOR-LIKE 1-like isoform X1 \\ 0.00E+00 \\ 89.41 % \\ GO:0055085-IEA;GO:0016020-IEA;GO:0016021-IEA;GO:0005215-IEA \\ transmembrane transport-IEA;membrane-IEA;integral component of membrane-IEA;transporter activity-IEA \\ GO:000		Major facilitator superfamily	TRINITY_DN27360_c0_g1	FvH4_5g29050.1	1.961	6.8065	4.8455	3.47093	0.00312973	0.371521	U-box domain-containing protein 16 \\ 0.00E+00 \\ 88.04 % \\ GO:0016746-IEA;GO:0016740-IEA;GO:0016874-IEA;GO:0016567-IEA;GO:0004842-IEA \\ transferase activity, transferring acyl groups-IEA;transferase activity-IEA;ligase activity-IEA;protein ubiquitinati		Armadillo
TRINITY_DN3923_c2_g1	FvH4_4g15010.1	8.10475	33.1532	25.0485	4.0906	0.00129093	0.21532	2-hydroxyisoflavanone dehydratase-like \\ 0.00E+00 \\ 83.90 % \\ GO:0052689-IEA;GO:0016020-IEA;GO:0016021-IEA;GO:0016829-IEA;GO:0016787-IEA;GO:0033987-IEA \\ carboxylic ester hydrolase activity-IEA;membrane-IEA;integral component of membrane-IEA;lyase act		Alpha/beta hydrolase fold-3	TRINITY_DN10181_c0_g3	FvH4_7g17440.1	1.59925	5.53725	3.938	3.4624	0.000183551	0.0862485	3-ketoacyl-CoA synthase 1 \\ 0.00E+00 \\ 91.95 % \\ GO:0016746-IEA;GO:0016747-IEA;GO:0003824-IEA;GO:0016491-IEA;GO:0016020-IEA;GO:0016829-IEA;GO:0016021-IEA;GO:0055114-IEA;GO:0016740-IEA;GO:0006633-IEA \\ transferase activity, transferring acyl groups-IEA	3-ketoacyl-CoA synthase [EC:2.3.1.199]	Very-long-chain 3-ketoacyl-CoA synthase
TRINITY_DN1504_c1_g2	FvH4_2g13190.1	2.18625	8.9325	6.74625	4.08576	0.000629496	0.147351	phytosulfokine receptor 2 \\ 0.00E+00 \\ 68.21 % \\ GO:0003677-IEA;GO:0044212-IBA;GO:0030154-IBA;GO:0043565-IBA;GO:0005634-IBA \\ DNA binding-IEA;transcription regulatory region DNA binding-IBA;cell differentiation-IBA;sequence-specific DNA binding-IBA;nu		Protein kinase domain	TRINITY_DN253_c0_g1	FvH4_5g21040.1	52.2293	180.765	128.536	3.461	0.000282976	0.108929	dynamin-related protein 1E-like \\ 0.00E+00 \\ 92.51 % \\ GO:0000266-IBA;GO:0005525-IEA;GO:0000166-IEA;GO:0005737-IBA;GO:0003924-IEA;GO:0003924-IBA;GO:0016020-IBA;GO:0008017-IBA \\ mitochondrial fission-IBA;GTP binding-IEA;nucleotide binding-IEA;cytoplasm		Dynamin central domain
TRINITY_DN582_c0_g2	FvH4_6g04290.1	1.105	4.51325	3.40825	4.08439	0.00149658	0.236175	zinc finger protein CONSTANS-LIKE 1-like \\ 1.50E-121 \\ 86.04 % \\ GO:0048046-IEA;GO:0016020-IEA;GO:0016021-IEA;GO:0005576-IEA \\ apoplast-IEA;membrane-IEA;integral component of membrane-IEA;extracellular region-IEA \\ GO:0016021;GO:0048046 \\ integral c			TRINITY_DN3142_c0_g3	FvH4_4g09410.1	1.0255	3.5465	2.521	3.45831	0.00037688	0.125791	hydroxyproline O-galactosyltransferase GALT3 \\ 0.00E+00 \\ 91.25 % \\ GO:0016757-IEA;GO:0016020-IEA;GO:0016021-IEA;GO:0008378-IEA;GO:0000139-IEA;GO:0005783-IBA;GO:0006486-IEA;GO:0006486-IBA;GO:0016740-IEA;GO:0005794-IEA;GO:0005794-IBA \\ transferase acti		Glycosyl transferase, family 31
TRINITY_DN6479_c0_g1	FvH4_3g08420.1	1.5385	6.283	4.7445	4.08385	0.00511383	0.453635	PREDICTED: uncharacterized protein LOC101307761 \\ 2.70E-83 \\ 55.78 % \\ GO:0046872-IEA \\ metal ion binding-IEA		Protein of unknown function DUF599	TRINITY_DN1037_c0_g3	FvH4_7g27120.1	0.7715	2.66575	1.89425	3.45528	0.00719181	0.576974	hexose carrier protein HEX6-like \\ 0.00E+00 \\ 93.68 % \\ GO:0055085-IEA;GO:0016491-IEA;GO:0032440-IEA;GO:0016020-IEA;GO:0016021-IEA;GO:0008643-IEA;GO:0055114-IEA;GO:0015293-IEA;GO:0022857-IEA;GO:0005215-IEA \\ transmembrane transport-IEA;oxidoreductase		Sugar/inositol transporter
TRINITY_DN11109_c0_g1	FvH4_6g05650.1	11.6252	47.3933	35.768	4.07675	0.00156462	0.242583	mevalonate kinase \\ 4.30E-131 \\ 87.30 % \\ GO:0000166-IEA;GO:0005737-IEA;GO:0006629-IEA;GO:0016020-IEA;GO:0019287-IEA;GO:0016021-IEA;GO:0016310-IEA;GO:0016740-IEA;GO:0016301-IEA;GO:0016126-IEA;GO:0008299-IEA;GO:0008202-IEA;GO:0006694-IEA;GO:0004496-IEA;	mevalonate kinase [EC:2.7.1.36]	GHMP kinase, ATP-binding, conserved site	TRINITY_DN972_c0_g2	FvH4_3g23080.1	0.58525	2.0215	1.43625	3.45408	7.23562e-05	0.0552487	probable F-box protein At4g22030 \\ 0.00E+00 \\ 75.23 % \\ GO:0016746-IEA;GO:0016020-IEA;GO:0016021-IEA;GO:0016740-IEA;GO:0016787-IEA;GO:0004742-IEA \\ transferase activity, transferring acyl groups-IEA;membrane-IEA;integral component of membrane-IEA;tran		Petal formation-expressed
TRINITY_DN1515_c0_g1	FvH4_4g09040.1	0.665	2.70125	2.03625	4.06203	0.00135385	0.221615	tRNA pseudouridine synthase A, mitochondrial-like isoform X1 \\ 2.30E-34 \\ 94.02 % \\ GO:0001522-IEA;GO:0003723-IEA;GO:0031119-IBA;GO:0009982-IEA;GO:0009982-IBA;GO:0009451-IEA;GO:0106029-IEA;GO:1990481-IBA;GO:0005634-IBA;GO:0016853-IEA \\ pseudouridine s		Pseudouridine synthase I, TruA	TRINITY_DN24955_c0_g1	FvH4_6g05020.1	0.49025	1.693	1.20275	3.45334	0.00115857	0.221357	probable LRR receptor-like serine/threonine-protein kinase RKF3 \\ 0.00E+00 \\ 83.35 % \\ GO:0016020-IEA;GO:0016021-IEA;GO:0016310-IEA;GO:0004672-IEA;GO:0016740-IEA;GO:0016301-IEA;GO:0004674-IEA;GO:0005524-IEA;GO:0006468-IEA \\ membrane-IEA;integral compo		Protein kinase domain
TRINITY_DN197_c5_g1	FvH4_c1g00190.1	4.365	17.6865	13.3215	4.05189	0.043552	1	chimeric ATP8-orf225 synthase subunit (mitochondrion) \\ 0.00E+00 \\ 83.31 % \\ GO:0016757-IEA;GO:0016020-IEA;GO:0016021-IEA;GO:0008378-IEA;GO:0005794-IEA;GO:0006486-IEA;GO:0000139-IEA;GO:0016740-IEA \\ transferase activity, transferring glycosyl groups-I			TRINITY_DN10347_c1_g1	FvH4_6g21100.1	0.787	2.7105	1.9235	3.44409	0.00323688	0.378438	probable carboxylesterase 15 \\ 1.30E-05 \\ 50.00 % \\ GO:0003676-IEA \\ nucleic acid binding-IEA		Alpha/beta hydrolase fold-3
TRINITY_DN1369_c1_g1	FvH4_3g21410.1	0.77275	3.1305	2.35775	4.05112	7.49644e-06	0.0169577	G-type lectin S-receptor-like serine/threonine-protein kinase SD1-1 \\ 0.00E+00 \\ 84.78 % \\ GO:0000166-IEA;GO:0048544-IEA;GO:0016020-IEA;GO:0016021-IEA;GO:0016310-IEA;GO:0016740-IEA;GO:0004672-IEA;GO:0016301-IEA;GO:0004674-IEA;GO:0005524-IEA;GO:0006468-			TRINITY_DN2620_c0_g2	FvH4_5g36070.1	8.4195	28.8818	20.4623	3.43034	0.000862755	0.189501	vegetative cell wall protein gp1 \\ 3.60E-150 \\ 84.06 %		Cytochrome c1, transmembrane anchor, C-terminal
TRINITY_DN17395_c0_g1	FvH4_2g28040.1	0.375	1.51525	1.14025	4.04067	1.71631e-05	0.020899	4-hydroxycoumarin synthase 1-like \\ 1.80E-121 \\ 71.85 % \\ GO:0007165-IEA;GO:0016020-IEA;GO:0016021-IEA;GO:0043531-IEA;GO:0016787-IEA \\ signal transduction-IEA;membrane-IEA;integral component of membrane-IEA;ADP binding-IEA;hydrolase activity-IEA \\ GO	chalcone synthase [EC:2.3.1.74]	Chalcone/stilbene synthase, N-terminal	TRINITY_DN9945_c0_g1	FvH4_2g16180.1	5.77925	19.752	13.9727	3.41774	0.000108158	0.0663594	NAC transcription factor \\ 1.10E-67 \\ 92.41 % \\ GO:0003677-IEA;GO:0045792-IEA;GO:0006355-IEA;GO:0010200-IEA;GO:0005634-IEA;GO:0009965-IEA;GO:0048281-IEA \\ DNA binding-IEA;negative regulation of cell size-IEA;regulation of transcription, DNA-templated-		NAC domain
TRINITY_DN3356_c0_g2	FvH4_c1g00080.1	11.6983	47.205	35.5067	4.03522	0.01078	0.683632	NADH dehydrogenase subunit 6 (mitochondrion) \\ 7.90E-113 \\ 97.89 % \\ GO:0031966-IEA;GO:0005747-IBA;GO:0016491-IEA;GO:0005739-IC;GO:0005739-IEA;GO:0016020-IEA;GO:0016021-IEA;GO:0008137-IEA;GO:0008137-IBA;GO:0055114-IEA;GO:0070469-IEA \\ mitochondrial me		ATP synthase, F0 complex, subunit B/MI25	TRINITY_DN11416_c0_g1	FvH4_6g20400.1	1.1495	3.9145	2.765	3.40539	0.000546056	0.151154	E3 ubiquitin-protein ligase PUB23-like \\ 7.70E-146 \\ 78.78 % \\ GO:0009733-IEA \\ response to auxin-IEA \\ GO:0009733 \\ response to auxin		U box domain
TRINITY_DN7928_c0_g1	FvH4_c1g00200.1	2.652	10.691	8.039	4.0313	0.0369324	1	DNA polymerase-like \\ 0.00E+00 \\ 69.41 % \\ GO:0003677-IEA;GO:0003887-IEA;GO:0006260-IEA;GO:0000166-IEA;GO:0016779-IEA;GO:0003899-IEA;GO:0006351-IEA;GO:0005739-IEA;GO:0071897-IEA;GO:0016740-IEA;GO:0003676-IEA \\ DNA binding-IEA;DNA-directed DNA polymera			TRINITY_DN8060_c0_g1	FvH4_7g14870.1	0.38075	1.29575	0.915	3.40315	0.00169874	0.271298	putative transcription factor interactor and regulator C3H-WRC/GRF family \\ 0.00E+00 \\ 75.66 % \\ GO:0004180-IEA;GO:0006508-IEA;GO:0016787-IEA \\ carboxypeptidase activity-IEA;proteolysis-IEA;hydrolase activity-IEA \\ GO:0004180;GO:0006508 \\ carboxypep		WRC domain
TRINITY_DN7397_c0_g5	FvH4_6g03510.1	0.433	1.74225	1.30925	4.02367	0.00261261	0.316986	PREDICTED: uncharacterized protein LOC101294672 \\ 7.30E-14 \\ 90.44 % \\ GO:0003723-IEA;GO:0003676-IEA \\ RNA binding-IEA;nucleic acid binding-IEA \\ GO:0003723 \\ RNA binding		Protein of unknown function DUF1517	TRINITY_DN1946_c0_g1	FvH4_2g30840.1	1.76525	6.0055	4.24025	3.40207	0.00273585	0.348567	serine/threonine-protein kinase At5g01020 \\ 0.00E+00 \\ 79.98 % \\ GO:0016310-IEA;GO:0016740-IEA;GO:0004672-IEA;GO:0016301-IEA;GO:0005524-IEA;GO:0006468-IEA \\ phosphorylation-IEA;transferase activity-IEA;protein kinase activity-IEA;kinase activity-IEA;A		Protein kinase domain
TRINITY_DN4246_c0_g4	FvH4_c1g00260.1	1.9385	7.7785	5.84	4.01264	0.0482467	1	NADH dehydrogenase subunit 1 (mitochondrion) \\ 8.10E-67 \\ 92.54 % \\ GO:0003954-IBA;GO:0016491-IEA;GO:0005739-IEA;GO:0016020-IEA;GO:0016021-IEA;GO:0055114-IEA;GO:0008137-IEA;GO:0070469-IEA;GO:0009060-IBA;GO:0005886-IEA;GO:0005743-IEA \\ NADH dehydrogena			TRINITY_DN16434_c0_g1	FvH4_4g27220.1	1.24775	4.24175	2.994	3.39952	0.000710769	0.169752	VQ motif-containing protein 20-like \\ 0.00E+00 \\ 66.55 % \\ GO:0016020-IEA;GO:0016021-IEA \\ membrane-IEA;integral component of membrane-IEA		VQ
TRINITY_DN10604_c0_g1	FvH4_3g16140.1	1.376	5.51675	4.14075	4.00927	0.000148198	0.0659759	ankyrin repeat-containing protein At5g02620-like \\ 0.00E+00 \\ 79.37 % \\ GO:2000031-IEA;GO:0016020-IEA;GO:0016021-IEA;GO:0071446-IEA;GO:0031347-IEA \\ regulation of salicylic acid mediated signaling pathway-IEA;membrane-IEA;integral component of membran		Ankyrin repeat	TRINITY_DN232803_c0_g1	FvH4_7g05940.1	0.96325	3.26875	2.3055	3.39346	0.000797205	0.181117	PREDICTED: uncharacterized protein LOC105352906 \\ 3.60E-07 \\ 96.71 % \\ GO:0016310-IEA;GO:0016301-IEA \\ phosphorylation-IEA;kinase activity-IEA
TRINITY_DN86_c0_g1	FvH4_5g32680.1	3.65725	14.649	10.9918	4.00547	0.0005144	0.133618	putative 12-oxophytodienoate reductase 11 \\ 0.00E+00 \\ 95.03 % \\ GO:0016491-IEA;GO:0003824-IEA;GO:0010181-IEA;GO:0016629-IEA;GO:0055114-IEA \\ oxidoreductase activity-IEA;catalytic activity-IEA;FMN binding-IEA;12-oxophytodienoate reductase activity-IEA	12-oxophytodienoic acid reductase [EC:1.3.1.42]	NADH:flavin oxidoreductase/NADH oxidase, N-terminal	TRINITY_DN12531_c0_g1	FvH4_5g20910.1	9.43425	31.967	22.5328	3.3884	9.39959e-05	0.0610914	lon protease homolog 2, peroxisomal \\ 0.00E+00 \\ 96.96 % \\ GO:0000166-IEA;GO:0006515-IEA;GO:0006625-IBA;GO:0006508-IEA;GO:0016485-IEA;GO:0016485-IBA;GO:0016787-IEA;GO:0016887-IEA;GO:0016558-IEA;GO:0008233-IEA;GO:0030163-IEA;GO:0005782-IEA;GO:0005782-IB	ATP-dependent Lon protease [EC:3.4.21.53]	Lon, substrate-binding domain
TRINITY_DN18381_c0_g1	FvH4_7g25370.1	0.4515	1.79975	1.34825	3.98616	0.0139981	0.791266	neuronal PAS domain protein \\ 0.00E+00 \\ 87.43 %		Single hybrid motif	TRINITY_DN12754_c0_g1	FvH4_5g17240.1	2.7615	9.35375	6.59225	3.3872	0.0312753	1	probable calcium-binding protein CML27 \\ 2.00E-111 \\ 85.32 % \\ GO:0005509-IEA \\ calcium ion binding-IEA \\ GO:0005509 \\ calcium ion binding		EF-hand domain
TRINITY_DN1344_c1_g2	FvH4_4g05160.1	5.40975	21.5422	16.1325	3.98212	0.0300357	1	ammonium transporter 1 member 1 \\ 0.00E+00 \\ 94.09 % \\ GO:0008519-IEA;GO:0015696-IEA;GO:0072488-IEA;GO:0016020-IEA;GO:0016021-IEA \\ ammonium transmembrane transporter activity-IEA;ammonium transport-IEA;ammonium transmembrane transport-IEA;membrane-IE		Ammonium transporter	TRINITY_DN173679_c0_g1	FvH4_3g23270.1	0.49575	1.67575	1.18	3.38023	0.000343434	0.120229	LIM and calponin domains-containing protein 1, putative \\ 2.00E-07 \\ 54.36 % \\ GO:0016020-IEA;GO:0016021-IEA \\ membrane-IEA;integral component of membrane-IEA		Protein of unknown function DUF761, plant
TRINITY_DN335_c1_g1	FvH4_c1g00500.1	10.9198	43.3725	32.4528	3.97193	0.0213048	0.992795	ATPase subunit 8 (mitochondrion) \\ 8.50E-89 \\ 93.51 % \\ GO:0005739-IEA;GO:0005739-IBA;GO:0016020-IEA;GO:0016020-IBA;GO:0016021-IEA;GO:0016787-IEA \\ mitochondrion-IEA;mitochondrion-IBA;membrane-IEA;membrane-IBA;integral component of membrane-IEA;hydrol			TRINITY_DN8438_c0_g1	FvH4_2g35010.1	2.195	7.399	5.204	3.37084	0.0168041	0.901514	transcription factor MYB44-like \\ 0.00E+00 \\ 86.82 % \\ GO:0000166-IEA;GO:0046872-IEA;GO:0120029-IEA;GO:0016020-IEA;GO:0016021-IEA;GO:0008553-IEA;GO:0006811-IEA;GO:0005524-IEA;GO:0016787-IEA;GO:0005886-IEA \\ nucleotide binding-IEA;metal ion binding-IEA		SANT/Myb domain
TRINITY_DN4503_c1_g1	FvH4_3g02820.1	2.50025	9.89925	7.399	3.9593	2.0088e-05	0.0225278	cysteine-rich receptor-like protein kinase 25 \\ 0.00E+00 \\ 80.21 % \\ GO:0016020-IEA;GO:0016021-IEA;GO:0016310-IEA;GO:0004672-IEA;GO:0016740-IEA;GO:0042742-IBA;GO:0016301-IEA;GO:0004674-IBA;GO:0005524-IEA;GO:0006468-IEA;GO:0006468-IBA;GO:0005886-IBA \\		Protein kinase domain	TRINITY_DN364_c0_g1	FvH4_6g49580.1	12.462	41.5998	29.1378	3.33813	1.29328e-06	0.0110673	AAA-ATPase ASD, mitochondrial-like \\ 0.00E+00 \\ 89.67 % \\ GO:0000166-IEA;GO:0005524-IEA \\ nucleotide binding-IEA;ATP binding-IEA \\ GO:0005524 \\ ATP binding		AAA+ ATPase domain
TRINITY_DN2771_c0_g1	FvH4_2g12540.1	9.884	39.0513	29.1673	3.95096	7.0086e-06	0.0167026	LEAF RUST 10 DISEASE-RESISTANCE LOCUS RECEPTOR-LIKE PROTEIN KINASE-like 1.4 \\ 0.00E+00 \\ 80.02 % \\ GO:0016020-IEA;GO:0016021-IEA;GO:0016740-IEA;GO:0004672-IEA;GO:0030247-IEA;GO:0005524-IEA;GO:0006468-IEA \\ membrane-IEA;integral component of membrane-I		Protein kinase domain	TRINITY_DN3167_c0_g1	FvH4_4g32900.1	1.43225	4.76875	3.3365	3.32955	0.000185095	0.0866601	Transmembrane protein \\ 6.80E-119 \\ 83.63 % \\ GO:0016020-IEA;GO:0016021-IEA \\ membrane-IEA;integral component of membrane-IEA \\ GO:0016021 \\ integral component of membrane
TRINITY_DN6262_c0_g1	FvH4_6g07150.1	3.14875	12.375	9.22625	3.93013	4.71043e-06	0.0145114	calmodulin-binding protein 60 G-like \\ 0.00E+00 \\ 78.43 % \\ GO:0005516-IEA \\ calmodulin binding-IEA \\ GO:0005516 \\ calmodulin binding		CALMODULIN-BINDING PROTEIN60	TRINITY_DN2655_c1_g1	FvH4_7g13890.1	8.98825	29.902	20.9138	3.32679	2.87839e-05	0.0359006	FT-interacting protein 1-like \\ 0.00E+00 \\ 91.50 % \\ GO:0016757-IEA;GO:0016020-IEA;GO:0016021-IEA;GO:0016740-IEA \\ transferase activity, transferring glycosyl groups-IEA;membrane-IEA;integral component of membrane-IEA;transferase activity-IEA \\ GO:00		C2 domain
TRINITY_DN118_c0_g1	FvH4_2g02540.1	12.94	50.7583	37.8183	3.92259	0.000838661	0.169866	receptor-like protein kinase HAIKU2 \\ 0.00E+00 \\ 80.74 % \\ GO:0000166-IEA;GO:0016020-IEA;GO:0016021-IEA;GO:0016310-IEA;GO:0016740-IEA;GO:0004672-IEA;GO:0016301-IEA;GO:0004674-IEA;GO:0005524-IEA;GO:0006468-IEA \\ nucleotide binding-IEA;membrane-IEA;inte		Protein kinase domain	TRINITY_DN22511_c0_g1	FvH4_6g18050.1	0.62475	2.076	1.45125	3.32293	0.00333403	0.38512	hypothetical protein RchiOBHm_Chr3g0472321
TRINITY_DN324_c1_g1	FvH4_2g28400.1	21.4753	84.0667	62.5915	3.91459	0.0209261	0.98243	ATPase subunit 1 (mitochondrion) \\ 0.00E+00 \\ 98.69 % \\ GO:0000166-IEA;GO:0045261-IEA;GO:0009507-IEA;GO:0005739-IEA;GO:0046034-IEA;GO:0032559-IEA;GO:0016787-IEA;GO:0015986-IEA;GO:1902600-IEA;GO:0006811-IEA;GO:0005524-IEA;GO:0046933-IEA;GO:0006754-IEA;G		ATPase, F1/V1/A1 complex, alpha/beta subunit, nucleotide-binding domain	TRINITY_DN1369_c1_g1	FvH4_3g21410.1	0.943	3.1305	2.1875	3.31972	1.68062e-05	0.0296182	G-type lectin S-receptor-like serine/threonine-protein kinase SD1-1 \\ 0.00E+00 \\ 84.78 % \\ GO:0000166-IEA;GO:0048544-IEA;GO:0016020-IEA;GO:0016021-IEA;GO:0016310-IEA;GO:0016740-IEA;GO:0004672-IEA;GO:0016301-IEA;GO:0004674-IEA;GO:0005524-IEA;GO:0006468-
TRINITY_DN1921_c0_g3	FvH4_c3g00070.1	328.901	1286.4	957.502	3.91122	0.0326252	1	transport membrane protein (mitochondrion) \\ 3.20E-151 \\ 93.10 % \\ GO:0031966-IEA;GO:0005739-IEA;GO:0016020-IEA;GO:0016021-IEA \\ mitochondrial membrane-IEA;mitochondrion-IEA;membrane-IEA;integral component of membrane-IEA \\ GO:0016021;GO:0031966 \\ i			TRINITY_DN10325_c0_g5	FvH4_6g06490.1	0.41375	1.36725	0.9535	3.30453	0.00214945	0.306424	respiratory burst oxidase homolog protein B \\ 0.00E+00 \\ 89.52 % \\ GO:0050664-IEA;GO:0004601-IEA;GO:0016491-IEA;GO:0016174-IEA;GO:0016020-IEA;GO:0016021-IEA;GO:0005509-IEA;GO:0055114-IEA;GO:0098869-IEA \\ oxidoreductase activity, acting on NAD(P)H, oxy	respiratory burst oxidase [EC:1.6.3.- 1.11.1.-]	Cytochrome b245, heavy chain
TRINITY_DN125_c0_g2	FvH4_1g25150.1	11.812	45.783	33.971	3.87597	8.97556e-05	0.0509375	NAC domain-containing protein 2-like \\ 4.00E-104 \\ 92.64 % \\ GO:0003677-IEA;GO:0006355-IEA;GO:0005634-IEA \\ DNA binding-IEA;regulation of transcription, DNA-templated-IEA;nucleus-IEA \\ GO:0003677;GO:0005634;GO:0006355 \\ DNA binding;nucleus;regulatio		NAC domain	TRINITY_DN86_c0_g1	FvH4_5g32680.1	4.43975	14.649	10.2093	3.29951	0.000878854	0.191207	putative 12-oxophytodienoate reductase 11 \\ 0.00E+00 \\ 95.03 % \\ GO:0016491-IEA;GO:0003824-IEA;GO:0010181-IEA;GO:0016629-IEA;GO:0055114-IEA \\ oxidoreductase activity-IEA;catalytic activity-IEA;FMN binding-IEA;12-oxophytodienoate reductase activity-IEA	12-oxophytodienoic acid reductase [EC:1.3.1.42]	NADH:flavin oxidoreductase/NADH oxidase, N-terminal
TRINITY_DN7402_c0_g1	FvH4_2g16000.1	1.3175	5.09875	3.78125	3.87002	0.000822689	0.168179	L-ascorbate oxidase homolog \\ 0.00E+00 \\ 91.29 % \\ GO:0016491-IEA;GO:0005507-IEA;GO:0055114-IEA;GO:0052716-IEA;GO:0008447-IEA \\ oxidoreductase activity-IEA;copper ion binding-IEA;oxidation-reduction process-IEA;hydroquinone:oxygen oxidoreductase activ		Multicopper oxidase, type 1	TRINITY_DN4503_c1_g1	FvH4_3g02820.1	3.0005	9.89925	6.89875	3.2992	3.68462e-05	0.0404873	cysteine-rich receptor-like protein kinase 25 \\ 0.00E+00 \\ 80.21 % \\ GO:0016020-IEA;GO:0016021-IEA;GO:0016310-IEA;GO:0004672-IEA;GO:0016740-IEA;GO:0042742-IBA;GO:0016301-IEA;GO:0004674-IBA;GO:0005524-IEA;GO:0006468-IEA;GO:0006468-IBA;GO:0005886-IBA \\		Protein kinase domain
TRINITY_DN6627_c0_g4	FvH4_1g07620.1	0.36625	1.412	1.04575	3.85529	0.00869056	0.605724	cytokinin dehydrogenase 3-like \\ 0.00E+00 \\ 85.90 % \\ GO:0009690-IEA;GO:0071949-IEA;GO:0003824-IEA;GO:0016491-IEA;GO:0050660-IEA;GO:0016020-IEA;GO:0016021-IEA;GO:0055114-IEA;GO:0019139-IEA \\ cytokinin metabolic process-IEA;FAD binding-IEA;catalytic ac	cytokinin dehydrogenase [EC:1.5.99.12]	Oxygen oxidoreductase covalent FAD-binding site	TRINITY_DN5194_c0_g1	FvH4_1g04240.1	0.44775	1.4765	1.02875	3.2976	0.00282769	0.355693	auxin-responsive protein IAA1-like		PB1 domain
TRINITY_DN468_c0_g3	FvH4_2g05080.1	5.05975	19.5023	14.4425	3.85439	0.0252378	1	NADH dehydrogenase subunit 7 (mitochondrion) \\ 0.00E+00 \\ 99.56 % \\ GO:0003954-IEA;GO:0051287-IEA;GO:0016491-IEA;GO:0005739-IEA;GO:0048038-IEA;GO:0055114-IEA;GO:0070469-IEA;GO:0008137-IEA;GO:0016651-IEA \\ NADH dehydrogenase activity-IEA;NAD binding-IE	NADH dehydrogenase (ubiquinone) Fe-S protein 2 [EC:1.6.5.3 1.6.99.3]	NADH-quinone oxidoreductase, subunit D	TRINITY_DN27963_c0_g1	FvH4_5g16370.1	4.50525	14.8558	10.3505	3.29743	0.00676216	0.558953	CDP-diacylglycerol-glycerol-3-phosphate 3-phosphatidyltransferase \\ 1.80E-111 \\ 87.48 % \\ GO:0009773-IBA;GO:0046872-IEA;GO:0009055-IEA;GO:0020037-IEA;GO:0022900-IEA \\ photosynthetic electron transport in photosystem I-IBA;metal ion binding-IEA;electro
TRINITY_DN995_c0_g1	FvH4_2g11020.1	2.23225	8.58425	6.352	3.84556	1.57435e-05	0.0201682	glutamyl-tRNA reductase 2, chloroplastic-like \\ 0.00E+00 \\ 89.40 % \\ GO:0006779-IEA;GO:0016491-IEA;GO:0050661-IEA;GO:0055114-IEA;GO:0006782-IEA;GO:0033014-IEA;GO:0008883-IEA \\ porphyrin-containing compound biosynthetic process-IEA;oxidoreductase activ	glutamyl-tRNA reductase [EC:1.2.1.70]	Tetrapyrrole biosynthesis, glutamyl-tRNA reductase	TRINITY_DN262174_c0_g1	FvH4_1g29930.1	1.70075	5.593	3.89225	3.28855	0.000612332	0.158655	U-box domain-containing protein 21-like \\ 1.50E-105 \\ 77.84 % \\ GO:0016787-IEA \\ hydrolase activity-IEA		U box domain
TRINITY_DN4140_c1_g1	FvH4_c1g00230.1	1.5905	6.09175	4.50125	3.83008	0.0395069	1	cytochrome c biogenesis Fn (mitochondrion) \\ 3.40E-138 \\ 69.59 % \\ GO:0045905-IEA;GO:0003723-IEA;GO:0003746-IEA;GO:0043022-IEA;GO:0006452-IEA;GO:0045901-IEA;GO:0006414-IEA \\ positive regulation of translational termination-IEA;RNA binding-IEA;translat		Cytochrome c assembly protein	TRINITY_DN224_c0_g2	FvH4_3g17480.1	92.537	302.096	209.559	3.2646	0.00145972	0.250667	alpha-amylase/subtilisin inhibitor-like \\ 0.00E+00 \\ 73.36 % \\ GO:0048046-IEA;GO:0005618-IEA;GO:0071555-IEA;GO:0016740-IEA;GO:0016762-IEA;GO:0016798-IEA;GO:0016787-IEA;GO:0010411-IEA;GO:0008152-IEA;GO:0006073-IEA;GO:0016757-IEA;GO:0005576-IEA;GO:000455		Proteinase inhibitor I3, Kunitz legume
TRINITY_DN1696_c0_g1	FvH4_6g32110.1	1.319	5.04575	3.72675	3.82544	0.000146224	0.065571	putative disease resistance protein RGA3 \\ 0.00E+00 \\ 74.14 % \\ GO:0043531-IEA;GO:0016787-IEA \\ ADP binding-IEA;hydrolase activity-IEA \\ GO:0016787;GO:0043531 \\ hydrolase activity;ADP binding		NB-ARC	TRINITY_DN321948_c0_g1	FvH4_7g01400.1	15.0053	48.8695	33.8642	3.25683	3.44044e-05	0.0391106	hypothetical protein RchiOBHm_Chr1g0317121 \\ 4.40E-09 \\ 96.97 % \\ GO:0046940-IEA;GO:0016310-IEA;GO:0016740-IEA;GO:0016301-IEA;GO:0006139-IEA;GO:0019205-IEA;GO:0005524-IEA;GO:0016776-IEA;GO:0004017-IEA \\ nucleoside monophosphate phosphorylation-IEA;pho
TRINITY_DN7928_c0_g3	FvH4_c1g00520.1	2.3855	9.11375	6.72825	3.82048	0.0392804	1	NADH-ubiquinone oxidoreductase chain 2 \\ 2.30E-72 \\ 83.43 % \\ GO:0045263-IEA;GO:0005739-IEA;GO:0015078-IEA;GO:0016020-IEA;GO:0016021-IEA;GO:0015986-IEA \\ proton-transporting ATP synthase complex, coupling factor F(o)-IEA;mitochondrion-IEA;proton trans			TRINITY_DN9375_c0_g1	FvH4_7g09660.1	8.86	28.845	19.985	3.25564	0.0028271	0.355693	putative histidine phosphatase superfamily \\ 2.50E-97 \\ 85.17 % \\ GO:0016791-IBA;GO:0016311-IEA \\ phosphatase activity-IBA;dephosphorylation-IEA \\ GO:0016311;GO:0016791 \\ dephosphorylation;phosphatase activity		PRIB5
TRINITY_DN809_c0_g2	FvH4_4g03510.1	13.8113	52.7575	38.9462	3.81989	0.00110812	0.19836	early nodulin-75-like \\ 1.50E-105 \\ 66.97 % \\ GO:0043531-IEA \\ ADP binding-IEA \\ GO:0043531 \\ ADP binding			TRINITY_DN10604_c0_g1	FvH4_3g16140.1	1.69625	5.51675	3.8205	3.25232	0.0002453	0.1013	ankyrin repeat-containing protein At5g02620-like \\ 0.00E+00 \\ 79.37 % \\ GO:2000031-IEA;GO:0016020-IEA;GO:0016021-IEA;GO:0071446-IEA;GO:0031347-IEA \\ regulation of salicylic acid mediated signaling pathway-IEA;membrane-IEA;integral component of membran		Ankyrin repeat
TRINITY_DN1222_c0_g1	FvH4_4g19740.1	125.766	478.66	352.894	3.80596	0.0013109	0.217474	ATP-citrate synthase beta chain protein 2 \\ 0.00E+00 \\ 98.38 % \\ GO:0016746-IEA;GO:0003878-IEA;GO:0003824-IEA;GO:0016740-IEA;GO:0046912-IEA \\ transferase activity, transferring acyl groups-IEA;ATP citrate synthase activity-IEA;catalytic activity-IEA;t	ATP citrate (pro-S)-lyase [EC:2.3.3.8]	Citrate synthase	TRINITY_DN3359_c0_g1	FvH4_3g29930.1	2.74175	8.90825	6.1665	3.24911	0.00266377	0.344385	PREDICTED: uncharacterized protein LOC101299937 \\ 2.70E-96 \\ 76.84 %
TRINITY_DN740_c0_g1	FvH4_5g16950.1	3.7305	14.116	10.3855	3.78394	0.00142582	0.228183	probable glutathione S-transferase \\ 8.00E-160 \\ 86.86 %			TRINITY_DN4060_c0_g1	FvH4_5g39130.1	14.35	46.6232	32.2732	3.24901	0.00668779	0.556299	putative transcription factor WD40-like family \\ 1.50E-114 \\ 89.54 % \\ GO:0016020-IEA;GO:0016021-IEA;GO:0005783-IBA \\ membrane-IEA;integral component of membrane-IEA;endoplasmic reticulum-IBA \\ GO:0005783;GO:0016021 \\ endoplasmic reticulum;integral		WD40/YVTN repeat-like-containing domain superfamily
TRINITY_DN1087_c0_g2	FvH4_3g36720.1	10.4612	39.4372	28.976	3.76984	0.00398324	0.394191	scarecrow-like protein 30 \\ 0.00E+00 \\ 76.10 %		Transcription factor GRAS	TRINITY_DN2138_c0_g1	FvH4_6g45960.1	107.976	349.779	241.803	3.23942	0.000291825	0.110175	6-phosphogluconate dehydrogenase, decarboxylating 3 \\ 0.00E+00 \\ 97.81 % \\ GO:0016491-IEA;GO:0006098-IEA;GO:0004616-IEA;GO:0050661-IEA;GO:0019521-IEA;GO:0055114-IEA \\ oxidoreductase activity-IEA;pentose-phosphate shunt-IEA;phosphogluconate dehydrogena	6-phosphogluconate dehydrogenase [EC:1.1.1.44 1.1.1.343]	6-phosphogluconate dehydrogenase, decarboxylating
TRINITY_DN14905_c0_g1	FvH4_c3g00060.1	570.425	2141.87	1571.45	3.75487	0.0199623	0.957103	30S ribosomal protein S11, chloroplastic \\ 1.50E-84 \\ 89.46 % \\ GO:0003723-IEA;GO:0003735-IEA;GO:0003735-IBA;GO:0022627-IBA;GO:0015935-IEA;GO:1990904-IEA;GO:0005840-IEA;GO:0006412-IEA \\ RNA binding-IEA;structural constituent of ribosome-IEA;structural			TRINITY_DN8434_c0_g1	FvH4_2g06670.1	9.53825	30.8885	21.3502	3.23838	0.00135204	0.240904	probable membrane-associated kinase regulator 3 \\ 0.00E+00 \\ 71.64 %		Protein of unknown function DUF688
TRINITY_DN2355_c0_g1	FvH4_5g18080.1	1.94275	7.2875	5.34475	3.75113	2.01606e-05	0.0225278	probable cyclic nucleotide-gated ion channel 20, chloroplastic isoform X1 \\ 0.00E+00 \\ 83.80 % \\ GO:0055085-IEA;GO:0016020-IEA;GO:0034220-IEA;GO:0016021-IEA;GO:0006811-IEA;GO:0005216-IEA \\ transmembrane transport-IEA;membrane-IEA;ion transmembrane tra	cyclic nucleotide gated channel, plant	Cyclic nucleotide-binding domain	TRINITY_DN1513_c0_g1	FvH4_6g46040.1	1.59325	5.15825	3.565	3.23756	0.00781445	0.599566	i2 len=2175 path=[1:0-1415 2:1416-2174]		Aerolysin-like toxin
TRINITY_DN24451_c0_g1	FvH4_6g32310.1	1.78525	6.6955	4.91025	3.75046	6.94367e-06	0.0167026	ABC transporter G family member 29 \\ 0.00E+00 \\ 93.10 % \\ GO:0000166-IEA;GO:0016020-IEA;GO:0015709-IEA;GO:0016021-IEA;GO:0102025-IEA;GO:0015419-IEA;GO:0016787-IEA;GO:0016887-IEA;GO:0042626-IBA;GO:0055085-IBA;GO:1902358-IEA;GO:0099133-IEA;GO:0005524-IEA		ABC transporter-like	TRINITY_DN2026_c5_g1	FvH4_1g10470.1	7.0415	22.7778	15.7363	3.23479	5.1922e-06	0.0174224	probable serine/threonine-protein kinase PIX13 \\ 0.00E+00 \\ 88.37 % \\ GO:0000166-IEA;GO:0016310-IEA;GO:0004672-IEA;GO:0016740-IEA;GO:0016301-IEA;GO:0004674-IEA;GO:0005524-IEA;GO:0006468-IEA \\ nucleotide binding-IEA;phosphorylation-IEA;protein kinase a		Protein kinase domain
TRINITY_DN335_c1_g2	FvH4_c1g00550.1	5.7205	21.4417	15.7212	3.74823	0.0470739	1	orf112a gene product (mitochondrion) \\ 1.20E-22 \\ 74.22 % \\ GO:0030170-IEA \\ pyridoxal phosphate binding-IEA			TRINITY_DN18742_c0_g1	FvH4_2g09320.1	0.99875	3.23025	2.2315	3.23429	0.00210226	0.301791	---NA---
TRINITY_DN13748_c0_g1	FvH4_2g37950.1	0.82375	3.083	2.25925	3.74264	0.00770274	0.565265	PREDICTED: uncharacterized protein At1g76070-like \\ 0.00E+00 \\ 73.65 % \\ GO:0003824-IEA;GO:0004099-IEA;GO:0005975-IEA;GO:0016787-IEA;GO:0016810-IEA \\ catalytic activity-IEA;chitin deacetylase activity-IEA;carbohydrate metabolic process-IEA;hydrolase a			TRINITY_DN3423_c0_g1	FvH4_4g26940.1	1.721	5.55325	3.83225	3.22676	0.000266801	0.105791	probable receptor-like protein kinase At1g67000 \\ 0.00E+00 \\ 76.03 %		Protein kinase domain
TRINITY_DN11114_c0_g1	FvH4_5g36850.1	2.40925	9.0145	6.60525	3.74162	0.0418581	1	protein EXORDIUM-like 2 \\ 0.00E+00 \\ 85.75 % \\ GO:0005506-IEA;GO:0016491-IEA;GO:0016705-IEA;GO:0046872-IEA;GO:0016020-IEA;GO:0016021-IEA;GO:0020037-IEA;GO:0055114-IEA;GO:0004497-IEA;GO:0036204-IEA \\ iron ion binding-IEA;oxidoreductase activity-IEA;oxi		Protein EXORDIUM-like	TRINITY_DN12329_c0_g1	FvH4_2g06250.1	2.369	7.62275	5.25375	3.21771	0.000707843	0.169437	sugar transport protein 10-like \\ 0.00E+00 \\ 88.12 % \\ GO:0016491-IEA;GO:0016020-IEA;GO:0016021-IEA;GO:0055114-IEA;GO:0055085-IEA;GO:0032440-IEA;GO:0005351-IBA;GO:1904659-IEA;GO:0008643-IEA;GO:0005355-IBA;GO:0022857-IEA;GO:1902600-IEA;GO:0005887-IBA;GO		Sugar/inositol transporter
TRINITY_DN4536_c0_g1	FvH4_1g05040.1	15.6375	58.4935	42.856	3.74059	0.00186848	0.266464	putative arabinogalactan peptide, AGP \\ 6.80E-62 \\ 83.16 % \\ GO:0007165-IEA;GO:0016020-IEA;GO:0016021-IEA;GO:0043531-IEA;GO:0016787-IEA \\ signal transduction-IEA;membrane-IEA;integral component of membrane-IEA;ADP binding-IEA;hydrolase activity-IEA \\			TRINITY_DN6969_c0_g2	FvH4_6g25060.1	11.698	37.5735	25.8755	3.21196	0.0245438	1	probable calcium-binding protein CML36 \\ 1.40E-122 \\ 79.63 % \\ GO:0005509-IEA \\ calcium ion binding-IEA \\ GO:0005509 \\ calcium ion binding		EF-hand domain
TRINITY_DN117_c0_g1	FvH4_4g26620.1	0.54525	2.0385	1.49325	3.73865	0.000110118	0.0561655	uncharacterized protein LOC112199646 \\ 2.00E-31 \\ 87.04 % \\ GO:0080085-IEA;GO:0009507-IEA;GO:0045038-IEA;GO:0009416-IEA;GO:0016787-IEA \\ signal recognition particle, chloroplast targeting-IEA;chloroplast-IEA;protein import into chloroplast thylakoid m			TRINITY_DN4213_c0_g1	FvH4_2g30930.1	2.60875	8.3775	5.76875	3.21131	0.000327755	0.11673	Copper-transporting ATPase PAA2, chloroplastic \\ 0.00E+00 \\ 77.53 % \\ GO:0006825-IEA;GO:0004008-IEA;GO:0000166-IEA;GO:0006812-IEA;GO:0009507-IEA;GO:0046872-IEA;GO:0016020-IEA;GO:0016021-IEA;GO:0043682-IBA;GO:0030001-IEA;GO:0035434-IEA;GO:0016787-IEA;GO	Cu2+-exporting ATPase [EC:3.6.3.4]	P-type ATPase
TRINITY_DN6349_c0_g1	FvH4_6g33590.1	49.3515	184.476	135.125	3.738	0.000168781	0.0713257	beta-fructofuranosidase, insoluble isoenzyme CWINV1-like \\ 0.00E+00 \\ 87.67 % \\ GO:0008152-IEA;GO:0004553-IEA;GO:0004564-IEA;GO:0016787-IEA;GO:0005975-IEA;GO:0016798-IEA \\ metabolic process-IEA;hydrolase activity, hydrolyzing O-glycosyl compounds-IEA;	beta-fructofuranosidase [EC:3.2.1.26]	Glycoside hydrolase, family 32	TRINITY_DN6614_c0_g1	FvH4_2g34690.1	2.04825	6.5745	4.52625	3.20981	0.00358655	0.401056	patatin-like protein 2 \\ 0.00E+00 \\ 91.74 % \\ GO:0006629-IEA;GO:0016042-IEA;GO:0016787-IEA \\ lipid metabolic process-IEA;lipid catabolic process-IEA;hydrolase activity-IEA \\ GO:0016042;GO:0016787 \\ lipid catabolic process;hydrolase activity		Patatin-like phospholipase domain
TRINITY_DN5672_c0_g1	FvH4_5g03460.1	1.373	5.1315	3.7585	3.73744	0.0120389	0.727791	putative Late embryogenesis abundant protein, LEA-14		Late embryogenesis abundant protein, LEA-14	TRINITY_DN8128_c0_g1	FvH4_7g24490.1	1.05375	3.3755	2.32175	3.20332	0.00280473	0.354144	putative serine/threonine-protein kinase-like protein CCR3 \\ 0.00E+00 \\ 81.20 % \\ GO:0016020-IEA;GO:0016021-IEA;GO:0016310-IEA;GO:0004672-IEA;GO:0016740-IEA;GO:0016301-IEA;GO:0005524-IEA;GO:0006468-IEA \\ membrane-IEA;integral component of membrane-IEA		Protein kinase domain
TRINITY_DN11693_c0_g4	FvH4_c1g00050.1	4.492	16.7523	12.2602	3.72935	0.0210037	0.984183	NADH dehydrogenase subunit 3 (mitochondrion) \\ 0.00E+00 \\ 80.91 % \\ GO:0008152-IEA;GO:0008061-IEA;GO:0004553-IEA;GO:0005576-IEA;GO:0030246-IEA;GO:0016798-IEA;GO:0005975-IEA;GO:0016787-IEA \\ metabolic process-IEA;chitin binding-IEA;hydrolase activity,	NADH-ubiquinone oxidoreductase chain 3 [EC:1.6.5.3]	NADH:ubiquinone/plastoquinone oxidoreductase, chain 3	TRINITY_DN11936_c0_g1	FvH4_5g35950.1	3.771	12.0757	8.30475	3.20227	0.000130945	0.0724242	dihydrofolate reductase \\ 1.30E-90 \\ 81.08 % \\ GO:0003677-IEA;GO:0003700-IEA;GO:0016020-IEA;GO:0016021-IEA;GO:0006355-IEA;GO:0043565-IEA;GO:0005634-IEA \\ DNA binding-IEA;DNA-binding transcription factor activity-IEA;membrane-IEA;integral component of		Serine hydrolase FSH
TRINITY_DN78139_c0_g1	FvH4_3g15110.1	0.292	1.0885	0.7965	3.72774	0.00983942	0.650435	kinase RLK-Pelle-DLSV family \\ 0.00E+00 \\ 84.74 % \\ GO:0000166-IEA;GO:0004714-IEA;GO:0016020-IEA;GO:0016021-IEA;GO:0016310-IEA;GO:0004672-IEA;GO:0016740-IEA;GO:0016301-IEA;GO:0004674-IEA;GO:0005524-IEA;GO:0018108-IEA;GO:0006468-IEA \\ nucleotide bindin		Protein kinase domain	TRINITY_DN8330_c0_g1	FvH4_1g16840.1	3.16575	10.1242	6.9585	3.19806	0.000695129	0.167959	UDP-glycosyltransferase 84B2-like \\ 0.00E+00 \\ 71.03 % \\ GO:0016757-IEA;GO:0008194-IBA;GO:0016758-IEA;GO:0080043-IBA;GO:0080044-IBA;GO:0043231-IBA;GO:0016740-IEA \\ transferase activity, transferring glycosyl groups-IEA;UDP-glycosyltransferase activity	UDP-glucose:(indol-3-yl)acetate beta-D-glucosyltransferase [EC:2.4.1.121]	UDP-glucuronosyl/UDP-glucosyltransferase
TRINITY_DN4937_c1_g3	FvH4_2g13110.1	184.292	685.962	501.67	3.72215	0.00791888	0.573611	peroxidase 12 \\ 4.80E-126 \\ 93.07 % \\ GO:0006979-IEA;GO:0004601-IEA;GO:0016491-IEA;GO:0046872-IEA;GO:0020037-IEA;GO:0055114-IEA;GO:0098869-IEA;GO:0005576-IEA;GO:0042744-IEA \\ response to oxidative stress-IEA;peroxidase activity-IEA;oxidoreductase acti	peroxidase [EC:1.11.1.7]	Plant peroxidase	TRINITY_DN106042_c0_g1	FvH4_2g09920.1	7.9525	25.4247	17.4722	3.19708	1.85787e-05	0.0299651	purple acid phosphatase-like \\ 0.00E+00 \\ 92.79 % \\ GO:0046872-IEA;GO:0016311-IEA;GO:0003993-IEA;GO:0016787-IEA \\ metal ion binding-IEA;dephosphorylation-IEA;acid phosphatase activity-IEA;hydrolase activity-IEA \\ GO:0003993;GO:0016311;GO:0046872 \\ a		Calcineurin-like phosphoesterase domain, ApaH type
TRINITY_DN12723_c0_g1	FvH4_4g36960.1	4.0485	15.0475	10.999	3.71681	0.002298	0.29646	endochitinase A \\ 8.20E-49 \\ 85.38 % \\ GO:0016020-IEA;GO:0016021-IEA;GO:0005886-IEA \\ membrane-IEA;integral component of membrane-IEA;plasma membrane-IEA \\ GO:0005886;GO:0016021 \\ plasma membrane;integral component of membrane			TRINITY_DN3735_c0_g1	FvH4_2g39680.1	1.49475	4.776	3.28125	3.19518	0.0167457	0.90044	peroxiredoxin-2E-1, chloroplastic-like \\ 3.10E-47 \\ 80.33 % \\ GO:0003743-IEA;GO:0046982-IEA;GO:0006352-IEA;GO:0016020-IEA;GO:0016021-IEA;GO:0016874-IEA;GO:0006413-IEA \\ translation initiation factor activity-IEA;protein heterodimerization activity-IEA		Redoxin
TRINITY_DN3467_c0_g1	FvH4_3g04160.1	2.16975	8.0515	5.88175	3.7108	0.00185974	0.266355	CFE protein \\ 8.80E-122 \\ 76.45 % \\ GO:0016020-IEA;GO:0016021-IEA \\ membrane-IEA;integral component of membrane-IEA \\ GO:0016021 \\ integral component of membrane		Protein of unknown function DUF761, plant	TRINITY_DN1930_c0_g1	FvH4_7g24060.1	69.0998	219.597	150.497	3.17797	0.00101279	0.205675	uncharacterized acetyltransferase At3g50280 \\ 0.00E+00 \\ 84.51 % \\ GO:0016747-IEA;GO:0016740-IEA \\ transferase activity, transferring acyl groups other than amino-acyl groups-IEA;transferase activity-IEA \\ GO:0016747 \\ transferase activity, transfer		Transferase
TRINITY_DN14342_c0_g1	FvH4_5g26600.1	10.9053	40.28	29.3747	3.69363	0.000313359	0.100454	Poly polymerase 1, putative \\ 9.90E-04 \\ 74.42 % \\ GO:0008152-IEA;GO:0016020-IEA;GO:0016798-IEA;GO:0016787-IEA \\ metabolic process-IEA;membrane-IEA;hydrolase activity, acting on glycosyl bonds-IEA;hydrolase activity-IEA		Protein of unknown function DUF4228, plant	TRINITY_DN7334_c0_g1	FvH4_5g23180.1	3.69675	11.7447	8.048	3.17705	0.0116707	0.744519	probable xyloglucan endotransglucosylase/hydrolase protein 30 \\ 1.20E-08 \\ 71.76 % \\ GO:0005739-IEA \\ mitochondrion-IEA	xyloglucan:xyloglucosyl transferase [EC:2.4.1.207]	Glycoside hydrolase family 16
TRINITY_DN364_c0_g1	FvH4_6g49580.1	11.2737	41.5998	30.326	3.68997	1.08426e-06	0.00717468	AAA-ATPase ASD, mitochondrial-like \\ 0.00E+00 \\ 89.67 % \\ GO:0000166-IEA;GO:0005524-IEA \\ nucleotide binding-IEA;ATP binding-IEA \\ GO:0005524 \\ ATP binding		AAA+ ATPase domain	TRINITY_DN7408_c0_g1	FvH4_3g33900.1	25.3285	80.2552	54.9267	3.16857	2.25339e-06	0.0130281	mitogen-activated protein kinase 3 \\ 0.00E+00 \\ 98.19 % \\ GO:0000166-IEA;GO:0009409-IEA;GO:0000165-IEA;GO:0005737-IEA;GO:0005737-IBA;GO:0004707-IEA;GO:0010468-IBA;GO:0016310-IEA;GO:0016740-IEA;GO:0016301-IEA;GO:0035556-IBA;GO:0050832-IEA;GO:1901002-IEA	mitogen-activated protein kinase 3 [EC:2.7.11.24]	Protein kinase domain
TRINITY_DN3381_c0_g1	FvH4_6g35140.1	45.1647	166.29	121.125	3.68185	0.00572073	0.47904	protein TIFY 10b-like		Tify domain	TRINITY_DN6528_c0_g1	FvH4_7g22510.1	6.37725	20.2002	13.823	3.16755	0.000108348	0.0663594	PREDICTED: uncharacterized protein LOC101311801 \\ 1.10E-105 \\ 88.24 %		Protein of unknown function PDDEXK-like
TRINITY_DN251_c0_g2	FvH4_6g09510.1	1.25875	4.629	3.37025	3.67746	0.0160973	0.852323	acid phosphatase 1-like		Acid phosphatase, class B-like	TRINITY_DN2355_c0_g1	FvH4_5g18080.1	2.30575	7.2875	4.98175	3.16058	3.69753e-05	0.0404873	probable cyclic nucleotide-gated ion channel 20, chloroplastic isoform X1 \\ 0.00E+00 \\ 83.80 % \\ GO:0055085-IEA;GO:0016020-IEA;GO:0034220-IEA;GO:0016021-IEA;GO:0006811-IEA;GO:0005216-IEA \\ transmembrane transport-IEA;membrane-IEA;ion transmembrane tra	cyclic nucleotide gated channel, plant	Cyclic nucleotide-binding domain
TRINITY_DN321948_c0_g1	FvH4_7g01400.1	13.3045	48.8695	35.565	3.67316	5.55353e-05	0.0390611	hypothetical protein RchiOBHm_Chr1g0317121 \\ 4.40E-09 \\ 96.97 % \\ GO:0046940-IEA;GO:0016310-IEA;GO:0016740-IEA;GO:0016301-IEA;GO:0006139-IEA;GO:0019205-IEA;GO:0005524-IEA;GO:0016776-IEA;GO:0004017-IEA \\ nucleoside monophosphate phosphorylation-IEA;pho			TRINITY_DN14900_c0_g1	FvH4_3g18050.1	22.5983	71.4185	48.8203	3.16036	0.000631692	0.160169	PREDICTED: uncharacterized protein LOC101310586 \\ 4.10E-04 \\ 72.97 % \\ GO:0016020-IEA;GO:0016021-IEA \\ membrane-IEA;integral component of membrane-IEA
TRINITY_DN2646_c0_g1	FvH4_5g37450.1	1.7195	6.2115	4.492	3.61239	0.00124438	0.211448	3,9-dihydroxypterocarpan 6A-monooxygenase-like \\ 0.00E+00 \\ 78.46 % \\ GO:0008195-IBA;GO:0044255-IBA;GO:0030036-IBA;GO:0016311-IEA;GO:0030479-IBA \\ phosphatidate phosphatase activity-IBA;cellular lipid metabolic process-IBA;actin cytoskeleton organizat		Cytochrome P450	TRINITY_DN6262_c0_g1	FvH4_6g07150.1	3.916	12.375	8.459	3.16011	1.80582e-06	0.0126436	calmodulin-binding protein 60 G-like \\ 0.00E+00 \\ 78.43 % \\ GO:0005516-IEA \\ calmodulin binding-IEA \\ GO:0005516 \\ calmodulin binding		CALMODULIN-BINDING PROTEIN60
TRINITY_DN8830_c0_g1	FvH4_1g00420.1	7.4545	26.8707	19.4162	3.60463	0.000344435	0.105932	UDP-glycosyltransferase 74F2-like \\ 0.00E+00 \\ 84.37 % \\ GO:0016757-IEA;GO:0016758-IEA;GO:0016740-IEA \\ transferase activity, transferring glycosyl groups-IEA;transferase activity, transferring hexosyl groups-IEA;transferase activity-IEA \\ GO:0016758	pathogen-inducible salicylic acid glucosyltransferase [EC:2.4.1.-]	UDP-glucuronosyl/UDP-glucosyltransferase	TRINITY_DN10436_c0_g1	FvH4_6g45680.1	0.89775	2.832	1.93425	3.15455	0.00733444	0.583855	tryptophan synthase beta chain 2 \\ 0.00E+00 \\ 87.94 % \\ GO:0030170-IEA;GO:0004834-IEA;GO:0052684-IBA;GO:0000162-IEA;GO:0000162-IBA;GO:0016829-IEA;GO:0006568-IEA \\ pyridoxal phosphate binding-IEA;tryptophan synthase activity-IEA;L-serine hydro-lyase (a	tryptophan synthase beta chain [EC:4.2.1.20]	Pyridoxal-phosphate dependent enzyme
TRINITY_DN177543_c0_g1	FvH4_4g35130.1	5.23875	18.8775	13.6387	3.60344	0.000306284	0.0995434	zinc finger protein 5		Zinc finger C2H2-type	TRINITY_DN22874_c0_g1	FvH4_1g14950.1	0.427	1.34275	0.91575	3.14461	0.0478556	1	methylesterase 10 \\ 0.00E+00 \\ 83.46 % \\ GO:0052689-IEA;GO:0016787-IEA \\ carboxylic ester hydrolase activity-IEA;hydrolase activity-IEA \\ GO:0052689 \\ carboxylic ester hydrolase activity		Alpha/beta hydrolase fold-1
TRINITY_DN14831_c0_g2	FvH4_4g27590.1	1.769	6.37025	4.60125	3.60105	0.000119147	0.0578042	ACD11 homolog protein \\ 0.00E+00 \\ 79.94 % \\ GO:0008152-IEA;GO:0016020-IEA;GO:0016021-IEA;GO:0004553-IEA;GO:0005975-IEA;GO:0016787-IEA;GO:0016798-IEA \\ metabolic process-IEA;membrane-IEA;integral component of membrane-IEA;hydrolase activity, hydrolyzi		Glycolipid transfer protein domain	TRINITY_DN1410_c2_g1	FvH4_6g34000.1	9.08775	28.4855	19.3978	3.13449	0.000622374	0.159116	probable phospholipid-transporting ATPase 4 isoform X2 \\ 0.00E+00 \\ 91.02 % \\ GO:0000166-IEA;GO:0000287-IEA;GO:0045332-IEA;GO:0016020-IEA;GO:0016021-IEA;GO:0015914-IEA;GO:0004012-IEA;GO:0016787-IEA;GO:0005524-IEA \\ nucleotide binding-IEA;magnesium ion	phospholipid-translocating ATPase [EC:3.6.3.1]	P-type ATPase
TRINITY_DN6154_c0_g1	FvH4_1g12460.1	5.27525	18.9423	13.667	3.59078	0.000297355	0.0983956	bifunctional epoxide hydrolase 2-like \\ 0.00E+00 \\ 94.96 % \\ GO:0055085-IEA;GO:0003824-IEA;GO:0016020-IEA;GO:0016021-IEA;GO:0022857-IEA;GO:0004301-IEA;GO:0016787-IEA \\ transmembrane transport-IEA;catalytic activity-IEA;membrane-IEA;integral component		Alpha/beta hydrolase fold-1	TRINITY_DN1057_c0_g3	FvH4_5g05100.1	2.45425	7.69275	5.2385	3.13446	7.67076e-06	0.01953	probable alpha,alpha-trehalose-phosphate synthase [UDP-forming] 9 \\ 0.00E+00 \\ 92.00 % \\ GO:0016757-IEA;GO:0003824-IEA;GO:0003825-IEA;GO:0004805-IEA;GO:0005992-IEA;GO:0016740-IEA;GO:0016311-IEA;GO:0016787-IEA \\ transferase activity, transferring glyco	trehalose 6-phosphate synthase/phosphatase [EC:2.4.1.15 3.1.3.12]	Glycosyl transferase, family 20
TRINITY_DN335_c0_g6	FvH4_c1g00510.1	5.6215	20.0177	14.3962	3.56093	0.0328913	1	cytochrome c oxidase subunit 3 (mitochondrion) \\ 9.90E-168 \\ 97.73 % \\ GO:0004129-IEA;GO:0005739-IEA;GO:0015002-IEA;GO:0016491-IEA;GO:0016020-IEA;GO:0022904-IEA;GO:0016021-IEA;GO:0055114-IEA;GO:1902600-IEA;GO:0019646-IEA;GO:0005743-IEA \\ cytochrome-c	cytochrome c oxidase subunit 3	Cytochrome c oxidase subunit III-like	TRINITY_DN133813_c4_g1	FvH4_6g32890.1	1.10725	3.4675	2.36025	3.13163	0.00228392	0.318519	hypothetical protein RchiOBHm_Chr2g0142321 \\ 2.30E-68 \\ 71.29 % \\ GO:0003700-IEA;GO:0006355-IEA \\ DNA-binding transcription factor activity-IEA;regulation of transcription, DNA-templated-IEA \\ GO:0003700;GO:0006355 \\ DNA-binding transcription factor
TRINITY_DN5299_c0_g1	FvH4_6g18220.1	20.4082	72.4035	51.9952	3.54776	0.000775239	0.162579	IQ domain-containing protein IQM3-like \\ 0.00E+00 \\ 80.41 %		IQ motif, EF-hand binding site	TRINITY_DN15378_c0_g1	FvH4_6g17390.1	2.97425	9.3065	6.33225	3.12902	2.77714e-05	0.0357312	probable glycosyltransferase At5g03795 \\ 0.00E+00 \\ 85.64 % \\ GO:0016757-IEA;GO:0016020-IEA;GO:0016021-IEA;GO:0050508-IEA;GO:0006486-IEA;GO:0016740-IEA;GO:0102983-IEA \\ transferase activity, transferring glycosyl groups-IEA;membrane-IEA;integral compo		Exostosin-like
TRINITY_DN14192_c0_g2	FvH4_6g15580.1	34.6572	122.777	88.12	3.54261	0.000473721	0.127444	peroxidase 21 \\ 0.00E+00 \\ 80.39 % \\ GO:0006979-IEA;GO:0004601-IEA;GO:0004601-IBA;GO:0046872-IEA;GO:0016491-IEA;GO:0020037-IEA;GO:0055114-IEA;GO:0098869-IEA;GO:0009506-IBA;GO:0005576-IEA;GO:0009505-IBA;GO:0042744-IEA \\ response to oxidative stress-IEA	peroxidase [EC:1.11.1.7]	Plant peroxidase	TRINITY_DN46110_c0_g1	FvH4_6g00470.1	119.13	371.276	252.147	3.11657	0.00014925	0.0767602	isopentenyl-diphosphate Delta-isomerase I \\ 1.40E-117 \\ 68.44 % \\ GO:0016310-IEA;GO:0016301-IEA \\ phosphorylation-IEA;kinase activity-IEA	isopentenyl-diphosphate Delta-isomerase [EC:5.3.3.2]	NUDIX hydrolase domain
TRINITY_DN197_c0_g1	FvH4_c3g00230.1	8.99225	31.825	22.8328	3.53916	0.0113551	0.703575	photosystem II CP47 chlorophyll apoprotein (plastid) \\ 0.00E+00 \\ 99.80 % \\ GO:0009507-IEA;GO:0045156-IEA;GO:0016491-IEA;GO:0019684-IEA;GO:0016020-IEA;GO:0018298-IEA;GO:0016021-IEA;GO:0055114-IEA;GO:0015979-IEA;GO:0016168-IEA;GO:0009772-IEA;GO:0009579-	photosystem II CP47 chlorophyll apoprotein	Photosystem antenna protein-like	TRINITY_DN10881_c0_g3	FvH4_7g26070.1	0.9305	2.89775	1.96725	3.11419	0.00233281	0.320871	PREDICTED: uncharacterized protein LOC105353083
TRINITY_DN2660_c0_g1	FvH4_5g38290.1	0.709	2.50525	1.79625	3.5335	0.00609168	0.496603	putative winged helix-turn-helix DNA-binding domain, thioredoxin-like protein \\ 0.00E+00 \\ 81.19 % \\ GO:0003677-IEA;GO:0015035-IEA;GO:0045454-IEA;GO:0009055-IEA;GO:0055114-IEA;GO:0022900-IEA;GO:0035556-IEA;GO:0005623-IEA;GO:0005622-IEA \\ DNA binding-I		Glutaredoxin	TRINITY_DN1244_c0_g1	FvH4_5g19390.1	0.54125	1.68475	1.1435	3.1127	5.3186e-05	0.0479094	probable glycosyltransferase At5g03795 \\ 0.00E+00 \\ 82.18 % \\ GO:0016757-IEA;GO:0016020-IEA;GO:0016021-IEA;GO:0016740-IEA;GO:0006486-IEA \\ transferase activity, transferring glycosyl groups-IEA;membrane-IEA;integral component of membrane-IEA;transfera		Exostosin-like
TRINITY_DN169730_c0_g1	FvH4_7g29880.1	1.101	3.8695	2.7685	3.51453	0.000270726	0.0932914	Transmembrane protein \\ 1.50E-102 \\ 81.41 % \\ GO:0003700-IEA;GO:0006355-IEA;GO:0005634-IEA;GO:0003676-IEA \\ DNA-binding transcription factor activity-IEA;regulation of transcription, DNA-templated-IEA;nucleus-IEA;nucleic acid binding-IEA \\ GO:0003676			TRINITY_DN18847_c1_g2	FvH4_3g26780.1	2.322	7.22725	4.90525	3.11251	0.00678543	0.560425	PREDICTED: uncharacterized protein LOC105350703 \\ 2.00E-85 \\ 77.95 % \\ GO:0016020-IEA;GO:0016021-IEA;GO:0005509-IEA;GO:0016310-IEA;GO:0004672-IEA;GO:0016740-IEA;GO:0030247-IEA;GO:0016301-IEA;GO:0004674-IEA;GO:0005524-IEA;GO:0006468-IEA \\ membrane-IEA;
TRINITY_DN13960_c0_g1	FvH4_4g29850.1	5.839	20.5127	14.6737	3.51306	1.36796e-06	0.00776886	putative methylesterase 11, chloroplastic		Alpha/beta hydrolase fold-1	TRINITY_DN2072_c1_g2	FvH4_2g40740.1	1.11325	3.4645	2.35125	3.11206	9.08736e-05	0.0600761	mitogen-activated protein kinase kinase kinase YODA-like \\ 0.00E+00 \\ 72.54 % \\ GO:0000165-IEA;GO:0000186-IEA;GO:0004709-IEA;GO:0016310-IEA;GO:0016740-IEA;GO:0004672-IEA;GO:0016301-IEA;GO:0005524-IEA;GO:0006468-IEA;GO:0005622-IEA \\ MAPK cascade-IEA;ac		Protein kinase domain
TRINITY_DN8287_c0_g1	FvH4_6g45150.1	30.966	108.458	77.492	3.50249	0.00483614	0.440367	LOB domain-containing protein 41-like \\ 2.90E-83 \\ 96.80 % \\ GO:0009299-IBA;GO:0005634-IBA;GO:0009416-IBA \\ mRNA transcription-IBA;nucleus-IBA;response to light stimulus-IBA \\ GO:0005634;GO:0009299;GO:0009416 \\ nucleus;mRNA transcription;response to		Lateral organ boundaries, LOB	TRINITY_DN17800_c0_g1	FvH4_2g24610.1	2.43825	7.5725	5.13425	3.10571	2.07782e-05	0.0316888	nucleosome assembly protein 1;2
TRINITY_DN140078_c0_g6	FvH4_3g34970.1	1.33325	4.6535	3.32025	3.49034	0.00121754	0.208729	protein UPSTREAM OF FLC \\ 0.00E+00 \\ 81.45 %		Protein of unknown function DUF966	TRINITY_DN13341_c0_g1	FvH4_6g29800.1	1.87825	5.819	3.94075	3.0981	0.00381333	0.413969	cucumber peeling cupredoxin-like		Phytocyanin domain
TRINITY_DN9454_c0_g1	FvH4_2g31960.1	3.44975	12.0267	8.577	3.48627	1.21695e-05	0.0201682	protein REVERSION-TO-ETHYLENE SENSITIVITY1 \\ 0.00E+00 \\ 86.13 % \\ GO:0055085-IEA;GO:0016020-IEA;GO:0016021-IEA;GO:0022857-IEA;GO:0005215-IEA \\ transmembrane transport-IEA;membrane-IEA;integral component of membrane-IEA;transmembrane transporter activi		Protein of unknown function DUF778	TRINITY_DN5897_c0_g1	FvH4_3g39780.1	3.6315	11.2502	7.61875	3.09796	0.0194246	0.977593	PRA1 family protein B1-like \\ 9.20E-94 \\ 53.62 % \\ GO:0005506-IEA;GO:0055085-IEA;GO:0016705-IEA;GO:0016020-IEA;GO:0016021-IEA;GO:0020037-IEA;GO:0055114-IEA \\ iron ion binding-IEA;transmembrane transport-IEA;oxidoreductase activity, acting on paired do	PRA1 family protein 1	Prenylated rab acceptor PRA1
TRINITY_DN13105_c0_g1	FvH4_3g16950.1	3.81025	13.2498	9.4395	3.4774	0.00369367	0.379945	BAHD acyltransferase At5g47980-like \\ 0.00E+00 \\ 71.89 % \\ GO:0016746-IEA;GO:0016747-IEA;GO:0016740-IEA;GO:0050636-IEA \\ transferase activity, transferring acyl groups-IEA;transferase activity, transferring acyl groups other than amino-acyl groups-IEA	shikimate O-hydroxycinnamoyltransferase [EC:2.3.1.133]	Transferase	TRINITY_DN1589_c0_g1	FvH4_1g16870.1	2.87975	8.90675	6.027	3.09289	6.27546e-05	0.0512806	cytochrome P450 81E8-like \\ 0.00E+00 \\ 86.51 % \\ GO:0005506-IEA;GO:0016491-IEA;GO:0016705-IEA;GO:0046872-IEA;GO:0016020-IEA;GO:0016021-IEA;GO:0020037-IEA;GO:0055114-IEA;GO:0004497-IEA \\ iron ion binding-IEA;oxidoreductase activity-IEA;oxidoreductase a		Cytochrome P450
TRINITY_DN15574_c0_g1	FvH4_7g15480.1	2.59775	9.03175	6.434	3.47676	0.000671993	0.151886	late embryogenesis abundant protein At1g64065-like \\ 1.80E-166 \\ 89.59 % \\ GO:0055085-IEA;GO:0016020-IEA;GO:0016021-IEA;GO:0008643-IEA;GO:0022857-IEA \\ transmembrane transport-IEA;membrane-IEA;integral component of membrane-IEA;carbohydrate transport-		Late embryogenesis abundant protein, LEA-14	TRINITY_DN3067_c0_g1	FvH4_5g10410.1	0.39825	1.23075	0.8325	3.0904	0.00619036	0.533308	B3 domain-containing transcription factor NGA1-like \\ 0.00E+00 \\ 66.27 % \\ GO:0003677-IEA;GO:0006351-IEA;GO:0006355-IEA;GO:0005634-IEA \\ DNA binding-IEA;transcription, DNA-templated-IEA;regulation of transcription, DNA-templated-IEA;nucleus-IEA \\ GO:		B3 DNA binding domain
TRINITY_DN12920_c0_g1	FvH4_2g32830.1	13.479	46.7562	33.2772	3.46882	0.0104486	0.671373	Arrestin domain-containing protein \\ 3.30E-67 \\ 59.72 % \\ GO:0003677-IEA;GO:0006355-IEA;GO:0005634-IEA \\ DNA binding-IEA;regulation of transcription, DNA-templated-IEA;nucleus-IEA		Uncharacterised conserved protein UCP031279	TRINITY_DN983_c0_g1	FvH4_3g14250.1	0.74775	2.3105	1.56275	3.08994	0.0109763	0.720497	hypothetical protein RchiOBHm_Chr5g0023481 \\ 6.00E-57 \\ 61.75 % \\ GO:0008150-ND;GO:0016020-IEA;GO:0016021-IEA;GO:0005575-ND;GO:0003674-ND \\ biological_process-ND;membrane-IEA;integral component of membrane-IEA;cellular_component-ND;molecular_function-
TRINITY_DN2647_c0_g1	FvH4_2g40390.1	3.62225	12.5217	8.8995	3.4569	2.73584e-05	0.0258537	protein DA1 \\ 0.00E+00 \\ 88.58 % \\ GO:0046872-IEA \\ metal ion binding-IEA \\ GO:0046872 \\ metal ion binding		Zinc finger, LIM-type	TRINITY_DN9137_c0_g1	FvH4_3g35700.1	0.5645	1.74125	1.17675	3.08459	0.0146194	0.841857	TMV resistance protein N-like \\ 6.40E-163 \\ 75.24 % \\ GO:0007165-IEA;GO:0016020-IEA;GO:0016021-IEA;GO:0043531-IEA;GO:0006334-IEA;GO:0016787-IEA;GO:0005634-IEA \\ signal transduction-IEA;membrane-IEA;integral component of membrane-IEA;ADP binding-IEA;nu		Toll/interleukin-1 receptor homology (TIR) domain
TRINITY_DN2953_c0_g3	FvH4_3g26210.1	2.028	6.987	4.959	3.44527	5.33041e-05	0.0380331	PREDICTED: uncharacterized protein LOC101309119 \\ 0.00E+00 \\ 72.46 % \\ GO:0003677-IEA;GO:0006355-IEA;GO:0005634-IEA \\ DNA binding-IEA;regulation of transcription, DNA-templated-IEA;nucleus-IEA \\ GO:0003677;GO:0005634;GO:0006355 \\ DNA binding;nucleus			TRINITY_DN5465_c0_g1	FvH4_3g05900.1	1.09625	3.3735	2.27725	3.07731	0.0127437	0.780044	hypothetical protein RchiOBHm_Chr5g0013541
TRINITY_DN5465_c0_g1	FvH4_3g05900.1	0.98	3.3735	2.3935	3.44235	0.0109783	0.690769	hypothetical protein RchiOBHm_Chr5g0013541			TRINITY_DN8010_c0_g1	FvH4_1g26700.1	8.52175	26.1773	17.6555	3.07182	4.14187e-05	0.0420505	probable protein phosphatase 2C 49 \\ 0.00E+00 \\ 91.85 % \\ GO:0000166-IEA;GO:0042626-IEA;GO:0055085-IEA;GO:0016020-IEA;GO:0016021-IEA;GO:0042908-IEA;GO:0008559-IEA;GO:0006855-IEA;GO:0016787-IEA;GO:0005524-IEA;GO:0016887-IEA \\ nucleotide binding-IEA;ATP	protein phosphatase PTC2/3 [EC:3.1.3.16]	PPM-type phosphatase, divalent cation binding
TRINITY_DN18665_c0_g1	FvH4_7g25440.1	15.433	53.092	37.659	3.44016	0.0135784	0.777685	wound-induced protein 1 \\ 0.00E+00 \\ 94.26 % \\ GO:0000166-IEA;GO:0045261-IEA;GO:0046034-IEA;GO:1902600-IEA;GO:0005524-IEA;GO:0046933-IEA;GO:0016787-IEA;GO:0099132-IEA;GO:0015986-IEA;GO:0006754-IEA \\ nucleotide binding-IEA;proton-transporting ATP synth		Wound-induced protein Wun1-like	TRINITY_DN21090_c0_g3	FvH4_2g16450.1	1.932	5.90925	3.97725	3.05862	3.23957e-05	0.0378217	probable flavin-containing monooxygenase 1 \\ 0.00E+00 \\ 93.46 % \\ GO:0050660-IEA;GO:0016491-IEA;GO:0050661-IEA;GO:0055114-IEA;GO:0004497-IEA;GO:0004499-IEA \\ flavin adenine dinucleotide binding-IEA;oxidoreductase activity-IEA;NADP binding-IEA;oxidatio	dimethylaniline monooxygenase (N-oxide forming) [EC:1.14.13.8]	Flavin monooxygenase FMO
TRINITY_DN2348_c2_g1	FvH4_6g42870.1	3.4535	11.8755	8.422	3.43869	0.000749168	0.160558	probable WRKY transcription factor 31 \\ 0.00E+00 \\ 80.55 % \\ GO:0003677-IEA;GO:0003700-IEA;GO:0006355-IEA;GO:0043565-IEA;GO:0005634-IEA \\ DNA binding-IEA;DNA-binding transcription factor activity-IEA;regulation of transcription, DNA-templated-IEA;sequ		WRKY domain	TRINITY_DN6432_c0_g1	FvH4_3g04380.1	21.455	65.4815	44.0265	3.05204	0.0379007	1	hypothetical protein RchiOBHm_Chr5g0006781
TRINITY_DN3067_c0_g1	FvH4_5g10410.1	0.3585	1.23075	0.87225	3.43305	0.00583566	0.484652	B3 domain-containing transcription factor NGA1-like \\ 0.00E+00 \\ 66.27 % \\ GO:0003677-IEA;GO:0006351-IEA;GO:0006355-IEA;GO:0005634-IEA \\ DNA binding-IEA;transcription, DNA-templated-IEA;regulation of transcription, DNA-templated-IEA;nucleus-IEA \\ GO:		B3 DNA binding domain	TRINITY_DN17106_c0_g2	FvH4_6g10350.1	1.2375	3.7745	2.537	3.0501	0.0087196	0.635018	protein LURP-one-related 10-like \\ 0.00E+00 \\ 77.27 % \\ GO:0007165-IEA;GO:0043531-IEA;GO:0016787-IEA \\ signal transduction-IEA;ADP binding-IEA;hydrolase activity-IEA \\ GO:0007165;GO:0016787;GO:0043531 \\ signal transduction;hydrolase activity;ADP bin		LURP-one-related
TRINITY_DN191_c0_g3	FvH4_1g30150.1	2.61175	8.91675	6.305	3.41409	0.000569433	0.141491	aspartic proteinase PCS1 \\ 0.00E+00 \\ 83.63 % \\ GO:0004190-IEA;GO:0008233-IEA;GO:0006508-IEA;GO:0016787-IEA \\ aspartic-type endopeptidase activity-IEA;peptidase activity-IEA;proteolysis-IEA;hydrolase activity-IEA \\ GO:0004190;GO:0006508 \\ aspartic-t		Aspartic peptidase A1 family	TRINITY_DN4694_c1_g1	FvH4_3g08740.1	1.742	5.30525	3.56325	3.04549	0.000809798	0.182631	MACPF domain-containing protein NSL1 \\ 0.00E+00 \\ 87.44 % \\ GO:0006955-IBA;GO:0009626-IBA;GO:0005886-IBA \\ immune response-IBA;plant-type hypersensitive response-IBA;plasma membrane-IBA \\ GO:0005886;GO:0009626 \\ plasma membrane;plant-type hypersensi		Membrane attack complex component/perforin (MACPF) domain
TRINITY_DN253_c0_g1	FvH4_5g21040.1	53.1043	180.765	127.661	3.40397	0.000309063	0.0999086	dynamin-related protein 1E-like \\ 0.00E+00 \\ 92.51 % \\ GO:0000266-IBA;GO:0005525-IEA;GO:0000166-IEA;GO:0005737-IBA;GO:0003924-IEA;GO:0003924-IBA;GO:0016020-IBA;GO:0008017-IBA \\ mitochondrial fission-IBA;GTP binding-IEA;nucleotide binding-IEA;cytoplasm		Dynamin central domain	TRINITY_DN4328_c1_g1	FvH4_6g13200.1	12.2745	37.3525	25.078	3.0431	8.35448e-05	0.0582374	L-type lectin-domain containing receptor kinase IV.1-like \\ 0.00E+00 \\ 90.52 % \\ GO:0016020-IEA;GO:0016021-IEA;GO:0016740-IEA;GO:0004672-IEA;GO:0030246-IEA;GO:0005524-IEA;GO:0006468-IEA \\ membrane-IEA;integral component of membrane-IEA;transferase act		Protein kinase domain
TRINITY_DN1308_c0_g2	FvH4_4g28030.1	4.6185	15.7032	11.0847	3.40008	0.00656876	0.517407	AP2/ERF and B3 domain-containing transcription factor RAV1 \\ 1.00E-102 \\ 87.43 % \\ GO:0016874-IEA;GO:0009536-IEA \\ ligase activity-IEA;plastid-IEA \\ GO:0009536;GO:0016874 \\ plastid;ligase activity	RAV-like factor	AP2/ERF domain	TRINITY_DN425_c0_g4	FvH4_5g26740.1	1.73775	5.28625	3.5485	3.04201	0.00339356	0.389223	protein LYK5 \\ 0.00E+00 \\ 72.56 % \\ GO:0016020-IEA;GO:0016021-IEA;GO:0016310-IEA;GO:0004672-IEA;GO:0016740-IEA;GO:0016301-IEA;GO:0005524-IEA;GO:0006468-IEA \\ membrane-IEA;integral component of membrane-IEA;phosphorylation-IEA;protein kinase activity-I		Protein kinase domain
TRINITY_DN5898_c0_g1	FvH4_5g11890.1	0.6275	2.1295	1.502	3.39363	5.90105e-05	0.040309	cysteine-rich receptor-like protein kinase 10 \\ 1.60E-143 \\ 88.27 % \\ GO:0004672-IEA;GO:0016740-IEA;GO:0004674-IBA;GO:0005524-IEA;GO:0006468-IEA;GO:0006468-IBA;GO:0005886-IBA \\ protein kinase activity-IEA;transferase activity-IEA;protein serine/threon		Protein kinase domain	TRINITY_DN990_c0_g1	FvH4_7g23160.1	13.4868	40.9967	27.51	3.03978	0.00184808	0.282001	wall-associated receptor kinase-like 20 \\ 0.00E+00 \\ 92.43 % \\ GO:0016020-IEA;GO:0016021-IEA;GO:0016310-IEA;GO:0004672-IEA;GO:0016740-IEA;GO:0030247-IEA;GO:0016301-IEA;GO:0005524-IEA;GO:0006468-IEA \\ membrane-IEA;integral component of membrane-IEA;pho		Protein kinase domain
TRINITY_DN1376_c0_g3	FvH4_1g18500.1	1.54	5.2225	3.6825	3.39123	0.000620462	0.146871	transcription factor RAX3-like \\ 0.00E+00 \\ 73.10 % \\ GO:0003677-IEA;GO:0044212-IBA;GO:0030154-IBA;GO:0043565-IBA;GO:0005634-IBA \\ DNA binding-IEA;transcription regulatory region DNA binding-IBA;cell differentiation-IBA;sequence-specific DNA binding-I	transcription factor MYB, plant	SANT/Myb domain	TRINITY_DN16445_c0_g1	FvH4_7g02560.1	3.01575	9.1225	6.10675	3.02495	2.89399e-06	0.013425	aspartic proteinase-like protein 2 \\ 0.00E+00 \\ 85.21 % \\ GO:0004190-IEA;GO:0004190-IBA;GO:0008233-IEA;GO:0006508-IEA;GO:0006508-IBA;GO:0016020-IEA;GO:0016021-IEA;GO:0030163-IBA;GO:0016787-IEA \\ aspartic-type endopeptidase activity-IEA;aspartic-type e		Aspartic peptidase A1 family
TRINITY_DN232813_c0_g1	FvH4_7g08390.1	0.87125	2.951	2.07975	3.38709	0.0165175	0.862464	putative germin-like protein 9-2 \\ 1.20E-27 \\ 52.82 % \\ GO:0008289-IEA \\ lipid binding-IEA		Germin	TRINITY_DN15333_c0_g1	FvH4_4g33190.1	3.02025	9.1165	6.09625	3.01846	0.00187267	0.283775	U-box domain-containing protein 21-like \\ 0.00E+00 \\ 80.33 % \\ GO:0008152-IEA;GO:0000981-IEA;GO:0008270-IEA;GO:0006355-IEA;GO:0004553-IEA;GO:0016787-IEA;GO:0016798-IEA;GO:0005975-IEA;GO:0005634-IEA;GO:0006357-IEA \\ metabolic process-IEA;DNA-binding tr		U box domain
TRINITY_DN6193_c0_g1	FvH4_3g22710.1	1.032	3.47425	2.44225	3.36652	0.00240038	0.303566	NEP1-interacting protein-like 1		Zinc finger, RING-type	TRINITY_DN14342_c0_g1	FvH4_5g26600.1	13.3532	40.28	26.9268	3.01649	0.000551302	0.151372	Poly polymerase 1, putative \\ 9.90E-04 \\ 74.42 % \\ GO:0008152-IEA;GO:0016020-IEA;GO:0016798-IEA;GO:0016787-IEA \\ metabolic process-IEA;membrane-IEA;hydrolase activity, acting on glycosyl bonds-IEA;hydrolase activity-IEA		Protein of unknown function DUF4228, plant
TRINITY_DN12754_c0_g1	FvH4_5g17240.1	2.783	9.35375	6.57075	3.36103	0.035766	1	probable calcium-binding protein CML27 \\ 2.00E-111 \\ 85.32 % \\ GO:0005509-IEA \\ calcium ion binding-IEA \\ GO:0005509 \\ calcium ion binding		EF-hand domain	TRINITY_DN140078_c0_g6	FvH4_3g34970.1	1.54825	4.6535	3.10525	3.00565	0.00157825	0.260703	protein UPSTREAM OF FLC \\ 0.00E+00 \\ 81.45 %		Protein of unknown function DUF966
TRINITY_DN1946_c0_g1	FvH4_2g30840.1	1.7905	6.0055	4.215	3.35409	0.00228133	0.295179	serine/threonine-protein kinase At5g01020 \\ 0.00E+00 \\ 79.98 % \\ GO:0016310-IEA;GO:0016740-IEA;GO:0004672-IEA;GO:0016301-IEA;GO:0005524-IEA;GO:0006468-IEA \\ phosphorylation-IEA;transferase activity-IEA;protein kinase activity-IEA;kinase activity-IEA;A		Protein kinase domain	TRINITY_DN3549_c0_g1	FvH4_6g28410.1	12.2327	36.7345	24.5018	3.00296	0.0017537	0.274602	shikimate O-hydroxycinnamoyltransferase-like \\ 3.20E-102 \\ 91.32 % \\ GO:0010252-IEA;GO:0016746-IEA;GO:0016747-IEA;GO:0005737-IEA;GO:0005829-IEA;GO:0009809-IEA;GO:0016020-IEA;GO:0016021-IEA;GO:0009963-IEA;GO:0047205-IEA;GO:0016740-IEA;GO:0047172-IEA \\	shikimate O-hydroxycinnamoyltransferase [EC:2.3.1.133]	Transferase
TRINITY_DN3179_c0_g1	FvH4_3g16430.1	3.2335	10.8227	7.58925	3.34707	0.00198601	0.275836	MLO-like protein 1 \\ 0.00E+00 \\ 84.41 % \\ GO:0009607-IEA;GO:0005516-IEA;GO:0016020-IEA;GO:0016021-IEA;GO:0006952-IEA \\ response to biotic stimulus-IEA;calmodulin binding-IEA;membrane-IEA;integral component of membrane-IEA;defense response-IEA \\ GO:00	mlo protein	Mlo-related protein	TRINITY_DN1537_c0_g7	FvH4_2g32120.1	6.848	20.4793	13.6313	2.99054	2.46507e-05	0.0336024	ferrochelatase-2, chloroplastic \\ 0.00E+00 \\ 86.13 % \\ GO:0006979-IEA;GO:0006779-IEA;GO:0009507-IEA;GO:0005739-IEA;GO:0016020-IEA;GO:0016829-IEA;GO:0016021-IEA;GO:0006783-IEA;GO:0033014-IEA;GO:0004325-IEA;GO:0009536-IEA \\ response to oxidative stress-	protoporphyrin/coproporphyrin ferrochelatase [EC:4.99.1.1 4.99.1.9]	Ferrochelatase
TRINITY_DN7470_c0_g1	FvH4_2g18040.1	2.09275	6.9745	4.88175	3.3327	0.00758478	0.561854	serine/threonine-protein kinase OXI1 \\ 0.00E+00 \\ 83.64 % \\ GO:0003677-IEA;GO:0006355-IEA;GO:0005634-IEA \\ DNA binding-IEA;regulation of transcription, DNA-templated-IEA;nucleus-IEA \\ GO:0003677;GO:0005634;GO:0006355 \\ DNA binding;nucleus;regulation	serine/threonine-protein kinase OXI1 [EC:2.7.11.1]	Protein kinase domain	TRINITY_DN5792_c0_g1	FvH4_6g53130.1	2.2205	6.6375	4.417	2.98919	0.000659958	0.162261	probable adenylate kinase 7, mitochondrial \\ 1.10E-120 \\ 74.63 % \\ GO:0003676-IEA \\ nucleic acid binding-IEA \\ GO:0003676 \\ nucleic acid binding	adenylate kinase [EC:2.7.4.3]	Adenylate kinase/UMP-CMP kinase
TRINITY_DN78_c0_g1	FvH4_6g31020.1	0.8675	2.88475	2.01725	3.32536	0.0109827	0.69078	coatomer subunit beta'-1-like \\ 2.60E-07 \\ 89.61 % \\ GO:0003677-IEA;GO:0008270-IEA;GO:0005634-IEA;GO:0003676-IEA \\ DNA binding-IEA;zinc ion binding-IEA;nucleus-IEA;nucleic acid binding-IEA	coatomer subunit beta'	WD40 repeat	TRINITY_DN1214_c0_g1	FvH4_5g10190.1	15.6037	46.485	30.8813	2.97909	0.00182479	0.279742	Actin-related protein \\ 0.00E+00 \\ 99.38 % \\ GO:0000166-IEA;GO:0005524-IEA \\ nucleotide binding-IEA;ATP binding-IEA \\ GO:0005524 \\ ATP binding		Actin family
TRINITY_DN1206_c0_g3	FvH4_6g27940.1	14.2355	47.338	33.1025	3.32535	0.00485273	0.441127	4-coumarate--CoA ligase 1-like \\ 0.00E+00 \\ 92.74 % \\ GO:0016207-IEA;GO:0003824-IEA;GO:0016874-IEA \\ 4-coumarate-CoA ligase activity-IEA;catalytic activity-IEA;ligase activity-IEA \\ GO:0016207 \\ 4-coumarate-CoA ligase activity	4-coumarate--CoA ligase [EC:6.2.1.12]	AMP-dependent synthetase/ligase	TRINITY_DN21931_c0_g1	FvH4_1g18210.1	2.03375	6.04425	4.0105	2.97197	0.000423185	0.134151	hypothetical protein RchiOBHm_Chr2g0108721 \\ 6.30E-93 \\ 57.13 %
TRINITY_DN450_c3_g1	FvH4_3g17550.1	11.9497	39.7183	27.7685	3.32377	0.00182897	0.263417	7-deoxyloganetin glucosyltransferase-like \\ 0.00E+00 \\ 83.83 % \\ GO:0016757-IEA;GO:0016758-IEA;GO:0016740-IEA \\ transferase activity, transferring glycosyl groups-IEA;transferase activity, transferring hexosyl groups-IEA;transferase activity-IEA \\ GO		UDP-glucuronosyl/UDP-glucosyltransferase	TRINITY_DN9788_c1_g1	FvH4_3g08790.1	1.0005	2.96725	1.96675	2.96577	0.00298409	0.362646	ethylene-responsive transcription factor 12 \\ 2.10E-105 \\ 75.05 % \\ GO:0003677-IEA;GO:0003700-IEA;GO:0006351-IEA;GO:0006355-IEA;GO:0005634-IEA \\ DNA binding-IEA;DNA-binding transcription factor activity-IEA;transcription, DNA-templated-IEA;regulation		AP2/ERF domain
TRINITY_DN7408_c0_g1	FvH4_3g33900.1	24.2353	80.2552	56.02	3.31151	3.38436e-06	0.0119605	mitogen-activated protein kinase 3 \\ 0.00E+00 \\ 98.19 % \\ GO:0000166-IEA;GO:0009409-IEA;GO:0000165-IEA;GO:0005737-IEA;GO:0005737-IBA;GO:0004707-IEA;GO:0010468-IBA;GO:0016310-IEA;GO:0016740-IEA;GO:0016301-IEA;GO:0035556-IBA;GO:0050832-IEA;GO:1901002-IEA	mitogen-activated protein kinase 3 [EC:2.7.11.24]	Protein kinase domain	TRINITY_DN12929_c0_g1	FvH4_4g16130.1	4.98525	14.7625	9.77725	2.96124	8.86178e-05	0.0598855	putative ribosomal-protein-alanine acetyltransferase		GNAT domain
TRINITY_DN10325_c0_g5	FvH4_6g06490.1	0.4135	1.36725	0.95375	3.30653	0.00135759	0.221874	respiratory burst oxidase homolog protein B \\ 0.00E+00 \\ 89.52 % \\ GO:0050664-IEA;GO:0004601-IEA;GO:0016491-IEA;GO:0016174-IEA;GO:0016020-IEA;GO:0016021-IEA;GO:0005509-IEA;GO:0055114-IEA;GO:0098869-IEA \\ oxidoreductase activity, acting on NAD(P)H, oxy	respiratory burst oxidase [EC:1.6.3.- 1.11.1.-]	Cytochrome b245, heavy chain	TRINITY_DN3418_c0_g2	FvH4_3g41270.1	3.236	9.568	6.332	2.95674	7.63815e-05	0.0556309	calcium uniporter protein 6, mitochondrial-like \\ 0.00E+00 \\ 84.55 % \\ GO:0005739-IEA;GO:0016020-IEA;GO:0051560-IEA;GO:0016021-IEA \\ mitochondrion-IEA;membrane-IEA;mitochondrial calcium ion homeostasis-IEA;integral component of membrane-IEA \\ GO:0005		Coiled-coil domain containing protein 109, C-terminal
TRINITY_DN15361_c0_g1	FvH4_6g06470.1	0.44975	1.486	1.03625	3.30406	0.00377488	0.383425	luminal-binding protein 5-like \\ 0.00E+00 \\ 93.97 % \\ GO:0000166-IEA;GO:0009860-IEA;GO:0016592-IEA;GO:0005524-IEA \\ nucleotide binding-IEA;pollen tube growth-IEA;mediator complex-IEA;ATP binding-IEA \\ GO:0005524;GO:0009860;GO:0016592 \\ ATP binding;p	heat shock 70kDa protein 5	Heat shock protein 70 family	TRINITY_DN38262_c0_g1	FvH4_5g19250.1	23.884	70.6052	46.7212	2.95617	0.0114931	0.739801	3-isopropylmalate dehydratase small subunit 3-like \\ 1.50E-34 \\ 90.94 % \\ GO:0005739-IEA;GO:0046872-IEA;GO:0042719-IEA;GO:0015031-IEA;GO:0045039-IEA;GO:0008566-IEA;GO:0042721-IEA;GO:0016787-IEA \\ mitochondrion-IEA;metal ion binding-IEA;mitochondrial i	3-isopropylmalate/(R)-2-methylmalate dehydratase small subunit [EC:4.2.1.33 4.2.1.35]	Aconitase A/isopropylmalate dehydratase small subunit, swivel domain
TRINITY_DN9577_c0_g1	FvH4_2g40150.1	20.4013	67.2922	46.891	3.29844	0.0148137	0.816522	anthocyanidin 3-O-glucosyltransferase 5-like	hydroquinone glucosyltransferase [EC:2.4.1.218]	UDP-glucuronosyl/UDP-glucosyltransferase	TRINITY_DN1087_c0_g2	FvH4_3g36720.1	13.3588	39.4372	26.0785	2.95217	0.00837395	0.621195	scarecrow-like protein 30 \\ 0.00E+00 \\ 76.10 %		Transcription factor GRAS
TRINITY_DN20198_c0_g1	FvH4_3g07830.1	0.49325	1.623	1.12975	3.29042	3.00804e-05	0.0270762	heavy metal-associated isoprenylated plant protein 20-like \\ 1.40E-18 \\ 81.64 % \\ GO:0007165-IEA;GO:0016020-IEA;GO:0016021-IEA;GO:0043531-IEA;GO:0016787-IEA \\ signal transduction-IEA;membrane-IEA;integral component of membrane-IEA;ADP binding-IEA;hydr		Heavy metal-associated domain, HMA	TRINITY_DN4172_c0_g2	FvH4_7g04980.1	0.5535	1.631	1.0775	2.9467	0.00250646	0.333549	PREDICTED: uncharacterized protein LOC101290890 \\ 3.90E-69 \\ 89.69 % \\ GO:0006506-IEA;GO:0016757-IEA;GO:0016020-IEA;GO:0016021-IEA;GO:0017176-IEA;GO:0016740-IEA \\ GPI anchor biosynthetic process-IEA;transferase activity, transferring glycosyl groups-I
TRINITY_DN21090_c0_g3	FvH4_2g16450.1	1.799	5.90925	4.11025	3.28474	2.8117e-05	0.0261692	probable flavin-containing monooxygenase 1 \\ 0.00E+00 \\ 93.46 % \\ GO:0050660-IEA;GO:0016491-IEA;GO:0050661-IEA;GO:0055114-IEA;GO:0004497-IEA;GO:0004499-IEA \\ flavin adenine dinucleotide binding-IEA;oxidoreductase activity-IEA;NADP binding-IEA;oxidatio	dimethylaniline monooxygenase (N-oxide forming) [EC:1.14.13.8]	Flavin monooxygenase FMO	TRINITY_DN21511_c0_g1	FvH4_2g05060.1	0.7555	2.22525	1.46975	2.9454	0.000306366	0.113032	putative UDP-glucose glucosyltransferase \\ 0.00E+00 \\ 88.97 % \\ GO:0016757-IEA;GO:0016758-IEA;GO:0016740-IEA \\ transferase activity, transferring glycosyl groups-IEA;transferase activity, transferring hexosyl groups-IEA;transferase activity-IEA \\ GO:		UDP-glucuronosyl/UDP-glucosyltransferase
TRINITY_DN6573_c0_g1	FvH4_4g24540.1	17.4795	57.4075	39.928	3.28428	0.00318425	0.348852	b12d protein \\ 9.60E-22 \\ 90.54 % \\ GO:0016020-IEA;GO:0016021-IEA \\ membrane-IEA;integral component of membrane-IEA \\ GO:0016021 \\ integral component of membrane			TRINITY_DN5731_c0_g1	FvH4_6g50280.1	3.688	10.852	7.164	2.94252	8.98247e-06	0.0211239	xyloglucan glycosyltransferase 4-like \\ 0.00E+00 \\ 92.64 % \\ GO:0016757-IEA;GO:0016020-IEA;GO:0016021-IEA;GO:0016760-IEA;GO:0016740-IEA \\ transferase activity, transferring glycosyl groups-IEA;membrane-IEA;integral component of membrane-IEA;cellulose	xyloglucan glycosyltransferase 4 [EC:2.4.1.-]	Glycosyltransferase 2-like
TRINITY_DN1980_c0_g3	FvH4_2g28420.1	0.4975	1.6315	1.134	3.2794	0.020255	0.963553	TPA_inf: RNA-dependent RNA polymerase \\ 1.10E-25 \\ 68.40 % \\ GO:0090502-IEA;GO:0005739-IEA;GO:0003968-IEA;GO:0001172-IEA;GO:0004523-IEA;GO:0003676-IEA \\ RNA phosphodiester bond hydrolysis, endonucleolytic-IEA;mitochondrion-IEA;RNA-directed 5'-3' RNA p			TRINITY_DN2348_c2_g1	FvH4_6g42870.1	4.044	11.8755	7.8315	2.93657	0.00127664	0.233899	probable WRKY transcription factor 31 \\ 0.00E+00 \\ 80.55 % \\ GO:0003677-IEA;GO:0003700-IEA;GO:0006355-IEA;GO:0043565-IEA;GO:0005634-IEA \\ DNA binding-IEA;DNA-binding transcription factor activity-IEA;regulation of transcription, DNA-templated-IEA;sequ		WRKY domain
TRINITY_DN510_c0_g1	FvH4_7g14400.1	1.37675	4.4995	3.12275	3.2682	3.34427e-05	0.0289402	kinase RLK-Pelle-LRR-XII-1 family \\ 0.00E+00 \\ 81.71 % \\ GO:0000166-IEA;GO:0016020-IEA;GO:0016021-IEA;GO:0016310-IEA;GO:0004672-IEA;GO:0016740-IEA;GO:0016301-IEA;GO:0004674-IEA;GO:0005524-IEA;GO:0006468-IEA \\ nucleotide binding-IEA;membrane-IEA;integr		Protein kinase domain	TRINITY_DN12460_c0_g2	FvH4_3g40260.1	2.81775	8.2705	5.45275	2.93514	0.00101189	0.205675	CBL-interacting serine/threonine-protein kinase 11 \\ 0.00E+00 \\ 88.15 % \\ GO:0000166-IEA;GO:0007165-IEA;GO:0016310-IEA;GO:0016740-IEA;GO:0004672-IEA;GO:0016301-IEA;GO:0004674-IEA;GO:0005524-IEA;GO:0006468-IEA \\ nucleotide binding-IEA;signal transducti	carbon catabolite-derepressing protein kinase [EC:2.7.11.1]	Protein kinase domain
TRINITY_DN263161_c0_g1	FvH4_3g34010.1	5.23625	17.0702	11.834	3.26001	0.0159683	0.849775	hypothetical protein RchiOBHm_Chr5g0061631 \\ 5.80E-25 \\ 55.60 % \\ GO:0016491-IEA;GO:0008177-IEA;GO:0016020-IEA;GO:0016021-IEA;GO:0055114-IEA \\ oxidoreductase activity-IEA;succinate dehydrogenase (ubiquinone) activity-IEA;membrane-IEA;integral componen			TRINITY_DN8530_c0_g1	FvH4_3g15320.1	1.95475	5.73175	3.777	2.93222	0.000652114	0.161753	transcription factor MYB63 \\ 0.00E+00 \\ 61.65 % \\ GO:0003677-IEA;GO:0030154-IBA;GO:0044212-IBA;GO:0043565-IBA;GO:0005634-IBA \\ DNA binding-IEA;cell differentiation-IBA;transcription regulatory region DNA binding-IBA;sequence-specific DNA binding-IBA;n	transcription factor MYB, plant	SANT/Myb domain
TRINITY_DN2655_c1_g1	FvH4_7g13890.1	9.1745	29.902	20.7275	3.25925	2.87919e-05	0.0263985	FT-interacting protein 1-like \\ 0.00E+00 \\ 91.50 % \\ GO:0016757-IEA;GO:0016020-IEA;GO:0016021-IEA;GO:0016740-IEA \\ transferase activity, transferring glycosyl groups-IEA;membrane-IEA;integral component of membrane-IEA;transferase activity-IEA \\ GO:00		C2 domain	TRINITY_DN28769_c0_g3	FvH4_6g23840.1	0.34525	1.00875	0.6635	2.9218	0.00198063	0.292623	rust resistance kinase Lr10-like \\ 0.00E+00 \\ 75.77 % \\ GO:0016020-IEA;GO:0016021-IEA;GO:0016310-IEA;GO:0004672-IEA;GO:0016301-IEA;GO:0008889-IEA;GO:0005524-IEA;GO:0016787-IEA;GO:0006468-IEA \\ membrane-IEA;integral component of membrane-IEA;phosphoryl		Protein kinase domain
TRINITY_DN4785_c0_g1	FvH4_5g18190.1	0.50075	1.629	1.12825	3.25312	0.00640948	0.509698	Nucleotide-diphospho-sugar transferase \\ 0.00E+00 \\ 77.74 % \\ GO:0003677-IEA;GO:0008270-IEA;GO:0004803-IEA;GO:0016020-IEA;GO:0016021-IEA;GO:0016740-IEA;GO:0006313-IEA \\ DNA binding-IEA;zinc ion binding-IEA;transposase activity-IEA;membrane-IEA;integra		Nucleotide-diphospho-sugar transferase	TRINITY_DN4519_c1_g1	FvH4_6g27580.1	8.52	24.8155	16.2955	2.91262	0.00971002	0.676017	phospholipase A1-IIdelta-like \\ 0.00E+00 \\ 84.35 % \\ GO:0008970-IEA;GO:0006629-IEA;GO:0016787-IEA \\ phospholipase A1 activity-IEA;lipid metabolic process-IEA;hydrolase activity-IEA \\ GO:0006629;GO:0008970 \\ lipid metabolic process;phospholipase A1 a		Fungal lipase-like domain
TRINITY_DN16703_c0_g1	FvH4_6g28280.1	1.0385	3.37725	2.33875	3.25205	0.0103654	0.668748	organic cation/carnitine transporter 4 \\ 0.00E+00 \\ 87.43 % \\ GO:0055085-IEA;GO:0016020-IEA;GO:0016021-IEA;GO:0008643-IEA;GO:0022857-IEA;GO:0005215-IEA \\ transmembrane transport-IEA;membrane-IEA;integral component of membrane-IEA;carbohydrate transpor		Major facilitator, sugar transporter-like	TRINITY_DN379_c0_g1	FvH4_3g35050.1	0.6955	2.01325	1.31775	2.89468	0.021351	1	zinc finger protein ZAT12-like \\ 2.30E-07 \\ 80.27 % \\ GO:0000166-IEA;GO:0006812-IEA;GO:0019829-IEA;GO:0016020-IEA;GO:0016021-IEA;GO:0016787-IEA;GO:0099132-IEA \\ nucleotide binding-IEA;cation transport-IEA;cation-transporting ATPase activity-IEA;membra		Zinc finger C2H2-type
TRINITY_DN3119_c0_g1	FvH4_6g17290.1	2.6315	8.5455	5.914	3.24739	0.00132127	0.218137	aspartic proteinase-like protein 2 \\ 8.20E-155 \\ 92.65 % \\ GO:0004190-IEA;GO:0008233-IEA;GO:0006508-IEA;GO:0016020-IEA;GO:0016021-IEA;GO:0016787-IEA \\ aspartic-type endopeptidase activity-IEA;peptidase activity-IEA;proteolysis-IEA;membrane-IEA;integra		Aspartic peptidase A1 family	TRINITY_DN3578_c0_g1	FvH4_6g23260.1	1.7865	5.17125	3.38475	2.89463	2.05942e-05	0.0315645	putative EGF-like domain, exostosin \\ 0.00E+00 \\ 91.12 % \\ GO:0016757-IEA;GO:0016020-IEA;GO:0010409-IEA;GO:0016021-IEA;GO:0080147-IEA;GO:0006486-IEA;GO:0005794-IEA \\ transferase activity, transferring glycosyl groups-IEA;membrane-IEA;extensin metaboli		EGF-like domain
TRINITY_DN1135_c0_g1	FvH4_6g24790.1	37.5397	121.547	84.0077	3.23783	0.00195972	0.273585	protein EARLY RESPONSIVE TO DEHYDRATION 15-like isoform X1 \\ 1.30E-85 \\ 85.38 % \\ GO:0003964-IEA;GO:0016779-IEA;GO:0008270-IEA;GO:0016020-IEA;GO:0016021-IEA;GO:0006278-IEA;GO:0043531-IEA;GO:0015074-IEA;GO:0000943-IEA;GO:0016740-IEA;GO:0003676-IEA \\ RN		Ataxin-2, C-terminal	TRINITY_DN8726_c0_g1	FvH4_3g14420.1	3.662	10.592	6.93	2.89241	0.0118389	0.750146	---NA--- \\ 4.10E-81 \\ 80.71 % \\ GO:0008270-IEA;GO:0046872-IEA;GO:0016818-IEA;GO:0016310-IEA;GO:0004683-IEA;GO:0004386-IEA;GO:0016740-IEA;GO:0016301-IEA;GO:0005524-IEA;GO:0016787-IEA;GO:0003676-IEA;GO:0006468-IEA \\ zinc ion binding-IEA;metal ion bindin
TRINITY_DN11100_c0_g1	FvH4_4g32790.1	1.18125	3.821	2.63975	3.23471	0.00155474	0.241416	U-box domain-containing protein 35 \\ 1.10E-81 \\ 68.09 % \\ GO:0016787-IEA \\ hydrolase activity-IEA		UspA	TRINITY_DN1308_c0_g2	FvH4_4g28030.1	5.4435	15.7032	10.2597	2.88477	0.0107911	0.714541	AP2/ERF and B3 domain-containing transcription factor RAV1 \\ 1.00E-102 \\ 87.43 % \\ GO:0016874-IEA;GO:0009536-IEA \\ ligase activity-IEA;plastid-IEA \\ GO:0009536;GO:0016874 \\ plastid;ligase activity	RAV-like factor	AP2/ERF domain
TRINITY_DN304172_c0_g1	FvH4_2g33050.1	3.621	11.6807	8.05975	3.22584	2.71899e-05	0.0258537	PREDICTED: uncharacterized protein LOC105349827			TRINITY_DN177543_c0_g1	FvH4_4g35130.1	6.55525	18.8775	12.3222	2.87975	0.000849988	0.187307	zinc finger protein 5		Zinc finger C2H2-type
TRINITY_DN24392_c0_g1	FvH4_3g07280.1	1.05675	3.38575	2.329	3.20393	0.0102118	0.663834	hypothetical protein Pyn_19849 \\ 1.80E-88 \\ 82.02 % \\ GO:0052689-IEA;GO:0006629-IEA;GO:0016020-IEA;GO:0016021-IEA;GO:0016787-IEA \\ carboxylic ester hydrolase activity-IEA;lipid metabolic process-IEA;membrane-IEA;integral component of membrane-IEA;hydr			TRINITY_DN267307_c0_g1	FvH4_3g01720.1	0.432	1.2415	0.8095	2.87384	0.00361301	0.402408	mitogen-activated protein kinase kinase kinase NPK1-like	mitogen-activated protein kinase kinase kinase 17/18	Protein kinase domain
TRINITY_DN2782_c0_g2	FvH4_2g38320.1	3.2655	10.4435	7.178	3.19813	0.0192268	0.937363	thaumatin-like protein 1b \\ 2.70E-156 \\ 92.37 %		Thaumatin	TRINITY_DN10670_c0_g1	FvH4_6g54240.1	12.7977	36.7137	23.916	2.86877	1.58777e-06	0.0123621	aspartokinase 2, chloroplastic isoform X1 \\ 0.00E+00 \\ 92.11 % \\ GO:0004072-IEA;GO:0009089-IEA;GO:0009088-IEA;GO:0016310-IEA;GO:0016740-IEA;GO:0008652-IEA;GO:0016301-IEA \\ aspartate kinase activity-IEA;lysine biosynthetic process via diaminopimelate-I	aspartate kinase [EC:2.7.2.4]	Aspartate/glutamate/uridylate kinase
TRINITY_DN2026_c0_g2	FvH4_1g15130.1	2.71325	8.65775	5.9445	3.19091	4.56521e-06	0.0143511	probable disease resistance protein At5g66900 \\ 0.00E+00 \\ 79.13 % \\ GO:0043531-IEA \\ ADP binding-IEA \\ GO:0043531 \\ ADP binding		NB-ARC	TRINITY_DN2305_c0_g1	FvH4_6g09640.1	3.178	9.09325	5.91525	2.86131	7.05666e-06	0.0191298	serine/threonine-protein kinase AtPK2/AtPK19-like \\ 0.00E+00 \\ 83.84 % \\ GO:0000166-IEA;GO:0005737-IBA;GO:0016020-IEA;GO:0016021-IEA;GO:0016310-IEA;GO:0016740-IEA;GO:0016301-IEA;GO:0035556-IBA;GO:0004672-IEA;GO:0004674-IEA;GO:0004674-IBA;GO:0005524-IEA	ribosomal protein S6 kinase beta [EC:2.7.11.1]	Protein kinase domain
TRINITY_DN1769_c0_g1	FvH4_2g05690.1	2.31325	7.3695	5.05625	3.18578	0.000728716	0.158095	UDP-glucose flavonoid 3-O-glucosyltransferase 7-like \\ 0.00E+00 \\ 87.40 % \\ GO:0016757-IEA;GO:0016758-IEA;GO:0102360-IEA;GO:0102425-IEA;GO:0047893-IEA;GO:0016740-IEA \\ transferase activity, transferring glycosyl groups-IEA;transferase activity, transf	abscisate beta-glucosyltransferase [EC:2.4.1.263]	UDP-glucuronosyl/UDP-glucosyltransferase	TRINITY_DN299500_c0_g1	FvH4_1g06030.1	0.739	2.114	1.375	2.86062	0.00194615	0.289918	43kDa postsynaptic protein \\ 8.00E-43 \\ 64.87 % \\ GO:0003677-IEA;GO:0007165-IEA;GO:0043531-IEA;GO:0015074-IEA;GO:0000943-IEA;GO:0016787-IEA;GO:0003676-IEA \\ DNA binding-IEA;signal transduction-IEA;ADP binding-IEA;DNA integration-IEA;retrotransposon nu		Zinc finger, RING-type
TRINITY_DN2241_c1_g3	FvH4_5g30330.1	2.5155	8.00675	5.49125	3.18297	6.14197e-05	0.0412234	GTP 3',8-cyclase, mitochondrial \\ 2.70E-11 \\ 89.74 %		MoaA/nifB/pqqE, iron-sulphur binding, conserved site	TRINITY_DN2047_c4_g1	FvH4_6g15590.1	2.41575	6.883	4.46725	2.84922	5.34159e-06	0.0174224	MLO-like protein 3 \\ 4.10E-13 \\ 79.32 % \\ GO:0009507-IEA;GO:0050790-IEA;GO:0005829-IEA;GO:0009099-IEA;GO:0006551-IEA;GO:0043621-IEA;GO:0006573-IEA;GO:0016740-IEA;GO:0009082-IEA;GO:0005777-IEA;GO:0003984-IEA \\ chloroplast-IEA;regulation of catalytic ac	mlo protein	Mlo-related protein
TRINITY_DN6038_c0_g2	FvH4_5g36970.1	6.04925	19.2003	13.151	3.17399	0.00535918	0.463635	7-deoxyloganetin glucosyltransferase-like \\ 0.00E+00 \\ 89.81 % \\ GO:0016757-IEA;GO:0016758-IEA;GO:0016740-IEA \\ transferase activity, transferring glycosyl groups-IEA;transferase activity, transferring hexosyl groups-IEA;transferase activity-IEA \\ GO	7-deoxyloganetin glucosyltransferase [EC:2.4.1.324]	UDP-glucuronosyl/UDP-glucosyltransferase	TRINITY_DN7738_c0_g1	FvH4_5g23820.1	3.88225	11.0607	7.1785	2.84906	0.00059893	0.157103	transmembrane protein 45A \\ 1.20E-67 \\ 88.96 % \\ GO:0016020-IEA;GO:0016021-IEA \\ membrane-IEA;integral component of membrane-IEA \\ GO:0016021 \\ integral component of membrane		Protein of unknown function DUF716 (TMEM45)
TRINITY_DN11594_c0_g1	FvH4_1g14170.1	6.3185	20.0532	13.7347	3.17374	0.000545055	0.137861	probable calcium-binding protein CML41 \\ 3.70E-108 \\ 87.04 % \\ GO:0016020-IEA;GO:0016021-IEA;GO:0016874-IEA \\ membrane-IEA;integral component of membrane-IEA;ligase activity-IEA \\ GO:0016021;GO:0016874 \\ integral component of membrane;ligase activit		EF-hand domain	TRINITY_DN2026_c0_g2	FvH4_1g15130.1	3.04025	8.65775	5.6175	2.84771	3.4832e-06	0.0149419	probable disease resistance protein At5g66900 \\ 0.00E+00 \\ 79.13 % \\ GO:0043531-IEA \\ ADP binding-IEA \\ GO:0043531 \\ ADP binding		NB-ARC
TRINITY_DN906_c3_g1	FvH4_6g11360.1	18.315	58.064	39.749	3.1703	0.0195683	0.948161	protein SRG1-like		Oxoglutarate/iron-dependent dioxygenase	TRINITY_DN6602_c0_g1	FvH4_7g34200.1	6.88125	19.5802	12.699	2.84545	0.0161846	0.88645	alcohol dehydrogenase-like 1 \\ 0.00E+00 \\ 73.87 % \\ GO:0005634-IEA \\ nucleus-IEA	S-(hydroxymethyl)glutathione dehydrogenase / alcohol dehydrogenase [EC:1.1.1.284 1.1.1.1]	Alcohol dehydrogenase, zinc-type, conserved site
TRINITY_DN906_c0_g1	FvH4_4g03260.1	60.9592	192.618	131.658	3.15977	0.00354331	0.371162	1-aminocyclopropane-1-carboxylate oxidase homolog 1-like \\ 0.00E+00 \\ 87.92 % \\ GO:0046872-IEA;GO:0016491-IEA;GO:0050590-IEA;GO:0055114-IEA \\ metal ion binding-IEA;oxidoreductase activity-IEA;desacetoxyvindoline 4-hydroxylase activity-IEA;oxidation-re		Oxoglutarate/iron-dependent dioxygenase	TRINITY_DN743_c2_g1	FvH4_7g26160.1	1.01225	2.87625	1.864	2.84144	0.00014507	0.0762655	putative zinc-ribbon domain, plant protein \\ 0.00E+00 \\ 62.40 %		Probable zinc-ribbon domain, plant
TRINITY_DN743_c2_g1	FvH4_7g26160.1	0.91225	2.87625	1.964	3.15292	0.000239279	0.0875235	putative zinc-ribbon domain, plant protein \\ 0.00E+00 \\ 62.40 %		Probable zinc-ribbon domain, plant	TRINITY_DN3462_c1_g1	FvH4_4g13230.1	5.51425	15.638	10.1237	2.83593	8.66615e-06	0.0207542	heat stress transcription factor A-5 \\ 0.00E+00 \\ 84.95 % \\ GO:0003677-IEA;GO:0003700-IEA;GO:0006355-IEA;GO:0043565-IEA;GO:0005634-IEA \\ DNA binding-IEA;DNA-binding transcription factor activity-IEA;regulation of transcription, DNA-templated-IEA;seque	heat shock transcription factor, other eukaryote	Heat shock factor (HSF)-type, DNA-binding
TRINITY_DN493_c0_g1	FvH4_6g40820.1	0.4945	1.5565	1.062	3.14762	0.000940239	0.181377	putative leucine-rich repeat-containing, plant-type, leucine-rich repeat domain, L \\ 0.00E+00 \\ 81.09 % \\ GO:0016020-IEA;GO:0016021-IEA \\ membrane-IEA;integral component of membrane-IEA \\ GO:0016021 \\ integral component of membrane		Leucine-rich repeat	TRINITY_DN11499_c0_g1	FvH4_4g15270.1	1.083	3.06275	1.97975	2.82802	0.0293741	1	putative pyridoxal phosphatase \\ 1.20E-16 \\ 92.33 % \\ GO:0005747-IEA;GO:0005747-IBA;GO:0005739-IEA;GO:0016491-IEA;GO:0006120-IEA;GO:0006120-IBA;GO:0016020-IEA;GO:0070469-IEA;GO:0055114-IEA;GO:0008137-IEA;GO:0005743-IEA \\ mitochondrial respiratory chai		HAD hydrolase, subfamily IA
TRINITY_DN170198_c0_g1	FvH4_1g20110.1	0.84125	2.6435	1.80225	3.14235	4.16532e-05	0.0329617	E3 ubiquitin-protein ligase ATL31-like \\ 0.00E+00 \\ 68.00 % \\ GO:0016020-IEA;GO:0016021-IEA;GO:0016874-IEA \\ membrane-IEA;integral component of membrane-IEA;ligase activity-IEA \\ GO:0016021 \\ integral component of membrane	E3 ubiquitin-protein ligase ATL6/9/15/31/42/55 [EC:2.3.2.27]	Zinc finger, RING-type	TRINITY_DN4704_c0_g1	FvH4_3g14400.1	0.95	2.68075	1.73075	2.82184	0.0432865	1	---NA---
TRINITY_DN2363_c0_g1	FvH4_7g27800.1	3.93925	12.3185	8.37925	3.12712	0.00346604	0.367383	21 kDa protein-like		Pectinesterase inhibitor domain	TRINITY_DN3308_c0_g1	FvH4_3g20120.1	7.643	21.5618	13.9188	2.82111	0.00749143	0.587696	E3 ubiquitin-protein ligase RMA3 \\ 9.80E-153 \\ 80.23 % \\ GO:0046872-IEA;GO:0016020-IEA;GO:0016021-IEA;GO:0016310-IEA;GO:0005783-IEA;GO:0016301-IEA;GO:0016874-IEA;GO:0004842-IEA;GO:0016567-IEA \\ metal ion binding-IEA;membrane-IEA;integral component of	E3 ubiquitin-protein ligase RNF5 [EC:2.3.2.27]	Zinc finger, RING-type
TRINITY_DN1410_c2_g1	FvH4_6g34000.1	9.1145	28.4855	19.371	3.12529	0.000543046	0.137466	probable phospholipid-transporting ATPase 4 isoform X2 \\ 0.00E+00 \\ 91.02 % \\ GO:0000166-IEA;GO:0000287-IEA;GO:0045332-IEA;GO:0016020-IEA;GO:0016021-IEA;GO:0015914-IEA;GO:0004012-IEA;GO:0016787-IEA;GO:0005524-IEA \\ nucleotide binding-IEA;magnesium ion	phospholipid-translocating ATPase [EC:3.6.3.1]	P-type ATPase	TRINITY_DN198453_c0_g1	FvH4_4g21750.1	1.86625	5.2645	3.39825	2.8209	0.00924369	0.656005	hypothetical protein RchiOBHm_Chr4g0427981
TRINITY_DN1537_c0_g7	FvH4_2g32120.1	6.558	20.4793	13.9213	3.12279	2.61676e-05	0.0254304	ferrochelatase-2, chloroplastic \\ 0.00E+00 \\ 86.13 % \\ GO:0006979-IEA;GO:0006779-IEA;GO:0009507-IEA;GO:0005739-IEA;GO:0016020-IEA;GO:0016829-IEA;GO:0016021-IEA;GO:0006783-IEA;GO:0033014-IEA;GO:0004325-IEA;GO:0009536-IEA \\ response to oxidative stress-	protoporphyrin/coproporphyrin ferrochelatase [EC:4.99.1.1 4.99.1.9]	Ferrochelatase	TRINITY_DN11100_c0_g1	FvH4_4g32790.1	1.355	3.821	2.466	2.81993	0.00275475	0.350106	U-box domain-containing protein 35 \\ 1.10E-81 \\ 68.09 % \\ GO:0016787-IEA \\ hydrolase activity-IEA		UspA
TRINITY_DN5685_c0_g2	FvH4_1g10810.1	4.9195	15.3528	10.4333	3.12079	0.00463762	0.430334	putative F-box protein At1g65770 \\ 0.00E+00 \\ 70.41 %		Domain unknown function DUF295	TRINITY_DN7997_c0_g2	FvH4_4g07010.1	1.704	4.794	3.09	2.81338	0.000971618	0.201025	PREDICTED: uncharacterized protein LOC101298504
TRINITY_DN3167_c0_g1	FvH4_4g32900.1	1.53175	4.76875	3.237	3.11327	0.00027804	0.0950676	Transmembrane protein \\ 6.80E-119 \\ 83.63 % \\ GO:0016020-IEA;GO:0016021-IEA \\ membrane-IEA;integral component of membrane-IEA \\ GO:0016021 \\ integral component of membrane			TRINITY_DN6154_c0_g1	FvH4_1g12460.1	6.7355	18.9423	12.2068	2.8123	0.000647517	0.161523	bifunctional epoxide hydrolase 2-like \\ 0.00E+00 \\ 94.96 % \\ GO:0055085-IEA;GO:0003824-IEA;GO:0016020-IEA;GO:0016021-IEA;GO:0022857-IEA;GO:0004301-IEA;GO:0016787-IEA \\ transmembrane transport-IEA;catalytic activity-IEA;membrane-IEA;integral component		Alpha/beta hydrolase fold-1
TRINITY_DN25152_c0_g2	FvH4_2g09040.1	0.966	3.005	2.039	3.11077	0.0134393	0.773589	universal stress protein PHOS32 \\ 1.00E-18 \\ 60.91 %		UspA	TRINITY_DN262375_c0_g1	FvH4_7g13970.1	1.2875	3.61925	2.33175	2.81107	0.000101797	0.0634831	putative ripening-related protein 1 \\ 2.90E-15 \\ 73.20 %		RlpA-like domain superfamily
TRINITY_DN6928_c0_g1	FvH4_7g34110.1	14.9238	46.3422	31.4185	3.10527	0.00061523	0.146245	s-norcoclaurine synthase 2 \\ 3.90E-06 \\ 71.70 %		Bet v I/Major latex protein	TRINITY_DN6874_c0_g1	FvH4_6g53300.1	1.80475	5.072	3.26725	2.81036	0.000288568	0.109617	putative non-specific serine/threonine protein kinase \\ 0.00E+00 \\ 70.79 % \\ GO:0071949-IEA;GO:0016491-IEA;GO:0003824-IEA;GO:0050660-IEA;GO:0016020-IEA;GO:0016021-IEA;GO:0055114-IEA \\ FAD binding-IEA;oxidoreductase activity-IEA;catalytic activity-IEA;		Leucine-rich repeat-containing N-terminal, plant-type
TRINITY_DN8128_c0_g1	FvH4_7g24490.1	1.09	3.3755	2.2855	3.09679	0.00309563	0.343525	putative serine/threonine-protein kinase-like protein CCR3 \\ 0.00E+00 \\ 81.20 % \\ GO:0016020-IEA;GO:0016021-IEA;GO:0016310-IEA;GO:0004672-IEA;GO:0016740-IEA;GO:0016301-IEA;GO:0005524-IEA;GO:0006468-IEA \\ membrane-IEA;integral component of membrane-IEA		Protein kinase domain	TRINITY_DN29604_c0_g1	FvH4_3g01800.1	4.2185	11.8522	7.63375	2.80959	0.00245517	0.329026	peroxisomal membrane protein PMP22 \\ 0.00E+00 \\ 89.56 % \\ GO:0030170-IEA;GO:0019264-IEA;GO:0003824-IEA;GO:0004372-IEA;GO:0016020-IEA;GO:0016021-IEA;GO:0035999-IEA;GO:0006730-IEA;GO:0016740-IEA;GO:0008168-IEA;GO:0032259-IEA \\ pyridoxal phosphate bindin		Mpv17/PMP22
TRINITY_DN2180_c0_g1	FvH4_3g19390.1	0.63525	1.967	1.33175	3.09642	0.00010806	0.0558031	L-type lectin-domain containing receptor kinase IX.1-like \\ 0.00E+00 \\ 80.03 % \\ GO:0004601-IEA;GO:0016020-IEA;GO:0016021-IEA;GO:0055114-IEA;GO:0004672-IEA;GO:0016740-IEA;GO:0098869-IEA;GO:0030246-IEA;GO:0005524-IEA;GO:0006468-IEA \\ peroxidase activit		Protein kinase domain	TRINITY_DN15133_c0_g1	FvH4_4g27540.1	9.1605	25.732	16.5715	2.80902	0.0195867	0.98205	PREDICTED: uncharacterized protein LOC105351473 \\ 1.50E-07 \\ 93.75 %
TRINITY_DN8387_c1_g1	FvH4_4g26070.1	1.21925	3.77275	2.5535	3.09432	9.9453e-06	0.019515	cysteine-rich receptor-like protein kinase 3 \\ 0.00E+00 \\ 87.22 % \\ GO:0016020-IEA;GO:0016021-IEA;GO:0016310-IEA;GO:0004672-IEA;GO:0016740-IEA;GO:0016301-IEA;GO:0004674-IEA;GO:0005524-IEA;GO:0006468-IEA;GO:0005886-IEA \\ membrane-IEA;integral component		Protein kinase domain	TRINITY_DN14398_c0_g1	FvH4_2g39750.1	1.55175	4.357	2.80525	2.8078	0.0465665	1	protein RADIALIS-like 3		SANT/Myb domain
TRINITY_DN5569_c0_g1	FvH4_2g03450.1	0.85	2.62825	1.77825	3.09206	0.00743528	0.555294	PREDICTED: uncharacterized protein LOC101305138 \\ 0.00E+00 \\ 88.57 % \\ GO:0003964-IEA;GO:0016779-IEA;GO:0008270-IEA;GO:0006278-IEA;GO:0015074-IEA;GO:0000943-IEA;GO:0016740-IEA;GO:0003676-IEA \\ RNA-directed DNA polymerase activity-IEA;nucleotidyltransf			TRINITY_DN4106_c0_g1	FvH4_6g32710.1	33.3828	93.719	60.3363	2.80741	0.000124151	0.0704366	hypothetical protein RchiOBHm_Chr2g0141731 \\ 2.30E-93 \\ 65.04 %
TRINITY_DN1990_c1_g4	FvH4_5g03140.1	5.8365	18.041	12.2045	3.09106	2.21453e-06	0.00947541	heavy metal-associated isoprenylated plant protein 39		Heavy metal-associated domain, HMA	TRINITY_DN5932_c0_g1	FvH4_5g06430.1	7.49825	21.0415	13.5432	2.80619	0.00123654	0.230455	quinolinate synthase, chloroplastic \\ 0.00E+00 \\ 87.82 % \\ GO:0043085-IEA;GO:0042803-IEA;GO:0019805-IEA;GO:0009507-IEA;GO:0051176-IEA;GO:0009435-IEA;GO:0051539-IEA;GO:0008047-IEA;GO:0016740-IEA;GO:0009060-IEA;GO:0008987-IEA \\ positive regulation of ca	quinolinate synthase [EC:2.5.1.72]	Quinolinate synthetase A
TRINITY_DN3288_c0_g2	FvH4_3g17940.1	1.057	3.261	2.204	3.08515	0.000206143	0.0801851	probable LRR receptor-like serine/threonine-protein kinase At1g53430 isoform X1 \\ 0.00E+00 \\ 86.87 % \\ GO:0016020-IEA;GO:0016021-IEA;GO:0016310-IEA;GO:0004672-IEA;GO:0016740-IEA;GO:0016301-IEA;GO:0005524-IEA;GO:0006468-IEA \\ membrane-IEA;integral comp		Armadillo	TRINITY_DN740_c0_g1	FvH4_5g16950.1	5.05275	14.116	9.06325	2.79373	0.00340779	0.389985	probable glutathione S-transferase \\ 8.00E-160 \\ 86.86 %
TRINITY_DN3474_c0_g1	FvH4_1g11990.1	2.5205	7.7625	5.242	3.07975	0.00107014	0.194157	zinc finger CCCH domain-containing protein 6 \\ 0.00E+00 \\ 61.16 % \\ GO:0046872-IEA \\ metal ion binding-IEA \\ GO:0046872 \\ metal ion binding		Zinc finger, CCCH-type	TRINITY_DN2875_c0_g1	FvH4_1g15580.1	1.03325	2.88575	1.8525	2.79289	0.00162134	0.265086	patatin-like protein 2 \\ 0.00E+00 \\ 91.23 % \\ GO:0003755-IEA;GO:0006629-IEA;GO:0016042-IEA;GO:0000413-IEA;GO:0016787-IEA;GO:0016853-IEA;GO:0006457-IEA \\ peptidyl-prolyl cis-trans isomerase activity-IEA;lipid metabolic process-IEA;lipid catabolic proce		Patatin-like phospholipase domain
TRINITY_DN7290_c0_g1	FvH4_2g31410.1	3.0955	9.52075	6.42525	3.07567	0.000161585	0.069138	protein PLASTID MOVEMENT IMPAIRED 1-RELATED 1 \\ 0.00E+00 \\ 72.95 %		EEIG1/EHBP1 N-terminal domain	TRINITY_DN2965_c1_g1	FvH4_1g24940.1	1.46775	4.09575	2.628	2.7905	0.000732981	0.172769	lipase-like PAD4 \\ 0.00E+00 \\ 80.75 % \\ GO:0001666-IEA;GO:0010618-IEA;GO:0051707-IEA;GO:0010310-IEA;GO:0016787-IEA;GO:0080151-IEA;GO:2000031-IEA;GO:0050829-IEA;GO:0010150-IEA;GO:1900367-IEA;GO:0009862-IEA;GO:1900426-IEA;GO:0009627-IEA;GO:0009625-IEA;GO		Fungal lipase-like domain
TRINITY_DN5975_c0_g1	FvH4_2g17960.1	8.50025	26.1302	17.63	3.07406	0.000203769	0.0797652	asparagine--tRNA ligase, cytoplasmic 2 \\ 0.00E+00 \\ 82.98 % \\ GO:0006418-IEA;GO:0000166-IEA;GO:0005737-IEA;GO:0004812-IEA;GO:0009507-IEA;GO:0005739-IEA;GO:0004816-IEA;GO:0006421-IEA;GO:0016874-IEA;GO:0005524-IEA \\ tRNA aminoacylation for protein trans	asparaginyl-tRNA synthetase [EC:6.1.1.22]	Aspartyl/Asparaginyl-tRNA synthetase, class IIb	TRINITY_DN5898_c0_g1	FvH4_5g11890.1	0.764	2.1295	1.3655	2.7873	5.81209e-05	0.0500176	cysteine-rich receptor-like protein kinase 10 \\ 1.60E-143 \\ 88.27 % \\ GO:0004672-IEA;GO:0016740-IEA;GO:0004674-IBA;GO:0005524-IEA;GO:0006468-IEA;GO:0006468-IBA;GO:0005886-IBA \\ protein kinase activity-IEA;transferase activity-IEA;protein serine/threon		Protein kinase domain
TRINITY_DN2965_c1_g1	FvH4_1g24940.1	1.3325	4.09575	2.76325	3.07373	0.00063647	0.148319	lipase-like PAD4 \\ 0.00E+00 \\ 80.75 % \\ GO:0001666-IEA;GO:0010618-IEA;GO:0051707-IEA;GO:0010310-IEA;GO:0016787-IEA;GO:0080151-IEA;GO:2000031-IEA;GO:0050829-IEA;GO:0010150-IEA;GO:1900367-IEA;GO:0009862-IEA;GO:1900426-IEA;GO:0009627-IEA;GO:0009625-IEA;GO		Fungal lipase-like domain	TRINITY_DN4334_c0_g2	FvH4_5g04760.1	1.302	3.62475	2.32275	2.78399	0.000109557	0.0669667	GDSL esterase/lipase At4g10955-like \\ 0.00E+00 \\ 79.06 % \\ GO:0006629-IEA;GO:0016787-IEA \\ lipid metabolic process-IEA;hydrolase activity-IEA \\ GO:0006629;GO:0016787 \\ lipid metabolic process;hydrolase activity		Fungal lipase-like domain
TRINITY_DN6969_c0_g2	FvH4_6g25060.1	12.233	37.5735	25.3405	3.07149	0.0320897	1	probable calcium-binding protein CML36 \\ 1.40E-122 \\ 79.63 % \\ GO:0005509-IEA \\ calcium ion binding-IEA \\ GO:0005509 \\ calcium ion binding		EF-hand domain	TRINITY_DN3711_c0_g1	FvH4_5g30360.1	12.1757	33.652	21.4763	2.76385	0.000120109	0.0696836	High-affinity nickel-transport family protein \\ 5.30E-172 \\ 95.42 % \\ GO:0016020-IEA;GO:0016021-IEA \\ membrane-IEA;integral component of membrane-IEA \\ GO:0016021 \\ integral component of membrane
TRINITY_DN4172_c0_g2	FvH4_7g04980.1	0.53175	1.631	1.09925	3.06723	0.000963814	0.183625	PREDICTED: uncharacterized protein LOC101290890 \\ 3.90E-69 \\ 89.69 % \\ GO:0006506-IEA;GO:0016757-IEA;GO:0016020-IEA;GO:0016021-IEA;GO:0017176-IEA;GO:0016740-IEA \\ GPI anchor biosynthetic process-IEA;transferase activity, transferring glycosyl groups-I			TRINITY_DN3155_c0_g3	FvH4_7g15570.1	7.475	20.5882	13.1132	2.75428	0.000770128	0.177585	delta(8)-fatty-acid desaturase 1-like \\ 0.00E+00 \\ 88.28 % \\ GO:0016491-IEA;GO:0016020-IEA;GO:0006629-IEA;GO:0016021-IEA;GO:0102003-IEA;GO:0055114-IEA \\ oxidoreductase activity-IEA;membrane-IEA;lipid metabolic process-IEA;integral component of membran	sphingolipid 8-(E/Z)-desaturase [EC:1.14.19.29]	Cytochrome b5-like heme/steroid binding domain
TRINITY_DN2218_c1_g3	FvH4_2g10460.1	2.381	7.289	4.908	3.06132	0.0220043	1	peroxidase 19 \\ 0.00E+00 \\ 92.05 % \\ GO:0006979-IEA;GO:0004601-IEA;GO:0004601-IBA;GO:0046872-IEA;GO:0016491-IEA;GO:0016020-IEA;GO:0016021-IEA;GO:0055114-IEA;GO:0098869-IEA;GO:0020037-IEA;GO:0009506-IBA;GO:0005576-IEA;GO:0009505-IBA;GO:0042744-IEA \\ re	peroxidase [EC:1.11.1.7]	Plant peroxidase	TRINITY_DN7598_c0_g1	FvH4_3g09930.1	1.8965	5.1845	3.288	2.73372	0.0113589	0.735307	cationic amino acid transporter 1-like \\ 0.00E+00 \\ 88.01 % \\ GO:0055085-IEA;GO:0016020-IEA;GO:0016021-IEA;GO:0022857-IEA \\ transmembrane transport-IEA;membrane-IEA;integral component of membrane-IEA;transmembrane transporter activity-IEA \\ GO:001602		Amino acid/polyamine transporter I
TRINITY_DN796_c0_g2	FvH4_2g14260.1	2.62625	8.03725	5.411	3.06035	0.0129311	0.756983	U-box domain-containing protein 28-like \\ 0.00E+00 \\ 79.90 % \\ GO:0016746-IEA;GO:0016740-IEA;GO:0016874-IEA;GO:0016567-IEA;GO:0004842-IEA \\ transferase activity, transferring acyl groups-IEA;transferase activity-IEA;ligase activity-IEA;protein ubiquit		U box domain	TRINITY_DN13760_c0_g1	FvH4_4g30280.1	0.6535	1.77875	1.12525	2.72188	0.0147568	0.845683	UPF0481 protein At3g47200-like \\ 0.00E+00 \\ 71.52 % \\ GO:0016020-IEA;GO:0016021-IEA \\ membrane-IEA;integral component of membrane-IEA \\ GO:0016021 \\ integral component of membrane		Protein of unknown function DUF247, plant
TRINITY_DN8465_c0_g1	FvH4_6g16630.1	0.637	1.9485	1.3115	3.05887	2.43286e-05	0.0246004	protein NUCLEAR FUSION DEFECTIVE 4-like \\ 0.00E+00 \\ 86.72 % \\ GO:0055085-IEA;GO:0016020-IEA;GO:0016021-IEA \\ transmembrane transport-IEA;membrane-IEA;integral component of membrane-IEA \\ GO:0016021;GO:0055085 \\ integral component of membrane;transm		Nodulin-like	TRINITY_DN6573_c0_g1	FvH4_4g24540.1	21.1595	57.4075	36.248	2.71308	0.0048883	0.468782	b12d protein \\ 9.60E-22 \\ 90.54 % \\ GO:0016020-IEA;GO:0016021-IEA \\ membrane-IEA;integral component of membrane-IEA \\ GO:0016021 \\ integral component of membrane
TRINITY_DN1037_c0_g3	FvH4_7g27120.1	0.8725	2.66575	1.79325	3.0553	0.0104178	0.670021	hexose carrier protein HEX6-like \\ 0.00E+00 \\ 93.68 % \\ GO:0055085-IEA;GO:0016491-IEA;GO:0032440-IEA;GO:0016020-IEA;GO:0016021-IEA;GO:0008643-IEA;GO:0055114-IEA;GO:0015293-IEA;GO:0022857-IEA;GO:0005215-IEA \\ transmembrane transport-IEA;oxidoreductase		Sugar/inositol transporter	TRINITY_DN12920_c0_g1	FvH4_2g32830.1	17.245	46.7562	29.5112	2.71129	0.0168585	0.902761	Arrestin domain-containing protein \\ 3.30E-67 \\ 59.72 % \\ GO:0003677-IEA;GO:0006355-IEA;GO:0005634-IEA \\ DNA binding-IEA;regulation of transcription, DNA-templated-IEA;nucleus-IEA		Uncharacterised conserved protein UCP031279
TRINITY_DN3462_c1_g1	FvH4_4g13230.1	5.13925	15.638	10.4988	3.04286	6.42567e-06	0.016275	heat stress transcription factor A-5 \\ 0.00E+00 \\ 84.95 % \\ GO:0003677-IEA;GO:0003700-IEA;GO:0006355-IEA;GO:0043565-IEA;GO:0005634-IEA \\ DNA binding-IEA;DNA-binding transcription factor activity-IEA;regulation of transcription, DNA-templated-IEA;seque	heat shock transcription factor, other eukaryote	Heat shock factor (HSF)-type, DNA-binding	TRINITY_DN9577_c0_g1	FvH4_2g40150.1	24.825	67.2922	42.4672	2.71066	0.0195622	0.981518	anthocyanidin 3-O-glucosyltransferase 5-like	hydroquinone glucosyltransferase [EC:2.4.1.218]	UDP-glucuronosyl/UDP-glucosyltransferase
[truncated: 1,040 more rows]

## Sheet: NCGR1603
				NCGR1603_untreated_control_C0h Vs NCGR1603_wounded-inoculated_WI-48h												NCGR1603_wounded_W48h Vs NCGR1603_wounded-inoculated_WI-48h
[truncated: 985 more rows]

## Sheet: Bukammen
				Bukammen_untreated_control_C0h Vs Bukammen_wounded-inoculated_WI-48h												Bukammen_wounded_W48h Vs Bukammen_wounded-inoculated_WI-48h
[truncated: 868 more rows]

[truncated: 8 more sheets: RPc-1 locus, PR proteins, Auxin, Salicylic acid, Jasmonic acid, Ethylene, Flavonoid, Isopreniod biosynthesis]
