# Supplementary material for: Comparative Transcriptome Analysis Reveals Novel Candidate Resistance Genes Involved in Defence against Phytophthora cactorum in Strawberry
Source: Int J Mol Sci. 2023 Jun 29;24(13):10851. doi: 10.3390/ijms241310851 (PMC10341869; doi:10.3390/ijms241310851)
Supplement: Supplementary file 1 [file ijms-24-10851-s001.zip › Supplementary_material_S4.xlsx]

## Sheet: Description
Sheet name	Description
Controls vs. inoculated	Transcription factor genes differentially expressed (DE) (fold change ≥ 2 or ≤ -2 , P < 0.05) between controls (untreated or wounded) and inoculated samples (48 hours after inoculation with Phytophthora cactorum) of the F. vesca genotypes
Resistant vs. Susceptible	Transcription factor genes differentially expressed (DE) (fold change ≥ 2 or ≤ -2 , P < 0.05) between the susceptible genotype NCGR1218 and the two resistant genotypes NCGR1603 and Bukammen 48 hours after inoculation with Phytophthora cactorum

## Sheet: Controls vs. inoculated
				NCGR1218_untreated_control_C0h vs. NCGR1218_wounded-inoculated_WI_48h											NCGR1218_wounded_48h Vs NCGR1218_wounded-inoculated_48h											NCGR1603_untreated_control_C0h vs. NCGR1603_wounded-inoculated_WI_48h												NCGR1603_wounded_48h Vs NCGR1603_wounded-inoculated_48h										Bukammen_untreated_control_C0h vs. Bukammen_wounded-inoculated_WI_48h
Trinity_ID	Fragaria_vesca4.0_ID	1218_C-0h Mean (TPM)	1218_WI-48h Mean (TPM)	Difference (TPM)	Fold change	P-value	FDR corrected p-value	NCBI_Nr_Annotations (<1E-3) with GO terms	Fragaria_vesca4.0_KEGG_orthologs_annotations	Fragaria_vesca4.0_InterPro_domain_annotations	Trinity_ID	Fragaria_vesca4.0_ID	1218_W-48h Mean (TPM)	1218_WI-48h Mean (TPM)	Difference	Fold change	P-value	FDR corrected p-value	NCBI_Nr_Annotations (<1E-3) with GO terms	Fragaria_vesca4.0_KEGG_orthologs_annotations	Fragaria_vesca4.0_InterPro_domain_annotations	Trinity_ID	Fragaria_vesca4.0_ID	1603_C-0h Mean (TPM)	1603_WI-48h Mean (TPM)	Difference (TPM)	Fold change	P-value	FDR corrected p-value	NCBI_Nr_Annotations (<1E-3) with GO terms	Fragaria_vesca4.0_KEGG_orthologs_annotations	Fragaria_vesca4.0_InterPro_domain_annotations	Trinity_ID	Fragaria_vesca4.0_ID	1603_W-48h Mean (TPM)	1603_WI-48h Mean (TPM)	Difference (TPM)	Fold change	P value	FDR corrected p-value	NCBI_Nr_Annotations (<1E-3) with GO terms	Fragaria_vesca4.0_KEGG_orthologs_annotations	Fragaria_vesca4.0_InterPro_domain_annotations	Trinity_ID	Fragaria_vesca4.0_ID	BK_C-0h Mean (TPM)	BK_WI-48h Mean (TPM)	Difference	Fold change
Upregulated genes											Upregulated genes											Upregulated genes											Upregulated genes											Upregulated genes
TRINITY_DN838_c0_g4	FvH4_4g03460.1	0	1.363	1.363	#DIV/0!	0.00970207	0.645833	ethylene-responsive transcription factor ERF098		AP2/ERF domain	TRINITY_DN1308_c0_g2	FvH4_4g28030.1	5.4435	15.7032	10.2597	2.88477	0.0107911	0.714541	AP2/ERF and B3 domain-containing transcription factor RAV1 \\ 1.00E-102 \\ 87.43 % \\ GO:0016874-IEA;GO:0009536-IEA \\ ligase activity-IEA;plastid-IEA \\ GO:0009536;GO:0016874 \\ plastid;ligase activity	RAV-like factor	AP2/ERF domain	TRINITY_DN180429_c0_g1	FvH4_1g25360.1	0.1115	4.44925	4.33775	39.9036	0.00177265	0.358569	protein DOG1-like 4 \\ 0.00E+00 \\ 78.97 % \\ GO:0035235-IEA;GO:0016020-IEA;GO:0016021-IEA;GO:0004970-IEA;GO:0006811-IEA \\ ionotropic glutamate receptor signaling pathway-IEA;membrane-IEA;integral component of membrane-IEA;ionotropic glutamate receptor a		Transcription factor TGA like domain	TRINITY_DN12399_c0_g1	FvH4_4g24820.1	0.34675	1.18325	0.8365	3.4124	0.000131943	0.6452	DELLA protein RGL1-like \\ 0.00E+00 \\ 83.61 % \\ GO:0003700-IBA;GO:0052689-IEA;GO:0006355-IEA;GO:0043565-IBA;GO:0016787-IEA;GO:0005634-IBA \\ DNA-binding transcription factor activity-IBA;carboxylic ester hydrolase activity-IEA;regulation of transcriptio		Transcription factor GRAS	TRINITY_DN180429_c0_g1	FvH4_1g25360.1	0.041	2.5935	2.5525	63.2561
TRINITY_DN6321_c0_g2	FvH4_2g21560.1	0	2.7615	2.7615	#DIV/0!	0.000132118	0.0613899	ethylene-responsive transcription factor ERF098-like \\ 0.00E+00 \\ 99.70 % \\ GO:0006616-IEA;GO:0000166-IEA;GO:0006515-IEA;GO:0005829-IEA;GO:0051082-IEA;GO:0005524-IEA;GO:0016887-IEA;GO:0006457-IEA \\ SRP-dependent cotranslational protein targeting to me		AP2/ERF domain	TRINITY_DN3067_c0_g1	FvH4_5g10410.1	0.39825	1.23075	0.8325	3.0904	0.00619036	0.533308	B3 domain-containing transcription factor NGA1-like \\ 0.00E+00 \\ 66.27 % \\ GO:0003677-IEA;GO:0006351-IEA;GO:0006355-IEA;GO:0005634-IEA \\ DNA binding-IEA;transcription, DNA-templated-IEA;regulation of transcription, DNA-templated-IEA;nucleus-IEA \\ GO:		B3 DNA binding domain	TRINITY_DN15162_c0_g1	FvH4_6g52350.1	0.27	1.831	1.561	6.78148	0.00250446	0.420208	putative transcription factor C2H2 family			TRINITY_DN24531_c0_g2	FvH4_4g03470.1	4.117	10.4322	6.31525	2.53394	0.0230882	1	ethylene-responsive transcription factor 1B	ethylene-responsive transcription factor 1	AP2/ERF domain	TRINITY_DN15162_c0_g1	FvH4_6g52350.1	0.16625	2.23925	2.073	13.4692
TRINITY_DN6423_c0_g1	FvH4_2g41070.1	0.235	10.9378	10.7028	46.5436	0.000367039	0.110137	probable WRKY transcription factor 40 \\ 3.40E-102 \\ 74.68 %		WRKY domain	TRINITY_DN6692_c0_g1	FvH4_5g39200.1	30.6277	81.1775	50.5497	2.65046	0.000144636	0.0761673	bZIP transcription factor 53-like \\ 0.00E+00 \\ 72.37 % \\ GO:0051213-IEA;GO:0046872-IEA;GO:0016491-IEA;GO:0016707-IEA;GO:0055114-IEA \\ dioxygenase activity-IEA;metal ion binding-IEA;oxidoreductase activity-IEA;gibberellin 3-beta-dioxygenase activity-IE		Basic-leucine zipper domain	TRINITY_DN6203_c0_g2	FvH4_2g13240.1	0.65775	4.3965	3.73875	6.68415	0.000770195	0.259829	ethylene-responsive transcription factor ABR1-like \\ 4.20E-72 \\ 76.48 % \\ GO:0003677-IEA;GO:0003700-IEA;GO:0006351-IEA;GO:0006355-IEA;GO:0005634-IEA \\ DNA binding-IEA;DNA-binding transcription factor activity-IEA;transcription, DNA-templated-IEA;regul		AP2/ERF domain	TRINITY_DN6926_c0_g1	FvH4_2g21550.1	2.0585	6.4295	4.371	3.12339	0.000795572	1	ethylene-responsive transcription factor 1B-like \\ 1.70E-170 \\ 62.36 % \\ GO:0003677-IEA;GO:0007165-IEA;GO:0043531-IEA \\ DNA binding-IEA;signal transduction-IEA;ADP binding-IEA	ethylene-responsive transcription factor 1	AP2/ERF domain	TRINITY_DN77170_c0_g2	FvH4_5g09520.1	0.95375	9.3135	8.35975	9.76514
TRINITY_DN6189_c1_g1	FvH4_4g03450.1	0.20125	7.19075	6.9895	35.7304	0.00133681	0.219999	ethylene-responsive transcription factor ERF096-like \\ 8.50E-144 \\ 67.36 % \\ GO:0051764-IEA;GO:0051764-IBA;GO:0051764-IDA;GO:0051017-IEA;GO:0051017-IDA;GO:0005737-IEA;GO:0005737-IDA;GO:0051015-IEA;GO:0051015-IPI;GO:0051015-IBA;GO:0003779-IEA;GO:0005509		AP2/ERF domain	TRINITY_DN12399_c0_g1	FvH4_4g24820.1	0.30875	2.2815	1.97275	7.38947	0.0028853	0.358162	DELLA protein RGL1-like \\ 0.00E+00 \\ 83.61 % \\ GO:0003700-IBA;GO:0052689-IEA;GO:0006355-IEA;GO:0043565-IBA;GO:0016787-IEA;GO:0005634-IBA \\ DNA-binding transcription factor activity-IBA;carboxylic ester hydrolase activity-IEA;regulation of transcriptio		Transcription factor GRAS	TRINITY_DN1603_c1_g1	FvH4_6g24120.1	1.94075	12.7175	10.7768	6.55288	1.39479e-05	0.0622743	heat stress transcription factor B-3	heat shock transcription factor, other eukaryote	Heat shock factor (HSF)-type, DNA-binding	TRINITY_DN6203_c0_g2	FvH4_2g13240.1	0.79425	4.3965	3.60225	5.53541	0.000744561	0.997291	ethylene-responsive transcription factor ABR1-like \\ 4.20E-72 \\ 76.48 % \\ GO:0003677-IEA;GO:0003700-IEA;GO:0006351-IEA;GO:0006355-IEA;GO:0005634-IEA \\ DNA binding-IEA;DNA-binding transcription factor activity-IEA;transcription, DNA-templated-IEA;regul		AP2/ERF domain	TRINITY_DN1603_c1_g1	FvH4_6g24120.1	1.334	12.036	10.702	9.02249
TRINITY_DN172294_c0_g1	FvH4_4g02610.1	0.05375	1.6025	1.54875	29.814	0.0220205	1	transcription factor bHLH92 \\ 4.90E-131 \\ 82.40 % \\ GO:0016192-IEA;GO:0016020-IEA;GO:0016021-IEA;GO:0005622-IEA;GO:0006886-IEA \\ vesicle-mediated transport-IEA;membrane-IEA;integral component of membrane-IEA;intracellular-IEA;intracellular protein tra		Myc-type, basic helix-loop-helix (bHLH) domain	TRINITY_DN9788_c1_g1	FvH4_3g08790.1	1.0005	2.96725	1.96675	2.96577	0.00298409	0.362646	ethylene-responsive transcription factor 12 \\ 2.10E-105 \\ 75.05 % \\ GO:0003677-IEA;GO:0003700-IEA;GO:0006351-IEA;GO:0006355-IEA;GO:0005634-IEA \\ DNA binding-IEA;DNA-binding transcription factor activity-IEA;transcription, DNA-templated-IEA;regulation		AP2/ERF domain	TRINITY_DN8438_c0_g1	FvH4_2g35010.1	1.141	7.196	6.055	6.30675	0.00280136	0.439051	transcription factor MYB44-like \\ 0.00E+00 \\ 86.82 % \\ GO:0000166-IEA;GO:0046872-IEA;GO:0120029-IEA;GO:0016020-IEA;GO:0016021-IEA;GO:0008553-IEA;GO:0006811-IEA;GO:0005524-IEA;GO:0016787-IEA;GO:0005886-IEA \\ nucleotide binding-IEA;metal ion binding-IEA		SANT/Myb domain	TRINITY_DN9672_c0_g1	FvH4_7g26930.1	22.4548	46.4903	24.0355	2.0704	0.000131708	0.6452	ethylene-responsive transcription factor ERF105-like \\ 0.00E+00 \\ 52.31 %	EREBP-like factor	AP2/ERF domain	TRINITY_DN1526_c0_g1	FvH4_5g03210.1	0.40925	3.01925	2.61	7.37752
TRINITY_DN2213_c0_g2	FvH4_1g07710.1	0.09875	2.521	2.42225	25.5291	5.43938e-05	0.038522	putative transcription factor bHLH041 isoform X1 \\ 0.00E+00 \\ 76.14 % \\ GO:0046983-IEA;GO:0016020-IEA;GO:0016021-IEA \\ protein dimerization activity-IEA;membrane-IEA;integral component of membrane-IEA \\ GO:0016020;GO:0046983 \\ membrane;protein dimer		Myc-type, basic helix-loop-helix (bHLH) domain	TRINITY_DN6944_c0_g1	FvH4_7g10080.1	0.675	6.50825	5.83325	9.64185	0.000454657	0.139369	ethylene-responsive transcription factor 13-like \\ 2.10E-125 \\ 94.15 % \\ GO:0016491-IEA;GO:0016020-IEA;GO:0016021-IEA;GO:0055114-IEA;GO:0009522-IEA;GO:0015979-IEA;GO:0009538-IEA \\ oxidoreductase activity-IEA;membrane-IEA;integral component of membrane		AP2/ERF domain	TRINITY_DN6926_c0_g1	FvH4_2g21550.1	1.07875	6.4295	5.35075	5.96014	2.9212e-06	0.0337671	ethylene-responsive transcription factor 1B-like \\ 1.70E-170 \\ 62.36 % \\ GO:0003677-IEA;GO:0007165-IEA;GO:0043531-IEA \\ DNA binding-IEA;signal transduction-IEA;ADP binding-IEA	ethylene-responsive transcription factor 1	AP2/ERF domain	TRINITY_DN2410_c0_g2	FvH4_5g01770.1	0.7225	1.72725	1.00475	2.39066	0.00194575	1	heat stress transcription factor B-2b \\ 0.00E+00 \\ 63.60 % \\ GO:0016020-IEA;GO:0016021-IEA \\ membrane-IEA;integral component of membrane-IEA	heat shock transcription factor, other eukaryote	Heat shock factor (HSF)-type, DNA-binding	TRINITY_DN6203_c0_g2	FvH4_2g13240.1	0.35425	2.518	2.16375	7.10797
TRINITY_DN503_c0_g1	FvH4_3g09340.1	0.38675	9.02375	8.637	23.3323	0.00255124	0.312942	heat stress transcription factor B-2a-like \\ 3.50E-100 \\ 77.59 % \\ GO:0000166-IEA;GO:0046177-IEA;GO:0046177-IBA;GO:0046316-IEA;GO:0046316-IBA;GO:0016310-IEA;GO:0016740-IEA;GO:0016301-IEA;GO:0005975-IEA;GO:0005524-IEA \\ nucleotide binding-IEA;D-glucona	heat shock transcription factor, other eukaryote	Heat shock factor (HSF)-type, DNA-binding	TRINITY_DN24531_c0_g2	FvH4_4g03470.1	2.224	62.1977	59.9737	27.9666	1.16633e-05	0.0236389	ethylene-responsive transcription factor 1B	ethylene-responsive transcription factor 1	AP2/ERF domain	TRINITY_DN6280_c0_g1	FvH4_2g26080.1	21.3395	105.868	84.5282	4.96112	0.000158857	0.147924	ethylene-responsive transcription factor ERF071	EREBP-like factor	AP2/ERF domain	TRINITY_DN1603_c1_g1	FvH4_6g24120.1	6.08575	12.7175	6.63175	2.08972	0.000324529	0.812826	heat stress transcription factor B-3	heat shock transcription factor, other eukaryote	Heat shock factor (HSF)-type, DNA-binding	TRINITY_DN503_c0_g1	FvH4_3g09340.1	0.65225	3.757	3.10475	5.76006
TRINITY_DN3017_c0_g1	FvH4_5g11930.1	2.5105	57.8032	55.2927	23.0246	2.13019e-05	0.0225278	transcription factor MYB108-like \\ 6.10E-118 \\ 63.74 % \\ GO:0004869-IEA;GO:0030414-IEA;GO:0010951-IEA;GO:0010466-IEA \\ cysteine-type endopeptidase inhibitor activity-IEA;peptidase inhibitor activity-IEA;negative regulation of endopeptidase activity-IE	transcription factor MYB, plant	SANT/Myb domain	TRINITY_DN6321_c0_g1	FvH4_6g02270.1	0.661	3.402	2.741	5.14675	0.000701561	0.168821	ethylene-responsive transcription factor 1B-like \\ 1.70E-11 \\ 54.73 % \\ GO:0003964-IEA;GO:0016779-IEA;GO:0008270-IEA;GO:0090502-IEA;GO:0005739-IEA;GO:0006278-IEA;GO:0016740-IEA;GO:0004523-IEA;GO:0003676-IEA \\ RNA-directed DNA polymerase activity-IEA;n	ethylene-responsive transcription factor 1	AP2/ERF domain	TRINITY_DN14173_c0_g1	FvH4_5g10850.1	1.578	7.12725	5.54925	4.51663	0.0310688	0.885713	transcription factor MYC2-like \\ 0.00E+00 \\ 73.19 % \\ GO:0046983-IEA \\ protein dimerization activity-IEA \\ GO:0046983 \\ protein dimerization activity		Myc-type, basic helix-loop-helix (bHLH) domain	TRINITY_DN34360_c0_g1	FvH4_6g10510.1	2.33325	5.405	3.07175	2.31651	0.00564029	1	probable WRKY transcription factor 33 \\ 0.00E+00 \\ 72.73 % \\ GO:0003677-IEA;GO:0003700-IEA;GO:0006355-IEA;GO:0043565-IEA;GO:0005634-IEA \\ DNA binding-IEA;DNA-binding transcription factor activity-IEA;regulation of transcription, DNA-templated-IEA;sequ	WRKY transcription factor 33	WRKY domain	TRINITY_DN8438_c0_g1	FvH4_2g35010.1	0.81175	4.6495	3.83775	5.72775
TRINITY_DN8530_c0_g1	FvH4_3g15320.1	0.271	5.73175	5.46075	21.1504	5.5511e-06	0.0157496	transcription factor MYB63 \\ 0.00E+00 \\ 61.65 % \\ GO:0003677-IEA;GO:0030154-IBA;GO:0044212-IBA;GO:0043565-IBA;GO:0005634-IBA \\ DNA binding-IEA;cell differentiation-IBA;transcription regulatory region DNA binding-IBA;sequence-specific DNA binding-IBA;n	transcription factor MYB, plant	SANT/Myb domain	TRINITY_DN6926_c0_g1	FvH4_2g21550.1	0.511	8.843	8.332	17.3053	0.00211163	0.302854	ethylene-responsive transcription factor 1B-like \\ 1.70E-170 \\ 62.36 % \\ GO:0003677-IEA;GO:0007165-IEA;GO:0043531-IEA \\ DNA binding-IEA;signal transduction-IEA;ADP binding-IEA	ethylene-responsive transcription factor 1	AP2/ERF domain	TRINITY_DN2834_c0_g1	FvH4_6g28650.1	9.93425	39.724	29.7898	3.99869	0.00581104	0.614769	probable WRKY transcription factor 40 \\ 2.90E-72 \\ 87.96 % \\ GO:0003677-IEA;GO:0003700-IEA;GO:0006355-IEA;GO:0043565-IEA;GO:0005634-IEA \\ DNA binding-IEA;DNA-binding transcription factor activity-IEA;regulation of transcription, DNA-templated-IEA;sequ		WRKY domain	TRINITY_DN2834_c0_g1	FvH4_6g28650.1	13.7145	39.724	26.0095	2.8965	0.011867	1	probable WRKY transcription factor 40 \\ 2.90E-72 \\ 87.96 % \\ GO:0003677-IEA;GO:0003700-IEA;GO:0006355-IEA;GO:0043565-IEA;GO:0005634-IEA \\ DNA binding-IEA;DNA-binding transcription factor activity-IEA;regulation of transcription, DNA-templated-IEA;sequ		WRKY domain	TRINITY_DN15179_c0_g1	FvH4_6g38750.1	0.4955	2.74725	2.25175	5.5444
TRINITY_DN6944_c0_g1	FvH4_7g10080.1	0.30825	6.50825	6.2	21.1135	0.000279274	0.095278	ethylene-responsive transcription factor 13-like \\ 2.10E-125 \\ 94.15 % \\ GO:0016491-IEA;GO:0016020-IEA;GO:0016021-IEA;GO:0055114-IEA;GO:0009522-IEA;GO:0015979-IEA;GO:0009538-IEA \\ oxidoreductase activity-IEA;membrane-IEA;integral component of membrane		AP2/ERF domain	TRINITY_DN6189_c1_g2	FvH4_5g19840.1	22.9168	105.834	82.9172	4.61819	0.00128774	0.234603	ethylene-responsive transcription factor 2 \\ 4.50E-106 \\ 71.65 %	EREBP-like factor	AP2/ERF domain	TRINITY_DN77170_c0_g2	FvH4_5g09520.1	1.7925	7.1125	5.32	3.96792	0.00151106	0.331226	ethylene-responsive transcription factor ERF114-like \\ 1.40E-149 \\ 88.82 % \\ GO:0003677-IEA;GO:0003700-IEA;GO:0006351-IEA;GO:0046983-IEA;GO:0006355-IEA;GO:0000977-IEA;GO:0005634-IEA;GO:0045944-IEA \\ DNA binding-IEA;DNA-binding transcription factor act		AP2/ERF domain	TRINITY_DN12946_c0_g1	FvH4_6g53770.1	1.87175	5.24775	3.376	2.80366	8.47242e-05	0.55534	probable WRKY transcription factor 75 \\ 2.00E-51 \\ 93.84 % \\ GO:0003677-IEA;GO:0003700-IEA;GO:0006355-IEA;GO:0043565-IEA;GO:0005634-IEA \\ DNA binding-IEA;DNA-binding transcription factor activity-IEA;regulation of transcription, DNA-templated-IEA;sequ		WRKY domain	TRINITY_DN8530_c0_g1	FvH4_3g15320.1	0.346	1.8355	1.4895	5.30491
TRINITY_DN3537_c0_g1	FvH4_7g16150.1	6.65925	139.386	132.727	20.9312	9.28236e-07	0.00673267	probable WRKY transcription factor 46 \\ 1.10E-124 \\ 80.90 % \\ GO:0003677-IEA;GO:0003700-IEA;GO:0006355-IEA;GO:0043565-IEA;GO:0005634-IEA \\ DNA binding-IEA;DNA-binding transcription factor activity-IEA;regulation of transcription, DNA-templated-IEA;seq		WRKY domain	TRINITY_DN113_c4_g1	FvH4_7g26920.1	7.526	35.8897	28.3637	4.76877	2.20457e-05	0.0318432	ethylene-responsive transcription factor 2-like \\ 3.40E-170 \\ 64.54 % \\ GO:0003677-IEA;GO:0003700-IEA;GO:0006351-IEA;GO:0006355-IEA;GO:0005634-IEA \\ DNA binding-IEA;DNA-binding transcription factor activity-IEA;transcription, DNA-templated-IEA;regulat	EREBP-like factor	AP2/ERF domain	TRINITY_DN8530_c0_g1	FvH4_3g15320.1	0.42075	1.65675	1.236	3.93761	0.00568464	0.60628	transcription factor MYB63 \\ 0.00E+00 \\ 61.65 % \\ GO:0003677-IEA;GO:0030154-IBA;GO:0044212-IBA;GO:0043565-IBA;GO:0005634-IBA \\ DNA binding-IEA;cell differentiation-IBA;transcription regulatory region DNA binding-IBA;sequence-specific DNA binding-IBA;n	transcription factor MYB, plant	SANT/Myb domain	TRINITY_DN6051_c0_g1	FvH4_4g23480.1	8.76025	20.689	11.9288	2.36169	0.0063121	1	probable WRKY transcription factor 75 \\ 3.40E-57 \\ 96.31 % \\ GO:0003677-IEA;GO:0003700-IEA;GO:0006355-IEA;GO:0043565-IEA;GO:0005634-IEA \\ DNA binding-IEA;DNA-binding transcription factor activity-IEA;regulation of transcription, DNA-templated-IEA;sequ		WRKY domain	TRINITY_DN6280_c0_g1	FvH4_2g26080.1	15.3448	73.0048	57.66	4.75764
TRINITY_DN24531_c0_g2	FvH4_4g03470.1	3.99375	62.1977	58.204	15.5738	1.45267e-05	0.0201682	ethylene-responsive transcription factor 1B	ethylene-responsive transcription factor 1	AP2/ERF domain	TRINITY_DN6944_c0_g2	FvH4_7g10070.1	0.68475	4.572	3.88725	6.67689	6.01348e-05	0.0509932	ethylene-responsive transcription factor 2-like \\ 8.80E-22 \\ 74.99 % \\ GO:0046872-IEA \\ metal ion binding-IEA \\ GO:0046872 \\ metal ion binding		AP2/ERF domain	TRINITY_DN12399_c0_g1	FvH4_4g24820.1	0.304	1.18325	0.87925	3.89227	4.68157e-06	0.037954	DELLA protein RGL1-like \\ 0.00E+00 \\ 83.61 % \\ GO:0003700-IBA;GO:0052689-IEA;GO:0006355-IEA;GO:0043565-IBA;GO:0016787-IEA;GO:0005634-IBA \\ DNA-binding transcription factor activity-IBA;carboxylic ester hydrolase activity-IEA;regulation of transcriptio		Transcription factor GRAS	TRINITY_DN3017_c0_g1	FvH4_5g11930.1	4.382	10.537	6.155	2.40461	0.00265095	1	transcription factor MYB108-like \\ 6.10E-118 \\ 63.74 % \\ GO:0004869-IEA;GO:0030414-IEA;GO:0010951-IEA;GO:0010466-IEA \\ cysteine-type endopeptidase inhibitor activity-IEA;peptidase inhibitor activity-IEA;negative regulation of endopeptidase activity-IE	transcription factor MYB, plant	SANT/Myb domain	TRINITY_DN22388_c0_g2	FvH4_4g03610.1	2.58225	11.8303	9.248	4.58137
TRINITY_DN35309_c0_g3	FvH4_5g05180.1	0.29775	4.512	4.21425	15.1537	7.08206e-05	0.0446566	transcription factor bHLH162-like \\ 6.10E-113 \\ 56.26 % \\ GO:0003677-IEA;GO:0006355-IEA \\ DNA binding-IEA;regulation of transcription, DNA-templated-IEA		Myc-type, basic helix-loop-helix (bHLH) domain	TRINITY_DN15604_c0_g1	FvH4_2g22290.1	0.31075	1.23775	0.927	3.98311	0.0412326	1	ethylene-responsive transcription factor 3-like		AP2/ERF domain	TRINITY_DN2837_c0_g2	FvH4_1g22820.1	1.83	6.90775	5.07775	3.77473	0.0415664	0.885713	probable WRKY transcription factor 51 \\ 5.70E-44 \\ 86.10 % \\ GO:0000166-IEA;GO:0048544-IEA;GO:0016020-IEA;GO:0016021-IEA;GO:0016310-IEA;GO:0016740-IEA;GO:0004672-IEA;GO:0016301-IEA;GO:0004674-IEA;GO:0005524-IEA;GO:0006468-IEA \\ nucleotide binding-IEA;		WRKY domain	TRINITY_DN8438_c0_g1	FvH4_2g35010.1	3.17625	7.196	4.01975	2.26556	0.0250732	1	transcription factor MYB44-like \\ 0.00E+00 \\ 86.82 % \\ GO:0000166-IEA;GO:0046872-IEA;GO:0120029-IEA;GO:0016020-IEA;GO:0016021-IEA;GO:0008553-IEA;GO:0006811-IEA;GO:0005524-IEA;GO:0016787-IEA;GO:0005886-IEA \\ nucleotide binding-IEA;metal ion binding-IEA		SANT/Myb domain	TRINITY_DN6926_c0_g1	FvH4_2g21550.1	0.77125	3.46575	2.6945	4.49368
TRINITY_DN6051_c0_g1	FvH4_4g23480.1	4.54375	67.4045	62.8607	14.8346	4.48575e-06	0.0143511	probable WRKY transcription factor 75 \\ 3.40E-57 \\ 96.31 % \\ GO:0003677-IEA;GO:0003700-IEA;GO:0006355-IEA;GO:0043565-IEA;GO:0005634-IEA \\ DNA binding-IEA;DNA-binding transcription factor activity-IEA;regulation of transcription, DNA-templated-IEA;sequ		WRKY domain	TRINITY_DN233_c0_g1	FvH4_3g08750.1	15.2215	31.4202	16.1987	2.0642	0.0265648	1	ethylene-responsive transcription factor 4 \\ 7.20E-106 \\ 75.00 % \\ GO:0003677-IEA;GO:0003700-IEA;GO:0006351-IEA;GO:0006355-IEA;GO:0005634-IEA \\ DNA binding-IEA;DNA-binding transcription factor activity-IEA;transcription, DNA-templated-IEA;regulation o	EREBP-like factor	AP2/ERF domain	TRINITY_DN22388_c0_g2	FvH4_4g03610.1	3.657	13.6623	10.0053	3.73592	0.00424313	0.527324	myb-related protein Myb4-like \\ 6.40E-91 \\ 73.96 % \\ GO:0003677-IEA;GO:0016020-IEA;GO:0016021-IEA;GO:0044212-IBA;GO:0030154-IBA;GO:0043565-IBA;GO:0005634-IBA \\ DNA binding-IEA;membrane-IEA;integral component of membrane-IEA;transcription regulatory re	transcription factor MYB, plant	SANT/Myb domain	TRINITY_DN180429_c0_g1	FvH4_1g25360.1	1.3365	4.44925	3.11275	3.32903	0.0230783	1	protein DOG1-like 4 \\ 0.00E+00 \\ 78.97 % \\ GO:0035235-IEA;GO:0016020-IEA;GO:0016021-IEA;GO:0004970-IEA;GO:0006811-IEA \\ ionotropic glutamate receptor signaling pathway-IEA;membrane-IEA;integral component of membrane-IEA;ionotropic glutamate receptor a		Transcription factor TGA like domain	TRINITY_DN2834_c0_g1	FvH4_6g28650.1	5.36775	22.59	17.2222	4.20847
TRINITY_DN6203_c0_g2	FvH4_2g13240.1	0.8655	12.3432	11.4778	14.2614	0.000185137	0.0750462	ethylene-responsive transcription factor ABR1-like \\ 4.20E-72 \\ 76.48 % \\ GO:0003677-IEA;GO:0003700-IEA;GO:0006351-IEA;GO:0006355-IEA;GO:0005634-IEA \\ DNA binding-IEA;DNA-binding transcription factor activity-IEA;transcription, DNA-templated-IEA;regul		AP2/ERF domain	TRINITY_DN6203_c0_g2	FvH4_2g13240.1	0.49575	12.3432	11.8475	24.8981	0.000147249	0.0767602	ethylene-responsive transcription factor ABR1-like \\ 4.20E-72 \\ 76.48 % \\ GO:0003677-IEA;GO:0003700-IEA;GO:0006351-IEA;GO:0006355-IEA;GO:0005634-IEA \\ DNA binding-IEA;DNA-binding transcription factor activity-IEA;transcription, DNA-templated-IEA;regul		AP2/ERF domain	TRINITY_DN20143_c0_g1	FvH4_5g15340.1	0.906	3.2705	2.3645	3.60982	0.00338411	0.476483	probable WRKY transcription factor 61 \\ 0.00E+00 \\ 74.70 % \\ GO:0003677-IEA;GO:0003700-IEA;GO:0006355-IEA;GO:0043565-IEA;GO:0005634-IEA \\ DNA binding-IEA;DNA-binding transcription factor activity-IEA;regulation of transcription, DNA-templated-IEA;sequ		WRKY domain	Total upregulated genes=	14										TRINITY_DN3017_c0_g1	FvH4_5g11930.1	2.45	10.172	7.722	4.15184
TRINITY_DN1603_c1_g1	FvH4_6g24120.1	2.338	28.8305	26.4925	12.3313	2.45428e-05	0.0246004	heat stress transcription factor B-3	heat shock transcription factor, other eukaryote	Heat shock factor (HSF)-type, DNA-binding	TRINITY_DN6280_c0_g1	FvH4_2g26080.1	32.6245	114.259	81.6345	3.50225	4.10835e-05	0.0420505	ethylene-responsive transcription factor ERF071	EREBP-like factor	AP2/ERF domain	TRINITY_DN6051_c0_g1	FvH4_4g23480.1	5.864	20.689	14.825	3.52814	0.00227938	0.403568	probable WRKY transcription factor 75 \\ 3.40E-57 \\ 96.31 % \\ GO:0003677-IEA;GO:0003700-IEA;GO:0006355-IEA;GO:0043565-IEA;GO:0005634-IEA \\ DNA binding-IEA;DNA-binding transcription factor activity-IEA;regulation of transcription, DNA-templated-IEA;sequ		WRKY domain												TRINITY_DN12946_c0_g1	FvH4_6g53770.1	0.92075	3.51	2.58925	3.81211
TRINITY_DN510_c1_g1	FvH4_2g33720.1	0.522	6.0185	5.4965	11.5297	0.000134089	0.062074	putative transcription factor MYC/MYB \\ 0.00E+00 \\ 84.72 %		Transcription factor MYC/MYB N-terminal	TRINITY_DN6189_c1_g1	FvH4_4g03450.1	0.06625	7.19075	7.1245	108.54	0.00119742	0.226611	ethylene-responsive transcription factor ERF096-like \\ 8.50E-144 \\ 67.36 % \\ GO:0051764-IEA;GO:0051764-IBA;GO:0051764-IDA;GO:0051017-IEA;GO:0051017-IDA;GO:0005737-IEA;GO:0005737-IDA;GO:0051015-IEA;GO:0051015-IPI;GO:0051015-IBA;GO:0003779-IEA;GO:0005509		AP2/ERF domain	TRINITY_DN1526_c0_g1	FvH4_5g03210.1	0.918	3.13675	2.21875	3.41694	0.00226398	0.402853	probable WRKY transcription factor 29 isoform X1 \\ 2.50E-15 \\ 89.14 % \\ GO:0003700-IEA;GO:0006355-IEA \\ DNA-binding transcription factor activity-IEA;regulation of transcription, DNA-templated-IEA \\ GO:0003700;GO:0006355 \\ DNA-binding transcription		WRKY domain	Downregulated genes											TRINITY_DN34360_c0_g1	FvH4_6g10510.1	1.3595	5.12275	3.76325	3.76811
TRINITY_DN12946_c0_g1	FvH4_6g53770.1	1.74225	19.927	18.1848	11.4375	2.99005e-05	0.0270762	probable WRKY transcription factor 75 \\ 2.00E-51 \\ 93.84 % \\ GO:0003677-IEA;GO:0003700-IEA;GO:0006355-IEA;GO:0043565-IEA;GO:0005634-IEA \\ DNA binding-IEA;DNA-binding transcription factor activity-IEA;regulation of transcription, DNA-templated-IEA;sequ		WRKY domain	TRINITY_DN838_c0_g4	FvH4_4g03460.1	0.02225	1.363	1.34075	61.2584	0.0105132	0.703862	ethylene-responsive transcription factor ERF098		AP2/ERF domain	TRINITY_DN12946_c0_g1	FvH4_6g53770.1	1.54575	5.24775	3.702	3.39495	2.45256e-05	0.0778929	probable WRKY transcription factor 75 \\ 2.00E-51 \\ 93.84 % \\ GO:0003677-IEA;GO:0003700-IEA;GO:0006355-IEA;GO:0043565-IEA;GO:0005634-IEA \\ DNA binding-IEA;DNA-binding transcription factor activity-IEA;regulation of transcription, DNA-templated-IEA;sequ		WRKY domain	TRINITY_DN264_c2_g1	FvH4_6g37880.1	3.93575	1.27875	-2.657	-3.07781	0.0114459	1	SHATTERPROOF-like protein \\ 7.00E-90 \\ 90.27 % \\ GO:0003677-IEA;GO:0003700-IEA;GO:0006351-IEA;GO:0046983-IEA;GO:0006355-IEA;GO:0000977-IEA;GO:0005634-IEA;GO:0045944-IEA \\ DNA binding-IEA;DNA-binding transcription factor activity-IEA;transcription, DNA	MADS-box transcription factor, plant	Transcription factor, MADS-box	TRINITY_DN9672_c0_g1	FvH4_7g26930.1	9.931	37.4047	27.4738	3.76646
TRINITY_DN2837_c0_g2	FvH4_1g22820.1	1.8475	20.6208	18.7733	11.1614	7.84952e-06	0.0173971	probable WRKY transcription factor 51 \\ 5.70E-44 \\ 86.10 % \\ GO:0000166-IEA;GO:0048544-IEA;GO:0016020-IEA;GO:0016021-IEA;GO:0016310-IEA;GO:0016740-IEA;GO:0004672-IEA;GO:0016301-IEA;GO:0004674-IEA;GO:0005524-IEA;GO:0006468-IEA \\ nucleotide binding-IEA;		WRKY domain	TRINITY_DN6321_c0_g2	FvH4_2g21560.1	0.021	2.7615	2.7405	131.5	0.000138474	0.0746657	ethylene-responsive transcription factor ERF098-like \\ 0.00E+00 \\ 99.70 % \\ GO:0006616-IEA;GO:0000166-IEA;GO:0006515-IEA;GO:0005829-IEA;GO:0051082-IEA;GO:0005524-IEA;GO:0016887-IEA;GO:0006457-IEA \\ SRP-dependent cotranslational protein targeting to me		AP2/ERF domain	TRINITY_DN7613_c0_g1	FvH4_1g26490.1	3.2075	10.3513	7.14375	3.2272	0.00144951	0.326141	putative transcription factor WD40-like family \\ 0.00E+00 \\ 84.75 % \\ GO:0008233-IEA;GO:0006508-IEA \\ peptidase activity-IEA;proteolysis-IEA \\ GO:0006508;GO:0008233 \\ proteolysis;peptidase activity		WD40-like Beta Propeller	TRINITY_DN5400_c1_g1	FvH4_6g26090.1	1.94875	0.67175	-1.277	-2.901	0.0370645	1	ethylene-responsive transcription factor ERF054-like \\ 0.00E+00 \\ 59.83 % \\ GO:0003677-IEA;GO:0003700-IEA;GO:0006351-IEA;GO:0006355-IEA;GO:0005634-IEA \\ DNA binding-IEA;DNA-binding transcription factor activity-IEA;transcription, DNA-templated-IEA;reg		AP2/ERF domain	TRINITY_DN20143_c0_g1	FvH4_5g15340.1	0.7235	2.7135	1.99	3.75052
TRINITY_DN7613_c0_g1	FvH4_1g26490.1	6.623	72.6397	66.0167	10.9678	0.0158689	0.84632	putative transcription factor WD40-like family \\ 0.00E+00 \\ 84.75 % \\ GO:0008233-IEA;GO:0006508-IEA \\ peptidase activity-IEA;proteolysis-IEA \\ GO:0006508;GO:0008233 \\ proteolysis;peptidase activity		WD40-like Beta Propeller	TRINITY_DN9672_c0_g1	FvH4_7g26930.1	25.0135	147.193	122.179	5.88453	1.80739e-05	0.0299651	ethylene-responsive transcription factor ERF105-like \\ 0.00E+00 \\ 52.31 %	EREBP-like factor	AP2/ERF domain	TRINITY_DN6189_c1_g2	FvH4_5g19840.1	19.1453	61.1878	42.0425	3.19598	0.00393894	0.50986	ethylene-responsive transcription factor 2 \\ 4.50E-106 \\ 71.65 %	EREBP-like factor	AP2/ERF domain	TRINITY_DN231_c4_g1	FvH4_2g02340.1	2.9225	1.24925	-1.67325	-2.3394	0.00226925	1	transcription factor bHLH18-like \\ 0.00E+00 \\ 74.64 % \\ GO:0003677-IEA;GO:0046983-IEA;GO:0016020-IEA;GO:0016021-IEA \\ DNA binding-IEA;protein dimerization activity-IEA;membrane-IEA;integral component of membrane-IEA \\ GO:0046983 \\ protein dimerizati		Myc-type, basic helix-loop-helix (bHLH) domain	TRINITY_DN6051_c0_g1	FvH4_4g23480.1	4.87725	15.6595	10.7822	3.21072
TRINITY_DN34360_c0_g1	FvH4_6g10510.1	1.448	15.245	13.797	10.5283	1.99372e-06	0.00930613	probable WRKY transcription factor 33 \\ 0.00E+00 \\ 72.73 % \\ GO:0003677-IEA;GO:0003700-IEA;GO:0006355-IEA;GO:0043565-IEA;GO:0005634-IEA \\ DNA binding-IEA;DNA-binding transcription factor activity-IEA;regulation of transcription, DNA-templated-IEA;sequ	WRKY transcription factor 33	WRKY domain	TRINITY_DN275_c2_g1	FvH4_2g18520.1	4.744	9.532	4.788	2.00927	3.07229e-05	0.0367209	ethylene-responsive transcription factor-like protein At4g13040 \\ 1.30E-126 \\ 78.39 % \\ GO:0003677-IEA;GO:0003700-IEA;GO:0006355-IEA;GO:0005634-IEA \\ DNA binding-IEA;DNA-binding transcription factor activity-IEA;regulation of transcription, DNA-templa		AP2/ERF domain	TRINITY_DN9672_c0_g1	FvH4_7g26930.1	15.336	46.4903	31.1543	3.03145	0.000114522	0.129178	ethylene-responsive transcription factor ERF105-like \\ 0.00E+00 \\ 52.31 %	EREBP-like factor	AP2/ERF domain	TRINITY_DN2469_c0_g1	FvH4_3g34960.1	5.898	2.538	-3.36	-2.32388	0.0078058	1	transcription factor MYB59 \\ 0.00E+00 \\ 78.28 % \\ GO:0000165-IEA;GO:0004713-IEA;GO:0000186-IEA;GO:0016020-IEA;GO:0016021-IEA;GO:0004709-IEA;GO:0016310-IEA;GO:0016740-IEA;GO:0016301-IEA;GO:0016787-IEA;GO:0018108-IEA;GO:0007165-IEA;GO:0043531-IEA;GO:0004	transcription factor MYB, plant	SANT/Myb domain	TRINITY_DN7613_c0_g1	FvH4_1g26490.1	3.462	11.11	7.648	3.20913
TRINITY_DN12399_c0_g1	FvH4_4g24820.1	0.244	2.2815	2.0375	9.35041	0.00253787	0.312487	DELLA protein RGL1-like \\ 0.00E+00 \\ 83.61 % \\ GO:0003700-IBA;GO:0052689-IEA;GO:0006355-IEA;GO:0043565-IBA;GO:0016787-IEA;GO:0005634-IBA \\ DNA-binding transcription factor activity-IBA;carboxylic ester hydrolase activity-IEA;regulation of transcriptio		Transcription factor GRAS	TRINITY_DN534_c0_g1	FvH4_2g10220.1	7.4845	19.404	11.9195	2.59256	2.59992e-05	0.0343758	GATA transcription factor 5-like \\ 0.00E+00 \\ 62.77 % \\ GO:0003677-IEA;GO:0003700-IEA;GO:0008270-IEA;GO:0046872-IEA;GO:0045893-IEA;GO:0006355-IEA;GO:0043565-IEA;GO:0005634-IEA \\ DNA binding-IEA;DNA-binding transcription factor activity-IEA;zinc ion bi		Zinc finger, GATA-type	TRINITY_DN3017_c0_g1	FvH4_5g11930.1	3.6315	10.537	6.9055	2.90156	0.00221115	0.398931	transcription factor MYB108-like \\ 6.10E-118 \\ 63.74 % \\ GO:0004869-IEA;GO:0030414-IEA;GO:0010951-IEA;GO:0010466-IEA \\ cysteine-type endopeptidase inhibitor activity-IEA;peptidase inhibitor activity-IEA;negative regulation of endopeptidase activity-IE	transcription factor MYB, plant	SANT/Myb domain	TRINITY_DN10540_c0_g1	FvH4_7g05970.1	1.83	0.8275	-1.0025	-2.21148	0.0303271	1	trihelix transcription factor PTL-like \\ 5.40E-161 \\ 72.76 % \\ GO:0003700-IBA;GO:0006355-IEA;GO:0043565-IBA;GO:0005634-IBA \\ DNA-binding transcription factor activity-IBA;regulation of transcription, DNA-templated-IEA;sequence-specific DNA binding-IBA		Myb-like domain	TRINITY_DN5894_c0_g1	FvH4_4g22650.1	6.9095	22.0643	15.1547	3.19332
TRINITY_DN6944_c0_g2	FvH4_7g10070.1	0.52775	4.572	4.04425	8.66319	4.16448e-05	0.0329617	ethylene-responsive transcription factor 2-like \\ 8.80E-22 \\ 74.99 % \\ GO:0046872-IEA \\ metal ion binding-IEA \\ GO:0046872 \\ metal ion binding		AP2/ERF domain	TRINITY_DN3462_c1_g1	FvH4_4g13230.1	5.51425	15.638	10.1237	2.83593	8.66615e-06	0.0207542	heat stress transcription factor A-5 \\ 0.00E+00 \\ 84.95 % \\ GO:0003677-IEA;GO:0003700-IEA;GO:0006355-IEA;GO:0043565-IEA;GO:0005634-IEA \\ DNA binding-IEA;DNA-binding transcription factor activity-IEA;regulation of transcription, DNA-templated-IEA;seque	heat shock transcription factor, other eukaryote	Heat shock factor (HSF)-type, DNA-binding	TRINITY_DN15179_c0_g1	FvH4_6g38750.1	0.9175	2.65375	1.73625	2.89237	1.69465e-05	0.0677564	transcription factor JUNGBRUNNEN 1-like \\ 7.80E-15 \\ 65.14 % \\ GO:0016779-IEA;GO:0003964-IEA;GO:0008270-IEA;GO:0006278-IEA;GO:0016740-IEA;GO:0003676-IEA \\ nucleotidyltransferase activity-IEA;RNA-directed DNA polymerase activity-IEA;zinc ion binding-IE		NAC domain	Total downregulated genes=	5										TRINITY_DN6189_c1_g2	FvH4_5g19840.1	13.891	37.0767	23.1857	2.66912
TRINITY_DN6167_c0_g1	FvH4_2g41060.1	1.5985	13.4108	11.8123	8.38958	6.60982e-05	0.0433426	probable WRKY transcription factor 40 isoform X1 \\ 0.00E+00 \\ 66.88 % \\ GO:0003677-IEA;GO:0003700-IEA;GO:0006355-IEA;GO:0043565-IEA;GO:0005634-IEA \\ DNA binding-IEA;DNA-binding transcription factor activity-IEA;regulation of transcription, DNA-templat		WRKY domain	TRINITY_DN503_c0_g1	FvH4_3g09340.1	1.7595	9.02375	7.26425	5.12859	0.007151	0.57595	heat stress transcription factor B-2a-like \\ 3.50E-100 \\ 77.59 % \\ GO:0000166-IEA;GO:0046177-IEA;GO:0046177-IBA;GO:0046316-IEA;GO:0046316-IBA;GO:0016310-IEA;GO:0016740-IEA;GO:0016301-IEA;GO:0005975-IEA;GO:0005524-IEA \\ nucleotide binding-IEA;D-glucona	heat shock transcription factor, other eukaryote	Heat shock factor (HSF)-type, DNA-binding	TRINITY_DN5894_c0_g1	FvH4_4g22650.1	8.6835	23.9645	15.281	2.75977	0.000573189	0.226678	ethylene-responsive transcription factor ERF113 \\ 2.10E-63 \\ 69.39 % \\ GO:0003677-IEA;GO:0003700-IEA;GO:0045893-IEA;GO:0071497-IEA;GO:0019760-IEA;GO:0006351-IEA;GO:0009751-IEA;GO:0009651-IEA;GO:0006355-IEA;GO:0009414-IEA;GO:0009753-IEA;GO:0043565-IEA;G		AP2/ERF domain	Total DEGs=	19										TRINITY_DN22388_c0_g1	FvH4_2g21500.1	2.05575	4.943	2.88725	2.40448
TRINITY_DN2834_c0_g1	FvH4_6g28650.1	7.4875	62.7185	55.231	8.37643	0.000359871	0.108585	probable WRKY transcription factor 40 \\ 2.90E-72 \\ 87.96 % \\ GO:0003677-IEA;GO:0003700-IEA;GO:0006355-IEA;GO:0043565-IEA;GO:0005634-IEA \\ DNA binding-IEA;DNA-binding transcription factor activity-IEA;regulation of transcription, DNA-templated-IEA;sequ		WRKY domain	TRINITY_DN2410_c0_g2	FvH4_5g01770.1	0.78175	1.59875	0.817	2.04509	0.0332132	1	heat stress transcription factor B-2b \\ 0.00E+00 \\ 63.60 % \\ GO:0016020-IEA;GO:0016021-IEA \\ membrane-IEA;integral component of membrane-IEA	heat shock transcription factor, other eukaryote	Heat shock factor (HSF)-type, DNA-binding	TRINITY_DN3537_c0_g1	FvH4_7g16150.1	8.03225	21.3062	13.274	2.65259	0.0353827	0.885713	probable WRKY transcription factor 46 \\ 1.10E-124 \\ 80.90 % \\ GO:0003677-IEA;GO:0003700-IEA;GO:0006355-IEA;GO:0043565-IEA;GO:0005634-IEA \\ DNA binding-IEA;DNA-binding transcription factor activity-IEA;regulation of transcription, DNA-templated-IEA;seq		WRKY domain												TRINITY_DN2695_c1_g5	FvH4_6g26360.1	0.7125	1.692	0.9795	2.37474
TRINITY_DN6280_c0_g1	FvH4_2g26080.1	13.9527	114.259	100.306	8.189	1.07932e-05	0.0200337	ethylene-responsive transcription factor ERF071	EREBP-like factor	AP2/ERF domain	TRINITY_DN1603_c1_g1	FvH4_6g24120.1	5.5325	28.8305	23.298	5.21112	7.57846e-05	0.0556309	heat stress transcription factor B-3	heat shock transcription factor, other eukaryote	Heat shock factor (HSF)-type, DNA-binding	TRINITY_DN1439_c0_g1	FvH4_7g15350.1	2.09275	5.50125	3.4085	2.62872	3.15344e-05	0.0852177	WRKY transcription factor 22 \\ 5.80E-92 \\ 47.14 % \\ GO:0007094-IEA \\ mitotic spindle assembly checkpoint-IEA	WRKY transcription factor 22	WRKY domain												TRINITY_DN9942_c0_g1	FvH4_1g16030.1	44.0553	100.684	56.629	2.28541
TRINITY_DN9672_c0_g1	FvH4_7g26930.1	19.5245	147.193	127.668	7.53887	1.62304e-05	0.0202091	ethylene-responsive transcription factor ERF105-like \\ 0.00E+00 \\ 52.31 %	EREBP-like factor	AP2/ERF domain	TRINITY_DN22388_c0_g2	FvH4_4g03610.1	6.788	25.146	18.358	3.70448	0.000175135	0.0848329	myb-related protein Myb4-like \\ 6.40E-91 \\ 73.96 % \\ GO:0003677-IEA;GO:0016020-IEA;GO:0016021-IEA;GO:0044212-IBA;GO:0030154-IBA;GO:0043565-IBA;GO:0005634-IBA \\ DNA binding-IEA;membrane-IEA;integral component of membrane-IEA;transcription regulatory re	transcription factor MYB, plant	SANT/Myb domain	TRINITY_DN1087_c0_g2	FvH4_3g36720.1	8.708	21.98	13.272	2.52412	0.00045087	0.206133	scarecrow-like protein 30 \\ 0.00E+00 \\ 76.10 %		Transcription factor GRAS												TRINITY_DN3537_c0_g1	FvH4_7g16150.1	9.2855	21.1755	11.89	2.28049
TRINITY_DN6926_c0_g1	FvH4_2g21550.1	1.216	8.843	7.627	7.2722	0.00326104	0.355142	ethylene-responsive transcription factor 1B-like \\ 1.70E-170 \\ 62.36 % \\ GO:0003677-IEA;GO:0007165-IEA;GO:0043531-IEA \\ DNA binding-IEA;signal transduction-IEA;ADP binding-IEA	ethylene-responsive transcription factor 1	AP2/ERF domain	TRINITY_DN9945_c0_g1	FvH4_2g16180.1	5.77925	19.752	13.9727	3.41774	0.000108158	0.0663594	NAC transcription factor \\ 1.10E-67 \\ 92.41 % \\ GO:0003677-IEA;GO:0045792-IEA;GO:0006355-IEA;GO:0010200-IEA;GO:0005634-IEA;GO:0009965-IEA;GO:0048281-IEA \\ DNA binding-IEA;negative regulation of cell size-IEA;regulation of transcription, DNA-templated-		NAC domain	TRINITY_DN24531_c0_g2	FvH4_4g03470.1	4.2445	10.4322	6.18775	2.45783	0.0345223	0.885713	ethylene-responsive transcription factor 1B	ethylene-responsive transcription factor 1	AP2/ERF domain												TRINITY_DN19775_c0_g1	FvH4_3g03680.1	0.61075	1.38725	0.7765	2.27139
TRINITY_DN15179_c0_g1	FvH4_6g38750.1	0.4275	2.9975	2.57	7.0117	8.39864e-06	0.0179678	transcription factor JUNGBRUNNEN 1-like \\ 7.80E-15 \\ 65.14 % \\ GO:0016779-IEA;GO:0003964-IEA;GO:0008270-IEA;GO:0006278-IEA;GO:0016740-IEA;GO:0003676-IEA \\ nucleotidyltransferase activity-IEA;RNA-directed DNA polymerase activity-IEA;zinc ion binding-IE		NAC domain	TRINITY_DN10034_c0_g1	FvH4_4g31070.1	19.0725	48.1915	29.119	2.52675	0.00113948	0.219219	NAC transcription factor 29 \\ 4.20E-35 \\ 56.75 % \\ GO:0010112-IEA \\ regulation of systemic acquired resistance-IEA \\ GO:0010112 \\ regulation of systemic acquired resistance		NAC domain	TRINITY_DN2695_c1_g5	FvH4_6g26360.1	0.8615	2.08875	1.22725	2.42455	0.00850368	0.740245	transcription factor bHLH162-like \\ 2.40E-98 \\ 92.10 % \\ GO:0045893-IBA;GO:0005634-IBA \\ positive regulation of transcription, DNA-templated-IBA;nucleus-IBA \\ GO:0005634;GO:0045893 \\ nucleus;positive regulation of transcription, DNA-templated		Myc-type, basic helix-loop-helix (bHLH) domain												TRINITY_DN9945_c0_g1	FvH4_2g16180.1	6.25625	14.0523	7.796	2.24611
TRINITY_DN15604_c0_g1	FvH4_2g22290.1	0.17825	1.23775	1.0595	6.9439	0.0249747	1	ethylene-responsive transcription factor 3-like		AP2/ERF domain	TRINITY_DN2348_c2_g1	FvH4_6g42870.1	4.044	11.8755	7.8315	2.93657	0.00127664	0.233899	probable WRKY transcription factor 31 \\ 0.00E+00 \\ 80.55 % \\ GO:0003677-IEA;GO:0003700-IEA;GO:0006355-IEA;GO:0043565-IEA;GO:0005634-IEA \\ DNA binding-IEA;DNA-binding transcription factor activity-IEA;regulation of transcription, DNA-templated-IEA;sequ		WRKY domain	TRINITY_DN6944_c0_g2	FvH4_7g10070.1	0.7565	1.8135	1.057	2.39722	0.0288245	0.885713	ethylene-responsive transcription factor 2-like \\ 8.80E-22 \\ 74.99 % \\ GO:0046872-IEA \\ metal ion binding-IEA \\ GO:0046872 \\ metal ion binding		AP2/ERF domain												TRINITY_DN21633_c0_g1	FvH4_4g23840.1	1.59775	3.53325	1.9355	2.21139
TRINITY_DN113_c4_g1	FvH4_7g26920.1	5.452	35.8897	30.4378	6.58286	5.72399e-06	0.0157496	ethylene-responsive transcription factor 2-like \\ 3.40E-170 \\ 64.54 % \\ GO:0003677-IEA;GO:0003700-IEA;GO:0006351-IEA;GO:0006355-IEA;GO:0005634-IEA \\ DNA binding-IEA;DNA-binding transcription factor activity-IEA;transcription, DNA-templated-IEA;regulat	EREBP-like factor	AP2/ERF domain	TRINITY_DN34360_c0_g1	FvH4_6g10510.1	2.172	15.245	13.073	7.01888	3.49213e-06	0.0149419	probable WRKY transcription factor 33 \\ 0.00E+00 \\ 72.73 % \\ GO:0003677-IEA;GO:0003700-IEA;GO:0006355-IEA;GO:0043565-IEA;GO:0005634-IEA \\ DNA binding-IEA;DNA-binding transcription factor activity-IEA;regulation of transcription, DNA-templated-IEA;sequ	WRKY transcription factor 33	WRKY domain	TRINITY_DN6965_c0_g1	FvH4_5g08620.1	6.4195	14.6852	8.26575	2.2876	0.00118301	0.304469	probable WRKY transcription factor 43 \\ 0.00E+00 \\ 58.20 %														TRINITY_DN1087_c0_g2	FvH4_3g36720.1	7.25025	15.6067	8.3565	2.15258
TRINITY_DN3135_c1_g1	FvH4_3g39850.1	3.5755	21.5375	17.962	6.02363	0.0001702	0.0715326	WRKY transcription factor WRKY24-like isoform X1 \\ 0.00E+00 \\ 81.19 % \\ GO:0003677-IEA;GO:0003700-IEA;GO:0006355-IEA;GO:0043565-IEA;GO:0005634-IEA \\ DNA binding-IEA;DNA-binding transcription factor activity-IEA;regulation of transcription, DNA-templat	WRKY transcription factor 33	WRKY domain	TRINITY_DN2834_c0_g1	FvH4_6g28650.1	7.8545	62.7185	54.864	7.98504	0.000370571	0.12465	probable WRKY transcription factor 40 \\ 2.90E-72 \\ 87.96 % \\ GO:0003677-IEA;GO:0003700-IEA;GO:0006355-IEA;GO:0043565-IEA;GO:0005634-IEA \\ DNA binding-IEA;DNA-binding transcription factor activity-IEA;regulation of transcription, DNA-templated-IEA;sequ		WRKY domain	TRINITY_DN34360_c0_g1	FvH4_6g10510.1	2.4665	5.405	2.9385	2.19136	0.0073652	0.689363	probable WRKY transcription factor 33 \\ 0.00E+00 \\ 72.73 % \\ GO:0003677-IEA;GO:0003700-IEA;GO:0006355-IEA;GO:0043565-IEA;GO:0005634-IEA \\ DNA binding-IEA;DNA-binding transcription factor activity-IEA;regulation of transcription, DNA-templated-IEA;sequ	WRKY transcription factor 33	WRKY domain												TRINITY_DN11523_c0_g1	FvH4_5g27870.1	1.55475	3.30225	1.7475	2.12397
TRINITY_DN9945_c0_g1	FvH4_2g16180.1	3.354	19.752	16.398	5.88909	4.26913e-05	0.0333805	NAC transcription factor \\ 1.10E-67 \\ 92.41 % \\ GO:0003677-IEA;GO:0045792-IEA;GO:0006355-IEA;GO:0010200-IEA;GO:0005634-IEA;GO:0009965-IEA;GO:0048281-IEA \\ DNA binding-IEA;negative regulation of cell size-IEA;regulation of transcription, DNA-templated-		NAC domain	TRINITY_DN6423_c0_g1	FvH4_2g41070.1	0.18075	10.9378	10.757	60.5131	0.000354503	0.121731	probable WRKY transcription factor 40 \\ 3.40E-102 \\ 74.68 %		WRKY domain	TRINITY_DN113_c4_g1	FvH4_7g26920.1	5.24375	11.4067	6.163	2.1753	9.33094e-05	0.123373	ethylene-responsive transcription factor 2-like \\ 3.40E-170 \\ 64.54 % \\ GO:0003677-IEA;GO:0003700-IEA;GO:0006351-IEA;GO:0006355-IEA;GO:0005634-IEA \\ DNA binding-IEA;DNA-binding transcription factor activity-IEA;transcription, DNA-templated-IEA;regulat	EREBP-like factor	AP2/ERF domain												Total upregulated genes=	32
TRINITY_DN6189_c1_g2	FvH4_5g19840.1	22.0085	105.834	83.8255	4.80878	0.00150379	0.236606	ethylene-responsive transcription factor 2 \\ 4.50E-106 \\ 71.65 %	EREBP-like factor	AP2/ERF domain	TRINITY_DN6167_c0_g1	FvH4_2g41060.1	2.417	13.4108	10.9938	5.54851	9.46667e-05	0.0611713	probable WRKY transcription factor 40 isoform X1 \\ 0.00E+00 \\ 66.88 % \\ GO:0003677-IEA;GO:0003700-IEA;GO:0006355-IEA;GO:0043565-IEA;GO:0005634-IEA \\ DNA binding-IEA;DNA-binding transcription factor activity-IEA;regulation of transcription, DNA-templat		WRKY domain	TRINITY_DN9942_c0_g1	FvH4_1g16030.1	46.7818	100.309	53.5277	2.1442	0.00304626	0.454716	heat shock factor protein HSF24 \\ 5.90E-122 \\ 78.26 % \\ GO:0003677-IEA;GO:0003700-IEA;GO:0006355-IEA;GO:0043565-IEA;GO:0005634-IEA \\ DNA binding-IEA;DNA-binding transcription factor activity-IEA;regulation of transcription, DNA-templated-IEA;sequence-	heat shock transcription factor, other eukaryote	Heat shock factor (HSF)-type, DNA-binding
TRINITY_DN4036_c0_g2	FvH4_7g26030.1	9.328	41.9997	32.6718	4.50255	7.87081e-05	0.0471883	probable WRKY transcription factor 70 \\ 0.00E+00 \\ 96.19 % \\ GO:0008270-IEA;GO:0016491-IEA;GO:0046872-IEA;GO:0055114-IEA;GO:0008643-IEA \\ zinc ion binding-IEA;oxidoreductase activity-IEA;metal ion binding-IEA;oxidation-reduction process-IEA;carbohydra		WRKY domain	TRINITY_DN3537_c0_g1	FvH4_7g16150.1	7.9585	139.386	131.428	17.5141	9.04077e-07	0.00925697	probable WRKY transcription factor 46 \\ 1.10E-124 \\ 80.90 % \\ GO:0003677-IEA;GO:0003700-IEA;GO:0006355-IEA;GO:0043565-IEA;GO:0005634-IEA \\ DNA binding-IEA;DNA-binding transcription factor activity-IEA;regulation of transcription, DNA-templated-IEA;seq		WRKY domain	TRINITY_DN3631_c0_g1	FvH4_5g33810.1	21.0307	43.8457	22.815	2.08484	0.0005062	0.215757	transcription factor bHLH93-like \\ 1.20E-159 \\ 68.25 % \\ GO:0046983-IEA \\ protein dimerization activity-IEA \\ GO:0046983 \\ protein dimerization activity		Myc-type, basic helix-loop-helix (bHLH) domain												Downregulated genes
TRINITY_DN77170_c0_g2	FvH4_5g09520.1	0.88825	3.96625	3.078	4.46524	5.09843e-05	0.0372375	ethylene-responsive transcription factor ERF114-like \\ 1.40E-149 \\ 88.82 % \\ GO:0003677-IEA;GO:0003700-IEA;GO:0006351-IEA;GO:0046983-IEA;GO:0006355-IEA;GO:0000977-IEA;GO:0005634-IEA;GO:0045944-IEA \\ DNA binding-IEA;DNA-binding transcription factor act		AP2/ERF domain	TRINITY_DN2837_c0_g2	FvH4_1g22820.1	1.99525	20.6208	18.6255	10.3349	8.48109e-06	0.0206186	probable WRKY transcription factor 51 \\ 5.70E-44 \\ 86.10 % \\ GO:0000166-IEA;GO:0048544-IEA;GO:0016020-IEA;GO:0016021-IEA;GO:0016310-IEA;GO:0016740-IEA;GO:0004672-IEA;GO:0016301-IEA;GO:0004674-IEA;GO:0005524-IEA;GO:0006468-IEA \\ nucleotide binding-IEA;		WRKY domain	TRINITY_DN22388_c0_g1	FvH4_2g21500.1	4.84325	10.0675	5.22425	2.07867	0.00231168	0.406483	myb-related protein Myb4 \\ 9.00E-105 \\ 90.27 % \\ GO:0003677-IEA;GO:0016020-IEA;GO:0016021-IEA \\ DNA binding-IEA;membrane-IEA;integral component of membrane-IEA \\ GO:0003677 \\ DNA binding	transcription factor MYB, plant	SANT/Myb domain												TRINITY_DN2469_c0_g1	FvH4_3g34960.1	11.2122	2.633	-8.57925	-4.25836
TRINITY_DN8438_c0_g1	FvH4_2g35010.1	1.7215	7.399	5.6775	4.298	0.00939617	0.63438	transcription factor MYB44-like \\ 0.00E+00 \\ 86.82 % \\ GO:0000166-IEA;GO:0046872-IEA;GO:0120029-IEA;GO:0016020-IEA;GO:0016021-IEA;GO:0008553-IEA;GO:0006811-IEA;GO:0005524-IEA;GO:0016787-IEA;GO:0005886-IEA \\ nucleotide binding-IEA;metal ion binding-IEA		SANT/Myb domain	TRINITY_DN3081_c0_g1	FvH4_5g04370.1	1.5395	3.5275	1.988	2.29133	0.000992994	0.203941	probable WRKY transcription factor 53 \\ 3.00E-119 \\ 86.31 % \\ GO:0003677-IEA;GO:0003700-IEA;GO:0016020-IEA;GO:0016021-IEA;GO:0006355-IEA;GO:0043565-IEA;GO:0005634-IEA \\ DNA binding-IEA;DNA-binding transcription factor activity-IEA;membrane-IEA;integra		WRKY domain	TRINITY_DN3462_c1_g1	FvH4_4g13230.1	3.91175	8.09775	4.186	2.07011	0.000307698	0.179984	heat stress transcription factor A-5 \\ 0.00E+00 \\ 84.95 % \\ GO:0003677-IEA;GO:0003700-IEA;GO:0006355-IEA;GO:0043565-IEA;GO:0005634-IEA \\ DNA binding-IEA;DNA-binding transcription factor activity-IEA;regulation of transcription, DNA-templated-IEA;seque	heat shock transcription factor, other eukaryote	Heat shock factor (HSF)-type, DNA-binding												TRINITY_DN5024_c3_g1	FvH4_3g03780.1	1.9925	0.50975	-1.48275	-3.90878
TRINITY_DN1526_c0_g1	FvH4_5g03210.1	0.50025	2.12575	1.6255	4.24938	0.000897123	0.176261	probable WRKY transcription factor 29 isoform X1 \\ 2.50E-15 \\ 89.14 % \\ GO:0003700-IEA;GO:0006355-IEA \\ DNA-binding transcription factor activity-IEA;regulation of transcription, DNA-templated-IEA \\ GO:0003700;GO:0006355 \\ DNA-binding transcription		WRKY domain	TRINITY_DN4036_c0_g2	FvH4_7g26030.1	12.0503	41.9997	29.9495	3.48538	0.000131647	0.0725405	probable WRKY transcription factor 70 \\ 0.00E+00 \\ 96.19 % \\ GO:0008270-IEA;GO:0016491-IEA;GO:0046872-IEA;GO:0055114-IEA;GO:0008643-IEA \\ zinc ion binding-IEA;oxidoreductase activity-IEA;metal ion binding-IEA;oxidation-reduction process-IEA;carbohydra		WRKY domain	TRINITY_DN378_c1_g1	FvH4_5g36240.1	6.68025	13.7775	7.09725	2.06242	0.00573782	0.609115	transcription factor bHLH96 \\ 0.00E+00 \\ 70.40 % \\ GO:0046983-IEA \\ protein dimerization activity-IEA \\ GO:0046983 \\ protein dimerization activity		Myc-type, basic helix-loop-helix (bHLH) domain												TRINITY_DN530_c0_g1	FvH4_1g04810.1	5.51375	1.4125	-4.10125	-3.90354
TRINITY_DN2348_c2_g1	FvH4_6g42870.1	3.4535	11.8755	8.422	3.43869	0.000749168	0.160558	probable WRKY transcription factor 31 \\ 0.00E+00 \\ 80.55 % \\ GO:0003677-IEA;GO:0003700-IEA;GO:0006355-IEA;GO:0043565-IEA;GO:0005634-IEA \\ DNA binding-IEA;DNA-binding transcription factor activity-IEA;regulation of transcription, DNA-templated-IEA;sequ		WRKY domain	TRINITY_DN12946_c0_g1	FvH4_6g53770.1	3.10075	19.927	16.8262	6.42651	5.1788e-05	0.0473422	probable WRKY transcription factor 75 \\ 2.00E-51 \\ 93.84 % \\ GO:0003677-IEA;GO:0003700-IEA;GO:0006355-IEA;GO:0043565-IEA;GO:0005634-IEA \\ DNA binding-IEA;DNA-binding transcription factor activity-IEA;regulation of transcription, DNA-templated-IEA;sequ		WRKY domain	TRINITY_DN3179_c2_g1	FvH4_2g17760.1	11.264	23.0778	11.8138	2.04881	0.00056271	0.224884	transcription factor IBH1-like \\ 4.80E-137 \\ 65.93 % \\ GO:0000166-IEA;GO:0005525-IEA;GO:0007165-IEA;GO:0003924-IEA;GO:0019001-IEA;GO:0007186-IEA;GO:0031683-IEA \\ nucleotide binding-IEA;GTP binding-IEA;signal transduction-IEA;GTPase activity-IEA;guanyl		Helix-loop-helix DNA-binding domain superfamily												TRINITY_DN21005_c2_g1	FvH4_1g20680.1	2.692	0.7045	-1.9875	-3.82115
TRINITY_DN3067_c0_g1	FvH4_5g10410.1	0.3585	1.23075	0.87225	3.43305	0.00583566	0.484652	B3 domain-containing transcription factor NGA1-like \\ 0.00E+00 \\ 66.27 % \\ GO:0003677-IEA;GO:0006351-IEA;GO:0006355-IEA;GO:0005634-IEA \\ DNA binding-IEA;transcription, DNA-templated-IEA;regulation of transcription, DNA-templated-IEA;nucleus-IEA \\ GO:		B3 DNA binding domain	TRINITY_DN6051_c0_g1	FvH4_4g23480.1	5.35625	67.4045	62.0482	12.5843	5.84273e-06	0.0175255	probable WRKY transcription factor 75 \\ 3.40E-57 \\ 96.31 % \\ GO:0003677-IEA;GO:0003700-IEA;GO:0006355-IEA;GO:0043565-IEA;GO:0005634-IEA \\ DNA binding-IEA;DNA-binding transcription factor activity-IEA;regulation of transcription, DNA-templated-IEA;sequ		WRKY domain	TRINITY_DN12257_c0_g1	FvH4_7g06630.1	0.825	1.67675	0.85175	2.03242	0.00827887	0.72954	transcription factor DIVARICATA \\ 3.50E-67 \\ 75.10 % \\ GO:0003677-IEA;GO:0005634-IEA \\ DNA binding-IEA;nucleus-IEA \\ GO:0003677;GO:0005634 \\ DNA binding;nucleus		SANT/Myb domain												TRINITY_DN6605_c0_g1	FvH4_7g01120.1	1.523	0.441	-1.082	-3.45351
TRINITY_DN1308_c0_g2	FvH4_4g28030.1	4.6185	15.7032	11.0847	3.40008	0.00656876	0.517407	AP2/ERF and B3 domain-containing transcription factor RAV1 \\ 1.00E-102 \\ 87.43 % \\ GO:0016874-IEA;GO:0009536-IEA \\ ligase activity-IEA;plastid-IEA \\ GO:0009536;GO:0016874 \\ plastid;ligase activity	RAV-like factor	AP2/ERF domain	TRINITY_DN2213_c0_g2	FvH4_1g07710.1	0.03325	2.521	2.48775	75.8195	4.58872e-05	0.0441462	putative transcription factor bHLH041 isoform X1 \\ 0.00E+00 \\ 76.14 % \\ GO:0046983-IEA;GO:0016020-IEA;GO:0016021-IEA \\ protein dimerization activity-IEA;membrane-IEA;integral component of membrane-IEA \\ GO:0016020;GO:0046983 \\ membrane;protein dimer		Myc-type, basic helix-loop-helix (bHLH) domain	TRINITY_DN9788_c1_g1	FvH4_3g08790.1	1.594	3.21375	1.61975	2.01615	0.00260194	0.427965	ethylene-responsive transcription factor 12 \\ 2.10E-105 \\ 75.05 % \\ GO:0003677-IEA;GO:0003700-IEA;GO:0006351-IEA;GO:0006355-IEA;GO:0005634-IEA \\ DNA binding-IEA;DNA-binding transcription factor activity-IEA;transcription, DNA-templated-IEA;regulation		AP2/ERF domain												TRINITY_DN3702_c1_g1	FvH4_2g31100.1	9.96175	3.354	-6.60775	-2.97011
TRINITY_DN1376_c0_g3	FvH4_1g18500.1	1.54	5.2225	3.6825	3.39123	0.000620462	0.146871	transcription factor RAX3-like \\ 0.00E+00 \\ 73.10 % \\ GO:0003677-IEA;GO:0044212-IBA;GO:0030154-IBA;GO:0043565-IBA;GO:0005634-IBA \\ DNA binding-IEA;transcription regulatory region DNA binding-IBA;cell differentiation-IBA;sequence-specific DNA binding-I	transcription factor MYB, plant	SANT/Myb domain	TRINITY_DN510_c1_g1	FvH4_2g33720.1	0.46425	6.0185	5.55425	12.9639	0.000122453	0.0702052	putative transcription factor MYC/MYB \\ 0.00E+00 \\ 84.72 %		Transcription factor MYC/MYB N-terminal	Total upregulated genes=	41																					TRINITY_DN4664_c0_g5	FvH4_4g23530.1	1.71525	0.617	-1.09825	-2.77998
TRINITY_DN3462_c1_g1	FvH4_4g13230.1	5.13925	15.638	10.4988	3.04286	6.42567e-06	0.016275	heat stress transcription factor A-5 \\ 0.00E+00 \\ 84.95 % \\ GO:0003677-IEA;GO:0003700-IEA;GO:0006355-IEA;GO:0043565-IEA;GO:0005634-IEA \\ DNA binding-IEA;DNA-binding transcription factor activity-IEA;regulation of transcription, DNA-templated-IEA;seque	heat shock transcription factor, other eukaryote	Heat shock factor (HSF)-type, DNA-binding	TRINITY_DN7613_c0_g1	FvH4_1g26490.1	5.4835	72.6397	67.1562	13.247	0.014645	0.842362	putative transcription factor WD40-like family \\ 0.00E+00 \\ 84.75 % \\ GO:0008233-IEA;GO:0006508-IEA \\ peptidase activity-IEA;proteolysis-IEA \\ GO:0006508;GO:0008233 \\ proteolysis;peptidase activity		WD40-like Beta Propeller																							TRINITY_DN16224_c0_g1	FvH4_1g18750.1	1.92725	0.71475	-1.2125	-2.6964
TRINITY_DN4060_c0_g1	FvH4_5g39130.1	15.8942	46.6232	30.729	2.93334	0.00855422	0.600028	putative transcription factor WD40-like family \\ 1.50E-114 \\ 89.54 % \\ GO:0016020-IEA;GO:0016021-IEA;GO:0005783-IBA \\ membrane-IEA;integral component of membrane-IEA;endoplasmic reticulum-IBA \\ GO:0005783;GO:0016021 \\ endoplasmic reticulum;integral		WD40/YVTN repeat-like-containing domain superfamily	TRINITY_DN4060_c0_g1	FvH4_5g39130.1	14.35	46.6232	32.2732	3.24901	0.00668779	0.556299	putative transcription factor WD40-like family \\ 1.50E-114 \\ 89.54 % \\ GO:0016020-IEA;GO:0016021-IEA;GO:0005783-IBA \\ membrane-IEA;integral component of membrane-IEA;endoplasmic reticulum-IBA \\ GO:0005783;GO:0016021 \\ endoplasmic reticulum;integral		WD40/YVTN repeat-like-containing domain superfamily	Downregulated genes																						TRINITY_DN16625_c0_g1	FvH4_5g09300.1	4.20125	1.57975	-2.6215	-2.65944
TRINITY_DN6321_c0_g1	FvH4_6g02270.1	1.198	3.402	2.204	2.83973	0.00254386	0.312849	ethylene-responsive transcription factor 1B-like \\ 1.70E-11 \\ 54.73 % \\ GO:0003964-IEA;GO:0016779-IEA;GO:0008270-IEA;GO:0090502-IEA;GO:0005739-IEA;GO:0006278-IEA;GO:0016740-IEA;GO:0004523-IEA;GO:0003676-IEA \\ RNA-directed DNA polymerase activity-IEA;n	ethylene-responsive transcription factor 1	AP2/ERF domain	TRINITY_DN2695_c1_g5	FvH4_6g26360.1	1.46575	6.62825	5.1625	4.52209	0.00201648	0.295536	transcription factor bHLH162-like \\ 2.40E-98 \\ 92.10 % \\ GO:0045893-IBA;GO:0005634-IBA \\ positive regulation of transcription, DNA-templated-IBA;nucleus-IBA \\ GO:0005634;GO:0045893 \\ nucleus;positive regulation of transcription, DNA-templated		Myc-type, basic helix-loop-helix (bHLH) domain	TRINITY_DN5024_c3_g1	FvH4_3g03780.1	2.346	0.27475	-2.07125	-8.53867	5.87507e-06	0.0393463	protein ODORANT1-like \\ 0.00E+00 \\ 87.57 % \\ GO:0003824-IEA;GO:0008265-IEA;GO:0016020-IEA;GO:0102867-IEA;GO:0016021-IEA;GO:0016740-IEA \\ catalytic activity-IEA;Mo-molybdopterin cofactor sulfurase activity-IEA;membrane-IEA;molybdenum cofactor sulfurtra	transcription factor MYB, plant	SANT/Myb domain												TRINITY_DN7140_c0_g1	FvH4_5g05280.1	2.6055	1.03325	-1.57225	-2.52165
TRINITY_DN2695_c1_g5	FvH4_6g26360.1	2.40225	6.62825	4.226	2.75918	0.00752514	0.558966	transcription factor bHLH162-like \\ 2.40E-98 \\ 92.10 % \\ GO:0045893-IBA;GO:0005634-IBA \\ positive regulation of transcription, DNA-templated-IBA;nucleus-IBA \\ GO:0005634;GO:0045893 \\ nucleus;positive regulation of transcription, DNA-templated		Myc-type, basic helix-loop-helix (bHLH) domain	TRINITY_DN35309_c0_g3	FvH4_5g05180.1	0.17275	4.512	4.33925	26.1187	4.76383e-05	0.0445998	transcription factor bHLH162-like \\ 6.10E-113 \\ 56.26 % \\ GO:0003677-IEA;GO:0006355-IEA \\ DNA binding-IEA;regulation of transcription, DNA-templated-IEA		Myc-type, basic helix-loop-helix (bHLH) domain	TRINITY_DN2469_c0_g1	FvH4_3g34960.1	18.2213	2.538	-15.6833	-7.17937	0.000270252	0.17309	transcription factor MYB59 \\ 0.00E+00 \\ 78.28 % \\ GO:0000165-IEA;GO:0004713-IEA;GO:0000186-IEA;GO:0016020-IEA;GO:0016021-IEA;GO:0004709-IEA;GO:0016310-IEA;GO:0016740-IEA;GO:0016301-IEA;GO:0016787-IEA;GO:0018108-IEA;GO:0007165-IEA;GO:0043531-IEA;GO:0004	transcription factor MYB, plant	SANT/Myb domain												TRINITY_DN264_c2_g1	FvH4_6g37880.1	3.2475	1.31925	-1.92825	-2.46163
TRINITY_DN3081_c0_g1	FvH4_5g04370.1	1.321	3.5275	2.2065	2.67033	0.000734147	0.158826	probable WRKY transcription factor 53 \\ 3.00E-119 \\ 86.31 % \\ GO:0003677-IEA;GO:0003700-IEA;GO:0016020-IEA;GO:0016021-IEA;GO:0006355-IEA;GO:0043565-IEA;GO:0005634-IEA \\ DNA binding-IEA;DNA-binding transcription factor activity-IEA;membrane-IEA;integra		WRKY domain	TRINITY_DN1699_c3_g1	FvH4_4g07090.1	3.12675	8.4615	5.33475	2.70616	0.0102869	0.698806	transcription factor bHLH35 \\ 1.60E-133 \\ 90.38 % \\ GO:0046983-IEA \\ protein dimerization activity-IEA \\ GO:0046983 \\ protein dimerization activity		Myc-type, basic helix-loop-helix (bHLH) domain	TRINITY_DN203567_c0_g1	FvH4_6g46420.1	1.04125	0.17975	-0.8615	-5.79277	0.0320115	0.885713	developmental protein SEPALLATA 1 isoform X1 \\ 0.00E+00 \\ 60.83 %	MADS-box transcription factor, plant	Transcription factor, MADS-box												TRINITY_DN10730_c0_g1	FvH4_2g29440.1	3.22925	1.36125	-1.868	-2.37227
TRINITY_DN6692_c0_g1	FvH4_5g39200.1	30.8635	81.1775	50.314	2.63021	0.000150446	0.066117	bZIP transcription factor 53-like \\ 0.00E+00 \\ 72.37 % \\ GO:0051213-IEA;GO:0046872-IEA;GO:0016491-IEA;GO:0016707-IEA;GO:0055114-IEA \\ dioxygenase activity-IEA;metal ion binding-IEA;oxidoreductase activity-IEA;gibberellin 3-beta-dioxygenase activity-IE		Basic-leucine zipper domain	TRINITY_DN172294_c0_g1	FvH4_4g02610.1	0.0715	1.6025	1.531	22.4126	0.0235	1	transcription factor bHLH92 \\ 4.90E-131 \\ 82.40 % \\ GO:0016192-IEA;GO:0016020-IEA;GO:0016021-IEA;GO:0005622-IEA;GO:0006886-IEA \\ vesicle-mediated transport-IEA;membrane-IEA;integral component of membrane-IEA;intracellular-IEA;intracellular protein tra		Myc-type, basic helix-loop-helix (bHLH) domain	TRINITY_DN2054_c0_g1	FvH4_6g09750.1	1.044	0.19625	-0.84775	-5.31975	0.00342546	0.48029	probable WRKY transcription factor 70 \\ 0.00E+00 \\ 96.02 % \\ GO:0005515-IPI;GO:0043065-IEA;GO:0043065-IGI;GO:0005739-IEA;GO:0005739-IDA;GO:0016020-IEA;GO:0016021-IEA;GO:0015867-IEA;GO:0015866-IEA;GO:0055085-IEA;GO:0005471-IBA;GO:0008340-IEA;GO:0008340-		WRKY domain												TRINITY_DN484_c0_g1	FvH4_5g32090.1	2.592	1.09675	-1.49525	-2.36335
TRINITY_DN9942_c0_g1	FvH4_1g16030.1	33.286	86.6873	53.4013	2.60432	0.004837	0.440367	heat shock factor protein HSF24 \\ 5.90E-122 \\ 78.26 % \\ GO:0003677-IEA;GO:0003700-IEA;GO:0006355-IEA;GO:0043565-IEA;GO:0005634-IEA \\ DNA binding-IEA;DNA-binding transcription factor activity-IEA;regulation of transcription, DNA-templated-IEA;sequence-	heat shock transcription factor, other eukaryote	Heat shock factor (HSF)-type, DNA-binding	TRINITY_DN3202_c0_g1	FvH4_4g20750.1	1.016	2.35275	1.33675	2.3157	0.00109059	0.213866	transcription factor MYB108 \\ 1.40E-166 \\ 68.65 % \\ GO:0003677-IEA;GO:0043565-IBA;GO:0005634-IBA \\ DNA binding-IEA;sequence-specific DNA binding-IBA;nucleus-IBA \\ GO:0003677 \\ DNA binding	transcription factor MYB, plant	SANT/Myb domain	TRINITY_DN2687_c0_g1	FvH4_5g11430.1	1.14575	0.22075	-0.925	-5.19026	0.00447495	0.536719	myb-related protein 308-like \\ 9.90E-39 \\ 85.34 % \\ GO:0000166-IEA;GO:0048544-IEA;GO:0016020-IEA;GO:0016021-IEA;GO:0016310-IEA;GO:0016740-IEA;GO:0004672-IEA;GO:0016301-IEA;GO:0004674-IEA;GO:0005524-IEA;GO:0006468-IEA \\ nucleotide binding-IEA;recogniti	transcription factor MYB, plant	SANT/Myb domain												TRINITY_DN23155_c0_g1	FvH4_5g32850.1	3.57275	1.5845	-1.98825	-2.25481
TRINITY_DN9839_c0_g1	FvH4_3g01700.1	10.0243	24.5953	14.571	2.45358	0.000385118	0.114204	probable WRKY transcription factor 31 \\ 0.00E+00 \\ 78.32 % \\ GO:0003677-IEA;GO:0003700-IEA;GO:0006355-IEA;GO:0043565-IEA;GO:0005634-IEA \\ DNA binding-IEA;DNA-binding transcription factor activity-IEA;regulation of transcription, DNA-templated-IEA;sequ		WRKY domain	TRINITY_DN3017_c0_g1	FvH4_5g11930.1	2.73425	57.8032	55.069	21.1404	2.16651e-05	0.0317827	transcription factor MYB108-like \\ 6.10E-118 \\ 63.74 % \\ GO:0004869-IEA;GO:0030414-IEA;GO:0010951-IEA;GO:0010466-IEA \\ cysteine-type endopeptidase inhibitor activity-IEA;peptidase inhibitor activity-IEA;negative regulation of endopeptidase activity-IE	transcription factor MYB, plant	SANT/Myb domain	TRINITY_DN21005_c2_g1	FvH4_1g20680.1	2.4375	0.59275	-1.84475	-4.11219	0.00155208	0.334488	transcription factor MYB39-like \\ 0.00E+00 \\ 75.82 % \\ GO:0016746-IEA;GO:0016747-IEA;GO:0016740-IEA;GO:0047172-IEA \\ transferase activity, transferring acyl groups-IEA;transferase activity, transferring acyl groups other than amino-acyl groups-IEA;tra	transcription factor MYB, plant	SANT/Myb domain												TRINITY_DN231_c4_g1	FvH4_2g02340.1	4.49675	2.05175	-2.445	-2.19167
TRINITY_DN5894_c0_g1	FvH4_4g22650.1	5.51825	12.9682	7.45	2.35007	0.000308195	0.0997329	ethylene-responsive transcription factor ERF113 \\ 2.10E-63 \\ 69.39 % \\ GO:0003677-IEA;GO:0003700-IEA;GO:0045893-IEA;GO:0071497-IEA;GO:0019760-IEA;GO:0006351-IEA;GO:0009751-IEA;GO:0009651-IEA;GO:0006355-IEA;GO:0009414-IEA;GO:0009753-IEA;GO:0043565-IEA;G		AP2/ERF domain	TRINITY_DN8438_c0_g1	FvH4_2g35010.1	2.195	7.399	5.204	3.37084	0.0168041	0.901514	transcription factor MYB44-like \\ 0.00E+00 \\ 86.82 % \\ GO:0000166-IEA;GO:0046872-IEA;GO:0120029-IEA;GO:0016020-IEA;GO:0016021-IEA;GO:0008553-IEA;GO:0006811-IEA;GO:0005524-IEA;GO:0016787-IEA;GO:0005886-IEA \\ nucleotide binding-IEA;metal ion binding-IEA		SANT/Myb domain	TRINITY_DN1237_c0_g3	FvH4_5g06910.1	11.7747	2.90125	-8.8735	-4.05851	0.0375385	0.885713	putative transcription factor C2H2 family \\ 0.00E+00 \\ 95.76 % \\ GO:0008168-IEA;GO:0016740-IEA;GO:0032259-IEA \\ methyltransferase activity-IEA;transferase activity-IEA;methylation-IEA \\ GO:0008168;GO:0032259 \\ methyltransferase activity;methylation		Zinc finger, RING-type												TRINITY_DN1254_c0_g1	FvH4_5g08520.1	56.5938	26.316	-30.2778	-2.15055
TRINITY_DN6965_c0_g1	FvH4_5g08620.1	6.059	14.0325	7.9735	2.31598	5.34565e-05	0.0380331	probable WRKY transcription factor 43 \\ 0.00E+00 \\ 58.20 %			TRINITY_DN8530_c0_g1	FvH4_3g15320.1	1.95475	5.73175	3.777	2.93222	0.000652114	0.161753	transcription factor MYB63 \\ 0.00E+00 \\ 61.65 % \\ GO:0003677-IEA;GO:0030154-IBA;GO:0044212-IBA;GO:0043565-IBA;GO:0005634-IBA \\ DNA binding-IEA;cell differentiation-IBA;transcription regulatory region DNA binding-IBA;sequence-specific DNA binding-IBA;n	transcription factor MYB, plant	SANT/Myb domain	TRINITY_DN3702_c1_g1	FvH4_2g31100.1	10.9578	2.772	-8.18575	-3.95301	6.76934e-05	0.107658	myb-related protein 308-like \\ 9.20E-142 \\ 65.28 % \\ GO:0003677-IEA \\ DNA binding-IEA \\ GO:0003677 \\ DNA binding	transcription factor MYB, plant	SANT/Myb domain												TRINITY_DN10221_c1_g2	FvH4_7g28100.1	1.78075	0.834	-0.94675	-2.13519
TRINITY_DN11414_c0_g2	FvH4_7g03530.1	8.565	19.8083	11.2432	2.3127	0.000127963	0.0602774	transcription factor TGA2-like \\ 9.50E-125 \\ 97.94 % \\ GO:0003700-IEA;GO:0006351-IEA;GO:0006355-IEA;GO:0043565-IEA \\ DNA-binding transcription factor activity-IEA;transcription, DNA-templated-IEA;regulation of transcription, DNA-templated-IEA;sequence	transcription factor TGA	Basic-leucine zipper domain	TRINITY_DN14173_c0_g1	FvH4_5g10850.1	0.79475	6.7965	6.00175	8.55175	0.0201863	1	transcription factor MYC2-like \\ 0.00E+00 \\ 73.19 % \\ GO:0046983-IEA \\ protein dimerization activity-IEA \\ GO:0046983 \\ protein dimerization activity		Myc-type, basic helix-loop-helix (bHLH) domain	TRINITY_DN530_c0_g1	FvH4_1g04810.1	5.48325	1.443	-4.04025	-3.7999	0.00315721	0.461186	heat stress transcription factor C-1 \\ 2.80E-156 \\ 74.51 % \\ GO:0008152-IEA;GO:0003824-IEA;GO:0016052-IEA;GO:0008496-IEA;GO:0016020-IEA;GO:0016021-IEA;GO:0016798-IEA;GO:0016787-IEA \\ metabolic process-IEA;catalytic activity-IEA;carbohydrate catabolic	heat shock transcription factor, other eukaryote	Heat shock factor (HSF)-type, DNA-binding												TRINITY_DN5560_c0_g1	FvH4_6g44350.1	2.12675	1.0225	-1.10425	-2.07995
TRINITY_DN534_c0_g1	FvH4_2g10220.1	8.76425	19.404	10.6397	2.21399	5.75309e-05	0.0400985	GATA transcription factor 5-like \\ 0.00E+00 \\ 62.77 % \\ GO:0003677-IEA;GO:0003700-IEA;GO:0008270-IEA;GO:0046872-IEA;GO:0045893-IEA;GO:0006355-IEA;GO:0043565-IEA;GO:0005634-IEA \\ DNA binding-IEA;DNA-binding transcription factor activity-IEA;zinc ion bi		Zinc finger, GATA-type	TRINITY_DN1376_c0_g3	FvH4_1g18500.1	2.223	5.2225	2.9995	2.3493	0.00173425	0.273178	transcription factor RAX3-like \\ 0.00E+00 \\ 73.10 % \\ GO:0003677-IEA;GO:0044212-IBA;GO:0030154-IBA;GO:0043565-IBA;GO:0005634-IBA \\ DNA binding-IEA;transcription regulatory region DNA binding-IBA;cell differentiation-IBA;sequence-specific DNA binding-I	transcription factor MYB, plant	SANT/Myb domain	TRINITY_DN26018_c0_g1	FvH4_1g09520.1	1.5065	0.421	-1.0855	-3.57838	0.0165131	0.885713	transcription factor bHLH112 \\ 3.30E-58 \\ 69.07 % \\ GO:0000166-IEA;GO:0043066-IEA;GO:0005509-IEA;GO:0016310-IEA;GO:0016740-IEA;GO:0016301-IEA;GO:0030010-IEA;GO:0004691-IEA;GO:0006355-IEA;GO:0004672-IEA;GO:0000226-IEA;GO:0004674-IEA;GO:0005524-IEA;GO:00		Myc-type, basic helix-loop-helix (bHLH) domain												TRINITY_DN1771_c0_g2	FvH4_2g37040.1	1.1865	0.5725	-0.614	-2.07249
TRINITY_DN11523_c0_g1	FvH4_5g27870.1	1.316	2.874	1.558	2.18389	0.00498817	0.448281	myb-like protein A \\ 0.00E+00 \\ 77.75 % \\ GO:0003677-IEA \\ DNA binding-IEA \\ GO:0003677 \\ DNA binding	transcription factor MYB, plant	SANT/Myb domain	TRINITY_DN5182_c0_g1	FvH4_7g12810.1	0.9735	2.61975	1.64625	2.69106	0.0343144	1	transcription factor TCP9 \\ 2.80E-160 \\ 73.74 % \\ GO:0003677-IEA;GO:0008361-IEA;GO:0048364-IEA;GO:0006351-IEA;GO:1900056-IEA;GO:0006355-IEA;GO:0005634-IEA \\ DNA binding-IEA;regulation of cell size-IEA;root development-IEA;transcription, DNA-templated-		Transcription factor, TCP	TRINITY_DN1771_c0_g2	FvH4_2g37040.1	1.5605	0.447	-1.1135	-3.49105	0.00155294	0.334488	probable WRKY transcription factor protein 1 isoform X1 \\ 0.00E+00 \\ 76.63 %		WD40/YVTN repeat-like-containing domain superfamily												TRINITY_DN5225_c0_g2	FvH4_3g10080.1	20.3608	9.89	-10.4708	-2.05872
TRINITY_DN921_c2_g2	FvH4_3g07360.1	2.16375	4.5555	2.39175	2.10537	0.0363569	1	probable WRKY transcription factor 65 \\ 0.00E+00 \\ 85.86 % \\ GO:0009630-IEA;GO:2000012-IEA \\ gravitropism-IEA;regulation of auxin polar transport-IEA \\ GO:0009630;GO:2000012 \\ gravitropism;regulation of auxin polar transport		WRKY domain	TRINITY_DN3135_c1_g1	FvH4_3g39850.1	4.98625	21.5375	16.5513	4.31938	0.000248143	0.101791	WRKY transcription factor WRKY24-like isoform X1 \\ 0.00E+00 \\ 81.19 % \\ GO:0003677-IEA;GO:0003700-IEA;GO:0006355-IEA;GO:0043565-IEA;GO:0005634-IEA \\ DNA binding-IEA;DNA-binding transcription factor activity-IEA;regulation of transcription, DNA-templat	WRKY transcription factor 33	WRKY domain	TRINITY_DN231_c4_g1	FvH4_2g02340.1	4.2425	1.24925	-2.99325	-3.39604	0.000289731	0.176703	transcription factor bHLH18-like \\ 0.00E+00 \\ 74.64 % \\ GO:0003677-IEA;GO:0046983-IEA;GO:0016020-IEA;GO:0016021-IEA \\ DNA binding-IEA;protein dimerization activity-IEA;membrane-IEA;integral component of membrane-IEA \\ GO:0046983 \\ protein dimerizati		Myc-type, basic helix-loop-helix (bHLH) domain												TRINITY_DN10540_c0_g1	FvH4_7g05970.1	1.91775	0.9325	-0.98525	-2.05657
TRINITY_DN1699_c3_g1	FvH4_4g07090.1	4.076	8.4615	4.3855	2.07593	0.0327991	1	transcription factor bHLH35 \\ 1.60E-133 \\ 90.38 % \\ GO:0046983-IEA \\ protein dimerization activity-IEA \\ GO:0046983 \\ protein dimerization activity		Myc-type, basic helix-loop-helix (bHLH) domain	TRINITY_DN24013_c0_g1	FvH4_6g44340.1	0.08825	2.044	1.95575	23.1615	0.000380965	0.126606	myb-related protein Myb4-like \\ 2.20E-150 \\ 80.78 % \\ GO:0043531-IEA;GO:0016787-IEA \\ ADP binding-IEA;hydrolase activity-IEA \\ GO:0016787;GO:0043531 \\ hydrolase activity;ADP binding	transcription factor MYB, plant	SANT/Myb domain	TRINITY_DN6605_c0_g1	FvH4_7g01120.1	1.951	0.62475	-1.32625	-3.12285	0.000382695	0.198256	nuclear transcription factor Y subunit A-4-like \\ 1.60E-153 \\ 81.67 % \\ GO:0016602-IEA;GO:0003677-IEA;GO:0003700-IEA;GO:0006355-IEA \\ CCAAT-binding factor complex-IEA;DNA binding-IEA;DNA-binding transcription factor activity-IEA;regulation of transcri	nuclear transcription factor Y, alpha	Nuclear transcription factor Y subunit A												TRINITY_DN2630_c2_g4	FvH4_3g03630.1	3.40825	1.66575	-1.7425	-2.04608
TRINITY_DN2322_c0_g1	FvH4_1g16480.1	6.16025	12.575	6.41475	2.04131	0.00191625	0.270323	probable WRKY transcription factor 15 \\ 2.50E-137 \\ 74.46 % \\ GO:0003677-IEA;GO:0003700-IEA;GO:0006355-IEA;GO:0043565-IEA;GO:0005634-IEA \\ DNA binding-IEA;DNA-binding transcription factor activity-IEA;regulation of transcription, DNA-templated-IEA;seq		WRKY domain	TRINITY_DN22388_c0_g1	FvH4_2g21500.1	6.63425	17.1562	10.522	2.58601	0.00110984	0.216246	myb-related protein Myb4 \\ 9.00E-105 \\ 90.27 % \\ GO:0003677-IEA;GO:0016020-IEA;GO:0016021-IEA \\ DNA binding-IEA;membrane-IEA;integral component of membrane-IEA \\ GO:0003677 \\ DNA binding	transcription factor MYB, plant	SANT/Myb domain	TRINITY_DN16224_c0_g1	FvH4_1g18750.1	2.94575	1.004	-1.94175	-2.93401	0.0178627	0.885713	transcription factor bHLH18-like \\ 1.40E-136 \\ 91.62 % \\ GO:0009826-IEA;GO:0005618-IEA;GO:0080022-IEA;GO:0016020-IEA;GO:0016021-IEA;GO:0071555-IEA;GO:0009664-IEA;GO:0005576-IEA \\ unidimensional cell growth-IEA;cell wall-IEA;primary root development-IE		Myc-type, basic helix-loop-helix (bHLH) domain												TRINITY_DN9267_c1_g4	FvH4_5g35460.1	2.0775	1.032	-1.0455	-2.01308
TRINITY_DN8508_c0_g1	FvH4_6g27900.1	3.66625	7.41225	3.746	2.02175	0.0172062	0.881015	heat stress transcription factor A-4c-like \\ 0.00E+00 \\ 83.02 % \\ GO:0003677-IEA;GO:0003700-IEA;GO:0006355-IEA;GO:0043565-IEA;GO:0005634-IEA \\ DNA binding-IEA;DNA-binding transcription factor activity-IEA;regulation of transcription, DNA-templated-IEA	heat shock transcription factor, other eukaryote	Heat shock factor (HSF)-type, DNA-binding	TRINITY_DN180429_c0_g1	FvH4_1g25360.1	0.178	4.85825	4.68025	27.2935	2.64375e-05	0.034806	protein DOG1-like 4 \\ 0.00E+00 \\ 78.97 % \\ GO:0035235-IEA;GO:0016020-IEA;GO:0016021-IEA;GO:0004970-IEA;GO:0006811-IEA \\ ionotropic glutamate receptor signaling pathway-IEA;membrane-IEA;integral component of membrane-IEA;ionotropic glutamate receptor a		Transcription factor TGA like domain	TRINITY_DN14801_c0_g1	FvH4_7g18040.1	1.27025	0.46125	-0.809	-2.75393	0.0042283	0.527324	putative transcription factor NAM family \\ 0.00E+00 \\ 77.41 % \\ GO:0003677-IEA;GO:0006355-IEA;GO:0005634-IEA \\ DNA binding-IEA;regulation of transcription, DNA-templated-IEA;nucleus-IEA \\ GO:0003677;GO:0005634;GO:0006355 \\ DNA binding;nucleus;regula		NAC domain												Total downregulated genes=	23
TRINITY_DN20143_c0_g1	FvH4_5g15340.1	0.77925	1.5645	0.78525	2.0077	0.0252636	1	probable WRKY transcription factor 61 \\ 0.00E+00 \\ 74.70 % \\ GO:0003677-IEA;GO:0003700-IEA;GO:0006355-IEA;GO:0043565-IEA;GO:0005634-IEA \\ DNA binding-IEA;DNA-binding transcription factor activity-IEA;regulation of transcription, DNA-templated-IEA;sequ		WRKY domain	TRINITY_DN2634_c0_g1	FvH4_3g21580.1	3.11825	12.5183	9.4	4.01451	1.6847e-05	0.0296182	scarecrow-like protein 21 \\ 0.00E+00 \\ 87.29 %		Transcription factor GRAS	TRINITY_DN5400_c1_g1	FvH4_6g26090.1	1.78675	0.67175	-1.115	-2.65984	0.00351299	0.485027	ethylene-responsive transcription factor ERF054-like \\ 0.00E+00 \\ 59.83 % \\ GO:0003677-IEA;GO:0003700-IEA;GO:0006351-IEA;GO:0006355-IEA;GO:0005634-IEA \\ DNA binding-IEA;DNA-binding transcription factor activity-IEA;transcription, DNA-templated-IEA;reg		AP2/ERF domain												Total DEGs=	55
Total upregulated genes=	60										TRINITY_DN1087_c0_g2	FvH4_3g36720.1	13.3588	39.4372	26.0785	2.95217	0.00837395	0.621195	scarecrow-like protein 30 \\ 0.00E+00 \\ 76.10 %		Transcription factor GRAS	TRINITY_DN10730_c0_g1	FvH4_2g29440.1	3.3855	1.2825	-2.103	-2.63977	0.00740469	0.691161	transcription factor HY5 \\ 9.30E-50 \\ 93.25 % \\ GO:0003677-IEA;GO:0003700-IEA;GO:0006355-IEA;GO:0005634-IEA \\ DNA binding-IEA;DNA-binding transcription factor activity-IEA;regulation of transcription, DNA-templated-IEA;nucleus-IEA \\ GO:0003677;GO:000	transcription factor HY5	cAMP response element binding (CREB) protein
											Total upregulated genes=	61										TRINITY_DN7140_c0_g1	FvH4_5g05280.1	3.40575	1.35125	-2.0545	-2.52044	0.00146153	0.326734	transcription factor WER-like \\ 1.50E-118 \\ 80.91 %	transcription factor MYB, plant	SANT/Myb domain
Downregulated genes											Downregulated genes											TRINITY_DN10316_c0_g1	FvH4_6g36430.1	3.506	1.46875	-2.03725	-2.38706	0.0175036	0.885713	myb family transcription factor PHL6 \\ 0.00E+00 \\ 82.53 % \\ GO:0003677-IEA;GO:0005634-IEA \\ DNA binding-IEA;nucleus-IEA \\ GO:0003677;GO:0005634 \\ DNA binding;nucleus		SANT/Myb domain
TRINITY_DN11029_c0_g1	FvH4_2g32640.1	8.79075	3.59925	-5.1915	-2.44238	0.00569047	0.477544	AP2-like ethylene-responsive transcription factor ANT \\ 0.00E+00 \\ 81.34 % \\ GO:0003677-IEA;GO:0003700-IEA;GO:0006351-IEA;GO:0006355-IEA;GO:0005634-IEA \\ DNA binding-IEA;DNA-binding transcription factor activity-IEA;transcription, DNA-templated-IEA;re	AP2-like factor, ANT lineage	AP2/ERF domain	TRINITY_DN11029_c0_g1	FvH4_2g32640.1	8.09175	3.59925	-4.4925	-2.24818	0.00115418	0.22085	AP2-like ethylene-responsive transcription factor ANT \\ 0.00E+00 \\ 81.34 % \\ GO:0003677-IEA;GO:0003700-IEA;GO:0006351-IEA;GO:0006355-IEA;GO:0005634-IEA \\ DNA binding-IEA;DNA-binding transcription factor activity-IEA;transcription, DNA-templated-IEA;re	AP2-like factor, ANT lineage	AP2/ERF domain	TRINITY_DN2630_c2_g4	FvH4_3g03630.1	3.595	1.5465	-2.0485	-2.3246	0.000608107	0.232124	MADS-box protein AGL24-like isoform X1 \\ 3.20E-104 \\ 77.67 % \\ GO:0003677-IEA;GO:0003700-IEA;GO:0006351-IEA;GO:0046983-IEA;GO:0006355-IEA;GO:0000977-IEA;GO:0005634-IEA;GO:0045944-IEA \\ DNA binding-IEA;DNA-binding transcription factor activity-IEA;tran		Transcription factor, MADS-box
TRINITY_DN7269_c0_g1	FvH4_5g03920.1	5.20225	2.3445	-2.85775	-2.21892	1.7015e-05	0.0208008	ethylene-responsive transcription factor CRF2 \\ 6.40E-175 \\ 70.39 % \\ GO:0003677-IEA;GO:0003700-IEA;GO:0006351-IEA;GO:0006355-IEA;GO:0005634-IEA \\ DNA binding-IEA;DNA-binding transcription factor activity-IEA;transcription, DNA-templated-IEA;regulatio		AP2/ERF domain	TRINITY_DN13466_c0_g1	FvH4_1g27140.1	1.03375	0.13925	-0.8945	-7.4237	0.0143941	0.836787	AP2-like ethylene-responsive transcription factor TOE3 isoform X7		AP2/ERF domain superfamily	TRINITY_DN61_c0_g1	FvH4_3g30950.1	2.8425	1.23625	-1.60625	-2.29929	0.00767853	0.703397	transcription factor RAX2-like \\ 0.00E+00 \\ 82.83 % \\ GO:0080085-IEA;GO:0009507-IEA;GO:0045038-IEA;GO:0009416-IEA;GO:0016787-IEA \\ signal recognition particle, chloroplast targeting-IEA;chloroplast-IEA;protein import into chloroplast thylakoid membran	transcription factor MYB, plant	SANT/Myb domain
TRINITY_DN1339_c0_g1	FvH4_1g16370.1	7.24775	3.27525	-3.9725	-2.21288	0.000426216	0.119585	ethylene-responsive transcription factor ERF010-like \\ 0.00E+00 \\ 92.68 % \\ GO:0000166-IEA;GO:0005737-IEA;GO:0003878-IEA;GO:0046872-IEA;GO:0003824-IEA;GO:0048037-IEA;GO:0006629-IEA;GO:0006085-IEA;GO:0006101-IEA;GO:0016740-IEA;GO:0005524-IEA;GO:0046912-	EREBP-like factor	AP2/ERF domain	TRINITY_DN2092_c1_g4	FvH4_6g22750.1	1.1875	0.51925	-0.66825	-2.28695	0.00242803	0.32789	bZIP transcription factor TGA10 isoform X1 \\ 0.00E+00 \\ 86.05 % \\ GO:0003700-IEA;GO:0002237-IEA;GO:0042803-IEA;GO:0006351-IEA;GO:0048653-IEA;GO:0006355-IEA;GO:0071588-IEA;GO:0043565-IEA;GO:0005634-IEA \\ DNA-binding transcription factor activity-IEA;re	transcription factor TGA	Basic-leucine zipper domain	TRINITY_DN6081_c0_g1	FvH4_7g18200.1	3.67825	1.69575	-1.9825	-2.1691	0.0444963	0.885713	putative transcription factor NAM family \\ 0.00E+00 \\ 74.49 % \\ GO:0003677-IEA;GO:0046872-IEA;GO:0006355-IEA;GO:0070897-IEA;GO:0017025-IEA;GO:0005634-IEA \\ DNA binding-IEA;metal ion binding-IEA;regulation of transcription, DNA-templated-IEA;transcript		NAC domain
TRINITY_DN5400_c1_g1	FvH4_6g26090.1	1.47	0.47825	-0.99175	-3.07371	0.000976189	0.185181	ethylene-responsive transcription factor ERF054-like \\ 0.00E+00 \\ 59.83 % \\ GO:0003677-IEA;GO:0003700-IEA;GO:0006351-IEA;GO:0006355-IEA;GO:0005634-IEA \\ DNA binding-IEA;DNA-binding transcription factor activity-IEA;transcription, DNA-templated-IEA;reg		AP2/ERF domain	TRINITY_DN10630_c0_g1	FvH4_2g40810.1	17.486	8.43275	-9.05325	-2.07358	0.0010046	0.205503	ethylene-responsive transcription factor ERF003-like \\ 0.00E+00 \\ 78.93 % \\ GO:0055085-IEA;GO:0016020-IEA;GO:0016021-IEA;GO:0008643-IEA;GO:0022857-IEA;GO:0005215-IEA \\ transmembrane transport-IEA;membrane-IEA;integral component of membrane-IEA;carbohy		AP2/ERF domain	TRINITY_DN7972_c0_g1	FvH4_3g01830.1	3.5715	1.65775	-1.91375	-2.15443	0.00116899	0.303376	probable transcription factor KAN4 isoform X3		SANT/Myb domain
TRINITY_DN2075_c0_g2	FvH4_7g20380.1	7.01875	2.44575	-4.573	-2.86977	0.000966951	0.183882	ethylene-responsive transcription factor RAP2-7-like \\ 0.00E+00 \\ 75.19 % \\ GO:0003677-IEA;GO:0003700-IEA;GO:0006351-IEA;GO:0006355-IEA;GO:0005634-IEA \\ DNA binding-IEA;DNA-binding transcription factor activity-IEA;transcription, DNA-templated-IEA;reg	AP2-like factor, euAP2 lineage	AP2/ERF domain	TRINITY_DN5400_c1_g1	FvH4_6g26090.1	1.315	0.47825	-0.83675	-2.74961	0.000538376	0.150128	ethylene-responsive transcription factor ERF054-like \\ 0.00E+00 \\ 59.83 % \\ GO:0003677-IEA;GO:0003700-IEA;GO:0006351-IEA;GO:0006355-IEA;GO:0005634-IEA \\ DNA binding-IEA;DNA-binding transcription factor activity-IEA;transcription, DNA-templated-IEA;reg		AP2/ERF domain	TRINITY_DN10540_c0_g1	FvH4_7g05970.1	1.73025	0.8275	-0.90275	-2.09094	0.00862557	0.745961	trihelix transcription factor PTL-like \\ 5.40E-161 \\ 72.76 % \\ GO:0003700-IBA;GO:0006355-IEA;GO:0043565-IBA;GO:0005634-IBA \\ DNA-binding transcription factor activity-IBA;regulation of transcription, DNA-templated-IEA;sequence-specific DNA binding-IBA		Myb-like domain
TRINITY_DN2410_c1_g4	FvH4_2g34260.1	5.731	2.37275	-3.35825	-2.41534	0.000792323	0.164926	heat stress transcription factor B-4 \\ 0.00E+00 \\ 78.69 % \\ GO:0003677-IEA;GO:0003700-IEA;GO:0003700-IBA;GO:0006355-IEA;GO:0000978-IBA;GO:0061408-IBA;GO:0008356-IEA;GO:0043565-IEA;GO:0043565-IBA;GO:0034605-IBA;GO:0005634-IEA;GO:0005634-IBA \\ DNA bindi	heat shock transcription factor, other eukaryote	Heat shock factor (HSF)-type, DNA-binding	TRINITY_DN2075_c0_g2	FvH4_7g20380.1	5.21925	2.44575	-2.7735	-2.13401	0.0130193	0.792584	ethylene-responsive transcription factor RAP2-7-like \\ 0.00E+00 \\ 75.19 % \\ GO:0003677-IEA;GO:0003700-IEA;GO:0006351-IEA;GO:0006355-IEA;GO:0005634-IEA \\ DNA binding-IEA;DNA-binding transcription factor activity-IEA;transcription, DNA-templated-IEA;reg	AP2-like factor, euAP2 lineage	AP2/ERF domain	TRINITY_DN5225_c0_g2	FvH4_3g10080.1	20.0855	9.621	-10.4645	-2.08767	0.0009452	0.276269	nuclear transcription factor Y subunit A-7 \\ 5.10E-64 \\ 82.64 % \\ GO:0003677-IEA;GO:0016602-IEA;GO:0003700-IEA;GO:0006355-IEA \\ DNA binding-IEA;CCAAT-binding factor complex-IEA;DNA-binding transcription factor activity-IEA;regulation of transcription,	nuclear transcription factor Y, alpha	Nuclear transcription factor Y subunit A
TRINITY_DN530_c0_g1	FvH4_1g04810.1	8.512	2.19775	-6.31425	-3.87305	0.000733761	0.158826	heat stress transcription factor C-1 \\ 2.80E-156 \\ 74.51 % \\ GO:0008152-IEA;GO:0003824-IEA;GO:0016052-IEA;GO:0008496-IEA;GO:0016020-IEA;GO:0016021-IEA;GO:0016798-IEA;GO:0016787-IEA \\ metabolic process-IEA;catalytic activity-IEA;carbohydrate catabolic	heat shock transcription factor, other eukaryote	Heat shock factor (HSF)-type, DNA-binding	TRINITY_DN2410_c1_g4	FvH4_2g34260.1	4.914	2.37275	-2.54125	-2.07101	0.000188374	0.0871577	heat stress transcription factor B-4 \\ 0.00E+00 \\ 78.69 % \\ GO:0003677-IEA;GO:0003700-IEA;GO:0003700-IBA;GO:0006355-IEA;GO:0000978-IBA;GO:0061408-IBA;GO:0008356-IEA;GO:0043565-IEA;GO:0043565-IBA;GO:0034605-IBA;GO:0005634-IEA;GO:0005634-IBA \\ DNA bindi	heat shock transcription factor, other eukaryote	Heat shock factor (HSF)-type, DNA-binding	TRINITY_DN50372_c0_g1	FvH4_6g20510.1	1.074	0.515	-0.559	-2.08544	0.000778595	0.259829	nuclear transcription factor Y subunit A-10-like \\ 0.00E+00 \\ 80.48 % \\ GO:0003700-IEA;GO:0016020-IEA;GO:0016021-IEA;GO:0006355-IEA \\ DNA-binding transcription factor activity-IEA;membrane-IEA;integral component of membrane-IEA;regulation of transcrip	nuclear transcription factor Y, alpha	Nuclear transcription factor Y subunit A
TRINITY_DN1254_c0_g1	FvH4_5g08520.1	66.7215	28.486	-38.2355	-2.34226	0.00778109	0.567769	MADS-box transcription factor 23-like isoform X2 \\ 1.10E-54 \\ 85.47 % \\ GO:0003677-IEA;GO:0003700-IEA;GO:0006351-IEA;GO:0046983-IEA;GO:0006355-IEA;GO:0000977-IEA;GO:0005634-IEA;GO:0045944-IEA \\ DNA binding-IEA;DNA-binding transcription factor activity		Transcription factor, MADS-box	TRINITY_DN530_c0_g1	FvH4_1g04810.1	5.8705	2.19775	-3.67275	-2.67114	0.00136344	0.241956	heat stress transcription factor C-1 \\ 2.80E-156 \\ 74.51 % \\ GO:0008152-IEA;GO:0003824-IEA;GO:0016052-IEA;GO:0008496-IEA;GO:0016020-IEA;GO:0016021-IEA;GO:0016798-IEA;GO:0016787-IEA \\ metabolic process-IEA;catalytic activity-IEA;carbohydrate catabolic	heat shock transcription factor, other eukaryote	Heat shock factor (HSF)-type, DNA-binding	TRINITY_DN10221_c1_g2	FvH4_7g28100.1	1.918	0.9205	-0.9975	-2.08365	0.00683085	0.664681	putative transcription factor C2H2 family \\ 4.00E-55 \\ 77.43 % \\ GO:0000166-IEA;GO:0048544-IEA;GO:0016020-IEA;GO:0016021-IEA;GO:0016310-IEA;GO:0004672-IEA;GO:0016740-IEA;GO:0016301-IEA;GO:0004674-IEA;GO:0005524-IEA;GO:0006468-IEA \\ nucleotide binding-
TRINITY_DN3702_c1_g1	FvH4_2g31100.1	6.21575	1.935	-4.28075	-3.21227	0.0156935	0.840815	myb-related protein 308-like \\ 9.20E-142 \\ 65.28 % \\ GO:0003677-IEA \\ DNA binding-IEA \\ GO:0003677 \\ DNA binding	transcription factor MYB, plant	SANT/Myb domain	TRINITY_DN1254_c0_g1	FvH4_5g08520.1	119.676	28.486	-91.1902	-4.20123	0.000521703	0.148541	MADS-box transcription factor 23-like isoform X2 \\ 1.10E-54 \\ 85.47 % \\ GO:0003677-IEA;GO:0003700-IEA;GO:0006351-IEA;GO:0046983-IEA;GO:0006355-IEA;GO:0000977-IEA;GO:0005634-IEA;GO:0045944-IEA \\ DNA binding-IEA;DNA-binding transcription factor activity		Transcription factor, MADS-box	TRINITY_DN3017_c0_g2	FvH4_2g31090.1	4.05975	1.9585	-2.10125	-2.07289	0.0308891	0.885713	transcription repressor MYB6-like \\ 9.40E-61 \\ 94.00 % \\ GO:0006749-IBA;GO:0005737-IEA;GO:0005737-IBA;GO:0016740-IEA;GO:0004364-IEA;GO:0004364-IBA \\ glutathione metabolic process-IBA;cytoplasm-IEA;cytoplasm-IBA;transferase activity-IEA;glutathione tra	transcription factor MYB, plant	SANT/Myb domain
TRINITY_DN3608_c0_g1	FvH4_6g40610.1	1.6245	0.73325	-0.89125	-2.21548	0.00359912	0.374969	myelin transcription factor 1-like protein \\ 1.80E-99 \\ 69.15 % \\ GO:0016616-IEA;GO:0016491-IEA;GO:0016020-IEA;GO:0016021-IEA;GO:0006102-IEA;GO:0004450-IEA;GO:0055114-IEA \\ oxidoreductase activity, acting on the CH-OH group of donors, NAD or NADP as a			TRINITY_DN29828_c0_g1	FvH4_c6g00060.1	1.1055	0.35175	-0.75375	-3.14286	0.00111646	0.217109	nuclear transcription factor Y subunit B-5 \\ 0.00E+00 \\ 75.65 % \\ GO:0016020-IEA;GO:0016021-IEA;GO:0016310-IEA;GO:0016740-IEA;GO:0016301-IEA;GO:0004674-IEA;GO:0006468-IEA \\ membrane-IEA;integral component of membrane-IEA;phosphorylation-IEA;transferas	nuclear transcription Y subunit beta	Transcription factor, NFYB/HAP3, conserved site	TRINITY_DN5279_c0_g2	FvH4_3g11190.1	1.26475	0.62125	-0.6435	-2.03581	0.0145389	0.885713	transcription factor bHLH52-like \\ 7.10E-117 \\ 68.34 % \\ GO:0046983-IEA;GO:0001228-IBA;GO:0005634-IBA;GO:0045944-IEA \\ protein dimerization activity-IEA;DNA-binding transcription activator activity, RNA polymerase II-specific-IBA;nucleus-IBA;positive		Myc-type, basic helix-loop-helix (bHLH) domain
TRINITY_DN5280_c0_g1	FvH4_1g01900.1	1.15775	0.3965	-0.76125	-2.91992	0.00707633	0.541059	PLATZ transcription factor family protein \\ 1.20E-40 \\ 79.44 %		B-box-type zinc finger	TRINITY_DN5280_c0_g1	FvH4_1g01900.1	1.46725	0.3965	-1.07075	-3.7005	0.00757318	0.591399	PLATZ transcription factor family protein \\ 1.20E-40 \\ 79.44 %		B-box-type zinc finger	TRINITY_DN1275_c0_g3	FvH4_6g34650.1	12.083	5.956	-6.127	-2.02871	0.000501186	0.215757	transcription factor TT2-like \\ 2.20E-143 \\ 70.88 % \\ GO:0003677-IEA \\ DNA binding-IEA \\ GO:0003677 \\ DNA binding	transcription factor MYB, plant	SANT/Myb domain
TRINITY_DN880_c0_g2	FvH4_4g27990.1	21.1413	10.4423	-10.699	-2.02459	0.00219298	0.289109	probable transcription factor GLK2 \\ 8.40E-97 \\ 72.22 % \\ GO:0003677-IEA;GO:0005634-IEA \\ DNA binding-IEA;nucleus-IEA \\ GO:0003677;GO:0005634 \\ DNA binding;nucleus		SANT/Myb domain	TRINITY_DN880_c0_g2	FvH4_4g27990.1	22.777	10.4423	-12.3347	-2.18123	0.00112319	0.21735	probable transcription factor GLK2 \\ 8.40E-97 \\ 72.22 % \\ GO:0003677-IEA;GO:0005634-IEA \\ DNA binding-IEA;nucleus-IEA \\ GO:0003677;GO:0005634 \\ DNA binding;nucleus		SANT/Myb domain	TRINITY_DN264_c2_g1	FvH4_6g37880.1	2.56975	1.27875	-1.291	-2.00958	0.000112018	0.128633	SHATTERPROOF-like protein \\ 7.00E-90 \\ 90.27 % \\ GO:0003677-IEA;GO:0003700-IEA;GO:0006351-IEA;GO:0046983-IEA;GO:0006355-IEA;GO:0000977-IEA;GO:0005634-IEA;GO:0045944-IEA \\ DNA binding-IEA;DNA-binding transcription factor activity-IEA;transcription, DNA	MADS-box transcription factor, plant	Transcription factor, MADS-box
TRINITY_DN7972_c0_g1	FvH4_3g01830.1	4.15475	1.871	-2.28375	-2.2206	0.0336895	1	probable transcription factor KAN4 isoform X3		SANT/Myb domain	TRINITY_DN7972_c0_g1	FvH4_3g01830.1	4.1805	1.871	-2.3095	-2.23437	0.00446325	0.451028	probable transcription factor KAN4 isoform X3		SANT/Myb domain	TRINITY_DN23155_c0_g1	FvH4_5g32850.1	4.46925	2.02425	-2.445	-2.20785	0.0233146	0.885713	agamous-like MADS-box protein AGL12 \\ 3.80E-08 \\ 99.67 % \\ GO:0055085-IEA;GO:0016020-IEA;GO:0016021-IEA \\ transmembrane transport-IEA;membrane-IEA;integral component of membrane-IEA \\ GO:0016021;GO:0055085 \\ integral component of membrane;transmembr		Transcription factor, MADS-box
TRINITY_DN5024_c3_g1	FvH4_3g03780.1	2.62825	1.008	-1.62025	-2.60739	0.00193653	0.271917	protein ODORANT1-like \\ 0.00E+00 \\ 87.57 % \\ GO:0003824-IEA;GO:0008265-IEA;GO:0016020-IEA;GO:0102867-IEA;GO:0016021-IEA;GO:0016740-IEA \\ catalytic activity-IEA;Mo-molybdopterin cofactor sulfurase activity-IEA;membrane-IEA;molybdenum cofactor sulfurtra	transcription factor MYB, plant	SANT/Myb domain	TRINITY_DN2582_c0_g1	FvH4_7g10440.1	11.3083	4.14375	-7.1645	-2.72899	0.00042765	0.13471	probable WRKY transcription factor 12 \\ 1.10E-48 \\ 91.88 % \\ GO:0003677-IEA;GO:0003700-IEA;GO:0006355-IEA;GO:0043565-IEA;GO:0005634-IEA \\ DNA binding-IEA;DNA-binding transcription factor activity-IEA;regulation of transcription, DNA-templated-IEA;sequ			Total downregulated genes=	32
TRINITY_DN8679_c0_g1	FvH4_6g09040.1	1.6395	0.7265	-0.913	-2.25671	0.00327268	0.355631	protein SCARECROW \\ 0.00E+00 \\ 83.59 % \\ GO:0003700-IEA;GO:0051457-IEA;GO:0009630-IEA;GO:0090610-IEA;GO:0048366-IEA;GO:0006355-IEA;GO:0008356-IEA;GO:0043565-IEA;GO:0009956-IEA;GO:0005634-IEA \\ DNA-binding transcription factor activity-IEA;maintenance		Transcription factor GRAS	TRINITY_DN1771_c0_g2	FvH4_2g37040.1	1	0.48625	-0.51375	-2.05656	0.0491761	1	probable WRKY transcription factor protein 1 isoform X1 \\ 0.00E+00 \\ 76.63 %		WD40/YVTN repeat-like-containing domain superfamily	Total DEGs=	73
TRINITY_DN6632_c0_g1	FvH4_2g25070.1	25.2892	9.94025	-15.349	-2.54413	0.00470993	0.434038	putative transcription factor & chromatin remodeling CW-Zn family \\ 0.00E+00 \\ 74.70 % \\ GO:0008270-IEA;GO:0005524-IEA \\ zinc ion binding-IEA;ATP binding-IEA \\ GO:0008270 \\ zinc ion binding		Zinc finger, CW-type	TRINITY_DN6632_c0_g1	FvH4_2g25070.1	27.2952	9.94025	-17.355	-2.74593	8.01579e-05	0.0568992	putative transcription factor & chromatin remodeling CW-Zn family \\ 0.00E+00 \\ 74.70 % \\ GO:0008270-IEA;GO:0005524-IEA \\ zinc ion binding-IEA;ATP binding-IEA \\ GO:0008270 \\ zinc ion binding		Zinc finger, CW-type
TRINITY_DN12628_c0_g1	FvH4_2g26340.1	1.735	0.74075	-0.99425	-2.34222	0.0151616	0.824659	putative transcription factor C2H2 family		Zinc finger C2H2-type	TRINITY_DN14801_c0_g1	FvH4_7g18040.1	1.022	0.43075	-0.59125	-2.37261	0.018623	0.953023	putative transcription factor NAM family \\ 0.00E+00 \\ 77.41 % \\ GO:0003677-IEA;GO:0006355-IEA;GO:0005634-IEA \\ DNA binding-IEA;regulation of transcription, DNA-templated-IEA;nucleus-IEA \\ GO:0003677;GO:0005634;GO:0006355 \\ DNA binding;nucleus;regula		NAC domain
TRINITY_DN6081_c0_g1	FvH4_7g18200.1	3.08975	0.872	-2.21775	-3.54329	0.000528937	0.135791	putative transcription factor NAM family \\ 0.00E+00 \\ 74.49 % \\ GO:0003677-IEA;GO:0046872-IEA;GO:0006355-IEA;GO:0070897-IEA;GO:0017025-IEA;GO:0005634-IEA \\ DNA binding-IEA;metal ion binding-IEA;regulation of transcription, DNA-templated-IEA;transcript		NAC domain	TRINITY_DN569_c0_g1	FvH4_6g18260.1	2.0055	0.98025	-1.02525	-2.04591	0.00320329	0.375508	putative transcription factor WD40-like family \\ 0.00E+00 \\ 75.36 % \\ GO:0003677-IEA;GO:0006355-IEA;GO:0000785-IEA;GO:0005634-IEA \\ DNA binding-IEA;regulation of transcription, DNA-templated-IEA;chromatin-IEA;nucleus-IEA \\ GO:0000785;GO:0003677;GO:00	general transcription factor 3C polypeptide 2	HMG-I/HMG-Y, DNA-binding, conserved site
TRINITY_DN14801_c0_g1	FvH4_7g18040.1	1.00025	0.43075	-0.5695	-2.32211	0.0255174	1	putative transcription factor NAM family \\ 0.00E+00 \\ 77.41 % \\ GO:0003677-IEA;GO:0006355-IEA;GO:0005634-IEA \\ DNA binding-IEA;regulation of transcription, DNA-templated-IEA;nucleus-IEA \\ GO:0003677;GO:0005634;GO:0006355 \\ DNA binding;nucleus;regula		NAC domain	TRINITY_DN264_c2_g1	FvH4_6g37880.1	11.2345	3.08625	-8.14825	-3.64018	0.000556578	0.152134	SHATTERPROOF-like protein \\ 7.00E-90 \\ 90.27 % \\ GO:0003677-IEA;GO:0003700-IEA;GO:0006351-IEA;GO:0046983-IEA;GO:0006355-IEA;GO:0000977-IEA;GO:0005634-IEA;GO:0045944-IEA \\ DNA binding-IEA;DNA-binding transcription factor activity-IEA;transcription, DNA	MADS-box transcription factor, plant	Transcription factor, MADS-box
TRINITY_DN3430_c1_g1	FvH4_7g17950.1	3.942	1.0885	-2.8535	-3.6215	0.00212595	0.284387	putative transcription factor NAM family \\ 0.00E+00 \\ 77.88 % \\ GO:0003677-IEA;GO:0006355-IEA;GO:0005634-IEA \\ DNA binding-IEA;regulation of transcription, DNA-templated-IEA;nucleus-IEA \\ GO:0003677;GO:0005634;GO:0006355 \\ DNA binding;nucleus;regula		NAC domain	TRINITY_DN1202_c1_g1	FvH4_6g22880.1	7.0695	3.197	-3.8725	-2.21129	0.000639344	0.160475	transcription factor bHLH130-like \\ 7.30E-101 \\ 77.04 % \\ GO:0046983-IEA \\ protein dimerization activity-IEA \\ GO:0046983 \\ protein dimerization activity		Myc-type, basic helix-loop-helix (bHLH) domain
TRINITY_DN264_c2_g1	FvH4_6g37880.1	8.5235	3.08625	-5.43725	-2.76177	0.00280865	0.327588	SHATTERPROOF-like protein \\ 7.00E-90 \\ 90.27 % \\ GO:0003677-IEA;GO:0003700-IEA;GO:0006351-IEA;GO:0046983-IEA;GO:0006355-IEA;GO:0000977-IEA;GO:0005634-IEA;GO:0045944-IEA \\ DNA binding-IEA;DNA-binding transcription factor activity-IEA;transcription, DNA	MADS-box transcription factor, plant	Transcription factor, MADS-box	TRINITY_DN231_c4_g1	FvH4_2g02340.1	7.43925	1.227	-6.21225	-6.06296	0.000110286	0.0670136	transcription factor bHLH18-like \\ 0.00E+00 \\ 74.64 % \\ GO:0003677-IEA;GO:0046983-IEA;GO:0016020-IEA;GO:0016021-IEA \\ DNA binding-IEA;protein dimerization activity-IEA;membrane-IEA;integral component of membrane-IEA \\ GO:0046983 \\ protein dimerizati		Myc-type, basic helix-loop-helix (bHLH) domain
TRINITY_DN1202_c1_g1	FvH4_6g22880.1	6.399	3.197	-3.202	-2.00156	0.00695386	0.535569	transcription factor bHLH130-like \\ 7.30E-101 \\ 77.04 % \\ GO:0046983-IEA \\ protein dimerization activity-IEA \\ GO:0046983 \\ protein dimerization activity		Myc-type, basic helix-loop-helix (bHLH) domain	TRINITY_DN16224_c0_g1	FvH4_1g18750.1	1.37825	0.32875	-1.0495	-4.1924	3.1387e-05	0.0370475	transcription factor bHLH18-like \\ 1.40E-136 \\ 91.62 % \\ GO:0009826-IEA;GO:0005618-IEA;GO:0080022-IEA;GO:0016020-IEA;GO:0016021-IEA;GO:0071555-IEA;GO:0009664-IEA;GO:0005576-IEA \\ unidimensional cell growth-IEA;cell wall-IEA;primary root development-IE		Myc-type, basic helix-loop-helix (bHLH) domain
TRINITY_DN231_c4_g1	FvH4_2g02340.1	5.9085	1.227	-4.6815	-4.8154	0.000221665	0.0841182	transcription factor bHLH18-like \\ 0.00E+00 \\ 74.64 % \\ GO:0003677-IEA;GO:0046983-IEA;GO:0016020-IEA;GO:0016021-IEA \\ DNA binding-IEA;protein dimerization activity-IEA;membrane-IEA;integral component of membrane-IEA \\ GO:0046983 \\ protein dimerizati		Myc-type, basic helix-loop-helix (bHLH) domain	TRINITY_DN7249_c0_g1	FvH4_6g10480.1	5.53525	2.72675	-2.8085	-2.02998	0.0445621	1	Transcription factor bHLH61 like \\ 4.60E-138 \\ 79.48 % \\ GO:0008152-IEA;GO:0033946-IEA;GO:0000272-IEA;GO:0005575-ND;GO:0071555-IEA;GO:0004553-IEA;GO:0005576-IEA;GO:0016787-IEA;GO:0016798-IEA;GO:0005975-IEA;GO:0008810-IEA;GO:0030248-IEA \\ metabolic pro		Helix-loop-helix DNA-binding domain superfamily
TRINITY_DN16224_c0_g1	FvH4_1g18750.1	1.4685	0.32875	-1.13975	-4.46692	5.25177e-05	0.0377748	transcription factor bHLH18-like \\ 1.40E-136 \\ 91.62 % \\ GO:0009826-IEA;GO:0005618-IEA;GO:0080022-IEA;GO:0016020-IEA;GO:0016021-IEA;GO:0071555-IEA;GO:0009664-IEA;GO:0005576-IEA \\ unidimensional cell growth-IEA;cell wall-IEA;primary root development-IE		Myc-type, basic helix-loop-helix (bHLH) domain	TRINITY_DN2826_c0_g2	FvH4_4g12760.1	16.3873	6.553	-9.83425	-2.50072	0.00434662	0.444291	transcription factor bHLH62 \\ 0.00E+00 \\ 72.98 % \\ GO:0003677-IEA;GO:0046983-IEA;GO:0016020-IEA;GO:0016021-IEA \\ DNA binding-IEA;protein dimerization activity-IEA;membrane-IEA;integral component of membrane-IEA \\ GO:0046983 \\ protein dimerization ac		Myc-type, basic helix-loop-helix (bHLH) domain
TRINITY_DN9267_c1_g4	FvH4_5g35460.1	1.13	0.4115	-0.7185	-2.74605	0.00213139	0.284743	transcription factor bHLH30-like \\ 0.00E+00 \\ 86.78 % \\ GO:0000166-IEA;GO:0048544-IEA;GO:0016020-IEA;GO:0016021-IEA;GO:0016310-IEA;GO:0004672-IEA;GO:0016740-IEA;GO:0016301-IEA;GO:0004674-IEA;GO:0005524-IEA;GO:0006468-IEA \\ nucleotide binding-IEA;recog		Myc-type, basic helix-loop-helix (bHLH) domain	TRINITY_DN2469_c0_g1	FvH4_3g34960.1	6.8515	1.3685	-5.483	-5.00658	1.25492e-05	0.0246178	transcription factor MYB59 \\ 0.00E+00 \\ 78.28 % \\ GO:0000165-IEA;GO:0004713-IEA;GO:0000186-IEA;GO:0016020-IEA;GO:0016021-IEA;GO:0004709-IEA;GO:0016310-IEA;GO:0016740-IEA;GO:0016301-IEA;GO:0016787-IEA;GO:0018108-IEA;GO:0007165-IEA;GO:0043531-IEA;GO:0004	transcription factor MYB, plant	SANT/Myb domain
TRINITY_DN2826_c0_g2	FvH4_4g12760.1	14.594	6.553	-8.041	-2.22707	0.00792483	0.573637	transcription factor bHLH62 \\ 0.00E+00 \\ 72.98 % \\ GO:0003677-IEA;GO:0046983-IEA;GO:0016020-IEA;GO:0016021-IEA \\ DNA binding-IEA;protein dimerization activity-IEA;membrane-IEA;integral component of membrane-IEA \\ GO:0046983 \\ protein dimerization ac		Myc-type, basic helix-loop-helix (bHLH) domain	TRINITY_DN677_c0_g4	FvH4_3g13230.1	7.8675	2.2345	-5.633	-3.52092	0.000210993	0.0928421	transcription factor MYB86-like \\ 0.00E+00 \\ 75.84 % \\ GO:0003677-IEA;GO:0006355-IEA;GO:0005634-IEA \\ DNA binding-IEA;regulation of transcription, DNA-templated-IEA;nucleus-IEA \\ GO:0003677;GO:0005634;GO:0006355 \\ DNA binding;nucleus;regulation of t	transcription factor MYB, plant	SANT/Myb domain
TRINITY_DN3572_c0_g2	FvH4_2g23820.1	1.631	0.55475	-1.07625	-2.94006	0.0464364	1	transcription factor bHLH69 \\ 0.00E+00 \\ 88.28 % \\ GO:0008152-IEA;GO:0009251-IBA;GO:0016162-IBA;GO:0000272-IEA;GO:0030245-IEA;GO:0004553-IEA;GO:0005975-IEA;GO:0016798-IEA;GO:0016787-IEA \\ metabolic process-IEA;glucan catabolic process-IBA;cellulose 1,		Myc-type, basic helix-loop-helix (bHLH) domain	TRINITY_DN677_c0_g1	FvH4_5g06070.1	6.30125	2.7355	-3.56575	-2.30351	0.00725116	0.579684	transcription factor MYB86-like \\ 1.90E-172 \\ 95.82 % \\ GO:0016020-IEA \\ membrane-IEA \\ GO:0016020 \\ membrane	transcription factor MYB, plant	SANT/Myb domain
TRINITY_DN39455_c0_g2	FvH4_5g31910.1	2.101	0.95425	-1.14675	-2.20173	0.000709754	0.156741	transcription factor bHLH80-like \\ 2.90E-74 \\ 72.66 % \\ GO:0003677-IEA;GO:0046983-IEA \\ DNA binding-IEA;protein dimerization activity-IEA \\ GO:0046983 \\ protein dimerization activity		Myc-type, basic helix-loop-helix (bHLH) domain	TRINITY_DN6880_c1_g1	FvH4_2g11650.1	2.35375	1.1345	-1.21925	-2.0747	0.0159508	0.880165	transcription factor ORG2-like \\ 0.00E+00 \\ 68.15 % \\ GO:0003677-IEA;GO:0045892-IEA \\ DNA binding-IEA;negative regulation of transcription, DNA-templated-IEA \\ GO:0003677;GO:0045892 \\ DNA binding;negative regulation of transcription, DNA-templated		Myc-type, basic helix-loop-helix (bHLH) domain
TRINITY_DN8937_c0_g1	FvH4_6g11950.1	6.96975	3.1195	-3.85025	-2.23425	0.0180229	0.902493	transcription factor DIVARICATA \\ 0.00E+00 \\ 82.35 % \\ GO:0003677-IEA;GO:0005634-IEA \\ DNA binding-IEA;nucleus-IEA \\ GO:0003677;GO:0005634 \\ DNA binding;nucleus		SANT/Myb domain	TRINITY_DN61_c0_g1	FvH4_3g30950.1	2.1515	0.974	-1.1775	-2.20893	0.0294706	1	transcription factor RAX2-like \\ 0.00E+00 \\ 82.83 % \\ GO:0080085-IEA;GO:0009507-IEA;GO:0045038-IEA;GO:0009416-IEA;GO:0016787-IEA \\ signal recognition particle, chloroplast targeting-IEA;chloroplast-IEA;protein import into chloroplast thylakoid membran	transcription factor MYB, plant	SANT/Myb domain
TRINITY_DN10730_c0_g1	FvH4_2g29440.1	2.778	1.04325	-1.73475	-2.66283	6.15555e-05	0.0412248	transcription factor HY5 \\ 9.30E-50 \\ 93.25 % \\ GO:0003677-IEA;GO:0003700-IEA;GO:0006355-IEA;GO:0005634-IEA \\ DNA binding-IEA;DNA-binding transcription factor activity-IEA;regulation of transcription, DNA-templated-IEA;nucleus-IEA \\ GO:0003677;GO:000	transcription factor HY5	cAMP response element binding (CREB) protein	TRINITY_DN2837_c0_g1	FvH4_3g24830.1	6.22975	2.022	-4.20775	-3.08098	6.86022e-05	0.0535143	transcription factor TGA9 isoform X1 \\ 0.00E+00 \\ 88.62 % \\ GO:0002237-IEA;GO:0003700-IEA;GO:0042803-IEA;GO:0006351-IEA;GO:0048653-IEA;GO:0006355-IEA;GO:0071588-IEA;GO:0043565-IEA;GO:0005634-IEA \\ response to molecule of bacterial origin-IEA;DNA-bindi	transcription factor TGA	Basic-leucine zipper domain
TRINITY_DN16625_c0_g1	FvH4_5g09300.1	4.45625	2.2195	-2.23675	-2.00777	0.00607451	0.496174	transcription factor ICE1-like \\ 0.00E+00 \\ 81.97 % \\ GO:0046983-IEA \\ protein dimerization activity-IEA \\ GO:0046983 \\ protein dimerization activity		Myc-type, basic helix-loop-helix (bHLH) domain	TRINITY_DN7140_c0_g1	FvH4_5g05280.1	2.89175	1.349	-1.54275	-2.14362	0.00444105	0.449771	transcription factor WER-like \\ 1.50E-118 \\ 80.91 %	transcription factor MYB, plant	SANT/Myb domain
TRINITY_DN21005_c2_g1	FvH4_1g20680.1	2.5215	0.98825	-1.53325	-2.55148	0.00425898	0.411047	transcription factor MYB39-like \\ 0.00E+00 \\ 75.82 % \\ GO:0016746-IEA;GO:0016747-IEA;GO:0016740-IEA;GO:0047172-IEA \\ transferase activity, transferring acyl groups-IEA;transferase activity, transferring acyl groups other than amino-acyl groups-IEA;tra	transcription factor MYB, plant	SANT/Myb domain	TRINITY_DN11763_c0_g2	FvH4_5g17970.1	2.779	0.8015	-1.9775	-3.46725	0.000250803	0.102162	transcriptional activator Myb \\ 2.20E-157 \\ 75.69 % \\ GO:0003677-IEA \\ DNA binding-IEA \\ GO:0003677 \\ DNA binding	transcription factor MYB, plant	SANT/Myb domain
TRINITY_DN2469_c0_g1	FvH4_3g34960.1	5.96825	1.3685	-4.59975	-4.36116	0.0226754	1	transcription factor MYB59 \\ 0.00E+00 \\ 78.28 % \\ GO:0000165-IEA;GO:0004713-IEA;GO:0000186-IEA;GO:0016020-IEA;GO:0016021-IEA;GO:0004709-IEA;GO:0016310-IEA;GO:0016740-IEA;GO:0016301-IEA;GO:0016787-IEA;GO:0018108-IEA;GO:0007165-IEA;GO:0043531-IEA;GO:0004	transcription factor MYB, plant	SANT/Myb domain	TRINITY_DN4664_c0_g4	FvH4_5g13500.1	2.135	0.94275	-1.19225	-2.26465	0.00102023	0.206063	truncated transcription factor CAULIFLOWER A isoform X1	MADS-box transcription factor, plant	Transcription factor, MADS-box
TRINITY_DN677_c0_g4	FvH4_3g13230.1	4.59325	2.2345	-2.35875	-2.05561	0.00220427	0.289582	transcription factor MYB86-like \\ 0.00E+00 \\ 75.84 % \\ GO:0003677-IEA;GO:0006355-IEA;GO:0005634-IEA \\ DNA binding-IEA;regulation of transcription, DNA-templated-IEA;nucleus-IEA \\ GO:0003677;GO:0005634;GO:0006355 \\ DNA binding;nucleus;regulation of t	transcription factor MYB, plant	SANT/Myb domain	TRINITY_DN4664_c0_g5	FvH4_4g23530.1	1.96175	0.716	-1.24575	-2.73987	0.00162071	0.265086	agamous-like MADS-box protein AGL9 homolog isoform X2 \\ 2.40E-16 \\ 69.42 % \\ GO:0003964-IEA;GO:0016779-IEA;GO:0006278-IEA;GO:0016740-IEA \\ RNA-directed DNA polymerase activity-IEA;nucleotidyltransferase activity-IEA;RNA-dependent DNA biosynthetic proc		Transcription factor, MADS-box
TRINITY_DN677_c0_g1	FvH4_5g06070.1	5.65625	2.7355	-2.92075	-2.06772	0.0225769	1	transcription factor MYB86-like \\ 1.90E-172 \\ 95.82 % \\ GO:0016020-IEA \\ membrane-IEA \\ GO:0016020 \\ membrane	transcription factor MYB, plant	SANT/Myb domain	Total downregulated genes=	34
TRINITY_DN325367_c0_g1	FvH4_6g38230.1	7.1675	3.00475	-4.16275	-2.38539	0.000928675	0.180275	transcription factor PAR1 \\ 4.30E-170 \\ 82.54 % \\ GO:0045927-IEA;GO:0005811-IEA;GO:0003746-IEA;GO:0080186-IEA;GO:1902584-IEA;GO:0034389-IEA;GO:0006414-IEA \\ positive regulation of growth-IEA;lipid droplet-IEA;translation elongation factor activity-IEA		Helix-loop-helix DNA-binding domain superfamily	Total DEGs=	95
TRINITY_DN4655_c0_g1	FvH4_4g34850.1	1.94025	0.7505	-1.18975	-2.58528	0.00390655	0.391284	transcription factor PAR1-like \\ 4.10E-157 \\ 80.46 % \\ GO:0008152-IEA;GO:0005576-IEA;GO:0016798-IEA;GO:0016787-IEA;GO:0005975-IEA;GO:0030248-IEA;GO:0008810-IEA \\ metabolic process-IEA;extracellular region-IEA;hydrolase activity, acting on glycosyl bon
TRINITY_DN61_c0_g1	FvH4_3g30950.1	2.035	0.974	-1.061	-2.08932	0.0336698	1	transcription factor RAX2-like \\ 0.00E+00 \\ 82.83 % \\ GO:0080085-IEA;GO:0009507-IEA;GO:0045038-IEA;GO:0009416-IEA;GO:0016787-IEA \\ signal recognition particle, chloroplast targeting-IEA;chloroplast-IEA;protein import into chloroplast thylakoid membran	transcription factor MYB, plant	SANT/Myb domain
TRINITY_DN2837_c0_g1	FvH4_3g24830.1	4.81875	2.022	-2.79675	-2.38316	0.000584129	0.14256	transcription factor TGA9 isoform X1 \\ 0.00E+00 \\ 88.62 % \\ GO:0002237-IEA;GO:0003700-IEA;GO:0042803-IEA;GO:0006351-IEA;GO:0048653-IEA;GO:0006355-IEA;GO:0071588-IEA;GO:0043565-IEA;GO:0005634-IEA \\ response to molecule of bacterial origin-IEA;DNA-bindi	transcription factor TGA	Basic-leucine zipper domain
TRINITY_DN7140_c0_g1	FvH4_5g05280.1	4.88775	1.349	-3.53875	-3.62324	0.000867755	0.172693	transcription factor WER-like \\ 1.50E-118 \\ 80.91 %	transcription factor MYB, plant	SANT/Myb domain
TRINITY_DN11763_c0_g2	FvH4_5g17970.1	2.0165	0.8015	-1.215	-2.51591	0.00937734	0.633943	transcriptional activator Myb \\ 2.20E-157 \\ 75.69 % \\ GO:0003677-IEA \\ DNA binding-IEA \\ GO:0003677 \\ DNA binding	transcription factor MYB, plant	SANT/Myb domain
TRINITY_DN87_c1_g2	FvH4_6g15050.1	8.7175	4.10825	-4.60925	-2.12195	0.00665065	0.520678	WRKY transcription factor 44 \\ 0.00E+00 \\ 86.85 % \\ GO:0003677-IEA;GO:0003700-IEA;GO:0006355-IEA;GO:0043565-IEA;GO:0005634-IEA \\ DNA binding-IEA;DNA-binding transcription factor activity-IEA;regulation of transcription, DNA-templated-IEA;sequence-spec		WRKY domain
TRINITY_DN29828_c0_g1	FvH4_c6g00060.1	1.2805	0.35175	-0.92875	-3.64037	0.00674319	0.525253	nuclear transcription factor Y subunit B-5 \\ 0.00E+00 \\ 75.65 % \\ GO:0016020-IEA;GO:0016021-IEA;GO:0016310-IEA;GO:0016740-IEA;GO:0016301-IEA;GO:0004674-IEA;GO:0006468-IEA \\ membrane-IEA;integral component of membrane-IEA;phosphorylation-IEA;transferas	nuclear transcription Y subunit beta	Transcription factor, NFYB/HAP3, conserved site
TRINITY_DN5225_c0_g2	FvH4_3g10080.1	30.2063	13.418	-16.7883	-2.25117	0.00410785	0.402298	nuclear transcription factor Y subunit A-7 \\ 5.10E-64 \\ 82.64 % \\ GO:0003677-IEA;GO:0016602-IEA;GO:0003700-IEA;GO:0006355-IEA \\ DNA binding-IEA;CCAAT-binding factor complex-IEA;DNA-binding transcription factor activity-IEA;regulation of transcription,	nuclear transcription factor Y, alpha	Nuclear transcription factor Y subunit A
Total downregulated genes=	44
Total DEGs=	104
[truncated: 16 more columns]

## Sheet: Resistant vs. Susceptible
				NCGR1218_wounded-inoculated_48h Vs NCGR1603_wounded-inoculated_48h										NCGR1218_wounded-inoculated_48h Vs Bukammen_wounded-inoculated_48h
Trinity_ID	Fragaria_vesca4.0_ID	1218_WI-48h Mean (TPM)	1603_WI-48h Mean (TPM)	Difference (TPM)	Fold change	P-value	FDR corrected p-value	NCBI_Nr_Annotations (<1E-3) with GO terms	Fragaria_vesca4.0_KEGG_orthologs_annotations	Fragaria_vesca4.0_InterPro_domain_annotations	Trinity_ID	Fragaria_vesca4.0_ID	1218_WI-48h Mean (TPM)	BK_WI-48h Mean (TPM)	Difference (TPM)	Fold change	P-value	FDR corrected p-value	NCBI_Nr_Annotations (<1E-3) with GO terms	Fragaria_vesca4.0_KEGG_orthologs_annotations	Fragaria_vesca4.0_InterPro_domain_annotations
Genes upregulated or expressed only in NCGR1603											Genes upregulated or expressed only in Bukammen
TRINITY_DN45_c0_g2	FvH4_6g34080.1	0	6.5095	6.5095	#DIV/0!	1.62694e-06	0.00491384	putative transcription factor C2H2 family \\ 2.60E-64 \\ 87.42 %		Zinc finger, RING-type	TRINITY_DN6799_c1_g2	FvH4_3g45070.1	0	7.06175	7.06175	#DIV/0!	2.45545e-05	0.0159589	putative transcription factor C2H2 family \\ 0.00E+00 \\ 54.59 % \\ GO:0008270-IEA;GO:0046872-IEA;GO:0016020-IEA;GO:0016021-IEA \\ zinc ion binding-IEA;metal ion binding-IEA;membrane-IEA;integral component of membrane-IEA		Zinc finger, RING-type
TRINITY_DN4339_c1_g1	FvH4_6g00620.1	0	3.997	3.997	#DIV/0!	4.64963e-07	0.00304768	putative transcription factor C2H2 family \\ 9.80E-98 \\ 65.42 % \\ GO:0008270-IEA;GO:0046872-IEA;GO:0016874-IEA \\ zinc ion binding-IEA;metal ion binding-IEA;ligase activity-IEA \\ GO:0046872 \\ metal ion binding		Zinc finger, RING-type	TRINITY_DN45_c0_g2	FvH4_6g34080.1	0	6.695	6.695	#DIV/0!	3.39125e-06	0.00600933	putative transcription factor C2H2 family \\ 2.60E-64 \\ 87.42 %		Zinc finger, RING-type
TRINITY_DN45_c0_g3	FvH4_6g51870.1	0	2.85525	2.85525	#DIV/0!	0.000539067	0.10598	putative transcription factor C2H2 family		Zinc finger, RING-type	TRINITY_DN4339_c1_g1	FvH4_6g00620.1	0	4.58825	4.58825	#DIV/0!	6.22499e-05	0.0267466	putative transcription factor C2H2 family \\ 9.80E-98 \\ 65.42 % \\ GO:0008270-IEA;GO:0046872-IEA;GO:0016874-IEA \\ zinc ion binding-IEA;metal ion binding-IEA;ligase activity-IEA \\ GO:0046872 \\ metal ion binding		Zinc finger, RING-type
TRINITY_DN6799_c1_g2	FvH4_3g45070.1	0	2.56075	2.56075	#DIV/0!	3.27483e-09	0.000336292	putative transcription factor C2H2 family \\ 0.00E+00 \\ 54.59 % \\ GO:0008270-IEA;GO:0046872-IEA;GO:0016020-IEA;GO:0016021-IEA \\ zinc ion binding-IEA;metal ion binding-IEA;membrane-IEA;integral component of membrane-IEA		Zinc finger, RING-type	TRINITY_DN709_c0_g1	FvH4_2g35820.1	0	3.665	3.665	#DIV/0!	0.000643269	0.10303	putative transcription factor C2H2 family \\ 6.10E-48 \\ 67.78 % \\ GO:0045454-IEA;GO:0005623-IEA \\ cell redox homeostasis-IEA;cell-IEA \\ GO:0005623;GO:0045454 \\ cell;cell redox homeostasis		Zinc finger, RING/FYVE/PHD-type
TRINITY_DN709_c0_g1	FvH4_2g35820.1	0	1.24875	1.24875	#DIV/0!	0.0172306	0.810417	putative transcription factor C2H2 family \\ 6.10E-48 \\ 67.78 % \\ GO:0045454-IEA;GO:0005623-IEA \\ cell redox homeostasis-IEA;cell-IEA \\ GO:0005623;GO:0045454 \\ cell;cell redox homeostasis		Zinc finger, RING/FYVE/PHD-type	TRINITY_DN45_c0_g3	FvH4_6g51870.1	0	2.371	2.371	#DIV/0!	0.00011523	0.0377246	putative transcription factor C2H2 family		Zinc finger, RING-type
TRINITY_DN10673_c0_g3	FvH4_5g04830.1	0.01625	2.4095	2.39325	148.277	0.000247085	0.0674218	putative transcription factor C2H2 family \\ 7.10E-35 \\ 80.26 % \\ GO:0042626-IEA;GO:0016471-IEA;GO:1902600-IEA \\ ATPase activity, coupled to transmembrane movement of substances-IEA;vacuolar proton-transporting V-type ATPase complex-IEA;proton transmembrane transport-IEA \\ GO:0016471;GO:0042626;GO:1902600 \\ vacuolar proton-transporting V-type ATPase complex;ATPase activity, coupled to transm…		Zinc finger, RING-type	TRINITY_DN10673_c0_g3	FvH4_5g04830.1	0.01625	3.29675	3.2805	202.877	0.00169839	0.184494	putative transcription factor C2H2 family \\ 7.10E-35 \\ 80.26 % \\ GO:0042626-IEA;GO:0016471-IEA;GO:1902600-IEA \\ ATPase activity, coupled to transmembrane movement of substances-IEA;vacuolar proton-transporting V-type ATPase complex-IEA;proton transmembrane transport-IEA \\ GO:0016471;GO:0042626;GO:1902600 \\ vacuolar proton-transporting V-type ATPase complex;ATPase activity, coupled to transm…		Zinc finger, RING-type
TRINITY_DN5988_c1_g1	FvH4_1g14700.1	0.029	4.13975	4.11075	142.75	0.000497447	0.100834	B3 domain-containing transcription factor VRN1-like \\ 0.00E+00 \\ 89.00 % \\ GO:0016746-IEA;GO:0090447-IBA;GO:0010143-IBA;GO:0016020-IEA;GO:0016020-IBA;GO:0016021-IEA;GO:0016791-IBA;GO:0016740-IEA;GO:0016311-IEA \\ transferase activity, transferring acyl groups-IEA;glycerol-3-phosphate 2-O-acyltransferase activity-IBA;cutin biosynthetic process-IBA;membrane-IEA;membrane-IBA;integral component of…		B3 DNA binding domain	TRINITY_DN7351_c0_g1	FvH4_5g15240.1	0.22875	2.5365	2.30775	11.0885	0.0310126	0.991272	transcription factor PRE3-like \\ 1.30E-122 \\ 86.03 % \\ GO:0016020-IEA;GO:0016021-IEA;GO:0004672-IEA;GO:0005524-IEA;GO:0006468-IEA \\ membrane-IEA;integral component of membrane-IEA;protein kinase activity-IEA;ATP binding-IEA;protein phosphorylation-IEA \\ GO:0004672;GO:0005524;GO:0006468;GO:0016021 \\ protein kinase activity;ATP binding;protein phosphorylation;integral component of membrane		Myc-type, basic helix-loop-helix (bHLH) domain
TRINITY_DN7351_c0_g1	FvH4_5g15240.1	0.22875	2.12425	1.8955	9.28634	0.011254	0.626833	transcription factor PRE3-like \\ 1.30E-122 \\ 86.03 % \\ GO:0016020-IEA;GO:0016021-IEA;GO:0004672-IEA;GO:0005524-IEA;GO:0006468-IEA \\ membrane-IEA;integral component of membrane-IEA;protein kinase activity-IEA;ATP binding-IEA;protein phosphorylation-IEA \\ GO:0004672;GO:0005524;GO:0006468;GO:0016021 \\ protein kinase activity;ATP binding;protein phosphorylation;integral component of membrane		Myc-type, basic helix-loop-helix (bHLH) domain	TRINITY_DN2729_c0_g1	FvH4_6g47060.1	1.00225	6.913	5.91075	6.89748	0.010685	0.578809	putative transcription factor C2H2 family \\ 2.40E-06 \\ 93.33 %
TRINITY_DN2729_c0_g1	FvH4_6g47060.1	1.00225	5.42875	4.4265	5.41656	0.00414133	0.347569	putative transcription factor C2H2 family \\ 2.40E-06 \\ 93.33 %			TRINITY_DN6880_c1_g1	FvH4_2g11650.1	1.1345	6.82975	5.69525	6.02005	0.0223177	0.920898	transcription factor ORG2-like \\ 0.00E+00 \\ 68.15 % \\ GO:0003677-IEA;GO:0045892-IEA \\ DNA binding-IEA;negative regulation of transcription, DNA-templated-IEA \\ GO:0003677;GO:0045892 \\ DNA binding;negative regulation of transcription, DNA-templated		Myc-type, basic helix-loop-helix (bHLH) domain
TRINITY_DN13820_c0_g2	FvH4_1g20160.1	0.2895	1.473	1.1835	5.08808	0.00121386	0.167968	transcription factor bHLH94-like		Myc-type, basic helix-loop-helix (bHLH) domain	TRINITY_DN2218_c5_g1	FvH4_2g17750.1	3.09675	16.1035	13.0068	5.20013	0.0106636	0.578064	transcription factor IBH1-like \\ 0.00E+00 \\ 78.30 % \\ GO:0006914-IEA;GO:0000045-IBA;GO:0000407-IBA;GO:0015031-IEA;GO:0030242-IEA;GO:0005770-IEA;GO:0019898-IBA;GO:0000422-IBA \\ autophagy-IEA;autophagosome assembly-IBA;phagophore assembly site-IBA;protein transport-IEA;autophagy of peroxisome-IEA;late endosome-IEA;extrinsic component of membrane-IBA;autophagy of mitochondrion-IBA \\ GO:0000045;…		Helix-loop-helix DNA-binding domain superfamily
TRINITY_DN2218_c5_g1	FvH4_2g17750.1	3.09675	14.3655	11.2688	4.6389	6.18393e-06	0.00911523	transcription factor IBH1-like \\ 0.00E+00 \\ 78.30 % \\ GO:0006914-IEA;GO:0000045-IBA;GO:0000407-IBA;GO:0015031-IEA;GO:0030242-IEA;GO:0005770-IEA;GO:0019898-IBA;GO:0000422-IBA \\ autophagy-IEA;autophagosome assembly-IBA;phagophore assembly site-IBA;protein transport-IEA;autophagy of peroxisome-IEA;late endosome-IEA;extrinsic component of membrane-IBA;autophagy of mitochondrion-IBA \\ GO:0000045;…		Helix-loop-helix DNA-binding domain superfamily	TRINITY_DN23479_c0_g1	FvH4_5g02800.1	0.53075	2.46525	1.9345	4.64484	0.00244692	0.231589	putative transcription factor C2H2 family \\ 1.70E-05 \\ 100.00 %		Zinc finger, RING-type
TRINITY_DN23479_c0_g1	FvH4_5g02800.1	0.53075	2.44925	1.9185	4.6147	0.000232113	0.0654673	putative transcription factor C2H2 family \\ 1.70E-05 \\ 100.00 %		Zinc finger, RING-type	TRINITY_DN15162_c0_g1	FvH4_6g52350.1	0.5515	2.23925	1.68775	4.06029	0.00157289	0.176763	putative transcription factor C2H2 family		Zinc finger, RING-type
TRINITY_DN586_c1_g1	FvH4_5g39080.1	0.712	2.46975	1.75775	3.46875	0.0083647	0.525466	DELLA protein RGL1-like \\ 0.00E+00 \\ 73.54 % \\ GO:0003700-IBA;GO:0006355-IEA;GO:0043565-IBA;GO:0005634-IBA \\ DNA-binding transcription factor activity-IBA;regulation of transcription, DNA-templated-IEA;sequence-specific DNA binding-IBA;nucleus-IBA		Transcription factor GRAS	TRINITY_DN3572_c0_g2	FvH4_2g23820.1	0.55475	1.987	1.43225	3.58179	0.00465056	0.346786	transcription factor bHLH69 \\ 0.00E+00 \\ 88.28 % \\ GO:0008152-IEA;GO:0009251-IBA;GO:0016162-IBA;GO:0000272-IEA;GO:0030245-IEA;GO:0004553-IEA;GO:0005975-IEA;GO:0016798-IEA;GO:0016787-IEA \\ metabolic process-IEA;glucan catabolic process-IBA;cellulose 1,4-beta-cellobiosidase activity-IBA;polysaccharide catabolic process-IEA;cellulose catabolic process-IEA;hydrolase activity, hydrolyzing O-glycos…		Myc-type, basic helix-loop-helix (bHLH) domain
TRINITY_DN8199_c0_g1	FvH4_7g17380.1	4.87875	16.8685	11.9897	3.45755	0.00934629	0.563143	transcription factor MYC2 \\ 0.00E+00 \\ 75.92 % \\ GO:0003677-IEA;GO:0046983-IEA \\ DNA binding-IEA;protein dimerization activity-IEA \\ GO:0046983 \\ protein dimerization activity	transcription factor MYC2	Myc-type, basic helix-loop-helix (bHLH) domain	TRINITY_DN5280_c0_g1	FvH4_1g01900.1	0.3965	1.1455	0.749	2.88903	0.00156413	0.176636	PLATZ transcription factor family protein \\ 1.20E-40 \\ 79.44 %		B-box-type zinc finger
TRINITY_DN15162_c0_g1	FvH4_6g52350.1	0.5515	1.831	1.2795	3.32004	0.0108481	0.612698	putative transcription factor C2H2 family		Zinc finger, RING-type	TRINITY_DN10630_c0_g1	FvH4_2g40810.1	8.43275	22.6325	14.1997	2.68388	0.00023804	0.0572021	ethylene-responsive transcription factor ERF003-like \\ 0.00E+00 \\ 78.93 % \\ GO:0055085-IEA;GO:0016020-IEA;GO:0016021-IEA;GO:0008643-IEA;GO:0022857-IEA;GO:0005215-IEA \\ transmembrane transport-IEA;membrane-IEA;integral component of membrane-IEA;carbohydrate transport-IEA;transmembrane transporter activity-IEA;transporter activity-IEA \\ GO:0008643;GO:0016021;GO:0022857;GO:0055085 \\ carbohydra…		AP2/ERF domain
TRINITY_DN16224_c0_g1	FvH4_1g18750.1	0.32875	1.004	0.67525	3.05399	0.0193107	0.865818	transcription factor bHLH18-like \\ 1.40E-136 \\ 91.62 % \\ GO:0009826-IEA;GO:0005618-IEA;GO:0080022-IEA;GO:0016020-IEA;GO:0016021-IEA;GO:0071555-IEA;GO:0009664-IEA;GO:0005576-IEA \\ unidimensional cell growth-IEA;cell wall-IEA;primary root development-IEA;membrane-IEA;integral component of membrane-IEA;cell wall organization-IEA;plant-type cell wall organization-IEA;extracellular region-IEA \\ G…		Myc-type, basic helix-loop-helix (bHLH) domain	TRINITY_DN19795_c0_g1	FvH4_1g14710.1	4.85125	12.935	8.08375	2.66632	0.00104163	0.137546	B3 domain-containing transcription factor VRN1-like \\ 3.80E-168 \\ 91.61 % \\ GO:0003755-IEA;GO:0005739-IEA;GO:0016020-IEA;GO:0006629-IEA;GO:0016021-IEA;GO:0004609-IEA;GO:0016540-IEA;GO:0031305-IEA;GO:0016831-IEA;GO:0016829-IEA;GO:0008654-IEA;GO:0000413-IEA;GO:0006646-IEA;GO:0005743-IEA;GO:0006457-IEA \\ peptidyl-prolyl cis-trans isomerase activity-IEA;mitochondrion-IEA;membrane-IEA;lipid metabo…		B3 DNA binding domain
TRINITY_DN3572_c0_g2	FvH4_2g23820.1	0.55475	1.67675	1.122	3.02253	0.00663035	0.458752	transcription factor bHLH69 \\ 0.00E+00 \\ 88.28 % \\ GO:0008152-IEA;GO:0009251-IBA;GO:0016162-IBA;GO:0000272-IEA;GO:0030245-IEA;GO:0004553-IEA;GO:0005975-IEA;GO:0016798-IEA;GO:0016787-IEA \\ metabolic process-IEA;glucan catabolic process-IBA;cellulose 1,4-beta-cellobiosidase activity-IBA;polysaccharide catabolic process-IEA;cellulose catabolic process-IEA;hydrolase activity, hydrolyzing O-glycos…		Myc-type, basic helix-loop-helix (bHLH) domain	TRINITY_DN3282_c0_g1	FvH4_6g13640.1	6.28275	16.645	10.3622	2.64932	2.02528e-05	0.0145992	transcription factor AS1 \\ 0.00E+00 \\ 91.08 % \\ GO:0003677-IEA;GO:0006351-IEA;GO:0010338-IEA;GO:0005634-IEA \\ DNA binding-IEA;transcription, DNA-templated-IEA;leaf formation-IEA;nucleus-IEA \\ GO:0003677;GO:0005634;GO:0006351;GO:0010338 \\ DNA binding;nucleus;transcription, DNA-templated;leaf formation	transcription factor MYB, plant	SANT/Myb domain
TRINITY_DN19795_c0_g1	FvH4_1g14710.1	4.85125	12.9648	8.1135	2.67246	0.0001297	0.0475111	B3 domain-containing transcription factor VRN1-like \\ 3.80E-168 \\ 91.61 % \\ GO:0003755-IEA;GO:0005739-IEA;GO:0016020-IEA;GO:0006629-IEA;GO:0016021-IEA;GO:0004609-IEA;GO:0016540-IEA;GO:0031305-IEA;GO:0016831-IEA;GO:0016829-IEA;GO:0008654-IEA;GO:0000413-IEA;GO:0006646-IEA;GO:0005743-IEA;GO:0006457-IEA \\ peptidyl-prolyl cis-trans isomerase activity-IEA;mitochondrion-IEA;membrane-IEA;lipid metabo…		B3 DNA binding domain	TRINITY_DN10257_c0_g1	FvH4_5g09850.1	2.78925	7.3285	4.53925	2.62741	0.00136931	0.161769	putative transcription factor C2H2 family \\ 2.40E-152 \\ 60.73 % \\ GO:0016746-IEA;GO:0008270-IEA;GO:0046872-IEA;GO:0016020-IEA;GO:0004839-IEA;GO:0016021-IEA;GO:0016740-IEA;GO:0016874-IEA;GO:0016567-IEA \\ transferase activity, transferring acyl groups-IEA;zinc ion binding-IEA;metal ion binding-IEA;membrane-IEA;ubiquitin activating enzyme activity-IEA;integral component of membrane-IEA;transfera…		Zinc finger, RING-type
TRINITY_DN10630_c0_g1	FvH4_2g40810.1	8.43275	21.8302	13.3975	2.58875	0.000748122	0.125942	ethylene-responsive transcription factor ERF003-like \\ 0.00E+00 \\ 78.93 % \\ GO:0055085-IEA;GO:0016020-IEA;GO:0016021-IEA;GO:0008643-IEA;GO:0022857-IEA;GO:0005215-IEA \\ transmembrane transport-IEA;membrane-IEA;integral component of membrane-IEA;carbohydrate transport-IEA;transmembrane transporter activity-IEA;transporter activity-IEA \\ GO:0008643;GO:0016021;GO:0022857;GO:0055085 \\ carbohydra…		AP2/ERF domain	TRINITY_DN10316_c0_g1	FvH4_6g36430.1	0.64575	1.6715	1.02575	2.58846	0.000150097	0.0438299	myb family transcription factor PHL6 \\ 0.00E+00 \\ 82.53 % \\ GO:0003677-IEA;GO:0005634-IEA \\ DNA binding-IEA;nucleus-IEA \\ GO:0003677;GO:0005634 \\ DNA binding;nucleus		SANT/Myb domain
TRINITY_DN3282_c0_g1	FvH4_6g13640.1	6.28275	15.51	9.22725	2.46866	6.92837e-05	0.0330634	transcription factor AS1 \\ 0.00E+00 \\ 91.08 % \\ GO:0003677-IEA;GO:0006351-IEA;GO:0010338-IEA;GO:0005634-IEA \\ DNA binding-IEA;transcription, DNA-templated-IEA;leaf formation-IEA;nucleus-IEA \\ GO:0003677;GO:0005634;GO:0006351;GO:0010338 \\ DNA binding;nucleus;transcription, DNA-templated;leaf formation	transcription factor MYB, plant	SANT/Myb domain	TRINITY_DN9267_c1_g4	FvH4_5g35460.1	0.4115	1.032	0.6205	2.5079	0.0120872	0.627992	transcription factor bHLH30-like \\ 0.00E+00 \\ 86.78 % \\ GO:0000166-IEA;GO:0048544-IEA;GO:0016020-IEA;GO:0016021-IEA;GO:0016310-IEA;GO:0004672-IEA;GO:0016740-IEA;GO:0016301-IEA;GO:0004674-IEA;GO:0005524-IEA;GO:0006468-IEA \\ nucleotide binding-IEA;recognition of pollen-IEA;membrane-IEA;integral component of membrane-IEA;phosphorylation-IEA;protein kinase activity-IEA;transferase activity-IEA;ki…		Myc-type, basic helix-loop-helix (bHLH) domain
TRINITY_DN10257_c0_g1	FvH4_5g09850.1	2.78925	6.668	3.87875	2.39061	0.00291565	0.282994	putative transcription factor C2H2 family \\ 2.40E-152 \\ 60.73 % \\ GO:0016746-IEA;GO:0008270-IEA;GO:0046872-IEA;GO:0016020-IEA;GO:0004839-IEA;GO:0016021-IEA;GO:0016740-IEA;GO:0016874-IEA;GO:0016567-IEA \\ transferase activity, transferring acyl groups-IEA;zinc ion binding-IEA;metal ion binding-IEA;membrane-IEA;ubiquitin activating enzyme activity-IEA;integral component of membrane-IEA;transfera…		Zinc finger, RING-type	TRINITY_DN77170_c0_g2	FvH4_5g09520.1	3.96625	9.3135	5.34725	2.34819	0.00736571	0.459171	ethylene-responsive transcription factor ERF114-like \\ 1.40E-149 \\ 88.82 % \\ GO:0003677-IEA;GO:0003700-IEA;GO:0006351-IEA;GO:0046983-IEA;GO:0006355-IEA;GO:0000977-IEA;GO:0005634-IEA;GO:0045944-IEA \\ DNA binding-IEA;DNA-binding transcription factor activity-IEA;transcription, DNA-templated-IEA;protein dimerization activity-IEA;regulation of transcription, DNA-templated-IEA;RNA polymerase II re…		AP2/ERF domain
TRINITY_DN3608_c0_g1	FvH4_6g40610.1	0.73325	1.6855	0.95225	2.29867	0.025032	0.929067	myelin transcription factor 1-like protein \\ 1.80E-99 \\ 69.15 % \\ GO:0016616-IEA;GO:0016491-IEA;GO:0016020-IEA;GO:0016021-IEA;GO:0006102-IEA;GO:0004450-IEA;GO:0055114-IEA \\ oxidoreductase activity, acting on the CH-OH group of donors, NAD or NADP as acceptor-IEA;oxidoreductase activity-IEA;membrane-IEA;integral component of membrane-IEA;isocitrate metabolic process-IEA;isocitrate dehydrogenas…			TRINITY_DN2410_c1_g4	FvH4_2g34260.1	2.37275	5.5505	3.17775	2.33927	0.00728889	0.456107	heat stress transcription factor B-4 \\ 0.00E+00 \\ 78.69 % \\ GO:0003677-IEA;GO:0003700-IEA;GO:0003700-IBA;GO:0006355-IEA;GO:0000978-IBA;GO:0061408-IBA;GO:0008356-IEA;GO:0043565-IEA;GO:0043565-IBA;GO:0034605-IBA;GO:0005634-IEA;GO:0005634-IBA \\ DNA binding-IEA;DNA-binding transcription factor activity-IEA;DNA-binding transcription factor activity-IBA;regulation of transcription, DNA-templated-IE…	heat shock transcription factor, other eukaryote	Heat shock factor (HSF)-type, DNA-binding
TRINITY_DN1254_c0_g1	FvH4_5g08520.1	28.486	65.0662	36.5802	2.28415	0.0300708	0.929067	MADS-box transcription factor 23-like isoform X2 \\ 1.10E-54 \\ 85.47 % \\ GO:0003677-IEA;GO:0003700-IEA;GO:0006351-IEA;GO:0046983-IEA;GO:0006355-IEA;GO:0000977-IEA;GO:0005634-IEA;GO:0045944-IEA \\ DNA binding-IEA;DNA-binding transcription factor activity-IEA;transcription, DNA-templated-IEA;protein dimerization activity-IEA;regulation of transcription, DNA-templated-IEA;RNA polymerase II regulat…		Transcription factor, MADS-box	TRINITY_DN11352_c0_g1	FvH4_6g48970.1	1.95975	4.53575	2.576	2.31445	0.0414004	0.991272	transcription factor PRE6-like \\ 9.40E-05 \\ 87.88 % \\ GO:0016020-IEA;GO:0016021-IEA \\ membrane-IEA;integral component of membrane-IEA
TRINITY_DN3017_c1_g1	FvH4_2g32340.1	0.8785	2.00125	1.12275	2.27803	0.00685773	0.466783	transcription factor MYB36-like \\ 0.00E+00 \\ 99.32 % \\ GO:0003677-IEA;GO:0006281-IEA;GO:0006260-IEA;GO:0046982-IEA;GO:0005524-IEA \\ DNA binding-IEA;DNA repair-IEA;DNA replication-IEA;protein heterodimerization activity-IEA;ATP binding-IEA \\ GO:0003677;GO:0005524;GO:0006260;GO:0006281;GO:0046982 \\ DNA binding;ATP binding;DNA replication;DNA repair;protein heterodimerization activity	transcription factor MYB, plant	SANT/Myb domain	TRINITY_DN1339_c0_g1	FvH4_1g16370.1	3.27525	7.226	3.95075	2.20624	0.00544459	0.379716	ethylene-responsive transcription factor ERF010-like \\ 0.00E+00 \\ 92.68 % \\ GO:0000166-IEA;GO:0005737-IEA;GO:0003878-IEA;GO:0046872-IEA;GO:0003824-IEA;GO:0048037-IEA;GO:0006629-IEA;GO:0006085-IEA;GO:0006101-IEA;GO:0016740-IEA;GO:0005524-IEA;GO:0046912-IEA \\ nucleotide binding-IEA;cytoplasm-IEA;ATP citrate synthase activity-IEA;metal ion binding-IEA;catalytic activity-IEA;cofactor binding-IEA;…	EREBP-like factor	AP2/ERF domain
TRINITY_DN10316_c0_g1	FvH4_6g36430.1	0.64575	1.46875	0.823	2.27449	0.00332239	0.30539	myb family transcription factor PHL6 \\ 0.00E+00 \\ 82.53 % \\ GO:0003677-IEA;GO:0005634-IEA \\ DNA binding-IEA;nucleus-IEA \\ GO:0003677;GO:0005634 \\ DNA binding;nucleus		SANT/Myb domain	TRINITY_DN2826_c0_g2	FvH4_4g12760.1	6.553	13.8202	7.26725	2.109	0.00874105	0.510494	transcription factor bHLH62 \\ 0.00E+00 \\ 72.98 % \\ GO:0003677-IEA;GO:0046983-IEA;GO:0016020-IEA;GO:0016021-IEA \\ DNA binding-IEA;protein dimerization activity-IEA;membrane-IEA;integral component of membrane-IEA \\ GO:0046983 \\ protein dimerization activity		Myc-type, basic helix-loop-helix (bHLH) domain
TRINITY_DN45_c0_g4	FvH4_6g51730.1	16.5422	36.174	19.6318	2.18676	0.000325715	0.0798725	putative transcription factor C2H2 family		Zinc finger, RING-type	TRINITY_DN46507_c0_g1	FvH4_5g38390.1	1.712	4.91975	3.20775	2.87369	0.000850732	0.121336		transcription factor TGA	DnaJ domain
TRINITY_DN20143_c0_g1	FvH4_5g15340.1	1.5645	3.2705	1.706	2.09044	0.0183714	0.841299	probable WRKY transcription factor 61 \\ 0.00E+00 \\ 74.70 % \\ GO:0003677-IEA;GO:0003700-IEA;GO:0006355-IEA;GO:0043565-IEA;GO:0005634-IEA \\ DNA binding-IEA;DNA-binding transcription factor activity-IEA;regulation of transcription, DNA-templated-IEA;sequence-specific DNA binding-IEA;nucleus-IEA \\ GO:0003700;GO:0005634;GO:0006355;GO:0043565 \\ DNA-binding transcription factor activity;nucleus;re…		WRKY domain	TRINITY_DN18320_c0_g1	FvH4_1g22110.1	6.725	15.5998	8.87475	2.31967	0.0199874	0.857542		nuclear transcription Y subunit beta	Transcription factor, NFYB/HAP3, conserved site
TRINITY_DN18320_c0_g1	FvH4_1g22110.1	6.725	15.7038	8.97875	2.33513	0.00695249	0.470286		nuclear transcription Y subunit beta	Transcription factor, NFYB/HAP3, conserved site	Total upregulated genes=	27
Total upregulated genes=	28
Downregulated genes in NCGR1603											Downregulated genes in Bukammen
TRINITY_DN1308_c0_g2	FvH4_4g28030.1	15.7032	0	-15.7032	#DIV/0!	0.00104962	0.15325	AP2/ERF and B3 domain-containing transcription factor RAV1 \\ 1.00E-102 \\ 87.43 % \\ GO:0016874-IEA;GO:0009536-IEA \\ ligase activity-IEA;plastid-IEA \\ GO:0009536;GO:0016874 \\ plastid;ligase activity	RAV-like factor	AP2/ERF domain	TRINITY_DN1308_c0_g2	FvH4_4g28030.1	15.7032	0	-15.7032	#DIV/0!	0.00104962	0.137892	AP2/ERF and B3 domain-containing transcription factor RAV1 \\ 1.00E-102 \\ 87.43 % \\ GO:0016874-IEA;GO:0009536-IEA \\ ligase activity-IEA;plastid-IEA \\ GO:0009536;GO:0016874 \\ plastid;ligase activity	RAV-like factor	AP2/ERF domain
TRINITY_DN3067_c0_g1	FvH4_5g10410.1	1.23075	0.54225	-0.6885	-2.26971	0.0184693	0.843616	B3 domain-containing transcription factor NGA1-like \\ 0.00E+00 \\ 66.27 % \\ GO:0003677-IEA;GO:0006351-IEA;GO:0006355-IEA;GO:0005634-IEA \\ DNA binding-IEA;transcription, DNA-templated-IEA;regulation of transcription, DNA-templated-IEA;nucleus-IEA \\ GO:0003677;GO:0005634;GO:0006355 \\ DNA binding;nucleus;regulation of transcription, DNA-templated		B3 DNA binding domain	TRINITY_DN35309_c0_g3	FvH4_5g05180.1	4.512	0.0485	-4.4635	-93.0309	4.07952e-05	0.0213714	transcription factor bHLH162-like \\ 6.10E-113 \\ 56.26 % \\ GO:0003677-IEA;GO:0006355-IEA \\ DNA binding-IEA;regulation of transcription, DNA-templated-IEA		Myc-type, basic helix-loop-helix (bHLH) domain
TRINITY_DN2980_c0_g1	FvH4_1g14640.1	4.281	2.0565	-2.2245	-2.08169	0.0215228	0.925795	B3 domain-containing transcription factor VRN1-like \\ 0.00E+00 \\ 54.97 % \\ GO:0003677-IEA;GO:0006351-IEA;GO:0006355-IEA;GO:0005634-IEA \\ DNA binding-IEA;transcription, DNA-templated-IEA;regulation of transcription, DNA-templated-IEA;nucleus-IEA \\ GO:0003677;GO:0005634;GO:0006355 \\ DNA binding;nucleus;regulation of transcription, DNA-templated		B3 DNA binding domain	TRINITY_DN6321_c0_g2	FvH4_2g21560.1	2.7615	0.0925	-2.669	-29.8541	0.000166128	0.0463158	ethylene-responsive transcription factor ERF098-like \\ 0.00E+00 \\ 99.70 % \\ GO:0006616-IEA;GO:0000166-IEA;GO:0006515-IEA;GO:0005829-IEA;GO:0051082-IEA;GO:0005524-IEA;GO:0016887-IEA;GO:0006457-IEA \\ SRP-dependent cotranslational protein targeting to membrane, translocation-IEA;nucleotide binding-IEA;protein quality control for misfolded or incompletely synthesized proteins-IEA;cytosol-IEA;unfo…		AP2/ERF domain
TRINITY_DN6692_c0_g1	FvH4_5g39200.1	81.1775	37.0983	-44.0792	-2.18818	0.000351331	0.0833856	bZIP transcription factor 53-like \\ 0.00E+00 \\ 72.37 % \\ GO:0051213-IEA;GO:0046872-IEA;GO:0016491-IEA;GO:0016707-IEA;GO:0055114-IEA \\ dioxygenase activity-IEA;metal ion binding-IEA;oxidoreductase activity-IEA;gibberellin 3-beta-dioxygenase activity-IEA;oxidation-reduction process-IEA \\ GO:0016707;GO:0046872;GO:0055114 \\ gibberellin 3-beta-dioxygenase activity;metal ion binding;oxidation-red…		Basic-leucine zipper domain	TRINITY_DN2417_c0_g1	FvH4_4g31810.1	6.76675	0.23525	-6.5315	-28.7641	4.05783e-06	0.00654487	putative transcription factor C2H2 family \\ 0.00E+00 \\ 91.27 % \\ GO:0055085-IEA;GO:0015297-IEA;GO:0016020-IEA;GO:0016021-IEA;GO:0005773-IEA;GO:0006855-IEA;GO:0006855-IBA;GO:0005774-IEA;GO:0005774-IBA;GO:0015238-IEA;GO:0015238-IBA \\ transmembrane transport-IEA;antiporter activity-IEA;membrane-IEA;integral component of membrane-IEA;vacuole-IEA;drug transmembrane transport-IEA;drug transmembrane…		Zinc finger, RING-type
TRINITY_DN6944_c0_g1	FvH4_7g10080.1	6.50825	1.29375	-5.2145	-5.03053	0.00177929	0.209696	ethylene-responsive transcription factor 13-like \\ 2.10E-125 \\ 94.15 % \\ GO:0016491-IEA;GO:0016020-IEA;GO:0016021-IEA;GO:0055114-IEA;GO:0009522-IEA;GO:0015979-IEA;GO:0009538-IEA \\ oxidoreductase activity-IEA;membrane-IEA;integral component of membrane-IEA;oxidation-reduction process-IEA;photosystem I-IEA;photosynthesis-IEA;photosystem I reaction center-IEA \\ GO:0009538;GO:0015979;GO:0016021;…		AP2/ERF domain	TRINITY_DN6423_c0_g1	FvH4_2g41070.1	10.9378	0.456	-10.4818	-23.9863	0.000408682	0.0787876	probable WRKY transcription factor 40 \\ 3.40E-102 \\ 74.68 %		WRKY domain
TRINITY_DN24531_c0_g2	FvH4_4g03470.1	62.1977	10.4322	-51.7655	-5.96206	4.20452e-05	0.0247141	ethylene-responsive transcription factor 1B	ethylene-responsive transcription factor 1	AP2/ERF domain	TRINITY_DN6189_c1_g1	FvH4_4g03450.1	7.19075	0.5625	-6.62825	-12.7836	0.00175402	0.188015	ethylene-responsive transcription factor ERF096-like \\ 8.50E-144 \\ 67.36 % \\ GO:0051764-IEA;GO:0051764-IBA;GO:0051764-IDA;GO:0051017-IEA;GO:0051017-IDA;GO:0005737-IEA;GO:0005737-IDA;GO:0051015-IEA;GO:0051015-IPI;GO:0051015-IBA;GO:0003779-IEA;GO:0005509-IEA;GO:0005509-IDA;GO:0030046-IEA;GO:0030046-IBA;GO:0030046-IDA;GO:0030863-IEA;GO:0030863-IBA;GO:0030863-IDA;GO:0031941-IEA;GO:0031941-IDA;GO:0…		AP2/ERF domain
TRINITY_DN6321_c0_g1	FvH4_6g02270.1	3.402	0.75975	-2.64225	-4.47779	0.00106901	0.154688	ethylene-responsive transcription factor 1B-like \\ 1.70E-11 \\ 54.73 % \\ GO:0003964-IEA;GO:0016779-IEA;GO:0008270-IEA;GO:0090502-IEA;GO:0005739-IEA;GO:0006278-IEA;GO:0016740-IEA;GO:0004523-IEA;GO:0003676-IEA \\ RNA-directed DNA polymerase activity-IEA;nucleotidyltransferase activity-IEA;zinc ion binding-IEA;RNA phosphodiester bond hydrolysis, endonucleolytic-IEA;mitochondrion-IEA;RNA-dependent …	ethylene-responsive transcription factor 1	AP2/ERF domain	TRINITY_DN2213_c0_g2	FvH4_1g07710.1	2.521	0.234	-2.287	-10.7735	8.13699e-05	0.0310243	putative transcription factor bHLH041 isoform X1 \\ 0.00E+00 \\ 76.14 % \\ GO:0046983-IEA;GO:0016020-IEA;GO:0016021-IEA \\ protein dimerization activity-IEA;membrane-IEA;integral component of membrane-IEA \\ GO:0016020;GO:0046983 \\ membrane;protein dimerization activity		Myc-type, basic helix-loop-helix (bHLH) domain
TRINITY_DN113_c4_g1	FvH4_7g26920.1	35.8897	11.4067	-24.483	-3.14636	1.78293e-05	0.0154098	ethylene-responsive transcription factor 2-like \\ 3.40E-170 \\ 64.54 % \\ GO:0003677-IEA;GO:0003700-IEA;GO:0006351-IEA;GO:0006355-IEA;GO:0005634-IEA \\ DNA binding-IEA;DNA-binding transcription factor activity-IEA;transcription, DNA-templated-IEA;regulation of transcription, DNA-templated-IEA;nucleus-IEA \\ GO:0003677;GO:0003700;GO:0005634;GO:0006355 \\ DNA binding;DNA-binding transcription fact…	EREBP-like factor	AP2/ERF domain	TRINITY_DN510_c1_g1	FvH4_2g33720.1	6.0185	0.561	-5.4575	-10.7282	0.000140901	0.0423486	putative transcription factor MYC/MYB \\ 0.00E+00 \\ 84.72 %		Transcription factor MYC/MYB N-terminal
TRINITY_DN6944_c0_g2	FvH4_7g10070.1	4.572	1.8135	-2.7585	-2.52109	0.00130112	0.174808	ethylene-responsive transcription factor 2-like \\ 8.80E-22 \\ 74.99 % \\ GO:0046872-IEA \\ metal ion binding-IEA \\ GO:0046872 \\ metal ion binding		AP2/ERF domain	TRINITY_DN6321_c0_g1	FvH4_6g02270.1	3.402	0.34525	-3.05675	-9.85373	0.000376449	0.0755914	ethylene-responsive transcription factor 1B-like \\ 1.70E-11 \\ 54.73 % \\ GO:0003964-IEA;GO:0016779-IEA;GO:0008270-IEA;GO:0090502-IEA;GO:0005739-IEA;GO:0006278-IEA;GO:0016740-IEA;GO:0004523-IEA;GO:0003676-IEA \\ RNA-directed DNA polymerase activity-IEA;nucleotidyltransferase activity-IEA;zinc ion binding-IEA;RNA phosphodiester bond hydrolysis, endonucleolytic-IEA;mitochondrion-IEA;RNA-dependent …	ethylene-responsive transcription factor 1	AP2/ERF domain
TRINITY_DN15604_c0_g1	FvH4_2g22290.1	1.23775	0.30325	-0.9345	-4.08162	0.0469124	0.929067	ethylene-responsive transcription factor 3-like		AP2/ERF domain	TRINITY_DN24531_c0_g2	FvH4_4g03470.1	62.1977	7.2135	-54.9842	-8.62241	2.1677e-05	0.0150472	ethylene-responsive transcription factor 1B	ethylene-responsive transcription factor 1	AP2/ERF domain
TRINITY_DN6203_c0_g2	FvH4_2g13240.1	12.3432	4.3965	-7.94675	-2.80752	0.00179106	0.210439	ethylene-responsive transcription factor ABR1-like \\ 4.20E-72 \\ 76.48 % \\ GO:0003677-IEA;GO:0003700-IEA;GO:0006351-IEA;GO:0006355-IEA;GO:0005634-IEA \\ DNA binding-IEA;DNA-binding transcription factor activity-IEA;transcription, DNA-templated-IEA;regulation of transcription, DNA-templated-IEA;nucleus-IEA \\ GO:0003677;GO:0003700;GO:0005634;GO:0006355 \\ DNA binding;DNA-binding transcription fa…		AP2/ERF domain	TRINITY_DN6944_c0_g2	FvH4_7g10070.1	4.572	0.56175	-4.01025	-8.13885	5.00921e-05	0.0239625	ethylene-responsive transcription factor 2-like \\ 8.80E-22 \\ 74.99 % \\ GO:0046872-IEA \\ metal ion binding-IEA \\ GO:0046872 \\ metal ion binding		AP2/ERF domain
TRINITY_DN6189_c1_g1	FvH4_4g03450.1	7.19075	1.14625	-6.0445	-6.27328	0.00375095	0.328656	ethylene-responsive transcription factor ERF096-like \\ 8.50E-144 \\ 67.36 % \\ GO:0051764-IEA;GO:0051764-IBA;GO:0051764-IDA;GO:0051017-IEA;GO:0051017-IDA;GO:0005737-IEA;GO:0005737-IDA;GO:0051015-IEA;GO:0051015-IPI;GO:0051015-IBA;GO:0003779-IEA;GO:0005509-IEA;GO:0005509-IDA;GO:0030046-IEA;GO:0030046-IBA;GO:0030046-IDA;GO:0030863-IEA;GO:0030863-IBA;GO:0030863-IDA;GO:0031941-IEA;GO:0031941-IDA;GO:0…		AP2/ERF domain	TRINITY_DN22858_c0_g1	FvH4_1g03190.1	1.0365	0.1325	-0.904	-7.82264	0.0270552	0.991272	ethylene-responsive transcription factor WIN1-like		AP2/ERF domain
TRINITY_DN838_c0_g4	FvH4_4g03460.1	1.363	0.1405	-1.2225	-9.70107	0.0161564	0.780877	ethylene-responsive transcription factor ERF098		AP2/ERF domain	TRINITY_DN6944_c0_g1	FvH4_7g10080.1	6.50825	0.861	-5.64725	-7.55894	0.00051144	0.0899824	ethylene-responsive transcription factor 13-like \\ 2.10E-125 \\ 94.15 % \\ GO:0016491-IEA;GO:0016020-IEA;GO:0016021-IEA;GO:0055114-IEA;GO:0009522-IEA;GO:0015979-IEA;GO:0009538-IEA \\ oxidoreductase activity-IEA;membrane-IEA;integral component of membrane-IEA;oxidation-reduction process-IEA;photosystem I-IEA;photosynthesis-IEA;photosystem I reaction center-IEA \\ GO:0009538;GO:0015979;GO:0016021;…		AP2/ERF domain
TRINITY_DN6321_c0_g2	FvH4_2g21560.1	2.7615	0.362	-2.3995	-7.62845	0.000331425	0.0803953	ethylene-responsive transcription factor ERF098-like \\ 0.00E+00 \\ 99.70 % \\ GO:0006616-IEA;GO:0000166-IEA;GO:0006515-IEA;GO:0005829-IEA;GO:0051082-IEA;GO:0005524-IEA;GO:0016887-IEA;GO:0006457-IEA \\ SRP-dependent cotranslational protein targeting to membrane, translocation-IEA;nucleotide binding-IEA;protein quality control for misfolded or incompletely synthesized proteins-IEA;cytosol-IEA;unfo…		AP2/ERF domain	TRINITY_DN172294_c0_g1	FvH4_4g02610.1	1.6025	0.21925	-1.38325	-7.30901	0.0375062	0.991272	transcription factor bHLH92 \\ 4.90E-131 \\ 82.40 % \\ GO:0016192-IEA;GO:0016020-IEA;GO:0016021-IEA;GO:0005622-IEA;GO:0006886-IEA \\ vesicle-mediated transport-IEA;membrane-IEA;integral component of membrane-IEA;intracellular-IEA;intracellular protein transport-IEA \\ GO:0005622;GO:0006886;GO:0016021;GO:0016192 \\ intracellular;intracellular protein transport;integral component of membrane;vesicl…		Myc-type, basic helix-loop-helix (bHLH) domain
TRINITY_DN9672_c0_g1	FvH4_7g26930.1	147.193	46.4903	-100.702	-3.1661	5.75746e-05	0.0299106	ethylene-responsive transcription factor ERF105-like \\ 0.00E+00 \\ 52.31 %	EREBP-like factor	AP2/ERF domain	TRINITY_DN3537_c0_g1	FvH4_7g16150.1	139.386	21.1755	-118.211	-6.58243	3.47363e-06	0.00601192	probable WRKY transcription factor 46 \\ 1.10E-124 \\ 80.90 % \\ GO:0003677-IEA;GO:0003700-IEA;GO:0006355-IEA;GO:0043565-IEA;GO:0005634-IEA \\ DNA binding-IEA;DNA-binding transcription factor activity-IEA;regulation of transcription, DNA-templated-IEA;sequence-specific DNA binding-IEA;nucleus-IEA \\ GO:0003700;GO:0005634;GO:0006355;GO:0043565 \\ DNA-binding transcription factor activity;nucleus;r…		WRKY domain
TRINITY_DN22858_c0_g1	FvH4_1g03190.1	1.0365	0.043	-0.9935	-24.1047	0.0187592	0.850999	ethylene-responsive transcription factor WIN1-like		AP2/ERF domain	TRINITY_DN7613_c0_g1	FvH4_1g26490.1	72.6397	11.11	-61.5297	-6.53823	0.0214356	0.897492	putative transcription factor WD40-like family \\ 0.00E+00 \\ 84.75 % \\ GO:0008233-IEA;GO:0006508-IEA \\ peptidase activity-IEA;proteolysis-IEA \\ GO:0006508;GO:0008233 \\ proteolysis;peptidase activity		WD40-like Beta Propeller
TRINITY_DN275_c2_g1	FvH4_2g18520.1	9.532	4.47275	-5.05925	-2.13113	5.24167e-05	0.0287546	ethylene-responsive transcription factor-like protein At4g13040 \\ 1.30E-126 \\ 78.39 % \\ GO:0003677-IEA;GO:0003700-IEA;GO:0006355-IEA;GO:0005634-IEA \\ DNA binding-IEA;DNA-binding transcription factor activity-IEA;regulation of transcription, DNA-templated-IEA;nucleus-IEA \\ GO:0003677;GO:0003700;GO:0005634;GO:0006355 \\ DNA binding;DNA-binding transcription factor activity;nucleus;regulation o…		AP2/ERF domain	TRINITY_DN8110_c0_g1	FvH4_2g01040.1	7.9325	1.394	-6.5385	-5.69046	0.000132048	0.0407084	putative transcription factor C2H2 family \\ 1.60E-127 \\ 83.43 % \\ GO:0016020-IEA;GO:0016021-IEA \\ membrane-IEA;integral component of membrane-IEA \\ GO:0016021 \\ integral component of membrane		Zinc finger, RING-type
TRINITY_DN534_c0_g1	FvH4_2g10220.1	19.404	9.1275	-10.2765	-2.12588	0.000153657	0.0519049	GATA transcription factor 5-like \\ 0.00E+00 \\ 62.77 % \\ GO:0003677-IEA;GO:0003700-IEA;GO:0008270-IEA;GO:0046872-IEA;GO:0045893-IEA;GO:0006355-IEA;GO:0043565-IEA;GO:0005634-IEA \\ DNA binding-IEA;DNA-binding transcription factor activity-IEA;zinc ion binding-IEA;metal ion binding-IEA;positive regulation of transcription, DNA-templated-IEA;regulation of transcription, DNA-templated-IEA;sequence-…		Zinc finger, GATA-type	TRINITY_DN3017_c0_g1	FvH4_5g11930.1	57.8032	10.172	-47.6312	-5.68258	6.44191e-05	0.0272979	transcription factor MYB108-like \\ 6.10E-118 \\ 63.74 % \\ GO:0004869-IEA;GO:0030414-IEA;GO:0010951-IEA;GO:0010466-IEA \\ cysteine-type endopeptidase inhibitor activity-IEA;peptidase inhibitor activity-IEA;negative regulation of endopeptidase activity-IEA;negative regulation of peptidase activity-IEA \\ GO:0004869;GO:0010951 \\ cysteine-type endopeptidase inhibitor activity;negative regulation o…	transcription factor MYB, plant	SANT/Myb domain
TRINITY_DN1603_c1_g1	FvH4_6g24120.1	28.8305	12.7175	-16.113	-2.26699	0.00051326	0.102609	heat stress transcription factor B-3	heat shock transcription factor, other eukaryote	Heat shock factor (HSF)-type, DNA-binding	TRINITY_DN12946_c0_g1	FvH4_6g53770.1	19.927	3.51	-16.417	-5.67721	7.48477e-05	0.0294111	probable WRKY transcription factor 75 \\ 2.00E-51 \\ 93.84 % \\ GO:0003677-IEA;GO:0003700-IEA;GO:0006355-IEA;GO:0043565-IEA;GO:0005634-IEA \\ DNA binding-IEA;DNA-binding transcription factor activity-IEA;regulation of transcription, DNA-templated-IEA;sequence-specific DNA binding-IEA;nucleus-IEA \\ GO:0003700;GO:0005634;GO:0006355;GO:0043565 \\ DNA-binding transcription factor activity;nucleus;re…		WRKY domain
TRINITY_DN14588_c0_g1	FvH4_7g31070.1	1.16075	0.13025	-1.0305	-8.91171	0.025656	0.929067	MYB-like transcription factor TCL1	transcription factor MYB, plant	SANT/Myb domain	TRINITY_DN4848_c0_g1	FvH4_5g01790.1	1.508	0.2675	-1.2405	-5.63738	0.00818116	0.492356	transcription factor MYB3R-3-like isoform X1 \\ 0.00E+00 \\ 82.19 %	transcriptional activator Myb	SANT/Myb domain
TRINITY_DN9945_c0_g1	FvH4_2g16180.1	19.752	8.78175	-10.9702	-2.24921	0.00568308	0.419049	NAC transcription factor \\ 1.10E-67 \\ 92.41 % \\ GO:0003677-IEA;GO:0045792-IEA;GO:0006355-IEA;GO:0010200-IEA;GO:0005634-IEA;GO:0009965-IEA;GO:0048281-IEA \\ DNA binding-IEA;negative regulation of cell size-IEA;regulation of transcription, DNA-templated-IEA;response to chitin-IEA;nucleus-IEA;leaf morphogenesis-IEA;inflorescence morphogenesis-IEA \\ GO:0003677;GO:0005634;GO:0006355;GO:0009965;GO:…		NAC domain	TRINITY_DN24747_c0_g2	FvH4_6g45410.1	1.1505	0.2165	-0.934	-5.31409	0.00259593	0.239886	transcription factor CYCLOIDEA-like \\ 3.30E-158 \\ 65.72 % \\ GO:0003677-IEA;GO:0006351-IEA;GO:0006355-IEA;GO:0005634-IEA \\ DNA binding-IEA;transcription, DNA-templated-IEA;regulation of transcription, DNA-templated-IEA;nucleus-IEA \\ GO:0003677;GO:0005634;GO:0006355 \\ DNA binding;nucleus;regulation of transcription, DNA-templated		Transcription factor, TCP
TRINITY_DN34360_c0_g1	FvH4_6g10510.1	15.245	5.405	-9.84	-2.82054	7.70195e-05	0.0350476	probable WRKY transcription factor 33 \\ 0.00E+00 \\ 72.73 % \\ GO:0003677-IEA;GO:0003700-IEA;GO:0006355-IEA;GO:0043565-IEA;GO:0005634-IEA \\ DNA binding-IEA;DNA-binding transcription factor activity-IEA;regulation of transcription, DNA-templated-IEA;sequence-specific DNA binding-IEA;nucleus-IEA \\ GO:0003700;GO:0005634;GO:0006355;GO:0043565 \\ DNA-binding transcription factor activity;nucleus;re…	WRKY transcription factor 33	WRKY domain	TRINITY_DN6203_c0_g2	FvH4_2g13240.1	12.3432	2.518	-9.82525	-4.90201	0.000460024	0.0843436	ethylene-responsive transcription factor ABR1-like \\ 4.20E-72 \\ 76.48 % \\ GO:0003677-IEA;GO:0003700-IEA;GO:0006351-IEA;GO:0006355-IEA;GO:0005634-IEA \\ DNA binding-IEA;DNA-binding transcription factor activity-IEA;transcription, DNA-templated-IEA;regulation of transcription, DNA-templated-IEA;nucleus-IEA \\ GO:0003677;GO:0003700;GO:0005634;GO:0006355 \\ DNA binding;DNA-binding transcription fa…		AP2/ERF domain
TRINITY_DN6423_c0_g1	FvH4_2g41070.1	10.9378	0.42025	-10.5175	-26.0268	0.000401448	0.0907367	probable WRKY transcription factor 40 \\ 3.40E-102 \\ 74.68 %		WRKY domain	TRINITY_DN15604_c0_g1	FvH4_2g22290.1	1.23775	0.2575	-0.98025	-4.8068	0.0361366	0.991272	ethylene-responsive transcription factor 3-like		AP2/ERF domain
TRINITY_DN6167_c0_g1	FvH4_2g41060.1	13.4108	5.31025	-8.1005	-2.52545	0.00379373	0.330618	probable WRKY transcription factor 40 isoform X1 \\ 0.00E+00 \\ 66.88 % \\ GO:0003677-IEA;GO:0003700-IEA;GO:0006355-IEA;GO:0043565-IEA;GO:0005634-IEA \\ DNA binding-IEA;DNA-binding transcription factor activity-IEA;regulation of transcription, DNA-templated-IEA;sequence-specific DNA binding-IEA;nucleus-IEA \\ GO:0003700;GO:0005634;GO:0006355;GO:0043565 \\ DNA-binding transcription factor activity…		WRKY domain	TRINITY_DN2980_c0_g1	FvH4_1g14640.1	4.281	0.90375	-3.37725	-4.73693	0.00254794	0.237072	B3 domain-containing transcription factor VRN1-like \\ 0.00E+00 \\ 54.97 % \\ GO:0003677-IEA;GO:0006351-IEA;GO:0006355-IEA;GO:0005634-IEA \\ DNA binding-IEA;transcription, DNA-templated-IEA;regulation of transcription, DNA-templated-IEA;nucleus-IEA \\ GO:0003677;GO:0005634;GO:0006355 \\ DNA binding;nucleus;regulation of transcription, DNA-templated		B3 DNA binding domain
TRINITY_DN3537_c0_g1	FvH4_7g16150.1	139.386	21.3062	-118.08	-6.54204	5.32801e-06	0.00863895	probable WRKY transcription factor 46 \\ 1.10E-124 \\ 80.90 % \\ GO:0003677-IEA;GO:0003700-IEA;GO:0006355-IEA;GO:0043565-IEA;GO:0005634-IEA \\ DNA binding-IEA;DNA-binding transcription factor activity-IEA;regulation of transcription, DNA-templated-IEA;sequence-specific DNA binding-IEA;nucleus-IEA \\ GO:0003700;GO:0005634;GO:0006355;GO:0043565 \\ DNA-binding transcription factor activity;nucleus;r…		WRKY domain	TRINITY_DN6051_c0_g1	FvH4_4g23480.1	67.4045	15.6595	-51.745	-4.30438	1.43952e-05	0.0123876	probable WRKY transcription factor 75 \\ 3.40E-57 \\ 96.31 % \\ GO:0003677-IEA;GO:0003700-IEA;GO:0006355-IEA;GO:0043565-IEA;GO:0005634-IEA \\ DNA binding-IEA;DNA-binding transcription factor activity-IEA;regulation of transcription, DNA-templated-IEA;sequence-specific DNA binding-IEA;nucleus-IEA \\ GO:0003700;GO:0005634;GO:0006355;GO:0043565 \\ DNA-binding transcription factor activity;nucleus;re…		WRKY domain
TRINITY_DN2837_c0_g2	FvH4_1g22820.1	20.6208	6.90775	-13.713	-2.98516	0.000996111	0.149329	probable WRKY transcription factor 51 \\ 5.70E-44 \\ 86.10 % \\ GO:0000166-IEA;GO:0048544-IEA;GO:0016020-IEA;GO:0016021-IEA;GO:0016310-IEA;GO:0016740-IEA;GO:0004672-IEA;GO:0016301-IEA;GO:0004674-IEA;GO:0005524-IEA;GO:0006468-IEA \\ nucleotide binding-IEA;recognition of pollen-IEA;membrane-IEA;integral component of membrane-IEA;phosphorylation-IEA;transferase activity-IEA;protein kinase activity-I…		WRKY domain	TRINITY_DN9672_c0_g1	FvH4_7g26930.1	147.193	37.4047	-109.788	-3.93514	3.29771e-05	0.0189347	ethylene-responsive transcription factor ERF105-like \\ 0.00E+00 \\ 52.31 %	EREBP-like factor	AP2/ERF domain
TRINITY_DN4036_c0_g2	FvH4_7g26030.1	41.9997	15.1152	-26.8845	-2.77863	0.000341907	0.0819698	probable WRKY transcription factor 70 \\ 0.00E+00 \\ 96.19 % \\ GO:0008270-IEA;GO:0016491-IEA;GO:0046872-IEA;GO:0055114-IEA;GO:0008643-IEA \\ zinc ion binding-IEA;oxidoreductase activity-IEA;metal ion binding-IEA;oxidation-reduction process-IEA;carbohydrate transport-IEA \\ GO:0008270;GO:0008643;GO:0016491;GO:0055114 \\ zinc ion binding;carbohydrate transport;oxidoreductase activity;oxidation-red…		WRKY domain	TRINITY_DN2695_c1_g5	FvH4_6g26360.1	6.62825	1.692	-4.93625	-3.91741	0.00322614	0.27555	transcription factor bHLH162-like \\ 2.40E-98 \\ 92.10 % \\ GO:0045893-IBA;GO:0005634-IBA \\ positive regulation of transcription, DNA-templated-IBA;nucleus-IBA \\ GO:0005634;GO:0045893 \\ nucleus;positive regulation of transcription, DNA-templated		Myc-type, basic helix-loop-helix (bHLH) domain
TRINITY_DN12946_c0_g1	FvH4_6g53770.1	19.927	5.24775	-14.6792	-3.79725	0.000102665	0.0416705	probable WRKY transcription factor 75 \\ 2.00E-51 \\ 93.84 % \\ GO:0003677-IEA;GO:0003700-IEA;GO:0006355-IEA;GO:0043565-IEA;GO:0005634-IEA \\ DNA binding-IEA;DNA-binding transcription factor activity-IEA;regulation of transcription, DNA-templated-IEA;sequence-specific DNA binding-IEA;nucleus-IEA \\ GO:0003700;GO:0005634;GO:0006355;GO:0043565 \\ DNA-binding transcription factor activity;nucleus;re…		WRKY domain	TRINITY_DN3202_c0_g1	FvH4_4g20750.1	2.35275	0.712	-1.64075	-3.30442	0.000847026	0.121031	transcription factor MYB108 \\ 1.40E-166 \\ 68.65 % \\ GO:0003677-IEA;GO:0043565-IBA;GO:0005634-IBA \\ DNA binding-IEA;sequence-specific DNA binding-IBA;nucleus-IBA \\ GO:0003677 \\ DNA binding	transcription factor MYB, plant	SANT/Myb domain
TRINITY_DN6051_c0_g1	FvH4_4g23480.1	67.4045	20.689	-46.7155	-3.25799	6.06004e-05	0.0305052	probable WRKY transcription factor 75 \\ 3.40E-57 \\ 96.31 % \\ GO:0003677-IEA;GO:0003700-IEA;GO:0006355-IEA;GO:0043565-IEA;GO:0005634-IEA \\ DNA binding-IEA;DNA-binding transcription factor activity-IEA;regulation of transcription, DNA-templated-IEA;sequence-specific DNA binding-IEA;nucleus-IEA \\ GO:0003700;GO:0005634;GO:0006355;GO:0043565 \\ DNA-binding transcription factor activity;nucleus;re…		WRKY domain	TRINITY_DN2837_c0_g2	FvH4_1g22820.1	20.6208	6.57	-14.0508	-3.13862	0.000163477	0.0458256	probable WRKY transcription factor 51 \\ 5.70E-44 \\ 86.10 % \\ GO:0000166-IEA;GO:0048544-IEA;GO:0016020-IEA;GO:0016021-IEA;GO:0016310-IEA;GO:0016740-IEA;GO:0004672-IEA;GO:0016301-IEA;GO:0004674-IEA;GO:0005524-IEA;GO:0006468-IEA \\ nucleotide binding-IEA;recognition of pollen-IEA;membrane-IEA;integral component of membrane-IEA;phosphorylation-IEA;transferase activity-IEA;protein kinase activity-I…		WRKY domain
TRINITY_DN2213_c0_g2	FvH4_1g07710.1	2.521	0.30925	-2.21175	-8.15198	0.000159556	0.0530797	putative transcription factor bHLH041 isoform X1 \\ 0.00E+00 \\ 76.14 % \\ GO:0046983-IEA;GO:0016020-IEA;GO:0016021-IEA \\ protein dimerization activity-IEA;membrane-IEA;integral component of membrane-IEA \\ GO:0016020;GO:0046983 \\ membrane;protein dimerization activity		Myc-type, basic helix-loop-helix (bHLH) domain	TRINITY_DN8530_c0_g1	FvH4_3g15320.1	5.73175	1.8355	-3.89625	-3.12272	0.00035264	0.0726674	transcription factor MYB63 \\ 0.00E+00 \\ 61.65 % \\ GO:0003677-IEA;GO:0030154-IBA;GO:0044212-IBA;GO:0043565-IBA;GO:0005634-IBA \\ DNA binding-IEA;cell differentiation-IBA;transcription regulatory region DNA binding-IBA;sequence-specific DNA binding-IBA;nucleus-IBA \\ GO:0003677 \\ DNA binding	transcription factor MYB, plant	SANT/Myb domain
TRINITY_DN3702_c0_g1	FvH4_5g08080.1	25.4752	12.2395	-13.2357	-2.0814	0.000407607	0.0912584	putative transcription factor C2H2 family \\ 0.00E+00 \\ 83.96 %		Zinc finger, RING-type	TRINITY_DN3067_c0_g1	FvH4_5g10410.1	1.23075	0.3945	-0.83625	-3.11977	0.0055263	0.38309	B3 domain-containing transcription factor NGA1-like \\ 0.00E+00 \\ 66.27 % \\ GO:0003677-IEA;GO:0006351-IEA;GO:0006355-IEA;GO:0005634-IEA \\ DNA binding-IEA;transcription, DNA-templated-IEA;regulation of transcription, DNA-templated-IEA;nucleus-IEA \\ GO:0003677;GO:0005634;GO:0006355 \\ DNA binding;nucleus;regulation of transcription, DNA-templated		B3 DNA binding domain
TRINITY_DN2417_c0_g1	FvH4_4g31810.1	6.76675	0.9905	-5.77625	-6.83165	8.54835e-06	0.0102871	putative transcription factor C2H2 family \\ 0.00E+00 \\ 91.27 % \\ GO:0055085-IEA;GO:0015297-IEA;GO:0016020-IEA;GO:0016021-IEA;GO:0005773-IEA;GO:0006855-IEA;GO:0006855-IBA;GO:0005774-IEA;GO:0005774-IBA;GO:0015238-IEA;GO:0015238-IBA \\ transmembrane transport-IEA;antiporter activity-IEA;membrane-IEA;integral component of membrane-IEA;vacuole-IEA;drug transmembrane transport-IEA;drug transmembrane…		Zinc finger, RING-type	TRINITY_DN113_c4_g1	FvH4_7g26920.1	35.8897	11.572	-24.3178	-3.10143	1.79317e-05	0.0141519	ethylene-responsive transcription factor 2-like \\ 3.40E-170 \\ 64.54 % \\ GO:0003677-IEA;GO:0003700-IEA;GO:0006351-IEA;GO:0006355-IEA;GO:0005634-IEA \\ DNA binding-IEA;DNA-binding transcription factor activity-IEA;transcription, DNA-templated-IEA;regulation of transcription, DNA-templated-IEA;nucleus-IEA \\ GO:0003677;GO:0003700;GO:0005634;GO:0006355 \\ DNA binding;DNA-binding transcription fact…	EREBP-like factor	AP2/ERF domain
TRINITY_DN15162_c0_g2	FvH4_2g16170.1	14.7525	5.55825	-9.19425	-2.65416	0.000569922	0.109941	putative transcription factor C2H2 family \\ 0.00E+00 \\ 93.75 % \\ GO:0044183-IBA;GO:0000166-IEA;GO:0051787-IBA;GO:0005737-IBA;GO:0005739-IBA;GO:0034620-IBA;GO:0034605-IBA;GO:0016887-IBA;GO:0031072-IBA;GO:0051085-IBA;GO:0042026-IBA;GO:0006986-IBA;GO:0051082-IEA;GO:0051082-IBA;GO:0005524-IEA;GO:0005524-IBA;GO:0042623-IBA;GO:0006457-IEA \\ protein binding involved in protein folding-IBA;nucleotide…		Zinc finger, RING-type	TRINITY_DN34360_c0_g1	FvH4_6g10510.1	15.245	5.12275	-10.1222	-2.97594	3.03016e-05	0.017952	probable WRKY transcription factor 33 \\ 0.00E+00 \\ 72.73 % \\ GO:0003677-IEA;GO:0003700-IEA;GO:0006355-IEA;GO:0043565-IEA;GO:0005634-IEA \\ DNA binding-IEA;DNA-binding transcription factor activity-IEA;regulation of transcription, DNA-templated-IEA;sequence-specific DNA binding-IEA;nucleus-IEA \\ GO:0003700;GO:0005634;GO:0006355;GO:0043565 \\ DNA-binding transcription factor activity;nucleus;re…	WRKY transcription factor 33	WRKY domain
TRINITY_DN8110_c0_g1	FvH4_2g01040.1	7.9325	0.955	-6.9775	-8.30628	0.000108032	0.0431973	putative transcription factor C2H2 family \\ 1.60E-127 \\ 83.43 % \\ GO:0016020-IEA;GO:0016021-IEA \\ membrane-IEA;integral component of membrane-IEA \\ GO:0016021 \\ integral component of membrane		Zinc finger, RING-type	TRINITY_DN6189_c1_g2	FvH4_5g19840.1	105.834	37.0767	-68.7572	-2.85446	0.00383594	0.307659	ethylene-responsive transcription factor 2 \\ 4.50E-106 \\ 71.65 %	EREBP-like factor	AP2/ERF domain
TRINITY_DN45_c0_g6	FvH4_6g06910.1	4.62	2.1415	-2.4785	-2.15737	0.000126101	0.0469744	putative transcription factor C2H2 family \\ 3.80E-26 \\ 76.13 % \\ GO:0016020-IEA;GO:0016021-IEA;GO:0016310-IEA;GO:0004672-IEA;GO:0016740-IEA;GO:0016301-IEA;GO:0005524-IEA;GO:0006468-IEA \\ membrane-IEA;integral component of membrane-IEA;phosphorylation-IEA;protein kinase activity-IEA;transferase activity-IEA;kinase activity-IEA;ATP binding-IEA;protein phosphorylation-IEA \\ GO:0016020;GO:001630…		Zinc finger, RING-type	TRINITY_DN2834_c0_g1	FvH4_6g28650.1	62.7185	22.59	-40.1285	-2.77638	0.00208074	0.208897	probable WRKY transcription factor 40 \\ 2.90E-72 \\ 87.96 % \\ GO:0003677-IEA;GO:0003700-IEA;GO:0006355-IEA;GO:0043565-IEA;GO:0005634-IEA \\ DNA binding-IEA;DNA-binding transcription factor activity-IEA;regulation of transcription, DNA-templated-IEA;sequence-specific DNA binding-IEA;nucleus-IEA \\ GO:0003700;GO:0005634;GO:0006355;GO:0043565 \\ DNA-binding transcription factor activity;nucleus;re…		WRKY domain
TRINITY_DN510_c1_g1	FvH4_2g33720.1	6.0185	0.89425	-5.12425	-6.73022	0.000180239	0.0568335	putative transcription factor MYC/MYB \\ 0.00E+00 \\ 84.72 %		Transcription factor MYC/MYB N-terminal	TRINITY_DN45_c0_g6	FvH4_6g06910.1	4.62	1.67375	-2.94625	-2.76027	2.06157e-05	0.0146941	putative transcription factor C2H2 family \\ 3.80E-26 \\ 76.13 % \\ GO:0016020-IEA;GO:0016021-IEA;GO:0016310-IEA;GO:0004672-IEA;GO:0016740-IEA;GO:0016301-IEA;GO:0005524-IEA;GO:0006468-IEA \\ membrane-IEA;integral component of membrane-IEA;phosphorylation-IEA;protein kinase activity-IEA;transferase activity-IEA;kinase activity-IEA;ATP binding-IEA;protein phosphorylation-IEA \\ GO:0016020;GO:001630…		Zinc finger, RING-type
TRINITY_DN7613_c0_g1	FvH4_1g26490.1	72.6397	10.3513	-62.2885	-7.01749	0.0200418	0.885964	putative transcription factor WD40-like family \\ 0.00E+00 \\ 84.75 % \\ GO:0008233-IEA;GO:0006508-IEA \\ peptidase activity-IEA;proteolysis-IEA \\ GO:0006508;GO:0008233 \\ proteolysis;peptidase activity		WD40-like Beta Propeller	TRINITY_DN3702_c0_g1	FvH4_5g08080.1	25.4752	9.5275	-15.9477	-2.67387	0.000102705	0.0351098	putative transcription factor C2H2 family \\ 0.00E+00 \\ 83.96 %		Zinc finger, RING-type
TRINITY_DN2695_c1_g5	FvH4_6g26360.1	6.62825	2.08875	-4.5395	-3.17331	0.00396663	0.339728	transcription factor bHLH162-like \\ 2.40E-98 \\ 92.10 % \\ GO:0045893-IBA;GO:0005634-IBA \\ positive regulation of transcription, DNA-templated-IBA;nucleus-IBA \\ GO:0005634;GO:0045893 \\ nucleus;positive regulation of transcription, DNA-templated		Myc-type, basic helix-loop-helix (bHLH) domain	TRINITY_DN6926_c0_g1	FvH4_2g21550.1	8.843	3.46575	-5.37725	-2.55154	0.0168658	0.771926	ethylene-responsive transcription factor 1B-like \\ 1.70E-170 \\ 62.36 % \\ GO:0003677-IEA;GO:0007165-IEA;GO:0043531-IEA \\ DNA binding-IEA;signal transduction-IEA;ADP binding-IEA	ethylene-responsive transcription factor 1	AP2/ERF domain
TRINITY_DN35309_c0_g3	FvH4_5g05180.1	4.512	0.22075	-4.29125	-20.4394	6.26134e-05	0.0311621	transcription factor bHLH162-like \\ 6.10E-113 \\ 56.26 % \\ GO:0003677-IEA;GO:0006355-IEA \\ DNA binding-IEA;regulation of transcription, DNA-templated-IEA		Myc-type, basic helix-loop-helix (bHLH) domain	TRINITY_DN2078_c0_g2	FvH4_1g00230.1	1.357	0.549	-0.808	-2.47177	0.00299786	0.263352	general transcription factor 3C polypeptide 5-like \\ 1.20E-33 \\ 98.41 %	general transcription factor 3C polypeptide 5 (transcription factor C subunit 1)	Transcription factor IIIC, subunit 5
TRINITY_DN24747_c0_g2	FvH4_6g45410.1	1.1505	0.421	-0.7295	-2.73278	0.01151	0.636142	transcription factor CYCLOIDEA-like \\ 3.30E-158 \\ 65.72 % \\ GO:0003677-IEA;GO:0006351-IEA;GO:0006355-IEA;GO:0005634-IEA \\ DNA binding-IEA;transcription, DNA-templated-IEA;regulation of transcription, DNA-templated-IEA;nucleus-IEA \\ GO:0003677;GO:0005634;GO:0006355 \\ DNA binding;nucleus;regulation of transcription, DNA-templated		Transcription factor, TCP	TRINITY_DN534_c0_g1	FvH4_2g10220.1	19.404	7.925	-11.479	-2.44845	9.21283e-05	0.0332009	GATA transcription factor 5-like \\ 0.00E+00 \\ 62.77 % \\ GO:0003677-IEA;GO:0003700-IEA;GO:0008270-IEA;GO:0046872-IEA;GO:0045893-IEA;GO:0006355-IEA;GO:0043565-IEA;GO:0005634-IEA \\ DNA binding-IEA;DNA-binding transcription factor activity-IEA;zinc ion binding-IEA;metal ion binding-IEA;positive regulation of transcription, DNA-templated-IEA;regulation of transcription, DNA-templated-IEA;sequence-…		Zinc finger, GATA-type
TRINITY_DN3202_c0_g1	FvH4_4g20750.1	2.35275	1.048	-1.30475	-2.24499	0.0106371	0.605818	transcription factor MYB108 \\ 1.40E-166 \\ 68.65 % \\ GO:0003677-IEA;GO:0043565-IBA;GO:0005634-IBA \\ DNA binding-IEA;sequence-specific DNA binding-IBA;nucleus-IBA \\ GO:0003677 \\ DNA binding	transcription factor MYB, plant	SANT/Myb domain	TRINITY_DN12399_c0_g1	FvH4_4g24820.1	2.2815	0.93425	-1.34725	-2.44207	0.022916	0.937172	DELLA protein RGL1-like \\ 0.00E+00 \\ 83.61 % \\ GO:0003700-IBA;GO:0052689-IEA;GO:0006355-IEA;GO:0043565-IBA;GO:0016787-IEA;GO:0005634-IBA \\ DNA-binding transcription factor activity-IBA;carboxylic ester hydrolase activity-IEA;regulation of transcription, DNA-templated-IEA;sequence-specific DNA binding-IBA;hydrolase activity-IEA;nucleus-IBA \\ GO:0003700;GO:0005634;GO:0006355;GO:0043565;GO:0052…		Transcription factor GRAS
TRINITY_DN3017_c0_g1	FvH4_5g11930.1	57.8032	10.537	-47.2662	-5.48574	5.65403e-05	0.029775	transcription factor MYB108-like \\ 6.10E-118 \\ 63.74 % \\ GO:0004869-IEA;GO:0030414-IEA;GO:0010951-IEA;GO:0010466-IEA \\ cysteine-type endopeptidase inhibitor activity-IEA;peptidase inhibitor activity-IEA;negative regulation of endopeptidase activity-IEA;negative regulation of peptidase activity-IEA \\ GO:0004869;GO:0010951 \\ cysteine-type endopeptidase inhibitor activity;negative regulation o…	transcription factor MYB, plant	SANT/Myb domain	TRINITY_DN503_c0_g1	FvH4_3g09340.1	9.02375	3.757	-5.26675	-2.40185	0.0258963	0.984193	heat stress transcription factor B-2a-like \\ 3.50E-100 \\ 77.59 % \\ GO:0000166-IEA;GO:0046177-IEA;GO:0046177-IBA;GO:0046316-IEA;GO:0046316-IBA;GO:0016310-IEA;GO:0016740-IEA;GO:0016301-IEA;GO:0005975-IEA;GO:0005524-IEA \\ nucleotide binding-IEA;D-gluconate catabolic process-IEA;D-gluconate catabolic process-IBA;gluconokinase activity-IEA;gluconokinase activity-IBA;phosphorylation-IEA;transferase…	heat shock transcription factor, other eukaryote	Heat shock factor (HSF)-type, DNA-binding
TRINITY_DN8530_c0_g1	FvH4_3g15320.1	5.73175	1.65675	-4.075	-3.45963	0.000114725	0.0446253	transcription factor MYB63 \\ 0.00E+00 \\ 61.65 % \\ GO:0003677-IEA;GO:0030154-IBA;GO:0044212-IBA;GO:0043565-IBA;GO:0005634-IBA \\ DNA binding-IEA;cell differentiation-IBA;transcription regulatory region DNA binding-IBA;sequence-specific DNA binding-IBA;nucleus-IBA \\ GO:0003677 \\ DNA binding	transcription factor MYB, plant	SANT/Myb domain	TRINITY_DN1603_c1_g1	FvH4_6g24120.1	28.8305	12.036	-16.7945	-2.39536	0.000329145	0.0696427	heat stress transcription factor B-3	heat shock transcription factor, other eukaryote	Heat shock factor (HSF)-type, DNA-binding
TRINITY_DN5182_c0_g1	FvH4_7g12810.1	2.61975	0.95	-1.66975	-2.75763	0.0314261	0.929067	transcription factor TCP9 \\ 2.80E-160 \\ 73.74 % \\ GO:0003677-IEA;GO:0008361-IEA;GO:0048364-IEA;GO:0006351-IEA;GO:1900056-IEA;GO:0006355-IEA;GO:0005634-IEA \\ DNA binding-IEA;regulation of cell size-IEA;root development-IEA;transcription, DNA-templated-IEA;negative regulation of leaf senescence-IEA;regulation of transcription, DNA-templated-IEA;nucleus-IEA \\ GO:0003677;GO:0005634;GO:0006355;GO…		Transcription factor, TCP	TRINITY_DN3462_c1_g1	FvH4_4g13230.1	15.638	6.57475	-9.06325	-2.37849	5.67098e-05	0.0256715	heat stress transcription factor A-5 \\ 0.00E+00 \\ 84.95 % \\ GO:0003677-IEA;GO:0003700-IEA;GO:0006355-IEA;GO:0043565-IEA;GO:0005634-IEA \\ DNA binding-IEA;DNA-binding transcription factor activity-IEA;regulation of transcription, DNA-templated-IEA;sequence-specific DNA binding-IEA;nucleus-IEA \\ GO:0003700;GO:0005634;GO:0006355;GO:0043565 \\ DNA-binding transcription factor activity;nucleus;reg…	heat shock transcription factor, other eukaryote	Heat shock factor (HSF)-type, DNA-binding
TRINITY_DN990_c1_g2	FvH4_2g25610.1	71.156	33.1143	-38.0417	-2.1488	8.60296e-05	0.0370156		general transcription factor 3C polypeptide 3 (transcription factor C subunit 4)	F-box domain	TRINITY_DN4036_c0_g2	FvH4_7g26030.1	41.9997	18.2108	-23.789	-2.30632	0.000764472	0.113664	probable WRKY transcription factor 70 \\ 0.00E+00 \\ 96.19 % \\ GO:0008270-IEA;GO:0016491-IEA;GO:0046872-IEA;GO:0055114-IEA;GO:0008643-IEA \\ zinc ion binding-IEA;oxidoreductase activity-IEA;metal ion binding-IEA;oxidation-reduction process-IEA;carbohydrate transport-IEA \\ GO:0008270;GO:0008643;GO:0016491;GO:0055114 \\ zinc ion binding;carbohydrate transport;oxidoreductase activity;oxidation-red…		WRKY domain
TRINITY_DN24013_c0_g1	FvH4_6g44340.1	2.044	0.7915	-1.2525	-2.58244	0.0295506	0.929067	myb-related protein Myb4-like \\ 2.20E-150 \\ 80.78 % \\ GO:0043531-IEA;GO:0016787-IEA \\ ADP binding-IEA;hydrolase activity-IEA \\ GO:0016787;GO:0043531 \\ hydrolase activity;ADP binding	transcription factor MYB, plant	SANT/Myb domain	TRINITY_DN1376_c0_g3	FvH4_1g18500.1	5.2225	2.43375	-2.78875	-2.14587	0.00422206	0.326886	transcription factor RAX3-like \\ 0.00E+00 \\ 73.10 % \\ GO:0003677-IEA;GO:0044212-IBA;GO:0030154-IBA;GO:0043565-IBA;GO:0005634-IBA \\ DNA binding-IEA;transcription regulatory region DNA binding-IBA;cell differentiation-IBA;sequence-specific DNA binding-IBA;nucleus-IBA \\ GO:0003677 \\ DNA binding	transcription factor MYB, plant	SANT/Myb domain
TRINITY_DN61_c0_g3	FvH4_7g16990.1	116.956	33.0142	-83.9418	-3.54259	0.00187248	0.215319	myb-related protein 308-like \\ 0.00E+00 \\ 82.47 % \\ GO:0016746-IEA;GO:0016020-IEA;GO:0016021-IEA;GO:0016740-IEA \\ transferase activity, transferring acyl groups-IEA;membrane-IEA;integral component of membrane-IEA;transferase activity-IEA \\ GO:0016021;GO:0016746 \\ integral component of membrane;transferase activity, transferring acyl groups	transcription factor MYB, plant	SANT/Myb domain	TRINITY_DN1699_c3_g1	FvH4_4g07090.1	8.4615	3.974	-4.4875	-2.12921	0.0254341	0.980586	transcription factor bHLH35 \\ 1.60E-133 \\ 90.38 % \\ GO:0046983-IEA \\ protein dimerization activity-IEA \\ GO:0046983 \\ protein dimerization activity		Myc-type, basic helix-loop-helix (bHLH) domain
TRINITY_DN5024_c3_g1	FvH4_3g03780.1	1.008	0.27475	-0.73325	-3.66879	0.00751824	0.493637	protein ODORANT1-like \\ 0.00E+00 \\ 87.57 % \\ GO:0003824-IEA;GO:0008265-IEA;GO:0016020-IEA;GO:0102867-IEA;GO:0016021-IEA;GO:0016740-IEA \\ catalytic activity-IEA;Mo-molybdopterin cofactor sulfurase activity-IEA;membrane-IEA;molybdenum cofactor sulfurtransferase activity-IEA;integral component of membrane-IEA;transferase activity-IEA \\ GO:0008265;GO:0016020;GO:0102867 \\ Mo-molybdopterin cofact…	transcription factor MYB, plant	SANT/Myb domain	TRINITY_DN22388_c0_g2	FvH4_4g03610.1	25.146	11.8303	-13.3157	-2.12557	0.000695152	0.108105	myb-related protein Myb4-like \\ 6.40E-91 \\ 73.96 % \\ GO:0003677-IEA;GO:0016020-IEA;GO:0016021-IEA;GO:0044212-IBA;GO:0030154-IBA;GO:0043565-IBA;GO:0005634-IBA \\ DNA binding-IEA;membrane-IEA;integral component of membrane-IEA;transcription regulatory region DNA binding-IBA;cell differentiation-IBA;sequence-specific DNA binding-IBA;nucleus-IBA \\ GO:0005634;GO:0016021;GO:0030154;GO:0043565;GO:00…	transcription factor MYB, plant	SANT/Myb domain
TRINITY_DN1841_c0_g2	FvH4_2g27870.1	2.14875	0.35975	-1.789	-5.9729	0.00175822	0.208374	floral homeotic protein PMADS 2 \\ 3.70E-15 \\ 82.71 %	MADS-box transcription factor, plant	Transcription factor, MADS-box	TRINITY_DN275_c2_g1	FvH4_2g18520.1	9.532	4.5415	-4.9905	-2.09887	9.436e-05	0.0335288	ethylene-responsive transcription factor-like protein At4g13040 \\ 1.30E-126 \\ 78.39 % \\ GO:0003677-IEA;GO:0003700-IEA;GO:0006355-IEA;GO:0005634-IEA \\ DNA binding-IEA;DNA-binding transcription factor activity-IEA;regulation of transcription, DNA-templated-IEA;nucleus-IEA \\ GO:0003677;GO:0003700;GO:0005634;GO:0006355 \\ DNA binding;DNA-binding transcription factor activity;nucleus;regulation o…		AP2/ERF domain
Total downregulated genes=	49										TRINITY_DN3135_c1_g1	FvH4_3g39850.1	21.5375	10.2767	-11.2608	-2.09575	0.00305179	0.266714	WRKY transcription factor WRKY24-like isoform X1 \\ 0.00E+00 \\ 81.19 % \\ GO:0003677-IEA;GO:0003700-IEA;GO:0006355-IEA;GO:0043565-IEA;GO:0005634-IEA \\ DNA binding-IEA;DNA-binding transcription factor activity-IEA;regulation of transcription, DNA-templated-IEA;sequence-specific DNA binding-IEA;nucleus-IEA \\ GO:0003700;GO:0005634;GO:0006355;GO:0043565 \\ DNA-binding transcription factor activity…	WRKY transcription factor 33	WRKY domain
Total DEGs=	77										TRINITY_DN6167_c0_g1	FvH4_2g41060.1	13.4108	6.45	-6.96075	-2.07919	0.00170107	0.184654	probable WRKY transcription factor 40 isoform X1 \\ 0.00E+00 \\ 66.88 % \\ GO:0003677-IEA;GO:0003700-IEA;GO:0006355-IEA;GO:0043565-IEA;GO:0005634-IEA \\ DNA binding-IEA;DNA-binding transcription factor activity-IEA;regulation of transcription, DNA-templated-IEA;sequence-specific DNA binding-IEA;nucleus-IEA \\ GO:0003700;GO:0005634;GO:0006355;GO:0043565 \\ DNA-binding transcription factor activity…		WRKY domain
											TRINITY_DN15162_c0_g2	FvH4_2g16170.1	14.7525	7.2695	-7.483	-2.02937	0.00164995	0.181342	putative transcription factor C2H2 family \\ 0.00E+00 \\ 93.75 % \\ GO:0044183-IBA;GO:0000166-IEA;GO:0051787-IBA;GO:0005737-IBA;GO:0005739-IBA;GO:0034620-IBA;GO:0034605-IBA;GO:0016887-IBA;GO:0031072-IBA;GO:0051085-IBA;GO:0042026-IBA;GO:0006986-IBA;GO:0051082-IEA;GO:0051082-IBA;GO:0005524-IEA;GO:0005524-IBA;GO:0042623-IBA;GO:0006457-IEA \\ protein binding involved in protein folding-IBA;nucleotide…		Zinc finger, RING-type
											TRINITY_DN24013_c0_g1	FvH4_6g44340.1	2.044	0.2505	-1.7935	-8.15968	0.000620025	0.100904	myb-related protein Myb4-like \\ 2.20E-150 \\ 80.78 % \\ GO:0043531-IEA;GO:0016787-IEA \\ ADP binding-IEA;hydrolase activity-IEA \\ GO:0016787;GO:0043531 \\ hydrolase activity;ADP binding	transcription factor MYB, plant	SANT/Myb domain
											TRINITY_DN22388_c0_g1	FvH4_2g21500.1	17.1562	4.943	-12.2133	-3.47082	0.000145739	0.0431102	myb-related protein Myb4 \\ 9.00E-105 \\ 90.27 % \\ GO:0003677-IEA;GO:0016020-IEA;GO:0016021-IEA \\ DNA binding-IEA;membrane-IEA;integral component of membrane-IEA \\ GO:0003677 \\ DNA binding	transcription factor MYB, plant	SANT/Myb domain
											TRINITY_DN61_c0_g3	FvH4_7g16990.1	116.956	35.5078	-81.4483	-3.29382	0.00219799	0.216606	myb-related protein 308-like \\ 0.00E+00 \\ 82.47 % \\ GO:0016746-IEA;GO:0016020-IEA;GO:0016021-IEA;GO:0016740-IEA \\ transferase activity, transferring acyl groups-IEA;membrane-IEA;integral component of membrane-IEA;transferase activity-IEA \\ GO:0016021;GO:0016746 \\ integral component of membrane;transferase activity, transferring acyl groups	transcription factor MYB, plant	SANT/Myb domain
											TRINITY_DN9013_c0_g1	FvH4_5g22100.1	17.668	7.60375	-10.0642	-2.32359	0.0196948	0.848702		transcription factor MYC2	Myc-type, basic helix-loop-helix (bHLH) domain
											TRINITY_DN12291_c0_g1	FvH4_3g09430.1	7.163	3.30125	-3.86175	-2.16978	0.00208192	0.208908		transcription initiation factor TFIIH subunit 4	Transcription factor TFIIH subunit p52/Tfb2
											Total downregulated genes=	57
											Total DEGs=	84
